# Supplementary material for: Genetic Analysis of SARS-CoV-2 Variants in Mexico during the First Year of the COVID-19 Pandemic
Source: MDPI journal article supplement (doi:10.3390/v13112161), 2021-10-26
Supplement: s1 [file s1]

**Table S2. Patient demographic and clinical characteristics. The information of the 1520 genome sequences generated by us are shown in blue.**

| Virus name                           | Accession ID    | Collection date | Location            | Host  | Gender | Patient age | Patient status | Passage  | Specimen                              |
|--------------------------------------|-----------------|-----------------|---------------------|-------|--------|-------------|----------------|----------|---------------------------------------|
| hCoV-19/Mexico/CAM-IBT-IMSS-426/2020 | EPI_ISL_1301620 | 18/03/2020      | Campeche            | Human | Female | 59          | Ambulatory     | Original | Nasopharyngeal and oropharyngeal swab |
| hCoV-19/Mexico/ROO-IBT-IMSS-427/2020 | EPI_ISL_1301498 | 25/03/2020      | Quintana Roo        | Human | Female | 35          | Ambulatory     | Original | Nasopharyngeal and oropharyngeal swab |
| hCoV-19/Mexico/GUA-IBT-IMSS-428/2020 | EPI_ISL_1301621 | 26/03/2020      | Guanajuato          | Human | Female | 59          | Ambulatory     | Original | Nasopharyngeal and oropharyngeal swab |
| hCoV-19/Mexico/TLA-IBT-IMSS-429/2020 | EPI_ISL_1301622 | 27/03/2020      | Tlaxcala            | Human | Female | 20          | Ambulatory     | Original | Nasopharyngeal and oropharyngeal swab |
| hCoV-19/Mexico/CMX-INER-IBT-2/2020   | EPI_ISL_1301718 | 27/03/2020      | Mexico City         | Human | Female | unknown     | Hospitalized   | Original | Pharyngeal swab                       |
| hCoV-19/Mexico/CMX-INER-IBT-1/2020   | EPI_ISL_1301717 | 28/03/2020      | Mexico City         | Human | Female | unknown     | Hospitalized   | Original | Pharyngeal swab                       |
| hCoV-19/Mexico/CMX-INER-IBT-4/2020   | EPI_ISL_1301520 | 29/03/2020      | Mexico City         | Human | Male   | unknown     | Hospitalized   | Original | Pharyngeal swab                       |
| hCoV-19/Mexico/CMX-INER-IBT-5/2020   | EPI_ISL_1301731 | 30/03/2020      | Mexico City         | Human | Male   | unknown     | Hospitalized   | Original | Tracheal aspirate                     |
| hCoV-19/Mexico/COL-IBT-IMSS-430/2020 | EPI_ISL_1301450 | 01/04/2020      | Colima              | Human | Male   | 54          | Hospitalized   | Original | Nasopharyngeal and oropharyngeal swab |
| hCoV-19/Mexico/CMX-IBT-IMSS-02/2020  | EPI_ISL_955257  | 01/04/2020      | Mexico City         | Human | Male   | 31          | Deceased       | Original | Nasopharyngeal and oropharyngeal swab |
| hCoV-19/Mexico/ROO-IBT-IMSS-432/2020 | EPI_ISL_1301623 | 02/04/2020      | Quintana Roo        | Human | Male   | 22          | Ambulatory     | Original | Nasopharyngeal and oropharyngeal swab |
| hCoV-19/Mexico/ROO-IBT-IMSS-433/2020 | EPI_ISL_1301624 | 02/04/2020      | Quintana Roo        | Human | Male   | 25          | Ambulatory     | Original | Nasopharyngeal and oropharyngeal swab |
| hCoV-19/Mexico/CMX-INER-IBT-6/2020   | EPI_ISL_1301452 | 02/04/2020      | Mexico City         | Human | Male   | unknown     | Hospitalized   | Original | Nasopharyngeal swab                   |
| hCoV-19/Mexico/SIN-IBT-IMSS-431/2020 | EPI_ISL_1301462 | 02/04/2020      | Sinaloa             | Human | Female | 49          | Ambulatory     | Original | Nasopharyngeal and oropharyngeal swab |
| hCoV-19/Mexico/ROO-IBT-IMSS-435/2020 | EPI_ISL_1301625 | 03/04/2020      | Quintana Roo        | Human | Female | 26          | Ambulatory     | Original | Nasopharyngeal and oropharyngeal swab |
| hCoV-19/Mexico/ROO-IBT-IMSS-434/2020 | EPI_ISL_1301473 | 03/04/2020      | Quintana Roo        | Human | Male   | 23          | Hospitalized   | Original | Nasopharyngeal and oropharyngeal swab |
| hCoV-19/Mexico/CMX-INER-IBT-8/2020   | EPI_ISL_1301489 | 03/04/2020      | Mexico City         | Human | Male   | unknown     | Hospitalized   | Original | Nasopharyngeal swab                   |
| hCoV-19/Mexico/GUA-IBT-IMSS-438/2020 | EPI_ISL_1301466 | 04/04/2020      | Guanajuato          | Human | Male   | 35          | Ambulatory     | Original | Nasopharyngeal and oropharyngeal swab |
| hCoV-19/Mexico/CMX-INER-IBT-7/2020   | EPI_ISL_1301598 | 05/04/2020      | Mexico City         | Human | Male   | unknown     | Hospitalized   | Original | Nasopharyngeal swab                   |
| hCoV-19/Mexico/CMX-IBT-IMSS-03/2020  | EPI_ISL_955256  | 05/04/2020      | Mexico City         | Human | Male   | 55          | Hospitalized   | Original | Nasopharyngeal and oropharyngeal swab |
| hCoV-19/Mexico/GUA-IBT-IMSS-437/2020 | EPI_ISL_1301509 | 06/04/2020      | Guanajuato          | Human | Female | 42          | Hospitalized   | Original | Nasopharyngeal and oropharyngeal swab |
| hCoV-19/Mexico/CHH-IBT-IMSS-439/2020 | EPI_ISL_1301552 | 06/04/2020      | Chihuahua           | Human | Male   | 26          | Ambulatory     | Original | Nasopharyngeal and oropharyngeal swab |
| hCoV-19/Mexico/QUE-IBT-IMSS-436/2020 | EPI_ISL_1301626 | 06/04/2020      | Queretaro           | Human | Male   | 42          | Hospitalized   | Original | Nasopharyngeal and oropharyngeal swab |
| hCoV-19/Mexico/TAB-IBT-IMSS-441/2020 | EPI_ISL_1301628 | 06/04/2020      | Tabasco             | Human | Female | 45          | Ambulatory     | Original | Nasopharyngeal and oropharyngeal swab |
| hCoV-19/Mexico/TAB-IBT-IMSS-442/2020 | EPI_ISL_1301629 | 06/04/2020      | Tabasco             | Human | Male   | 49          | Ambulatory     | Original | Nasopharyngeal and oropharyngeal swab |
| hCoV-19/Mexico/BCS-IBT-IMSS-20/2020  | EPI_ISL_955255  | 06/04/2020      | Baja California Sur | Human | Male   | 39          | Ambulatory     | Original | Nasopharyngeal and oropharyngeal swab |
| hCoV-19/Mexico/CMX-INER-IBT-12/2020  | EPI_ISL_1301605 | 07/04/2020      | Mexico City         | Human | Male   | unknown     | Hospitalized   | Original | Nasopharyngeal swab                   |
| hCoV-19/Mexico/AGU-InDRE-IBT-42/2020 | EPI_ISL_1301681 | 07/04/2020      | Aguascalientes      | Human | Male   | 41          | Ambulatory     | Original | Pharyngeal swab                       |
| hCoV-19/Mexico/BCS-IBT-IMSS-09/2020  | EPI_ISL_955250  | 07/04/2020      | Baja California Sur | Human | Female | 43          | Ambulatory     | Original | Nasopharyngeal and oropharyngeal swab |
| hCoV-19/Mexico/BCS-IBT-IMSS-12/2020  | EPI_ISL_955251  | 07/04/2020      | Baja California Sur | Human | Male   | 48          | Ambulatory     | Original | Nasopharyngeal and oropharyngeal swab |
| hCoV-19/Mexico/BCS-IBT-IMSS-13/2020  | EPI_ISL_955252  | 07/04/2020      | Baja California Sur | Human | Female | 50          | Ambulatory     | Original | Nasopharyngeal and oropharyngeal swab |
| hCoV-19/Mexico/BCS-IBT-IMSS-14/2020  | EPI_ISL_955253  | 07/04/2020      | Baja California Sur | Human | Male   | 37          | Ambulatory     | Original | Nasopharyngeal and oropharyngeal swab |
| hCoV-19/Mexico/CMX-IBT-IMSS-07/2020  | EPI_ISL_955254  | 07/04/2020      | Mexico City         | Human | Male   | 49          | Ambulatory     | Original | Nasopharyngeal and oropharyngeal swab |
| hCoV-19/Mexico/TLA-IBT-IMSS-440/2020 | EPI_ISL_1301627 | 08/04/2020      | Tlaxcala            | Human | Female | 39          | Ambulatory     | Original | Nasopharyngeal and oropharyngeal swab |
| hCoV-19/Mexico/AGU-IBT-IMSS-446/2020 | EPI_ISL_1301631 | 08/04/2020      | Aguascalientes      | Human | Male   | 57          | Ambulatory     | Original | Nasopharyngeal and oropharyngeal swab |
| hCoV-19/Mexico/BCS-IBT-IMSS-11/2020  | EPI_ISL_955233  | 08/04/2020      | Baja California Sur | Human | Female | 33          | Ambulatory     | Original | Nasopharyngeal and oropharyngeal swab |

|                                      |                 |            |                     |       |        |         |              |          |                                       |
|--------------------------------------|-----------------|------------|---------------------|-------|--------|---------|--------------|----------|---------------------------------------|
| hCoV-19/Mexico/BCN-IBT-IMSS-17/2020  | EPI_ISL_955240  | 08/04/2020 | Baja California     | Human | Male   | 42      | Ambulatory   | Original | Nasopharyngeal and oropharyngeal swab |
| hCoV-19/Mexico/BCN-IBT-IMSS-18/2020  | EPI_ISL_955241  | 08/04/2020 | Baja California     | Human | Male   | 24      | Ambulatory   | Original | Nasopharyngeal and oropharyngeal swab |
| hCoV-19/Mexico/BCS-IBT-IMSS-15/2020  | EPI_ISL_955242  | 08/04/2020 | Baja California Sur | Human | Female | 41      | Ambulatory   | Original | Nasopharyngeal and oropharyngeal swab |
| hCoV-19/Mexico/BCS-IBT-IMSS-16/2020  | EPI_ISL_955243  | 08/04/2020 | Baja California Sur | Human | Female | 35      | Ambulatory   | Original | Nasopharyngeal and oropharyngeal swab |
| hCoV-19/Mexico/GRO-IBT-IMSS-08/2020  | EPI_ISL_955244  | 08/04/2020 | Guerrero            | Human | Male   | 59      | Deceased     | Original | Nasopharyngeal and oropharyngeal swab |
| hCoV-19/Mexico/GRO-IBT-IMSS-10/2020  | EPI_ISL_955245  | 08/04/2020 | Guerrero            | Human | Male   | 32      | Ambulatory   | Original | Nasopharyngeal and oropharyngeal swab |
| hCoV-19/Mexico/MEX-IBT-IMSS-04/2020  | EPI_ISL_955246  | 08/04/2020 | State of Mexico     | Human | Female | 26      | Ambulatory   | Original | Nasopharyngeal and oropharyngeal swab |
| hCoV-19/Mexico/MEX-IBT-IMSS-19/2020  | EPI_ISL_955247  | 08/04/2020 | State of Mexico     | Human | Male   | 26      | Ambulatory   | Original | Nasopharyngeal and oropharyngeal swab |
| hCoV-19/Mexico/CMX-IBT-IMSS-05/2020  | EPI_ISL_955248  | 08/04/2020 | Mexico City         | Human | Male   | 30      | Ambulatory   | Original | Pharyngeal swab                       |
| hCoV-19/Mexico/CMX-IBT-IMSS-06/2020  | EPI_ISL_955249  | 08/04/2020 | Mexico City         | Human | Male   | 22      | Hospitalized | Original | Nasopharyngeal and oropharyngeal swab |
| hCoV-19/Mexico/AGU-InDRE-IBT-43/2020 | EPI_ISL_1301682 | 09/04/2020 | Aguascalientes      | Human | Male   | 62      | Ambulatory   | Original | Pharyngeal swab                       |
| hCoV-19/Mexico/CMX-INER-IBT-10/2020  | EPI_ISL_1301600 | 10/04/2020 | Mexico City         | Human | Male   | unknown | Hospitalized | Original | Nasopharyngeal swab                   |
| hCoV-19/Mexico/BCN-IBT-IMSS-445/2020 | EPI_ISL_1301630 | 10/04/2020 | Baja California     | Human | Male   | 33      | Ambulatory   | Original | Nasopharyngeal and oropharyngeal swab |
| hCoV-19/Mexico/CMX-INER-IBT-11/2020  | EPI_ISL_1301490 | 10/04/2020 | Mexico City         | Human | Male   | unknown | Hospitalized | Original | Nasopharyngeal swab                   |
| hCoV-19/Mexico/SLP-InDRE-IBT-40/2020 | EPI_ISL_1301679 | 11/04/2020 | San Luis Potosi     | Human | Male   | 31      | Ambulatory   | Original | Pharyngeal swab                       |
| hCoV-19/Mexico/SLP-InDRE-IBT-41/2020 | EPI_ISL_1301680 | 11/04/2020 | San Luis Potosi     | Human | Female | 30      | Ambulatory   | Original | Pharyngeal swab                       |
| hCoV-19/Mexico/OAX-IBT-IMSS-443/2020 | EPI_ISL_1301446 | 11/04/2020 | Oaxaca              | Human | Male   | 27      | Ambulatory   | Original | Nasopharyngeal and oropharyngeal swab |
| hCoV-19/Mexico/TLA-IBT-IMSS-444/2020 | EPI_ISL_1301467 | 11/04/2020 | Tlaxcala            | Human | Male   | 66      | Hospitalized | Original | Nasopharyngeal and oropharyngeal swab |
| hCoV-19/Mexico/AGU-IBT-IMSS-447/2020 | EPI_ISL_1301525 | 12/04/2020 | Aguascalientes      | Human | Female | 43      | Ambulatory   | Original | Nasopharyngeal and oropharyngeal swab |
| hCoV-19/Mexico/AGU-InDRE-IBT-44/2020 | EPI_ISL_1301683 | 12/04/2020 | Aguascalientes      | Human | Male   | unknown | unknown      | Original | Pharyngeal swab                       |
| hCoV-19/Mexico/AGU-InDRE-IBT-45/2020 | EPI_ISL_1301684 | 12/04/2020 | Aguascalientes      | Human | Male   | 55      | Hospitalized | Original | Pharyngeal swab                       |
| hCoV-19/Mexico/AGU-InDRE-IBT-47/2020 | EPI_ISL_1301686 | 12/04/2020 | Aguascalientes      | Human | Female | 38      | Ambulatory   | Original | Pharyngeal swab                       |
| hCoV-19/Mexico/CMX-INER-IBT-13/2020  | EPI_ISL_1301465 | 12/04/2020 | Mexico City         | Human | Male   | unknown | Hospitalized | Original | Nasopharyngeal swab                   |
| hCoV-19/Mexico/MOR-IBT-IMSS-453/2020 | EPI_ISL_1301636 | 13/04/2020 | Morelos             | Human | Female | 46      | Ambulatory   | Original | Nasopharyngeal and oropharyngeal swab |
| hCoV-19/Mexico/AGU-InDRE-IBT-46/2020 | EPI_ISL_1301685 | 13/04/2020 | Aguascalientes      | Human | Female | 54      | Ambulatory   | Original | Pharyngeal swab                       |
| hCoV-19/Mexico/TLA-IBT-IMSS-448/2020 | EPI_ISL_1301484 | 13/04/2020 | Tlaxcala            | Human | Female | 62      | Hospitalized | Original | Nasopharyngeal and oropharyngeal swab |
| hCoV-19/Mexico/CMX-IBT-IMSS-22/2020  | EPI_ISL_955234  | 16/04/2020 | Mexico City         | Human | Female | 47      | Ambulatory   | Original | Nasopharyngeal and oropharyngeal swab |
| hCoV-19/Mexico/CMX-IBT-IMSS-21/2020  | EPI_ISL_955239  | 16/04/2020 | Mexico City         | Human | Male   | 26      | Ambulatory   | Original | Nasopharyngeal and oropharyngeal swab |
| hCoV-19/Mexico/PUE-IBT-IMSS-449/2020 | EPI_ISL_1301632 | 17/04/2020 | Puebla              | Human | Male   | 63      | Ambulatory   | Original | Nasopharyngeal and oropharyngeal swab |
| hCoV-19/Mexico/PUE-IBT-IMSS-457/2020 | EPI_ISL_1301640 | 17/04/2020 | Puebla              | Human | Female | 64      | Ambulatory   | Original | Nasopharyngeal and oropharyngeal swab |
| hCoV-19/Mexico/GRO-IBT-IMSS-26/2020  | EPI_ISL_955236  | 17/04/2020 | Guerrero            | Human | Female | 38      | Ambulatory   | Original | Nasopharyngeal and oropharyngeal swab |
| hCoV-19/Mexico/MEX-IBT-IMSS-25/2020  | EPI_ISL_955237  | 17/04/2020 | State of Mexico     | Human | Female | 29      | Ambulatory   | Original | Nasopharyngeal and oropharyngeal swab |
| hCoV-19/Mexico/CMX-IBT-IMSS-24/2020  | EPI_ISL_955238  | 17/04/2020 | Mexico City         | Human | Male   | 46      | Hospitalized | Original | Nasopharyngeal and oropharyngeal swab |
| hCoV-19/Mexico/PUE-IBT-IMSS-450/2020 | EPI_ISL_1301633 | 18/04/2020 | Puebla              | Human | Female | 59      | Ambulatory   | Original | Nasopharyngeal and oropharyngeal swab |
| hCoV-19/Mexico/PUE-IBT-IMSS-451/2020 | EPI_ISL_1301634 | 18/04/2020 | Puebla              | Human | Male   | 38      | Ambulatory   | Original | Nasopharyngeal and oropharyngeal swab |
| hCoV-19/Mexico/CMX-INER-IBT-14/2020  | EPI_ISL_1301606 | 19/04/2020 | Mexico City         | Human | Male   | unknown | Hospitalized | Original | Nasopharyngeal swab                   |
| hCoV-19/Mexico/PUE-IBT-IMSS-454/2020 | EPI_ISL_1301637 | 19/04/2020 | Puebla              | Human | Male   | 52      | Hospitalized | Original | Nasopharyngeal and oropharyngeal swab |
| hCoV-19/Mexico/CMX-IBT-IMSS-23/2020  | EPI_ISL_955235  | 19/04/2020 | Mexico City         | Human | Male   | 27      | Ambulatory   | Original | Nasopharyngeal swab                   |
| hCoV-19/Mexico/CMX-INER-IBT-16/2020  | EPI_ISL_1301608 | 20/04/2020 | Mexico City         | Human | Male   | unknown | Hospitalized | Original | Nasopharyngeal swab                   |
| hCoV-19/Mexico/PUE-IBT-IMSS-452/2020 | EPI_ISL_1301635 | 20/04/2020 | Puebla              | Human | Male   | 30      | Ambulatory   | Original | Nasopharyngeal and oropharyngeal swab |
| hCoV-19/Mexico/OAX-IBT-IMSS-455/2020 | EPI_ISL_1301638 | 20/04/2020 | Oaxaca              | Human | Male   | 82      | Hospitalized | Original | Nasopharyngeal and oropharyngeal swab |

|                                       |                 |            |                     |       |        |         |              |          |                                       |
|---------------------------------------|-----------------|------------|---------------------|-------|--------|---------|--------------|----------|---------------------------------------|
| hCoV-19/Mexico/MIC-IBT-IMSS-459/2020  | EPI_ISL_1301642 | 20/04/2020 | Michoacan           | Human | Female | 25      | Ambulatory   | Original | Nasopharyngeal and oropharyngeal swab |
| hCoV-19/Mexico/CMX-INNER-IBT-17/2020  | EPI_ISL_1301719 | 20/04/2020 | Mexico City         | Human | Male   | unknown | Hospitalized | Original | Pharyngeal swab                       |
| hCoV-19/Mexico/CMX-INNER-IBT-15/2020  | EPI_ISL_1301607 | 21/04/2020 | Mexico City         | Human | Female | unknown | Hospitalized | Original | Nasopharyngeal swab                   |
| hCoV-19/Mexico/CMX-INNER-IBT-19/2020  | EPI_ISL_1301503 | 22/04/2020 | Mexico City         | Human | Male   | unknown | Hospitalized | Original | Pharyngeal swab                       |
| hCoV-19/Mexico/CMX-INNER-IBT-18/2020  | EPI_ISL_1301609 | 22/04/2020 | Mexico City         | Human | Male   | unknown | Hospitalized | Original | Nasopharyngeal swab                   |
| hCoV-19/Mexico/PUE-IBT-IMSS-456/2020  | EPI_ISL_1301639 | 22/04/2020 | Puebla              | Human | Male   | 42      | Hospitalized | Original | Nasopharyngeal and oropharyngeal swab |
| hCoV-19/Mexico/COL-IBT-IMSS-458/2020  | EPI_ISL_1301641 | 23/04/2020 | Colima              | Human | Male   | 40      | Ambulatory   | Original | Nasopharyngeal and oropharyngeal swab |
| hCoV-19/Mexico/PUE-IBT-IMSS-460/2020  | EPI_ISL_1301643 | 23/04/2020 | Puebla              | Human | Female | 47      | Ambulatory   | Original | Nasopharyngeal and oropharyngeal swab |
| hCoV-19/Mexico/MEX-InDRE-IBT-119/2020 | EPI_ISL_1301575 | 24/04/2020 | State of Mexico     | Human | Male   | 54      | Ambulatory   | Original | Nasopharyngeal swab                   |
| hCoV-19/Mexico/COL-IBT-IMSS-461/2020  | EPI_ISL_1301644 | 24/04/2020 | Colima              | Human | Female | 29      | Ambulatory   | Original | Nasopharyngeal and oropharyngeal swab |
| hCoV-19/Mexico/PUE-IBT-IMSS-462/2020  | EPI_ISL_1301645 | 24/04/2020 | Puebla              | Human | Male   | 30      | Hospitalized | Original | Nasopharyngeal and oropharyngeal swab |
| hCoV-19/Mexico/BCN-IBT-IMSS-476/2020  | EPI_ISL_1301657 | 24/04/2020 | Baja California     | Human | Male   | 37      | Ambulatory   | Original | Nasopharyngeal and oropharyngeal swab |
| hCoV-19/Mexico/PUE-IBT-IMSS-466/2020  | EPI_ISL_1301649 | 25/04/2020 | Puebla              | Human | Male   | 61      | Hospitalized | Original | Nasopharyngeal and oropharyngeal swab |
| hCoV-19/Mexico/MEX-InDRE-IBT-112/2020 | EPI_ISL_1301447 | 25/04/2020 | State of Mexico     | Human | Male   | 46      | Ambulatory   | Original | Nasopharyngeal swab                   |
| hCoV-19/Mexico/BCS-IBT-IMSS-468/2020  | EPI_ISL_1301593 | 26/04/2020 | Baja California Sur | Human | Female | 81      | Hospitalized | Original | Nasopharyngeal swab                   |
| hCoV-19/Mexico/BCS-IBT-IMSS-469/2020  | EPI_ISL_1301651 | 26/04/2020 | Baja California Sur | Human | Female | 34      | Hospitalized | Original | Nasopharyngeal and oropharyngeal swab |
| hCoV-19/Mexico/BCS-IBT-IMSS-470/2020  | EPI_ISL_1301652 | 26/04/2020 | Baja California Sur | Human | Female | 28      | Ambulatory   | Original | Nasopharyngeal and oropharyngeal swab |
| hCoV-19/Mexico/SLP-InDRE-IBT-50/2020  | EPI_ISL_1301528 | 27/04/2020 | San Luis Potosi     | Human | Male   | unknown | unknown      | Original | Pharyngeal swab                       |
| hCoV-19/Mexico/MEX-InDRE-IBT-121/2020 | EPI_ISL_1301577 | 27/04/2020 | State of Mexico     | Human | Male   | 67      | Deceased     | Original | Nasopharyngeal swab                   |
| hCoV-19/Mexico/CMX-INNER-IBT-20/2020  | EPI_ISL_1301610 | 27/04/2020 | Mexico City         | Human | Male   | unknown | Hospitalized | Original | Nasopharyngeal swab                   |
| hCoV-19/Mexico/COL-IBT-IMSS-463/2020  | EPI_ISL_1301646 | 27/04/2020 | Colima              | Human | Male   | 27      | Ambulatory   | Original | Nasopharyngeal and oropharyngeal swab |
| hCoV-19/Mexico/MOR-IBT-IMSS-464/2020  | EPI_ISL_1301647 | 27/04/2020 | Morelos             | Human | Male   | 54      | Ambulatory   | Original | Nasopharyngeal and oropharyngeal swab |
| hCoV-19/Mexico/MOR-IBT-IMSS-465/2020  | EPI_ISL_1301648 | 27/04/2020 | Morelos             | Human | Female | 44      | Ambulatory   | Original | Nasopharyngeal and oropharyngeal swab |
| hCoV-19/Mexico/MOR-IBT-IMSS-467/2020  | EPI_ISL_1301650 | 27/04/2020 | Morelos             | Human | Female | 42      | Ambulatory   | Original | Nasopharyngeal and oropharyngeal swab |
| hCoV-19/Mexico/CMX-INNER-IBT-22/2020  | EPI_ISL_1301499 | 28/04/2020 | Mexico City         | Human | Male   | unknown | Hospitalized | Original | Nasopharyngeal swab                   |
| hCoV-19/Mexico/MEX-InDRE-IBT-120/2020 | EPI_ISL_1301576 | 28/04/2020 | State of Mexico     | Human | Male   | unknown | Ambulatory   | Original | Nasopharyngeal swab                   |
| hCoV-19/Mexico/MEX-InDRE-IBT-122/2020 | EPI_ISL_1301578 | 28/04/2020 | State of Mexico     | Human | Male   | 52      | Deceased     | Original | Nasopharyngeal swab                   |
| hCoV-19/Mexico/YUC-InDRE-IBT-135/2020 | EPI_ISL_1301591 | 28/04/2020 | Yucatan             | Human | Female | unknown | unknown      | Original | Nasopharyngeal swab                   |
| hCoV-19/Mexico/CMX-INNER-IBT-21/2020  | EPI_ISL_1301611 | 28/04/2020 | Mexico City         | Human | Male   | unknown | Hospitalized | Original | Nasopharyngeal swab                   |
| hCoV-19/Mexico/BCN-IBT-IMSS-474/2020  | EPI_ISL_1301655 | 28/04/2020 | Baja California     | Human | Female | 54      | Ambulatory   | Original | Nasopharyngeal and oropharyngeal swab |
| hCoV-19/Mexico/BCN-IBT-IMSS-475/2020  | EPI_ISL_1301656 | 28/04/2020 | Baja California     | Human | Male   | 39      | Hospitalized | Original | Nasopharyngeal and oropharyngeal swab |
| hCoV-19/Mexico/CMX-INNER-IBT-23/2020  | EPI_ISL_1301515 | 29/04/2020 | Mexico City         | Human | Male   | unknown | Hospitalized | Original | Pharyngeal swab                       |
| hCoV-19/Mexico/CMX-INNER-IBT-24/2020  | EPI_ISL_1301612 | 29/04/2020 | Mexico City         | Human | Female | unknown | Hospitalized | Original | Nasopharyngeal swab                   |
| hCoV-19/Mexico/CMX-INNER-IBT-25/2020  | EPI_ISL_1301613 | 29/04/2020 | Mexico City         | Human | Female | unknown | Hospitalized | Original | Nasopharyngeal swab                   |
| hCoV-19/Mexico/MOR-IBT-IMSS-471/2020  | EPI_ISL_1301653 | 29/04/2020 | Morelos             | Human | Male   | 40      | Ambulatory   | Original | Nasopharyngeal and oropharyngeal swab |
| hCoV-19/Mexico/BCN-IBT-IMSS-477/2020  | EPI_ISL_1301658 | 29/04/2020 | Baja California     | Human | Female | 42      | Ambulatory   | Original | Nasopharyngeal and oropharyngeal swab |
| hCoV-19/Mexico/BCN-IBT-IMSS-478/2020  | EPI_ISL_1301659 | 29/04/2020 | Baja California     | Human | Female | 34      | Ambulatory   | Original | Nasopharyngeal and oropharyngeal swab |
| hCoV-19/Mexico/ZAC-InDRE-IBT-49/2020  | EPI_ISL_1301519 | 30/04/2020 | Zacatecas           | Human | Female | 65      | Deceased     | Original | Pharyngeal swab                       |
| hCoV-19/Mexico/BCN-IBT-IMSS-479/2020  | EPI_ISL_1301530 | 30/04/2020 | Baja California     | Human | Male   | 19      | Ambulatory   | Original | Nasopharyngeal and oropharyngeal swab |
| hCoV-19/Mexico/BCS-IBT-IMSS-473/2020  | EPI_ISL_1301535 | 30/04/2020 | Baja California Sur | Human | Male   | 38      | Ambulatory   | Original | Pharyngeal swab                       |
| hCoV-19/Mexico/CMX-INNER-IBT-28/2020  | EPI_ISL_1301614 | 30/04/2020 | Mexico City         | Human | Female | unknown | Hospitalized | Original | Nasopharyngeal swab                   |

|                                       |                 |            |                     |       |        |         |              |          |                                       |
|---------------------------------------|-----------------|------------|---------------------|-------|--------|---------|--------------|----------|---------------------------------------|
| hCoV-19/Mexico/BCN-IBT-IMSS-480/2020  | EPI_ISL_1301660 | 30/04/2020 | Baja California     | Human | Male   | 47      | Ambulatory   | Original | Nasopharyngeal and oropharyngeal swab |
| hCoV-19/Mexico/BCN-IBT-IMSS-481/2020  | EPI_ISL_1301661 | 30/04/2020 | Baja California     | Human | Male   | 25      | Ambulatory   | Original | Nasopharyngeal and oropharyngeal swab |
| hCoV-19/Mexico/BCN-IBT-IMSS-483/2020  | EPI_ISL_1301662 | 30/04/2020 | Baja California     | Human | Male   | 50      | Hospitalized | Original | Nasopharyngeal and oropharyngeal swab |
| hCoV-19/Mexico/BCN-IBT-IMSS-484/2020  | EPI_ISL_1301663 | 30/04/2020 | Baja California     | Human | Female | 76      | Hospitalized | Original | Nasopharyngeal and oropharyngeal swab |
| hCoV-19/Mexico/CMX-INER-IBT-29/2020   | EPI_ISL_1301524 | 01/05/2020 | Mexico City         | Human | Female | unknown | Hospitalized | Original | Nasopharyngeal swab                   |
| hCoV-19/Mexico/BCN-IBT-IMSS-482/2020  | EPI_ISL_1301538 | 01/05/2020 | Baja California     | Human | Female | 35      | Ambulatory   | Original | Nasopharyngeal and oropharyngeal swab |
| hCoV-19/Mexico/MOR-IBT-IMSS-472/2020  | EPI_ISL_1301654 | 01/05/2020 | Morelos             | Human | Female | 39      | Ambulatory   | Original | Nasopharyngeal and oropharyngeal swab |
| hCoV-19/Mexico/MEX-InDRE-IBT-125/2020 | EPI_ISL_1301709 | 01/05/2020 | State of Mexico     | Human | Male   | 74      | Deceased     | Original | Pharyngeal swab                       |
| hCoV-19/Mexico/BCN-IBT-IMSS-486/2020  | EPI_ISL_1301665 | 02/05/2020 | Baja California     | Human | Female | 30      | Ambulatory   | Original | Nasopharyngeal and oropharyngeal swab |
| hCoV-19/Mexico/BCN-IBT-IMSS-487/2020  | EPI_ISL_1301666 | 02/05/2020 | Baja California     | Human | Female | 37      | Ambulatory   | Original | Nasopharyngeal and oropharyngeal swab |
| hCoV-19/Mexico/ZAC-InDRE-IBT-57/2020  | EPI_ISL_1301690 | 02/05/2020 | Zacatecas           | Human | Male   | 27      | Hospitalized | Original | Pharyngeal swab                       |
| hCoV-19/Mexico/BCN-IBT-IMSS-488/2020  | EPI_ISL_1301714 | 02/05/2020 | Baja California     | Human | Female | 43      | Ambulatory   | Original | Pharyngeal swab                       |
| hCoV-19/Mexico/CMX-INER-IBT-26/2020   | EPI_ISL_1301522 | 03/05/2020 | Mexico City         | Human | Male   | unknown | Hospitalized | Original | Pharyngeal swab                       |
| hCoV-19/Mexico/OAX-InDRE-IBT-18/2020  | EPI_ISL_1301529 | 03/05/2020 | Oaxaca              | Human | Male   | 63      | Deceased     | Original | Nasopharyngeal swab                   |
| hCoV-19/Mexico/DUR-InDRE-IBT-109/2020 | EPI_ISL_1301456 | 03/05/2020 | Durango             | Human | Female | 33      | Ambulatory   | Original | Nasopharyngeal swab                   |
| hCoV-19/Mexico/BCN-IBT-IMSS-489/2020  | EPI_ISL_1301715 | 03/05/2020 | Baja California     | Human | Male   | 58      | Ambulatory   | Original | Pharyngeal swab                       |
| hCoV-19/Mexico/CMX-INER-IBT-27/2020   | EPI_ISL_1301720 | 03/05/2020 | Mexico City         | Human | Male   | unknown | Hospitalized | Original | Pharyngeal swab                       |
| hCoV-19/Mexico/MEX-InDRE-IBT-123/2020 | EPI_ISL_1301579 | 04/05/2020 | State of Mexico     | Human | Male   | 38      | Ambulatory   | Original | Nasopharyngeal swab                   |
| hCoV-19/Mexico/CMX-InDRE-IBT-118/2020 | EPI_ISL_1301580 | 04/05/2020 | Mexico City         | Human | Male   | 37      | Ambulatory   | Original | Nasopharyngeal swab                   |
| hCoV-19/Mexico/CMX-InDRE-IBT-113/2020 | EPI_ISL_1301581 | 04/05/2020 | Mexico City         | Human | Male   | 42      | Ambulatory   | Original | Nasopharyngeal swab                   |
| hCoV-19/Mexico/CMX-InDRE-IBT-114/2020 | EPI_ISL_1301582 | 04/05/2020 | Mexico City         | Human | Male   | 42      | Ambulatory   | Original | Nasopharyngeal swab                   |
| hCoV-19/Mexico/CMX-InDRE-IBT-115/2020 | EPI_ISL_1301583 | 04/05/2020 | Mexico City         | Human | Male   | 31      | Ambulatory   | Original | Nasopharyngeal swab                   |
| hCoV-19/Mexico/MEX-InDRE-IBT-116/2020 | EPI_ISL_1301584 | 04/05/2020 | State of Mexico     | Human | Female | 30      | Ambulatory   | Original | Nasopharyngeal swab                   |
| hCoV-19/Mexico/GRO-IBT-IMSS-485/2020  | EPI_ISL_1301664 | 04/05/2020 | Guerrero            | Human | Female | 33      | Ambulatory   | Original | Nasopharyngeal and oropharyngeal swab |
| hCoV-19/Mexico/BCS-IBT-IMSS-491/2020  | EPI_ISL_1301667 | 04/05/2020 | Baja California Sur | Human | Female | 44      | Ambulatory   | Original | Nasopharyngeal and oropharyngeal swab |
| hCoV-19/Mexico/MEX-InDRE-IBT-124/2020 | EPI_ISL_1301494 | 04/05/2020 | State of Mexico     | Human | Male   | 40      | Deceased     | Original | Nasopharyngeal swab                   |
| hCoV-19/Mexico/BCS-IBT-IMSS-493/2020  | EPI_ISL_1301669 | 05/05/2020 | Baja California Sur | Human | Female | 39      | Ambulatory   | Original | Nasopharyngeal and oropharyngeal swab |
| hCoV-19/Mexico/BCS-IBT-IMSS-494/2020  | EPI_ISL_1301670 | 05/05/2020 | Baja California Sur | Human | Female | 25      | Ambulatory   | Original | Nasopharyngeal and oropharyngeal swab |
| hCoV-19/Mexico/CMX-INER-IBT-34/2020   | EPI_ISL_1301721 | 05/05/2020 | Mexico City         | Human | Female | unknown | Hospitalized | Original | Pharyngeal swab                       |
| hCoV-19/Mexico/TLA-InDRE-IBT-16/2020  | EPI_ISL_1301540 | 06/05/2020 | Tlaxcala            | Human | Male   | 35      | Ambulatory   | Original | Pharyngeal swab                       |
| hCoV-19/Mexico/CMX-INER-IBT-35/2020   | EPI_ISL_1301550 | 06/05/2020 | Mexico City         | Human | Male   | unknown | Hospitalized | Original | Pharyngeal swab                       |
| hCoV-19/Mexico/BCS-IBT-IMSS-490/2020  | EPI_ISL_1301594 | 06/05/2020 | Baja California Sur | Human | Male   | 37      | Ambulatory   | Original | Nasopharyngeal swab                   |
| hCoV-19/Mexico/CMX-InDRE-IBT-97/2020  | EPI_ISL_1301501 | 07/05/2020 | Mexico City         | Human | Male   | unknown | Deceased     | Original |                                       |
| hCoV-19/Mexico/CMX-INER-IBT-39/2020   | EPI_ISL_1301510 | 07/05/2020 | Mexico City         | Human | Female | unknown | Hospitalized | Original | Nasopharyngeal swab                   |
| hCoV-19/Mexico/CMX-INER-IBT-37/2020   | EPI_ISL_1301471 | 07/05/2020 | Mexico City         | Human | Male   | unknown | Hospitalized | Original | Nasopharyngeal swab                   |
| hCoV-19/Mexico/CMX-INER-IBT-38/2020   | EPI_ISL_1301488 | 07/05/2020 | Mexico City         | Human | Female | unknown | Hospitalized | Original | Nasopharyngeal swab                   |
| hCoV-19/Mexico/CMX-INER-IBT-36/2020   | EPI_ISL_1301722 | 07/05/2020 | Mexico City         | Human | Male   | unknown | Hospitalized | Original | Pharyngeal swab                       |
| hCoV-19/Mexico/CMX-IBT-IMSS-492/2020  | EPI_ISL_1301668 | 08/05/2020 | Mexico City         | Human | Female | 13      | Hospitalized | Original | Nasopharyngeal and oropharyngeal swab |
| hCoV-19/Mexico/CAM-InDRE-IBT-48/2020  | EPI_ISL_1301687 | 08/05/2020 | Campeche            | Human | Male   | 33      | Ambulatory   | Original | Pharyngeal swab                       |
| hCoV-19/Mexico/CMX-INER-IBT-40/2020   | EPI_ISL_1301445 | 08/05/2020 | Mexico City         | Human | Female | unknown | Hospitalized | Original | Nasopharyngeal swab                   |
| hCoV-19/Mexico/CHH-IBT-IMSS-497/2020  | EPI_ISL_1301716 | 08/05/2020 | Chihuahua           | Human | Female | 23      | Ambulatory   | Original | Pharyngeal swab                       |



|                                       |                 |            |                     |       |        |         |              |          |                                       |
|---------------------------------------|-----------------|------------|---------------------|-------|--------|---------|--------------|----------|---------------------------------------|
| hCoV-19/Mexico/CMX-INER-IBT-41/2020   | EPI_ISL_1301533 | 09/05/2020 | Mexico City         | Human | Male   | unknown | Hospitalized | Original | Pharyngeal swab                       |
| hCoV-19/Mexico/CMX-INER-IBT-44/2020   | EPI_ISL_1301615 | 09/05/2020 | Mexico City         | Human | Female | unknown | Hospitalized | Original | Nasopharyngeal swab                   |
| hCoV-19/Mexico/MOR-IBT-IMSS-496/2020  | EPI_ISL_1301595 | 11/05/2020 | Morelos             | Human | Male   | 42      | Ambulatory   | Original | Nasopharyngeal swab                   |
| hCoV-19/Mexico/CMX-INER-IBT-45/2020   | EPI_ISL_1301616 | 11/05/2020 | Mexico City         | Human | Male   | unknown | Hospitalized | Original | Nasopharyngeal swab                   |
| hCoV-19/Mexico/GUA-IBT-IMSS-498/2020  | EPI_ISL_1301468 | 11/05/2020 | Guanajuato          | Human | Male   | 50      | Hospitalized | Original | Nasopharyngeal and oropharyngeal swab |
| hCoV-19/Mexico/CMX-INER-IBT-46/2020   | EPI_ISL_1301504 | 12/05/2020 | Mexico City         | Human | Male   | unknown | Hospitalized | Original | Pharyngeal swab                       |
| hCoV-19/Mexico/BCS-IBT-IMSS-499/2020  | EPI_ISL_1301596 | 12/05/2020 | Baja California Sur | Human | Female | 41      | Ambulatory   | Original | Nasopharyngeal swab                   |
| hCoV-19/Mexico/MOR-InDRE-IBT-7/2020   | EPI_ISL_1301480 | 12/05/2020 | Morelos             | Human | Male   | 31      | Deceased     | Original | Pharyngeal swab                       |
| hCoV-19/Mexico/CMX-INER-IBT-47/2020   | EPI_ISL_1301723 | 12/05/2020 | Mexico City         | Human | Female | unknown | Hospitalized | Original | Pharyngeal swab                       |
| hCoV-19/Mexico/COL-IBT-IMSS-500/2020  | EPI_ISL_1301516 | 13/05/2020 | Colima              | Human | Male   | 76      | Hospitalized | Original | Nasopharyngeal and oropharyngeal swab |
| hCoV-19/Mexico/CMX-INER-IBT-49/2020   | EPI_ISL_1301617 | 13/05/2020 | Mexico City         | Human | Male   | unknown | Hospitalized | Original | Nasopharyngeal swab                   |
| hCoV-19/Mexico/CMX-INER-IBT-48/2020   | EPI_ISL_1301724 | 13/05/2020 | Mexico City         | Human | Male   | unknown | Hospitalized | Original | Pharyngeal swab                       |
| hCoV-19/Mexico/CMX-INER-IBT-50/2020   | EPI_ISL_1301545 | 14/05/2020 | Mexico City         | Human | Male   | unknown | Hospitalized | Original | Pharyngeal swab                       |
| hCoV-19/Mexico/GRO-IBT-IMSS-502/2020  | EPI_ISL_1301671 | 14/05/2020 | Guerrero            | Human | Female | 49      | Ambulatory   | Original | Nasopharyngeal and oropharyngeal swab |
| hCoV-19/Mexico/COL-IBT-IMSS-501/2020  | EPI_ISL_1301518 | 15/05/2020 | Colima              | Human | Male   | 41      | Ambulatory   | Original | Nasopharyngeal and oropharyngeal swab |
| hCoV-19/Mexico/GRO-IBT-IMSS-504/2020  | EPI_ISL_1301536 | 15/05/2020 | Guerrero            | Human | Male   | 39      | Ambulatory   | Original | Nasopharyngeal and oropharyngeal swab |
| hCoV-19/Mexico/GRO-IBT-IMSS-503/2020  | EPI_ISL_1301553 | 15/05/2020 | Guerrero            | Human | Female | 31      | Ambulatory   | Original | Pharyngeal swab                       |
| hCoV-19/Mexico/GRO-InDRE-IBT-95/2020  | EPI_ISL_1301458 | 15/05/2020 | Guerrero            | Human | Male   | 79      | Hospitalized | Original | Pharyngeal swab                       |
| hCoV-19/Mexico/CMX-IBT-IMSS-505/2020  | EPI_ISL_1301672 | 16/05/2020 | Mexico City         | Human | Female | 9       | Hospitalized | Original | Nasopharyngeal and oropharyngeal swab |
| hCoV-19/Mexico/HID-IBT-IMSS-506/2020  | EPI_ISL_1301463 | 16/05/2020 | Hidalgo             | Human | Female | 24      | Ambulatory   | Original | Nasopharyngeal and oropharyngeal swab |
| hCoV-19/Mexico/QUE-IBT-IMSS-507/2020  | EPI_ISL_1301673 | 17/05/2020 | Queretaro           | Human | Female | 30      | Ambulatory   | Original | Nasopharyngeal and oropharyngeal swab |
| hCoV-19/Mexico/VER-IBT-IMSS-512/2020  | EPI_ISL_1301677 | 17/05/2020 | Veracruz            | Human | Male   | 41      | Hospitalized | Original | Nasopharyngeal and oropharyngeal swab |
| hCoV-19/Mexico/VER-IBT-IMSS-513/2020  | EPI_ISL_1301678 | 17/05/2020 | Veracruz            | Human | Female | 68      | Hospitalized | Original | Nasopharyngeal and oropharyngeal swab |
| hCoV-19/Mexico/CMX-INER-IBT-51/2020   | EPI_ISL_1301725 | 17/05/2020 | Mexico City         | Human | Female | unknown | Hospitalized | Original | Pharyngeal swab                       |
| hCoV-19/Mexico/BCS-IBT-IMSS-509/2020  | EPI_ISL_1301597 | 18/05/2020 | Baja California Sur | Human | Female | 34      | Ambulatory   | Original | Nasopharyngeal swab                   |
| hCoV-19/Mexico/CMX-INER-IBT-52/2020   | EPI_ISL_1301618 | 18/05/2020 | Mexico City         | Human | Male   | unknown | Hospitalized | Original | Nasopharyngeal swab                   |
| hCoV-19/Mexico/HID-IBT-IMSS-508/2020  | EPI_ISL_1301674 | 18/05/2020 | Hidalgo             | Human | Female | 41      | Ambulatory   | Original | Nasopharyngeal and oropharyngeal swab |
| hCoV-19/Mexico/QUE-IBT-IMSS-510/2020  | EPI_ISL_1301675 | 18/05/2020 | Queretaro           | Human | Female | 48      | Ambulatory   | Original | Nasopharyngeal and oropharyngeal swab |
| hCoV-19/Mexico/CMX-INER-IBT-53/2020   | EPI_ISL_1301726 | 18/05/2020 | Mexico City         | Human | Female | unknown | Hospitalized | Original | Pharyngeal swab                       |
| hCoV-19/Mexico/VER-IBT-IMSS-511/2020  | EPI_ISL_1301676 | 19/05/2020 | Veracruz            | Human | Female | 66      | Hospitalized | Original | Nasopharyngeal and oropharyngeal swab |
| hCoV-19/Mexico/GRO-InDRE-IBT-94/2020  | EPI_ISL_1301487 | 19/05/2020 | Guerrero            | Human | Female | 28      | Hospitalized | Original | Pharyngeal swab                       |
| hCoV-19/Mexico/CMX-INER-IBT-54/2020   | EPI_ISL_1301507 | 20/05/2020 | Mexico City         | Human | Female | unknown | Hospitalized | Original | Pharyngeal swab                       |
| hCoV-19/Mexico/CMX-INER-IBT-55/2020   | EPI_ISL_1301551 | 20/05/2020 | Mexico City         | Human | Male   | unknown | Hospitalized | Original | Pharyngeal swab                       |
| hCoV-19/Mexico/CMX-INER-IBT-56/2020   | EPI_ISL_1301732 | 20/05/2020 | Mexico City         | Human | Male   | unknown | Hospitalized | Original | Tracheal aspirate                     |
| hCoV-19/Mexico/CMX-INER-IBT-60/2020   | EPI_ISL_1301554 | 22/05/2020 | Mexico City         | Human | Male   | unknown | Hospitalized | Original | Pharyngeal swab                       |
| hCoV-19/Mexico/CMX-INER-IBT-62/2020   | EPI_ISL_1301619 | 22/05/2020 | Mexico City         | Human | Female | unknown | Hospitalized | Original | Nasopharyngeal swab                   |
| hCoV-19/Mexico/CMX-INER-IBT-58/2020   | EPI_ISL_1301727 | 22/05/2020 | Mexico City         | Human | Female | unknown | Hospitalized | Original | Pharyngeal swab                       |
| hCoV-19/Mexico/CMX-INER-IBT-59/2020   | EPI_ISL_1301506 | 23/05/2020 | Mexico City         | Human | Female | unknown | Hospitalized | Original | Nasopharyngeal swab                   |
| hCoV-19/Mexico/CMX-INER-IBT-61/2020   | EPI_ISL_1301728 | 23/05/2020 | Mexico City         | Human | Female | unknown | Hospitalized | Original | Pharyngeal swab                       |
| hCoV-19/Mexico/CMX-INER-IBT-57/2020   | EPI_ISL_1301733 | 23/05/2020 | Mexico City         | Human | Female | unknown | Hospitalized | Original | Tracheal aspirate                     |
| hCoV-19/Mexico/SON-InDRE-IBT-106/2020 | EPI_ISL_1301513 | 25/05/2020 | Sonora              | Human | Male   | 60      | Ambulatory   | Original | Pharyngeal swab                       |

|                                       |                 |            |                     |       |        |         |              |          |                                       |
|---------------------------------------|-----------------|------------|---------------------|-------|--------|---------|--------------|----------|---------------------------------------|
| hCoV-19/Mexico/ZAC-InDRE-IBT-51/2020  | EPI_ISL_1301469 | 25/05/2020 | Zacatecas           | Human | Male   | 40      | Hospitalized | Original | Pharyngeal swab                       |
| hCoV-19/Mexico/ZAC-InDRE-IBT-52/2020  | EPI_ISL_1301491 | 25/05/2020 | Zacatecas           | Human | Male   | 54      | Hospitalized | Original | Pharyngeal swab                       |
| hCoV-19/Mexico/CMX-INER-IBT-63/2020   | EPI_ISL_1301729 | 25/05/2020 | Mexico City         | Human | Male   | unknown | Hospitalized | Original | Pharyngeal swab                       |
| hCoV-19/Mexico/CMX-INER-IBT-31/2020   | EPI_ISL_1301602 | 26/05/2020 | Mexico City         | Human | Female | unknown | Hospitalized | Original | Nasopharyngeal swab                   |
| hCoV-19/Mexico/CMX-INER-IBT-32/2020   | EPI_ISL_1301603 | 26/05/2020 | Mexico City         | Human | Male   | unknown | Hospitalized | Original | Nasopharyngeal swab                   |
| hCoV-19/Mexico/CMX-INER-IBT-30/2020   | EPI_ISL_1301472 | 26/05/2020 | Mexico City         | Human | Male   | unknown | Hospitalized | Original | Tracheal aspirate                     |
| hCoV-19/Mexico/CMX-INER-IBT-33/2020   | EPI_ISL_1301604 | 27/05/2020 | Mexico City         | Human | Male   | unknown | Hospitalized | Original | Nasopharyngeal swab                   |
| hCoV-19/Mexico/TAB-InDRE-IBT-31/2020  | EPI_ISL_1301537 | 29/05/2020 | Tabasco             | Human | Male   | unknown | Hospitalized | Original | Nasopharyngeal swab                   |
| hCoV-19/Mexico/TAB-InDRE-IBT-29/2020  | EPI_ISL_1301444 | 29/05/2020 | Tabasco             | Human | Male   | unknown | Hospitalized | Original | Pharyngeal swab                       |
| hCoV-19/Mexico/TAB-InDRE-IBT-30/2020  | EPI_ISL_1301701 | 29/05/2020 | Tabasco             | Human | Male   | unknown | Hospitalized | Original | Pharyngeal swab                       |
| hCoV-19/Mexico/TAB-InDRE-IBT-28/2020  | EPI_ISL_1301700 | 30/05/2020 | Tabasco             | Human | Male   | unknown | Hospitalized | Original | Pharyngeal swab                       |
| hCoV-19/Mexico/MOR-InDRE-IBT-98/2020  | EPI_ISL_1301478 | 31/05/2020 | Morelos             | Human | Male   | 26      | Hospitalized | Original | Pharyngeal swab                       |
| hCoV-19/Mexico/CHH-InDRE-IBT-89/2020  | EPI_ISL_1301705 | 31/05/2020 | Chihuahua           | Human | Female | 38      | Ambulatory   | Original | Pharyngeal swab                       |
| hCoV-19/Mexico/BCN-InDRE-IBT-3/2020   | EPI_ISL_1301532 | 01/06/2020 | Baja California     | Human | Female | 70      | Deceased     | Original | Pharyngeal swab                       |
| hCoV-19/Mexico/TLA-InDRE-IBT-70/2020  | EPI_ISL_1301546 | 01/06/2020 | Tlaxcala            | Human | Female | 53      | Hospitalized | Original |                                       |
| hCoV-19/Mexico/BCS-InDRE-IBT-62/2020  | EPI_ISL_1301555 | 01/06/2020 | Baja California Sur | Human | Male   | 35      | Hospitalized | Original |                                       |
| hCoV-19/Mexico/TLA-InDRE-IBT-68/2020  | EPI_ISL_1301556 | 01/06/2020 | Tlaxcala            | Human | Male   | 25      | Ambulatory   | Original |                                       |
| hCoV-19/Mexico/TLA-InDRE-IBT-69/2020  | EPI_ISL_1301557 | 01/06/2020 | Tlaxcala            | Human | Male   | 41      | Ambulatory   | Original |                                       |
| hCoV-19/Mexico/NAY-InDRE-IBT-80/2020  | EPI_ISL_1301559 | 01/06/2020 | Nayarit             | Human | Male   | 71      | Deceased     | Original |                                       |
| hCoV-19/Mexico/BCS-InDRE-IBT-58/2020  | EPI_ISL_1301567 | 01/06/2020 | Baja California Sur | Human | Male   | 40      | Hospitalized | Original | Nasopharyngeal swab                   |
| hCoV-19/Mexico/BCS-InDRE-IBT-63/2020  | EPI_ISL_1301568 | 01/06/2020 | Baja California Sur | Human | Female | 44      | Ambulatory   | Original | Nasopharyngeal swab                   |
| hCoV-19/Mexico/SIN-InDRE-IBT-88/2020  | EPI_ISL_1301573 | 01/06/2020 | Sinaloa             | Human | Female | 79      | Ambulatory   | Original | Nasopharyngeal swab                   |
| hCoV-19/Mexico/BCN-InDRE-IBT-5/2020   | EPI_ISL_1301695 | 01/06/2020 | Baja California     | Human | Female | 92      | Deceased     | Original | Pharyngeal swab                       |
| hCoV-19/Mexico/BCS-InDRE-IBT-60/2020  | EPI_ISL_1301451 | 01/06/2020 | Baja California Sur | Human | Female | 29      | Ambulatory   | Original | Nasopharyngeal swab                   |
| hCoV-19/Mexico/YUC-InDRE-IBT-64/2020  | EPI_ISL_1301461 | 01/06/2020 | Yucatan             | Human | Female | 55      | Ambulatory   | Original | Nasopharyngeal swab                   |
| hCoV-19/Mexico/ZAC-InDRE-IBT-59/2020  | EPI_ISL_1301483 | 01/06/2020 | Zacatecas           | Human | Male   | 53      | Ambulatory   | Original | Nasopharyngeal swab                   |
| hCoV-19/Mexico/BCS-InDRE-IBT-61/2020  | EPI_ISL_1301730 | 01/06/2020 | Baja California Sur | Human | Male   | 32      | Ambulatory   | Original | Nasopharyngeal and oropharyngeal swab |
| hCoV-19/Mexico/OAX-InDRE-IBT-15/2020  | EPI_ISL_1301512 | 02/06/2020 | Oaxaca              | Human | Female | 53      | Deceased     | Original | Nasopharyngeal swab                   |
| hCoV-19/Mexico/BCN-InDRE-IBT-2/2020   | EPI_ISL_1301521 | 02/06/2020 | Baja California     | Human | Female | 25      | Ambulatory   | Original | Pharyngeal swab                       |
| hCoV-19/Mexico/QUE-InDRE-IBT-53/2020  | EPI_ISL_1301541 | 02/06/2020 | Queretaro           | Human | Male   | 30      | Hospitalized | Original | Pharyngeal swab                       |
| hCoV-19/Mexico/HID-InDRE-IBT-66/2020  | EPI_ISL_1301549 | 02/06/2020 | Hidalgo             | Human | Male   | 66      | Hospitalized | Original | Pharyngeal swab                       |
| hCoV-19/Mexico/NAY-InDRE-IBT-81/2020  | EPI_ISL_1301560 | 02/06/2020 | Nayarit             | Human | Male   | 27      | Hospitalized | Original |                                       |
| hCoV-19/Mexico/HID-InDRE-IBT-65/2020  | EPI_ISL_1301569 | 02/06/2020 | Hidalgo             | Human | Female | 50      | Deceased     | Original | Nasopharyngeal swab                   |
| hCoV-19/Mexico/ZAC-InDRE-IBT-55/2020  | EPI_ISL_1301688 | 02/06/2020 | Zacatecas           | Human | Female | 36      | Ambulatory   | Original | Pharyngeal swab                       |
| hCoV-19/Mexico/ZAC-InDRE-IBT-56/2020  | EPI_ISL_1301689 | 02/06/2020 | Zacatecas           | Human | Male   | 73      | Deceased     | Original | Pharyngeal swab                       |
| hCoV-19/Mexico/ROO-InDRE-IBT-11/2020  | EPI_ISL_1301696 | 02/06/2020 | Quintana Roo        | Human | Female | 55      | Deceased     | Original | Pharyngeal swab                       |
| hCoV-19/Mexico/ROO-InDRE-IBT-12/2020  | EPI_ISL_1301486 | 02/06/2020 | Quintana Roo        | Human | Male   | 41      | Deceased     | Original | Pharyngeal swab                       |
| hCoV-19/Mexico/ROO-InDRE-IBT-10/2020  | EPI_ISL_1301493 | 02/06/2020 | Quintana Roo        | Human | Female | 49      | Ambulatory   | Original | Pharyngeal swab                       |
| hCoV-19/Mexico/BCN-InDRE-IBT-1/2020   | EPI_ISL_1301495 | 02/06/2020 | Baja California     | Human | Female | unknown | Ambulatory   | Original | Pharyngeal swab                       |
| hCoV-19/Mexico/COA-InDRE-IBT-105/2020 | EPI_ISL_1301500 | 03/06/2020 | Coahuila            | Human | Male   | unknown | Ambulatory   | Original | Pharyngeal swab                       |
| hCoV-19/Mexico/ROO-InDRE-IBT-13/2020  | EPI_ISL_1301526 | 03/06/2020 | Quintana Roo        | Human | Male   | 29      | Hospitalized | Original | Pharyngeal swab                       |

|                                       |                 |            |                     |       |         |         |              |          |                     |
|---------------------------------------|-----------------|------------|---------------------|-------|---------|---------|--------------|----------|---------------------|
| hCoV-19/Mexico/QUE-InDRE-IBT-54/2020  | EPI_ISL_1301566 | 03/06/2020 | Queretaro           | Human | Female  | 42      | Deceased     | Original | Nasopharyngeal swab |
| hCoV-19/Mexico/NAY-InDRE-IBT-77/2020  | EPI_ISL_1301694 | 03/06/2020 | Nayarit             | Human | Male    | unknown | unknown      | Original | Pharyngeal swab     |
| hCoV-19/Mexico/GRO-InDRE-IBT-111/2020 | EPI_ISL_1301455 | 03/06/2020 | Guerrero            | Human | unknown | unknown | Deceased     | Original |                     |
| hCoV-19/Mexico/BCS-InDRE-IBT-6/2020   | EPI_ISL_1301460 | 03/06/2020 | Baja California Sur | Human | Female  | 45      | Ambulatory   | Original | Pharyngeal swab     |
| hCoV-19/Mexico/OAX-InDRE-IBT-21/2020  | EPI_ISL_1301502 | 04/06/2020 | Oaxaca              | Human | Male    | 71      | Hospitalized | Original | Pharyngeal swab     |
| hCoV-19/Mexico/ROO-InDRE-IBT-14/2020  | EPI_ISL_1301505 | 04/06/2020 | Quintana Roo        | Human | Male    | 65      | Deceased     | Original | Pharyngeal swab     |
| hCoV-19/Mexico/GRO-InDRE-IBT-110/2020 | EPI_ISL_1301508 | 04/06/2020 | Guerrero            | Human | Female  | unknown | Hospitalized | Original | Pharyngeal swab     |
| hCoV-19/Mexico/GUA-InDRE-IBT-99/2020  | EPI_ISL_1301511 | 04/06/2020 | Guanajuato          | Human | Female  | 77      | Hospitalized | Original | Pharyngeal swab     |
| hCoV-19/Mexico/CAM-InDRE-IBT-33/2020  | EPI_ISL_1301527 | 04/06/2020 | Campeche            | Human | Female  | 35      | Ambulatory   | Original | Pharyngeal swab     |
| hCoV-19/Mexico/NAY-InDRE-IBT-79/2020  | EPI_ISL_1301534 | 04/06/2020 | Nayarit             | Human | Female  | 49      | Ambulatory   | Original |                     |
| hCoV-19/Mexico/GUA-InDRE-IBT-101/2020 | EPI_ISL_1301548 | 04/06/2020 | Guanajuato          | Human | Female  | 17      | Ambulatory   | Original | Pharyngeal swab     |
| hCoV-19/Mexico/TLA-InDRE-IBT-71/2020  | EPI_ISL_1301558 | 04/06/2020 | Tlaxcala            | Human | Female  | unknown | Hospitalized | Original |                     |
| hCoV-19/Mexico/CHP-InDRE-IBT-84/2020  | EPI_ISL_1301570 | 04/06/2020 | Chiapas             | Human | Male    | 46      | Deceased     | Original | Nasopharyngeal swab |
| hCoV-19/Mexico/OAX-InDRE-IBT-17/2020  | EPI_ISL_1301697 | 04/06/2020 | Oaxaca              | Human | Female  | 46      | Ambulatory   | Original | Pharyngeal swab     |
| hCoV-19/Mexico/OAX-InDRE-IBT-19/2020  | EPI_ISL_1301698 | 04/06/2020 | Oaxaca              | Human | Male    | 56      | Hospitalized | Original | Pharyngeal swab     |
| hCoV-19/Mexico/YUC-InDRE-IBT-8/2020   | EPI_ISL_1301449 | 04/06/2020 | Yucatan             | Human | Male    | 24      | Ambulatory   | Original | Pharyngeal swab     |
| hCoV-19/Mexico/CAM-InDRE-IBT-34/2020  | EPI_ISL_1301457 | 04/06/2020 | Campeche            | Human | Male    | 44      | Ambulatory   | Original | Pharyngeal swab     |
| hCoV-19/Mexico/BCN-InDRE-IBT-4/2020   | EPI_ISL_1301470 | 04/06/2020 | Baja California     | Human | Female  | 83      | Deceased     | Original | Pharyngeal swab     |
| hCoV-19/Mexico/HID-InDRE-IBT-67/2020  | EPI_ISL_1301476 | 04/06/2020 | Hidalgo             | Human | Male    | 25      | Ambulatory   | Original | Nasopharyngeal swab |
| hCoV-19/Mexico/OAX-InDRE-IBT-20/2020  | EPI_ISL_1301492 | 04/06/2020 | Oaxaca              | Human | Female  | 38      | Hospitalized | Original | Pharyngeal swab     |
| hCoV-19/Mexico/CAM-InDRE-IBT-35/2020  | EPI_ISL_1301702 | 04/06/2020 | Campeche            | Human | Female  | 30      | Ambulatory   | Original | Pharyngeal swab     |
| hCoV-19/Mexico/CAM-InDRE-IBT-36/2020  | EPI_ISL_1301703 | 04/06/2020 | Campeche            | Human | Male    | 50      | Ambulatory   | Original | Pharyngeal swab     |
| hCoV-19/Mexico/CAM-InDRE-IBT-37/2020  | EPI_ISL_1301704 | 04/06/2020 | Campeche            | Human | Male    | 52      | Ambulatory   | Original | Pharyngeal swab     |
| hCoV-19/Mexico/GUA-InDRE-IBT-100/2020 | EPI_ISL_1301707 | 04/06/2020 | Guanajuato          | Human | Male    | 57      | Ambulatory   | Original | Pharyngeal swab     |
| hCoV-19/Mexico/SIN-InDRE-IBT-24/2020  | EPI_ISL_1301543 | 05/06/2020 | Sinaloa             | Human | Female  | 57      | Hospitalized | Original |                     |
| hCoV-19/Mexico/SIN-InDRE-IBT-26/2020  | EPI_ISL_1301544 | 05/06/2020 | Sinaloa             | Human | Male    | 49      | Hospitalized | Original |                     |
| hCoV-19/Mexico/CHP-InDRE-IBT-83/2020  | EPI_ISL_1301562 | 05/06/2020 | Chiapas             | Human | Male    | 54      | Ambulatory   | Original |                     |
| hCoV-19/Mexico/CHP-InDRE-IBT-85/2020  | EPI_ISL_1301571 | 05/06/2020 | Chiapas             | Human | Female  | 71      | Ambulatory   | Original | Nasopharyngeal swab |
| hCoV-19/Mexico/SIN-InDRE-IBT-27/2020  | EPI_ISL_1301699 | 05/06/2020 | Sinaloa             | Human | Male    | 73      | Deceased     | Original | Pharyngeal swab     |
| hCoV-19/Mexico/OAX-InDRE-IBT-22/2020  | EPI_ISL_1301474 | 05/06/2020 | Oaxaca              | Human | Female  | 29      | Ambulatory   | Original |                     |
| hCoV-19/Mexico/YUC-InDRE-IBT-9/2020   | EPI_ISL_1301479 | 05/06/2020 | Yucatan             | Human | Female  | unknown | unknown      | Original | Pharyngeal swab     |
| hCoV-19/Mexico/GUA-InDRE-IBT-102/2020 | EPI_ISL_1301708 | 05/06/2020 | Guanajuato          | Human | Female  | 26      | Ambulatory   | Original | Pharyngeal swab     |
| hCoV-19/Mexico/SON-InDRE-IBT-91/2020  | EPI_ISL_1301565 | 06/06/2020 | Sonora              | Human | Male    | 57      | Hospitalized | Original | Bronchial swab      |
| hCoV-19/Mexico/CHP-InDRE-IBT-86/2020  | EPI_ISL_1301572 | 06/06/2020 | Chiapas             | Human | Male    | 83      | Hospitalized | Original | Nasopharyngeal swab |
| hCoV-19/Mexico/GRO-InDRE-IBT-117/2020 | EPI_ISL_1301585 | 06/06/2020 | Guerrero            | Human | Male    | 47      | Ambulatory   | Original | Nasopharyngeal swab |
| hCoV-19/Mexico/TLA-InDRE-IBT-72/2020  | EPI_ISL_1301691 | 06/06/2020 | Tlaxcala            | Human | Female  | 64      | Deceased     | Original | Pharyngeal swab     |
| hCoV-19/Mexico/TLA-InDRE-IBT-73/2020  | EPI_ISL_1301692 | 06/06/2020 | Tlaxcala            | Human | Male    | 60      | Deceased     | Original | Pharyngeal swab     |
| hCoV-19/Mexico/CHP-InDRE-IBT-87/2020  | EPI_ISL_1301448 | 06/06/2020 | Chiapas             | Human | Female  | 57      | Hospitalized | Original | Nasopharyngeal swab |
| hCoV-19/Mexico/SON-InDRE-IBT-90/2020  | EPI_ISL_1301464 | 06/06/2020 | Sonora              | Human | Female  | 31      | Ambulatory   | Original | Pharyngeal swab     |
| hCoV-19/Mexico/GUA-InDRE-IBT-103/2020 | EPI_ISL_1301485 | 06/06/2020 | Guanajuato          | Human | Male    | 36      | Ambulatory   | Original | Pharyngeal swab     |
| hCoV-19/Mexico/SON-InDRE-IBT-93/2020  | EPI_ISL_1301706 | 06/06/2020 | Sonora              | Human | Female  | 80      | Deceased     | Original | Pharyngeal swab     |

|                                       |                 |            |             |       |        |         |              |          |                                       |
|---------------------------------------|-----------------|------------|-------------|-------|--------|---------|--------------|----------|---------------------------------------|
| hCoV-19/Mexico/TLA-InDRE-IBT-74/2020  | EPI_ISL_1301542 | 07/06/2020 | Tlaxcala    | Human | Female | 55      | Hospitalized | Original | Pharyngeal swab                       |
| hCoV-19/Mexico/NAY-InDRE-IBT-82/2020  | EPI_ISL_1301561 | 07/06/2020 | Nayarit     | Human | Male   | 75      | Hospitalized | Original | Pharyngeal swab                       |
| hCoV-19/Mexico/SON-InDRE-IBT-92/2020  | EPI_ISL_1301517 | 08/06/2020 | Sonora      | Human | Female | 78      | Ambulatory   | Original |                                       |
| hCoV-19/Mexico/TLA-InDRE-IBT-75/2020  | EPI_ISL_1301531 | 08/06/2020 | Tlaxcala    | Human | Male   | 68      | Hospitalized | Original | Pharyngeal swab                       |
| hCoV-19/Mexico/GRO-InDRE-IBT-130/2020 | EPI_ISL_1301547 | 08/06/2020 | Guerrero    | Human | Male   | 34      | Ambulatory   | Original | Nasopharyngeal swab                   |
| hCoV-19/Mexico/GRO-InDRE-IBT-129/2020 | EPI_ISL_1301589 | 08/06/2020 | Guerrero    | Human | Male   | 41      | Ambulatory   | Original | Nasopharyngeal swab                   |
| hCoV-19/Mexico/TLA-InDRE-IBT-76/2020  | EPI_ISL_1301693 | 08/06/2020 | Tlaxcala    | Human | Male   | 82      | Ambulatory   | Original | Pharyngeal swab                       |
| hCoV-19/Mexico/SIN-InDRE-IBT-25/2020  | EPI_ISL_1301459 | 08/06/2020 | Sinaloa     | Human | Female | 56      | Deceased     | Original | Nasopharyngeal swab                   |
| hCoV-19/Mexico/DUR-InDRE-IBT-108/2020 | EPI_ISL_1301475 | 08/06/2020 | Durango     | Human | Female | 32      | Ambulatory   | Original | Nasopharyngeal swab                   |
| hCoV-19/Mexico/CMX-InDRE-IBT-39/2020  | EPI_ISL_1301477 | 09/06/2020 | Mexico City | Human | Male   | 58      | Hospitalized | Original | Pharyngeal swab                       |
| hCoV-19/Mexico/CMX-InDRE-IBT-38/2020  | EPI_ISL_1301497 | 09/06/2020 | Mexico City | Human | Male   | 50      | Hospitalized | Original | Pharyngeal swab                       |
| hCoV-19/Mexico/GRO-InDRE-IBT-132/2020 | EPI_ISL_1301523 | 10/06/2020 | Guerrero    | Human | Male   | 48      | Ambulatory   | Original | Nasopharyngeal swab                   |
| hCoV-19/Mexico/GRO-InDRE-IBT-131/2020 | EPI_ISL_1301590 | 10/06/2020 | Guerrero    | Human | Female | 37      | Ambulatory   | Original | Nasopharyngeal swab                   |
| hCoV-19/Mexico/GRO-InDRE-IBT-107/2020 | EPI_ISL_1301574 | 25/06/2020 | Guerrero    | Human | Male   | 40      | Ambulatory   | Original | Nasopharyngeal swab                   |
| hCoV-19/Mexico/SIN-InDRE-IBT-23/2020  | EPI_ISL_1301563 | 26/06/2020 | Sinaloa     | Human | Male   | 38      | Ambulatory   | Original | Pharyngeal swab                       |
| hCoV-19/Mexico/VER-InDRE-IBT-96/2020  | EPI_ISL_1301514 | 27/06/2020 | Veracruz    | Human | Female | 39      | Ambulatory   | Original |                                       |
| hCoV-19/Mexico/CHH-InDRE-IBT-104/2020 | EPI_ISL_1301481 | 03/07/2020 | Chihuahua   | Human | Male   | 36      | Ambulatory   | Original | Pharyngeal swab                       |
| hCoV-19/Mexico/COL-InDRE-IBT-136/2020 | EPI_ISL_1301564 | 07/07/2020 | Colima      | Human | Female | unknown | unknown      | Original | Pharyngeal swab                       |
| hCoV-19/Mexico/COL-InDRE-IBT-137/2020 | EPI_ISL_1301482 | 08/07/2020 | Colima      | Human | Female | unknown | unknown      | Original |                                       |
| hCoV-19/Mexico/JAL-InDRE-IBT-138/2020 | EPI_ISL_1301710 | 11/07/2020 | Jalisco     | Human | Female | unknown | unknown      | Original | Pharyngeal swab                       |
| hCoV-19/Mexico/CMX-InDRE-IBT-126/2020 | EPI_ISL_1301586 | 16/07/2020 | Mexico City | Human | Female | unknown | Ambulatory   | Original | Nasopharyngeal swab                   |
| hCoV-19/Mexico/CMX-InDRE-IBT-127/2020 | EPI_ISL_1301587 | 20/07/2020 | Mexico City | Human | Female | 34      | Ambulatory   | Original | Nasopharyngeal swab                   |
| hCoV-19/Mexico/JAL-InDRE-IBT-142/2020 | EPI_ISL_1301713 | 30/07/2020 | Jalisco     | Human | Female | 75      | Hospitalized | Original | Pharyngeal swab                       |
| hCoV-19/Mexico/JAL-InDRE-IBT-139/2020 | EPI_ISL_1301711 | 01/08/2020 | Jalisco     | Human | Female | 47      | Ambulatory   | Original | Pharyngeal swab                       |
| hCoV-19/Mexico/JAL-InDRE-IBT-140/2020 | EPI_ISL_1301712 | 02/08/2020 | Jalisco     | Human | Female | 31      | Ambulatory   | Original | Pharyngeal swab                       |
| hCoV-19/Mexico/JAL-InDRE-IBT-143/2020 | EPI_ISL_1301592 | 03/08/2020 | Jalisco     | Human | Male   | 46      | Ambulatory   | Original | Nasopharyngeal swab                   |
| hCoV-19/Mexico/JAL-InDRE-IBT-141/2020 | EPI_ISL_1301454 | 03/08/2020 | Jalisco     | Human | Male   | 39      | Ambulatory   | Original | Pharyngeal swab                       |
| hCoV-19/Mexico/CMX-INER-IBT-134/2020  | EPI_ISL_1302229 | 04/08/2020 | Mexico City | Human | Female | unknown | Hospitalized | Original | Nasopharyngeal and oropharyngeal swab |
| hCoV-19/Mexico/CMX-INER-IBT-135/2020  | EPI_ISL_1302328 | 04/08/2020 | Mexico City | Human | Female | unknown | Hospitalized | Original | Nasopharyngeal and oropharyngeal swab |
| hCoV-19/Mexico/CMX-INER-IBT-136/2020  | EPI_ISL_1302280 | 06/08/2020 | Mexico City | Human | Female | unknown | Hospitalized | Original | Nasopharyngeal and oropharyngeal swab |
| hCoV-19/Mexico/CMX-INER-IBT-138/2020  | EPI_ISL_1302155 | 07/08/2020 | Mexico City | Human | Male   | unknown | Hospitalized | Original | Nasopharyngeal and oropharyngeal swab |
| hCoV-19/Mexico/CMX-INER-IBT-137/2020  | EPI_ISL_1302291 | 08/08/2020 | Mexico City | Human | Female | unknown | Hospitalized | Original | Nasopharyngeal and oropharyngeal swab |
| hCoV-19/Mexico/CMX-INER-IBT-139/2020  | EPI_ISL_1302271 | 10/08/2020 | Mexico City | Human | Female | unknown | Hospitalized | Original | Pharyngeal swab                       |
| hCoV-19/Mexico/CMX-InDRE-IBT-128/2020 | EPI_ISL_1301588 | 14/08/2020 | Mexico City | Human | Male   | 39      | Ambulatory   | Original | Nasopharyngeal swab                   |
| hCoV-19/Mexico/CMX-INER-IBT-140/2020  | EPI_ISL_1302338 | 14/08/2020 | Mexico City | Human | Female | unknown | Hospitalized | Original | Nasopharyngeal and oropharyngeal swab |
| hCoV-19/Mexico/CMX-INER-IBT-141/2020  | EPI_ISL_1302160 | 16/08/2020 | Mexico City | Human | Male   | unknown | Hospitalized | Original | Nasopharyngeal and oropharyngeal swab |
| hCoV-19/Mexico/CMX-INER-IBT-142/2020  | EPI_ISL_1302185 | 18/08/2020 | Mexico City | Human | Female | unknown | Hospitalized | Original | Pharyngeal swab                       |
| hCoV-19/Mexico/CMX-INER-IBT-143/2020  | EPI_ISL_1302312 | 20/08/2020 | Mexico City | Human | Female | unknown | Hospitalized | Original | Pharyngeal swab                       |
| hCoV-19/Mexico/CMX-INER-IBT-144/2020  | EPI_ISL_1302303 | 26/08/2020 | Mexico City | Human | Female | unknown | Hospitalized | Original | Nasopharyngeal and oropharyngeal swab |
| hCoV-19/Mexico/CMX-INER-IBT-145/2020  | EPI_ISL_1302277 | 29/08/2020 | Mexico City | Human | Male   | unknown | Hospitalized | Original | Nasopharyngeal and oropharyngeal swab |
| hCoV-19/Mexico/CMX-INER-IBT-146/2020  | EPI_ISL_1302381 | 02/09/2020 | Mexico City | Human | Male   | unknown | Hospitalized | Original | Pharyngeal swab                       |



|                                      |                 |            |             |       |        |         |              |          |                                       |
|--------------------------------------|-----------------|------------|-------------|-------|--------|---------|--------------|----------|---------------------------------------|
| hCoV-19/Mexico/CMX-INER-IBT-148/2020 | EPI_ISL_1302205 | 04/09/2020 | Mexico City | Human | Female | unknown | Hospitalized | Original | Pharyngeal swab                       |
| hCoV-19/Mexico/CMX-INER-IBT-147/2020 | EPI_ISL_1302257 | 07/09/2020 | Mexico City | Human | Female | unknown | Hospitalized | Original | Pharyngeal swab                       |
| hCoV-19/Mexico/CMX-INER-IBT-42/2020  | EPI_ISL_1301539 | 08/09/2020 | Mexico City | Human | Female | unknown | Hospitalized | Original | Nasopharyngeal swab                   |
| hCoV-19/Mexico/CMX-INER-IBT-43/2020  | EPI_ISL_1301453 | 08/09/2020 | Mexico City | Human | Male   | unknown | Hospitalized | Original | Nasopharyngeal swab                   |
| hCoV-19/Mexico/CMX-INER-IBT-149/2020 | EPI_ISL_1302206 | 09/09/2020 | Mexico City | Human | Female | unknown | Hospitalized | Original | Pharyngeal swab                       |
| hCoV-19/Mexico/CMX-INER-IBT-150/2020 | EPI_ISL_1302207 | 10/09/2020 | Mexico City | Human | Male   | unknown | Hospitalized | Original | Pharyngeal swab                       |
| hCoV-19/Mexico/CMX-INER-IBT-151/2020 | EPI_ISL_1302255 | 15/09/2020 | Mexico City | Human | Female | unknown | Hospitalized | Original | Nasopharyngeal and oropharyngeal swab |
| hCoV-19/Mexico/CMX-INER-IBT-152/2020 | EPI_ISL_1302249 | 17/09/2020 | Mexico City | Human | Male   | unknown | Hospitalized | Original | Nasopharyngeal and oropharyngeal swab |
| hCoV-19/Mexico/CMX-INER-IBT-153/2020 | EPI_ISL_1302319 | 21/09/2020 | Mexico City | Human | Female | unknown | Hospitalized | Original | Nasopharyngeal and oropharyngeal swab |
| hCoV-19/Mexico/CMX-INER-IBT-154/2020 | EPI_ISL_1302247 | 24/09/2020 | Mexico City | Human | Male   | unknown | Hospitalized | Original | Pharyngeal swab                       |
| hCoV-19/Mexico/CMX-INER-IBT-155/2020 | EPI_ISL_1302180 | 25/09/2020 | Mexico City | Human | Female | unknown | Hospitalized | Original | Nasopharyngeal and oropharyngeal swab |
| hCoV-19/Mexico/CMX-INER-IBT-156/2020 | EPI_ISL_1302230 | 29/09/2020 | Mexico City | Human | Male   | unknown | Hospitalized | Original | Nasopharyngeal and oropharyngeal swab |
| hCoV-19/Mexico/CMX-INER-IBT-160/2020 | EPI_ISL_1302297 | 30/09/2020 | Mexico City | Human | Female | unknown | Hospitalized | Original | Nasopharyngeal and oropharyngeal swab |
| hCoV-19/Mexico/CMX-INER-IBT-159/2020 | EPI_ISL_1302193 | 01/10/2020 | Mexico City | Human | Female | unknown | Hospitalized | Original | Nasopharyngeal and oropharyngeal swab |
| hCoV-19/Mexico/CMX-INER-IBT-161/2020 | EPI_ISL_1302231 | 02/10/2020 | Mexico City | Human | Male   | unknown | Hospitalized | Original | Nasopharyngeal and oropharyngeal swab |
| hCoV-19/Mexico/CMX-INER-IBT-158/2020 | EPI_ISL_1302152 | 06/10/2020 | Mexico City | Human | Male   | unknown | Hospitalized | Original | Nasopharyngeal and oropharyngeal swab |
| hCoV-19/Mexico/CMX-INER-IBT-157/2020 | EPI_ISL_1302349 | 07/10/2020 | Mexico City | Human | Male   | unknown | Hospitalized | Original | Nasopharyngeal and oropharyngeal swab |
| hCoV-19/Mexico/CMX-INER-IBT-162/2020 | EPI_ISL_1302326 | 09/10/2020 | Mexico City | Human | Male   | unknown | Hospitalized | Original | Pharyngeal swab                       |
| hCoV-19/Mexico/CMX-INER-IBT-163/2020 | EPI_ISL_1302256 | 14/10/2020 | Mexico City | Human | Male   | unknown | Hospitalized | Original | Nasopharyngeal and oropharyngeal swab |
| hCoV-19/Mexico/CMX-INER-IBT-168/2020 | EPI_ISL_1302292 | 15/10/2020 | Mexico City | Human | Female | unknown | Hospitalized | Original | Nasopharyngeal and oropharyngeal swab |
| hCoV-19/Mexico/CMX-INER-IBT-167/2020 | EPI_ISL_1302194 | 17/10/2020 | Mexico City | Human | Male   | unknown | Hospitalized | Original | Nasopharyngeal and oropharyngeal swab |
| hCoV-19/Mexico/CMX-INER-IBT-164/2020 | EPI_ISL_1302298 | 20/10/2020 | Mexico City | Human | Male   | unknown | Hospitalized | Original | Nasopharyngeal and oropharyngeal swab |
| hCoV-19/Mexico/CMX-INER-IBT-165/2020 | EPI_ISL_1302250 | 23/10/2020 | Mexico City | Human | Female | unknown | Hospitalized | Original | Pharyngeal swab                       |
| hCoV-19/Mexico/CMX-INER-IBT-166/2020 | EPI_ISL_1302170 | 24/10/2020 | Mexico City | Human | Male   | unknown | Hospitalized | Original | Nasopharyngeal and oropharyngeal swab |
| hCoV-19/Mexico/CMX-INER-IBT-170/2020 | EPI_ISL_1302246 | 26/10/2020 | Mexico City | Human | Female | unknown | Hospitalized | Original | Nasopharyngeal and oropharyngeal swab |
| hCoV-19/Mexico/CMX-INER-IBT-171/2020 | EPI_ISL_1302208 | 28/10/2020 | Mexico City | Human | Female | unknown | Hospitalized | Original | Pharyngeal swab                       |
| hCoV-19/Mexico/CMX-INER-IBT-169/2020 | EPI_ISL_1302290 | 01/11/2020 | Mexico City | Human | Male   | unknown | Hospitalized | Original | Pharyngeal swab                       |
| hCoV-19/Mexico/CMX-INER-IBT-172/2020 | EPI_ISL_1302329 | 03/11/2020 | Mexico City | Human | Male   | unknown | Hospitalized | Original | Nasopharyngeal and oropharyngeal swab |
| hCoV-19/Mexico/CMX-INER-IBT-174/2020 | EPI_ISL_1302186 | 04/11/2020 | Mexico City | Human | Female | unknown | Hospitalized | Original | Pharyngeal swab                       |
| hCoV-19/Mexico/CMX-INER-IBT-173/2020 | EPI_ISL_1302336 | 10/11/2020 | Mexico City | Human | Male   | unknown | Hospitalized | Original | Nasopharyngeal and oropharyngeal swab |
| hCoV-19/Mexico/CMX-INER-IBT-175/2020 | EPI_ISL_1302339 | 12/11/2020 | Mexico City | Human | Male   | unknown | Hospitalized | Original | Nasopharyngeal and oropharyngeal swab |
| hCoV-19/Mexico/CMX-INER-IBT-66/2020  | EPI_ISL_1302385 | 14/11/2020 | Mexico City | Human | Male   | unknown | Hospitalized | Original | Nasopharyngeal and oropharyngeal swab |
| hCoV-19/Mexico/CMX-INER-IBT-67/2020  | EPI_ISL_1302263 | 15/11/2020 | Mexico City | Human | Male   | unknown | Hospitalized | Original | Nasopharyngeal and oropharyngeal swab |
| hCoV-19/Mexico/CMX-INER-IBT-69/2020  | EPI_ISL_1302365 | 18/11/2020 | Mexico City | Human | Female | unknown | Hospitalized | Original | Nasopharyngeal and oropharyngeal swab |
| hCoV-19/Mexico/CMX-INER-IBT-70/2020  | EPI_ISL_1302369 | 18/11/2020 | Mexico City | Human | Female | unknown | Hospitalized | Original | Nasopharyngeal and oropharyngeal swab |
| hCoV-19/Mexico/CMX-INER-IBT-72/2020  | EPI_ISL_1302253 | 20/11/2020 | Mexico City | Human | Female | unknown | Hospitalized | Original | Nasopharyngeal and oropharyngeal swab |
| hCoV-19/Mexico/CMX-INER-IBT-71/2020  | EPI_ISL_1302301 | 21/11/2020 | Mexico City | Human | Male   | unknown | Hospitalized | Original | Nasopharyngeal and oropharyngeal swab |
| hCoV-19/Mexico/CMX-INER-IBT-74/2020  | EPI_ISL_1302307 | 23/11/2020 | Mexico City | Human | Male   | unknown | Hospitalized | Original | Nasopharyngeal and oropharyngeal swab |
| hCoV-19/Mexico/CMX-INER-IBT-75/2020  | EPI_ISL_1302325 | 23/11/2020 | Mexico City | Human | Female | unknown | Hospitalized | Original | Nasopharyngeal and oropharyngeal swab |
| hCoV-19/Mexico/CMX-INER-IBT-77/2020  | EPI_ISL_1302299 | 24/11/2020 | Mexico City | Human | Female | unknown | Hospitalized | Original | Nasopharyngeal and oropharyngeal swab |
| hCoV-19/Mexico/CMX-INER-IBT-76/2020  | EPI_ISL_1302357 | 24/11/2020 | Mexico City | Human | Male   | unknown | Hospitalized | Original | Nasopharyngeal and oropharyngeal swab |

|                                                       |                                 |                            |                                |       |        |         |              |          |                                       |
|-------------------------------------------------------|---------------------------------|----------------------------|--------------------------------|-------|--------|---------|--------------|----------|---------------------------------------|
| <a href="#">hCoV-19/Mexico/CMX-INER-IBT-81/2020</a>   | <a href="#">EPI_ISL_1302366</a> | <a href="#">24/11/2020</a> | <a href="#">Mexico City</a>    | Human | Male   | unknown | Hospitalized | Original | Nasopharyngeal and oropharyngeal swab |
| <a href="#">hCoV-19/Mexico/CMX-INER-IBT-78/2020</a>   | <a href="#">EPI_ISL_1302171</a> | <a href="#">26/11/2020</a> | <a href="#">Mexico City</a>    | Human | Female | unknown | Hospitalized | Original | Nasopharyngeal and oropharyngeal swab |
| <a href="#">hCoV-19/Mexico/CMX-INER-IBT-80/2020</a>   | <a href="#">EPI_ISL_1302346</a> | <a href="#">27/11/2020</a> | <a href="#">Mexico City</a>    | Human | Female | unknown | Hospitalized | Original | Nasopharyngeal and oropharyngeal swab |
| <a href="#">hCoV-19/Mexico/CMX-INER-IBT-79/2020</a>   | <a href="#">EPI_ISL_1302159</a> | <a href="#">28/11/2020</a> | <a href="#">Mexico City</a>    | Human | Female | unknown | Hospitalized | Original | Nasopharyngeal and oropharyngeal swab |
| <a href="#">hCoV-19/Mexico/CMX-INER-IBT-106/2020</a>  | <a href="#">EPI_ISL_1302377</a> | <a href="#">03/12/2020</a> | <a href="#">Mexico City</a>    | Human | Female | unknown | Hospitalized | Original | Nasopharyngeal and oropharyngeal swab |
| <a href="#">hCoV-19/Mexico/CMX-INER-IBT-102/2020</a>  | <a href="#">EPI_ISL_1302389</a> | <a href="#">03/12/2020</a> | <a href="#">Mexico City</a>    | Human | Male   | unknown | Hospitalized | Original | Nasopharyngeal and oropharyngeal swab |
| <a href="#">hCoV-19/Mexico/CMX-INER-IBT-107/2020</a>  | <a href="#">EPI_ISL_1302191</a> | <a href="#">03/12/2020</a> | <a href="#">Mexico City</a>    | Human | Female | unknown | Hospitalized | Original | Nasopharyngeal and oropharyngeal swab |
| <a href="#">hCoV-19/Mexico/CMX-INER-IBT-96/2020</a>   | <a href="#">EPI_ISL_1302234</a> | <a href="#">04/12/2020</a> | <a href="#">Mexico City</a>    | Human | Female | unknown | Hospitalized | Original | Nasopharyngeal and oropharyngeal swab |
| <a href="#">hCoV-19/Mexico/CMX-INER-IBT-105/2020</a>  | <a href="#">EPI_ISL_1302345</a> | <a href="#">04/12/2020</a> | <a href="#">Mexico City</a>    | Human | Male   | unknown | Hospitalized | Original | Nasopharyngeal and oropharyngeal swab |
| <a href="#">hCoV-19/Mexico/CMX-INER-IBT-100/2020</a>  | <a href="#">EPI_ISL_1302391</a> | <a href="#">04/12/2020</a> | <a href="#">Mexico City</a>    | Human | Male   | unknown | Hospitalized | Original | Nasopharyngeal and oropharyngeal swab |
| <a href="#">hCoV-19/Mexico/CMX-INER-IBT-94/2020</a>   | <a href="#">EPI_ISL_1302394</a> | <a href="#">05/12/2020</a> | <a href="#">Mexico City</a>    | Human | Male   | unknown | Hospitalized | Original | Nasopharyngeal and oropharyngeal swab |
| <a href="#">hCoV-19/Mexico/CMX-INER-IBT-86/2020</a>   | <a href="#">EPI_ISL_1302302</a> | <a href="#">06/12/2020</a> | <a href="#">Mexico City</a>    | Human | Female | unknown | Hospitalized | Original | Nasopharyngeal and oropharyngeal swab |
| <a href="#">hCoV-19/Mexico/CMX-INER-IBT-91/2020</a>   | <a href="#">EPI_ISL_1302232</a> | <a href="#">08/12/2020</a> | <a href="#">Mexico City</a>    | Human | Female | unknown | Hospitalized | Original | Nasopharyngeal and oropharyngeal swab |
| <a href="#">hCoV-19/Mexico/CMX-INER-IBT-95/2020</a>   | <a href="#">EPI_ISL_1302233</a> | <a href="#">08/12/2020</a> | <a href="#">Mexico City</a>    | Human | Female | unknown | Hospitalized | Original | Nasopharyngeal and oropharyngeal swab |
| <a href="#">hCoV-19/Mexico/CMX-INER-IBT-83/2020</a>   | <a href="#">EPI_ISL_1302317</a> | <a href="#">08/12/2020</a> | <a href="#">Mexico City</a>    | Human | Female | unknown | Hospitalized | Original | Nasopharyngeal and oropharyngeal swab |
| <a href="#">hCoV-19/Mexico/CMX-INER-IBT-85/2020</a>   | <a href="#">EPI_ISL_1302320</a> | <a href="#">08/12/2020</a> | <a href="#">Mexico City</a>    | Human | Male   | unknown | Hospitalized | Original | Nasopharyngeal and oropharyngeal swab |
| <a href="#">hCoV-19/Mexico/CMX-INER-IBT-92/2020</a>   | <a href="#">EPI_ISL_1302330</a> | <a href="#">08/12/2020</a> | <a href="#">Mexico City</a>    | Human | Male   | unknown | Hospitalized | Original | Nasopharyngeal and oropharyngeal swab |
| <a href="#">hCoV-19/Mexico/CMX-INER-IBT-101/2020</a>  | <a href="#">EPI_ISL_1302364</a> | <a href="#">08/12/2020</a> | <a href="#">Mexico City</a>    | Human | Male   | unknown | Hospitalized | Original | Nasopharyngeal and oropharyngeal swab |
| <a href="#">hCoV-19/Mexico/CMX-INER-IBT-103/2020</a>  | <a href="#">EPI_ISL_1302375</a> | <a href="#">08/12/2020</a> | <a href="#">Mexico City</a>    | Human | Female | unknown | Hospitalized | Original | Nasopharyngeal and oropharyngeal swab |
| <a href="#">hCoV-19/Mexico/CMX-INER-IBT-98/2020</a>   | <a href="#">EPI_ISL_1302383</a> | <a href="#">08/12/2020</a> | <a href="#">Mexico City</a>    | Human | Male   | unknown | Hospitalized | Original | Nasopharyngeal and oropharyngeal swab |
| <a href="#">hCoV-19/Mexico/CMX-INER-IBT-108/2020</a>  | <a href="#">EPI_ISL_1302384</a> | <a href="#">08/12/2020</a> | <a href="#">Mexico City</a>    | Human | Female | unknown | Hospitalized | Original | Nasopharyngeal and oropharyngeal swab |
| <a href="#">hCoV-19/Mexico/CMX-INER-IBT-104/2020</a>  | <a href="#">EPI_ISL_1302399</a> | <a href="#">08/12/2020</a> | <a href="#">Mexico City</a>    | Human | Female | unknown | Hospitalized | Original | Nasopharyngeal and oropharyngeal swab |
| <a href="#">hCoV-19/Mexico/CMX-INER-IBT-89/2020</a>   | <a href="#">EPI_ISL_1302258</a> | <a href="#">08/12/2020</a> | <a href="#">Mexico City</a>    | Human | Female | unknown | Hospitalized | Original | Nasopharyngeal and oropharyngeal swab |
| <a href="#">hCoV-19/Mexico/CMX-INER-IBT-87/2020</a>   | <a href="#">EPI_ISL_1302308</a> | <a href="#">09/12/2020</a> | <a href="#">Mexico City</a>    | Human | Male   | unknown | Hospitalized | Original | Nasopharyngeal and oropharyngeal swab |
| <a href="#">hCoV-19/Mexico/CMX-INER-IBT-84/2020</a>   | <a href="#">EPI_ISL_1302395</a> | <a href="#">09/12/2020</a> | <a href="#">Mexico City</a>    | Human | Female | unknown | Hospitalized | Original | Nasopharyngeal and oropharyngeal swab |
| <a href="#">hCoV-19/Mexico/CMX-IMSS_K4/2020</a>       | <a href="#">EPI_ISL_1096141</a> | <a href="#">10/12/2020</a> | <a href="#">Mexico City</a>    | Human | Male   | 32      | Deceased     | Original | Bronchioalveolar lavage               |
| <a href="#">hCoV-19/Mexico/CMX-IMSS_K2/2020</a>       | <a href="#">EPI_ISL_1096985</a> | <a href="#">10/12/2020</a> | <a href="#">Mexico City</a>    | Human | Female | 57      | Deceased     | Original | Bronchioalveolar lavage               |
| <a href="#">hCoV-19/Mexico/CMX-INER-IBT-97/2020</a>   | <a href="#">EPI_ISL_1302304</a> | <a href="#">14/12/2020</a> | <a href="#">Mexico City</a>    | Human | Female | unknown | Hospitalized | Original | Nasopharyngeal and oropharyngeal swab |
| <a href="#">hCoV-19/Mexico/CMX-INER-IBT-88/2020</a>   | <a href="#">EPI_ISL_1302350</a> | <a href="#">14/12/2020</a> | <a href="#">Mexico City</a>    | Human | Male   | unknown | Hospitalized | Original | Nasopharyngeal and oropharyngeal swab |
| <a href="#">hCoV-19/Mexico/PUE-InDRE-IBT-156/2020</a> | <a href="#">EPI_ISL_1302211</a> | <a href="#">15/12/2020</a> | <a href="#">Puebla</a>         | Human | Female | 36      | Ambulatory   | Original | Pharyngeal swab                       |
| <a href="#">hCoV-19/Mexico/AGU-InDRE-IBT-201/2020</a> | <a href="#">EPI_ISL_1302183</a> | <a href="#">17/12/2020</a> | <a href="#">Aguascalientes</a> | Human | Male   | 19      | Ambulatory   | Original | Pharyngeal swab                       |
| <a href="#">hCoV-19/Mexico/PUE-InDRE-IBT-205/2020</a> | <a href="#">EPI_ISL_1302218</a> | <a href="#">18/12/2020</a> | <a href="#">Puebla</a>         | Human | Male   | 21      | Ambulatory   | Original | Pharyngeal swab                       |
| <a href="#">hCoV-19/Mexico/PUE-InDRE-IBT-158/2020</a> | <a href="#">EPI_ISL_1302380</a> | <a href="#">18/12/2020</a> | <a href="#">Puebla</a>         | Human | Female | 49      | Ambulatory   | Original | Pharyngeal swab                       |
| <a href="#">hCoV-19/Mexico/CMX-INER-IBT-90/2020</a>   | <a href="#">EPI_ISL_1302386</a> | <a href="#">18/12/2020</a> | <a href="#">Mexico City</a>    | Human | Female | unknown | Hospitalized | Original | Nasopharyngeal and oropharyngeal swab |
| <a href="#">hCoV-19/Mexico/PUE-InDRE-IBT-157/2020</a> | <a href="#">EPI_ISL_1302174</a> | <a href="#">18/12/2020</a> | <a href="#">Puebla</a>         | Human | Male   | 38      | Ambulatory   | Original |                                       |
| <a href="#">hCoV-19/Mexico/PUE-InDRE-IBT-208/2020</a> | <a href="#">EPI_ISL_1302176</a> | <a href="#">18/12/2020</a> | <a href="#">Puebla</a>         | Human | Male   | 54      | Ambulatory   | Original | Pharyngeal swab                       |
| <a href="#">hCoV-19/Mexico/VER-InDRE-IBT-160/2020</a> | <a href="#">EPI_ISL_1302219</a> | <a href="#">19/12/2020</a> | <a href="#">Veracruz</a>       | Human | Male   | 52      | Ambulatory   | Original | Pharyngeal swab                       |
| <a href="#">hCoV-19/Mexico/PUE-InDRE-IBT-209/2020</a> | <a href="#">EPI_ISL_1302254</a> | <a href="#">19/12/2020</a> | <a href="#">Puebla</a>         | Human | Female | 31      | Ambulatory   | Original | Pharyngeal swab                       |
| <a href="#">hCoV-19/Mexico/PUE-InDRE-IBT-161/2020</a> | <a href="#">EPI_ISL_1302342</a> | <a href="#">20/12/2020</a> | <a href="#">Puebla</a>         | Human | Female | 42      | Ambulatory   | Original | Pharyngeal swab                       |
| <a href="#">hCoV-19/Mexico/PUE-InDRE-IBT-162/2020</a> | <a href="#">EPI_ISL_1302283</a> | <a href="#">20/12/2020</a> | <a href="#">Puebla</a>         | Human | Female | 52      | Ambulatory   | Original | Pharyngeal swab                       |
| <a href="#">hCoV-19/Mexico/PUE-InDRE-IBT-204/2020</a> | <a href="#">EPI_ISL_1302217</a> | <a href="#">21/12/2020</a> | <a href="#">Puebla</a>         | Human | Female | 30      | Ambulatory   | Original | Pharyngeal swab                       |

|                                       |                 |            |                 |       |        |    |            |          |                 |
|---------------------------------------|-----------------|------------|-----------------|-------|--------|----|------------|----------|-----------------|
| hCoV-19/Mexico/PUE-InDRE-IBT-179/2020 | EPI_ISL_1302309 | 21/12/2020 | Puebla          | Human | Female | 52 | Ambulatory | Original | Pharyngeal swab |
| hCoV-19/Mexico/CHP-InDRE-IBT-196/2020 | EPI_ISL_1302310 | 21/12/2020 | Oaxaca          | Human | Female | 32 | Ambulatory | Original | Pharyngeal swab |
| hCoV-19/Mexico/PUE-InDRE-IBT-181/2020 | EPI_ISL_1302331 | 21/12/2020 | Puebla          | Human | Female | 40 | Ambulatory | Original | Pharyngeal swab |
| hCoV-19/Mexico/PUE-InDRE-IBT-172/2020 | EPI_ISL_1302343 | 21/12/2020 | Puebla          | Human | Male   | 28 | Ambulatory | Original | Pharyngeal swab |
| hCoV-19/Mexico/PUE-InDRE-IBT-184/2020 | EPI_ISL_1302398 | 21/12/2020 | Puebla          | Human | Male   | 75 | Deceased   | Original | Pharyngeal swab |
| hCoV-19/Mexico/AGU-InDRE-IBT-210/2020 | EPI_ISL_1302177 | 21/12/2020 | Aguascalientes  | Human | Female | 26 | Ambulatory | Original | Pharyngeal swab |
| hCoV-19/Mexico/PUE-InDRE-IBT-164/2020 | EPI_ISL_1302188 | 21/12/2020 | Puebla          | Human | Female | 34 | Ambulatory | Original | Pharyngeal swab |
| hCoV-19/Mexico/AGU-InDRE-IBT-206/2020 | EPI_ISL_1302200 | 21/12/2020 | Aguascalientes  | Human | Female | 27 | Ambulatory | Original | Pharyngeal swab |
| hCoV-19/Mexico/AGU-InDRE-IBT-211/2020 | EPI_ISL_1302201 | 21/12/2020 | Aguascalientes  | Human | Male   | 20 | Ambulatory | Original | Pharyngeal swab |
| hCoV-19/Mexico/PUE-InDRE-IBT-182/2020 | EPI_ISL_1302286 | 21/12/2020 | Puebla          | Human | Female | 23 | Ambulatory | Original | Pharyngeal swab |
| hCoV-19/Mexico/PUE-InDRE-IBT-203/2020 | EPI_ISL_1302289 | 21/12/2020 | Puebla          | Human | Male   | 36 | Ambulatory | Original | Pharyngeal swab |
| hCoV-19/Mexico/PUE-InDRE-IBT-178/2020 | EPI_ISL_1302154 | 22/12/2020 | Puebla          | Human | Male   | 45 | Ambulatory | Original | Pharyngeal swab |
| hCoV-19/Mexico/MOR-InDRE-IBT-147/2020 | EPI_ISL_1302162 | 22/12/2020 | Morelos         | Human | Male   | 49 | Ambulatory | Original | Pharyngeal swab |
| hCoV-19/Mexico/PUE-InDRE-IBT-183/2020 | EPI_ISL_1302215 | 22/12/2020 | Puebla          | Human | Male   | 43 | Ambulatory | Original | Pharyngeal swab |
| hCoV-19/Mexico/PUE-InDRE-IBT-150/2020 | EPI_ISL_1302241 | 22/12/2020 | Puebla          | Human | Male   | 55 | Ambulatory | Original | Pharyngeal swab |
| hCoV-19/Mexico/PUE-InDRE-IBT-155/2020 | EPI_ISL_1302242 | 22/12/2020 | Puebla          | Human | Female | 43 | Ambulatory | Original | Pharyngeal swab |
| hCoV-19/Mexico/MOR-InDRE-IBT-199/2020 | EPI_ISL_1302293 | 22/12/2020 | Morelos         | Human | Male   | 44 | Ambulatory | Original | Pharyngeal swab |
| hCoV-19/Mexico/PUE-InDRE-IBT-217/2020 | EPI_ISL_1302296 | 22/12/2020 | Puebla          | Human | Female | 23 | Ambulatory | Original | Pharyngeal swab |
| hCoV-19/Mexico/PUE-InDRE-IBT-152/2020 | EPI_ISL_1302313 | 22/12/2020 | Puebla          | Human | Male   | 26 | Ambulatory | Original | Pharyngeal swab |
| hCoV-19/Mexico/PUE-InDRE-IBT-175/2020 | EPI_ISL_1302323 | 22/12/2020 | Puebla          | Human | Female | 47 | Ambulatory | Original | Pharyngeal swab |
| hCoV-19/Mexico/PUE-InDRE-IBT-170/2020 | EPI_ISL_1302333 | 22/12/2020 | Puebla          | Human | Female | 47 | Ambulatory | Original | Pharyngeal swab |
| hCoV-19/Mexico/AGU-InDRE-IBT-212/2020 | EPI_ISL_1302337 | 22/12/2020 | Aguascalientes  | Human | Female | 23 | Ambulatory | Original | Pharyngeal swab |
| hCoV-19/Mexico/MOR-InDRE-IBT-185/2020 | EPI_ISL_1302358 | 22/12/2020 | Morelos         | Human | Male   | 33 | Ambulatory | Original | Pharyngeal swab |
| hCoV-19/Mexico/MOR-InDRE-IBT-148/2020 | EPI_ISL_1302382 | 22/12/2020 | Morelos         | Human | Female | 39 | Ambulatory | Original | Pharyngeal swab |
| hCoV-19/Mexico/PUE-InDRE-IBT-176/2020 | EPI_ISL_1302388 | 22/12/2020 | Puebla          | Human | Male   | 73 | Ambulatory | Original | Pharyngeal swab |
| hCoV-19/Mexico/MOR-InDRE-IBT-191/2020 | EPI_ISL_1302396 | 22/12/2020 | Morelos         | Human | Female | 30 | Ambulatory | Original | Pharyngeal swab |
| hCoV-19/Mexico/PUE-InDRE-IBT-149/2020 | EPI_ISL_1302397 | 22/12/2020 | Puebla          | Human | Female | 31 | Ambulatory | Original | Pharyngeal swab |
| hCoV-19/Mexico/PUE-InDRE-IBT-200/2020 | EPI_ISL_1302181 | 22/12/2020 | Puebla          | Human | Male   | 27 | Ambulatory | Original | Pharyngeal swab |
| hCoV-19/Mexico/BCN-InDRE-IBT-144/2020 | EPI_ISL_1302182 | 22/12/2020 | Baja California | Human | Female | 67 | Ambulatory | Original |                 |
| hCoV-19/Mexico/CHP-InDRE-IBT-197/2020 | EPI_ISL_1302197 | 22/12/2020 | Oaxaca          | Human | Female | 41 | Ambulatory | Original | Pharyngeal swab |
| hCoV-19/Mexico/GRO-InDRE-IBT-153/2020 | EPI_ISL_1302199 | 22/12/2020 | Guerrero        | Human | Male   | 33 | Ambulatory | Original | Pharyngeal swab |
| hCoV-19/Mexico/PUE-InDRE-IBT-154/2020 | EPI_ISL_1302210 | 22/12/2020 | Puebla          | Human | Male   | 32 | Ambulatory | Original | Pharyngeal swab |
| hCoV-19/Mexico/PUE-InDRE-IBT-166/2020 | EPI_ISL_1302212 | 22/12/2020 | Puebla          | Human | Male   | 39 | Ambulatory | Original | Pharyngeal swab |
| hCoV-19/Mexico/MOR-InDRE-IBT-198/2020 | EPI_ISL_1302259 | 22/12/2020 | Morelos         | Human | Male   | 36 | Ambulatory | Original | Pharyngeal swab |
| hCoV-19/Mexico/PUE-InDRE-IBT-171/2020 | EPI_ISL_1302262 | 22/12/2020 | Puebla          | Human | Male   | 37 | Ambulatory | Original | Pharyngeal swab |
| hCoV-19/Mexico/MOR-InDRE-IBT-145/2020 | EPI_ISL_1302265 | 22/12/2020 | Morelos         | Human | Female | 35 | Ambulatory | Original | Pharyngeal swab |
| hCoV-19/Mexico/AGU-InDRE-IBT-215/2020 | EPI_ISL_1302274 | 22/12/2020 | Aguascalientes  | Human | Female | 51 | Ambulatory | Original | Pharyngeal swab |
| hCoV-19/Mexico/MOR-InDRE-IBT-151/2020 | EPI_ISL_1302276 | 22/12/2020 | Morelos         | Human | Male   | 54 | Ambulatory | Original | Pharyngeal swab |
| hCoV-19/Mexico/PUE-InDRE-IBT-180/2020 | EPI_ISL_1302279 | 22/12/2020 | Puebla          | Human | Male   | 50 | Ambulatory | Original | Pharyngeal swab |
| hCoV-19/Mexico/CHP-InDRE-IBT-159/2020 | EPI_ISL_1302287 | 22/12/2020 | Chiapas         | Human | Female | 56 | Deceased   | Original | Pharyngeal swab |
| hCoV-19/Mexico/AGU-InDRE-IBT-213/2020 | EPI_ISL_1302166 | 23/12/2020 | Aguascalientes  | Human | Female | 56 | Ambulatory | Original | Pharyngeal swab |

|                                       |                 |            |                |       |        |         |              |          |                                       |
|---------------------------------------|-----------------|------------|----------------|-------|--------|---------|--------------|----------|---------------------------------------|
| hCoV-19/Mexico/CHP-InDRE-IBT-194/2020 | EPI_ISL_1302167 | 23/12/2020 | Chiapas        | Human | Female | 27      | Ambulatory   | Original | Pharyngeal swab                       |
| hCoV-19/Mexico/MOR-InDRE-IBT-193/2020 | EPI_ISL_1302168 | 23/12/2020 | Morelos        | Human | Female | 30      | Ambulatory   | Original | Pharyngeal swab                       |
| hCoV-19/Mexico/PUE-InDRE-IBT-168/2020 | EPI_ISL_1302213 | 23/12/2020 | Puebla         | Human | Male   | 41      | Ambulatory   | Original | Pharyngeal swab                       |
| hCoV-19/Mexico/PUE-InDRE-IBT-173/2020 | EPI_ISL_1302214 | 23/12/2020 | Puebla         | Human | Male   | 27      | Ambulatory   | Original | Pharyngeal swab                       |
| hCoV-19/Mexico/PUE-InDRE-IBT-202/2020 | EPI_ISL_1302216 | 23/12/2020 | Puebla         | Human | Male   | 47      | Ambulatory   | Original | Pharyngeal swab                       |
| hCoV-19/Mexico/MOR-InDRE-IBT-192/2020 | EPI_ISL_1302295 | 23/12/2020 | Morelos        | Human | Male   | 24      | Ambulatory   | Original | Pharyngeal swab                       |
| hCoV-19/Mexico/CHP-InDRE-IBT-195/2020 | EPI_ISL_1302300 | 23/12/2020 | Chiapas        | Human | Female | 39      | Ambulatory   | Original | Pharyngeal swab                       |
| hCoV-19/Mexico/MOR-InDRE-IBT-188/2020 | EPI_ISL_1302314 | 23/12/2020 | Morelos        | Human | Male   | 24      | Ambulatory   | Original | Pharyngeal swab                       |
| hCoV-19/Mexico/PUE-InDRE-IBT-167/2020 | EPI_ISL_1302321 | 23/12/2020 | Puebla         | Human | Male   | 57      | Deceased     | Original | Pharyngeal swab                       |
| hCoV-19/Mexico/PUE-InDRE-IBT-174/2020 | EPI_ISL_1302322 | 23/12/2020 | Puebla         | Human | Male   | 38      | Ambulatory   | Original | Pharyngeal swab                       |
| hCoV-19/Mexico/MOR-InDRE-IBT-189/2020 | EPI_ISL_1302340 | 23/12/2020 | Morelos        | Human | Female | 32      | Ambulatory   | Original | Pharyngeal swab                       |
| hCoV-19/Mexico/MOR-InDRE-IBT-186/2020 | EPI_ISL_1302363 | 23/12/2020 | Morelos        | Human | Male   | 37      | Ambulatory   | Original | Pharyngeal swab                       |
| hCoV-19/Mexico/MOR-InDRE-IBT-187/2020 | EPI_ISL_1302175 | 23/12/2020 | Morelos        | Human | Male   | 26      | Ambulatory   | Original | Pharyngeal swab                       |
| hCoV-19/Mexico/AGU-InDRE-IBT-214/2020 | EPI_ISL_1302184 | 23/12/2020 | Aguascalientes | Human | Female | 46      | Ambulatory   | Original | Pharyngeal swab                       |
| hCoV-19/Mexico/PUE-InDRE-IBT-146/2020 | EPI_ISL_1302187 | 23/12/2020 | Puebla         | Human | Female | 30      | Ambulatory   | Original | Pharyngeal swab                       |
| hCoV-19/Mexico/PUE-InDRE-IBT-177/2020 | EPI_ISL_1302189 | 23/12/2020 | Puebla         | Human | Female | 40      | Ambulatory   | Original | Pharyngeal swab                       |
| hCoV-19/Mexico/AGU-InDRE-IBT-216/2020 | EPI_ISL_1302202 | 23/12/2020 | Aguascalientes | Human | Male   | 24      | Ambulatory   | Original | Pharyngeal swab                       |
| hCoV-19/Mexico/MOR-InDRE-IBT-190/2020 | EPI_ISL_1302209 | 23/12/2020 | Morelos        | Human | Female | 28      | Ambulatory   | Original | Pharyngeal swab                       |
| hCoV-19/Mexico/CMX-INER-IBT-113/2020  | EPI_ISL_1302266 | 23/12/2020 | Mexico City    | Human | Male   | unknown | Hospitalized | Original | Nasopharyngeal and oropharyngeal swab |
| hCoV-19/Mexico/PUE-InDRE-IBT-207/2020 | EPI_ISL_1302344 | 24/12/2020 | Puebla         | Human | Female | 43      | Ambulatory   | Original | Pharyngeal swab                       |
| hCoV-19/Mexico/CMX-INER-IBT-112/2020  | EPI_ISL_1302373 | 25/12/2020 | Mexico City    | Human | Male   | unknown | Hospitalized | Original | Nasopharyngeal and oropharyngeal swab |
| hCoV-19/Mexico/PUE-InDRE-IBT-163/2020 | EPI_ISL_1302335 | 27/12/2020 | Puebla         | Human | Male   | 60      | Deceased     | Original | Pharyngeal swab                       |
| hCoV-19/Mexico/CMX-INER-IBT-109/2020  | EPI_ISL_1302179 | 28/12/2020 | Mexico City    | Human | Male   | unknown | Hospitalized | Original | Nasopharyngeal and oropharyngeal swab |
| hCoV-19/Mexico/CMX-INER-IBT-111/2020  | EPI_ISL_1302163 | 31/12/2020 | Mexico City    | Human | Male   | unknown | Hospitalized | Original | Nasopharyngeal and oropharyngeal swab |
| hCoV-19/Mexico/CMX-INER-IBT-114/2020  | EPI_ISL_1302400 | 31/12/2020 | Mexico City    | Human | Male   | unknown | Hospitalized | Original | Nasopharyngeal and oropharyngeal swab |
| hCoV-19/Mexico/CMX-INER-IBT-110/2020  | EPI_ISL_1302334 | 31/12/2020 | Mexico City    | Human | Male   | unknown | Hospitalized | Original | Nasopharyngeal and oropharyngeal swab |
| hCoV-19/Mexico/CMX-INER-IBT-115/2020  | EPI_ISL_1302356 | 31/12/2020 | Mexico City    | Human | Male   | unknown | Hospitalized | Original | Nasopharyngeal and oropharyngeal swab |
| hCoV-19/Mexico/CMX-INER-IBT-116/2021  | EPI_ISL_1302227 | 04/01/2021 | Mexico City    | Human | Male   | unknown | Hospitalized | Original | Nasopharyngeal and oropharyngeal swab |
| hCoV-19/Mexico/CMX-INER-IBT-120/2021  | EPI_ISL_1302228 | 04/01/2021 | Mexico City    | Human | Female | unknown | Hospitalized | Original | Nasopharyngeal and oropharyngeal swab |
| hCoV-19/Mexico/CMX-INER-IBT-131/2021  | EPI_ISL_1302245 | 04/01/2021 | Mexico City    | Human | Female | unknown | Hospitalized | Original | Nasopharyngeal and oropharyngeal swab |
| hCoV-19/Mexico/CMX-INER-IBT-132/2021  | EPI_ISL_1302306 | 04/01/2021 | Mexico City    | Human | Female | unknown | Hospitalized | Original | Nasopharyngeal and oropharyngeal swab |
| hCoV-19/Mexico/CMX-INER-IBT-121/2021  | EPI_ISL_1302360 | 04/01/2021 | Mexico City    | Human | Female | unknown | Hospitalized | Original | Nasopharyngeal and oropharyngeal swab |
| hCoV-19/Mexico/CMX-INER-IBT-130/2021  | EPI_ISL_1302368 | 04/01/2021 | Mexico City    | Human | Female | unknown | Hospitalized | Original | Nasopharyngeal and oropharyngeal swab |
| hCoV-19/Mexico/CMX-INER-IBT-133/2021  | EPI_ISL_1302374 | 04/01/2021 | Mexico City    | Human | Female | unknown | Hospitalized | Original | Nasopharyngeal and oropharyngeal swab |
| hCoV-19/Mexico/CMX-INER-IBT-129/2021  | EPI_ISL_1302376 | 04/01/2021 | Mexico City    | Human | Male   | unknown | Hospitalized | Original | Nasopharyngeal and oropharyngeal swab |
| hCoV-19/Mexico/CMX-INER-IBT-124/2021  | EPI_ISL_1302273 | 04/01/2021 | Mexico City    | Human | Female | unknown | Hospitalized | Original | Nasopharyngeal and oropharyngeal swab |
| hCoV-19/Mexico/CMX-INER-IBT-122/2021  | EPI_ISL_1302278 | 04/01/2021 | Mexico City    | Human | Male   | unknown | Hospitalized | Original | Nasopharyngeal and oropharyngeal swab |
| hCoV-19/Mexico/CMX-INER-IBT-119/2021  | EPI_ISL_1302316 | 05/01/2021 | Mexico City    | Human | Male   | unknown | Hospitalized | Original | Nasopharyngeal and oropharyngeal swab |
| hCoV-19/Mexico/CMX-INER-IBT-123/2021  | EPI_ISL_1302387 | 05/01/2021 | Mexico City    | Human | Male   | unknown | Hospitalized | Original | Nasopharyngeal and oropharyngeal swab |
| hCoV-19/Mexico/CMX-INER-IBT-127/2021  | EPI_ISL_1302198 | 05/01/2021 | Mexico City    | Human | Male   | unknown | Hospitalized | Original | Nasopharyngeal and oropharyngeal swab |
| hCoV-19/Mexico/CMX-INER-IBT-125/2021  | EPI_ISL_1302267 | 05/01/2021 | Mexico City    | Human | Male   | unknown | Hospitalized | Original | Nasopharyngeal and oropharyngeal swab |



|                                       |                 |            |                 |       |        |         |              |          |                                       |
|---------------------------------------|-----------------|------------|-----------------|-------|--------|---------|--------------|----------|---------------------------------------|
| hCoV-19/Mexico/CMX-INER-IBT-128/2021  | EPI_ISL_1302361 | 06/01/2021 | Mexico City     | Human | Female | unknown | Hospitalized | Original | Nasopharyngeal and oropharyngeal swab |
| hCoV-19/Mexico/CMX-INER-IBT-118/2021  | EPI_ISL_1302192 | 06/01/2021 | Mexico City     | Human | Female | unknown | Hospitalized | Original | Nasopharyngeal and oropharyngeal swab |
| hCoV-19/Mexico/CMX-INER-IBT-117/2021  | EPI_ISL_1302327 | 11/01/2021 | Mexico City     | Human | Female | unknown | Hospitalized | Original | Nasopharyngeal and oropharyngeal swab |
| hCoV-19/Mexico/PUE-InDRE-IBT-165/2021 | EPI_ISL_1302371 | 14/01/2021 | Puebla          | Human | Male   | 41      | Ambulatory   | Original | Pharyngeal swab                       |
| hCoV-19/Mexico/MEX-IBT-IMSS-515/2021  | EPI_ISL_1302236 | 29/01/2021 | State of Mexico | Human | Male   | 39      | Hospitalized | Original | Nasopharyngeal and oropharyngeal swab |
| hCoV-19/Mexico/CMX-IBT-IMSS-531/2021  | EPI_ISL_1302294 | 29/01/2021 | Mexico City     | Human | Female | 32      | Ambulatory   | Original | Nasopharyngeal and oropharyngeal swab |
| hCoV-19/Mexico/VER-IBT-IMSS-557/2021  | EPI_ISL_1302354 | 29/01/2021 | Veracruz        | Human | Male   | 51      | Ambulatory   | Original | Pharyngeal swab                       |
| hCoV-19/Mexico/CMX-IBT-IMSS-520/2021  | EPI_ISL_1302355 | 29/01/2021 | Mexico City     | Human | Female | 26      | Ambulatory   | Original | Nasopharyngeal and oropharyngeal swab |
| hCoV-19/Mexico/PUE-IBT-IMSS-577/2021  | EPI_ISL_1302390 | 29/01/2021 | Puebla          | Human | Female | 56      | Ambulatory   | Original | Nasopharyngeal and oropharyngeal swab |
| hCoV-19/Mexico/MEX-IBT-IMSS-544/2021  | EPI_ISL_1302172 | 29/01/2021 | State of Mexico | Human | Male   | 72      | Hospitalized | Original | Nasopharyngeal and oropharyngeal swab |
| hCoV-19/Mexico/CMX-IBT-IMSS-521/2021  | EPI_ISL_1302284 | 29/01/2021 | Mexico City     | Human | Female | 43      | Ambulatory   | Original | Nasopharyngeal and oropharyngeal swab |
| hCoV-19/Mexico/SLP-IBT-IMSS-559/2021  | EPI_ISL_1302153 | 30/01/2021 | San Luis Potosi | Human | Male   | 26      | Ambulatory   | Original | Nasopharyngeal and oropharyngeal swab |
| hCoV-19/Mexico/MEX-IBT-IMSS-547/2021  | EPI_ISL_1302157 | 30/01/2021 | State of Mexico | Human | Male   | 23      | Hospitalized | Original | Pharyngeal swab                       |
| hCoV-19/Mexico/BCN-IBT-IMSS-519/2021  | EPI_ISL_1302220 | 30/01/2021 | Baja California | Human | Male   | 35      | Ambulatory   | Original | Nasopharyngeal and oropharyngeal swab |
| hCoV-19/Mexico/SLP-IBT-IMSS-584/2021  | EPI_ISL_1302237 | 30/01/2021 | San Luis Potosi | Human | Female | 30      | Ambulatory   | Original | Nasopharyngeal and oropharyngeal swab |
| hCoV-19/Mexico/VER-IBT-IMSS-527/2021  | EPI_ISL_1302238 | 30/01/2021 | Veracruz        | Human | Female | 71      | Hospitalized | Original | Nasopharyngeal and oropharyngeal swab |
| hCoV-19/Mexico/SLP-IBT-IMSS-585/2021  | EPI_ISL_1302332 | 30/01/2021 | San Luis Potosi | Human | Male   | 62      | Hospitalized | Original | Nasopharyngeal and oropharyngeal swab |
| hCoV-19/Mexico/VER-IBT-IMSS-556/2021  | EPI_ISL_1302341 | 30/01/2021 | Veracruz        | Human | Male   | 60      | Hospitalized | Original | Nasopharyngeal and oropharyngeal swab |
| hCoV-19/Mexico/SLP-IBT-IMSS-583/2021  | EPI_ISL_1302353 | 30/01/2021 | San Luis Potosi | Human | Male   | 53      | Hospitalized | Original | Nasopharyngeal and oropharyngeal swab |
| hCoV-19/Mexico/PUE-IBT-IMSS-576/2021  | EPI_ISL_1302173 | 30/01/2021 | Puebla          | Human | Male   | 41      | Ambulatory   | Original | Nasopharyngeal and oropharyngeal swab |
| hCoV-19/Mexico/MEX-IBT-IMSS-545/2021  | EPI_ISL_1302195 | 30/01/2021 | State of Mexico | Human | Female | 37      | Hospitalized | Original | Nasopharyngeal and oropharyngeal swab |
| hCoV-19/Mexico/HID-IBT-IMSS-522/2021  | EPI_ISL_1302264 | 30/01/2021 | Hidalgo         | Human | Male   | 61      | Hospitalized | Original | Nasopharyngeal and oropharyngeal swab |
| hCoV-19/Mexico/SLP-IBT-IMSS-560/2021  | EPI_ISL_1302161 | 31/01/2021 | San Luis Potosi | Human | Female | 25      | Ambulatory   | Original | Nasopharyngeal and oropharyngeal swab |
| hCoV-19/Mexico/MEX-IBT-IMSS-546/2021  | EPI_ISL_1302169 | 31/01/2021 | State of Mexico | Human | Female | 58      | Hospitalized | Original | Pharyngeal swab                       |
| hCoV-19/Mexico/QUE-IBT-IMSS-517/2021  | EPI_ISL_1302401 | 31/01/2021 | Queretaro       | Human | Male   | 87      | Hospitalized | Original | Nasopharyngeal and oropharyngeal swab |
| hCoV-19/Mexico/HID-IBT-IMSS-514/2021  | EPI_ISL_1302235 | 31/01/2021 | Hidalgo         | Human | Female | 56      | Hospitalized | Original | Nasopharyngeal and oropharyngeal swab |
| hCoV-19/Mexico/VER-IBT-IMSS-554/2021  | EPI_ISL_1302305 | 31/01/2021 | Veracruz        | Human | Male   | 67      | Hospitalized | Original | Nasopharyngeal and oropharyngeal swab |
| hCoV-19/Mexico/SLP-IBT-IMSS-561/2021  | EPI_ISL_1302311 | 31/01/2021 | San Luis Potosi | Human | Male   | 19      | Ambulatory   | Original | Nasopharyngeal and oropharyngeal swab |
| hCoV-19/Mexico/SLP-IBT-IMSS-562/2021  | EPI_ISL_1302352 | 31/01/2021 | San Luis Potosi | Human | Female | 58      | Ambulatory   | Original | Nasopharyngeal and oropharyngeal swab |
| hCoV-19/Mexico/CMX-IBT-IMSS-538/2021  | EPI_ISL_1302178 | 31/01/2021 | Mexico City     | Human | Female | 75      | Hospitalized | Original | Nasopharyngeal and oropharyngeal swab |
| hCoV-19/Mexico/CMX-IBT-IMSS-523/2021  | EPI_ISL_1302203 | 31/01/2021 | Mexico City     | Human | Male   | 71      | Hospitalized | Original | Pharyngeal swab                       |
| hCoV-19/Mexico/CMX-IBT-IMSS-530/2021  | EPI_ISL_1302204 | 31/01/2021 | Mexico City     | Human | Male   | 50      | Ambulatory   | Original | Pharyngeal swab                       |
| hCoV-19/Mexico/MEX-IBT-IMSS-551/2021  | EPI_ISL_1302252 | 31/01/2021 | State of Mexico | Human | Male   | 84      | Hospitalized | Original | Pharyngeal swab                       |
| hCoV-19/Mexico/VER-IBT-IMSS-555/2021  | EPI_ISL_1302260 | 31/01/2021 | Veracruz        | Human | Male   | 58      | Hospitalized | Original | Nasopharyngeal and oropharyngeal swab |
| hCoV-19/Mexico/PUE-IBT-IMSS-575/2021  | EPI_ISL_1302268 | 31/01/2021 | Puebla          | Human | Female | 40      | Ambulatory   | Original | Pharyngeal swab                       |
| hCoV-19/Mexico/CMX-IBT-IMSS-528/2021  | EPI_ISL_1302275 | 31/01/2021 | Mexico City     | Human | Female | 56      | Ambulatory   | Original | Pharyngeal swab                       |
| hCoV-19/Mexico/QUE-IBT-IMSS-516/2021  | EPI_ISL_1302282 | 31/01/2021 | Queretaro       | Human | Male   | 56      | Hospitalized | Original | Nasopharyngeal and oropharyngeal swab |
| hCoV-19/Mexico/PUE-IBT-IMSS-574/2021  | EPI_ISL_1302288 | 31/01/2021 | Puebla          | Human | Female | 39      | Ambulatory   | Original | Pharyngeal swab                       |
| hCoV-19/Mexico/CMX-IBT-IMSS-535/2021  | EPI_ISL_1302165 | 01/02/2021 | Mexico City     | Human | Male   | 51      | Ambulatory   | Original | Nasopharyngeal and oropharyngeal swab |
| hCoV-19/Mexico/CMX-IBT-IMSS-536/2021  | EPI_ISL_1302223 | 01/02/2021 | Mexico City     | Human | Male   | 45      | Hospitalized | Original | Nasopharyngeal and oropharyngeal swab |
| hCoV-19/Mexico/SLP-IBT-IMSS-579/2021  | EPI_ISL_1302239 | 01/02/2021 | San Luis Potosi | Human | Male   | 70      | Hospitalized | Original | Nasopharyngeal and oropharyngeal swab |

|                                         |                 |            |                 |       |        |    |              |          |                                       |
|-----------------------------------------|-----------------|------------|-----------------|-------|--------|----|--------------|----------|---------------------------------------|
| hCoV-19/Mexico/MEX-IBT-IMSS-542/2021    | EPI_ISL_1302248 | 01/02/2021 | State of Mexico | Human | Male   | 70 | Hospitalized | Original | Pharyngeal swab                       |
| hCoV-19/Mexico/CMX-IBT-IMSS-533/2021    | EPI_ISL_1302315 | 01/02/2021 | Mexico City     | Human | Male   | 61 | Hospitalized | Original | Nasopharyngeal and oropharyngeal swab |
| hCoV-19/Mexico/SLP-IBT-IMSS-580/2021    | EPI_ISL_1302318 | 01/02/2021 | San Luis Potosi | Human | Male   | 40 | Ambulatory   | Original | Nasopharyngeal and oropharyngeal swab |
| hCoV-19/Mexico/CMX-IBT-IMSS-537/2021    | EPI_ISL_1302347 | 01/02/2021 | Mexico City     | Human | Male   | 80 | Hospitalized | Original | Pharyngeal swab                       |
| hCoV-19/Mexico/MEX-IBT-IMSS-543/2021    | EPI_ISL_1302348 | 01/02/2021 | State of Mexico | Human | Male   | 58 | Hospitalized | Original | Pharyngeal swab                       |
| hCoV-19/Mexico/MEX-IBT-IMSS-549/2021    | EPI_ISL_1302351 | 01/02/2021 | State of Mexico | Human | Male   | 56 | Hospitalized | Original | Nasopharyngeal and oropharyngeal swab |
| hCoV-19/Mexico/MEX-IBT-IMSS-552/2021    | EPI_ISL_1302359 | 01/02/2021 | State of Mexico | Human | Male   | 61 | Hospitalized | Original | Nasopharyngeal and oropharyngeal swab |
| hCoV-19/Mexico/SLP-IBT-IMSS-578/2021    | EPI_ISL_1302362 | 01/02/2021 | San Luis Potosi | Human | Female | 67 | Ambulatory   | Original | Nasopharyngeal and oropharyngeal swab |
| hCoV-19/Mexico/SLP-IBT-IMSS-582/2021    | EPI_ISL_1302367 | 01/02/2021 | San Luis Potosi | Human | Male   | 70 | Hospitalized | Original | Nasopharyngeal and oropharyngeal swab |
| hCoV-19/Mexico/MEX-IBT-IMSS-541/2021    | EPI_ISL_1302370 | 01/02/2021 | State of Mexico | Human | Female | 58 | Hospitalized | Original | Pharyngeal swab                       |
| hCoV-19/Mexico/CMX-IBT-IMSS-534/2021    | EPI_ISL_1302378 | 01/02/2021 | Mexico City     | Human | Female | 49 | Hospitalized | Original | Nasopharyngeal and oropharyngeal swab |
| hCoV-19/Mexico/MEX-IBT-IMSS-525/2021    | EPI_ISL_1302196 | 01/02/2021 | State of Mexico | Human | Female | 82 | Hospitalized | Original | Pharyngeal swab                       |
| hCoV-19/Mexico/MEX-IBT-IMSS-540/2021    | EPI_ISL_1302251 | 01/02/2021 | State of Mexico | Human | Male   | 62 | Hospitalized | Original | Pharyngeal swab                       |
| hCoV-19/Mexico/CMX-IBT-IMSS-526/2021    | EPI_ISL_1302261 | 01/02/2021 | Mexico City     | Human | Male   | 75 | Hospitalized | Original | Pharyngeal swab                       |
| hCoV-19/Mexico/MEX-IBT-IMSS-550/2021    | EPI_ISL_1302270 | 01/02/2021 | State of Mexico | Human | Male   | 52 | Hospitalized | Original | Nasopharyngeal and oropharyngeal swab |
| hCoV-19/Mexico/CMX-IBT-IMSS-518/2021    | EPI_ISL_1302272 | 01/02/2021 | Mexico City     | Human | Female | 31 | Ambulatory   | Original | Nasopharyngeal and oropharyngeal swab |
| hCoV-19/Mexico/SLP-IBT-IMSS-581/2021    | EPI_ISL_1302285 | 01/02/2021 | San Luis Potosi | Human | Male   | 60 | Ambulatory   | Original | Nasopharyngeal and oropharyngeal swab |
| hCoV-19/Mexico/CMX-IBT-IMSS-568/2021    | EPI_ISL_1302156 | 02/02/2021 | Mexico City     | Human | Male   | 46 | Ambulatory   | Original | Nasopharyngeal and oropharyngeal swab |
| hCoV-19/Mexico/MEX-IBT-IMSS-553/2021    | EPI_ISL_1302158 | 02/02/2021 | State of Mexico | Human | Female | 65 | Hospitalized | Original | Nasopharyngeal and oropharyngeal swab |
| hCoV-19/Mexico/CMX-IBT-IMSS-529/2021    | EPI_ISL_1302222 | 02/02/2021 | Mexico City     | Human | Female | 28 | Hospitalized | Original | Nasopharyngeal and oropharyngeal swab |
| hCoV-19/Mexico/CMX-IBT-IMSS-563/2021    | EPI_ISL_1302224 | 02/02/2021 | Mexico City     | Human | Female | 25 | Ambulatory   | Original | Nasopharyngeal and oropharyngeal swab |
| hCoV-19/Mexico/CMX-IBT-IMSS-571/2021    | EPI_ISL_1302225 | 02/02/2021 | Mexico City     | Human | Female | 27 | Ambulatory   | Original | Nasopharyngeal and oropharyngeal swab |
| hCoV-19/Mexico/CMX-IBT-IMSS-573/2021    | EPI_ISL_1302226 | 02/02/2021 | Mexico City     | Human | Male   | 41 | Ambulatory   | Original | Nasopharyngeal and oropharyngeal swab |
| hCoV-19/Mexico/CMX-IBT-IMSS-532/2021    | EPI_ISL_1302240 | 02/02/2021 | Mexico City     | Human | Male   | 40 | Ambulatory   | Original | Pharyngeal swab                       |
| hCoV-19/Mexico/CMX-IBT-IMSS-564/2021    | EPI_ISL_1302243 | 02/02/2021 | Mexico City     | Human | Male   | 46 | Ambulatory   | Original | Nasopharyngeal and oropharyngeal swab |
| hCoV-19/Mexico/CMX-IBT-IMSS-569/2021    | EPI_ISL_1302324 | 02/02/2021 | Mexico City     | Human | Female | 51 | Ambulatory   | Original | Nasopharyngeal and oropharyngeal swab |
| hCoV-19/Mexico/CMX-IBT-IMSS-570/2021    | EPI_ISL_1302372 | 02/02/2021 | Mexico City     | Human | Male   | 59 | Ambulatory   | Original | Nasopharyngeal and oropharyngeal swab |
| hCoV-19/Mexico/CMX-IBT-IMSS-565/2021    | EPI_ISL_1302379 | 02/02/2021 | Mexico City     | Human | Male   | 39 | Ambulatory   | Original | Nasopharyngeal and oropharyngeal swab |
| hCoV-19/Mexico/MEX-IBT-IMSS-539/2021    | EPI_ISL_1302393 | 02/02/2021 | State of Mexico | Human | Female | 44 | Hospitalized | Original | Pharyngeal swab                       |
| hCoV-19/Mexico/CMX-IBT-IMSS-572/2021    | EPI_ISL_1302190 | 02/02/2021 | Mexico City     | Human | Female | 43 | Ambulatory   | Original | Nasopharyngeal and oropharyngeal swab |
| hCoV-19/Mexico/CMX-IBT-IMSS-567/2021    | EPI_ISL_1302281 | 02/02/2021 | Mexico City     | Human | Female | 64 | Ambulatory   | Original | Nasopharyngeal and oropharyngeal swab |
| hCoV-19/Mexico/CHH-INER-IMSS-00262/2021 | EPI_ISL_1279276 | 03/02/2021 | Chihuahua       | Human | Female | 67 | Hospitalized | Original | Nasopharyngeal and oropharyngeal swab |
| hCoV-19/Mexico/CMX-IBT-IMSS-216/2021    | EPI_ISL_1288411 | 03/02/2021 | Mexico City     | Human | Male   | 58 | Hospitalized | Original | Nasopharyngeal and oropharyngeal swab |
| hCoV-19/Mexico/TAM-INER-IMSS-00191/2021 | EPI_ISL_1279462 | 03/02/2021 | Tamaulipas      | Human | Female | 67 | Ambulatory   | Original | Nasopharyngeal and oropharyngeal swab |
| hCoV-19/Mexico/CMX-IBT-IMSS-524/2021    | EPI_ISL_1302221 | 03/02/2021 | Mexico City     | Human | Female | 25 | Ambulatory   | Original | Nasopharyngeal and oropharyngeal swab |
| hCoV-19/Mexico/CMX-IBT-IMSS-586/2021    | EPI_ISL_1302244 | 03/02/2021 | Mexico City     | Human | Male   | 53 | Ambulatory   | Original | Nasopharyngeal and oropharyngeal swab |
| hCoV-19/Mexico/CMX-IBT-IMSS-566/2021    | EPI_ISL_1302392 | 03/02/2021 | Mexico City     | Human | Female | 76 | Hospitalized | Original | Nasopharyngeal and oropharyngeal swab |
| hCoV-19/Mexico/HID-IBT-IMSS-265/2021    | EPI_ISL_1288453 | 05/02/2021 | Hidalgo         | Human | Female | 73 | Hospitalized | Original | Nasopharyngeal and oropharyngeal swab |
| hCoV-19/Mexico/ZAC-INER-IMSS-00017/2021 | EPI_ISL_1279319 | 05/02/2021 | Zacatecas       | Human | Female | 45 | Ambulatory   | Original | Nasopharyngeal and oropharyngeal swab |
| hCoV-19/Mexico/MEX-IBT-IMSS-214/2021    | EPI_ISL_1288410 | 06/02/2021 | State of Mexico | Human | Male   | 73 | Hospitalized | Original | Nasopharyngeal and oropharyngeal swab |
| hCoV-19/Mexico/ZAC-INER-IMSS-00007/2021 | EPI_ISL_1279310 | 06/02/2021 | Zacatecas       | Human | Male   | 82 | Ambulatory   | Original | Nasopharyngeal and oropharyngeal swab |

|                                         |                 |            |                     |       |        |    |              |          |                                       |
|-----------------------------------------|-----------------|------------|---------------------|-------|--------|----|--------------|----------|---------------------------------------|
| hCoV-19/Mexico/MOR-IBT-IMSS-103/2021    | EPI_ISL_1288167 | 07/02/2021 | Morelos             | Human | Male   | 70 | Hospitalized | Original | Nasopharyngeal and oropharyngeal swab |
| hCoV-19/Mexico/GRO-IBT-IMSS-215/2021    | EPI_ISL_1288178 | 07/02/2021 | Guerrero            | Human | Male   | 79 | Hospitalized | Original | Oropharyngeal swab                    |
| hCoV-19/Mexico/ZAC-INER-IMSS-00002/2021 | EPI_ISL_1279305 | 07/02/2021 | Zacatecas           | Human | Female | 22 | Ambulatory   | Original | Nasopharyngeal and oropharyngeal swab |
| hCoV-19/Mexico/ZAC-INER-IMSS-00008/2021 | EPI_ISL_1279311 | 07/02/2021 | Zacatecas           | Human | Female | 74 | Hospitalized | Original | Nasopharyngeal and oropharyngeal swab |
| hCoV-19/Mexico/ZAC-INER-IMSS-00010/2021 | EPI_ISL_1279281 | 08/02/2021 | Zacatecas           | Human | Female | 20 | Ambulatory   | Original | Nasopharyngeal and oropharyngeal swab |
| hCoV-19/Mexico/OAX-IBT-IMSS-136/2021    | EPI_ISL_1288170 | 08/02/2021 | Oaxaca              | Human | Female | 30 | Ambulatory   | Original | Nasopharyngeal and oropharyngeal swab |
| hCoV-19/Mexico/OAX-IBT-IMSS-148/2021    | EPI_ISL_1288171 | 08/02/2021 | Oaxaca              | Human | Male   | 46 | Ambulatory   | Original | Nasopharyngeal and oropharyngeal swab |
| hCoV-19/Mexico/OAX-IBT-IMSS-159/2021    | EPI_ISL_1288172 | 08/02/2021 | Oaxaca              | Human | Female | 68 | Hospitalized | Original | Nasopharyngeal and oropharyngeal swab |
| hCoV-19/Mexico/COA-INER-IMSS-00193/2021 | EPI_ISL_1279464 | 08/02/2021 | Coahuila            | Human | Female | 57 | Hospitalized | Original | Nasopharyngeal and oropharyngeal swab |
| hCoV-19/Mexico/DUR-INER-IMSS-00194/2021 | EPI_ISL_1279465 | 08/02/2021 | Durango             | Human | Female | 35 | Ambulatory   | Original | Nasopharyngeal and oropharyngeal swab |
| hCoV-19/Mexico/CHH-INER-IMSS-00195/2021 | EPI_ISL_1279466 | 08/02/2021 | Chihuahua           | Human | Female | 30 | Hospitalized | Original | Nasopharyngeal and oropharyngeal swab |
| hCoV-19/Mexico/DUR-INER-IMSS-00197/2021 | EPI_ISL_1279468 | 08/02/2021 | Durango             | Human | Female | 35 | Ambulatory   | Original | Nasopharyngeal and oropharyngeal swab |
| hCoV-19/Mexico/CHH-INER-IMSS-00219/2021 | EPI_ISL_1279485 | 08/02/2021 | Chihuahua           | Human | Female | 68 | Hospitalized | Original | Nasopharyngeal and oropharyngeal swab |
| hCoV-19/Mexico/BCS-IBT-IMSS-97/2021     | EPI_ISL_1288309 | 08/02/2021 | Baja California Sur | Human | Female | 37 | Ambulatory   | Original | Nasopharyngeal and oropharyngeal swab |
| hCoV-19/Mexico/BCS-IBT-IMSS-98/2021     | EPI_ISL_1288310 | 08/02/2021 | Baja California Sur | Human | Male   | 35 | Ambulatory   | Original | Nasopharyngeal and oropharyngeal swab |
| hCoV-19/Mexico/BCS-IBT-IMSS-101/2021    | EPI_ISL_1288312 | 08/02/2021 | Baja California Sur | Human | Female | 45 | Hospitalized | Original | Nasopharyngeal and oropharyngeal swab |
| hCoV-19/Mexico/ZAC-INER-IMSS-00001/2021 | EPI_ISL_1279304 | 08/02/2021 | Zacatecas           | Human | Female | 34 | Ambulatory   | Original | Nasopharyngeal and oropharyngeal swab |
| hCoV-19/Mexico/ZAC-INER-IMSS-00003/2021 | EPI_ISL_1279306 | 08/02/2021 | Zacatecas           | Human | Male   | 66 | Ambulatory   | Original | Nasopharyngeal and oropharyngeal swab |
| hCoV-19/Mexico/ZAC-INER-IMSS-00004/2021 | EPI_ISL_1279307 | 08/02/2021 | Zacatecas           | Human | Male   | 20 | Ambulatory   | Original | Nasopharyngeal and oropharyngeal swab |
| hCoV-19/Mexico/ZAC-INER-IMSS-00005/2021 | EPI_ISL_1279308 | 08/02/2021 | Zacatecas           | Human | Female | 20 | Ambulatory   | Original | Nasopharyngeal and oropharyngeal swab |
| hCoV-19/Mexico/ZAC-INER-IMSS-00006/2021 | EPI_ISL_1279309 | 08/02/2021 | Zacatecas           | Human | Female | 25 | Ambulatory   | Original | Nasopharyngeal and oropharyngeal swab |
| hCoV-19/Mexico/ZAC-INER-IMSS-00009/2021 | EPI_ISL_1279312 | 08/02/2021 | Zacatecas           | Human | Male   | 54 | Hospitalized | Original | Nasopharyngeal and oropharyngeal swab |
| hCoV-19/Mexico/MOR-IBT-IMSS-386/2021    | EPI_ISL_1288213 | 08/02/2021 | Morelos             | Human | Male   | 76 | Hospitalized | Original | Nasopharyngeal and oropharyngeal swab |
| hCoV-19/Mexico/MOR-IBT-IMSS-387/2021    | EPI_ISL_1288214 | 08/02/2021 | Morelos             | Human | Female | 79 | Hospitalized | Original | Nasopharyngeal and oropharyngeal swab |
| hCoV-19/Mexico/MOR-IBT-IMSS-388/2021    | EPI_ISL_1288215 | 08/02/2021 | Morelos             | Human | Female | 67 | HOSPITALIZED | Original | Nasopharyngeal and oropharyngeal swab |
| hCoV-19/Mexico/PUE-IBT-IMSS-61/2021     | EPI_ISL_1288277 | 08/02/2021 | Puebla              | Human | Female | 69 | Ambulatory   | Original | Nasopharyngeal and oropharyngeal swab |
| hCoV-19/Mexico/VER-IBT-IMSS-80/2021     | EPI_ISL_1288295 | 08/02/2021 | Veracruz            | Human | Male   | 66 | Hospitalized | Original | Nasopharyngeal and oropharyngeal swab |
| hCoV-19/Mexico/AGU-IBT-IMSS-238/2021    | EPI_ISL_1288154 | 09/02/2021 | Aguascalientes      | Human | Female | 47 | Ambulatory   | Original | Nasopharyngeal and oropharyngeal swab |
| hCoV-19/Mexico/AGU-IBT-IMSS-348/2021    | EPI_ISL_1288155 | 09/02/2021 | Aguascalientes      | Human | Female | 19 | Ambulatory   | Original | Nasopharyngeal and oropharyngeal swab |
| hCoV-19/Mexico/MOR-IBT-IMSS-370/2021    | EPI_ISL_1288156 | 09/02/2021 | Morelos             | Human | Male   | 84 | Hospitalized | Original | Nasopharyngeal and oropharyngeal swab |
| hCoV-19/Mexico/MOR-IBT-IMSS-381/2021    | EPI_ISL_1288157 | 09/02/2021 | Morelos             | Human | Female | 58 | Hospitalized | Original | Nasopharyngeal and oropharyngeal swab |
| hCoV-19/Mexico/MOR-IBT-IMSS-392/2021    | EPI_ISL_1288158 | 09/02/2021 | Morelos             | Human | Male   | 33 | Ambulatory   | Original | Nasopharyngeal and oropharyngeal swab |
| hCoV-19/Mexico/MOR-IBT-IMSS-414/2021    | EPI_ISL_1288160 | 09/02/2021 | Morelos             | Human | Male   | 77 | Hospitalized | Original | Nasopharyngeal and oropharyngeal swab |
| hCoV-19/Mexico/OAX-IBT-IMSS-425/2021    | EPI_ISL_1288161 | 09/02/2021 | Oaxaca              | Human | Female | 37 | Ambulatory   | Original | Nasopharyngeal and oropharyngeal swab |
| hCoV-19/Mexico/OAX-IBT-IMSS-37/2021     | EPI_ISL_1288162 | 09/02/2021 | Oaxaca              | Human | Male   | 40 | Ambulatory   | Original | Nasopharyngeal and oropharyngeal swab |
| hCoV-19/Mexico/OAX-IBT-IMSS-48/2021     | EPI_ISL_1288163 | 09/02/2021 | Oaxaca              | Human | Male   | 53 | Ambulatory   | Original | Nasopharyngeal and oropharyngeal swab |
| hCoV-19/Mexico/OAX-IBT-IMSS-59/2021     | EPI_ISL_1288164 | 09/02/2021 | Oaxaca              | Human | Female | 26 | Ambulatory   | Original | Nasopharyngeal and oropharyngeal swab |
| hCoV-19/Mexico/MOR-IBT-IMSS-92/2021     | EPI_ISL_1288166 | 09/02/2021 | Morelos             | Human | Female | 69 | Hospitalized | Original | Nasopharyngeal and oropharyngeal swab |
| hCoV-19/Mexico/OAX-IBT-IMSS-114/2021    | EPI_ISL_1288168 | 09/02/2021 | Oaxaca              | Human | Female | 22 | Ambulatory   | Original | Nasopharyngeal and oropharyngeal swab |
| hCoV-19/Mexico/OAX-IBT-IMSS-125/2021    | EPI_ISL_1288169 | 09/02/2021 | Oaxaca              | Human | Male   | 38 | Ambulatory   | Original | Nasopharyngeal and oropharyngeal swab |
| hCoV-19/Mexico/OAX-IBT-IMSS-170/2021    | EPI_ISL_1288173 | 09/02/2021 | Oaxaca              | Human | Male   | 30 | Ambulatory   | Original | Nasopharyngeal and oropharyngeal swab |



|                                         |                 |            |                     |       |        |    |              |          |                                       |
|-----------------------------------------|-----------------|------------|---------------------|-------|--------|----|--------------|----------|---------------------------------------|
| hCoV-19/Mexico/OAX-IBT-IMSS-171/2021    | EPI_ISL_1288174 | 09/02/2021 | Oaxaca              | Human | Female | 30 | Ambulatory   | Original | Nasopharyngeal and oropharyngeal swab |
| hCoV-19/Mexico/GRO-IBT-IMSS-182/2021    | EPI_ISL_1288175 | 09/02/2021 | Guerrero            | Human | Male   | 59 | Hospitalized | Original | Nasopharyngeal and oropharyngeal swab |
| hCoV-19/Mexico/GRO-IBT-IMSS-193/2021    | EPI_ISL_1288176 | 09/02/2021 | Guerrero            | Human | Male   | 36 | Ambulatory   | Original | Nasopharyngeal and oropharyngeal swab |
| hCoV-19/Mexico/GRO-IBT-IMSS-204/2021    | EPI_ISL_1288177 | 09/02/2021 | Guerrero            | Human | Male   | 29 | Ambulatory   | Original | Nasopharyngeal and oropharyngeal swab |
| hCoV-19/Mexico/BCS-IBT-IMSS-282/2021    | EPI_ISL_1288182 | 09/02/2021 | Baja California Sur | Human | Male   | 36 | Ambulatory   | Original | Oropharyngeal swab                    |
| hCoV-19/Mexico/SLP-IBT-IMSS-303/2021    | EPI_ISL_1288184 | 09/02/2021 | San Luis Potosi     | Human | Male   | 71 | Hospitalized | Original | Nasopharyngeal and oropharyngeal swab |
| hCoV-19/Mexico/CMX-IBT-IMSS-217/2021    | EPI_ISL_1288412 | 09/02/2021 | Mexico City         | Human | Female | 67 | Hospitalized | Original | Nasopharyngeal and oropharyngeal swab |
| hCoV-19/Mexico/NLE-INER-IMSS-00192/2021 | EPI_ISL_1279463 | 09/02/2021 | Nuevo Leon          | Human | Female | 0  | Hospitalized | Original | Nasopharyngeal and oropharyngeal swab |
| hCoV-19/Mexico/DUR-INER-IMSS-00196/2021 | EPI_ISL_1279467 | 09/02/2021 | Durango             | Human | Female | 49 | Ambulatory   | Original | Nasopharyngeal and oropharyngeal swab |
| hCoV-19/Mexico/COA-INER-IMSS-00199/2021 | EPI_ISL_1279470 | 09/02/2021 | Coahuila            | Human | Female | 44 | Ambulatory   | Original | Nasopharyngeal and oropharyngeal swab |
| hCoV-19/Mexico/TAM-INER-IMSS-00208/2021 | EPI_ISL_1279475 | 09/02/2021 | Tamaulipas          | Human | Male   | 32 | Ambulatory   | Original | Nasopharyngeal and oropharyngeal swab |
| hCoV-19/Mexico/BCS-IBT-IMSS-96/2021     | EPI_ISL_1288308 | 09/02/2021 | Baja California Sur | Human | Male   | 34 | Ambulatory   | Original | Nasopharyngeal and oropharyngeal swab |
| hCoV-19/Mexico/ZAC-INER-IMSS-00011/2021 | EPI_ISL_1279313 | 09/02/2021 | Zacatecas           | Human | Female | 49 | Ambulatory   | Original | Nasopharyngeal and oropharyngeal swab |
| hCoV-19/Mexico/ZAC-INER-IMSS-00012/2021 | EPI_ISL_1279314 | 09/02/2021 | Zacatecas           | Human | Female | 44 | Ambulatory   | Original | Nasopharyngeal and oropharyngeal swab |
| hCoV-19/Mexico/ZAC-INER-IMSS-00013/2021 | EPI_ISL_1279315 | 09/02/2021 | Zacatecas           | Human | Male   | 31 | Ambulatory   | Original | Nasopharyngeal and oropharyngeal swab |
| hCoV-19/Mexico/ZAC-INER-IMSS-00014/2021 | EPI_ISL_1279316 | 09/02/2021 | Zacatecas           | Human | Female | 84 | Hospitalized | Original | Nasopharyngeal and oropharyngeal swab |
| hCoV-19/Mexico/ZAC-INER-IMSS-00015/2021 | EPI_ISL_1279317 | 09/02/2021 | Zacatecas           | Human | Female | 66 | Ambulatory   | Original | Nasopharyngeal and oropharyngeal swab |
| hCoV-19/Mexico/ZAC-INER-IMSS-00021/2021 | EPI_ISL_1279323 | 09/02/2021 | Zacatecas           | Human | Female | 39 | Ambulatory   | Original | Nasopharyngeal and oropharyngeal swab |
| hCoV-19/Mexico/MOR-IBT-IMSS-389/2021    | EPI_ISL_1288216 | 09/02/2021 | Morelos             | Human | Male   | 67 | Ambulatory   | Original | Nasopharyngeal and oropharyngeal swab |
| hCoV-19/Mexico/MOR-IBT-IMSS-390/2021    | EPI_ISL_1288217 | 09/02/2021 | Morelos             | Human | Male   | 33 | Hospitalized | Original | Nasopharyngeal and oropharyngeal swab |
| hCoV-19/Mexico/GRO-IBT-IMSS-394/2021    | EPI_ISL_1288220 | 09/02/2021 | Guerrero            | Human | Male   | 46 | Ambulatory   | Original | Nasopharyngeal and oropharyngeal swab |
| hCoV-19/Mexico/GRO-IBT-IMSS-395/2021    | EPI_ISL_1288221 | 09/02/2021 | Guerrero            | Human | Female | 35 | Ambulatory   | Original | Nasopharyngeal and oropharyngeal swab |
| hCoV-19/Mexico/GRO-IBT-IMSS-401/2021    | EPI_ISL_1288225 | 09/02/2021 | Guerrero            | Human | Male   | 25 | Ambulatory   | Original | Nasopharyngeal and oropharyngeal swab |
| hCoV-19/Mexico/GRO-IBT-IMSS-404/2021    | EPI_ISL_1288226 | 09/02/2021 | Guerrero            | Human | Female | 38 | Ambulatory   | Original | Nasopharyngeal and oropharyngeal swab |
| hCoV-19/Mexico/GRO-IBT-IMSS-405/2021    | EPI_ISL_1288227 | 09/02/2021 | Guerrero            | Human | Female | 70 | Ambulatory   | Original | Nasopharyngeal and oropharyngeal swab |
| hCoV-19/Mexico/GRO-IBT-IMSS-406/2021    | EPI_ISL_1288228 | 09/02/2021 | Guerrero            | Human | Female | 53 | Ambulatory   | Original | Nasopharyngeal and oropharyngeal swab |
| hCoV-19/Mexico/GRO-IBT-IMSS-407/2021    | EPI_ISL_1288229 | 09/02/2021 | Guerrero            | Human | Male   | 32 | Ambulatory   | Original | Nasopharyngeal and oropharyngeal swab |
| hCoV-19/Mexico/GRO-IBT-IMSS-408/2021    | EPI_ISL_1288230 | 09/02/2021 | Guerrero            | Human | Female | 51 | Ambulatory   | Original | Nasopharyngeal and oropharyngeal swab |
| hCoV-19/Mexico/GRO-IBT-IMSS-409/2021    | EPI_ISL_1288231 | 09/02/2021 | Guerrero            | Human | Female | 41 | Ambulatory   | Original | Nasopharyngeal and oropharyngeal swab |
| hCoV-19/Mexico/GRO-IBT-IMSS-410/2021    | EPI_ISL_1288232 | 09/02/2021 | Guerrero            | Human | Female | 27 | Ambulatory   | Original | Nasopharyngeal and oropharyngeal swab |
| hCoV-19/Mexico/GRO-IBT-IMSS-411/2021    | EPI_ISL_1288233 | 09/02/2021 | Guerrero            | Human | Female | 58 | Ambulatory   | Original | Nasopharyngeal and oropharyngeal swab |
| hCoV-19/Mexico/GRO-IBT-IMSS-412/2021    | EPI_ISL_1288234 | 09/02/2021 | Guerrero            | Human | Female | 46 | Ambulatory   | Original | Nasopharyngeal and oropharyngeal swab |
| hCoV-19/Mexico/GRO-IBT-IMSS-413/2021    | EPI_ISL_1288235 | 09/02/2021 | Guerrero            | Human | Male   | 71 | Ambulatory   | Original | Nasopharyngeal and oropharyngeal swab |
| hCoV-19/Mexico/GRO-IBT-IMSS-415/2021    | EPI_ISL_1288236 | 09/02/2021 | Guerrero            | Human | Female | 46 | Ambulatory   | Original | Nasopharyngeal and oropharyngeal swab |
| hCoV-19/Mexico/GRO-IBT-IMSS-416/2021    | EPI_ISL_1288237 | 09/02/2021 | Guerrero            | Human | Male   | 39 | Ambulatory   | Original | Nasopharyngeal and oropharyngeal swab |
| hCoV-19/Mexico/GRO-IBT-IMSS-417/2021    | EPI_ISL_1288238 | 09/02/2021 | Guerrero            | Human | Male   | 30 | Ambulatory   | Original | Nasopharyngeal and oropharyngeal swab |
| hCoV-19/Mexico/VER-IBT-IMSS-83/2021     | EPI_ISL_1288297 | 09/02/2021 | Veracruz            | Human | Male   | 72 | Hospitalized | Original | Nasopharyngeal and oropharyngeal swab |
| hCoV-19/Mexico/CHH-INER-IMSS-00220/2021 | EPI_ISL_1279266 | 10/02/2021 | Chihuahua           | Human | Male   | 41 | Hospitalized | Original | Nasopharyngeal swab                   |
| hCoV-19/Mexico/ZAC-INER-IMSS-00023/2021 | EPI_ISL_1287761 | 10/02/2021 | Zacatecas           | Human | Female | 59 | Ambulatory   | Original | Nasopharyngeal and oropharyngeal swab |
| hCoV-19/Mexico/TLA-IBT-IMSS-137/2021    | EPI_ISL_1288153 | 10/02/2021 | Tlaxcala            | Human | Female | 48 | Ambulatory   | Original | Nasopharyngeal and oropharyngeal swab |
| hCoV-19/Mexico/MOR-IBT-IMSS-403/2021    | EPI_ISL_1288159 | 10/02/2021 | Morelos             | Human | Male   | 50 | Ambulatory   | Original | Nasopharyngeal and oropharyngeal swab |



|                                          |                 |            |                     |       |        |    |              |          |                                       |
|------------------------------------------|-----------------|------------|---------------------|-------|--------|----|--------------|----------|---------------------------------------|
| hCoV-19/Mexico/MOR-IBT-IMSS-81/2021      | EPI_ISL_1288165 | 10/02/2021 | Morelos             | Human | Male   | 31 | Ambulatory   | Original | Nasopharyngeal and oropharyngeal swab |
| hCoV-19/Mexico/BCS-IBT-IMSS-226/2021     | EPI_ISL_1288179 | 10/02/2021 | Baja California Sur | Human | Male   | 56 | Ambulatory   | Original | Nasopharyngeal and oropharyngeal swab |
| hCoV-19/Mexico/BCS-IBT-IMSS-237/2021     | EPI_ISL_1288180 | 10/02/2021 | Baja California Sur | Human | Male   | 54 | Ambulatory   | Original | Nasopharyngeal and oropharyngeal swab |
| hCoV-19/Mexico/BCS-IBT-IMSS-260/2021     | EPI_ISL_1288181 | 10/02/2021 | Baja California Sur | Human | Female | 42 | Ambulatory   | Original | Nasopharyngeal and oropharyngeal swab |
| hCoV-19/Mexico/SLP-IBT-IMSS-292/2021     | EPI_ISL_1288183 | 10/02/2021 | San Luis Potosi     | Human | Male   | 59 | Hospitalized | Original | Nasopharyngeal and oropharyngeal swab |
| hCoV-19/Mexico/SLP-IBT-IMSS-314/2021     | EPI_ISL_1288185 | 10/02/2021 | San Luis Potosi     | Human | Male   | 57 | Ambulatory   | Original | Nasopharyngeal and oropharyngeal swab |
| hCoV-19/Mexico/SLP-IBT-IMSS-325/2021     | EPI_ISL_1288186 | 10/02/2021 | San Luis Potosi     | Human | Female | 30 | Ambulatory   | Original | Nasopharyngeal and oropharyngeal swab |
| hCoV-19/Mexico/SLP-IBT-IMSS-336/2021     | EPI_ISL_1288187 | 10/02/2021 | San Luis Potosi     | Human | Male   | 21 | Ambulatory   | Original | Nasopharyngeal and oropharyngeal swab |
| hCoV-19/Mexico/SLP-IBT-IMSS-347/2021     | EPI_ISL_1288188 | 10/02/2021 | San Luis Potosi     | Human | Male   | 32 | Ambulatory   | Original | Nasopharyngeal and oropharyngeal swab |
| hCoV-19/Mexico/CMX-IBT-IMSS-359/2021     | EPI_ISL_1288189 | 10/02/2021 | Mexico City         | Human | Female | 23 | Ambulatory   | Original | Nasopharyngeal and oropharyngeal swab |
| hCoV-19/Mexico/CMX-IBT-IMSS-361/2021     | EPI_ISL_1288190 | 10/02/2021 | Mexico City         | Human | Female | 27 | Ambulatory   | Original | Nasopharyngeal and oropharyngeal swab |
| hCoV-19/Mexico/CMX-IBT-IMSS-362/2021     | EPI_ISL_1288191 | 10/02/2021 | Mexico City         | Human | Female | 39 | Ambulatory   | Original | Nasopharyngeal and oropharyngeal swab |
| hCoV-19/Mexico/ROO-INNER-IMSS-00359/2021 | EPI_ISL_1279604 | 10/02/2021 | Quintana Roo        | Human | Male   | 75 | Hospitalized | Original | Nasopharyngeal and oropharyngeal swab |
| hCoV-19/Mexico/MEX-IBT-IMSS-213/2021     | EPI_ISL_1288409 | 10/02/2021 | State of Mexico     | Human | Male   | 28 | Ambulatory   | Original | Nasopharyngeal and oropharyngeal swab |
| hCoV-19/Mexico/BCS-IBT-IMSS-242/2021     | EPI_ISL_1288431 | 10/02/2021 | Baja California Sur | Human | Female | 28 | Ambulatory   | Original | Nasopharyngeal and oropharyngeal swab |
| hCoV-19/Mexico/BCS-IBT-IMSS-243/2021     | EPI_ISL_1288432 | 10/02/2021 | Baja California Sur | Human | Female | 26 | Ambulatory   | Original | Nasopharyngeal and oropharyngeal swab |
| hCoV-19/Mexico/BCS-IBT-IMSS-244/2021     | EPI_ISL_1288433 | 10/02/2021 | Baja California Sur | Human | Female | 29 | Ambulatory   | Original | Nasopharyngeal and oropharyngeal swab |
| hCoV-19/Mexico/BCS-IBT-IMSS-245/2021     | EPI_ISL_1288434 | 10/02/2021 | Baja California Sur | Human | Female | 27 | Ambulatory   | Original | Nasopharyngeal and oropharyngeal swab |
| hCoV-19/Mexico/ROO-INNER-IMSS-00164/2021 | EPI_ISL_1279440 | 10/02/2021 | Quintana Roo        | Human | Female | 62 | Ambulatory   | Original | Nasopharyngeal and oropharyngeal swab |
| hCoV-19/Mexico/DUR-INNER-IMSS-00198/2021 | EPI_ISL_1279469 | 10/02/2021 | Durango             | Human | Male   | 53 | Hospitalized | Original | Nasopharyngeal and oropharyngeal swab |
| hCoV-19/Mexico/NLE-INNER-IMSS-00203/2021 | EPI_ISL_1279472 | 10/02/2021 | Nuevo Leon          | Human | Female | 39 | Ambulatory   | Original | Nasopharyngeal and oropharyngeal swab |
| hCoV-19/Mexico/TAM-INNER-IMSS-00209/2021 | EPI_ISL_1279476 | 10/02/2021 | Tamaulipas          | Human | Female | 37 | Ambulatory   | Original | Nasopharyngeal and oropharyngeal swab |
| hCoV-19/Mexico/COA-INNER-IMSS-00212/2021 | EPI_ISL_1279478 | 10/02/2021 | Coahuila            | Human | Female | 18 | Ambulatory   | Original | Nasopharyngeal swab                   |
| hCoV-19/Mexico/SLP-INNER-IMSS-00218/2021 | EPI_ISL_1279484 | 10/02/2021 | San Luis Potosi     | Human | Female | 71 | Ambulatory   | Original | Nasopharyngeal and oropharyngeal swab |
| hCoV-19/Mexico/VER-IBT-IMSS-86/2021      | EPI_ISL_1288300 | 10/02/2021 | Veracruz            | Human | Female | 68 | Ambulatory   | Original | Nasopharyngeal swab                   |
| hCoV-19/Mexico/VER-IBT-IMSS-87/2021      | EPI_ISL_1288301 | 10/02/2021 | Veracruz            | Human | Female | 43 | Ambulatory   | Original | Nasopharyngeal swab                   |
| hCoV-19/Mexico/VER-IBT-IMSS-88/2021      | EPI_ISL_1288302 | 10/02/2021 | Veracruz            | Human | Male   | 53 | Ambulatory   | Original | Nasopharyngeal and oropharyngeal swab |
| hCoV-19/Mexico/VER-IBT-IMSS-89/2021      | EPI_ISL_1288303 | 10/02/2021 | Veracruz            | Human | Male   | 32 | Ambulatory   | Original | Nasopharyngeal and oropharyngeal swab |
| hCoV-19/Mexico/VER-IBT-IMSS-90/2021      | EPI_ISL_1288304 | 10/02/2021 | Veracruz            | Human | Male   | 44 | Ambulatory   | Original | Nasopharyngeal and oropharyngeal swab |
| hCoV-19/Mexico/VER-IBT-IMSS-91/2021      | EPI_ISL_1288305 | 10/02/2021 | Veracruz            | Human | Male   | 40 | Ambulatory   | Original | Nasopharyngeal and oropharyngeal swab |
| hCoV-19/Mexico/VER-IBT-IMSS-93/2021      | EPI_ISL_1288306 | 10/02/2021 | Veracruz            | Human | Male   | 20 | Ambulatory   | Original | Nasopharyngeal and oropharyngeal swab |
| hCoV-19/Mexico/VER-IBT-IMSS-100/2021     | EPI_ISL_1288311 | 10/02/2021 | Veracruz            | Human | Female | 72 | Hospitalized | Original | Nasopharyngeal and oropharyngeal swab |
| hCoV-19/Mexico/VER-IBT-IMSS-105/2021     | EPI_ISL_1288315 | 10/02/2021 | Veracruz            | Human | Male   | 77 | Ambulatory   | Original | Nasopharyngeal and oropharyngeal swab |
| hCoV-19/Mexico/VER-IBT-IMSS-110/2021     | EPI_ISL_1288319 | 10/02/2021 | Veracruz            | Human | Female | 35 | Ambulatory   | Original | Nasopharyngeal and oropharyngeal swab |
| hCoV-19/Mexico/VER-IBT-IMSS-111/2021     | EPI_ISL_1288320 | 10/02/2021 | Veracruz            | Human | Female | 23 | Ambulatory   | Original | Nasopharyngeal and oropharyngeal swab |
| hCoV-19/Mexico/VER-IBT-IMSS-112/2021     | EPI_ISL_1288321 | 10/02/2021 | Veracruz            | Human | Male   | 48 | Ambulatory   | Original | Nasopharyngeal and oropharyngeal swab |
| hCoV-19/Mexico/VER-IBT-IMSS-113/2021     | EPI_ISL_1288322 | 10/02/2021 | Veracruz            | Human | Male   | 33 | Ambulatory   | Original | Nasopharyngeal and oropharyngeal swab |
| hCoV-19/Mexico/VER-IBT-IMSS-115/2021     | EPI_ISL_1288323 | 10/02/2021 | Veracruz            | Human | Male   | 43 | Ambulatory   | Original | Nasopharyngeal and oropharyngeal swab |
| hCoV-19/Mexico/VER-IBT-IMSS-116/2021     | EPI_ISL_1288324 | 10/02/2021 | Veracruz            | Human | Male   | 80 | Ambulatory   | Original | Nasopharyngeal and oropharyngeal swab |
| hCoV-19/Mexico/VER-IBT-IMSS-117/2021     | EPI_ISL_1288325 | 10/02/2021 | Veracruz            | Human | Female | 23 | Ambulatory   | Original | Nasopharyngeal and oropharyngeal swab |
| hCoV-19/Mexico/CHP-IBT-IMSS-118/2021     | EPI_ISL_1288326 | 10/02/2021 | Chiapas             | Human | Male   | 44 | Ambulatory   | Original | Nasopharyngeal and oropharyngeal swab |

|                                         |                 |            |                 |       |        |    |              |          |                                       |
|-----------------------------------------|-----------------|------------|-----------------|-------|--------|----|--------------|----------|---------------------------------------|
| hCoV-19/Mexico/PUE-IBT-IMSS-120/2021    | EPI_ISL_1288328 | 10/02/2021 | Puebla          | Human | Female | 38 | Ambulatory   | Original | Nasopharyngeal and oropharyngeal swab |
| hCoV-19/Mexico/CHP-IBT-IMSS-123/2021    | EPI_ISL_1288330 | 10/02/2021 | Chiapas         | Human | Female | 28 | Ambulatory   | Original | Nasopharyngeal and oropharyngeal swab |
| hCoV-19/Mexico/PUE-IBT-IMSS-126/2021    | EPI_ISL_1288332 | 10/02/2021 | Puebla          | Human | Male   | 33 | Ambulatory   | Original | Nasopharyngeal and oropharyngeal swab |
| hCoV-19/Mexico/PUE-IBT-IMSS-129/2021    | EPI_ISL_1288335 | 10/02/2021 | Puebla          | Human | Male   | 29 | Ambulatory   | Original | Nasopharyngeal and oropharyngeal swab |
| hCoV-19/Mexico/PUE-IBT-IMSS-130/2021    | EPI_ISL_1288336 | 10/02/2021 | Puebla          | Human | Female | 45 | Ambulatory   | Original | Nasopharyngeal and oropharyngeal swab |
| hCoV-19/Mexico/PUE-IBT-IMSS-138/2021    | EPI_ISL_1288341 | 10/02/2021 | Puebla          | Human | Female | 29 | Ambulatory   | Original | Nasopharyngeal and oropharyngeal swab |
| hCoV-19/Mexico/PUE-IBT-IMSS-139/2021    | EPI_ISL_1288342 | 10/02/2021 | Puebla          | Human | Male   | 44 | Ambulatory   | Original | Oropharyngeal swab                    |
| hCoV-19/Mexico/PUE-IBT-IMSS-140/2021    | EPI_ISL_1288343 | 10/02/2021 | Puebla          | Human | Male   | 37 | Ambulatory   | Original | Nasopharyngeal and oropharyngeal swab |
| hCoV-19/Mexico/PUE-IBT-IMSS-141/2021    | EPI_ISL_1288344 | 10/02/2021 | Puebla          | Human | Female | 37 | Ambulatory   | Original | Nasopharyngeal and oropharyngeal swab |
| hCoV-19/Mexico/PUE-IBT-IMSS-143/2021    | EPI_ISL_1288346 | 10/02/2021 | Puebla          | Human | Female | 32 | Ambulatory   | Original | Nasopharyngeal and oropharyngeal swab |
| hCoV-19/Mexico/PUE-IBT-IMSS-144/2021    | EPI_ISL_1288347 | 10/02/2021 | Puebla          | Human | Male   | 62 | Ambulatory   | Original | Nasopharyngeal and oropharyngeal swab |
| hCoV-19/Mexico/GRO-IBT-IMSS-155/2021    | EPI_ISL_1288357 | 10/02/2021 | Guerrero        | Human | Male   | 52 | Ambulatory   | Original | Oropharyngeal swab                    |
| hCoV-19/Mexico/MEX-IBT-IMSS-177/2021    | EPI_ISL_1288376 | 10/02/2021 | State of Mexico | Human | Female | 44 | Ambulatory   | Original | Nasopharyngeal and oropharyngeal swab |
| hCoV-19/Mexico/MEX-IBT-IMSS-178/2021    | EPI_ISL_1288377 | 10/02/2021 | State of Mexico | Human | Male   | 24 | Ambulatory   | Original | Nasopharyngeal and oropharyngeal swab |
| hCoV-19/Mexico/MEX-IBT-IMSS-179/2021    | EPI_ISL_1288378 | 10/02/2021 | State of Mexico | Human | Female | 18 | Ambulatory   | Original | Nasopharyngeal and oropharyngeal swab |
| hCoV-19/Mexico/MEX-IBT-IMSS-180/2021    | EPI_ISL_1288379 | 10/02/2021 | State of Mexico | Human | Female | 24 | Ambulatory   | Original | Nasopharyngeal and oropharyngeal swab |
| hCoV-19/Mexico/MEX-IBT-IMSS-181/2021    | EPI_ISL_1288380 | 10/02/2021 | State of Mexico | Human | Female | 28 | Ambulatory   | Original | Nasopharyngeal and oropharyngeal swab |
| hCoV-19/Mexico/MEX-IBT-IMSS-183/2021    | EPI_ISL_1288381 | 10/02/2021 | State of Mexico | Human | Male   | 42 | Ambulatory   | Original | Nasopharyngeal and oropharyngeal swab |
| hCoV-19/Mexico/VER-IBT-IMSS-360/2021    | EPI_ISL_1288442 | 10/02/2021 | Veracruz        | Human | Male   | 51 | Ambulatory   | Original | Nasopharyngeal swab                   |
| hCoV-19/Mexico/VER-IBT-IMSS-255/2021    | EPI_ISL_1288444 | 10/02/2021 | Veracruz        | Human | Female | 48 | Ambulatory   | Original | Nasopharyngeal swab                   |
| hCoV-19/Mexico/ZAC-INER-IMSS-00016/2021 | EPI_ISL_1279318 | 10/02/2021 | Zacatecas       | Human | Female | 86 | Hospitalized | Original | Nasopharyngeal and oropharyngeal swab |
| hCoV-19/Mexico/ZAC-INER-IMSS-00018/2021 | EPI_ISL_1279320 | 10/02/2021 | Zacatecas       | Human | Male   | 40 | Ambulatory   | Original | Nasopharyngeal and oropharyngeal swab |
| hCoV-19/Mexico/ZAC-INER-IMSS-00019/2021 | EPI_ISL_1279321 | 10/02/2021 | Zacatecas       | Human | Male   | 24 | Ambulatory   | Original | Nasopharyngeal and oropharyngeal swab |
| hCoV-19/Mexico/ZAC-INER-IMSS-00022/2021 | EPI_ISL_1279324 | 10/02/2021 | Zacatecas       | Human | Female | 28 | Ambulatory   | Original | Nasopharyngeal and oropharyngeal swab |
| hCoV-19/Mexico/ZAC-INER-IMSS-00032/2021 | EPI_ISL_1279331 | 10/02/2021 | Zacatecas       | Human | Female | 35 | Ambulatory   | Original | Nasopharyngeal and oropharyngeal swab |
| hCoV-19/Mexico/QUE-IBT-IMSS-374/2021    | EPI_ISL_1288202 | 10/02/2021 | Queretaro       | Human | Female | 37 | Ambulatory   | Original | Nasopharyngeal and oropharyngeal swab |
| hCoV-19/Mexico/QUE-IBT-IMSS-375/2021    | EPI_ISL_1288203 | 10/02/2021 | Queretaro       | Human | Male   | 61 | Ambulatory   | Original | Nasopharyngeal and oropharyngeal swab |
| hCoV-19/Mexico/QUE-IBT-IMSS-376/2021    | EPI_ISL_1288204 | 10/02/2021 | Queretaro       | Human | Female | 65 | Ambulatory   | Original | Nasopharyngeal and oropharyngeal swab |
| hCoV-19/Mexico/MEX-IBT-IMSS-379/2021    | EPI_ISL_1288207 | 10/02/2021 | State of Mexico | Human | Female | 67 | Ambulatory   | Original | Nasopharyngeal swab                   |
| hCoV-19/Mexico/MEX-IBT-IMSS-380/2021    | EPI_ISL_1288208 | 10/02/2021 | State of Mexico | Human | Male   | 6  | Ambulatory   | Original | Nasopharyngeal swab                   |
| hCoV-19/Mexico/MEX-IBT-IMSS-383/2021    | EPI_ISL_1288210 | 10/02/2021 | State of Mexico | Human | Male   | 54 | Ambulatory   | Original | Oropharyngeal swab                    |
| hCoV-19/Mexico/GRO-IBT-IMSS-391/2021    | EPI_ISL_1288218 | 10/02/2021 | Guerrero        | Human | Male   | 75 | Hospitalized | Original | Nasopharyngeal and oropharyngeal swab |
| hCoV-19/Mexico/GRO-IBT-IMSS-396/2021    | EPI_ISL_1288222 | 10/02/2021 | Guerrero        | Human | Male   | 63 | Hospitalized | Original | Nasopharyngeal and oropharyngeal swab |
| hCoV-19/Mexico/OAX-IBT-IMSS-398/2021    | EPI_ISL_1288223 | 10/02/2021 | Oaxaca          | Human | Male   | 58 | Ambulatory   | Original | Nasopharyngeal and oropharyngeal swab |
| hCoV-19/Mexico/VER-IBT-IMSS-418/2021    | EPI_ISL_1288239 | 10/02/2021 | Veracruz        | Human | Female | 62 | Hospitalized | Original | Nasopharyngeal and oropharyngeal swab |
| hCoV-19/Mexico/VER-IBT-IMSS-419/2021    | EPI_ISL_1288240 | 10/02/2021 | Veracruz        | Human | Male   | 84 | Hospitalized | Original | Nasopharyngeal and oropharyngeal swab |
| hCoV-19/Mexico/VER-IBT-IMSS-420/2021    | EPI_ISL_1288241 | 10/02/2021 | Veracruz        | Human | Female | 41 | Ambulatory   | Original | Nasopharyngeal and oropharyngeal swab |
| hCoV-19/Mexico/VER-IBT-IMSS-421/2021    | EPI_ISL_1288242 | 10/02/2021 | Veracruz        | Human | Female | 67 | Ambulatory   | Original | Nasopharyngeal and oropharyngeal swab |
| hCoV-19/Mexico/ROO-IBT-IMSS-422/2021    | EPI_ISL_1288243 | 10/02/2021 | Quintana Roo    | Human | Female | 61 | Hospitalized | Original | Nasopharyngeal and oropharyngeal swab |
| hCoV-19/Mexico/VER-IBT-IMSS-423/2021    | EPI_ISL_1288244 | 10/02/2021 | Veracruz        | Human | Female | 21 | Ambulatory   | Original | Nasopharyngeal and oropharyngeal swab |
| hCoV-19/Mexico/VER-IBT-IMSS-424/2021    | EPI_ISL_1288245 | 10/02/2021 | Veracruz        | Human | Male   | 19 | Ambulatory   | Original | Nasopharyngeal and oropharyngeal swab |

|                                         |                 |            |                 |       |        |    |              |          |                                       |
|-----------------------------------------|-----------------|------------|-----------------|-------|--------|----|--------------|----------|---------------------------------------|
| hCoV-19/Mexico/MOR-IBT-IMSS-27/2021     | EPI_ISL_1288246 | 10/02/2021 | Morelos         | Human | Male   | 46 | Hospitalized | Original | Nasopharyngeal and oropharyngeal swab |
| hCoV-19/Mexico/PUE-IBT-IMSS-36/2021     | EPI_ISL_1288255 | 10/02/2021 | Puebla          | Human | Female | 9  | Ambulatory   | Original | Nasopharyngeal and oropharyngeal swab |
| hCoV-19/Mexico/PUE-IBT-IMSS-47/2021     | EPI_ISL_1288265 | 10/02/2021 | Puebla          | Human | Male   | 58 | Hospitalized | Original | Nasopharyngeal and oropharyngeal swab |
| hCoV-19/Mexico/PUE-IBT-IMSS-49/2021     | EPI_ISL_1288266 | 10/02/2021 | Puebla          | Human | Male   | 74 | Hospitalized | Original | Nasopharyngeal and oropharyngeal swab |
| hCoV-19/Mexico/PUE-IBT-IMSS-51/2021     | EPI_ISL_1288268 | 10/02/2021 | Puebla          | Human | Male   | 68 | Ambulatory   | Original | Nasopharyngeal and oropharyngeal swab |
| hCoV-19/Mexico/PUE-IBT-IMSS-56/2021     | EPI_ISL_1288273 | 10/02/2021 | Puebla          | Human | Male   | 47 | Ambulatory   | Original | Nasopharyngeal and oropharyngeal swab |
| hCoV-19/Mexico/PUE-IBT-IMSS-58/2021     | EPI_ISL_1288275 | 10/02/2021 | Puebla          | Human | Female | 38 | Ambulatory   | Original | Nasopharyngeal and oropharyngeal swab |
| hCoV-19/Mexico/PUE-IBT-IMSS-60/2021     | EPI_ISL_1288276 | 10/02/2021 | Puebla          | Human | Female | 67 | Hospitalized | Original | Nasopharyngeal and oropharyngeal swab |
| hCoV-19/Mexico/SLP-IBT-IMSS-72/2021     | EPI_ISL_1288287 | 10/02/2021 | San Luis Potosi | Human | Male   | 78 | Hospitalized | Original | Nasopharyngeal and oropharyngeal swab |
| hCoV-19/Mexico/SLP-IBT-IMSS-73/2021     | EPI_ISL_1288288 | 10/02/2021 | San Luis Potosi | Human | Female | 76 | Hospitalized | Original | Nasopharyngeal and oropharyngeal swab |
| hCoV-19/Mexico/SLP-IBT-IMSS-74/2021     | EPI_ISL_1288289 | 10/02/2021 | San Luis Potosi | Human | Male   | 42 | Hospitalized | Original | Nasopharyngeal and oropharyngeal swab |
| hCoV-19/Mexico/SLP-IBT-IMSS-75/2021     | EPI_ISL_1288290 | 10/02/2021 | San Luis Potosi | Human | Female | 39 | Ambulatory   | Original | Nasopharyngeal and oropharyngeal swab |
| hCoV-19/Mexico/SLP-IBT-IMSS-78/2021     | EPI_ISL_1288293 | 10/02/2021 | San Luis Potosi | Human | Male   | 34 | Ambulatory   | Original | Nasopharyngeal and oropharyngeal swab |
| hCoV-19/Mexico/VER-IBT-IMSS-79/2021     | EPI_ISL_1288294 | 10/02/2021 | Veracruz        | Human | Female | 62 | Hospitalized | Original | Nasopharyngeal and oropharyngeal swab |
| hCoV-19/Mexico/VER-IBT-IMSS-82/2021     | EPI_ISL_1288296 | 10/02/2021 | Veracruz        | Human | Female | 47 | Ambulatory   | Original | Nasopharyngeal and oropharyngeal swab |
| hCoV-19/Mexico/VER-IBT-IMSS-84/2021     | EPI_ISL_1288298 | 10/02/2021 | Veracruz        | Human | Male   | 22 | Ambulatory   | Original | Nasopharyngeal and oropharyngeal swab |
| hCoV-19/Mexico/VER-IBT-IMSS-85/2021     | EPI_ISL_1288299 | 10/02/2021 | Veracruz        | Human | Male   | 55 | Ambulatory   | Original | Nasopharyngeal swab                   |
| hCoV-19/Mexico/TAM-INER-IMSS-00200/2021 | EPI_ISL_1279264 | 11/02/2021 | Nuevo Leon      | Human | Female | 38 | Ambulatory   | Original | Nasopharyngeal and oropharyngeal swab |
| hCoV-19/Mexico/ZAC-INER-IMSS-00026/2021 | EPI_ISL_1279265 | 11/02/2021 | Zacatecas       | Human | Female | 39 | Ambulatory   | Original | Nasopharyngeal and oropharyngeal swab |
| hCoV-19/Mexico/ZAC-INER-IMSS-00025/2021 | EPI_ISL_1279271 | 11/02/2021 | Zacatecas       | Human | Male   | 33 | Ambulatory   | Original | Nasopharyngeal and oropharyngeal swab |
| hCoV-19/Mexico/CAM-INER-IMSS-00368/2021 | EPI_ISL_1279282 | 11/02/2021 | Campeche        | Human | Male   | 30 | Ambulatory   | Original | Nasopharyngeal and oropharyngeal swab |
| hCoV-19/Mexico/NLE-INER-IMSS-00202/2021 | EPI_ISL_1279287 | 11/02/2021 | Nuevo Leon      | Human | Male   | 50 | Ambulatory   | Original | Nasopharyngeal and oropharyngeal swab |
| hCoV-19/Mexico/NLE-INER-IMSS-00204/2021 | EPI_ISL_1279298 | 11/02/2021 | Nuevo Leon      | Human | Female | 24 | Ambulatory   | Original | Nasopharyngeal and oropharyngeal swab |
| hCoV-19/Mexico/COA-INER-IMSS-00207/2021 | EPI_ISL_1287771 | 11/02/2021 | Coahuila        | Human | Male   | 37 | Hospitalized | Original | Nasopharyngeal and oropharyngeal swab |
| hCoV-19/Mexico/CMX-IBT-IMSS-363/2021    | EPI_ISL_1288192 | 11/02/2021 | Mexico City     | Human | Female | 62 | Ambulatory   | Original | Nasopharyngeal and oropharyngeal swab |
| hCoV-19/Mexico/CMX-IBT-IMSS-367/2021    | EPI_ISL_1288196 | 11/02/2021 | Mexico City     | Human | Male   | 39 | Hospitalized | Original | Oropharyngeal swab                    |
| hCoV-19/Mexico/CMX-IBT-IMSS-368/2021    | EPI_ISL_1288197 | 11/02/2021 | Mexico City     | Human | Male   | 74 | Hospitalized | Original | Oropharyngeal swab                    |
| hCoV-19/Mexico/MEX-IBT-IMSS-369/2021    | EPI_ISL_1288198 | 11/02/2021 | State of Mexico | Human | Female | 63 | Hospitalized | Original | Oropharyngeal swab                    |
| hCoV-19/Mexico/MEX-IBT-IMSS-371/2021    | EPI_ISL_1288199 | 11/02/2021 | State of Mexico | Human | Male   | 72 | Hospitalized | Original | Oropharyngeal swab                    |
| hCoV-19/Mexico/ROO-INER-IMSS-00366/2021 | EPI_ISL_1279611 | 11/02/2021 | Quintana Roo    | Human | Male   | 31 | Ambulatory   | Original | Nasopharyngeal and oropharyngeal swab |
| hCoV-19/Mexico/ROO-INER-IMSS-00367/2021 | EPI_ISL_1279612 | 11/02/2021 | Quintana Roo    | Human | Female | 21 | Ambulatory   | Original | Nasopharyngeal and oropharyngeal swab |
| hCoV-19/Mexico/MEX-IBT-IMSS-203/2021    | EPI_ISL_1288400 | 11/02/2021 | State of Mexico | Human | Female | 32 | Ambulatory   | Original | Nasopharyngeal and oropharyngeal swab |
| hCoV-19/Mexico/MEX-IBT-IMSS-205/2021    | EPI_ISL_1288401 | 11/02/2021 | State of Mexico | Human | Male   | 59 | Hospitalized | Original | Nasopharyngeal and oropharyngeal swab |
| hCoV-19/Mexico/MEX-IBT-IMSS-206/2021    | EPI_ISL_1288402 | 11/02/2021 | State of Mexico | Human | Male   | 49 | Ambulatory   | Original | Nasopharyngeal and oropharyngeal swab |
| hCoV-19/Mexico/MEX-IBT-IMSS-207/2021    | EPI_ISL_1288403 | 11/02/2021 | State of Mexico | Human | Female | 66 | Hospitalized | Original | Nasopharyngeal and oropharyngeal swab |
| hCoV-19/Mexico/MEX-IBT-IMSS-208/2021    | EPI_ISL_1288404 | 11/02/2021 | State of Mexico | Human | Female | 57 | Ambulatory   | Original | Nasopharyngeal and oropharyngeal swab |
| hCoV-19/Mexico/MEX-IBT-IMSS-209/2021    | EPI_ISL_1288405 | 11/02/2021 | State of Mexico | Human | Female | 22 | Ambulatory   | Original | Nasopharyngeal and oropharyngeal swab |
| hCoV-19/Mexico/MEX-IBT-IMSS-210/2021    | EPI_ISL_1288406 | 11/02/2021 | State of Mexico | Human | Male   | 49 | Ambulatory   | Original | Nasopharyngeal and oropharyngeal swab |
| hCoV-19/Mexico/MEX-IBT-IMSS-211/2021    | EPI_ISL_1288407 | 11/02/2021 | State of Mexico | Human | Female | 39 | Ambulatory   | Original | Nasopharyngeal and oropharyngeal swab |
| hCoV-19/Mexico/MEX-IBT-IMSS-212/2021    | EPI_ISL_1288408 | 11/02/2021 | State of Mexico | Human | Male   | 39 | Ambulatory   | Original | Nasopharyngeal and oropharyngeal swab |
| hCoV-19/Mexico/QUE-IBT-IMSS-228/2021    | EPI_ISL_1288421 | 11/02/2021 | Queretaro       | Human | Female | 64 | Hospitalized | Original | Nasopharyngeal and oropharyngeal swab |

|                                         |                 |            |                     |       |        |    |              |          |                                       |
|-----------------------------------------|-----------------|------------|---------------------|-------|--------|----|--------------|----------|---------------------------------------|
| hCoV-19/Mexico/QUE-IBT-IMSS-229/2021    | EPI_ISL_1288422 | 11/02/2021 | Queretaro           | Human | Female | 86 | Hospitalized | Original | Nasopharyngeal and oropharyngeal swab |
| hCoV-19/Mexico/BCS-IBT-IMSS-230/2021    | EPI_ISL_1288423 | 11/02/2021 | Baja California Sur | Human | Female | 32 | Ambulatory   | Original | Nasopharyngeal and oropharyngeal swab |
| hCoV-19/Mexico/BCS-IBT-IMSS-231/2021    | EPI_ISL_1288424 | 11/02/2021 | Baja California Sur | Human | Male   | 31 | Ambulatory   | Original | Nasopharyngeal and oropharyngeal swab |
| hCoV-19/Mexico/BCS-IBT-IMSS-232/2021    | EPI_ISL_1288425 | 11/02/2021 | Baja California Sur | Human | Female | 32 | Ambulatory   | Original | Nasopharyngeal and oropharyngeal swab |
| hCoV-19/Mexico/BCS-IBT-IMSS-235/2021    | EPI_ISL_1288427 | 11/02/2021 | Baja California Sur | Human | Female | 40 | Ambulatory   | Original | Nasopharyngeal and oropharyngeal swab |
| hCoV-19/Mexico/BCS-IBT-IMSS-236/2021    | EPI_ISL_1288428 | 11/02/2021 | Baja California Sur | Human | Male   | 49 | Ambulatory   | Original | Nasopharyngeal and oropharyngeal swab |
| hCoV-19/Mexico/BCS-IBT-IMSS-239/2021    | EPI_ISL_1288429 | 11/02/2021 | Baja California Sur | Human | Male   | 27 | Ambulatory   | Original | Nasopharyngeal and oropharyngeal swab |
| hCoV-19/Mexico/BCS-IBT-IMSS-240/2021    | EPI_ISL_1288430 | 11/02/2021 | Baja California Sur | Human | Female | 33 | Ambulatory   | Original | Nasopharyngeal and oropharyngeal swab |
| hCoV-19/Mexico/CMX-IBT-IMSS-338/2021    | EPI_ISL_1288517 | 11/02/2021 | Mexico City         | Human | Male   | 60 | Hospitalized | Original | Nasopharyngeal and oropharyngeal swab |
| hCoV-19/Mexico/NLE-INER-IMSS-00201/2021 | EPI_ISL_1279471 | 11/02/2021 | Nuevo Leon          | Human | Female | 49 | Hospitalized | Original | Nasopharyngeal and oropharyngeal swab |
| hCoV-19/Mexico/NLE-INER-IMSS-00205/2021 | EPI_ISL_1279473 | 11/02/2021 | Nuevo Leon          | Human | Male   | 34 | Ambulatory   | Original | Nasopharyngeal and oropharyngeal swab |
| hCoV-19/Mexico/COA-INER-IMSS-00211/2021 | EPI_ISL_1279477 | 11/02/2021 | Coahuila            | Human | Female | 75 | Ambulatory   | Original | Nasopharyngeal and oropharyngeal swab |
| hCoV-19/Mexico/CHH-INER-IMSS-00260/2021 | EPI_ISL_1279522 | 11/02/2021 | Chihuahua           | Human | Female | 62 | Ambulatory   | Original | Pharyngeal swab                       |
| hCoV-19/Mexico/CHH-INER-IMSS-00261/2021 | EPI_ISL_1279523 | 11/02/2021 | Chihuahua           | Human | Male   | 25 | Ambulatory   | Original | Nasopharyngeal and oropharyngeal swab |
| hCoV-19/Mexico/CHP-IBT-IMSS-95/2021     | EPI_ISL_1288307 | 11/02/2021 | Chiapas             | Human | Female | 47 | Ambulatory   | Original | Nasopharyngeal and oropharyngeal swab |
| hCoV-19/Mexico/BCS-IBT-IMSS-102/2021    | EPI_ISL_1288313 | 11/02/2021 | Baja California Sur | Human | Male   | 52 | Ambulatory   | Original | Nasopharyngeal and oropharyngeal swab |
| hCoV-19/Mexico/BCS-IBT-IMSS-104/2021    | EPI_ISL_1288314 | 11/02/2021 | Baja California Sur | Human | Female | 23 | Ambulatory   | Original | Nasopharyngeal and oropharyngeal swab |
| hCoV-19/Mexico/BCS-IBT-IMSS-106/2021    | EPI_ISL_1288316 | 11/02/2021 | Baja California Sur | Human | Male   | 60 | Ambulatory   | Original | Nasopharyngeal and oropharyngeal swab |
| hCoV-19/Mexico/BCS-IBT-IMSS-108/2021    | EPI_ISL_1288317 | 11/02/2021 | Baja California Sur | Human | Female | 46 | Ambulatory   | Original | Nasopharyngeal and oropharyngeal swab |
| hCoV-19/Mexico/BCS-IBT-IMSS-109/2021    | EPI_ISL_1288318 | 11/02/2021 | Baja California Sur | Human | Male   | 35 | Ambulatory   | Original | Nasopharyngeal and oropharyngeal swab |
| hCoV-19/Mexico/CHP-IBT-IMSS-119/2021    | EPI_ISL_1288327 | 11/02/2021 | Chiapas             | Human | Female | 57 | Ambulatory   | Original | Nasopharyngeal and oropharyngeal swab |
| hCoV-19/Mexico/CHP-IBT-IMSS-122/2021    | EPI_ISL_1288329 | 11/02/2021 | Chiapas             | Human | Male   | 23 | Ambulatory   | Original | Nasopharyngeal and oropharyngeal swab |
| hCoV-19/Mexico/PUE-IBT-IMSS-124/2021    | EPI_ISL_1288331 | 11/02/2021 | Puebla              | Human | Male   | 54 | Ambulatory   | Original | Nasopharyngeal swab                   |
| hCoV-19/Mexico/PUE-IBT-IMSS-127/2021    | EPI_ISL_1288333 | 11/02/2021 | Puebla              | Human | Male   | 39 | Ambulatory   | Original | Nasopharyngeal swab                   |
| hCoV-19/Mexico/PUE-IBT-IMSS-128/2021    | EPI_ISL_1288334 | 11/02/2021 | Puebla              | Human | Female | 19 | Ambulatory   | Original | Nasopharyngeal and oropharyngeal swab |
| hCoV-19/Mexico/PUE-IBT-IMSS-131/2021    | EPI_ISL_1288337 | 11/02/2021 | Puebla              | Human | Female | 30 | Ambulatory   | Original | Nasopharyngeal and oropharyngeal swab |
| hCoV-19/Mexico/PUE-IBT-IMSS-132/2021    | EPI_ISL_1288338 | 11/02/2021 | Puebla              | Human | Female | 67 | Ambulatory   | Original | Nasopharyngeal swab                   |
| hCoV-19/Mexico/PUE-IBT-IMSS-133/2021    | EPI_ISL_1288339 | 11/02/2021 | Puebla              | Human | Female | 51 | Ambulatory   | Original | Nasopharyngeal and oropharyngeal swab |
| hCoV-19/Mexico/PUE-IBT-IMSS-134/2021    | EPI_ISL_1288340 | 11/02/2021 | Puebla              | Human | Female | 57 | Ambulatory   | Original | Nasopharyngeal swab                   |
| hCoV-19/Mexico/PUE-IBT-IMSS-142/2021    | EPI_ISL_1288345 | 11/02/2021 | Puebla              | Human | Female | 52 | Ambulatory   | Original | Nasopharyngeal and oropharyngeal swab |
| hCoV-19/Mexico/PUE-IBT-IMSS-145/2021    | EPI_ISL_1288348 | 11/02/2021 | Puebla              | Human | Male   | 30 | Ambulatory   | Original | Nasopharyngeal and oropharyngeal swab |
| hCoV-19/Mexico/PUE-IBT-IMSS-146/2021    | EPI_ISL_1288349 | 11/02/2021 | Puebla              | Human | Female | 26 | Ambulatory   | Original | Nasopharyngeal and oropharyngeal swab |
| hCoV-19/Mexico/VER-IBT-IMSS-151/2021    | EPI_ISL_1288353 | 11/02/2021 | Veracruz            | Human | Female | 31 | Ambulatory   | Original | Nasopharyngeal and oropharyngeal swab |
| hCoV-19/Mexico/OAX-IBT-IMSS-152/2021    | EPI_ISL_1288354 | 11/02/2021 | Oaxaca              | Human | Male   | 32 | Ambulatory   | Original | Nasopharyngeal and oropharyngeal swab |
| hCoV-19/Mexico/VER-IBT-IMSS-153/2021    | EPI_ISL_1288355 | 11/02/2021 | Veracruz            | Human | Female | 43 | Ambulatory   | Original | Nasopharyngeal and oropharyngeal swab |
| hCoV-19/Mexico/GRO-IBT-IMSS-154/2021    | EPI_ISL_1288356 | 11/02/2021 | Guerrero            | Human | Female | 60 | Hospitalized | Original | Nasopharyngeal and oropharyngeal swab |
| hCoV-19/Mexico/VER-IBT-IMSS-158/2021    | EPI_ISL_1288360 | 11/02/2021 | Veracruz            | Human | Male   | 31 | Ambulatory   | Original | Nasopharyngeal and oropharyngeal swab |
| hCoV-19/Mexico/VER-IBT-IMSS-160/2021    | EPI_ISL_1288361 | 11/02/2021 | Veracruz            | Human | Female | 48 | Ambulatory   | Original | Nasopharyngeal and oropharyngeal swab |
| hCoV-19/Mexico/GRO-IBT-IMSS-161/2021    | EPI_ISL_1288362 | 11/02/2021 | Guerrero            | Human | Female | 25 | Ambulatory   | Original | Nasopharyngeal and oropharyngeal swab |
| hCoV-19/Mexico/VER-IBT-IMSS-162/2021    | EPI_ISL_1288363 | 11/02/2021 | Veracruz            | Human | Male   | 34 | Ambulatory   | Original | Nasopharyngeal and oropharyngeal swab |
| hCoV-19/Mexico/VER-IBT-IMSS-163/2021    | EPI_ISL_1288364 | 11/02/2021 | Veracruz            | Human | Female | 39 | Ambulatory   | Original | Nasopharyngeal and oropharyngeal swab |



|                                         |                 |            |                     |       |        |    |              |          |                                       |
|-----------------------------------------|-----------------|------------|---------------------|-------|--------|----|--------------|----------|---------------------------------------|
| hCoV-19/Mexico/MEX-IBT-IMSS-164/2021    | EPI_ISL_1288365 | 11/02/2021 | State of Mexico     | Human | Male   | 81 | Hospitalized | Original | Nasopharyngeal and oropharyngeal swab |
| hCoV-19/Mexico/MEX-IBT-IMSS-165/2021    | EPI_ISL_1288366 | 11/02/2021 | State of Mexico     | Human | Male   | 43 | Hospitalized | Original | Nasopharyngeal and oropharyngeal swab |
| hCoV-19/Mexico/MEX-IBT-IMSS-166/2021    | EPI_ISL_1288367 | 11/02/2021 | State of Mexico     | Human | Male   | 55 | Hospitalized | Original | Nasopharyngeal and oropharyngeal swab |
| hCoV-19/Mexico/MEX-IBT-IMSS-167/2021    | EPI_ISL_1288368 | 11/02/2021 | State of Mexico     | Human | Male   | 61 | Hospitalized | Original | Nasopharyngeal and oropharyngeal swab |
| hCoV-19/Mexico/MOR-IBT-IMSS-172/2021    | EPI_ISL_1288371 | 11/02/2021 | Morelos             | Human | Male   | 62 | Hospitalized | Original | Nasopharyngeal and oropharyngeal swab |
| hCoV-19/Mexico/MOR-IBT-IMSS-174/2021    | EPI_ISL_1288373 | 11/02/2021 | Morelos             | Human | Male   | 69 | Hospitalized | Original | Nasopharyngeal and oropharyngeal swab |
| hCoV-19/Mexico/MOR-IBT-IMSS-175/2021    | EPI_ISL_1288374 | 11/02/2021 | Morelos             | Human | Male   | 63 | Hospitalized | Original | Nasopharyngeal and oropharyngeal swab |
| hCoV-19/Mexico/MOR-IBT-IMSS-176/2021    | EPI_ISL_1288375 | 11/02/2021 | Morelos             | Human | Female | 73 | Ambulatory   | Original | Nasopharyngeal and oropharyngeal swab |
| hCoV-19/Mexico/MEX-IBT-IMSS-184/2021    | EPI_ISL_1288382 | 11/02/2021 | State of Mexico     | Human | Female | 12 | Ambulatory   | Original | Nasopharyngeal and oropharyngeal swab |
| hCoV-19/Mexico/MEX-IBT-IMSS-185/2021    | EPI_ISL_1288383 | 11/02/2021 | State of Mexico     | Human | Female | 49 | Ambulatory   | Original | Nasopharyngeal and oropharyngeal swab |
| hCoV-19/Mexico/MEX-IBT-IMSS-186/2021    | EPI_ISL_1288384 | 11/02/2021 | State of Mexico     | Human | Male   | 71 | Hospitalized | Original | Nasopharyngeal and oropharyngeal swab |
| hCoV-19/Mexico/MEX-IBT-IMSS-188/2021    | EPI_ISL_1288386 | 11/02/2021 | State of Mexico     | Human | Male   | 47 | Ambulatory   | Original | Nasopharyngeal and oropharyngeal swab |
| hCoV-19/Mexico/OAX-IBT-IMSS-189/2021    | EPI_ISL_1288387 | 11/02/2021 | Oaxaca              | Human | Male   | 51 | Ambulatory   | Original | Nasopharyngeal and oropharyngeal swab |
| hCoV-19/Mexico/OAX-IBT-IMSS-190/2021    | EPI_ISL_1288388 | 11/02/2021 | Oaxaca              | Human | Male   | 52 | Ambulatory   | Original | Nasopharyngeal and oropharyngeal swab |
| hCoV-19/Mexico/AGU-IBT-IMSS-195/2021    | EPI_ISL_1288392 | 11/02/2021 | Aguascalientes      | Human | Male   | 32 | Ambulatory   | Original | Nasopharyngeal and oropharyngeal swab |
| hCoV-19/Mexico/AGU-IBT-IMSS-196/2021    | EPI_ISL_1288393 | 11/02/2021 | Aguascalientes      | Human | Male   | 35 | Ambulatory   | Original | Nasopharyngeal and oropharyngeal swab |
| hCoV-19/Mexico/BCS-IBT-IMSS-233/2021    | EPI_ISL_1288426 | 11/02/2021 | Baja California Sur | Human | Female | 52 | Ambulatory   | Original | Nasopharyngeal and oropharyngeal swab |
| hCoV-19/Mexico/VER-IBT-IMSS-256/2021    | EPI_ISL_1288445 | 11/02/2021 | Veracruz            | Human | Male   | 20 | Ambulatory   | Original | Nasopharyngeal and oropharyngeal swab |
| hCoV-19/Mexico/VER-IBT-IMSS-257/2021    | EPI_ISL_1288446 | 11/02/2021 | Veracruz            | Human | Female | 58 | Ambulatory   | Original | Nasopharyngeal and oropharyngeal swab |
| hCoV-19/Mexico/VER-IBT-IMSS-258/2021    | EPI_ISL_1288447 | 11/02/2021 | Veracruz            | Human | Male   | 14 | Ambulatory   | Original | Nasopharyngeal and oropharyngeal swab |
| hCoV-19/Mexico/VER-IBT-IMSS-259/2021    | EPI_ISL_1288448 | 11/02/2021 | Veracruz            | Human | Male   | 41 | Ambulatory   | Original | Nasopharyngeal and oropharyngeal swab |
| hCoV-19/Mexico/VER-IBT-IMSS-261/2021    | EPI_ISL_1288449 | 11/02/2021 | Veracruz            | Human | Male   | 24 | Ambulatory   | Original | Nasopharyngeal and oropharyngeal swab |
| hCoV-19/Mexico/VER-IBT-IMSS-262/2021    | EPI_ISL_1288450 | 11/02/2021 | Veracruz            | Human | Male   | 41 | Ambulatory   | Original | Nasopharyngeal and oropharyngeal swab |
| hCoV-19/Mexico/VER-IBT-IMSS-263/2021    | EPI_ISL_1288451 | 11/02/2021 | Veracruz            | Human | Female | 21 | Ambulatory   | Original | Nasopharyngeal and oropharyngeal swab |
| hCoV-19/Mexico/VER-IBT-IMSS-264/2021    | EPI_ISL_1288452 | 11/02/2021 | Veracruz            | Human | Male   | 20 | Ambulatory   | Original | Nasopharyngeal and oropharyngeal swab |
| hCoV-19/Mexico/VER-IBT-IMSS-266/2021    | EPI_ISL_1288454 | 11/02/2021 | Veracruz            | Human | Male   | 33 | Ambulatory   | Original | Nasopharyngeal and oropharyngeal swab |
| hCoV-19/Mexico/VER-IBT-IMSS-267/2021    | EPI_ISL_1288455 | 11/02/2021 | Veracruz            | Human | Female | 34 | Ambulatory   | Original | Nasopharyngeal and oropharyngeal swab |
| hCoV-19/Mexico/VER-IBT-IMSS-268/2021    | EPI_ISL_1288456 | 11/02/2021 | Veracruz            | Human | Female | 21 | Ambulatory   | Original | Nasopharyngeal and oropharyngeal swab |
| hCoV-19/Mexico/VER-IBT-IMSS-269/2021    | EPI_ISL_1288457 | 11/02/2021 | Veracruz            | Human | Male   | 37 | Ambulatory   | Original | Nasopharyngeal and oropharyngeal swab |
| hCoV-19/Mexico/VER-IBT-IMSS-270/2021    | EPI_ISL_1288458 | 11/02/2021 | Veracruz            | Human | Male   | 31 | Ambulatory   | Original | Nasopharyngeal and oropharyngeal swab |
| hCoV-19/Mexico/VER-IBT-IMSS-272/2021    | EPI_ISL_1288459 | 11/02/2021 | Veracruz            | Human | Female | 35 | Ambulatory   | Original | Nasopharyngeal and oropharyngeal swab |
| hCoV-19/Mexico/VER-IBT-IMSS-273/2021    | EPI_ISL_1288460 | 11/02/2021 | Veracruz            | Human | Male   | 39 | Ambulatory   | Original | Nasopharyngeal and oropharyngeal swab |
| hCoV-19/Mexico/VER-IBT-IMSS-274/2021    | EPI_ISL_1288461 | 11/02/2021 | Veracruz            | Human | Male   | 27 | Ambulatory   | Original | Nasopharyngeal and oropharyngeal swab |
| hCoV-19/Mexico/VER-IBT-IMSS-278/2021    | EPI_ISL_1288465 | 11/02/2021 | Veracruz            | Human | Female | 41 | Ambulatory   | Original | Nasopharyngeal and oropharyngeal swab |
| hCoV-19/Mexico/VER-IBT-IMSS-279/2021    | EPI_ISL_1288466 | 11/02/2021 | Veracruz            | Human | Female | 40 | Ambulatory   | Original | Nasopharyngeal and oropharyngeal swab |
| hCoV-19/Mexico/VER-IBT-IMSS-280/2021    | EPI_ISL_1288467 | 11/02/2021 | Veracruz            | Human | Female | 72 | Ambulatory   | Original | Nasopharyngeal and oropharyngeal swab |
| hCoV-19/Mexico/VER-IBT-IMSS-281/2021    | EPI_ISL_1288468 | 11/02/2021 | Veracruz            | Human | Female | 20 | Ambulatory   | Original | Nasopharyngeal and oropharyngeal swab |
| hCoV-19/Mexico/VER-IBT-IMSS-283/2021    | EPI_ISL_1288469 | 11/02/2021 | Veracruz            | Human | Male   | 30 | Ambulatory   | Original | Nasopharyngeal and oropharyngeal swab |
| hCoV-19/Mexico/BCS-IBT-IMSS-310/2021    | EPI_ISL_1288493 | 11/02/2021 | Baja California Sur | Human | Female | 21 | Ambulatory   | Original | Nasopharyngeal and oropharyngeal swab |
| hCoV-19/Mexico/ZAC-INER-IMSS-00020/2021 | EPI_ISL_1279322 | 11/02/2021 | Zacatecas           | Human | Male   | 66 | Hospitalized | Original | Nasopharyngeal and oropharyngeal swab |
| hCoV-19/Mexico/ZAC-INER-IMSS-00024/2021 | EPI_ISL_1279325 | 11/02/2021 | Zacatecas           | Human | Male   | 44 | Ambulatory   | Original | Nasopharyngeal and oropharyngeal swab |

|                                         |                 |            |                 |       |        |    |              |          |                                       |
|-----------------------------------------|-----------------|------------|-----------------|-------|--------|----|--------------|----------|---------------------------------------|
| hCoV-19/Mexico/ZAC-INER-IMSS-00027/2021 | EPI_ISL_1279326 | 11/02/2021 | Zacatecas       | Human | Male   | 21 | Ambulatory   | Original | Nasopharyngeal and oropharyngeal swab |
| hCoV-19/Mexico/ZAC-INER-IMSS-00028/2021 | EPI_ISL_1279327 | 11/02/2021 | Zacatecas       | Human | Male   | 35 | Ambulatory   | Original | Nasopharyngeal and oropharyngeal swab |
| hCoV-19/Mexico/ZAC-INER-IMSS-00029/2021 | EPI_ISL_1279328 | 11/02/2021 | Zacatecas       | Human | Female | 18 | Ambulatory   | Original | Nasopharyngeal and oropharyngeal swab |
| hCoV-19/Mexico/ZAC-INER-IMSS-00033/2021 | EPI_ISL_1279332 | 11/02/2021 | Zacatecas       | Human | Female | 25 | Ambulatory   | Original | Nasopharyngeal and oropharyngeal swab |
| hCoV-19/Mexico/CMX-IBT-IMSS-372/2021    | EPI_ISL_1288200 | 11/02/2021 | Mexico City     | Human | Male   | 69 | Hospitalized | Original | Oropharyngeal swab                    |
| hCoV-19/Mexico/MEX-IBT-IMSS-377/2021    | EPI_ISL_1288205 | 11/02/2021 | State of Mexico | Human | Male   | 41 | Ambulatory   | Original | Nasopharyngeal and oropharyngeal swab |
| hCoV-19/Mexico/MEX-IBT-IMSS-378/2021    | EPI_ISL_1288206 | 11/02/2021 | State of Mexico | Human | Female | 40 | Ambulatory   | Original | Nasopharyngeal and oropharyngeal swab |
| hCoV-19/Mexico/MEX-IBT-IMSS-382/2021    | EPI_ISL_1288209 | 11/02/2021 | State of Mexico | Human | Female | 68 | Ambulatory   | Original | Nasopharyngeal and oropharyngeal swab |
| hCoV-19/Mexico/CMX-IBT-IMSS-384/2021    | EPI_ISL_1288211 | 11/02/2021 | Mexico City     | Human | Male   | 44 | Ambulatory   | Original | Nasopharyngeal and oropharyngeal swab |
| hCoV-19/Mexico/GRO-IBT-IMSS-393/2021    | EPI_ISL_1288219 | 11/02/2021 | Guerrero        | Human | Male   | 50 | Hospitalized | Original | Nasopharyngeal and oropharyngeal swab |
| hCoV-19/Mexico/OAX-IBT-IMSS-399/2021    | EPI_ISL_1288224 | 11/02/2021 | Oaxaca          | Human | Female | 43 | Ambulatory   | Original | Nasopharyngeal and oropharyngeal swab |
| hCoV-19/Mexico/MEX-IBT-IMSS-30/2021     | EPI_ISL_1288249 | 11/02/2021 | State of Mexico | Human | Male   | 31 | Ambulatory   | Original | Nasopharyngeal and oropharyngeal swab |
| hCoV-19/Mexico/TLA-IBT-IMSS-31/2021     | EPI_ISL_1288250 | 11/02/2021 | Tlaxcala        | Human | Male   | 47 | Hospitalized | Original | Nasopharyngeal and oropharyngeal swab |
| hCoV-19/Mexico/TLA-IBT-IMSS-32/2021     | EPI_ISL_1288251 | 11/02/2021 | Tlaxcala        | Human | Male   | 69 | Hospitalized | Original | Nasopharyngeal and oropharyngeal swab |
| hCoV-19/Mexico/TLA-IBT-IMSS-33/2021     | EPI_ISL_1288252 | 11/02/2021 | Tlaxcala        | Human | Male   | 48 | Hospitalized | Original | Nasopharyngeal and oropharyngeal swab |
| hCoV-19/Mexico/PUE-IBT-IMSS-35/2021     | EPI_ISL_1288254 | 11/02/2021 | Puebla          | Human | Male   | 58 | Ambulatory   | Original | Nasopharyngeal and oropharyngeal swab |
| hCoV-19/Mexico/PUE-IBT-IMSS-38/2021     | EPI_ISL_1288256 | 11/02/2021 | Puebla          | Human | Female | 54 | Ambulatory   | Original | Nasopharyngeal and oropharyngeal swab |
| hCoV-19/Mexico/PUE-IBT-IMSS-39/2021     | EPI_ISL_1288257 | 11/02/2021 | Puebla          | Human | Male   | 45 | Ambulatory   | Original | Nasopharyngeal and oropharyngeal swab |
| hCoV-19/Mexico/PUE-IBT-IMSS-40/2021     | EPI_ISL_1288258 | 11/02/2021 | Puebla          | Human | Male   | 44 | Ambulatory   | Original | Nasopharyngeal and oropharyngeal swab |
| hCoV-19/Mexico/PUE-IBT-IMSS-41/2021     | EPI_ISL_1288259 | 11/02/2021 | Puebla          | Human | Male   | 50 | Ambulatory   | Original | Nasopharyngeal swab                   |
| hCoV-19/Mexico/PUE-IBT-IMSS-42/2021     | EPI_ISL_1288260 | 11/02/2021 | Puebla          | Human | Male   | 58 | Ambulatory   | Original | Nasopharyngeal swab                   |
| hCoV-19/Mexico/PUE-IBT-IMSS-43/2021     | EPI_ISL_1288261 | 11/02/2021 | Puebla          | Human | Female | 41 | Ambulatory   | Original | Nasopharyngeal swab                   |
| hCoV-19/Mexico/PUE-IBT-IMSS-44/2021     | EPI_ISL_1288262 | 11/02/2021 | Puebla          | Human | Male   | 57 | Ambulatory   | Original | Oropharyngeal swab                    |
| hCoV-19/Mexico/PUE-IBT-IMSS-45/2021     | EPI_ISL_1288263 | 11/02/2021 | Puebla          | Human | Female | 31 | Ambulatory   | Original | Nasopharyngeal swab                   |
| hCoV-19/Mexico/PUE-IBT-IMSS-46/2021     | EPI_ISL_1288264 | 11/02/2021 | Puebla          | Human | Female | 28 | Ambulatory   | Original | Nasopharyngeal swab                   |
| hCoV-19/Mexico/PUE-IBT-IMSS-50/2021     | EPI_ISL_1288267 | 11/02/2021 | Puebla          | Human | Female | 88 | Ambulatory   | Original | Nasopharyngeal swab                   |
| hCoV-19/Mexico/PUE-IBT-IMSS-52/2021     | EPI_ISL_1288269 | 11/02/2021 | Puebla          | Human | Female | 53 | Ambulatory   | Original | Oropharyngeal swab                    |
| hCoV-19/Mexico/PUE-IBT-IMSS-53/2021     | EPI_ISL_1288270 | 11/02/2021 | Puebla          | Human | Female | 26 | Ambulatory   | Original | Oropharyngeal swab                    |
| hCoV-19/Mexico/PUE-IBT-IMSS-54/2021     | EPI_ISL_1288271 | 11/02/2021 | Puebla          | Human | Female | 46 | Ambulatory   | Original | Oropharyngeal swab                    |
| hCoV-19/Mexico/PUE-IBT-IMSS-55/2021     | EPI_ISL_1288272 | 11/02/2021 | Puebla          | Human | Female | 34 | Ambulatory   | Original | Nasopharyngeal and oropharyngeal swab |
| hCoV-19/Mexico/PUE-IBT-IMSS-57/2021     | EPI_ISL_1288274 | 11/02/2021 | Puebla          | Human | Female | 33 | Ambulatory   | Original | Nasopharyngeal and oropharyngeal swab |
| hCoV-19/Mexico/SLP-IBT-IMSS-65/2021     | EPI_ISL_1288281 | 11/02/2021 | San Luis Potosi | Human | Female | 24 | Ambulatory   | Original | Nasopharyngeal and oropharyngeal swab |
| hCoV-19/Mexico/SLP-IBT-IMSS-66/2021     | EPI_ISL_1288282 | 11/02/2021 | San Luis Potosi | Human | Female | 22 | Ambulatory   | Original | Nasopharyngeal and oropharyngeal swab |
| hCoV-19/Mexico/SLP-IBT-IMSS-67/2021     | EPI_ISL_1288283 | 11/02/2021 | San Luis Potosi | Human | Female | 36 | Ambulatory   | Original | Nasopharyngeal and oropharyngeal swab |
| hCoV-19/Mexico/SLP-IBT-IMSS-68/2021     | EPI_ISL_1288284 | 11/02/2021 | San Luis Potosi | Human | Female | 46 | Ambulatory   | Original | Nasopharyngeal and oropharyngeal swab |
| hCoV-19/Mexico/ZAC_INER_IMSS_00676/2021 | EPI_ISL_2091132 | 11/02/2021 | Zacatecas       | Human | Male   | 32 | Ambulatory   | Original | Nasopharyngeal and oropharyngeal swab |
| hCoV-19/Mexico/DUR_INER_IMSS_00680/2021 | EPI_ISL_2091136 | 11/02/2021 | Durango         | Human | Male   | 29 | Ambulatory   | Original | Nasopharyngeal and oropharyngeal swab |
| hCoV-19/Mexico/CAM-INER-IMSS-00369/2021 | EPI_ISL_1279294 | 12/02/2021 | Campeche        | Human | Female | 41 | Ambulatory   | Original | Nasopharyngeal and oropharyngeal swab |
| hCoV-19/Mexico/ZAC-INER-IMSS-00081/2021 | EPI_ISL_1287766 | 12/02/2021 | Zacatecas       | Human | Male   | 88 | Hospitalized | Original | Nasopharyngeal and oropharyngeal swab |
| hCoV-19/Mexico/CMX-IBT-IMSS-364/2021    | EPI_ISL_1288193 | 12/02/2021 | Mexico City     | Human | Female | 65 | Ambulatory   | Original | Nasopharyngeal and oropharyngeal swab |
| hCoV-19/Mexico/CMX-IBT-IMSS-365/2021    | EPI_ISL_1288194 | 12/02/2021 | Mexico City     | Human | Female | 64 | Ambulatory   | Original | Nasopharyngeal and oropharyngeal swab |

|                                          |                 |            |                     |       |        |    |              |          |                                       |
|------------------------------------------|-----------------|------------|---------------------|-------|--------|----|--------------|----------|---------------------------------------|
| hCoV-19/Mexico/CMX-IBT-IMSS-366/2021     | EPI_ISL_1288195 | 12/02/2021 | Mexico City         | Human | Male   | 75 | Ambulatory   | Original | Nasopharyngeal and oropharyngeal swab |
| hCoV-19/Mexico/YUC-INNER-IMSS-00360/2021 | EPI_ISL_1279605 | 12/02/2021 | Yucatan             | Human | Male   | 21 | Ambulatory   | Original | Nasopharyngeal swab                   |
| hCoV-19/Mexico/YUC-INNER-IMSS-00361/2021 | EPI_ISL_1279606 | 12/02/2021 | Yucatan             | Human | Male   | 31 | Ambulatory   | Original | Nasopharyngeal swab                   |
| hCoV-19/Mexico/YUC-INNER-IMSS-00362/2021 | EPI_ISL_1279607 | 12/02/2021 | Yucatan             | Human | Female | 50 | Ambulatory   | Original | Nasopharyngeal and oropharyngeal swab |
| hCoV-19/Mexico/YUC-INNER-IMSS-00363/2021 | EPI_ISL_1279608 | 12/02/2021 | Yucatan             | Human | Female | 33 | Ambulatory   | Original | Nasopharyngeal and oropharyngeal swab |
| hCoV-19/Mexico/CAM-INNER-IMSS-00371/2021 | EPI_ISL_1279614 | 12/02/2021 | Campeche            | Human | Male   | 34 | Ambulatory   | Original | Nasopharyngeal and oropharyngeal swab |
| hCoV-19/Mexico/AGU-IBT-IMSS-223/2021     | EPI_ISL_1288417 | 12/02/2021 | Mexico City         | Human | Female | 79 | Hospitalized | Original | Nasopharyngeal swab                   |
| hCoV-19/Mexico/CMX-IBT-IMSS-224/2021     | EPI_ISL_1288418 | 12/02/2021 | Mexico City         | Human | Female | 81 | Hospitalized | Original | Nasopharyngeal swab                   |
| hCoV-19/Mexico/CMX-IBT-IMSS-227/2021     | EPI_ISL_1288420 | 12/02/2021 | Mexico City         | Human | Male   | 40 | Hospitalized | Original | Oropharyngeal swab                    |
| hCoV-19/Mexico/BCS-IBT-IMSS-246/2021     | EPI_ISL_1288435 | 12/02/2021 | Baja California Sur | Human | Female | 28 | Ambulatory   | Original | Nasopharyngeal and oropharyngeal swab |
| hCoV-19/Mexico/BCS-IBT-IMSS-247/2021     | EPI_ISL_1288436 | 12/02/2021 | Baja California Sur | Human | Male   | 24 | Ambulatory   | Original | Nasopharyngeal and oropharyngeal swab |
| hCoV-19/Mexico/BCS-IBT-IMSS-248/2021     | EPI_ISL_1288437 | 12/02/2021 | Baja California Sur | Human | Male   | 36 | Ambulatory   | Original | Nasopharyngeal and oropharyngeal swab |
| hCoV-19/Mexico/BCS-IBT-IMSS-250/2021     | EPI_ISL_1288438 | 12/02/2021 | Baja California Sur | Human | Male   | 40 | Ambulatory   | Original | Nasopharyngeal and oropharyngeal swab |
| hCoV-19/Mexico/BCS-IBT-IMSS-251/2021     | EPI_ISL_1288439 | 12/02/2021 | Baja California Sur | Human | Female | 39 | Ambulatory   | Original | Nasopharyngeal and oropharyngeal swab |
| hCoV-19/Mexico/MEX-IBT-IMSS-337/2021     | EPI_ISL_1288516 | 12/02/2021 | State of Mexico     | Human | Male   | 72 | Hospitalized | Original | Oropharyngeal swab                    |
| hCoV-19/Mexico/MEX-IBT-IMSS-339/2021     | EPI_ISL_1288518 | 12/02/2021 | State of Mexico     | Human | Female | 26 | Hospitalized | Original | Nasopharyngeal and oropharyngeal swab |
| hCoV-19/Mexico/CMX-IBT-IMSS-340/2021     | EPI_ISL_1288519 | 12/02/2021 | Mexico City         | Human | Male   | 9  | Ambulatory   | Original | Nasopharyngeal and oropharyngeal swab |
| hCoV-19/Mexico/CMX-IBT-IMSS-345/2021     | EPI_ISL_1288524 | 12/02/2021 | Mexico City         | Human | Male   | 57 | Ambulatory   | Original | Nasopharyngeal and oropharyngeal swab |
| hCoV-19/Mexico/CMX-IBT-IMSS-346/2021     | EPI_ISL_1288525 | 12/02/2021 | Mexico City         | Human | Female | 65 | Ambulatory   | Original | Nasopharyngeal and oropharyngeal swab |
| hCoV-19/Mexico/CMX-IBT-IMSS-349/2021     | EPI_ISL_1288526 | 12/02/2021 | Mexico City         | Human | Female | 47 | Ambulatory   | Original | Nasopharyngeal and oropharyngeal swab |
| hCoV-19/Mexico/CMX-IBT-IMSS-350/2021     | EPI_ISL_1288527 | 12/02/2021 | Mexico City         | Human | Male   | 58 | Ambulatory   | Original | Nasopharyngeal and oropharyngeal swab |
| hCoV-19/Mexico/CMX-IBT-IMSS-351/2021     | EPI_ISL_1288528 | 12/02/2021 | Mexico City         | Human | Female | 36 | Ambulatory   | Original | Nasopharyngeal and oropharyngeal swab |
| hCoV-19/Mexico/VER-IBT-IMSS-352/2021     | EPI_ISL_1288529 | 12/02/2021 | Veracruz            | Human | Female | 38 | Ambulatory   | Original | Nasopharyngeal swab                   |
| hCoV-19/Mexico/VER-IBT-IMSS-353/2021     | EPI_ISL_1288530 | 12/02/2021 | Veracruz            | Human | Female | 34 | Ambulatory   | Original | Nasopharyngeal swab                   |
| hCoV-19/Mexico/VER-IBT-IMSS-354/2021     | EPI_ISL_1288531 | 12/02/2021 | Veracruz            | Human | Male   | 49 | Ambulatory   | Original | Nasopharyngeal and oropharyngeal swab |
| hCoV-19/Mexico/NLE-INNER-IMSS-00206/2021 | EPI_ISL_1279474 | 12/02/2021 | Nuevo Leon          | Human | Male   | 47 | Hospitalized | Original | Nasopharyngeal and oropharyngeal swab |
| hCoV-19/Mexico/COA-INNER-IMSS-00216/2021 | EPI_ISL_1279482 | 12/02/2021 | Coahuila            | Human | Male   | 73 | Hospitalized | Original | Nasopharyngeal and oropharyngeal swab |
| hCoV-19/Mexico/COA-INNER-IMSS-00217/2021 | EPI_ISL_1279483 | 12/02/2021 | Coahuila            | Human | Male   | 50 | Hospitalized | Original | Nasopharyngeal and oropharyngeal swab |
| hCoV-19/Mexico/TAM-INNER-IMSS-00227/2021 | EPI_ISL_1279492 | 12/02/2021 | Tamaulipas          | Human | Female | 53 | Ambulatory   | Original | Pharyngeal swab                       |
| hCoV-19/Mexico/COA-INNER-IMSS-00247/2021 | EPI_ISL_1279510 | 12/02/2021 | Coahuila            | Human | Female | 46 | Ambulatory   | Original | Nasopharyngeal and oropharyngeal swab |
| hCoV-19/Mexico/TAM-INNER-IMSS-00277/2021 | EPI_ISL_1279535 | 12/02/2021 | Tamaulipas          | Human | Female | 28 | Ambulatory   | Original | Nasopharyngeal and oropharyngeal swab |
| hCoV-19/Mexico/CMX-IBT-IMSS-147/2021     | EPI_ISL_1288350 | 12/02/2021 | Mexico City         | Human | Female | 46 | Ambulatory   | Original | Nasopharyngeal and oropharyngeal swab |
| hCoV-19/Mexico/VER-IBT-IMSS-150/2021     | EPI_ISL_1288352 | 12/02/2021 | Veracruz            | Human | Female | 35 | Ambulatory   | Original | Nasopharyngeal and oropharyngeal swab |
| hCoV-19/Mexico/VER-IBT-IMSS-156/2021     | EPI_ISL_1288358 | 12/02/2021 | Veracruz            | Human | Male   | 53 | Hospitalized | Original | Nasopharyngeal and oropharyngeal swab |
| hCoV-19/Mexico/VER-IBT-IMSS-157/2021     | EPI_ISL_1288359 | 12/02/2021 | Veracruz            | Human | Female | 65 | Hospitalized | Original | Nasopharyngeal and oropharyngeal swab |
| hCoV-19/Mexico/MEX-IBT-IMSS-169/2021     | EPI_ISL_1288370 | 12/02/2021 | State of Mexico     | Human | Male   | 65 | Hospitalized | Original | Nasopharyngeal and oropharyngeal swab |
| hCoV-19/Mexico/MOR-IBT-IMSS-173/2021     | EPI_ISL_1288372 | 12/02/2021 | Morelos             | Human | Male   | 57 | Hospitalized | Original | Nasopharyngeal and oropharyngeal swab |
| hCoV-19/Mexico/MEX-IBT-IMSS-187/2021     | EPI_ISL_1288385 | 12/02/2021 | State of Mexico     | Human | Male   | 65 | Hospitalized | Original | Nasopharyngeal and oropharyngeal swab |
| hCoV-19/Mexico/OAX-IBT-IMSS-191/2021     | EPI_ISL_1288389 | 12/02/2021 | Oaxaca              | Human | Male   | 23 | Ambulatory   | Original | Nasopharyngeal and oropharyngeal swab |
| hCoV-19/Mexico/OAX-IBT-IMSS-192/2021     | EPI_ISL_1288390 | 12/02/2021 | Oaxaca              | Human | Female | 31 | Ambulatory   | Original | Nasopharyngeal and oropharyngeal swab |
| hCoV-19/Mexico/OAX-IBT-IMSS-194/2021     | EPI_ISL_1288391 | 12/02/2021 | Oaxaca              | Human | Female | 23 | Ambulatory   | Original | Nasopharyngeal and oropharyngeal swab |



|                                         |                 |            |                     |       |        |    |              |          |                                       |
|-----------------------------------------|-----------------|------------|---------------------|-------|--------|----|--------------|----------|---------------------------------------|
| hCoV-19/Mexico/MEX-IBT-IMSS-197/2021    | EPI_ISL_1288394 | 12/02/2021 | State of Mexico     | Human | Female | 68 | Hospitalized | Original | Nasopharyngeal and oropharyngeal swab |
| hCoV-19/Mexico/MEX-IBT-IMSS-198/2021    | EPI_ISL_1288395 | 12/02/2021 | State of Mexico     | Human | Male   | 55 | Hospitalized | Original | Nasopharyngeal and oropharyngeal swab |
| hCoV-19/Mexico/MEX-IBT-IMSS-199/2021    | EPI_ISL_1288396 | 12/02/2021 | State of Mexico     | Human | Female | 71 | Hospitalized | Original | Nasopharyngeal and oropharyngeal swab |
| hCoV-19/Mexico/MEX-IBT-IMSS-200/2021    | EPI_ISL_1288397 | 12/02/2021 | State of Mexico     | Human | Female | 58 | Hospitalized | Original | Nasopharyngeal and oropharyngeal swab |
| hCoV-19/Mexico/MEX-IBT-IMSS-201/2021    | EPI_ISL_1288398 | 12/02/2021 | State of Mexico     | Human | Male   | 69 | Hospitalized | Original | Nasopharyngeal and oropharyngeal swab |
| hCoV-19/Mexico/MEX-IBT-IMSS-202/2021    | EPI_ISL_1288399 | 12/02/2021 | State of Mexico     | Human | Female | 52 | Hospitalized | Original | Nasopharyngeal and oropharyngeal swab |
| hCoV-19/Mexico/BCS-IBT-IMSS-252/2021    | EPI_ISL_1288440 | 12/02/2021 | Baja California Sur | Human | Female | 36 | Ambulatory   | Original | Nasopharyngeal and oropharyngeal swab |
| hCoV-19/Mexico/TLA-IBT-IMSS-253/2021    | EPI_ISL_1288441 | 12/02/2021 | Tlaxcala            | Human | Male   | 64 | Hospitalized | Original | Nasopharyngeal and oropharyngeal swab |
| hCoV-19/Mexico/VER-IBT-IMSS-275/2021    | EPI_ISL_1288462 | 12/02/2021 | Veracruz            | Human | Female | 61 | Ambulatory   | Original | Nasopharyngeal and oropharyngeal swab |
| hCoV-19/Mexico/VER-IBT-IMSS-276/2021    | EPI_ISL_1288463 | 12/02/2021 | Veracruz            | Human | Female | 26 | Ambulatory   | Original | Nasopharyngeal and oropharyngeal swab |
| hCoV-19/Mexico/VER-IBT-IMSS-277/2021    | EPI_ISL_1288464 | 12/02/2021 | Veracruz            | Human | Female | 58 | Ambulatory   | Original | Nasopharyngeal and oropharyngeal swab |
| hCoV-19/Mexico/SLP-IBT-IMSS-287/2021    | EPI_ISL_1288473 | 12/02/2021 | San Luis Potosi     | Human | Female | 71 | Hospitalized | Original | Nasopharyngeal and oropharyngeal swab |
| hCoV-19/Mexico/SLP-IBT-IMSS-289/2021    | EPI_ISL_1288475 | 12/02/2021 | San Luis Potosi     | Human | Male   | 65 | Hospitalized | Original | Nasopharyngeal and oropharyngeal swab |
| hCoV-19/Mexico/CMX-IBT-IMSS-291/2021    | EPI_ISL_1288477 | 12/02/2021 | Mexico City         | Human | Female | 44 | Ambulatory   | Original | Nasopharyngeal and oropharyngeal swab |
| hCoV-19/Mexico/CMX-IBT-IMSS-293/2021    | EPI_ISL_1288478 | 12/02/2021 | Mexico City         | Human | Male   | 82 | Hospitalized | Original | Nasopharyngeal and oropharyngeal swab |
| hCoV-19/Mexico/CMX-IBT-IMSS-294/2021    | EPI_ISL_1288479 | 12/02/2021 | Mexico City         | Human | Female | 52 | Ambulatory   | Original | Nasopharyngeal and oropharyngeal swab |
| hCoV-19/Mexico/MEX-IBT-IMSS-295/2021    | EPI_ISL_1288480 | 12/02/2021 | State of Mexico     | Human | Male   | 41 | Hospitalized | Original | Nasopharyngeal and oropharyngeal swab |
| hCoV-19/Mexico/GRO-IBT-IMSS-302/2021    | EPI_ISL_1288487 | 12/02/2021 | Guerrero            | Human | Female | 26 | Ambulatory   | Original | Nasopharyngeal and oropharyngeal swab |
| hCoV-19/Mexico/OAX-IBT-IMSS-304/2021    | EPI_ISL_1288488 | 12/02/2021 | Oaxaca              | Human | Male   | 22 | Ambulatory   | Original | Nasopharyngeal and oropharyngeal swab |
| hCoV-19/Mexico/OAX-IBT-IMSS-305/2021    | EPI_ISL_1288489 | 12/02/2021 | Oaxaca              | Human | Female | 46 | Ambulatory   | Original | Nasopharyngeal and oropharyngeal swab |
| hCoV-19/Mexico/OAX-IBT-IMSS-306/2021    | EPI_ISL_1288490 | 12/02/2021 | Oaxaca              | Human | Male   | 29 | Ambulatory   | Original | Nasopharyngeal and oropharyngeal swab |
| hCoV-19/Mexico/BCS-IBT-IMSS-308/2021    | EPI_ISL_1288491 | 12/02/2021 | Baja California Sur | Human | Male   | 47 | Ambulatory   | Original | Nasopharyngeal and oropharyngeal swab |
| hCoV-19/Mexico/BCS-IBT-IMSS-309/2021    | EPI_ISL_1288492 | 12/02/2021 | Baja California Sur | Human | Female | 21 | Ambulatory   | Original | Nasopharyngeal and oropharyngeal swab |
| hCoV-19/Mexico/MEX-IBT-IMSS-311/2021    | EPI_ISL_1288494 | 12/02/2021 | State of Mexico     | Human | Male   | 51 | Ambulatory   | Original | Nasopharyngeal and oropharyngeal swab |
| hCoV-19/Mexico/OAX-IBT-IMSS-316/2021    | EPI_ISL_1288498 | 12/02/2021 | Oaxaca              | Human | Female | 35 | Ambulatory   | Original | Nasopharyngeal and oropharyngeal swab |
| hCoV-19/Mexico/ZAC-INER-IMSS-00030/2021 | EPI_ISL_1279329 | 12/02/2021 | Zacatecas           | Human | Male   | 24 | Ambulatory   | Original | Nasopharyngeal and oropharyngeal swab |
| hCoV-19/Mexico/ZAC-INER-IMSS-00031/2021 | EPI_ISL_1279330 | 12/02/2021 | Zacatecas           | Human | Female | 28 | Ambulatory   | Original | Nasopharyngeal and oropharyngeal swab |
| hCoV-19/Mexico/ZAC-INER-IMSS-00034/2021 | EPI_ISL_1279333 | 12/02/2021 | Zacatecas           | Human | Male   | 50 | Ambulatory   | Original | Nasopharyngeal and oropharyngeal swab |
| hCoV-19/Mexico/ZAC-INER-IMSS-00035/2021 | EPI_ISL_1279334 | 12/02/2021 | Zacatecas           | Human | Female | 53 | Ambulatory   | Original | Nasopharyngeal and oropharyngeal swab |
| hCoV-19/Mexico/ZAC-INER-IMSS-00036/2021 | EPI_ISL_1279335 | 12/02/2021 | Zacatecas           | Human | Female | 72 | Hospitalized | Original | Nasopharyngeal and oropharyngeal swab |
| hCoV-19/Mexico/ZAC-INER-IMSS-00039/2021 | EPI_ISL_1279338 | 12/02/2021 | Zacatecas           | Human | Male   | 41 | Ambulatory   | Original | Nasopharyngeal and oropharyngeal swab |
| hCoV-19/Mexico/CMX-IBT-IMSS-373/2021    | EPI_ISL_1288201 | 12/02/2021 | Mexico City         | Human | Male   | 58 | Hospitalized | Original | Oropharyngeal swab                    |
| hCoV-19/Mexico/CMX-IBT-IMSS-385/2021    | EPI_ISL_1288212 | 12/02/2021 | Mexico City         | Human | Male   | 68 | Hospitalized | Original | Nasopharyngeal and oropharyngeal swab |
| hCoV-19/Mexico/HID-IBT-IMSS-28/2021     | EPI_ISL_1288247 | 12/02/2021 | Hidalgo             | Human | Female | 63 | Hospitalized | Original | Oropharyngeal swab                    |
| hCoV-19/Mexico/MEX-IBT-IMSS-29/2021     | EPI_ISL_1288248 | 12/02/2021 | State of Mexico     | Human | Male   | 53 | Hospitalized | Original | Nasopharyngeal and oropharyngeal swab |
| hCoV-19/Mexico/TLA-IBT-IMSS-34/2021     | EPI_ISL_1288253 | 12/02/2021 | Tlaxcala            | Human | Male   | 32 | Ambulatory   | Original | Nasopharyngeal and oropharyngeal swab |
| hCoV-19/Mexico/SLP-IBT-IMSS-62/2021     | EPI_ISL_1288278 | 12/02/2021 | San Luis Potosi     | Human | Female | 83 | Hospitalized | Original | Nasopharyngeal and oropharyngeal swab |
| hCoV-19/Mexico/SLP-IBT-IMSS-63/2021     | EPI_ISL_1288279 | 12/02/2021 | San Luis Potosi     | Human | Female | 66 | Hospitalized | Original | Nasopharyngeal and oropharyngeal swab |
| hCoV-19/Mexico/SLP-IBT-IMSS-64/2021     | EPI_ISL_1288280 | 12/02/2021 | San Luis Potosi     | Human | Female | 50 | Ambulatory   | Original | Nasopharyngeal and oropharyngeal swab |
| hCoV-19/Mexico/SLP-IBT-IMSS-69/2021     | EPI_ISL_1288285 | 12/02/2021 | San Luis Potosi     | Human | Female | 25 | Ambulatory   | Original | Nasopharyngeal and oropharyngeal swab |
| hCoV-19/Mexico/SLP-IBT-IMSS-71/2021     | EPI_ISL_1288286 | 12/02/2021 | San Luis Potosi     | Human | Male   | 86 | Ambulatory   | Original | Nasopharyngeal and oropharyngeal swab |



|                                          |                 |            |                 |       |        |    |              |          |                                       |
|------------------------------------------|-----------------|------------|-----------------|-------|--------|----|--------------|----------|---------------------------------------|
| hCoV-19/Mexico/SLP-IBT-IMSS-76/2021      | EPI_ISL_1288291 | 12/02/2021 | San Luis Potosi | Human | Female | 54 | Ambulatory   | Original | Nasopharyngeal and oropharyngeal swab |
| hCoV-19/Mexico/SLP-IBT-IMSS-77/2021      | EPI_ISL_1288292 | 12/02/2021 | San Luis Potosi | Human | Female | 45 | Ambulatory   | Original | Nasopharyngeal and oropharyngeal swab |
| hCoV-19/Mexico/COA_INER-IMSS_00679/2021  | EPI_ISL_2091135 | 12/02/2021 | Coahuila        | Human | Male   | 48 | Hospitalized | Original | Nasopharyngeal and oropharyngeal swab |
| hCoV-19/Mexico/YUC-INER-IMSS-00364/2021  | EPI_ISL_1279609 | 13/02/2021 | Yucatan         | Human | Female | 67 | Hospitalized | Original | Nasopharyngeal and oropharyngeal swab |
| hCoV-19/Mexico/YUC-INER-IMSS-00365/2021  | EPI_ISL_1279610 | 13/02/2021 | Yucatan         | Human | Male   | 45 | Hospitalized | Original | Nasopharyngeal and oropharyngeal swab |
| hCoV-19/Mexico/MEX-IBT-IMSS-218/2021     | EPI_ISL_1288413 | 13/02/2021 | State of Mexico | Human | Male   | 12 | Ambulatory   | Original | Nasopharyngeal and oropharyngeal swab |
| hCoV-19/Mexico/CMX-IBT-IMSS-219/2021     | EPI_ISL_1288414 | 13/02/2021 | Mexico City     | Human | Male   | 61 | Hospitalized | Original | Oropharyngeal swab                    |
| hCoV-19/Mexico/CMX-IBT-IMSS-221/2021     | EPI_ISL_1288415 | 13/02/2021 | Mexico City     | Human | Female | 44 | Hospitalized | Original | Oropharyngeal swab                    |
| hCoV-19/Mexico/MEX-IBT-IMSS-222/2021     | EPI_ISL_1288416 | 13/02/2021 | State of Mexico | Human | Female | 67 | Ambulatory   | Original | Oropharyngeal swab                    |
| hCoV-19/Mexico/CMX-IBT-IMSS-225/2021     | EPI_ISL_1288419 | 13/02/2021 | Mexico City     | Human | Female | 64 | Ambulatory   | Original | Oropharyngeal swab                    |
| hCoV-19/Mexico/MEX-IBT-IMSS-318/2021     | EPI_ISL_1288500 | 13/02/2021 | State of Mexico | Human | Male   | 62 | Ambulatory   | Original | Nasopharyngeal and oropharyngeal swab |
| hCoV-19/Mexico/MOR-IBT-IMSS-319/2021     | EPI_ISL_1288501 | 13/02/2021 | Morelos         | Human | Male   | 65 | Ambulatory   | Original | Nasopharyngeal and oropharyngeal swab |
| hCoV-19/Mexico/MOR-IBT-IMSS-320/2021     | EPI_ISL_1288502 | 13/02/2021 | Morelos         | Human | Male   | 72 | Hospitalized | Original | Nasopharyngeal and oropharyngeal swab |
| hCoV-19/Mexico/MOR-IBT-IMSS-321/2021     | EPI_ISL_1288503 | 13/02/2021 | Morelos         | Human | Female | 65 | Hospitalized | Original | Nasopharyngeal and oropharyngeal swab |
| hCoV-19/Mexico/MOR-IBT-IMSS-322/2021     | EPI_ISL_1288504 | 13/02/2021 | Morelos         | Human | Female | 67 | Hospitalized | Original | Nasopharyngeal and oropharyngeal swab |
| hCoV-19/Mexico/MOR-IBT-IMSS-323/2021     | EPI_ISL_1288505 | 13/02/2021 | Morelos         | Human | Male   | 52 | Ambulatory   | Original | Nasopharyngeal and oropharyngeal swab |
| hCoV-19/Mexico/MOR-IBT-IMSS-324/2021     | EPI_ISL_1288506 | 13/02/2021 | Morelos         | Human | Male   | 54 | Hospitalized | Original | Nasopharyngeal and oropharyngeal swab |
| hCoV-19/Mexico/CMX-IBT-IMSS-326/2021     | EPI_ISL_1288507 | 13/02/2021 | Mexico City     | Human | Male   | 72 | Hospitalized | Original | Nasopharyngeal swab                   |
| hCoV-19/Mexico/CMX-IBT-IMSS-327/2021     | EPI_ISL_1288508 | 13/02/2021 | Mexico City     | Human | Female | 62 | Hospitalized | Original | Nasopharyngeal swab                   |
| hCoV-19/Mexico/CMX-IBT-IMSS-328/2021     | EPI_ISL_1288509 | 13/02/2021 | Mexico City     | Human | Female | 81 | Hospitalized | Original | Nasopharyngeal swab                   |
| hCoV-19/Mexico/CMX-IBT-IMSS-329/2021     | EPI_ISL_1288510 | 13/02/2021 | Mexico City     | Human | Male   | 39 | Hospitalized | Original | Nasopharyngeal swab                   |
| hCoV-19/Mexico/CMX-IBT-IMSS-330/2021     | EPI_ISL_1288511 | 13/02/2021 | Mexico City     | Human | Male   | 53 | Hospitalized | Original | Nasopharyngeal swab                   |
| hCoV-19/Mexico/CMX-IBT-IMSS-331/2021     | EPI_ISL_1288512 | 13/02/2021 | Mexico City     | Human | Male   | 52 | Hospitalized | Original | Nasopharyngeal swab                   |
| hCoV-19/Mexico/HID-IBT-IMSS-332/2021     | EPI_ISL_1288513 | 13/02/2021 | Hidalgo         | Human | Female | 33 | Ambulatory   | Original | Oropharyngeal swab                    |
| hCoV-19/Mexico/HID-IBT-IMSS-333/2021     | EPI_ISL_1288514 | 13/02/2021 | Hidalgo         | Human | Female | 30 | Ambulatory   | Original | Oropharyngeal swab                    |
| hCoV-19/Mexico/CMX-IBT-IMSS-334/2021     | EPI_ISL_1288515 | 13/02/2021 | Mexico City     | Human | Female | 66 | Ambulatory   | Original | Nasopharyngeal and oropharyngeal swab |
| hCoV-19/Mexico/TAM_LANGEBIO-IMSS_0007/20 | EPI_ISL_1351426 | 13/02/2021 | Nuevo Leon      | Human | Male   | 80 | Hospitalized | Original | Pharyngeal and Nasopharyngeal swab    |
| hCoV-19/Mexico/NLE-INER-IMSS-00213/2021  | EPI_ISL_1279479 | 13/02/2021 | Nuevo Leon      | Human | Male   | 75 | Hospitalized | Original | Nasopharyngeal and oropharyngeal swab |
| hCoV-19/Mexico/NLE-INER-IMSS-00214/2021  | EPI_ISL_1279480 | 13/02/2021 | Nuevo Leon      | Human | Male   | 62 | Ambulatory   | Original | Nasopharyngeal and oropharyngeal swab |
| hCoV-19/Mexico/NLE-INER-IMSS-00215/2021  | EPI_ISL_1279481 | 13/02/2021 | Nuevo Leon      | Human | Male   | 64 | Hospitalized | Original | Nasopharyngeal and oropharyngeal swab |
| hCoV-19/Mexico/COA-INER-IMSS-00240/2021  | EPI_ISL_1279504 | 13/02/2021 | Coahuila        | Human | Female | 31 | Hospitalized | Original | Nasopharyngeal and oropharyngeal swab |
| hCoV-19/Mexico/COA-INER-IMSS-00241/2021  | EPI_ISL_1279505 | 13/02/2021 | Coahuila        | Human | Female | 45 | Ambulatory   | Original | Nasopharyngeal and oropharyngeal swab |
| hCoV-19/Mexico/COA-INER-IMSS-00246/2021  | EPI_ISL_1279509 | 13/02/2021 | Coahuila        | Human | Female | 44 | Hospitalized | Original | Nasopharyngeal and oropharyngeal swab |
| hCoV-19/Mexico/CHH-INER-IMSS-00251/2021  | EPI_ISL_1279513 | 13/02/2021 | Chihuahua       | Human | Male   | 61 | Hospitalized | Original | Nasopharyngeal and oropharyngeal swab |
| hCoV-19/Mexico/CHH-INER-IMSS-00272/2021  | EPI_ISL_1279531 | 13/02/2021 | Chihuahua       | Human | Female | 68 | Hospitalized | Original | Nasopharyngeal and oropharyngeal swab |
| hCoV-19/Mexico/HID-IBT-IMSS-254/2021     | EPI_ISL_1288443 | 13/02/2021 | Hidalgo         | Human | Female | 57 | Hospitalized | Original | Oropharyngeal swab                    |
| hCoV-19/Mexico/CMX-IBT-IMSS-284/2021     | EPI_ISL_1288470 | 13/02/2021 | Mexico City     | Human | Male   | 62 | Ambulatory   | Original | Nasopharyngeal and oropharyngeal swab |
| hCoV-19/Mexico/SLP-IBT-IMSS-288/2021     | EPI_ISL_1288474 | 13/02/2021 | San Luis Potosi | Human | Female | 68 | Hospitalized | Original | Nasopharyngeal and oropharyngeal swab |
| hCoV-19/Mexico/CMX-IBT-IMSS-290/2021     | EPI_ISL_1288476 | 13/02/2021 | Mexico City     | Human | Male   | 10 | Ambulatory   | Original | Nasopharyngeal and oropharyngeal swab |
| hCoV-19/Mexico/CMX-IBT-IMSS-296/2021     | EPI_ISL_1288481 | 13/02/2021 | Mexico City     | Human | Male   | 68 | Hospitalized | Original | Nasopharyngeal and oropharyngeal swab |
| hCoV-19/Mexico/CMX-IBT-IMSS-297/2021     | EPI_ISL_1288482 | 13/02/2021 | Mexico City     | Human | Female | 56 | Hospitalized | Original | Nasopharyngeal and oropharyngeal swab |

|                                                         |                                 |            |                 |       |        |    |              |          |                                       |
|---------------------------------------------------------|---------------------------------|------------|-----------------|-------|--------|----|--------------|----------|---------------------------------------|
| <a href="#">hCoV-19/Mexico/MEX-IBT-IMSS-299/2021</a>    | <a href="#">EPI_ISL_1288484</a> | 13/02/2021 | State of Mexico | Human | Male   | 60 | Hospitalized | Original | Nasopharyngeal and oropharyngeal swab |
| <a href="#">hCoV-19/Mexico/CMX-IBT-IMSS-300/2021</a>    | <a href="#">EPI_ISL_1288485</a> | 13/02/2021 | Mexico City     | Human | Male   | 74 | Hospitalized | Original | Nasopharyngeal and oropharyngeal swab |
| <a href="#">hCoV-19/Mexico/MEX-IBT-IMSS-313/2021</a>    | <a href="#">EPI_ISL_1288496</a> | 13/02/2021 | State of Mexico | Human | Female | 79 | Hospitalized | Original | Nasopharyngeal and oropharyngeal swab |
| <a href="#">hCoV-19/Mexico/CMX-IBT-IMSS-317/2021</a>    | <a href="#">EPI_ISL_1288499</a> | 13/02/2021 | Mexico City     | Human | Male   | 72 | Hospitalized | Original | Nasopharyngeal and oropharyngeal swab |
| <a href="#">hCoV-19/Mexico/ZAC-INER-IMSS-00037/2021</a> | <a href="#">EPI_ISL_1279336</a> | 13/02/2021 | Zacatecas       | Human | Female | 54 | Ambulatory   | Original | Nasopharyngeal and oropharyngeal swab |
| <a href="#">hCoV-19/Mexico/ZAC-INER-IMSS-00038/2021</a> | <a href="#">EPI_ISL_1279337</a> | 13/02/2021 | Zacatecas       | Human | Male   | 43 | Ambulatory   | Original | Nasopharyngeal and oropharyngeal swab |
| <a href="#">hCoV-19/Mexico/ZAC-INER-IMSS-00040/2021</a> | <a href="#">EPI_ISL_1279339</a> | 13/02/2021 | Zacatecas       | Human | Female | 55 | Ambulatory   | Original | Nasopharyngeal and oropharyngeal swab |
| <a href="#">hCoV-19/Mexico/ZAC-INER-IMSS-00041/2021</a> | <a href="#">EPI_ISL_1279340</a> | 13/02/2021 | Zacatecas       | Human | Female | 44 | Ambulatory   | Original | Nasopharyngeal and oropharyngeal swab |
| <a href="#">hCoV-19/Mexico/ZAC-INER-IMSS-00042/2021</a> | <a href="#">EPI_ISL_1279341</a> | 13/02/2021 | Zacatecas       | Human | Female | 35 | Ambulatory   | Original | Nasopharyngeal and oropharyngeal swab |
| <a href="#">hCoV-19/Mexico/ZAC-INER-IMSS-00043/2021</a> | <a href="#">EPI_ISL_1279342</a> | 13/02/2021 | Zacatecas       | Human | Male   | 41 | Ambulatory   | Original | Nasopharyngeal and oropharyngeal swab |
| <a href="#">hCoV-19/Mexico/ZAC-INER-IMSS-00051/2021</a> | <a href="#">EPI_ISL_1279349</a> | 13/02/2021 | Zacatecas       | Human | Female | 44 | Ambulatory   | Original | Nasopharyngeal and oropharyngeal swab |
| <a href="#">hCoV-19/Mexico/ZAC-INER-IMSS-00052/2021</a> | <a href="#">EPI_ISL_1279279</a> | 14/02/2021 | Zacatecas       | Human | Female | 50 | Ambulatory   | Original | Nasopharyngeal and oropharyngeal swab |
| <a href="#">hCoV-19/Mexico/ZAC-INER-IMSS-00050/2021</a> | <a href="#">EPI_ISL_1287762</a> | 14/02/2021 | Zacatecas       | Human | Female | 92 | Ambulatory   | Original | Nasopharyngeal and oropharyngeal swab |
| <a href="#">hCoV-19/Mexico/YUC-INER-IMSS-00370/2021</a> | <a href="#">EPI_ISL_1279613</a> | 14/02/2021 | Yucatan         | Human | Female | 90 | Hospitalized | Original | Nasopharyngeal and oropharyngeal swab |
| <a href="#">hCoV-19/Mexico/CMX-IBT-IMSS-341/2021</a>    | <a href="#">EPI_ISL_1288520</a> | 14/02/2021 | Mexico City     | Human | Female | 7  | Ambulatory   | Original | Nasopharyngeal and oropharyngeal swab |
| <a href="#">hCoV-19/Mexico/CMX-IBT-IMSS-342/2021</a>    | <a href="#">EPI_ISL_1288521</a> | 14/02/2021 | Mexico City     | Human | Male   | 56 | Hospitalized | Original | Oropharyngeal swab                    |
| <a href="#">hCoV-19/Mexico/MEX-IBT-IMSS-344/2021</a>    | <a href="#">EPI_ISL_1288523</a> | 14/02/2021 | State of Mexico | Human | Male   | 67 | Hospitalized | Original | Nasopharyngeal and oropharyngeal swab |
| <a href="#">hCoV-19/Mexico/CMX-IBT-IMSS-355/2021</a>    | <a href="#">EPI_ISL_1288532</a> | 14/02/2021 | Mexico City     | Human | Male   | 38 | Hospitalized | Original | Nasopharyngeal and oropharyngeal swab |
| <a href="#">hCoV-19/Mexico/MEX-IBT-IMSS-356/2021</a>    | <a href="#">EPI_ISL_1288533</a> | 14/02/2021 | State of Mexico | Human | Male   | 56 | Hospitalized | Original | Nasopharyngeal and oropharyngeal swab |
| <a href="#">hCoV-19/Mexico/NLE-INER-IMSS-00221/2021</a> | <a href="#">EPI_ISL_1279486</a> | 14/02/2021 | Nuevo Leon      | Human | Female | 26 | Ambulatory   | Original | Nasopharyngeal and oropharyngeal swab |
| <a href="#">hCoV-19/Mexico/NLE-INER-IMSS-00222/2021</a> | <a href="#">EPI_ISL_1279487</a> | 14/02/2021 | Nuevo Leon      | Human | Female | 73 | Hospitalized | Original | Nasopharyngeal swab                   |
| <a href="#">hCoV-19/Mexico/NLE-INER-IMSS-00223/2021</a> | <a href="#">EPI_ISL_1279488</a> | 14/02/2021 | Nuevo Leon      | Human | Male   | 75 | Hospitalized | Original | Nasopharyngeal and oropharyngeal swab |
| <a href="#">hCoV-19/Mexico/COA-INER-IMSS-00239/2021</a> | <a href="#">EPI_ISL_1279503</a> | 14/02/2021 | Coahuila        | Human | Female | 48 | Hospitalized | Original | Nasopharyngeal and oropharyngeal swab |
| <a href="#">hCoV-19/Mexico/NLE-INER-IMSS-00279/2021</a> | <a href="#">EPI_ISL_1279536</a> | 14/02/2021 | Nuevo Leon      | Human | Male   | 79 | Hospitalized | Original | Nasopharyngeal and oropharyngeal swab |
| <a href="#">hCoV-19/Mexico/CMX-IBT-IMSS-285/2021</a>    | <a href="#">EPI_ISL_1288471</a> | 14/02/2021 | Mexico City     | Human | Male   | 77 | Hospitalized | Original | Nasopharyngeal and oropharyngeal swab |
| <a href="#">hCoV-19/Mexico/MEX-IBT-IMSS-286/2021</a>    | <a href="#">EPI_ISL_1288472</a> | 14/02/2021 | State of Mexico | Human | Male   | 67 | Hospitalized | Original | Nasopharyngeal and oropharyngeal swab |
| <a href="#">hCoV-19/Mexico/CMX-IBT-IMSS-298/2021</a>    | <a href="#">EPI_ISL_1288483</a> | 14/02/2021 | Mexico City     | Human | Male   | 82 | Hospitalized | Original | Nasopharyngeal and oropharyngeal swab |
| <a href="#">hCoV-19/Mexico/CMX-IBT-IMSS-301/2021</a>    | <a href="#">EPI_ISL_1288486</a> | 14/02/2021 | Mexico City     | Human | Female | 58 | Ambulatory   | Original | Nasopharyngeal swab                   |
| <a href="#">hCoV-19/Mexico/MEX-IBT-IMSS-312/2021</a>    | <a href="#">EPI_ISL_1288495</a> | 14/02/2021 | State of Mexico | Human | Female | 70 | Hospitalized | Original | Nasopharyngeal and oropharyngeal swab |
| <a href="#">hCoV-19/Mexico/MEX-IBT-IMSS-315/2021</a>    | <a href="#">EPI_ISL_1288497</a> | 14/02/2021 | State of Mexico | Human | Male   | 66 | Hospitalized | Original | Nasopharyngeal and oropharyngeal swab |
| <a href="#">hCoV-19/Mexico/ZAC-INER-IMSS-00044/2021</a> | <a href="#">EPI_ISL_1279343</a> | 14/02/2021 | Zacatecas       | Human | Male   | 77 | Ambulatory   | Original | Nasopharyngeal and oropharyngeal swab |
| <a href="#">hCoV-19/Mexico/ZAC-INER-IMSS-00045/2021</a> | <a href="#">EPI_ISL_1279344</a> | 14/02/2021 | Zacatecas       | Human | Female | 19 | Ambulatory   | Original | Nasopharyngeal and oropharyngeal swab |
| <a href="#">hCoV-19/Mexico/ZAC-INER-IMSS-00046/2021</a> | <a href="#">EPI_ISL_1279345</a> | 14/02/2021 | Zacatecas       | Human | Female | 57 | Ambulatory   | Original | Nasopharyngeal and oropharyngeal swab |
| <a href="#">hCoV-19/Mexico/ZAC-INER-IMSS-00047/2021</a> | <a href="#">EPI_ISL_1279346</a> | 14/02/2021 | Zacatecas       | Human | Male   | 59 | Hospitalized | Original | Nasopharyngeal and oropharyngeal swab |
| <a href="#">hCoV-19/Mexico/ZAC-INER-IMSS-00048/2021</a> | <a href="#">EPI_ISL_1279347</a> | 14/02/2021 | Zacatecas       | Human | Female | 71 | Hospitalized | Original | Nasopharyngeal and oropharyngeal swab |
| <a href="#">hCoV-19/Mexico/ZAC-INER-IMSS-00049/2021</a> | <a href="#">EPI_ISL_1279348</a> | 14/02/2021 | Zacatecas       | Human | Female | 31 | Ambulatory   | Original | Nasopharyngeal and oropharyngeal swab |
| <a href="#">hCoV-19/Mexico/COA-INER-IMSS-00242/2021</a> | <a href="#">EPI_ISL_1279267</a> | 15/02/2021 | Coahuila        | Human | Male   | 36 | Ambulatory   | Original | Nasopharyngeal and oropharyngeal swab |
| <a href="#">hCoV-19/Mexico/ZAC-INER-IMSS-00058/2021</a> | <a href="#">EPI_ISL_1279270</a> | 15/02/2021 | Zacatecas       | Human | Male   | 80 | Hospitalized | Original | Nasopharyngeal and oropharyngeal swab |
| <a href="#">hCoV-19/Mexico/ZAC-INER-IMSS-00054/2021</a> | <a href="#">EPI_ISL_1279280</a> | 15/02/2021 | Zacatecas       | Human | Male   | 49 | Ambulatory   | Original | Nasopharyngeal and oropharyngeal swab |
| <a href="#">hCoV-19/Mexico/ZAC-INER-IMSS-00055/2021</a> | <a href="#">EPI_ISL_1279295</a> | 15/02/2021 | Zacatecas       | Human | Male   | 52 | Ambulatory   | Original | Nasopharyngeal and oropharyngeal swab |
| <a href="#">hCoV-19/Mexico/ZAC-INER-IMSS-00059/2021</a> | <a href="#">EPI_ISL_1287763</a> | 15/02/2021 | Zacatecas       | Human | Male   | 41 | Ambulatory   | Original | Nasopharyngeal and oropharyngeal swab |

|                                         |                 |            |                 |       |        |    |              |          |                                       |
|-----------------------------------------|-----------------|------------|-----------------|-------|--------|----|--------------|----------|---------------------------------------|
| hCoV-19/Mexico/MEX-IBT-IMSS-343/2021    | EPI_ISL_1288522 | 15/02/2021 | State of Mexico | Human | Male   | 67 | Hospitalized | Original | Nasopharyngeal swab                   |
| hCoV-19/Mexico/VER-INER-IMSS-00174/2021 | EPI_ISL_1279448 | 15/02/2021 | Veracruz        | Human | Female | 81 | Hospitalized | Original | Nasopharyngeal and oropharyngeal swab |
| hCoV-19/Mexico/NLE-INER-IMSS-00224/2021 | EPI_ISL_1279489 | 15/02/2021 | Nuevo Leon      | Human | Female | 54 | Ambulatory   | Original | Nasopharyngeal and oropharyngeal swab |
| hCoV-19/Mexico/NLE-INER-IMSS-00225/2021 | EPI_ISL_1279490 | 15/02/2021 | Nuevo Leon      | Human | Male   | 27 | Ambulatory   | Original | Nasopharyngeal and oropharyngeal swab |
| hCoV-19/Mexico/NLE-INER-IMSS-00226/2021 | EPI_ISL_1279491 | 15/02/2021 | Nuevo Leon      | Human | Male   | 29 | Ambulatory   | Original | Nasopharyngeal and oropharyngeal swab |
| hCoV-19/Mexico/DUR-INER-IMSS-00228/2021 | EPI_ISL_1279493 | 15/02/2021 | Durango         | Human | Female | 13 | Ambulatory   | Original | Nasopharyngeal and oropharyngeal swab |
| hCoV-19/Mexico/DUR-INER-IMSS-00229/2021 | EPI_ISL_1279494 | 15/02/2021 | Durango         | Human | Female | 37 | Ambulatory   | Original | Nasopharyngeal and oropharyngeal swab |
| hCoV-19/Mexico/NLE-INER-IMSS-00231/2021 | EPI_ISL_1279495 | 15/02/2021 | Nuevo Leon      | Human | Female | 38 | Ambulatory   | Original | Nasopharyngeal and oropharyngeal swab |
| hCoV-19/Mexico/COA-INER-IMSS-00243/2021 | EPI_ISL_1279506 | 15/02/2021 | Coahuila        | Human | Female | 34 | Hospitalized | Original | Nasopharyngeal and oropharyngeal swab |
| hCoV-19/Mexico/COA-INER-IMSS-00244/2021 | EPI_ISL_1279507 | 15/02/2021 | Coahuila        | Human | Male   | 43 | Hospitalized | Original | Nasopharyngeal and oropharyngeal swab |
| hCoV-19/Mexico/COA-INER-IMSS-00245/2021 | EPI_ISL_1279508 | 15/02/2021 | Coahuila        | Human | Female | 59 | Ambulatory   | Original | Nasopharyngeal and oropharyngeal swab |
| hCoV-19/Mexico/COA-INER-IMSS-00248/2021 | EPI_ISL_1279511 | 15/02/2021 | Coahuila        | Human | Male   | 51 | Ambulatory   | Original | Nasopharyngeal and oropharyngeal swab |
| hCoV-19/Mexico/COA-INER-IMSS-00256/2021 | EPI_ISL_1279518 | 15/02/2021 | Coahuila        | Human | Male   | 81 | Hospitalized | Original | Nasopharyngeal and oropharyngeal swab |
| hCoV-19/Mexico/ZAC-INER-IMSS-00068/2021 | EPI_ISL_1279300 | 15/02/2021 | Zacatecas       | Human | Female | 31 | Ambulatory   | Original | Nasopharyngeal and oropharyngeal swab |
| hCoV-19/Mexico/ZAC-INER-IMSS-00053/2021 | EPI_ISL_1279350 | 15/02/2021 | Zacatecas       | Human | Female | 28 | Ambulatory   | Original | Nasopharyngeal and oropharyngeal swab |
| hCoV-19/Mexico/ZAC-INER-IMSS-00056/2021 | EPI_ISL_1279351 | 15/02/2021 | Zacatecas       | Human | Male   | 56 | Hospitalized | Original | Nasopharyngeal and oropharyngeal swab |
| hCoV-19/Mexico/ZAC-INER-IMSS-00057/2021 | EPI_ISL_1279352 | 15/02/2021 | Zacatecas       | Human | Female | 33 | Ambulatory   | Original | Nasopharyngeal and oropharyngeal swab |
| hCoV-19/Mexico/ZAC-INER-IMSS-00060/2021 | EPI_ISL_1279353 | 15/02/2021 | Zacatecas       | Human | Female | 55 | Ambulatory   | Original | Nasopharyngeal and oropharyngeal swab |
| hCoV-19/Mexico/ZAC-INER-IMSS-00061/2021 | EPI_ISL_1279354 | 15/02/2021 | Zacatecas       | Human | Male   | 43 | Ambulatory   | Original | Nasopharyngeal and oropharyngeal swab |
| hCoV-19/Mexico/ZAC-INER-IMSS-00062/2021 | EPI_ISL_1279355 | 15/02/2021 | Zacatecas       | Human | Male   | 50 | Ambulatory   | Original | Nasopharyngeal and oropharyngeal swab |
| hCoV-19/Mexico/ZAC-INER-IMSS-00063/2021 | EPI_ISL_1279356 | 15/02/2021 | Zacatecas       | Human | Male   | 27 | Ambulatory   | Original | Nasopharyngeal and oropharyngeal swab |
| hCoV-19/Mexico/ZAC-INER-IMSS-00064/2021 | EPI_ISL_1279357 | 15/02/2021 | Zacatecas       | Human | Male   | 57 | Ambulatory   | Original | Nasopharyngeal and oropharyngeal swab |
| hCoV-19/Mexico/ZAC-INER-IMSS-00065/2021 | EPI_ISL_1279358 | 15/02/2021 | Zacatecas       | Human | Female | 25 | Ambulatory   | Original | Nasopharyngeal and oropharyngeal swab |
| hCoV-19/Mexico/ZAC-INER-IMSS-00067/2021 | EPI_ISL_1279360 | 15/02/2021 | Zacatecas       | Human | Female | 60 | Hospitalized | Original | Nasopharyngeal and oropharyngeal swab |
| hCoV-19/Mexico/ZAC-INER-IMSS-00082/2021 | EPI_ISL_1279369 | 15/02/2021 | Zacatecas       | Human | Male   | 56 | Ambulatory   | Original | Nasopharyngeal and oropharyngeal swab |
| hCoV-19/Mexico/ZAC-INER-IMSS-00075/2021 | EPI_ISL_1279272 | 16/02/2021 | Zacatecas       | Human | Female | 27 | Ambulatory   | Original | Nasopharyngeal and oropharyngeal swab |
| hCoV-19/Mexico/ZAC-INER-IMSS-00077/2021 | EPI_ISL_1279273 | 16/02/2021 | Zacatecas       | Human | Male   | 19 | Ambulatory   | Original | Nasopharyngeal and oropharyngeal swab |
| hCoV-19/Mexico/NLE-INER-IMSS-00230/2021 | EPI_ISL_1279285 | 16/02/2021 | Nuevo Leon      | Human | Female | 59 | Hospitalized | Original | Nasopharyngeal and oropharyngeal swab |
| hCoV-19/Mexico/ZAC-INER-IMSS-00078/2021 | EPI_ISL_1287764 | 16/02/2021 | Zacatecas       | Human | Female | 66 | Ambulatory   | Original | Nasopharyngeal and oropharyngeal swab |
| hCoV-19/Mexico/ZAC-INER-IMSS-00079/2021 | EPI_ISL_1287765 | 16/02/2021 | Zacatecas       | Human | Male   | 53 | Ambulatory   | Original | Nasopharyngeal and oropharyngeal swab |
| hCoV-19/Mexico/DUR-INER-IMSS-00273/2021 | EPI_ISL_1287772 | 16/02/2021 | Durango         | Human | Female | 50 | Ambulatory   | Original | Nasopharyngeal and oropharyngeal swab |
| hCoV-19/Mexico/TAM-INER-IMSS-00278/2021 | EPI_ISL_1287773 | 16/02/2021 | Tamaulipas      | Human | Male   | 64 | Hospitalized | Original | Nasopharyngeal and oropharyngeal swab |
| hCoV-19/Mexico/ZAC-INER-IMSS-00083/2021 | EPI_ISL_1279370 | 16/02/2021 | Zacatecas       | Human | Male   | 38 | Ambulatory   | Original | Nasopharyngeal and oropharyngeal swab |
| hCoV-19/Mexico/ZAC-INER-IMSS-00084/2021 | EPI_ISL_1279371 | 16/02/2021 | Zacatecas       | Human | Male   | 59 | Ambulatory   | Original | Nasopharyngeal and oropharyngeal swab |
| hCoV-19/Mexico/PUE-INER-IMSS-00140/2021 | EPI_ISL_1279419 | 16/02/2021 | Puebla          | Human | Female | 33 | Ambulatory   | Original | Nasopharyngeal and oropharyngeal swab |
| hCoV-19/Mexico/PUE-INER-IMSS-00144/2021 | EPI_ISL_1279423 | 16/02/2021 | Puebla          | Human | Female | 61 | Hospitalized | Original | Nasopharyngeal and oropharyngeal swab |
| hCoV-19/Mexico/NLE-INER-IMSS-00232/2021 | EPI_ISL_1279496 | 16/02/2021 | Nuevo Leon      | Human | Female | 47 | Ambulatory   | Original | Nasopharyngeal and oropharyngeal swab |
| hCoV-19/Mexico/NLE-INER-IMSS-00233/2021 | EPI_ISL_1279497 | 16/02/2021 | Nuevo Leon      | Human | Female | 26 | Ambulatory   | Original | Nasopharyngeal and oropharyngeal swab |
| hCoV-19/Mexico/NLE-INER-IMSS-00234/2021 | EPI_ISL_1279498 | 16/02/2021 | Nuevo Leon      | Human | Male   | 70 | Hospitalized | Original | Nasopharyngeal and oropharyngeal swab |
| hCoV-19/Mexico/NLE-INER-IMSS-00235/2021 | EPI_ISL_1279499 | 16/02/2021 | Nuevo Leon      | Human | Female | 45 | Ambulatory   | Original | Nasopharyngeal swab                   |
| hCoV-19/Mexico/NLE-INER-IMSS-00236/2021 | EPI_ISL_1279500 | 16/02/2021 | Nuevo Leon      | Human | Female | 62 | Hospitalized | Original | Nasopharyngeal and oropharyngeal swab |



|                                                         |                                 |            |                 |       |        |    |              |          |                                       |
|---------------------------------------------------------|---------------------------------|------------|-----------------|-------|--------|----|--------------|----------|---------------------------------------|
| <a href="#">hCoV-19/Mexico/NLE-INER-IMSS-00237/2021</a> | <a href="#">EPI_ISL_1279501</a> | 16/02/2021 | Nuevo Leon      | Human | Male   | 87 | Hospitalized | Original | Nasopharyngeal and oropharyngeal swab |
| <a href="#">hCoV-19/Mexico/COA-INER-IMSS-00238/2021</a> | <a href="#">EPI_ISL_1279502</a> | 16/02/2021 | Coahuila        | Human | Female | 21 | Hospitalized | Original | Nasopharyngeal and oropharyngeal swab |
| <a href="#">hCoV-19/Mexico/TAM-INER-IMSS-00254/2021</a> | <a href="#">EPI_ISL_1279516</a> | 16/02/2021 | Tamaulipas      | Human | Male   | 41 | Ambulatory   | Original | Nasopharyngeal and oropharyngeal swab |
| <a href="#">hCoV-19/Mexico/CHH-INER-IMSS-00269/2021</a> | <a href="#">EPI_ISL_1279528</a> | 16/02/2021 | Chihuahua       | Human | Female | 52 | Hospitalized | Original | Nasopharyngeal and oropharyngeal swab |
| <a href="#">hCoV-19/Mexico/DUR-INER-IMSS-00275/2021</a> | <a href="#">EPI_ISL_1279533</a> | 16/02/2021 | Durango         | Human | Female | 33 | Ambulatory   | Original | Nasopharyngeal and oropharyngeal swab |
| <a href="#">hCoV-19/Mexico/NLE-INER-IMSS-00249/2021</a> | <a href="#">EPI_ISL_1279302</a> | 16/02/2021 | Nuevo Leon      | Human | Male   | 34 | Ambulatory   | Original | Nasopharyngeal and oropharyngeal swab |
| <a href="#">hCoV-19/Mexico/ZAC-INER-IMSS-00066/2021</a> | <a href="#">EPI_ISL_1279359</a> | 16/02/2021 | Zacatecas       | Human | Male   | 72 | Hospitalized | Original | Nasopharyngeal and oropharyngeal swab |
| <a href="#">hCoV-19/Mexico/ZAC-INER-IMSS-00069/2021</a> | <a href="#">EPI_ISL_1279361</a> | 16/02/2021 | Zacatecas       | Human | Male   | 43 | Ambulatory   | Original | Nasopharyngeal and oropharyngeal swab |
| <a href="#">hCoV-19/Mexico/ZAC-INER-IMSS-00070/2021</a> | <a href="#">EPI_ISL_1279362</a> | 16/02/2021 | Zacatecas       | Human | Female | 46 | Ambulatory   | Original | Nasopharyngeal and oropharyngeal swab |
| <a href="#">hCoV-19/Mexico/ZAC-INER-IMSS-00071/2021</a> | <a href="#">EPI_ISL_1279363</a> | 16/02/2021 | Zacatecas       | Human | Female | 43 | Ambulatory   | Original | Nasopharyngeal and oropharyngeal swab |
| <a href="#">hCoV-19/Mexico/ZAC-INER-IMSS-00072/2021</a> | <a href="#">EPI_ISL_1279364</a> | 16/02/2021 | Zacatecas       | Human | Male   | 28 | Ambulatory   | Original | Nasopharyngeal and oropharyngeal swab |
| <a href="#">hCoV-19/Mexico/ZAC-INER-IMSS-00073/2021</a> | <a href="#">EPI_ISL_1279365</a> | 16/02/2021 | Zacatecas       | Human | Female | 44 | Ambulatory   | Original | Nasopharyngeal and oropharyngeal swab |
| <a href="#">hCoV-19/Mexico/ZAC-INER-IMSS-00074/2021</a> | <a href="#">EPI_ISL_1279366</a> | 16/02/2021 | Zacatecas       | Human | Male   | 37 | Ambulatory   | Original | Nasopharyngeal and oropharyngeal swab |
| <a href="#">hCoV-19/Mexico/ZAC-INER-IMSS-00076/2021</a> | <a href="#">EPI_ISL_1279367</a> | 16/02/2021 | Zacatecas       | Human | Female | 26 | Ambulatory   | Original | Nasopharyngeal and oropharyngeal swab |
| <a href="#">hCoV-19/Mexico/ZAC-INER-IMSS-00080/2021</a> | <a href="#">EPI_ISL_1279368</a> | 16/02/2021 | Zacatecas       | Human | Female | 50 | Ambulatory   | Original | Nasopharyngeal and oropharyngeal swab |
| <a href="#">hCoV-19/Mexico/ZAC-INER-IMSS-00086/2021</a> | <a href="#">EPI_ISL_1287767</a> | 17/02/2021 | Zacatecas       | Human | Female | 38 | Ambulatory   | Original | Nasopharyngeal and oropharyngeal swab |
| <a href="#">hCoV-19/Mexico/PUE-INER-IMSS-00125/2021</a> | <a href="#">EPI_ISL_1287768</a> | 17/02/2021 | Puebla          | Human | Male   | 25 | Ambulatory   | Original | Nasopharyngeal and oropharyngeal swab |
| <a href="#">hCoV-19/Mexico/ZAC-INER-IMSS-00085/2021</a> | <a href="#">EPI_ISL_1279372</a> | 17/02/2021 | Zacatecas       | Human | Male   | 38 | Ambulatory   | Original | Nasopharyngeal and oropharyngeal swab |
| <a href="#">hCoV-19/Mexico/ZAC-INER-IMSS-00087/2021</a> | <a href="#">EPI_ISL_1279373</a> | 17/02/2021 | Zacatecas       | Human | Male   | 87 | Hospitalized | Original | Nasopharyngeal and oropharyngeal swab |
| <a href="#">hCoV-19/Mexico/PUE-INER-IMSS-00121/2021</a> | <a href="#">EPI_ISL_1279403</a> | 17/02/2021 | Puebla          | Human | Female | 55 | Ambulatory   | Original | Nasopharyngeal and oropharyngeal swab |
| <a href="#">hCoV-19/Mexico/PUE-INER-IMSS-00141/2021</a> | <a href="#">EPI_ISL_1279420</a> | 17/02/2021 | Puebla          | Human | Male   | 53 | Hospitalized | Original | Nasopharyngeal and oropharyngeal swab |
| <a href="#">hCoV-19/Mexico/PUE-INER-IMSS-00142/2021</a> | <a href="#">EPI_ISL_1279421</a> | 17/02/2021 | Puebla          | Human | Male   | 82 | Hospitalized | Original | Nasopharyngeal and oropharyngeal swab |
| <a href="#">hCoV-19/Mexico/PUE-INER-IMSS-00143/2021</a> | <a href="#">EPI_ISL_1279422</a> | 17/02/2021 | Puebla          | Human | Male   | 58 | Hospitalized | Original | Nasopharyngeal and oropharyngeal swab |
| <a href="#">hCoV-19/Mexico/PUE-INER-IMSS-00149/2021</a> | <a href="#">EPI_ISL_1279427</a> | 17/02/2021 | Puebla          | Human | Female | 34 | Ambulatory   | Original | Nasopharyngeal and oropharyngeal swab |
| <a href="#">hCoV-19/Mexico/VER-INER-IMSS-00175/2021</a> | <a href="#">EPI_ISL_1279449</a> | 17/02/2021 | Veracruz        | Human | Male   | 50 | Ambulatory   | Original | Nasopharyngeal and oropharyngeal swab |
| <a href="#">hCoV-19/Mexico/NLE-INER-IMSS-00250/2021</a> | <a href="#">EPI_ISL_1279512</a> | 17/02/2021 | Nuevo Leon      | Human | Male   | 63 | Ambulatory   | Original | Nasopharyngeal and oropharyngeal swab |
| <a href="#">hCoV-19/Mexico/NLE-INER-IMSS-00252/2021</a> | <a href="#">EPI_ISL_1279514</a> | 17/02/2021 | Nuevo Leon      | Human | Female | 77 | Ambulatory   | Original | Nasopharyngeal and oropharyngeal swab |
| <a href="#">hCoV-19/Mexico/NLE-INER-IMSS-00253/2021</a> | <a href="#">EPI_ISL_1279515</a> | 17/02/2021 | Nuevo Leon      | Human | Male   | 89 | Hospitalized | Original | Nasopharyngeal and oropharyngeal swab |
| <a href="#">hCoV-19/Mexico/TAM-INER-IMSS-00255/2021</a> | <a href="#">EPI_ISL_1279517</a> | 17/02/2021 | Tamaulipas      | Human | Female | 45 | Ambulatory   | Original | Nasopharyngeal and oropharyngeal swab |
| <a href="#">hCoV-19/Mexico/COA-INER-IMSS-00257/2021</a> | <a href="#">EPI_ISL_1279519</a> | 17/02/2021 | Coahuila        | Human | Male   | 79 | Hospitalized | Original | Nasopharyngeal and oropharyngeal swab |
| <a href="#">hCoV-19/Mexico/COA-INER-IMSS-00258/2021</a> | <a href="#">EPI_ISL_1279520</a> | 17/02/2021 | Coahuila        | Human | Female | 47 | Hospitalized | Original | Nasopharyngeal and oropharyngeal swab |
| <a href="#">hCoV-19/Mexico/TAM-INER-IMSS-00268/2021</a> | <a href="#">EPI_ISL_1279527</a> | 17/02/2021 | Tamaulipas      | Human | Female | 44 | Ambulatory   | Original | Nasopharyngeal and oropharyngeal swab |
| <a href="#">hCoV-19/Mexico/DUR-INER-IMSS-00274/2021</a> | <a href="#">EPI_ISL_1279532</a> | 17/02/2021 | Durango         | Human | Female | 62 | Hospitalized | Original | Nasopharyngeal and oropharyngeal swab |
| <a href="#">hCoV-19/Mexico/TAM-INER-IMSS-00276/2021</a> | <a href="#">EPI_ISL_1279534</a> | 17/02/2021 | Tamaulipas      | Human | Female | 49 | Hospitalized | Original | Nasopharyngeal and oropharyngeal swab |
| <a href="#">hCoV-19/Mexico/VER-INER-IMSS-00286/2021</a> | <a href="#">EPI_ISL_1279541</a> | 17/02/2021 | Veracruz        | Human | Male   | 35 | Ambulatory   | Original | Nasopharyngeal and oropharyngeal swab |
| <a href="#">hCoV-19/Mexico/ZAC-INER-IMSS-00088/2021</a> | <a href="#">EPI_ISL_1279301</a> | 17/02/2021 | Zacatecas       | Human | Female | 53 | Ambulatory   | Original | Nasopharyngeal and oropharyngeal swab |
| <a href="#">hCoV-19/Mexico/SLP-INER-IMSS-00162/2021</a> | <a href="#">EPI_ISL_1279286</a> | 18/02/2021 | San Luis Potosi | Human | Male   | 53 | Hospitalized | Original | Nasopharyngeal and oropharyngeal swab |
| <a href="#">hCoV-19/Mexico/VER-INER-IMSS-00357/2021</a> | <a href="#">EPI_ISL_1279602</a> | 18/02/2021 | Veracruz        | Human | Male   | 76 | Hospitalized | Original | Nasopharyngeal and oropharyngeal swab |
| <a href="#">hCoV-19/Mexico/VER-INER-IMSS-00358/2021</a> | <a href="#">EPI_ISL_1279603</a> | 18/02/2021 | Veracruz        | Human | Male   | 82 | Hospitalized | Original | Nasopharyngeal and oropharyngeal swab |
| <a href="#">hCoV-19/Mexico/ZAC-INER-IMSS-00089/2021</a> | <a href="#">EPI_ISL_1279374</a> | 18/02/2021 | Zacatecas       | Human | Male   | 26 | Ambulatory   | Original | Nasopharyngeal and oropharyngeal swab |
| <a href="#">hCoV-19/Mexico/ZAC-INER-IMSS-00090/2021</a> | <a href="#">EPI_ISL_1279375</a> | 18/02/2021 | Zacatecas       | Human | Female | 40 | Ambulatory   | Original | Nasopharyngeal and oropharyngeal swab |



|                                          |                 |            |                 |       |        |    |              |          |                                       |
|------------------------------------------|-----------------|------------|-----------------|-------|--------|----|--------------|----------|---------------------------------------|
| hCoV-19/Mexico/ZAC-INER-IMSS-00091/2021  | EPI_ISL_1279376 | 18/02/2021 | Zacatecas       | Human | Female | 83 | Hospitalized | Original | Nasopharyngeal and oropharyngeal swab |
| hCoV-19/Mexico/ZAC-INER-IMSS-00092/2021  | EPI_ISL_1279377 | 18/02/2021 | Zacatecas       | Human | Female | 42 | Ambulatory   | Original | Nasopharyngeal and oropharyngeal swab |
| hCoV-19/Mexico/ZAC-INER-IMSS-00093/2021  | EPI_ISL_1279378 | 18/02/2021 | Zacatecas       | Human | Male   | 40 | Ambulatory   | Original | Nasopharyngeal and oropharyngeal swab |
| hCoV-19/Mexico/ZAC-INER-IMSS-00094/2021  | EPI_ISL_1279379 | 18/02/2021 | Zacatecas       | Human | Female | 73 | Ambulatory   | Original | Nasopharyngeal and oropharyngeal swab |
| hCoV-19/Mexico/ZAC-INER-IMSS-00095/2021  | EPI_ISL_1279380 | 18/02/2021 | Zacatecas       | Human | Female | 46 | Ambulatory   | Original | Nasopharyngeal and oropharyngeal swab |
| hCoV-19/Mexico/ZAC-INER-IMSS-00096/2021  | EPI_ISL_1279381 | 18/02/2021 | Zacatecas       | Human | Male   | 54 | Ambulatory   | Original | Nasopharyngeal and oropharyngeal swab |
| hCoV-19/Mexico/PUE-INER-IMSS-00122/2021  | EPI_ISL_1279404 | 18/02/2021 | Puebla          | Human | Male   | 22 | Ambulatory   | Original | Nasopharyngeal and oropharyngeal swab |
| hCoV-19/Mexico/PUE-INER-IMSS-00123/2021  | EPI_ISL_1279405 | 18/02/2021 | Puebla          | Human | Male   | 27 | Ambulatory   | Original | Nasopharyngeal and oropharyngeal swab |
| hCoV-19/Mexico/PUE-INER-IMSS-00124/2021  | EPI_ISL_1279406 | 18/02/2021 | Puebla          | Human | Female | 44 | Ambulatory   | Original | Nasopharyngeal and oropharyngeal swab |
| hCoV-19/Mexico/PUE-INER-IMSS-00145/2021  | EPI_ISL_1279424 | 18/02/2021 | Puebla          | Human | Female | 30 | Ambulatory   | Original | Nasopharyngeal swab                   |
| hCoV-19/Mexico/PUE-INER-IMSS-00146/2021  | EPI_ISL_1279425 | 18/02/2021 | Puebla          | Human | Male   | 33 | Ambulatory   | Original | Nasopharyngeal swab                   |
| hCoV-19/Mexico/PUE-INER-IMSS-00147/2021  | EPI_ISL_1279426 | 18/02/2021 | Puebla          | Human | Female | 48 | Ambulatory   | Original | Nasopharyngeal swab                   |
| hCoV-19/Mexico/PUE-INER-IMSS-00152/2021  | EPI_ISL_1279430 | 18/02/2021 | Puebla          | Human | Male   | 32 | Ambulatory   | Original | Nasopharyngeal and oropharyngeal swab |
| hCoV-19/Mexico/SLP-INER-IMSS-00163/2021  | EPI_ISL_1279439 | 18/02/2021 | San Luis Potosi | Human | Male   | 49 | Hospitalized | Original | Nasopharyngeal and oropharyngeal swab |
| hCoV-19/Mexico/TAM-INER-IMSS-00259/2021  | EPI_ISL_1279521 | 18/02/2021 | Tamaulipas      | Human | Male   | 27 | Hospitalized | Original | Nasopharyngeal and oropharyngeal swab |
| hCoV-19/Mexico/NLE-INER-IMSS-00264/2021  | EPI_ISL_1279524 | 18/02/2021 | Nuevo Leon      | Human | Male   | 72 | Ambulatory   | Original | Nasopharyngeal and oropharyngeal swab |
| hCoV-19/Mexico/DUR-INER-IMSS-00270/2021  | EPI_ISL_1279529 | 18/02/2021 | Durango         | Human | Male   | 52 | Ambulatory   | Original | Nasopharyngeal and oropharyngeal swab |
| hCoV-19/Mexico/MOR-INER-IMSS-00307/2021  | EPI_ISL_1279560 | 18/02/2021 | Morelos         | Human | Male   | 44 | Hospitalized | Original | Nasopharyngeal and oropharyngeal swab |
| hCoV-19/Mexico/QUE-INER-IMSS-00112/2021  | EPI_ISL_1279263 | 19/02/2021 | Queretaro       | Human | Male   | 55 | Ambulatory   | Original | Nasopharyngeal and oropharyngeal swab |
| hCoV-19/Mexico/PUE-INER-IMSS-00155/2021  | EPI_ISL_1279274 | 19/02/2021 | Puebla          | Human | Male   | 33 | Ambulatory   | Original | Nasopharyngeal and oropharyngeal swab |
| hCoV-19/Mexico/NLE-INER-IMSS-00266/2021  | EPI_ISL_1279275 | 19/02/2021 | Nuevo Leon      | Human | Female | 69 | Hospitalized | Original | Nasopharyngeal swab                   |
| hCoV-19/Mexico/NLE-INER-IMSS-00263/2021  | EPI_ISL_1279284 | 19/02/2021 | Nuevo Leon      | Human | Female | 55 | Hospitalized | Original | Nasopharyngeal and oropharyngeal swab |
| hCoV-19/Mexico/VER-INER-IMSS-00292/2021  | EPI_ISL_1279288 | 19/02/2021 | Veracruz        | Human | Male   | 55 | Hospitalized | Original | Nasopharyngeal and oropharyngeal swab |
| hCoV-19/Mexico/PUE-INER-IMSS-00135/2021  | EPI_ISL_1279289 | 19/02/2021 | Puebla          | Human | Male   | 34 | Ambulatory   | Original | Nasopharyngeal and oropharyngeal swab |
| hCoV-19/Mexico/PUE-INER-IMSS-00148/2021  | EPI_ISL_1287770 | 19/02/2021 | Puebla          | Human | Male   | 44 | Ambulatory   | Original | Nasopharyngeal swab                   |
| hCoV-19/Mexico/VER-INER-IMSS-00289/2021  | EPI_ISL_1287776 | 19/02/2021 | Veracruz        | Human | Male   | 46 | Ambulatory   | Original | Nasopharyngeal and oropharyngeal swab |
| hCoV-19/Mexico/TAM_LANGEBIO_IMSS_0024/20 | EPI_ISL_1351468 | 19/02/2021 | Yucatan         | Human | Male   | 45 | Ambulatory   | Original | Pharyngeal and Nasopharyngeal swab    |
| hCoV-19/Mexico/PUE-INER-IMSS-00126/2021  | EPI_ISL_1279407 | 19/02/2021 | Puebla          | Human | Female | 48 | Ambulatory   | Original | Nasopharyngeal and oropharyngeal swab |
| hCoV-19/Mexico/PUE-INER-IMSS-00130/2021  | EPI_ISL_1279411 | 19/02/2021 | Puebla          | Human | Female | 52 | Ambulatory   | Original | Nasopharyngeal and oropharyngeal swab |
| hCoV-19/Mexico/PUE-INER-IMSS-00131/2021  | EPI_ISL_1279412 | 19/02/2021 | Puebla          | Human | Female | 15 | Ambulatory   | Original | Nasopharyngeal and oropharyngeal swab |
| hCoV-19/Mexico/PUE-INER-IMSS-00132/2021  | EPI_ISL_1279413 | 19/02/2021 | Puebla          | Human | Male   | 54 | Ambulatory   | Original | Nasopharyngeal and oropharyngeal swab |
| hCoV-19/Mexico/PUE-INER-IMSS-00153/2021  | EPI_ISL_1279431 | 19/02/2021 | Puebla          | Human | Male   | 43 | Ambulatory   | Original | Nasopharyngeal and oropharyngeal swab |
| hCoV-19/Mexico/PUE-INER-IMSS-00154/2021  | EPI_ISL_1279432 | 19/02/2021 | Puebla          | Human | Male   | 47 | Ambulatory   | Original | Nasopharyngeal and oropharyngeal swab |
| hCoV-19/Mexico/VER-INER-IMSS-00176/2021  | EPI_ISL_1279450 | 19/02/2021 | Veracruz        | Human | Male   | 68 | Hospitalized | Original | Nasopharyngeal and oropharyngeal swab |
| hCoV-19/Mexico/AGU-INER-IMSS-00190/2021  | EPI_ISL_1279461 | 19/02/2021 | Aguascalientes  | Human | Female | 36 | Ambulatory   | Original | Nasopharyngeal and oropharyngeal swab |
| hCoV-19/Mexico/NLE-INER-IMSS-00265/2021  | EPI_ISL_1279525 | 19/02/2021 | Nuevo Leon      | Human | Female | 57 | Hospitalized | Original | Nasopharyngeal and oropharyngeal swab |
| hCoV-19/Mexico/NLE-INER-IMSS-00267/2021  | EPI_ISL_1279526 | 19/02/2021 | Nuevo Leon      | Human | Male   | 70 | Ambulatory   | Original | Nasopharyngeal and oropharyngeal swab |
| hCoV-19/Mexico/DUR-INER-IMSS-00271/2021  | EPI_ISL_1279530 | 19/02/2021 | Durango         | Human | Male   | 59 | Ambulatory   | Original | Nasopharyngeal and oropharyngeal swab |
| hCoV-19/Mexico/PUE-INER-IMSS-00282/2021  | EPI_ISL_1279538 | 19/02/2021 | Puebla          | Human | Female | 21 | Ambulatory   | Original | Nasopharyngeal and oropharyngeal swab |
| hCoV-19/Mexico/VER-INER-IMSS-00287/2021  | EPI_ISL_1279542 | 19/02/2021 | Veracruz        | Human | Male   | 28 | Ambulatory   | Original | Nasopharyngeal and oropharyngeal swab |
| hCoV-19/Mexico/VER-INER-IMSS-00288/2021  | EPI_ISL_1279543 | 19/02/2021 | Veracruz        | Human | Male   | 40 | Ambulatory   | Original | Nasopharyngeal and oropharyngeal swab |

|                                            |                 |            |                 |       |        |    |              |          |                                       |
|--------------------------------------------|-----------------|------------|-----------------|-------|--------|----|--------------|----------|---------------------------------------|
| hCoV-19/Mexico/VER-INER-IMSS-00290/2021    | EPI_ISL_1279544 | 19/02/2021 | Veracruz        | Human | Male   | 22 | Ambulatory   | Original | Nasopharyngeal and oropharyngeal swab |
| hCoV-19/Mexico/VER-INER-IMSS-00291/2021    | EPI_ISL_1279545 | 19/02/2021 | Veracruz        | Human | Male   | 38 | Ambulatory   | Original | Nasopharyngeal and oropharyngeal swab |
| hCoV-19/Mexico/VER-INER-IMSS-00299/2021    | EPI_ISL_1279552 | 19/02/2021 | Veracruz        | Human | Female | 33 | Ambulatory   | Original | Nasopharyngeal and oropharyngeal swab |
| hCoV-19/Mexico/VER-INER-IMSS-00300/2021    | EPI_ISL_1279553 | 19/02/2021 | Veracruz        | Human | Female | 49 | Ambulatory   | Original | Nasopharyngeal and oropharyngeal swab |
| hCoV-19/Mexico/VER-INER-IMSS-00301/2021    | EPI_ISL_1279554 | 19/02/2021 | Veracruz        | Human | Male   | 69 | Hospitalized | Original | Nasopharyngeal and oropharyngeal swab |
| hCoV-19/Mexico/VER-INER-IMSS-00302/2021    | EPI_ISL_1279555 | 19/02/2021 | Veracruz        | Human | Male   | 31 | Hospitalized | Original | Nasopharyngeal and oropharyngeal swab |
| hCoV-19/Mexico/VER-INER-IMSS-00303/2021    | EPI_ISL_1279556 | 19/02/2021 | Veracruz        | Human | Female | 45 | Ambulatory   | Original | Nasopharyngeal and oropharyngeal swab |
| hCoV-19/Mexico/VER-INER-IMSS-00311/2021    | EPI_ISL_1279564 | 19/02/2021 | Veracruz        | Human | Female | 37 | Ambulatory   | Original | Nasopharyngeal and oropharyngeal swab |
| hCoV-19/Mexico/VER-INER-IMSS-00353/2021    | EPI_ISL_1279599 | 19/02/2021 | Veracruz        | Human | Male   | 15 | Ambulatory   | Original | Nasopharyngeal and oropharyngeal swab |
| hCoV-19/Mexico/PUE_INER_IMSS_00678/2021    | EPI_ISL_2091134 | 19/02/2021 | Puebla          | Human | Male   | 38 | Ambulatory   | Original | Nasopharyngeal and oropharyngeal swab |
| hCoV-19/Mexico/PUE-INER-IMSS-00120/2021    | EPI_ISL_1279268 | 20/02/2021 | Puebla          | Human | Male   | 64 | Hospitalized | Original | Nasopharyngeal and oropharyngeal swab |
| hCoV-19/Mexico/SLP-INER-IMSS-00170/2021    | EPI_ISL_1279269 | 20/02/2021 | San Luis Potosi | Human | Male   | 48 | Hospitalized | Original | Nasopharyngeal and oropharyngeal swab |
| hCoV-19/Mexico/VER-INER-IMSS-00354/2021    | EPI_ISL_1279293 | 20/02/2021 | Veracruz        | Human | Male   | 24 | Ambulatory   | Original | Pharyngeal swab                       |
| hCoV-19/Mexico/PUE-INER-IMSS-00137/2021    | EPI_ISL_1287769 | 20/02/2021 | Puebla          | Human | Male   | 26 | Ambulatory   | Original | Nasopharyngeal and oropharyngeal swab |
| hCoV-19/Mexico/TAM_LANGEBIO_IMSS_0001/2021 | EPI_ISL_1351416 | 20/02/2021 | Tamaulipas      | Human | Female | 90 | Hospitalized | Original | Pharyngeal and Nasopharyngeal swab    |
| hCoV-19/Mexico/ZAC-INER-IMSS-00097/2021    | EPI_ISL_1279382 | 20/02/2021 | Zacatecas       | Human | Male   | 40 | Ambulatory   | Original | Nasopharyngeal and oropharyngeal swab |
| hCoV-19/Mexico/QUE-INER-IMSS-00105/2021    | EPI_ISL_1279389 | 20/02/2021 | Queretaro       | Human | Female | 63 | Hospitalized | Original | Nasopharyngeal and oropharyngeal swab |
| hCoV-19/Mexico/QUE-INER-IMSS-00108/2021    | EPI_ISL_1279392 | 20/02/2021 | Queretaro       | Human | Female | 67 | Hospitalized | Original | Nasopharyngeal and oropharyngeal swab |
| hCoV-19/Mexico/QUE-INER-IMSS-00109/2021    | EPI_ISL_1279393 | 20/02/2021 | Queretaro       | Human | Female | 48 | Hospitalized | Original | Nasopharyngeal and oropharyngeal swab |
| hCoV-19/Mexico/PUE-INER-IMSS-00117/2021    | EPI_ISL_1279400 | 20/02/2021 | Puebla          | Human | Male   | 77 | Hospitalized | Original | Nasopharyngeal and oropharyngeal swab |
| hCoV-19/Mexico/PUE-INER-IMSS-00118/2021    | EPI_ISL_1279401 | 20/02/2021 | Puebla          | Human | Male   | 61 | Hospitalized | Original | Nasopharyngeal and oropharyngeal swab |
| hCoV-19/Mexico/PUE-INER-IMSS-00119/2021    | EPI_ISL_1279402 | 20/02/2021 | Puebla          | Human | Male   | 50 | Hospitalized | Original | Nasopharyngeal and oropharyngeal swab |
| hCoV-19/Mexico/PUE-INER-IMSS-00127/2021    | EPI_ISL_1279408 | 20/02/2021 | Puebla          | Human | Female | 72 | Ambulatory   | Original | Nasopharyngeal and oropharyngeal swab |
| hCoV-19/Mexico/PUE-INER-IMSS-00128/2021    | EPI_ISL_1279409 | 20/02/2021 | Puebla          | Human | Male   | 15 | Ambulatory   | Original | Nasopharyngeal and oropharyngeal swab |
| hCoV-19/Mexico/PUE-INER-IMSS-00133/2021    | EPI_ISL_1279414 | 20/02/2021 | Puebla          | Human | Male   | 57 | Ambulatory   | Original | Nasopharyngeal and oropharyngeal swab |
| hCoV-19/Mexico/PUE-INER-IMSS-00134/2021    | EPI_ISL_1279415 | 20/02/2021 | Puebla          | Human | Female | 23 | Ambulatory   | Original | Nasopharyngeal and oropharyngeal swab |
| hCoV-19/Mexico/PUE-INER-IMSS-00136/2021    | EPI_ISL_1279416 | 20/02/2021 | Puebla          | Human | Male   | 46 | Ambulatory   | Original | Nasopharyngeal and oropharyngeal swab |
| hCoV-19/Mexico/PUE-INER-IMSS-00138/2021    | EPI_ISL_1279417 | 20/02/2021 | Puebla          | Human | Male   | 48 | Ambulatory   | Original | Nasopharyngeal and oropharyngeal swab |
| hCoV-19/Mexico/PUE-INER-IMSS-00139/2021    | EPI_ISL_1279418 | 20/02/2021 | Puebla          | Human | Male   | 32 | Ambulatory   | Original | Nasopharyngeal and oropharyngeal swab |
| hCoV-19/Mexico/PUE-INER-IMSS-00150/2021    | EPI_ISL_1279428 | 20/02/2021 | Puebla          | Human | Male   | 44 | Ambulatory   | Original | Nasopharyngeal swab                   |
| hCoV-19/Mexico/PUE-INER-IMSS-00151/2021    | EPI_ISL_1279429 | 20/02/2021 | Puebla          | Human | Female | 39 | Ambulatory   | Original | Nasopharyngeal swab                   |
| hCoV-19/Mexico/PUE-INER-IMSS-00156/2021    | EPI_ISL_1279433 | 20/02/2021 | Puebla          | Human | Male   | 50 | Ambulatory   | Original | Nasopharyngeal swab                   |
| hCoV-19/Mexico/PUE-INER-IMSS-00157/2021    | EPI_ISL_1279434 | 20/02/2021 | Puebla          | Human | Male   | 80 | Ambulatory   | Original | Nasopharyngeal swab                   |
| hCoV-19/Mexico/PUE-INER-IMSS-00158/2021    | EPI_ISL_1279435 | 20/02/2021 | Puebla          | Human | Female | 27 | Ambulatory   | Original | Nasopharyngeal swab                   |
| hCoV-19/Mexico/PUE-INER-IMSS-00159/2021    | EPI_ISL_1279436 | 20/02/2021 | Puebla          | Human | Male   | 35 | Ambulatory   | Original | Nasopharyngeal swab                   |
| hCoV-19/Mexico/PUE-INER-IMSS-00160/2021    | EPI_ISL_1279437 | 20/02/2021 | Puebla          | Human | Male   | 38 | Ambulatory   | Original | Nasopharyngeal swab                   |
| hCoV-19/Mexico/PUE-INER-IMSS-00161/2021    | EPI_ISL_1279438 | 20/02/2021 | Puebla          | Human | Male   | 41 | Ambulatory   | Original | Nasopharyngeal swab                   |
| hCoV-19/Mexico/SLP-INER-IMSS-00171/2021    | EPI_ISL_1279445 | 20/02/2021 | San Luis Potosi | Human | Male   | 78 | Hospitalized | Original | Nasopharyngeal and oropharyngeal swab |
| hCoV-19/Mexico/SLP-INER-IMSS-00172/2021    | EPI_ISL_1279446 | 20/02/2021 | San Luis Potosi | Human | Male   | 65 | Hospitalized | Original | Nasopharyngeal and oropharyngeal swab |
| hCoV-19/Mexico/SLP-INER-IMSS-00173/2021    | EPI_ISL_1279447 | 20/02/2021 | San Luis Potosi | Human | Female | 53 | Hospitalized | Original | Nasopharyngeal and oropharyngeal swab |
| hCoV-19/Mexico/OAX-INER-IMSS-00182/2021    | EPI_ISL_1279453 | 20/02/2021 | Oaxaca          | Human | Male   | 57 | Hospitalized | Original | Nasopharyngeal and oropharyngeal swab |

|                                          |                 |            |                 |       |        |    |              |          |                                       |
|------------------------------------------|-----------------|------------|-----------------|-------|--------|----|--------------|----------|---------------------------------------|
| hCoV-19/Mexico/OAX-INER-IMSS-00183/2021  | EPI_ISL_1279454 | 20/02/2021 | Oaxaca          | Human | Female | 51 | Ambulatory   | Original | Nasopharyngeal and oropharyngeal swab |
| hCoV-19/Mexico/GRO-INER-IMSS-00280/2021  | EPI_ISL_1279537 | 20/02/2021 | Guerrero        | Human | Female | 81 | Hospitalized | Original | Nasopharyngeal and oropharyngeal swab |
| hCoV-19/Mexico/VER-INER-IMSS-00293/2021  | EPI_ISL_1279546 | 20/02/2021 | Veracruz        | Human | Male   | 61 | Hospitalized | Original | Nasopharyngeal and oropharyngeal swab |
| hCoV-19/Mexico/VER-INER-IMSS-00294/2021  | EPI_ISL_1279547 | 20/02/2021 | Veracruz        | Human | Female | 92 | Hospitalized | Original | Nasopharyngeal and oropharyngeal swab |
| hCoV-19/Mexico/GRO-INER-IMSS-00304/2021  | EPI_ISL_1279557 | 20/02/2021 | Guerrero        | Human | Male   | 47 | Ambulatory   | Original | Nasopharyngeal and oropharyngeal swab |
| hCoV-19/Mexico/PUE-INER-IMSS-00115/2021  | EPI_ISL_1279398 | 20/02/2021 | Puebla          | Human | Female | 85 | Hospitalized | Original | Nasopharyngeal and oropharyngeal swab |
| hCoV-19/Mexico/PUE-INER-IMSS-00116/2021  | EPI_ISL_1279399 | 20/02/2021 | Puebla          | Human | Female | 60 | Hospitalized | Original | Nasopharyngeal and oropharyngeal swab |
| hCoV-19/Mexico/SLP-INER-IMSS-00169/2021  | EPI_ISL_1279283 | 21/02/2021 | San Luis Potosi | Human | Male   | 84 | Hospitalized | Original | Nasopharyngeal and oropharyngeal swab |
| hCoV-19/Mexico/GRO-INER-IMSS-00281/2021  | EPI_ISL_1287774 | 21/02/2021 | Guerrero        | Human | Male   | 91 | Hospitalized | Original | Pharyngeal swab                       |
| hCoV-19/Mexico/TAM_LANGEBIO_IMSS_0023/20 | EPI_ISL_1351465 | 21/02/2021 | Yucatan         | Human | Male   | 75 | Hospitalized | Original | Pharyngeal and Nasopharyngeal swab    |
| hCoV-19/Mexico/TAM_LANGEBIO_IMSS_0026/20 | EPI_ISL_1351474 | 21/02/2021 | Quintana Roo    | Human | Male   | 55 | Hospitalized | Original | Pharyngeal and Nasopharyngeal swab    |
| hCoV-19/Mexico/TAM_LANGEBIO_IMSS_0027/20 | EPI_ISL_1351477 | 21/02/2021 | Quintana Roo    | Human | Female | 66 | Hospitalized | Original | Pharyngeal and Nasopharyngeal swab    |
| hCoV-19/Mexico/TAM_LANGEBIO_IMSS_0029/20 | EPI_ISL_1351483 | 21/02/2021 | Quintana Roo    | Human | Female | 39 | Hospitalized | Original | Pharyngeal and Nasopharyngeal swab    |
| hCoV-19/Mexico/QUE-INER-IMSS-00110/2021  | EPI_ISL_1279394 | 21/02/2021 | Queretaro       | Human | Male   | 97 | Hospitalized | Original | Nasopharyngeal and oropharyngeal swab |
| hCoV-19/Mexico/PUE-INER-IMSS-00129/2021  | EPI_ISL_1279410 | 21/02/2021 | Puebla          | Human | Male   | 36 | Ambulatory   | Original | Nasopharyngeal and oropharyngeal swab |
| hCoV-19/Mexico/OAX-INER-IMSS-00165/2021  | EPI_ISL_1279441 | 21/02/2021 | Oaxaca          | Human | Male   | 48 | Hospitalized | Original | Nasopharyngeal and oropharyngeal swab |
| hCoV-19/Mexico/OAX-INER-IMSS-00166/2021  | EPI_ISL_1279442 | 21/02/2021 | Oaxaca          | Human | Female | 23 | Ambulatory   | Original | Nasopharyngeal and oropharyngeal swab |
| hCoV-19/Mexico/OAX-INER-IMSS-00167/2021  | EPI_ISL_1279443 | 21/02/2021 | Oaxaca          | Human | Male   | 28 | Hospitalized | Original | Nasopharyngeal and oropharyngeal swab |
| hCoV-19/Mexico/SLP-INER-IMSS-00168/2021  | EPI_ISL_1279444 | 21/02/2021 | San Luis Potosi | Human | Female | 50 | Hospitalized | Original | Nasopharyngeal and oropharyngeal swab |
| hCoV-19/Mexico/VER-INER-IMSS-00295/2021  | EPI_ISL_1279548 | 21/02/2021 | Veracruz        | Human | Male   | 83 | Hospitalized | Original | Nasopharyngeal and oropharyngeal swab |
| hCoV-19/Mexico/VER-INER-IMSS-00296/2021  | EPI_ISL_1279549 | 21/02/2021 | Veracruz        | Human | Male   | 86 | Hospitalized | Original | Nasopharyngeal and oropharyngeal swab |
| hCoV-19/Mexico/VER-INER-IMSS-00297/2021  | EPI_ISL_1279550 | 21/02/2021 | Veracruz        | Human | Male   | 61 | Hospitalized | Original | Nasopharyngeal and oropharyngeal swab |
| hCoV-19/Mexico/VER-INER-IMSS-00298/2021  | EPI_ISL_1279551 | 21/02/2021 | Veracruz        | Human | Male   | 40 | Hospitalized | Original | Nasopharyngeal and oropharyngeal swab |
| hCoV-19/Mexico/MOR-INER-IMSS-00305/2021  | EPI_ISL_1279558 | 21/02/2021 | Morelos         | Human | Male   | 83 | Hospitalized | Original | Nasopharyngeal and oropharyngeal swab |
| hCoV-19/Mexico/QUE-INER-IMSS-00111/2021  | EPI_ISL_1279395 | 21/02/2021 | Queretaro       | Human | Female | 53 | Hospitalized | Original | Nasopharyngeal and oropharyngeal swab |
| hCoV-19/Mexico/VER-INER-IMSS-00318/2021  | EPI_ISL_1279277 | 22/02/2021 | Veracruz        | Human | Female | 71 | Hospitalized | Original | Nasopharyngeal and oropharyngeal swab |
| hCoV-19/Mexico/VER-INER-IMSS-00319/2021  | EPI_ISL_1279278 | 22/02/2021 | Veracruz        | Human | Male   | 53 | Hospitalized | Original | Nasopharyngeal and oropharyngeal swab |
| hCoV-19/Mexico/CMX-INER-IMSS-00179/2021  | EPI_ISL_1279290 | 22/02/2021 | Mexico City     | Human | Female | 54 | Hospitalized | Original | Pharyngeal swab                       |
| hCoV-19/Mexico/CMX-INER-IMSS-00180/2021  | EPI_ISL_1279291 | 22/02/2021 | Mexico City     | Human | Male   | 81 | Hospitalized | Original | Pharyngeal swab                       |
| hCoV-19/Mexico/CMX-INER-IMSS-00181/2021  | EPI_ISL_1279292 | 22/02/2021 | Mexico City     | Human | Male   | 77 | Hospitalized | Original | Pharyngeal swab                       |
| hCoV-19/Mexico/VER-INER-IMSS-00313/2021  | EPI_ISL_1279296 | 22/02/2021 | Veracruz        | Human | Male   | 71 | Hospitalized | Original | Nasopharyngeal and oropharyngeal swab |
| hCoV-19/Mexico/MEX-INER-IMSS-00324/2021  | EPI_ISL_1279297 | 22/02/2021 | State of Mexico | Human | Female | 85 | Hospitalized | Original | Nasopharyngeal and oropharyngeal swab |
| hCoV-19/Mexico/TLA-INER-IMSS-00283/2021  | EPI_ISL_1287775 | 22/02/2021 | Tlaxcala        | Human | Male   | 63 | Hospitalized | Original | Nasopharyngeal and oropharyngeal swab |
| hCoV-19/Mexico/TAM_LANGEBIO_IMSS_0002/20 | EPI_ISL_1351418 | 22/02/2021 | Nuevo Leon      | Human | Female | 41 | Ambulatory   | Original | Pharyngeal and Nasopharyngeal swab    |
| hCoV-19/Mexico/TAM_LANGEBIO_IMSS_0003/20 | EPI_ISL_1351420 | 22/02/2021 | Nuevo Leon      | Human | Female | 42 | Ambulatory   | Original | Pharyngeal and Nasopharyngeal swab    |
| hCoV-19/Mexico/TAM_LANGEBIO_IMSS_0004/20 | EPI_ISL_1351422 | 22/02/2021 | Nuevo Leon      | Human | Male   | 54 | Hospitalized | Original | Pharyngeal and Nasopharyngeal swab    |
| hCoV-19/Mexico/TAM_LANGEBIO_IMSS_0006/20 | EPI_ISL_1351424 | 22/02/2021 | Nuevo Leon      | Human | Male   | 19 | Ambulatory   | Original | Pharyngeal and Nasopharyngeal swab    |
| hCoV-19/Mexico/TAM_LANGEBIO_IMSS_0008/20 | EPI_ISL_1351428 | 22/02/2021 | Coahuila        | Human | Female | 28 | Ambulatory   | Original | Pharyngeal and Nasopharyngeal swab    |
| hCoV-19/Mexico/TAM_LANGEBIO_IMSS_0031/20 | EPI_ISL_1351489 | 22/02/2021 | Quintana Roo    | Human | Female | 36 | Ambulatory   | Original | Pharyngeal and Nasopharyngeal swab    |
| hCoV-19/Mexico/TAM_LANGEBIO_IMSS_0033/20 | EPI_ISL_1351494 | 22/02/2021 | Tabasco         | Human | Female | 37 | Ambulatory   | Original | Pharyngeal and Nasopharyngeal swab    |
| hCoV-19/Mexico/TAM_LANGEBIO_IMSS_0034/20 | EPI_ISL_1351498 | 22/02/2021 | Tabasco         | Human | Male   | 33 | Ambulatory   | Original | Pharyngeal and Nasopharyngeal swab    |

|                                          |                 |            |                     |       |        |    |              |          |                                       |
|------------------------------------------|-----------------|------------|---------------------|-------|--------|----|--------------|----------|---------------------------------------|
| hCoV-19/Mexico/BCS_INER-IMSS_00482/2021  | EPI_ISL_1595603 | 22/02/2021 | Baja California Sur | Human | Female | 72 | Hospitalized | Original | Nasopharyngeal and oropharyngeal swab |
| hCoV-19/Mexico/MEX-INER-IMSS-00098/2021  | EPI_ISL_1279383 | 22/02/2021 | State of Mexico     | Human | Male   | 61 | Ambulatory   | Original | Nasopharyngeal and oropharyngeal swab |
| hCoV-19/Mexico/MEX-INER-IMSS-00100/2021  | EPI_ISL_1279384 | 22/02/2021 | State of Mexico     | Human | Male   | 77 | Hospitalized | Original | Pharyngeal swab                       |
| hCoV-19/Mexico/MEX-INER-IMSS-00101/2021  | EPI_ISL_1279385 | 22/02/2021 | State of Mexico     | Human | Male   | 24 | Ambulatory   | Original | Nasopharyngeal and oropharyngeal swab |
| hCoV-19/Mexico/CMX-INER-IMSS-00102/2021  | EPI_ISL_1279386 | 22/02/2021 | Mexico City         | Human | Female | 49 | Ambulatory   | Original | Pharyngeal swab                       |
| hCoV-19/Mexico/MEX-INER-IMSS-00103/2021  | EPI_ISL_1279387 | 22/02/2021 | State of Mexico     | Human | Female | 31 | Hospitalized | Original | Nasopharyngeal and oropharyngeal swab |
| hCoV-19/Mexico/MEX-INER-IMSS-00104/2021  | EPI_ISL_1279388 | 22/02/2021 | State of Mexico     | Human | Male   | 66 | Hospitalized | Original | Nasopharyngeal and oropharyngeal swab |
| hCoV-19/Mexico/MEX-INER-IMSS-00106/2021  | EPI_ISL_1279390 | 22/02/2021 | State of Mexico     | Human | Female | 64 | Hospitalized | Original | Nasopharyngeal and oropharyngeal swab |
| hCoV-19/Mexico/MEX-INER-IMSS-00107/2021  | EPI_ISL_1279391 | 22/02/2021 | State of Mexico     | Human | Female | 56 | Hospitalized | Original | Nasopharyngeal and oropharyngeal swab |
| hCoV-19/Mexico/MOR-INER-IMSS-00177/2021  | EPI_ISL_1279451 | 22/02/2021 | Morelos             | Human | Male   | 76 | Hospitalized | Original | Nasopharyngeal and oropharyngeal swab |
| hCoV-19/Mexico/CMX-INER-IMSS-00178/2021  | EPI_ISL_1279452 | 22/02/2021 | Mexico City         | Human | Female | 33 | Hospitalized | Original | Pharyngeal swab                       |
| hCoV-19/Mexico/TLA-INER-IMSS-00284/2021  | EPI_ISL_1279539 | 22/02/2021 | Tlaxcala            | Human | Male   | 62 | Hospitalized | Original | Nasopharyngeal and oropharyngeal swab |
| hCoV-19/Mexico/MEX-INER-IMSS-00306/2021  | EPI_ISL_1279559 | 22/02/2021 | State of Mexico     | Human | Female | 34 | Hospitalized | Original | Nasopharyngeal and oropharyngeal swab |
| hCoV-19/Mexico/MEX-INER-IMSS-00308/2021  | EPI_ISL_1279561 | 22/02/2021 | State of Mexico     | Human | Female | 82 | Ambulatory   | Original | Nasopharyngeal and oropharyngeal swab |
| hCoV-19/Mexico/MEX-INER-IMSS-00309/2021  | EPI_ISL_1279562 | 22/02/2021 | State of Mexico     | Human | Female | 63 | Hospitalized | Original | Nasopharyngeal and oropharyngeal swab |
| hCoV-19/Mexico/MEX-INER-IMSS-00310/2021  | EPI_ISL_1279563 | 22/02/2021 | State of Mexico     | Human | Female | 70 | Hospitalized | Original | Nasopharyngeal and oropharyngeal swab |
| hCoV-19/Mexico/OAX-INER-IMSS-00312/2021  | EPI_ISL_1279565 | 22/02/2021 | Oaxaca              | Human | Female | 35 | Ambulatory   | Original | Nasopharyngeal and oropharyngeal swab |
| hCoV-19/Mexico/VER-INER-IMSS-00314/2021  | EPI_ISL_1279566 | 22/02/2021 | Veracruz            | Human | Female | 82 | Hospitalized | Original | Nasopharyngeal and oropharyngeal swab |
| hCoV-19/Mexico/VER-INER-IMSS-00315/2021  | EPI_ISL_1279567 | 22/02/2021 | Veracruz            | Human | Female | 74 | Hospitalized | Original | Nasopharyngeal and oropharyngeal swab |
| hCoV-19/Mexico/VER-INER-IMSS-00316/2021  | EPI_ISL_1279568 | 22/02/2021 | Veracruz            | Human | Male   | 55 | Hospitalized | Original | Nasopharyngeal and oropharyngeal swab |
| hCoV-19/Mexico/VER-INER-IMSS-00317/2021  | EPI_ISL_1279569 | 22/02/2021 | Veracruz            | Human | Female | 65 | Hospitalized | Original | Nasopharyngeal and oropharyngeal swab |
| hCoV-19/Mexico/MEX-INER-IMSS-00321/2021  | EPI_ISL_1279571 | 22/02/2021 | State of Mexico     | Human | Female | 59 | Ambulatory   | Original | Nasopharyngeal and oropharyngeal swab |
| hCoV-19/Mexico/HID-INER-IMSS-00330/2021  | EPI_ISL_1279578 | 22/02/2021 | Hidalgo             | Human | Female | 37 | Hospitalized | Original | Nasopharyngeal and oropharyngeal swab |
| hCoV-19/Mexico/HID-INER-IMSS-00332/2021  | EPI_ISL_1279580 | 22/02/2021 | Hidalgo             | Human | Male   | 94 | Hospitalized | Original | Nasopharyngeal and oropharyngeal swab |
| hCoV-19/Mexico/MOR-INER-IMSS-00333/2021  | EPI_ISL_1279581 | 22/02/2021 | Morelos             | Human | Male   | 67 | Ambulatory   | Original | Nasopharyngeal and oropharyngeal swab |
| hCoV-19/Mexico/CMX-INER-IMSS-00334/2021  | EPI_ISL_1279582 | 22/02/2021 | Mexico City         | Human | Female | 37 | Ambulatory   | Original | Nasopharyngeal and oropharyngeal swab |
| hCoV-19/Mexico/MEX-INER-IMSS-00335/2021  | EPI_ISL_1279583 | 22/02/2021 | State of Mexico     | Human | Male   | 25 | Ambulatory   | Original | Nasopharyngeal and oropharyngeal swab |
| hCoV-19/Mexico/OAX-INER-IMSS-00343/2021  | EPI_ISL_1279589 | 22/02/2021 | Oaxaca              | Human | Male   | 62 | Ambulatory   | Original | Nasopharyngeal and oropharyngeal swab |
| hCoV-19/Mexico/OAX-INER-IMSS-00344/2021  | EPI_ISL_1279590 | 22/02/2021 | Oaxaca              | Human | Female | 60 | Hospitalized | Original | Nasopharyngeal and oropharyngeal swab |
| hCoV-19/Mexico/VER-INER-IMSS-00345/2021  | EPI_ISL_1279591 | 22/02/2021 | Veracruz            | Human | Male   | 78 | Hospitalized | Original | Nasopharyngeal and oropharyngeal swab |
| hCoV-19/Mexico/VER-INER-IMSS-00347/2021  | EPI_ISL_1279593 | 22/02/2021 | Veracruz            | Human | Female | 59 | Hospitalized | Original | Nasopharyngeal and oropharyngeal swab |
| hCoV-19/Mexico/VER-INER-IMSS-00348/2021  | EPI_ISL_1279594 | 22/02/2021 | Veracruz            | Human | Male   | 43 | Hospitalized | Original | Nasopharyngeal and oropharyngeal swab |
| hCoV-19/Mexico/MEX-INER-IMSS-00113/2021  | EPI_ISL_1279396 | 22/02/2021 | State of Mexico     | Human | Male   | 50 | Hospitalized | Original | Nasopharyngeal and oropharyngeal swab |
| hCoV-19/Mexico/HID-INER-IMSS-00114/2021  | EPI_ISL_1279397 | 22/02/2021 | Hidalgo             | Human | Male   | 1  | Ambulatory   | Original | Nasopharyngeal swab                   |
| hCoV-19/Mexico/CMX_INER-IMSS_00677/2021  | EPI_ISL_2091133 | 22/02/2021 | Mexico City         | Human | Male   | 17 | Ambulatory   | Original | Oropharyngeal swab                    |
| hCoV-19/Mexico/SLP-INER-IMSS-00337/2021  | EPI_ISL_1279299 | 23/02/2021 | San Luis Potosi     | Human | Female | 73 | Hospitalized | Original | Nasopharyngeal and oropharyngeal swab |
| hCoV-19/Mexico/MEX-INER-IMSS-00328/2021  | EPI_ISL_1287777 | 23/02/2021 | State of Mexico     | Human | Female | 41 | Hospitalized | Original | Nasopharyngeal and oropharyngeal swab |
| hCoV-19/Mexico/CMX-INER-IMSS-00355/2021  | EPI_ISL_1279600 | 23/02/2021 | Mexico City         | Human | Female | 62 | Hospitalized | Original | Pharyngeal swab                       |
| hCoV-19/Mexico/TAM_LANGEBIO-IMSS_0011/20 | EPI_ISL_1351435 | 23/02/2021 | Chihuahua           | Human | Male   | 66 | Ambulatory   | Original | Pharyngeal and Nasopharyngeal swab    |
| hCoV-19/Mexico/TAM_LANGEBIO-IMSS_0025/20 | EPI_ISL_1351471 | 23/02/2021 | Yucatan             | Human | Male   | 49 | Hospitalized | Original | Pharyngeal and Nasopharyngeal swab    |
| hCoV-19/Mexico/TAM_LANGEBIO-IMSS_0028/20 | EPI_ISL_1351480 | 23/02/2021 | Yucatan             | Human | Male   | 37 | Ambulatory   | Original | Pharyngeal and Nasopharyngeal swab    |



|                                          |                 |            |                 |       |        |     |              |          |                                       |
|------------------------------------------|-----------------|------------|-----------------|-------|--------|-----|--------------|----------|---------------------------------------|
| hCoV-19/Mexico/TAM_LANGEBIO_IMSS_0131/20 | EPI_ISL_1351793 | 23/02/2021 | State of Mexico | Human | Male   | 46  | Hospitalized | Original | Pharyngeal and Nasopharyngeal swab    |
| hCoV-19/Mexico/CMX-INER-IMSS-00184/2021  | EPI_ISL_1279455 | 23/02/2021 | Mexico City     | Human | Female | 54  | Hospitalized | Original | Nasopharyngeal and oropharyngeal swab |
| hCoV-19/Mexico/CMX-INER-IMSS-00185/2021  | EPI_ISL_1279456 | 23/02/2021 | Mexico City     | Human | Male   | 62  | Hospitalized | Original | Pharyngeal swab                       |
| hCoV-19/Mexico/CMX-INER-IMSS-00186/2021  | EPI_ISL_1279457 | 23/02/2021 | Mexico City     | Human | Female | 72  | Hospitalized | Original | Pharyngeal swab                       |
| hCoV-19/Mexico/MEX-INER-IMSS-00187/2021  | EPI_ISL_1279458 | 23/02/2021 | State of Mexico | Human | Female | 58  | Ambulatory   | Original | Pharyngeal swab                       |
| hCoV-19/Mexico/CMX-INER-IMSS-00188/2021  | EPI_ISL_1279459 | 23/02/2021 | Mexico City     | Human | Male   | 39  | Ambulatory   | Original | Pharyngeal swab                       |
| hCoV-19/Mexico/CMX-INER-IMSS-00189/2021  | EPI_ISL_1279460 | 23/02/2021 | Mexico City     | Human | Female | 100 | Hospitalized | Original | Pharyngeal swab                       |
| hCoV-19/Mexico/TLA-INER-IMSS-00285/2021  | EPI_ISL_1279540 | 23/02/2021 | Tlaxcala        | Human | Male   | 79  | Hospitalized | Original | Nasopharyngeal and oropharyngeal swab |
| hCoV-19/Mexico/MEX-INER-IMSS-00320/2021  | EPI_ISL_1279570 | 23/02/2021 | State of Mexico | Human | Female | 48  | Hospitalized | Original | Pharyngeal swab                       |
| hCoV-19/Mexico/MEX-INER-IMSS-00322/2021  | EPI_ISL_1279572 | 23/02/2021 | State of Mexico | Human | Female | 32  | Hospitalized | Original | Pharyngeal swab                       |
| hCoV-19/Mexico/MEX-INER-IMSS-00323/2021  | EPI_ISL_1279573 | 23/02/2021 | State of Mexico | Human | Male   | 45  | Ambulatory   | Original | Nasopharyngeal and oropharyngeal swab |
| hCoV-19/Mexico/MEX-INER-IMSS-00325/2021  | EPI_ISL_1279574 | 23/02/2021 | State of Mexico | Human | Male   | 27  | Ambulatory   | Original | Nasopharyngeal and oropharyngeal swab |
| hCoV-19/Mexico/MEX-INER-IMSS-00326/2021  | EPI_ISL_1279575 | 23/02/2021 | State of Mexico | Human | Male   | 69  | Hospitalized | Original | Nasopharyngeal and oropharyngeal swab |
| hCoV-19/Mexico/MEX-INER-IMSS-00327/2021  | EPI_ISL_1279576 | 23/02/2021 | State of Mexico | Human | Male   | 48  | Hospitalized | Original | Nasopharyngeal and oropharyngeal swab |
| hCoV-19/Mexico/MEX-INER-IMSS-00329/2021  | EPI_ISL_1279577 | 23/02/2021 | State of Mexico | Human | Male   | 47  | Hospitalized | Original | Pharyngeal swab                       |
| hCoV-19/Mexico/SLP-INER-IMSS-00331/2021  | EPI_ISL_1279579 | 23/02/2021 | San Luis Potosi | Human | Female | 69  | Hospitalized | Original | Nasopharyngeal and oropharyngeal swab |
| hCoV-19/Mexico/SLP-INER-IMSS-00336/2021  | EPI_ISL_1279584 | 23/02/2021 | San Luis Potosi | Human | Female | 40  | Hospitalized | Original | Nasopharyngeal and oropharyngeal swab |
| hCoV-19/Mexico/MEX-INER-IMSS-00338/2021  | EPI_ISL_1279585 | 23/02/2021 | State of Mexico | Human | Male   | 70  | Ambulatory   | Original | Nasopharyngeal and oropharyngeal swab |
| hCoV-19/Mexico/MEX-INER-IMSS-00339/2021  | EPI_ISL_1279586 | 23/02/2021 | State of Mexico | Human | Male   | 52  | Ambulatory   | Original | Nasopharyngeal and oropharyngeal swab |
| hCoV-19/Mexico/VER-INER-IMSS-00346/2021  | EPI_ISL_1279592 | 23/02/2021 | Veracruz        | Human | Female | 37  | Ambulatory   | Original | Nasopharyngeal and oropharyngeal swab |
| hCoV-19/Mexico/MEX-INER-IMSS-00351/2021  | EPI_ISL_1279597 | 23/02/2021 | State of Mexico | Human | Female | 40  | Hospitalized | Original | Pharyngeal swab                       |
| hCoV-19/Mexico/PUE-IBT-IMSS-149/2021     | EPI_ISL_1288351 | 23/02/2021 | Puebla          | Human | Male   | 18  | Ambulatory   | Original | Nasopharyngeal and oropharyngeal swab |
| hCoV-19/Mexico/MEX-INER-IMSS-00340/2021  | EPI_ISL_1279303 | 23/02/2021 | State of Mexico | Human | Male   | 40  | Ambulatory   | Original | Nasopharyngeal and oropharyngeal swab |
| hCoV-19/Mexico/MEX-INER-IMSS-00356/2021  | EPI_ISL_1279601 | 24/02/2021 | State of Mexico | Human | Female | 49  | Hospitalized | Original | Pharyngeal swab                       |
| hCoV-19/Mexico/TAM_LANGEBIO_IMSS_0009/20 | EPI_ISL_1351430 | 24/02/2021 | Nuevo Leon      | Human | Female | 24  | Ambulatory   | Original | Pharyngeal and Nasopharyngeal swab    |
| hCoV-19/Mexico/TAM_LANGEBIO_IMSS_0030/20 | EPI_ISL_1351486 | 24/02/2021 | Yucatan         | Human | Male   | 29  | Ambulatory   | Original | Pharyngeal and Nasopharyngeal swab    |
| hCoV-19/Mexico/TAM_LANGEBIO_IMSS_0040/20 | EPI_ISL_1351514 | 24/02/2021 | Jalisco         | Human | Male   | 67  | Hospitalized | Original | Nasopharyngeal swab                   |
| hCoV-19/Mexico/CMX-INER-IMSS-00341/2021  | EPI_ISL_1279587 | 24/02/2021 | Mexico City     | Human | Female | 89  | Hospitalized | Original | Pharyngeal swab                       |
| hCoV-19/Mexico/CMX-INER-IMSS-00342/2021  | EPI_ISL_1279588 | 24/02/2021 | Mexico City     | Human | Female | 43  | Ambulatory   | Original | Nasopharyngeal and oropharyngeal swab |
| hCoV-19/Mexico/CMX-INER-IMSS-00349/2021  | EPI_ISL_1279595 | 24/02/2021 | Mexico City     | Human | Male   | 5   | Ambulatory   | Original | Nasopharyngeal and oropharyngeal swab |
| hCoV-19/Mexico/CMX-INER-IMSS-00350/2021  | EPI_ISL_1279596 | 24/02/2021 | Mexico City     | Human | Female | 38  | Hospitalized | Original | Nasopharyngeal and oropharyngeal swab |
| hCoV-19/Mexico/CMX-INER-IMSS-00352/2021  | EPI_ISL_1279598 | 24/02/2021 | Mexico City     | Human | Male   | 37  | Hospitalized | Original | Nasopharyngeal and oropharyngeal swab |
| hCoV-19/Mexico/CMX_INER_IMSS_00681/2021  | EPI_ISL_2091137 | 24/02/2021 | Mexico City     | Human | Female | 33  | Ambulatory   | Original | Nasopharyngeal and oropharyngeal swab |
| hCoV-19/Mexico/TAM_LANGEBIO_IMSS_0010/20 | EPI_ISL_1351433 | 25/02/2021 | Tamaulipas      | Human | Female | 24  | Ambulatory   | Original | Pharyngeal and Nasopharyngeal swab    |
| hCoV-19/Mexico/TAM_LANGEBIO_IMSS_0032/20 | EPI_ISL_1351492 | 25/02/2021 | Yucatan         | Human | Male   | 75  | Hospitalized | Original | Pharyngeal and Nasopharyngeal swab    |
| hCoV-19/Mexico/CHH_INER_IMSS_00375/2021  | EPI_ISL_1585387 | 25/02/2021 | Chihuahua       | Human | Male   | 48  | Hospitalized | Original | Nasopharyngeal and oropharyngeal swab |
| hCoV-19/Mexico/MOR-IBT-IMSS-168/2021     | EPI_ISL_1288369 | 25/02/2021 | Morelos         | Human | Male   | 72  | Ambulatory   | Original | Nasopharyngeal and oropharyngeal swab |
| hCoV-19/Mexico/TAM_LANGEBIO_IMSS_0012/20 | EPI_ISL_1351437 | 26/02/2021 | Durango         | Human | Male   | 53  | Ambulatory   | Original | Pharyngeal and Nasopharyngeal swab    |
| hCoV-19/Mexico/TAM_LANGEBIO_IMSS_0043/20 | EPI_ISL_1351523 | 27/02/2021 | Guanajuato      | Human | Male   | 69  | Hospitalized | Original | Pharyngeal and Nasopharyngeal swab    |
| hCoV-19/Mexico/TAM_LANGEBIO_IMSS_0053/20 | EPI_ISL_1351552 | 27/02/2021 | Sonora          | Human | Male   | 71  | Hospitalized | Original | Pharyngeal and Nasopharyngeal swab    |
| hCoV-19/Mexico/TAM_LANGEBIO_IMSS_0013/20 | EPI_ISL_1351439 | 28/02/2021 | Coahuila        | Human | Male   | 52  | Hospitalized | Original | Pharyngeal and Nasopharyngeal swab    |

|                                                          |            |                 |       |        |         |              |          |                                       |
|----------------------------------------------------------|------------|-----------------|-------|--------|---------|--------------|----------|---------------------------------------|
| hCoV-19/Mexico/TAM_LANGEBIO_IMSS_0036/20 EPI_ISL_1351503 | 28/02/2021 | Quintana Roo    | Human | Male   | 70      | Ambulatory   | Original | Pharyngeal and Nasopharyngeal swab    |
| hCoV-19/Mexico/TAM_LANGEBIO_IMSS_0051/20 EPI_ISL_1351547 | 28/02/2021 | Sinaloa         | Human | Female | 29      | Ambulatory   | Original | Pharyngeal and Nasopharyngeal swab    |
| hCoV-19/Mexico/TAM_LANGEBIO_IMSS_0052/20 EPI_ISL_1351549 | 28/02/2021 | Sonora          | Human | Male   | 68      | Hospitalized | Original | Pharyngeal swab                       |
| hCoV-19/Mexico/ZAC_LANGEBIO_IMSS_0262/20 EPI_ISL_1381257 | 28/02/2021 | Zacatecas       | Human | Male   | 43      | Ambulatory   | Original | Pharyngeal / Nasopharyngeal swab      |
| hCoV-19/Mexico/CHH_INER_IMSS_00376/2021 EPI_ISL_1595595  | 28/02/2021 | Chihuahua       | Human | Male   | 41      | Hospitalized | Original | Nasopharyngeal and oropharyngeal swab |
| hCoV-19/Mexico/AGU-InDRE-IBT-2320/NC/2020                | 09/04/2020 | Aguascalientes  | Human | Male   | unknown | unknown      | Original | Pharyngeal swab                       |
| hCoV-19/Mexico/AGU-InDRE-IBT-308408/NC/2020              | 22/12/2020 | Aguascalientes  | Human | Female | 26      | Ambulatory   | Original | Pharyngeal swab                       |
| hCoV-19/Mexico/AGU-InDRE-IBT-308412/NC/2020              | 23/12/2020 | Aguascalientes  | Human | Female | 36      | Ambulatory   | Original | Pharyngeal swab                       |
| hCoV-19/Mexico/AGU-InDRE-IBT-308472/NC/2020              | 22/12/2020 | Aguascalientes  | Human | Female | 34      | Ambulatory   | Original | Pharyngeal swab                       |
| hCoV-19/Mexico/AGU-InDRE-IBT-308483/NC/2020              | 21/12/2020 | Aguascalientes  | Human | Female | 23      | Ambulatory   | Original | Pharyngeal swab                       |
| hCoV-19/Mexico/AGU-InDRE-IBT-308486/NC/2020              | 23/12/2020 | Aguascalientes  | Human | Male   | 54      | Ambulatory   | Original | Pharyngeal swab                       |
| hCoV-19/Mexico/AGU-InDRE-IBT-308487/NC/2020              | 22/12/2020 | Aguascalientes  | Human | Female | 23      | Ambulatory   | Original | Pharyngeal swab                       |
| hCoV-19/Mexico/BCN-InDRE-IBT-31425/NC/2020               | 16/04/2020 | Baja California | Human | Female | unknown | unknown      | Original | NA                                    |
| hCoV-19/Mexico/CHH_LANGEBIO_IMSS_36471/NC/2021           | 17/02/2021 | Chihuahua       | Human | Female | 64      | Hospitalized | Original | Pharyngeal /Nasopharyngeal swab       |
| hCoV-19/Mexico/CHH_LANGEBIO_IMSS_36483/NC/2021           | 20/02/2021 | Chihuahua       | Human | Male   | 69      | Hospitalized | Original | Pharyngeal /Nasopharyngeal swab       |
| hCoV-19/Mexico/CHH_LANGEBIO_IMSS_37309/NC/2021           | 25/02/2021 | Chihuahua       | Human | Male   | 58      | Hospitalized | Original | Pharyngeal /Nasopharyngeal swab       |
| hCoV-19/Mexico/CHH-InDRE-IBT-32583/NC/2020               | 03/07/2020 | Chihuahua       | Human | Female | 50      | Ambulatory   | Original | Pharyngeal swab                       |
| hCoV-19/Mexico/CHP-IBT-IMSS-18228/NC/2020                | 20/04/2020 | Chiapas         | Human | Male   | 38      | Ambulatory   | Original | Pharyngeal / Nasopharyngeal swab      |
| hCoV-19/Mexico/CHP-InDRE-IBT-24337/NC/2020               | 05/06/2020 | Chiapas         | Human | Male   | 75      | Ambulatory   | Original | NA                                    |
| hCoV-19/Mexico/CHP-InDRE-IBT-308232/NC/2020              | 23/12/2020 | Chiapas         | Human | Female | 48      | Ambulatory   | Original | Pharyngeal swab                       |
| hCoV-19/Mexico/CHP-InDRE-IBT-308281/NC/2020              | 23/12/2020 | Chiapas         | Human | Male   | 51      | Hospitalized | Original | Pharyngeal swab                       |
| hCoV-19/Mexico/CHP-InDRE-IBT-308290/NC/2021              | 05/01/2021 | Chiapas         | Human | Female | 31      | Ambulatory   | Original | Pharyngeal swab                       |
| hCoV-19/Mexico/CHP-InDRE-IBT-308298/NC/2020              | 22/12/2020 | Chiapas         | Human | Female | 24      | Ambulatory   | Original | Pharyngeal swab                       |
| hCoV-19/Mexico/CHP-InDRE-IBT-308302/NC/2020              | 22/12/2020 | Chiapas         | Human | Male   | 35      | Ambulatory   | Original | Pharyngeal swab                       |
| hCoV-19/Mexico/CHP-InDRE-IBT-308303/NC/2020              | 21/12/2020 | Chiapas         | Human | Male   | 33      | Ambulatory   | Original | Pharyngeal swab                       |
| hCoV-19/Mexico/CHP-InDRE-IBT-308305/NC/2020              | 21/12/2020 | Chiapas         | Human | Female | 27      | Ambulatory   | Original | Pharyngeal swab                       |
| hCoV-19/Mexico/CHP-InDRE-IBT-308309/NC/2020              | 22/12/2020 | Chiapas         | Human | Male   | 24      | Ambulatory   | Original | Pharyngeal swab                       |
| hCoV-19/Mexico/CMX-IBT-IMSS-46932/NC/2021                | 29/01/2021 | Mexico City     | Human | Female | 75      | Hospitalized | Original | Pharyngeal swab / Nasopharyngeal swab |
| hCoV-19/Mexico/CMX-IBT-IMSS-46934/NC/2021                | 29/01/2021 | Mexico City     | Human | Male   | 24      | Hospitalized | Original | Pharyngeal swab / Nasopharyngeal swab |
| hCoV-19/Mexico/CMX-IBT-IMSS-47488/NC/2021                | 31/01/2021 | Mexico City     | Human | Male   | 48      | Hospitalized | Original | Pharyngeal swab / Nasopharyngeal swab |
| hCoV-19/Mexico/CMX-IBT-IMSS-47872/NC/2021                | 01/02/2021 | Mexico City     | Human | Male   | 51      | Hospitalized | Original | Pharyngeal swab / Nasopharyngeal swab |
| hCoV-19/Mexico/CMX-IBT-IMSS-47881/NC/2021                | 02/02/2021 | Mexico City     | Human | Female | 73      | Hospitalized | Original | Pharyngeal swab / Nasopharyngeal swab |
| hCoV-19/Mexico/CMX-IBT-IMSS-48574/NC/2021                | 02/02/2021 | Mexico City     | Human | Female | 91      | Hospitalized | Original | Pharyngeal swab / Nasopharyngeal swab |
| hCoV-19/Mexico/CMX-IBT-IMSS-48576/NC/2021                | 03/02/2021 | Mexico City     | Human | Male   | 80      | Hospitalized | Original | Pharyngeal swab / Nasopharyngeal swab |
| hCoV-19/Mexico/CMX-IBT-IMSS-48587/NC/2021                | 02/02/2021 | Mexico City     | Human | Male   | 60      | Hospitalized | Original | Pharyngeal swab / Nasopharyngeal swab |
| hCoV-19/Mexico/CMX-InDRE-IBT-37541/NC/2020               | 24/07/2020 | Mexico City     | Human | Female | 74      | Hospitalized | Original | Nasopharyngeal swab                   |
| hCoV-19/Mexico/CMX-INER-IBT-10/NC/2020                   | 13/11/2020 | Mexico City     | Human | Male   | unknown | Hospitalized | Original | Pharyngeal swab / Nasopharyngeal swab |
| hCoV-19/Mexico/CMX-INER-IBT-11/NC/2020                   | 13/11/2020 | Mexico City     | Human | Male   | unknown | Hospitalized | Original | Pharyngeal swab / Nasopharyngeal swab |
| hCoV-19/Mexico/CMX-INER-IBT-12/NC/2020                   | 14/11/2020 | Mexico City     | Human | Male   | unknown | Hospitalized | Original | Pharyngeal swab / Nasopharyngeal swab |
| hCoV-19/Mexico/CMX-INER-IBT-14/NC/2020                   | 16/11/2020 | Mexico City     | Human | Female | unknown | Hospitalized | Original | Pharyngeal swab / Nasopharyngeal swab |
| hCoV-19/Mexico/CMX-INER-IBT-15/NC/2020                   | 16/11/2020 | Mexico City     | Human | Female | unknown | Hospitalized | Original | Pharyngeal swab / Nasopharyngeal swab |

[illegible]

|                                                |            |                 |       |         |         |              |          |                                       |
|------------------------------------------------|------------|-----------------|-------|---------|---------|--------------|----------|---------------------------------------|
| hCoV-19/Mexico/COA_LANGEBIO_IMSS_38056/NC/2021 | 26/02/2021 | Coahuila        | Human | Female  | 77      | Hospitalized | Original | Pharyngeal /Nasopharyngeal swab       |
| hCoV-19/Mexico/COA_LANGEBIO_IMSS_38556/NC/2021 | 28/02/2021 | Coahuila        | Human | Male    | 74      | Hospitalized | Original | Pharyngeal /Nasopharyngeal swab       |
| hCoV-19/Mexico/COA-InDRE-IBT-28845/NC/2020     | 31/05/2020 | Coahuila        | Human | unknown | 23      | Ambulatory   | Original | Pharyngeal swab                       |
| hCoV-19/Mexico/COL-InDRE-IBT-20796/NC/2020     | 01/06/2020 | Colima          | Human | Male    | 30      | Hospitalized | Original | Pharyngeal swab                       |
| hCoV-19/Mexico/COL-InDRE-IBT-39994/NC/2020     | 25/06/2020 | Colima          | Human | Female  | unknown | Hospitalized | Original | Pharyngeal swab                       |
| hCoV-19/Mexico/DUR_LANGEBIO_IMSS_36866/NC/2021 | 24/02/2021 | Durango         | Human | Male    | 62      | Hospitalized | Original | Pharyngeal /Nasopharyngeal swab       |
| hCoV-19/Mexico/DUR_LANGEBIO_IMSS_37503/NC/2021 | 25/02/2021 | Durango         | Human | Male    | 45      | Ambulatory   | Original | Pharyngeal /Nasopharyngeal swab       |
| hCoV-19/Mexico/DUR_LANGEBIO_IMSS_38016/NC/2021 | 28/02/2021 | Durango         | Human | Female  | 66      | Hospitalized | Original | Pharyngeal /Nasopharyngeal swab       |
| hCoV-19/Mexico/DUR_LANGEBIO_IMSS_38025/NC/2021 | 28/02/2021 | Durango         | Human | Female  | 68      | Hospitalized | Original | Pharyngeal /Nasopharyngeal swab       |
| hCoV-19/Mexico/DUR-InDRE-IBT-34067/NC/2020     | 01/06/2020 | Durango         | Human | Female  | 32      | unknown      | Original | Nasopharyngeal swab                   |
| hCoV-19/Mexico/DUR-InDRE-IBT-34216/NC/2020     | 08/06/2020 | Durango         | Human | Female  | 39      | Ambulatory   | Original | Nasopharyngeal swab                   |
| hCoV-19/Mexico/HID-InDRE-IBT-23549/NC/2020     | 02/06/2020 | Hidalgo         | Human | Male    | 79      | Deceased     | Original | Nasopharyngeal swab                   |
| hCoV-19/Mexico/HID-InDRE-IBT-23555/NC/2020     | 04/06/2020 | Hidalgo         | Human | Male    | 42      | Deceased     | Original | Nasopharyngeal swab                   |
| hCoV-19/Mexico/HID-InDRE-IBT-23556/NC/2020     | 04/06/2020 | Hidalgo         | Human | Male    | 29      | Ambulatory   | Original | Pharyngeal swab                       |
| hCoV-19/Mexico/JAL-InDRE-IBT-43035/NC/2020     | 30/07/2020 | Jalisco         | Human | Female  | 24      | Hospitalized | Original | Nasopharyngeal swab                   |
| hCoV-19/Mexico/MEX-IBT-IMSS-46960/NC/2021      | 30/01/2021 | State of Mexico | Human | Male    | 74      | Hospitalized | Original | Pharyngeal swab / Nasopharyngeal swab |
| hCoV-19/Mexico/MEX-IBT-IMSS-46962/NC/2021      | 30/01/2021 | State of Mexico | Human | Female  | 61      | Hospitalized | Original | Pharyngeal swab / Nasopharyngeal swab |
| hCoV-19/Mexico/MEX-IBT-IMSS-48296/NC/2021      | 29/01/2021 | State of Mexico | Human | Female  | 43      | Hospitalized | Original | Pharyngeal swab                       |
| hCoV-19/Mexico/MEX-IBT-IMSS-48303/NC/2021      | 30/01/2021 | State of Mexico | Human | Male    | 56      | Hospitalized | Original | Pharyngeal swab / Nasopharyngeal swab |
| hCoV-19/Mexico/MEX-IBT-IMSS-48308/NC/2021      | 31/01/2021 | State of Mexico | Human | Male    | 82      | Hospitalized | Original | Pharyngeal swab / Nasopharyngeal swab |
| hCoV-19/Mexico/MEX-IBT-IMSS-48313/NC/2021      | 30/01/2021 | State of Mexico | Human | Male    | 43      | Hospitalized | Original | Pharyngeal swab                       |
| hCoV-19/Mexico/MEX-IBT-IMSS-48336/NC/2021      | 01/02/2021 | State of Mexico | Human | Female  | 71      | Hospitalized | Original | Pharyngeal swab / Nasopharyngeal swab |
| hCoV-19/Mexico/MOR-InDRE-IBT-307998/NC/2020    | 22/12/2020 | Morelos         | Human | Female  | 41      | Ambulatory   | Original | Pharyngeal swab                       |
| hCoV-19/Mexico/MOR-InDRE-IBT-308004/NC/2020    | 22/12/2020 | Morelos         | Human | Male    | 35      | Ambulatory   | Original | Pharyngeal swab                       |
| hCoV-19/Mexico/MOR-InDRE-IBT-308212/NC/2020    | 23/12/2020 | Morelos         | Human | Male    | 30      | Ambulatory   | Original | Pharyngeal swab                       |
| hCoV-19/Mexico/MOR-InDRE-IBT-308214/NC/2020    | 23/12/2020 | Morelos         | Human | Male    | 45      | Ambulatory   | Original | Pharyngeal swab                       |
| hCoV-19/Mexico/MOR-InDRE-IBT-308234/NC/2020    | 23/12/2020 | Morelos         | Human | Male    | 28      | Ambulatory   | Original | Pharyngeal swab                       |
| hCoV-19/Mexico/MOR-InDRE-IBT-308259/NC/2020    | 23/12/2020 | Morelos         | Human | Male    | 49      | Ambulatory   | Original | Pharyngeal swab                       |
| hCoV-19/Mexico/MOR-InDRE-IBT-308329/NC/2020    | 22/12/2020 | Morelos         | Human | Male    | 36      | Ambulatory   | Original | Pharyngeal swab                       |
| hCoV-19/Mexico/MOR-InDRE-IBT-308342/NC/2020    | 21/12/2020 | Morelos         | Human | Female  | 45      | Ambulatory   | Original | Pharyngeal swab                       |
| hCoV-19/Mexico/MOR-InDRE-IBT-308351/NC/2020    | 21/12/2020 | Morelos         | Human | Female  | 44      | Ambulatory   | Original | Pharyngeal swab                       |
| hCoV-19/Mexico/NAY-InDRE-IBT-25291/NC/2020     | 21/05/2020 | Nayarit         | Human | Male    | unknown | Ambulatory   | Original | Pharyngeal swab                       |
| hCoV-19/Mexico/NLE_LANGEBIO_IMSS_34985/NC/2021 | 21/02/2021 | Nuevo Leon      | Human | Male    | 67      | Hospitalized | Original | Nasopharyngeal swab                   |
| hCoV-19/Mexico/NLE_LANGEBIO_IMSS_35136/NC/2021 | 22/02/2021 | Nuevo Leon      | Human | Male    | 25      | Ambulatory   | Original | Pharyngeal /Nasopharyngeal swab       |
| hCoV-19/Mexico/NLE_LANGEBIO_IMSS_35312/NC/2021 | 21/02/2021 | Nuevo Leon      | Human | Female  | 33      | Ambulatory   | Original | Pharyngeal /Nasopharyngeal swab       |
| hCoV-19/Mexico/NLE_LANGEBIO_IMSS_35857/NC/2021 | 23/02/2021 | Nuevo Leon      | Human | Female  | 32      | Hospitalized | Original | Pharyngeal /Nasopharyngeal swab       |
| hCoV-19/Mexico/NLE_LANGEBIO_IMSS_37009/NC/2021 | 25/02/2021 | Nuevo Leon      | Human | Male    | 57      | Hospitalized | Original | Pharyngeal /Nasopharyngeal swab       |
| hCoV-19/Mexico/NLE_LANGEBIO_IMSS_37061/NC/2021 | 26/02/2021 | Nuevo Leon      | Human | Male    | 67      | Hospitalized | Original | Pharyngeal /Nasopharyngeal swab       |
| hCoV-19/Mexico/NLE_LANGEBIO_IMSS_37456/NC/2021 | 26/02/2021 | Nuevo Leon      | Human | Female  | 79      | Hospitalized | Original | Pharyngeal /Nasopharyngeal swab       |
| hCoV-19/Mexico/NLE-InDRE-IBT-25241/NC/2020     | 04/06/2020 | Nuevo Leon      | Human | Female  | 66      | Hospitalized | Original | Pharyngeal swab                       |
| hCoV-19/Mexico/NLE-InDRE-IBT-25243/NC/2020     | 05/06/2020 | Nuevo Leon      | Human | Male    | 51      | Hospitalized | Original | Pharyngeal swab                       |



|                                                |            |                 |       |        |         |              |          |                                       |
|------------------------------------------------|------------|-----------------|-------|--------|---------|--------------|----------|---------------------------------------|
| hCoV-19/Mexico/OAX-InDRE-IBT-27468/NC/2020     | 03/06/2020 | Oaxaca          | Human | Female | 69      | Ambulatory   | Original | Pharyngeal swab                       |
| hCoV-19/Mexico/OAX-InDRE-IBT-27475/NC/2020     | 04/06/2020 | Oaxaca          | Human | Male   | unknown | unknown      | Original | Pharyngeal swab                       |
| hCoV-19/Mexico/PUE_LANGEBIO_IMSS_81667/NC/2021 | 28/02/2021 | Puebla          | Human | Male   | 59      | Hospitalized | Original | Pharyngeal /Nasopharyngeal swab       |
| hCoV-19/Mexico/PUE-IBT-IMSS-47245/NC/2021      | 31/01/2021 | Puebla          | Human | Male   | 41      | Hospitalized | Original | Pharyngeal swab                       |
| hCoV-19/Mexico/PUE-IBT-IMSS-48688/NC/2021      | 30/01/2021 | Puebla          | Human | Female | 49      | Ambulatory   | Original | Pharyngeal swab                       |
| hCoV-19/Mexico/PUE-InDRE-IBT-28747/NC/2020     | 05/06/2020 | Puebla          | Human | Male   | unknown | unknown      | Original | Pharyngeal swab                       |
| hCoV-19/Mexico/PUE-InDRE-IBT-308002/NC/2020    | 23/12/2020 | Puebla          | Human | Male   | 33      | Ambulatory   | Original | Pharyngeal swab                       |
| hCoV-19/Mexico/PUE-InDRE-IBT-308027/NC/2020    | 22/12/2020 | Puebla          | Human | Female | 27      | Ambulatory   | Original | Pharyngeal swab                       |
| hCoV-19/Mexico/PUE-InDRE-IBT-308032/NC/2020    | 22/12/2020 | Puebla          | Human | Male   | 30      | Ambulatory   | Original | Pharyngeal swab                       |
| hCoV-19/Mexico/PUE-InDRE-IBT-308052/NC/2020    | 23/12/2020 | Puebla          | Human | Female | 28      | Ambulatory   | Original | Pharyngeal swab                       |
| hCoV-19/Mexico/PUE-InDRE-IBT-308062/NC/2020    | 21/12/2020 | Puebla          | Human | Female | 30      | Ambulatory   | Original | Pharyngeal swab                       |
| hCoV-19/Mexico/PUE-InDRE-IBT-308100/NC/2020    | 22/12/2020 | Puebla          | Human | Male   | 58      | Ambulatory   | Original | Pharyngeal swab                       |
| hCoV-19/Mexico/PUE-InDRE-IBT-308102/NC/2020    | 23/12/2020 | Puebla          | Human | Male   | 48      | Ambulatory   | Original | Pharyngeal swab                       |
| hCoV-19/Mexico/PUE-InDRE-IBT-308107/NC/2020    | 22/12/2020 | Puebla          | Human | Female | 40      | Ambulatory   | Original | Pharyngeal swab                       |
| hCoV-19/Mexico/PUE-InDRE-IBT-308128/NC/2020    | 21/12/2020 | Puebla          | Human | Male   | 29      | Ambulatory   | Original | Pharyngeal swab                       |
| hCoV-19/Mexico/PUE-InDRE-IBT-308132/NC/2020    | 22/12/2020 | Puebla          | Human | Female | 34      | Ambulatory   | Original | Pharyngeal swab                       |
| hCoV-19/Mexico/PUE-InDRE-IBT-308135/NC/2020    | 23/12/2020 | Puebla          | Human | Male   | 56      | Ambulatory   | Original | Pharyngeal swab                       |
| hCoV-19/Mexico/PUE-InDRE-IBT-308138/NC/2020    | 23/12/2020 | Puebla          | Human | Male   | 32      | Ambulatory   | Original | Pharyngeal swab                       |
| hCoV-19/Mexico/PUE-InDRE-IBT-308154/NC/2020    | 22/12/2020 | Puebla          | Human | Female | 26      | Ambulatory   | Original | Pharyngeal swab                       |
| hCoV-19/Mexico/PUE-InDRE-IBT-308173/NC/2020    | 22/12/2020 | Puebla          | Human | Male   | 53      | Ambulatory   | Original | Pharyngeal swab                       |
| hCoV-19/Mexico/PUE-InDRE-IBT-308186/NC/2020    | 25/12/2020 | Puebla          | Human | Male   | 38      | Ambulatory   | Original | Pharyngeal swab                       |
| hCoV-19/Mexico/PUE-InDRE-IBT-308366/NC/2020    | 21/12/2020 | Puebla          | Human | Female | 58      | Deceased     | Original | Pharyngeal swab                       |
| hCoV-19/Mexico/PUE-InDRE-IBT-308405/NC/2020    | 23/12/2020 | Puebla          | Human | Female | 33      | Ambulatory   | Original | Pharyngeal swab                       |
| hCoV-19/Mexico/PUE-InDRE-IBT-308415/NC/2020    | 23/12/2020 | Puebla          | Human | Male   | 44      | Ambulatory   | Original | Pharyngeal swab                       |
| hCoV-19/Mexico/PUE-InDRE-IBT-308424/NC/2020    | 22/12/2020 | Puebla          | Human | Female | 22      | Ambulatory   | Original | Pharyngeal swab                       |
| hCoV-19/Mexico/PUE-InDRE-IBT-308426/NC/2020    | 18/12/2020 | Puebla          | Human | Male   | 38      | Ambulatory   | Original | Pharyngeal swab                       |
| hCoV-19/Mexico/PUE-InDRE-IBT-308428/NC/2020    | 18/12/2020 | Puebla          | Human | Male   | 20      | Ambulatory   | Original | Pharyngeal swab                       |
| hCoV-19/Mexico/PUE-InDRE-IBT-308441/NC/2020    | 17/12/2020 | Puebla          | Human | Male   | 43      | Ambulatory   | Original | Pharyngeal swab                       |
| hCoV-19/Mexico/PUE-InDRE-IBT-308454/NC/2020    | 24/12/2020 | Puebla          | Human | Male   | 32      | Ambulatory   | Original | Pharyngeal swab                       |
| hCoV-19/Mexico/PUE-InDRE-IBT-308466/NC/2020    | 22/12/2020 | Puebla          | Human | Male   | 62      | Ambulatory   | Original | Pharyngeal swab                       |
| hCoV-19/Mexico/QUE-InDRE-IBT-21063/NC/2020     | 06/06/2020 | Queretaro       | Human | Female | 19      | Ambulatory   | Original | Pharyngeal swab                       |
| hCoV-19/Mexico/QUE-InDRE-IBT-21066/NC/2020     | 03/06/2020 | Queretaro       | Human | Female | 55      | Hospitalized | Original | Nasopharyngeal swab                   |
| hCoV-19/Mexico/QUE-InDRE-IBT-21067/NC/2020     | 26/05/2020 | Queretaro       | Human | Female | 38      | Ambulatory   | Original | Nasopharyngeal swab                   |
| hCoV-19/Mexico/SIN-InDRE-IBT-27557/NC/2020     | 05/06/2020 | Sinaloa         | Human | Female | 54      | Ambulatory   | Original | NA                                    |
| hCoV-19/Mexico/SLP-IBT-IMSS-48517/NC/2021      | 02/02/2021 | San Luis Potosi | Human | Female | 71      | Hospitalized | Original | Pharyngeal swab / Nasopharyngeal swab |
| hCoV-19/Mexico/SLP-IBT-IMSS-48530/NC/2021      | 30/01/2021 | San Luis Potosi | Human | Female | 48      | Ambulatory   | Original | Pharyngeal swab / Nasopharyngeal swab |
| hCoV-19/Mexico/SLP-IBT-IMSS-48798/NC/2021      | 01/02/2021 | San Luis Potosi | Human | Male   | 45      | Ambulatory   | Original | Pharyngeal swab / Nasopharyngeal swab |
| hCoV-19/Mexico/SLP-IBT-IMSS-48825/NC/2021      | 30/01/2021 | San Luis Potosi | Human | Female | 75      | Ambulatory   | Original | Pharyngeal swab / Nasopharyngeal swab |
| hCoV-19/Mexico/SLP-InDRE-IBT-977/NC/2020       | 09/04/2020 | San Luis Potosi | Human | Male   | 6       | Ambulatory   | Original | Nasopharyngeal swab                   |
| hCoV-19/Mexico/SLP-InDRE-IBT-978/NC/2020       | 09/04/2020 | San Luis Potosi | Human | Female | 33      | Ambulatory   | Original | Pharyngeal swab                       |
| hCoV-19/Mexico/SON_LANGEBIO_IMSS_28900/NC/2021 | 28/02/2021 | Sonora          | Human | Male   | 62      | Hospitalized | Original | Pharyngeal swab                       |

|                                                |                |            |                 |       |        |    |              |          |                                       |
|------------------------------------------------|----------------|------------|-----------------|-------|--------|----|--------------|----------|---------------------------------------|
| hCoV-19/Mexico/SON-InDRE-IBT-29407/NC/2020     |                | 07/06/2020 | Sonora          | Human | Male   | 60 | Hospitalized | Original | Pharyngeal swab                       |
| hCoV-19/Mexico/SON-InDRE-IBT-29413/NC/2020     |                | 09/06/2020 | Sonora          | Human | Male   | 32 | Hospitalized | Original | Pharyngeal swab                       |
| hCoV-19/Mexico/TAB-InDRE-IBT-28657/NC/2020     |                | 10/06/2020 | Tabasco         | Human | Female | 51 | Hospitalized | Original | Pharyngeal swab                       |
| hCoV-19/Mexico/TLA-InDRE-IBT-24011/NC/2020     |                | 02/06/2020 | Tlaxcala        | Human | Female | 54 | Deceased     | Original | NA                                    |
| hCoV-19/Mexico/TLA-InDRE-IBT-24014/NC/2020     |                | 03/06/2020 | Tlaxcala        | Human | Male   | 43 | Hospitalized | Original | NA                                    |
| hCoV-19/Mexico/VER-IBT-IMSS-48502/NC/2021      |                | 30/01/2021 | Veracruz        | Human | Male   | 26 | Hospitalized | Original | Pharyngeal swab / Nasopharyngeal swab |
| hCoV-19/Mexico/YUC_LANGEBIO_IMSS_05338/NC/2021 |                | 25/02/2021 | Yucatan         | Human | Male   | 73 | Hospitalized | Original | Nasopharyngeal swab                   |
| hCoV-19/Mexico/YUC-InDRE-IBT-22139/NC/2020     |                | 01/06/2020 | Yucatan         | Human | Male   | 26 | Ambulatory   | Original | Pharyngeal swab                       |
| hCoV-19/Mexico/CMX-InDRE-01/2020               | EPI_ISL_412972 | 27/02/2020 | Mexico City     | Human | Male   | 35 | Hospitalized | Original | Nasopharyngeal swab                   |
| hCoV-19/Mexico/CMX-InDRE-07/2020               | EPI_ISL_452139 | 28/02/2020 | State of Mexico | Human | Male   | 45 | Released     | Original | Nasopharyngeal swab                   |
| hCoV-19/Mexico/CMX-InDRE_03/2020               | EPI_ISL_424667 | 04/03/2020 | State of Mexico | Human | Male   | 71 | unknown      | Original | Tracheal Swab                         |
| hCoV-19/Mexico/QUE-InDRE-04/2020               | EPI_ISL_424670 | 10/03/2020 | Queretaro       | Human | Male   | 43 | unknown      | Original | Oropharyngeal swab                    |
| hCoV-19/Mexico/CMX-INCMNSZ-02/2020             | EPI_ISL_426362 | 10/03/2020 | Mexico City     | Human | Male   | 71 | unknown      | Original | Pharyngeal and Nasopharyngeal swab    |
| hCoV-19/Mexico/CMX-InDRE-08/2020               | EPI_ISL_452141 | 11/03/2020 | State of Mexico | Human | Male   | 38 | Released     | Original | Nasopharyngeal swab                   |
| hCoV-19/Mexico/DUR-InDRE-09/2020               | EPI_ISL_455432 | 11/03/2020 | Durango         | Human | Male   | 74 | Deceased     | Original | Oropharyngeal swab                    |
| hCoV-19/Mexico/CMX-InDRE_15/2020               | EPI_ISL_455439 | 11/03/2020 | Mexico City     | Human | Male   | 39 | Released     | Original | Oropharyngeal swab                    |
| hCoV-19/Mexico/PUE-InDRE-05/2020               | EPI_ISL_424672 | 11/03/2020 | Puebla          | Human | Male   | 31 | unknown      | Original | Oropharyngeal swab                    |
| hCoV-19/Mexico/CMX-INER-01/2020                | EPI_ISL_424345 | 12/03/2020 | Mexico City     | Human | Male   | 42 | unknown      | Original | Nasopharyngeal swab                   |
| hCoV-19/Mexico/CMX-InDRE_12/2020               | EPI_ISL_455436 | 12/03/2020 | Mexico City     | Human | Male   | 32 | Released     | Original | Oropharyngeal swab                    |
| hCoV-19/Mexico/QUE-InDRE-18/2020               | EPI_ISL_455456 | 12/03/2020 | Queretaro       | Human | Female | 44 | Released     | Original |                                       |
| hCoV-19/Mexico/CMX-InDRE-06/2020               | EPI_ISL_424673 | 12/03/2020 | Mexico City     | Human | Female | 63 | unknown      | Original | Oropharyngeal swab                    |
| hCoV-19/Mexico/CMX-INCMNSZ-01/2020             | EPI_ISL_426361 | 12/03/2020 | Mexico City     | Human | Male   | 32 | unknown      | Original | Pharyngeal and Nasopharyngeal swab    |
| hCoV-19/Mexico/CMX-INCMNSZ-03/2020             | EPI_ISL_426363 | 12/03/2020 | Mexico City     | Human | Male   | 38 | unknown      | Original | Pharyngeal and Nasopharyngeal swab    |
| hCoV-19/Mexico/CMX-INCMNSZ-04/2020             | EPI_ISL_426364 | 12/03/2020 | Mexico City     | Human | Male   | 70 | Deceased     | Original | Pharyngeal and Nasopharyngeal swab    |
| hCoV-19/Mexico/CMX-INCMNSZ-05/2020             | EPI_ISL_426365 | 12/03/2020 | Mexico City     | Human | Female | 70 | unknown      | Original | Pharyngeal and Nasopharyngeal swab    |
| hCoV-19/Mexico/CMX-INER-02/2020                | EPI_ISL_424348 | 13/03/2020 | Mexico City     | Human | Female | 55 | unknown      | Original | Nasopharyngeal swab                   |
| hCoV-19/Mexico/GRO-InDRE-10/2020               | EPI_ISL_455434 | 13/03/2020 | Guerrero        | Human | Male   | 33 | Released     | Original | Oropharyngeal swab                    |
| hCoV-19/Mexico/ROO-InDRE-14/2020               | EPI_ISL_455438 | 14/03/2020 | Quintana Roo    | Human | Male   | 45 | Released     | Original | Oropharyngeal swab                    |
| hCoV-19/Mexico/PUE-InDRE-17/2020               | EPI_ISL_455455 | 14/03/2020 | Puebla          | Human | Female | 32 | Released     | Original | Oropharyngeal swab                    |
| hCoV-19/Mexico/CMX-INER-04/2020                | EPI_ISL_424626 | 15/03/2020 | Mexico City     | Human | Female | 25 | unknown      | Original | Nasopharyngeal swab                   |
| hCoV-19/Mexico/CMX-INER-0006/2020              | EPI_ISL_837608 | 15/03/2020 | Mexico City     | Human | Male   | 41 | Deceased     | Original | Tracheal aspirate                     |
| hCoV-19/Mexico/NLE-UANL-126/2020               | EPI_ISL_648595 | 16/03/2020 | Nuevo Leon      | Human | Female | 58 | unknown      | Original |                                       |
| hCoV-19/Mexico/CMX-INER-05/2020                | EPI_ISL_424627 | 16/03/2020 | Mexico City     | Human | Male   | 38 | unknown      | Original | Nasopharyngeal swab                   |
| hCoV-19/Mexico/NLE-UANL-001/2020               | EPI_ISL_779169 | 16/03/2020 | Nuevo Leon      | Human | Female | 29 | unknown      | Original |                                       |
| hCoV-19/Mexico/JAL-InDRE-16/2020               | EPI_ISL_455454 | 18/03/2020 | Jalisco         | Human | Male   | 58 | Deceased     | Original | Oropharyngeal swab                    |
| hCoV-19/Mexico/JAL-InDRE-11/2020               | EPI_ISL_455435 | 20/03/2020 | Jalisco         | Human | Male   | 56 | Deceased     | Original | Oropharyngeal swab                    |
| hCoV-19/Mexico/CMX-INER-0007/2020              | EPI_ISL_837609 | 20/03/2020 | Mexico City     | Human | Female | 82 | Deceased     | Original | Oropharyngeal swab                    |
| hCoV-19/Mexico/CMX-INER-0008/2020              | EPI_ISL_837610 | 20/03/2020 | Mexico City     | Human | Male   | 40 | Deceased     | Original | Oropharyngeal swab                    |
| hCoV-19/Mexico/CMX-InDRE-13/2020               | EPI_ISL_455437 | 21/03/2020 | Mexico City     | Human | Male   | 56 | Deceased     | Original |                                       |
| hCoV-19/Mexico/NLE-UANL-003/2020               | EPI_ISL_779170 | 22/03/2020 | Nuevo Leon      | Human | Male   | 64 | unknown      | Original |                                       |
| hCoV-19/Mexico/CMX-INER-0009/2020              | EPI_ISL_837611 | 22/03/2020 | Mexico City     | Human | Male   | 65 | Deceased     | Original | Tracheal aspirate                     |

|                                   |                |            |                 |       |         |         |              |          |                     |
|-----------------------------------|----------------|------------|-----------------|-------|---------|---------|--------------|----------|---------------------|
| hCoV-19/Mexico/CMX-INER-0010/2020 | EPI_ISL_837612 | 22/03/2020 | Mexico City     | Human | Male    | 60      | Deceased     | Original | Oropharyngeal swab  |
| hCoV-19/Mexico/CMX-INER-0011/2020 | EPI_ISL_837613 | 22/03/2020 | Mexico City     | Human | Male    | 30      | Deceased     | Original | Oropharyngeal swab  |
| hCoV-19/Mexico/CMX-INER-0012/2020 | EPI_ISL_837614 | 24/03/2020 | Mexico City     | Human | Male    | 46      | Deceased     | Original | Oropharyngeal swab  |
| hCoV-19/Mexico/CMX-INER-0013/2020 | EPI_ISL_837615 | 24/03/2020 | Mexico City     | Human | Female  | 60      | Hospitalized | Original | Oropharyngeal swab  |
| hCoV-19/Mexico/CMX-INER-0014/2020 | EPI_ISL_837616 | 24/03/2020 | Mexico City     | Human | Female  | 65      | Deceased     | Original | Oropharyngeal swab  |
| hCoV-19/Mexico/BCN-ALSR-1712/2020 | EPI_ISL_496373 | 25/03/2020 | Baja California | Human | unknown | unknown | unknown      | Original | Nasopharyngeal swab |
| hCoV-19/Mexico/NLE-UANL-004/2020  | EPI_ISL_779171 | 25/03/2020 | Nuevo Leon      | Human | Male    | 67      | unknown      | Original |                     |
| hCoV-19/Mexico/BCN-ALSR-1710/2020 | EPI_ISL_496371 | 26/03/2020 | Baja California | Human | unknown | unknown | unknown      | Original | Nasopharyngeal swab |
| hCoV-19/Mexico/BCN-ALSR-1711/2020 | EPI_ISL_496372 | 26/03/2020 | Baja California | Human | unknown | unknown | unknown      | Original | Nasopharyngeal swab |
| hCoV-19/Mexico/CMX-INER-0015/2020 | EPI_ISL_837617 | 26/03/2020 | Mexico City     | Human | Male    | 49      | Deceased     | Original | Tracheal aspirate   |
| hCoV-19/Mexico/BCN-ALSR-1709/2020 | EPI_ISL_496370 | 27/03/2020 | Baja California | Human | unknown | unknown | unknown      | Original | Nasopharyngeal swab |
| hCoV-19/Mexico/GUA-InDRE-19/2020  | EPI_ISL_493334 | 27/03/2020 | Guanajuato      | Human | Female  | 73      | Deceased     | Original | Oropharyngeal swab  |
| hCoV-19/Mexico/CMX-INER-0016/2020 | EPI_ISL_837618 | 28/03/2020 | Mexico City     | Human | Female  | 34      | Deceased     | Original | Tracheal aspirate   |
| hCoV-19/Mexico/CMX-INER-0017/2020 | EPI_ISL_837619 | 29/03/2020 | Mexico City     | Human | Female  | 65      | Hospitalized | Original | Tracheal aspirate   |
| hCoV-19/Mexico/CMX-INER-0018/2020 | EPI_ISL_837620 | 30/03/2020 | Mexico City     | Human | Male    | 53      | Deceased     | Original | Tracheal aspirate   |
| hCoV-19/Mexico/SON-InDRE-99/2020  | EPI_ISL_872089 | 01/04/2020 | Sonora          | Human | Female  | 71      | Deceased     | Original | Oropharyngeal swab  |
| hCoV-19/Mexico/CMX-INER-0019/2020 | EPI_ISL_837621 | 01/04/2020 | Mexico City     | Human | Male    | 50      | Deceased     | Original | Tracheal aspirate   |
| hCoV-19/Mexico/CMX-INER-0020/2020 | EPI_ISL_837622 | 01/04/2020 | Mexico City     | Human | Female  | 61      | Deceased     | Original | Nasopharyngeal swab |
| hCoV-19/Mexico/CMX-INER-0021/2020 | EPI_ISL_837623 | 01/04/2020 | Mexico City     | Human | Female  | 83      | Hospitalized | Original | Nasopharyngeal swab |
| hCoV-19/Mexico/GUA-InDRE-20/2020  | EPI_ISL_493335 | 02/04/2020 | Guanajuato      | Human | Female  | 74      | Deceased     | Original | Oropharyngeal swab  |
| hCoV-19/Mexico/CMX-INER-0022/2020 | EPI_ISL_837624 | 02/04/2020 | Mexico City     | Human | Male    | 71      | Released     | Original | Nasopharyngeal swab |
| hCoV-19/Mexico/CMX-INER-0023/2020 | EPI_ISL_837625 | 03/04/2020 | Mexico City     | Human | Female  | 54      | Deceased     | Original |                     |
| hCoV-19/Mexico/CMX-INER-0024/2020 | EPI_ISL_837626 | 03/04/2020 | Mexico City     | Human | Male    | 44      | Deceased     | Original | Nasopharyngeal swab |
| hCoV-19/Mexico/TAB-InDRE-100/2020 | EPI_ISL_872090 | 04/04/2020 | Tabasco         | Human | Male    | 38      | Deceased     | Original | Oropharyngeal swab  |
| hCoV-19/Mexico/CMX-InDRE-101/2020 | EPI_ISL_872091 | 04/04/2020 | State of Mexico | Human | Male    | 24      | Deceased     | Original | Oropharyngeal swab  |
| hCoV-19/Mexico/SON-InDRE-103/2020 | EPI_ISL_872093 | 04/04/2020 | Sonora          | Human | Male    | 33      | Deceased     | Original | Oropharyngeal swab  |
| hCoV-19/Mexico/CMX-INER-0025/2020 | EPI_ISL_837627 | 04/04/2020 | Mexico City     | Human | Male    | 40      | Hospitalized | Original | Nasopharyngeal swab |
| hCoV-19/Mexico/CMX-INER-0026/2020 | EPI_ISL_837628 | 04/04/2020 | Mexico City     | Human | Male    | 34      | Released     | Original | Nasopharyngeal swab |
| hCoV-19/Mexico/CMX-INER-0027/2020 | EPI_ISL_837629 | 06/04/2020 | Mexico City     | Human | Female  | 46      | Released     | Original | Nasopharyngeal swab |
| hCoV-19/Mexico/CMX-INER-0028/2020 | EPI_ISL_837630 | 06/04/2020 | Mexico City     | Human | Male    | 39      | Deceased     | Original | Tracheal aspirate   |
| hCoV-19/Mexico/CMX-INER-0029/2020 | EPI_ISL_837631 | 06/04/2020 | Mexico City     | Human | Male    | 50      | Hospitalized | Original | Tracheal aspirate   |
| hCoV-19/Mexico/CMX-INER-0030/2020 | EPI_ISL_837632 | 06/04/2020 | Mexico City     | Human | Male    | 27      | Released     | Original | Nasopharyngeal swab |
| hCoV-19/Mexico/CMX-INER-0031/2020 | EPI_ISL_837633 | 06/04/2020 | Mexico City     | Human | Male    | 38      | Hospitalized | Original | Nasopharyngeal swab |
| hCoV-19/Mexico/CMX-INER-0032/2020 | EPI_ISL_837634 | 07/04/2020 | Mexico City     | Human | Female  | 45      | Deceased     | Original | Nasopharyngeal swab |
| hCoV-19/Mexico/CMX-INER-0033/2020 | EPI_ISL_837635 | 08/04/2020 | Mexico City     | Human | Female  | 41      | Deceased     | Original | Nasopharyngeal swab |
| hCoV-19/Mexico/CMX-INER-0034/2020 | EPI_ISL_837636 | 08/04/2020 | Mexico City     | Human | Female  | 33      | Released     | Original | Nasopharyngeal swab |
| hCoV-19/Mexico/CMX-INER-0035/2020 | EPI_ISL_837637 | 08/04/2020 | Mexico City     | Human | Male    | 28      | Released     | Original | Nasopharyngeal swab |
| hCoV-19/Mexico/CMX-INER-0036/2020 | EPI_ISL_837638 | 08/04/2020 | Mexico City     | Human | Female  | 66      | Hospitalized | Original | Nasopharyngeal swab |
| hCoV-19/Mexico/CMX-INER-0037/2020 | EPI_ISL_837639 | 08/04/2020 | Mexico City     | Human | Male    | 59      | Deceased     | Original | Tracheal aspirate   |
| hCoV-19/Mexico/CMX-INER-0038/2020 | EPI_ISL_837640 | 08/04/2020 | Mexico City     | Human | Female  | 48      | Hospitalized | Original | Nasopharyngeal swab |
| hCoV-19/Mexico/CMX-InDRE-98/2020  | EPI_ISL_872088 | 09/04/2020 | Mexico City     | Human | Male    | 65      | Deceased     | Original | Oropharyngeal swab  |

|                                   |                |            |                 |       |         |         |              |          |                     |
|-----------------------------------|----------------|------------|-----------------|-------|---------|---------|--------------|----------|---------------------|
| hCoV-19/Mexico/QROO-InDRE-53/2020 | EPI_ISL_658904 | 10/04/2020 | Quintana Roo    | Human | Male    | 38      | Released     | Original | Oropharyngeal swab  |
| hCoV-19/Mexico/YUC-InDRE-95/2020  | EPI_ISL_861419 | 10/04/2020 | Yucatan         | Human | Female  | 38      | Deceased     | Original | Oropharyngeal swab  |
| hCoV-19/Mexico/CMX-INER-0040/2020 | EPI_ISL_837606 | 10/04/2020 | Mexico City     | Human | Male    | 43      | Deceased     | Original | Nasopharyngeal swab |
| hCoV-19/Mexico/CMX-INER-0039/2020 | EPI_ISL_837641 | 10/04/2020 | Mexico City     | Human | Female  | 70      | Deceased     | Original | Tracheal aspirate   |
| hCoV-19/Mexico/CMX-INER-0041/2020 | EPI_ISL_837642 | 10/04/2020 | Mexico City     | Human | Female  | 36      | Hospitalized | Original | Tracheal aspirate   |
| hCoV-19/Mexico/CMX-INER-0042/2020 | EPI_ISL_837643 | 10/04/2020 | Mexico City     | Human | Male    | 42      | Deceased     | Original | Tracheal aspirate   |
| hCoV-19/Mexico/CMX-INER-0043/2020 | EPI_ISL_837644 | 10/04/2020 | Mexico City     | Human | Female  | 46      | Released     | Original | Nasopharyngeal swab |
| hCoV-19/Mexico/CMX-INER-0044/2020 | EPI_ISL_837645 | 10/04/2020 | Mexico City     | Human | Female  | 57      | Released     | Original | Nasopharyngeal swab |
| hCoV-19/Mexico/CMX-INER-0045/2020 | EPI_ISL_837646 | 11/04/2020 | Mexico City     | Human | Male    | 56      | Deceased     | Original | Nasopharyngeal swab |
| hCoV-19/Mexico/ROO-InDRE-102/2020 | EPI_ISL_872092 | 13/04/2020 | Quintana Roo    | Human | Male    | 33      | Deceased     | Original | Oropharyngeal swab  |
| hCoV-19/Mexico/CMX-INER-0046/2020 | EPI_ISL_837647 | 13/04/2020 | Mexico City     | Human | Male    | 56      | Deceased     | Original | Tracheal aspirate   |
| hCoV-19/Mexico/CMX-INER-0047/2020 | EPI_ISL_837648 | 13/04/2020 | Mexico City     | Human | Male    | 63      | Deceased     | Original | Nasopharyngeal swab |
| hCoV-19/Mexico/CMX-INER-0048/2020 | EPI_ISL_837649 | 13/04/2020 | Mexico City     | Human | Male    | 58      | Deceased     | Original | Tracheal aspirate   |
| hCoV-19/Mexico/CMX-INER-0051/2020 | EPI_ISL_837604 | 14/04/2020 | Mexico City     | Human | Male    | 58      | Deceased     | Original | Tracheal aspirate   |
| hCoV-19/Mexico/CMX-INER-0049/2020 | EPI_ISL_837650 | 14/04/2020 | Mexico City     | Human | Male    | 33      | Deceased     | Original | Nasopharyngeal swab |
| hCoV-19/Mexico/CMX-INER-0050/2020 | EPI_ISL_837651 | 14/04/2020 | Mexico City     | Human | Female  | 41      | Hospitalized | Original | Nasopharyngeal swab |
| hCoV-19/Mexico/CMX-InDRE-96/2020  | EPI_ISL_861420 | 15/04/2020 | Mexico City     | Human | Male    | 35      | Deceased     | Original | Oropharyngeal swab  |
| hCoV-19/Mexico/CMX-INER-0052/2020 | EPI_ISL_837652 | 15/04/2020 | Mexico City     | Human | Male    | 34      | Hospitalized | Original | Nasopharyngeal swab |
| hCoV-19/Mexico/CMX-INER-0053/2020 | EPI_ISL_837653 | 15/04/2020 | Mexico City     | Human | Male    | 64      | Hospitalized | Original | Tracheal aspirate   |
| hCoV-19/Mexico/CMX-INER-0056/2020 | EPI_ISL_837600 | 16/04/2020 | Mexico City     | Human | Male    | 41      | Deceased     | Original | Nasopharyngeal swab |
| hCoV-19/Mexico/CMX-INER-0054/2020 | EPI_ISL_837654 | 16/04/2020 | Mexico City     | Human | Male    | 65      | Hospitalized | Original | Tracheal aspirate   |
| hCoV-19/Mexico/CMX-INER-0055/2020 | EPI_ISL_837655 | 16/04/2020 | Mexico City     | Human | Male    | 61      | Deceased     | Original | Nasopharyngeal swab |
| hCoV-19/Mexico/CMX-INER-0057/2020 | EPI_ISL_837656 | 16/04/2020 | Mexico City     | Human | Male    | 47      | Released     | Original | Nasopharyngeal swab |
| hCoV-19/Mexico/CMX-INER-0058/2020 | EPI_ISL_837657 | 16/04/2020 | Mexico City     | Human | Male    | 59      | Released     | Original | Nasopharyngeal swab |
| hCoV-19/Mexico/CMX-INER-0059/2020 | EPI_ISL_837658 | 16/04/2020 | Mexico City     | Human | Male    | 52      | Hospitalized | Original | Nasopharyngeal swab |
| hCoV-19/Mexico/SIN-InDRE-21/2020  | EPI_ISL_493336 | 17/04/2020 | Sinaloa         | Human | Male    | 67      | Deceased     | Original | Oropharyngeal swab  |
| hCoV-19/Mexico/CMX-INER-0060/2020 | EPI_ISL_837659 | 17/04/2020 | Mexico City     | Human | Male    | 39      | Deceased     | Original | Tracheal aspirate   |
| hCoV-19/Mexico/CMX-INER-0061/2020 | EPI_ISL_837660 | 17/04/2020 | Mexico City     | Human | Male    | 56      | Deceased     | Original | Tracheal aspirate   |
| hCoV-19/Mexico/CMX-INER-0062/2020 | EPI_ISL_837661 | 17/04/2020 | Mexico City     | Human | Male    | 36      | Hospitalized | Original | Nasopharyngeal swab |
| hCoV-19/Mexico/CMX-INER-0063/2020 | EPI_ISL_837662 | 18/04/2020 | Mexico City     | Human | Male    | 52      | Hospitalized | Original | Nasopharyngeal swab |
| hCoV-19/Mexico/CMX-INER-0064/2020 | EPI_ISL_837663 | 18/04/2020 | Mexico City     | Human | Male    | 34      | Released     | Original | Nasopharyngeal swab |
| hCoV-19/Mexico/CMX-INER-0065/2020 | EPI_ISL_837664 | 18/04/2020 | Mexico City     | Human | Female  | 24      | Hospitalized | Original | Nasopharyngeal swab |
| hCoV-19/Mexico/CMX-INER-0066/2020 | EPI_ISL_837665 | 18/04/2020 | Mexico City     | Human | Male    | 59      | Hospitalized | Original | Nasopharyngeal swab |
| hCoV-19/Mexico/CMX-INER-0067/2020 | EPI_ISL_837666 | 19/04/2020 | Mexico City     | Human | Female  | 53      | Hospitalized | Original | Nasopharyngeal swab |
| hCoV-19/Mexico/CMX-INER-0068/2020 | EPI_ISL_837667 | 19/04/2020 | Mexico City     | Human | Male    | 50      | Hospitalized | Original | Nasopharyngeal swab |
| hCoV-19/Mexico/BCN-ALSR-1708/2020 | EPI_ISL_496369 | 20/04/2020 | Baja California | Human | unknown | unknown | unknown      | Original | Nasopharyngeal swab |
| hCoV-19/Mexico/CMX-INER-0069/2020 | EPI_ISL_837668 | 20/04/2020 | Mexico City     | Human | Female  | unknown | unknown      | Original | Nasopharyngeal swab |
| hCoV-19/Mexico/CMX-INER-0070/2020 | EPI_ISL_837669 | 20/04/2020 | Mexico City     | Human | Male    | 53      | Released     | Original | Nasopharyngeal swab |
| hCoV-19/Mexico/BCN-ALSR-1707/2020 | EPI_ISL_496368 | 21/04/2020 | Baja California | Human | unknown | unknown | unknown      | Original | Nasopharyngeal swab |
| hCoV-19/Mexico/CMX-INER-0071/2020 | EPI_ISL_837670 | 21/04/2020 | Mexico City     | Human | Male    | 45      | Hospitalized | Original | Tracheal aspirate   |
| hCoV-19/Mexico/CMX-INER-0072/2020 | EPI_ISL_837671 | 21/04/2020 | Mexico City     | Human | Male    | 41      | Hospitalized | Original | Tracheal aspirate   |



|                                   |                |            |                 |       |         |         |              |          |                     |
|-----------------------------------|----------------|------------|-----------------|-------|---------|---------|--------------|----------|---------------------|
| hCoV-19/Mexico/CMX-INER-0073/2020 | EPI_ISL_837672 | 21/04/2020 | Mexico City     | Human | Male    | 59      | Deceased     | Original | Nasopharyngeal swab |
| hCoV-19/Mexico/BCN-ALSR-1698/2020 | EPI_ISL_496359 | 22/04/2020 | Baja California | Human | unknown | unknown | unknown      | Original | Nasopharyngeal swab |
| hCoV-19/Mexico/BCN-ALSR-1699/2020 | EPI_ISL_496360 | 22/04/2020 | Baja California | Human | unknown | unknown | unknown      | Original | Nasopharyngeal swab |
| hCoV-19/Mexico/BCN-ALSR-1700/2020 | EPI_ISL_496361 | 22/04/2020 | Baja California | Human | unknown | unknown | unknown      | Original | Nasopharyngeal swab |
| hCoV-19/Mexico/BCN-ALSR-1701/2020 | EPI_ISL_496362 | 22/04/2020 | Baja California | Human | unknown | unknown | unknown      | Original | Nasopharyngeal swab |
| hCoV-19/Mexico/BCN-ALSR-1702/2020 | EPI_ISL_496363 | 22/04/2020 | Baja California | Human | unknown | unknown | unknown      | Original | Nasopharyngeal swab |
| hCoV-19/Mexico/BCN-ALSR-1703/2020 | EPI_ISL_496364 | 22/04/2020 | Baja California | Human | unknown | unknown | unknown      | Original | Nasopharyngeal swab |
| hCoV-19/Mexico/BCN-ALSR-1704/2020 | EPI_ISL_496365 | 22/04/2020 | Baja California | Human | unknown | unknown | unknown      | Original | Nasopharyngeal swab |
| hCoV-19/Mexico/BCN-ALSR-1705/2020 | EPI_ISL_496366 | 22/04/2020 | Baja California | Human | unknown | unknown | unknown      | Original | Nasopharyngeal swab |
| hCoV-19/Mexico/BCN-ALSR-1706/2020 | EPI_ISL_496367 | 22/04/2020 | Baja California | Human | unknown | unknown | unknown      | Original | Nasopharyngeal swab |
| hCoV-19/Mexico/CMX-INER-0074/2020 | EPI_ISL_837673 | 22/04/2020 | Mexico City     | Human | Male    | 43      | Deceased     | Original | Tracheal aspirate   |
| hCoV-19/Mexico/CMX-INER-0075/2020 | EPI_ISL_837605 | 23/04/2020 | Mexico City     | Human | Male    | 53      | Deceased     | Original | Tracheal aspirate   |
| hCoV-19/Mexico/CMX-INER-0076/2020 | EPI_ISL_837674 | 23/04/2020 | Mexico City     | Human | Female  | 38      | Hospitalized | Original | Oropharyngeal swab  |
| hCoV-19/Mexico/VER-InDRE-104/2020 | EPI_ISL_872097 | 24/04/2020 | Veracruz        | Human | Male    | 39      | Deceased     | Original | Oropharyngeal swab  |
| hCoV-19/Mexico/BCN-ALSR-1696/2020 | EPI_ISL_496357 | 24/04/2020 | Baja California | Human | unknown | unknown | unknown      | Original | Nasopharyngeal swab |
| hCoV-19/Mexico/BCN-ALSR-1697/2020 | EPI_ISL_496358 | 24/04/2020 | Baja California | Human | unknown | unknown | unknown      | Original | Nasopharyngeal swab |
| hCoV-19/Mexico/CMX-INER-0077/2020 | EPI_ISL_837675 | 24/04/2020 | Mexico City     | Human | Male    | 29      | Released     | Original | Oropharyngeal swab  |
| hCoV-19/Mexico/BCN-ALSR-1695/2020 | EPI_ISL_496356 | 25/04/2020 | Baja California | Human | unknown | unknown | unknown      | Original | Nasopharyngeal swab |
| hCoV-19/Mexico/CMX-INER-0078/2020 | EPI_ISL_837676 | 25/04/2020 | Mexico City     | Human | Male    | 45      | Deceased     | Original | Tracheal aspirate   |
| hCoV-19/Mexico/CMX-INER-0079/2020 | EPI_ISL_837677 | 25/04/2020 | Mexico City     | Human | Male    | 67      | Deceased     | Original |                     |
| hCoV-19/Mexico/TAB-InDRE-105/2020 | EPI_ISL_872098 | 26/04/2020 | Tabasco         | Human | Male    | 37      | Deceased     | Original | Oropharyngeal swab  |
| hCoV-19/Mexico/CMX-INER-0080/2020 | EPI_ISL_837678 | 26/04/2020 | Mexico City     | Human | Male    | 48      | Hospitalized | Original | Nasopharyngeal swab |
| hCoV-19/Mexico/BCN-ALSR-1691/2020 | EPI_ISL_496352 | 27/04/2020 | Baja California | Human | unknown | unknown | unknown      | Original | Nasopharyngeal swab |
| hCoV-19/Mexico/BCN-ALSR-1692/2020 | EPI_ISL_496353 | 27/04/2020 | Baja California | Human | unknown | unknown | unknown      | Original | Nasopharyngeal swab |
| hCoV-19/Mexico/BCN-ALSR-1693/2020 | EPI_ISL_496354 | 27/04/2020 | Baja California | Human | unknown | unknown | unknown      | Original | Nasopharyngeal swab |
| hCoV-19/Mexico/BCN-ALSR-1694/2020 | EPI_ISL_496355 | 27/04/2020 | Baja California | Human | unknown | unknown | unknown      | Original | Nasopharyngeal swab |
| hCoV-19/Mexico/CMX-INER-0081/2020 | EPI_ISL_837679 | 27/04/2020 | Mexico City     | Human | Female  | 55      | Hospitalized | Original | Oropharyngeal swab  |
| hCoV-19/Mexico/BCN-ALSR-1470/2020 | EPI_ISL_496340 | 28/04/2020 | Baja California | Human | unknown | unknown | unknown      | Original | Nasopharyngeal swab |
| hCoV-19/Mexico/BCN-ALSR-1471/2020 | EPI_ISL_496341 | 28/04/2020 | Baja California | Human | unknown | unknown | unknown      | Original | Nasopharyngeal swab |
| hCoV-19/Mexico/BCN-ALSR-1473/2020 | EPI_ISL_496342 | 28/04/2020 | Baja California | Human | unknown | unknown | unknown      | Original | Nasopharyngeal swab |
| hCoV-19/Mexico/BCN-ALSR-1474/2020 | EPI_ISL_496343 | 28/04/2020 | Baja California | Human | unknown | unknown | unknown      | Original | Nasopharyngeal swab |
| hCoV-19/Mexico/BCN-ALSR-1475/2020 | EPI_ISL_496344 | 28/04/2020 | Baja California | Human | unknown | unknown | unknown      | Original | Nasopharyngeal swab |
| hCoV-19/Mexico/BCN-ALSR-1476/2020 | EPI_ISL_496345 | 28/04/2020 | Baja California | Human | unknown | unknown | unknown      | Original | Nasopharyngeal swab |
| hCoV-19/Mexico/BCN-ALSR-1477/2020 | EPI_ISL_496346 | 28/04/2020 | Baja California | Human | unknown | unknown | unknown      | Original | Nasopharyngeal swab |
| hCoV-19/Mexico/BCN-ALSR-1478/2020 | EPI_ISL_496347 | 28/04/2020 | Baja California | Human | unknown | unknown | unknown      | Original | Nasopharyngeal swab |
| hCoV-19/Mexico/BCN-ALSR-1479/2020 | EPI_ISL_496348 | 28/04/2020 | Baja California | Human | unknown | unknown | unknown      | Original | Nasopharyngeal swab |
| hCoV-19/Mexico/BCN-ALSR-1485/2020 | EPI_ISL_496349 | 28/04/2020 | Baja California | Human | unknown | unknown | unknown      | Original | Nasopharyngeal swab |
| hCoV-19/Mexico/BCN-ALSR-1486/2020 | EPI_ISL_496350 | 28/04/2020 | Baja California | Human | unknown | unknown | unknown      | Original | Nasopharyngeal swab |
| hCoV-19/Mexico/BCN-ALSR-1690/2020 | EPI_ISL_496351 | 28/04/2020 | Baja California | Human | unknown | unknown | unknown      | Original | Nasopharyngeal swab |
| hCoV-19/Mexico/NLE-UANL-005/2020  | EPI_ISL_779172 | 28/04/2020 | Nuevo Leon      | Human | Male    | 51      | unknown      | Original |                     |
| hCoV-19/Mexico/BCN-ALSR-1466/2020 | EPI_ISL_496339 | 29/04/2020 | Baja California | Human | unknown | unknown | unknown      | Original | Nasopharyngeal swab |

|                                           |                 |            |                 |       |         |         |              |          |                     |
|-------------------------------------------|-----------------|------------|-----------------|-------|---------|---------|--------------|----------|---------------------|
| hCoV-19/Mexico/BCN-ALSR-1713/2020         | EPI_ISL_496374  | 29/04/2020 | Baja California | Human | unknown | unknown | unknown      | Original | Nasopharyngeal swab |
| hCoV-19/Mexico/BCN-ALSR-1714/2020         | EPI_ISL_496375  | 29/04/2020 | Baja California | Human | unknown | unknown | unknown      | Original | Nasopharyngeal swab |
| hCoV-19/Mexico/BCN-ALSR-1715/2020         | EPI_ISL_496376  | 29/04/2020 | Baja California | Human | unknown | unknown | unknown      | Original | Nasopharyngeal swab |
| hCoV-19/Mexico/CMX-INER-0082/2020         | EPI_ISL_837680  | 29/04/2020 | Mexico City     | Human | Female  | 49      | Released     | Original | Oropharyngeal swab  |
| hCoV-19/Mexico/CMX-INER-0083/2020         | EPI_ISL_837681  | 29/04/2020 | Mexico City     | Human | Female  | 36      | Released     | Original | Oropharyngeal swab  |
| hCoV-19/Mexico/CMX-INER-0084/2020         | EPI_ISL_837682  | 29/04/2020 | Mexico City     | Human | Male    | 64      | Hospitalized | Original | Nasopharyngeal swab |
| hCoV-19/Mexico/SLP-UASLP-AH1COV2SS024_S   | EPI_ISL_1494674 | 30/04/2020 | San Luis Potosi | Human | Male    | 42      | Deceased     | Original |                     |
| hCoV-19/Mexico/TLA-InDRE-97/2020          | EPI_ISL_861421  | 30/04/2020 | Tlaxcala        | Human | Female  | 28      | Deceased     | Original | Oropharyngeal swab  |
| hCoV-19/Mexico/TLA-InDRE-106/2020         | EPI_ISL_872099  | 30/04/2020 | Tlaxcala        | Human | Male    | 34      | Deceased     | Original | Oropharyngeal swab  |
| hCoV-19/Mexico/CMX-INER-0085/2020         | EPI_ISL_837683  | 30/04/2020 | Mexico City     | Human | Male    | 48      | Deceased     | Original | Nasopharyngeal swab |
| hCoV-19/Mexico/CHP-InDRE-23/2020          | EPI_ISL_493338  | 04/05/2020 | Chiapas         | Human | Female  | 68      | Deceased     | Original | Oropharyngeal swab  |
| hCoV-19/Mexico/GRO-InDRE-24/2020          | EPI_ISL_493339  | 04/05/2020 | Guerrero        | Human | Male    | 42      | Live         | Original | Oropharyngeal swab  |
| hCoV-19/Mexico/CMX-INER-0086/2020         | EPI_ISL_837684  | 04/05/2020 | Mexico City     | Human | Male    | 52      | Released     | Original | Oropharyngeal swab  |
| hCoV-19/Mexico/CMX-INER-0087/2020         | EPI_ISL_837685  | 06/05/2020 | Mexico City     | Human | Male    | 44      | Released     | Original | Oropharyngeal swab  |
| hCoV-19/Mexico/CMX-INER-0088/2020         | EPI_ISL_837686  | 07/05/2020 | Mexico City     | Human | Male    | 56      | Hospitalized | Original | Tracheal aspirate   |
| hCoV-19/Mexico/CMX-INER-0089/2020         | EPI_ISL_837687  | 07/05/2020 | Mexico City     | Human | Female  | 61      | Deceased     | Original | Oropharyngeal swab  |
| hCoV-19/Mexico/CMX-INER-0090/2020         | EPI_ISL_837688  | 08/05/2020 | Mexico City     | Human | Male    | 26      | Released     | Original | Oropharyngeal swab  |
| hCoV-19/Mexico/CMX-INER-0091/2020         | EPI_ISL_837689  | 08/05/2020 | Mexico City     | Human | Male    | 34      | Released     | Original | Oropharyngeal swab  |
| hCoV-19/Mexico/CMX-INER-0092/2020         | EPI_ISL_837690  | 09/05/2020 | Mexico City     | Human | Female  | 45      | Deceased     | Original | Nasopharyngeal swab |
| hCoV-19/Mexico/CMX-INER-0093/2020         | EPI_ISL_837691  | 10/05/2020 | Mexico City     | Human | Female  | 46      | Hospitalized | Original | Tracheal aspirate   |
| hCoV-19/Mexico/CMX-INER-0094/2020         | EPI_ISL_837692  | 11/05/2020 | Mexico City     | Human | Male    | 49      | Released     | Original | Oropharyngeal swab  |
| hCoV-19/Mexico/CMX-INER-0095/2020         | EPI_ISL_837693  | 11/05/2020 | Mexico City     | Human | Female  | 44      | Deceased     | Original | Nasopharyngeal swab |
| hCoV-19/Mexico/BCN-ALSR-8341/2020         | EPI_ISL_1531807 | 12/05/2020 | Baja California | Human | unknown | unknown | unknown      | Original | Nasal swab          |
| hCoV-19/Mexico/BCN-ALSR-8342/2020         | EPI_ISL_1531808 | 12/05/2020 | Baja California | Human | unknown | unknown | unknown      | Original | Nasal swab          |
| hCoV-19/Mexico/BCN-ALSR-2444/2020         | EPI_ISL_635479  | 13/05/2020 | Baja California | Human | unknown | unknown | unknown      | Original | Nasopharyngeal swab |
| hCoV-19/Mexico/CMX-INER-0096/2020         | EPI_ISL_837694  | 13/05/2020 | Mexico City     | Human | Female  | 72      | Deceased     | Original | Nasopharyngeal swab |
| hCoV-19/Mexico/CMX-INMEGEN-02-10-17-GRO/2 | EPI_ISL_1158060 | 14/05/2020 | Mexico City     | Human | Female  | 37      | unknown      | Original | Oropharyngeal swab  |
| hCoV-19/Mexico/BCN-ALSR-2446/2020         | EPI_ISL_635480  | 14/05/2020 | Baja California | Human | unknown | unknown | unknown      | Original | Nasopharyngeal swab |
| hCoV-19/Mexico/BCN-ALSR-2447/2020         | EPI_ISL_635481  | 14/05/2020 | Baja California | Human | unknown | unknown | unknown      | Original | Nasopharyngeal swab |
| hCoV-19/Mexico/BCN-ALSR-2448/2020         | EPI_ISL_635482  | 14/05/2020 | Baja California | Human | unknown | unknown | unknown      | Original | Nasopharyngeal swab |
| hCoV-19/Mexico/CMX-INER-0097/2020         | EPI_ISL_837695  | 14/05/2020 | Mexico City     | Human | Female  | 39      | Hospitalized | Original | Nasopharyngeal swab |
| hCoV-19/Mexico/CMX-INER-0098/2020         | EPI_ISL_837696  | 14/05/2020 | Mexico City     | Human | Male    | 71      | Deceased     | Original | Nasopharyngeal swab |
| hCoV-19/Mexico/CMX-INER-0099/2020         | EPI_ISL_837697  | 14/05/2020 | Mexico City     | Human | Male    | 32      | Released     | Original | Oropharyngeal swab  |
| hCoV-19/Mexico/BCN-ALSR-8343/2020         | EPI_ISL_1531809 | 14/05/2020 | Baja California | Human | unknown | unknown | unknown      | Original | Nasal swab          |
| hCoV-19/Mexico/BCN-ALSR-8344/2020         | EPI_ISL_1531810 | 14/05/2020 | Baja California | Human | unknown | unknown | unknown      | Original | Nasal swab          |
| hCoV-19/Mexico/BCN-ALSR-2451/2020         | EPI_ISL_635483  | 15/05/2020 | Baja California | Human | unknown | unknown | unknown      | Original | Nasopharyngeal swab |
| hCoV-19/Mexico/BCN-ALSR-2452/2020         | EPI_ISL_635484  | 15/05/2020 | Baja California | Human | unknown | unknown | unknown      | Original | Nasopharyngeal swab |
| hCoV-19/Mexico/CMX-INER-0100/2020         | EPI_ISL_837698  | 15/05/2020 | Mexico City     | Human | Male    | unknown | unknown      | Original | Nasopharyngeal swab |
| hCoV-19/Mexico/SON-InDRE_35/2020          | EPI_ISL_516622  | 15/05/2020 | Sonora          | Human | Male    | 20      | Released     | Original | Oropharyngeal swab  |
| hCoV-19/Mexico/SON-InDRE_29/2020          | EPI_ISL_493344  | 15/05/2020 | Sonora          | Human | Male    | 61      | Released     | Original | Oropharyngeal swab  |
| hCoV-19/Mexico/BCN-ALSR-8345/2020         | EPI_ISL_1531811 | 15/05/2020 | Baja California | Human | unknown | unknown | unknown      | Original | Nasal swab          |

|                                           |                 |            |                     |       |         |         |              |          |                     |
|-------------------------------------------|-----------------|------------|---------------------|-------|---------|---------|--------------|----------|---------------------|
| hCoV-19/Mexico/BCN-ALSR-2457/2020         | EPI_ISL_635485  | 16/05/2020 | Baja California     | Human | unknown | unknown | unknown      | Original | Nasopharyngeal swab |
| hCoV-19/Mexico/BCN-ALSR-8346/2020         | EPI_ISL_1531812 | 16/05/2020 | Baja California     | Human | unknown | unknown | unknown      | Original | Nasal swab          |
| hCoV-19/Mexico/BCN-ALSR-8347/2020         | EPI_ISL_1531813 | 16/05/2020 | Baja California     | Human | unknown | unknown | unknown      | Original | Nasal swab          |
| hCoV-19/Mexico/BCN-ALSR-8348/2020         | EPI_ISL_1531814 | 16/05/2020 | Baja California     | Human | unknown | unknown | unknown      | Original | Nasal swab          |
| hCoV-19/Mexico/BCN-ALSR-8349/2020         | EPI_ISL_1531815 | 16/05/2020 | Baja California     | Human | unknown | unknown | unknown      | Original | Nasal swab          |
| hCoV-19/Mexico/CMX-INMEGEN-02-10-18-GRO/2 | EPI_ISL_1158061 | 17/05/2020 | Mexico City         | Human | Female  | 99      | unknown      | Original | Oropharyngeal swab  |
| hCoV-19/Mexico/CMX-INER-0101/2020         | EPI_ISL_837699  | 18/05/2020 | Mexico City         | Human | Female  | 53      | Released     | Original | Oropharyngeal swab  |
| hCoV-19/Mexico/CMX-INER-0102/2020         | EPI_ISL_837700  | 18/05/2020 | Mexico City         | Human | Male    | 57      | Deceased     | Original | Nasopharyngeal swab |
| hCoV-19/Mexico/NLE-UANL-006/2020          | EPI_ISL_779173  | 18/05/2020 | Nuevo Leon          | Human | Male    | 68      | unknown      | Original |                     |
| hCoV-19/Mexico/BCN-ALSR-2462/2020         | EPI_ISL_635486  | 19/05/2020 | Baja California     | Human | unknown | unknown | unknown      | Original | Nasopharyngeal swab |
| hCoV-19/Mexico/BCN-ALSR-2466/2020         | EPI_ISL_635487  | 19/05/2020 | Baja California     | Human | unknown | unknown | unknown      | Original | Nasopharyngeal swab |
| hCoV-19/Mexico/CMX-INER-0103/2020         | EPI_ISL_837701  | 19/05/2020 | Mexico City         | Human | Male    | 38      | Released     | Original | Oropharyngeal swab  |
| hCoV-19/Mexico/CMX-INER-0104/2020         | EPI_ISL_837702  | 19/05/2020 | Mexico City         | Human | Female  | 53      | Released     | Original | Oropharyngeal swab  |
| hCoV-19/Mexico/CMX-INER-0105/2020         | EPI_ISL_837703  | 19/05/2020 | Mexico City         | Human | Male    | 46      | Deceased     | Original | Nasopharyngeal swab |
| hCoV-19/Mexico/CMX-INMEGEN-02-10-19-GRO/2 | EPI_ISL_1137475 | 19/05/2020 | Mexico City         | Human | Male    | 37      | unknown      | Original | Oropharyngeal swab  |
| hCoV-19/Mexico/NLE-UANL-007/2020          | EPI_ISL_779174  | 19/05/2020 | Nuevo Leon          | Human | Female  | 28      | unknown      | Original |                     |
| hCoV-19/Mexico/NLE-UANL-008/2020          | EPI_ISL_779175  | 19/05/2020 | Nuevo Leon          | Human | Male    | 65      | unknown      | Original |                     |
| hCoV-19/Mexico/NLE-UANL-009/2020          | EPI_ISL_779176  | 19/05/2020 | Nuevo Leon          | Human | Female  | 21      | unknown      | Original |                     |
| hCoV-19/Mexico/BCN-ALSR-2468/2020         | EPI_ISL_635488  | 20/05/2020 | Baja California     | Human | unknown | unknown | unknown      | Original | Nasopharyngeal swab |
| hCoV-19/Mexico/CMX-INER-0106/2020         | EPI_ISL_837704  | 20/05/2020 | Mexico City         | Human | Female  | 28      | Hospitalized | Original | Oropharyngeal swab  |
| hCoV-19/Mexico/CMX-INER-0107/2020         | EPI_ISL_837705  | 20/05/2020 | Mexico City         | Human | Male    | 74      | Deceased     | Original | Nasopharyngeal swab |
| hCoV-19/Mexico/CMX-INER-0108/2020         | EPI_ISL_837706  | 20/05/2020 | Mexico City         | Human | Male    | 67      | Hospitalized | Original | Nasopharyngeal swab |
| hCoV-19/Mexico/SLP-UASLP-AH1COV2SS025_S   | EPI_ISL_1494717 | 20/05/2020 | San Luis Potosi     | Human | Male    | 42      | Hospitalized | Original |                     |
| hCoV-19/Mexico/CMX-INER-0109/2020         | EPI_ISL_837707  | 21/05/2020 | Mexico City         | Human | Female  | 38      | Released     | Original | Oropharyngeal swab  |
| hCoV-19/Mexico/CMX-INER-0110/2020         | EPI_ISL_837708  | 21/05/2020 | Mexico City         | Human | Male    | 53      | Hospitalized | Original | Nasopharyngeal swab |
| hCoV-19/Mexico/BCN-ALSR-2475/2020         | EPI_ISL_635489  | 22/05/2020 | Baja California     | Human | unknown | unknown | unknown      | Original | Nasopharyngeal swab |
| hCoV-19/Mexico/BCN-ALSR-2477/2020         | EPI_ISL_635490  | 22/05/2020 | Baja California     | Human | unknown | unknown | unknown      | Original | Nasopharyngeal swab |
| hCoV-19/Mexico/SLP-UASLP-AH1COV2SS027_S   | EPI_ISL_1494725 | 22/05/2020 | San Luis Potosi     | Human | Male    | 60      | Hospitalized | Original |                     |
| hCoV-19/Mexico/BCN-InDRE_32/2020          | EPI_ISL_493347  | 22/05/2020 | Baja California     | Human | Female  | 9       | Released     | Original | Oropharyngeal swab  |
| hCoV-19/Mexico/NLE-UANL-2098/2020         | EPI_ISL_648602  | 23/05/2020 | Nuevo Leon          | Human | Male    | 53      | unknown      | Original |                     |
| hCoV-19/Mexico/NLE-UANL-2088/2020         | EPI_ISL_648603  | 23/05/2020 | Nuevo Leon          | Human | Male    | 44      | unknown      | Original |                     |
| hCoV-19/Mexico/CMX-INER-0111/2020         | EPI_ISL_837709  | 23/05/2020 | Mexico City         | Human | Female  | 25      | Released     | Original | Oropharyngeal swab  |
| hCoV-19/Mexico/CMX-INER-0112/2020         | EPI_ISL_837710  | 23/05/2020 | Mexico City         | Human | Male    | 35      | Hospitalized | Original | Tracheal aspirate   |
| hCoV-19/Mexico/NLE-UANL-050/2020          | EPI_ISL_961791  | 23/05/2020 | Nuevo Leon          | Human | Male    | 44      | Hospitalized | Original |                     |
| hCoV-19/Mexico/NLE-UANL-049/2020          | EPI_ISL_961792  | 23/05/2020 | Nuevo Leon          | Human | Female  | 26      | Hospitalized | Original |                     |
| hCoV-19/Mexico/BCS-InDRE-25/2020          | EPI_ISL_493340  | 23/05/2020 | Baja California Sur | Human | Male    | 47      | Deceased     | Original | Oropharyngeal swab  |
| hCoV-19/Mexico/NLE-UANL-012/2020          | EPI_ISL_779177  | 23/05/2020 | Nuevo Leon          | Human | Female  | 21      | unknown      | Original |                     |
| hCoV-19/Mexico/NLE-UANL-013/2020          | EPI_ISL_779178  | 23/05/2020 | Nuevo Leon          | Human | Female  | 42      | unknown      | Original |                     |
| hCoV-19/Mexico/CMX-INER-0113/2020         | EPI_ISL_837711  | 24/05/2020 | Mexico City         | Human | Male    | 48      | Released     | Original | Oropharyngeal swab  |
| hCoV-19/Mexico/CMX-INER-0114/2020         | EPI_ISL_837712  | 25/05/2020 | Mexico City         | Human | Male    | 34      | Released     | Original | Oropharyngeal swab  |
| hCoV-19/Mexico/CMX-INER-0115/2020         | EPI_ISL_837713  | 25/05/2020 | Mexico City         | Human | Female  | 49      | Released     | Original | Oropharyngeal swab  |

|                                           |                 |            |                     |       |         |         |              |          |                     |
|-------------------------------------------|-----------------|------------|---------------------|-------|---------|---------|--------------|----------|---------------------|
| hCoV-19/Mexico/CMX-INMEGEN-02-10-20-GRO/2 | EPI_ISL_1158062 | 26/05/2020 | Mexico City         | Human | Male    | 21      | unknown      | Original | Oropharyngeal swab  |
| hCoV-19/Mexico/BCN-ALSR-2479/2020         | EPI_ISL_635491  | 26/05/2020 | Baja California     | Human | unknown | unknown | unknown      | Original | Nasopharyngeal swab |
| hCoV-19/Mexico/BCN-ALSR-2480/2020         | EPI_ISL_635492  | 26/05/2020 | Baja California     | Human | unknown | unknown | unknown      | Original | Nasopharyngeal swab |
| hCoV-19/Mexico/BCN-ALSR-2481/2020         | EPI_ISL_635493  | 26/05/2020 | Baja California     | Human | unknown | unknown | unknown      | Original | Nasopharyngeal swab |
| hCoV-19/Mexico/BCN-ALSR-2483/2020         | EPI_ISL_635494  | 26/05/2020 | Baja California     | Human | unknown | unknown | unknown      | Original | Nasopharyngeal swab |
| hCoV-19/Mexico/BCN-ALSR-2484/2020         | EPI_ISL_635495  | 26/05/2020 | Baja California     | Human | unknown | unknown | unknown      | Original | Nasopharyngeal swab |
| hCoV-19/Mexico/BCN-ALSR-2485/2020         | EPI_ISL_635496  | 26/05/2020 | Baja California     | Human | unknown | unknown | unknown      | Original | Nasopharyngeal swab |
| hCoV-19/Mexico/BCN-ALSR-2487/2020         | EPI_ISL_635497  | 26/05/2020 | Baja California     | Human | unknown | unknown | unknown      | Original | Nasopharyngeal swab |
| hCoV-19/Mexico/SLP-UASLP-AH1COV2SS028_S   | EPI_ISL_1494726 | 26/05/2020 | San Luis Potosi     | Human | Male    | 96      | Hospitalized | Original |                     |
| hCoV-19/Mexico/SLP-UASLP-AH1COV2SS029_S   | EPI_ISL_1494727 | 26/05/2020 | San Luis Potosi     | Human | Male    | 40      | Released     | Original |                     |
| hCoV-19/Mexico/NAY-InDRE_27/2020          | EPI_ISL_493342  | 26/05/2020 | Nayarit             | Human | Female  | 50      | Released     | Original | Oropharyngeal swab  |
| hCoV-19/Mexico/BCS-InDRE_31/2020          | EPI_ISL_493346  | 26/05/2020 | Baja California Sur | Human | Male    | 20      | Deceased     | Original | Oropharyngeal swab  |
| hCoV-19/Mexico/CMX-INER-0117/2020         | EPI_ISL_837714  | 27/05/2020 | Mexico City         | Human | Female  | unknown | unknown      | Original | Oropharyngeal swab  |
| hCoV-19/Mexico/CMX-INER-0118/2020         | EPI_ISL_837715  | 27/05/2020 | Mexico City         | Human | Female  | 40      | Released     | Original | Oropharyngeal swab  |
| hCoV-19/Mexico/JAL-UANL-001/2020          | EPI_ISL_1092361 | 27/05/2020 | Jalisco             | Human | Female  | 54      | unknown      | Original |                     |
| hCoV-19/Mexico/CMX-INER-0116/2020         | EPI_ISL_843191  | 27/05/2020 | Mexico City         | Human | Female  | 42      | Released     | Original | Oropharyngeal swab  |
| hCoV-19/Mexico/MOR-InDRE-26/2020          | EPI_ISL_493341  | 27/05/2020 | Morelos             | Human | Male    | 29      | Released     | Original | Oropharyngeal swab  |
| hCoV-19/Mexico/YUC-InDRE_33/2020          | EPI_ISL_493348  | 27/05/2020 | Yucatan             | Human | Male    | 92      | Deceased     | Original | Oropharyngeal swab  |
| hCoV-19/Mexico/BCN-ALSR-3634/2020         | EPI_ISL_636118  | 27/05/2020 | Baja California     | Human | unknown | unknown | unknown      | Original | Nasopharyngeal swab |
| hCoV-19/Mexico/CMX-INER-0119/2020         | EPI_ISL_837716  | 28/05/2020 | Mexico City         | Human | Male    | 48      | Released     | Original | Oropharyngeal swab  |
| hCoV-19/Mexico/CMX-INER-0120/2020         | EPI_ISL_837717  | 28/05/2020 | Mexico City         | Human | Female  | 27      | Hospitalized | Original | Oropharyngeal swab  |
| hCoV-19/Mexico/SON-InDRE_34/2020          | EPI_ISL_493349  | 28/05/2020 | Sonora              | Human | Male    | 83      | Live         | Original | Oropharyngeal swab  |
| hCoV-19/Mexico/BCN-ALSR-3636/2020         | EPI_ISL_636119  | 28/05/2020 | Baja California     | Human | unknown | unknown | unknown      | Original | Nasopharyngeal swab |
| hCoV-19/Mexico/BCN-ALSR-2489/2020         | EPI_ISL_635498  | 29/05/2020 | Baja California     | Human | unknown | unknown | unknown      | Original | Nasopharyngeal swab |
| hCoV-19/Mexico/BCN-ALSR-2490/2020         | EPI_ISL_635499  | 29/05/2020 | Baja California     | Human | unknown | unknown | unknown      | Original | Nasopharyngeal swab |
| hCoV-19/Mexico/CMX-INER-0121/2020         | EPI_ISL_837718  | 29/05/2020 | Mexico City         | Human | Female  | 54      | Hospitalized | Original | Oropharyngeal swab  |
| hCoV-19/Mexico/CMX-INER-0122/2020         | EPI_ISL_837719  | 29/05/2020 | Mexico City         | Human | Male    | 60      | Hospitalized | Original | Nasopharyngeal swab |
| hCoV-19/Mexico/CMX-INER-0123/2020         | EPI_ISL_837720  | 29/05/2020 | Mexico City         | Human | Female  | 25      | Released     | Original | Oropharyngeal swab  |
| hCoV-19/Mexico/CMX-INER-0124/2020         | EPI_ISL_837721  | 29/05/2020 | Mexico City         | Human | Male    | 34      | Released     | Original | Oropharyngeal swab  |
| hCoV-19/Mexico/CMX-INER-0125/2020         | EPI_ISL_837722  | 29/05/2020 | Mexico City         | Human | Female  | 53      | Hospitalized | Original | Nasopharyngeal swab |
| hCoV-19/Mexico/NAY-InDRE_28/2020          | EPI_ISL_493343  | 29/05/2020 | Nayarit             | Human | Male    | 72      | Released     | Original | Oropharyngeal swab  |
| hCoV-19/Mexico/BCS-InDRE_30/2020          | EPI_ISL_493345  | 29/05/2020 | Baja California Sur | Human | Female  | 73      | Released     | Original | Oropharyngeal swab  |
| hCoV-19/Mexico/BCN-ALSR-3622/2020         | EPI_ISL_636115  | 29/05/2020 | Baja California     | Human | unknown | unknown | unknown      | Original | Nasopharyngeal swab |
| hCoV-19/Mexico/BCN-ALSR-2491/2020         | EPI_ISL_635500  | 29/05/2020 | Baja California     | Human | unknown | unknown | unknown      | Original | Nasopharyngeal swab |
| hCoV-19/Mexico/BCN-ALSR-2492/2020         | EPI_ISL_635501  | 29/05/2020 | Baja California     | Human | unknown | unknown | unknown      | Original | Nasopharyngeal swab |
| hCoV-19/Mexico/BCN-ALSR-2493/2020         | EPI_ISL_635502  | 29/05/2020 | Baja California     | Human | unknown | unknown | unknown      | Original | Nasopharyngeal swab |
| hCoV-19/Mexico/BCN-ALSR-2494/2020         | EPI_ISL_635503  | 29/05/2020 | Baja California     | Human | unknown | unknown | unknown      | Original | Nasopharyngeal swab |
| hCoV-19/Mexico/CMX-INER-0126/2020         | EPI_ISL_837723  | 30/05/2020 | Mexico City         | Human | Female  | 23      | Released     | Original | Oropharyngeal swab  |
| hCoV-19/Mexico/BCN-ALSR-2495/2020         | EPI_ISL_635504  | 30/05/2020 | Baja California     | Human | unknown | unknown | unknown      | Original | Nasopharyngeal swab |
| hCoV-19/Mexico/BCN-ALSR-2496/2020         | EPI_ISL_635505  | 30/05/2020 | Baja California     | Human | unknown | unknown | unknown      | Original | Nasopharyngeal swab |
| hCoV-19/Mexico/CMX-INER-0127/2020         | EPI_ISL_837724  | 31/05/2020 | Mexico City         | Human | Male    | 57      | Deceased     | Original | Nasopharyngeal swab |



|                                   |                 |            |                 |       |         |         |              |          |                     |
|-----------------------------------|-----------------|------------|-----------------|-------|---------|---------|--------------|----------|---------------------|
| hCoV-19/Mexico/CMX-INER-0128/2020 | EPI_ISL_837725  | 31/05/2020 | Mexico City     | Human | Male    | 105     | Deceased     | Original | Nasopharyngeal swab |
| hCoV-19/Mexico/BCN-ALSR-2497/2020 | EPI_ISL_635506  | 01/06/2020 | Baja California | Human | unknown | unknown | unknown      | Original | Nasopharyngeal swab |
| hCoV-19/Mexico/BCN-ALSR-2499/2020 | EPI_ISL_635507  | 01/06/2020 | Baja California | Human | unknown | unknown | unknown      | Original | Nasopharyngeal swab |
| hCoV-19/Mexico/CMX-INER-0129/2020 | EPI_ISL_837726  | 02/06/2020 | Mexico City     | Human | Male    | 23      | Released     | Original | Oropharyngeal swab  |
| hCoV-19/Mexico/JAL-UANL-002/2020  | EPI_ISL_1091261 | 03/06/2020 | Jalisco         | Human | Female  | 85      | unknown      | Original |                     |
| hCoV-19/Mexico/CMX-INER-0130/2020 | EPI_ISL_837727  | 03/06/2020 | Mexico City     | Human | Male    | 80      | Deceased     | Original | Oropharyngeal swab  |
| hCoV-19/Mexico/BCN-ALSR-3618/2020 | EPI_ISL_636113  | 03/06/2020 | Baja California | Human | unknown | unknown | unknown      | Original | Nasopharyngeal swab |
| hCoV-19/Mexico/BCN-ALSR-2500/2020 | EPI_ISL_635508  | 03/06/2020 | Baja California | Human | unknown | unknown | unknown      | Original | Nasopharyngeal swab |
| hCoV-19/Mexico/BCN-ALSR-2502/2020 | EPI_ISL_635509  | 03/06/2020 | Baja California | Human | unknown | unknown | unknown      | Original | Nasopharyngeal swab |
| hCoV-19/Mexico/CMX-INER-0131/2020 | EPI_ISL_837728  | 04/06/2020 | Mexico City     | Human | Male    | 32      | Released     | Original | Oropharyngeal swab  |
| hCoV-19/Mexico/BCN-ALSR-3619/2020 | EPI_ISL_636114  | 04/06/2020 | Baja California | Human | unknown | unknown | unknown      | Original | Nasopharyngeal swab |
| hCoV-19/Mexico/BCN-ALSR-2504/2020 | EPI_ISL_635510  | 05/06/2020 | Baja California | Human | unknown | unknown | unknown      | Original | Nasopharyngeal swab |
| hCoV-19/Mexico/CMX-INER-0132/2020 | EPI_ISL_837729  | 06/06/2020 | Mexico City     | Human | Female  | 47      | Hospitalized | Original | Oropharyngeal swab  |
| hCoV-19/Mexico/CMX-INER-0133/2020 | EPI_ISL_837730  | 06/06/2020 | Mexico City     | Human | Male    | 43      | Deceased     | Original | Nasopharyngeal swab |
| hCoV-19/Mexico/SON-InDRE_42/2020  | EPI_ISL_516623  | 06/06/2020 | Sonora          | Human | Male    | 35      | Deceased     | Original | Oropharyngeal swab  |
| hCoV-19/Mexico/BCN-ALSR-2506/2020 | EPI_ISL_635511  | 06/06/2020 | Baja California | Human | unknown | unknown | unknown      | Original | Nasopharyngeal swab |
| hCoV-19/Mexico/GRO-InDRE-91/2020  | EPI_ISL_658896  | 08/06/2020 | Guerrero        | Human | Female  | 46      | Released     | Original | Oropharyngeal swab  |
| hCoV-19/Mexico/CMX-INER-0134/2020 | EPI_ISL_837731  | 08/06/2020 | Mexico City     | Human | Male    | 59      | Deceased     | Original | Tracheal aspirate   |
| hCoV-19/Mexico/BCN-ALSR-8351/2020 | EPI_ISL_1531816 | 08/06/2020 | Baja California | Human | unknown | unknown | unknown      | Original | Nasal swab          |
| hCoV-19/Mexico/BCN-ALSR-2507/2020 | EPI_ISL_635512  | 08/06/2020 | Baja California | Human | unknown | unknown | unknown      | Original | Nasopharyngeal swab |
| hCoV-19/Mexico/BCN-ALSR-2508/2020 | EPI_ISL_635513  | 08/06/2020 | Baja California | Human | unknown | unknown | unknown      | Original | Nasopharyngeal swab |
| hCoV-19/Mexico/BCN-ALSR-2509/2020 | EPI_ISL_635514  | 08/06/2020 | Baja California | Human | unknown | unknown | unknown      | Original | Nasopharyngeal swab |
| hCoV-19/Mexico/CMX-INER-0135/2020 | EPI_ISL_837732  | 09/06/2020 | Mexico City     | Human | Male    | 46      | Released     | Original | Oropharyngeal swab  |
| hCoV-19/Mexico/CMX-INER-0136/2020 | EPI_ISL_837733  | 09/06/2020 | Mexico City     | Human | Male    | 45      | Hospitalized | Original | Oropharyngeal swab  |
| hCoV-19/Mexico/CMX-INER-0137/2020 | EPI_ISL_837734  | 10/06/2020 | Mexico City     | Human | Female  | 51      | Released     | Original | Oropharyngeal swab  |
| hCoV-19/Mexico/BCN-ALSR-8352/2020 | EPI_ISL_1531817 | 10/06/2020 | Baja California | Human | unknown | unknown | unknown      | Original | Nasal swab          |
| hCoV-19/Mexico/BCN-ALSR-2510/2020 | EPI_ISL_635515  | 10/06/2020 | Baja California | Human | unknown | unknown | unknown      | Original | Nasopharyngeal swab |
| hCoV-19/Mexico/BCN-ALSR-3624/2020 | EPI_ISL_636116  | 12/06/2020 | Sonora          | Human | unknown | unknown | unknown      | Original | Nasopharyngeal swab |
| hCoV-19/Mexico/BCN-ALSR-3630/2020 | EPI_ISL_636117  | 12/06/2020 | Baja California | Human | unknown | unknown | unknown      | Original | Nasopharyngeal swab |
| hCoV-19/Mexico/BCN-ALSR-3639/2020 | EPI_ISL_636120  | 12/06/2020 | Sonora          | Human | unknown | unknown | unknown      | Original | Nasopharyngeal swab |
| hCoV-19/Mexico/BCN-ALSR-2511/2020 | EPI_ISL_635516  | 12/06/2020 | Baja California | Human | unknown | unknown | unknown      | Original | Nasopharyngeal swab |
| hCoV-19/Mexico/BCN-ALSR-2512/2020 | EPI_ISL_635517  | 12/06/2020 | Baja California | Human | unknown | unknown | unknown      | Original | Nasopharyngeal swab |
| hCoV-19/Mexico/COA-InDRE-36/2020  | EPI_ISL_516618  | 13/06/2020 | Coahuila        | Human | Male    | 51      | Released     | Original | Oropharyngeal swab  |
| hCoV-19/Mexico/COA-InDRE-37/2020  | EPI_ISL_516619  | 13/06/2020 | Coahuila        | Human | Female  | 32      | Released     | Original | Oropharyngeal swab  |
| hCoV-19/Mexico/CMX-INER-0138/2020 | EPI_ISL_837607  | 14/06/2020 | Mexico City     | Human | Female  | 53      | Released     | Original | Oropharyngeal swab  |
| hCoV-19/Mexico/CMX-INER-0139/2020 | EPI_ISL_837735  | 15/06/2020 | Mexico City     | Human | Female  | 32      | Released     | Original | Oropharyngeal swab  |
| hCoV-19/Mexico/TAM-InDRE_39/2020  | EPI_ISL_516625  | 15/06/2020 | Tamaulipas      | Human | Male    | 79      | Deceased     | Original | Oropharyngeal swab  |
| hCoV-19/Mexico/AGU-InDRE-55/2020  | EPI_ISL_576258  | 15/06/2020 | Aguascalientes  | Human | Female  | 67      | Released     | Original | Oropharyngeal swab  |
| hCoV-19/Mexico/BCN-ALSR-2513/2020 | EPI_ISL_635518  | 15/06/2020 | Baja California | Human | unknown | unknown | unknown      | Original | Nasopharyngeal swab |
| hCoV-19/Mexico/BCN-ALSR-2514/2020 | EPI_ISL_635519  | 15/06/2020 | Baja California | Human | unknown | unknown | unknown      | Original | Nasopharyngeal swab |
| hCoV-19/Mexico/BCN-ALSR-2515/2020 | EPI_ISL_635520  | 15/06/2020 | Baja California | Human | unknown | unknown | unknown      | Original | Nasopharyngeal swab |

|                                           |                 |            |                 |       |         |         |              |          |                                       |
|-------------------------------------------|-----------------|------------|-----------------|-------|---------|---------|--------------|----------|---------------------------------------|
| hCoV-19/Mexico/BCN-ALSR-2516/2020         | EPI_ISL_635521  | 15/06/2020 | Baja California | Human | unknown | unknown | unknown      | Original | Nasopharyngeal swab                   |
| hCoV-19/Mexico/BCN-ALSR-2517/2020         | EPI_ISL_635522  | 15/06/2020 | Baja California | Human | unknown | unknown | unknown      | Original | Nasopharyngeal swab                   |
| hCoV-19/Mexico/BCN-ALSR-2519/2020         | EPI_ISL_635523  | 15/06/2020 | Baja California | Human | unknown | unknown | unknown      | Original | Nasopharyngeal swab                   |
| hCoV-19/Mexico/CMX-INER-0140/2020         | EPI_ISL_837736  | 16/06/2020 | Mexico City     | Human | Male    | 59      | Hospitalized | Original | Nasopharyngeal swab                   |
| hCoV-19/Mexico/NLE-UANL-052/2020          | EPI_ISL_961785  | 16/06/2020 | Nuevo Leon      | Human | Male    | 24      | Hospitalized | Original |                                       |
| hCoV-19/Mexico/BCN-ALSR-2520/2020         | EPI_ISL_635524  | 16/06/2020 | Baja California | Human | unknown | unknown | unknown      | Original | Nasopharyngeal swab                   |
| hCoV-19/Mexico/BCN-ALSR-2521/2020         | EPI_ISL_635525  | 16/06/2020 | Baja California | Human | unknown | unknown | unknown      | Original | Nasopharyngeal swab                   |
| hCoV-19/Mexico/BCN-ALSR-2522/2020         | EPI_ISL_635526  | 16/06/2020 | Baja California | Human | unknown | unknown | unknown      | Original | Nasopharyngeal swab                   |
| hCoV-19/Mexico/BCN-ALSR-2523/2020         | EPI_ISL_635527  | 16/06/2020 | Baja California | Human | unknown | unknown | unknown      | Original | Nasopharyngeal swab                   |
| hCoV-19/Mexico/BCN-ALSR-2524/2020         | EPI_ISL_635528  | 16/06/2020 | Baja California | Human | unknown | unknown | unknown      | Original | Nasopharyngeal swab                   |
| hCoV-19/Mexico/NLE-UANL-4479/2020         | EPI_ISL_648607  | 17/06/2020 | Nuevo Leon      | Human | Male    | 56      | unknown      | Original |                                       |
| hCoV-19/Mexico/NLE-UANL-014/2020          | EPI_ISL_779179  | 17/06/2020 | Nuevo Leon      | Human | Female  | 56      | unknown      | Original |                                       |
| hCoV-19/Mexico/NLE-UANL-015/2020          | EPI_ISL_779180  | 17/06/2020 | Nuevo Leon      | Human | Male    | 33      | unknown      | Original |                                       |
| hCoV-19/Mexico/NLE-UANL-017/2020          | EPI_ISL_779181  | 17/06/2020 | Nuevo Leon      | Human | Female  | 33      | unknown      | Original |                                       |
| hCoV-19/Mexico/BCN-ALSR-2525/2020         | EPI_ISL_635529  | 17/06/2020 | Baja California | Human | unknown | unknown | unknown      | Original | Nasopharyngeal swab                   |
| hCoV-19/Mexico/BCN-ALSR-2526/2020         | EPI_ISL_635530  | 17/06/2020 | Baja California | Human | unknown | unknown | unknown      | Original | Nasopharyngeal swab                   |
| hCoV-19/Mexico/BCN-ALSR-2527/2020         | EPI_ISL_635531  | 17/06/2020 | Baja California | Human | unknown | unknown | unknown      | Original | Nasopharyngeal swab                   |
| hCoV-19/Mexico/CMX-INER-0141/2020         | EPI_ISL_837737  | 18/06/2020 | Mexico City     | Human | Male    | 29      | Hospitalized | Original | Nasopharyngeal swab                   |
| hCoV-19/Mexico/CMX-INER-0142/2020         | EPI_ISL_837738  | 18/06/2020 | Mexico City     | Human | Male    | 29      | Released     | Original |                                       |
| hCoV-19/Mexico/SIN_CIAD_S0148/2020        | EPI_ISL_1491365 | 18/06/2020 | Sinaloa         | Human | Male    | 2       | unknown      | Original | Oropharyngeal swab                    |
| hCoV-19/Mexico/BCN-ALSR-8353/2020         | EPI_ISL_1531818 | 18/06/2020 | Baja California | Human | unknown | unknown | unknown      | Original | Nasal swab                            |
| hCoV-19/Mexico/BCN-ALSR-8354/2020         | EPI_ISL_1531819 | 18/06/2020 | Baja California | Human | unknown | unknown | unknown      | Original | Nasal swab                            |
| hCoV-19/Mexico/BCN-ALSR-2528/2020         | EPI_ISL_635532  | 18/06/2020 | Baja California | Human | unknown | unknown | unknown      | Original | Nasopharyngeal swab                   |
| hCoV-19/Mexico/CMX-INER-0143/2020         | EPI_ISL_837739  | 19/06/2020 | Mexico City     | Human | Male    | 45      | Released     | Original | Oropharyngeal swab                    |
| hCoV-19/Mexico/CMX-INER-0144/2020         | EPI_ISL_837740  | 19/06/2020 | Mexico City     | Human | Male    | 44      | Released     | Original | Nasopharyngeal and oropharyngeal swab |
| hCoV-19/Mexico/COA-InDRE_40/2020          | EPI_ISL_516620  | 19/06/2020 | Coahuila        | Human | Female  | 24      | Released     | Original | Oropharyngeal swab                    |
| hCoV-19/Mexico/TAM-InDRE_38/2020          | EPI_ISL_516624  | 19/06/2020 | Tamaulipas      | Human | Male    | 49      | Released     | Original | Oropharyngeal swab                    |
| hCoV-19/Mexico/CMX-INMEGEN-02-10-21-GRO/2 | EPI_ISL_1137476 | 19/06/2020 | Mexico City     | Human | Female  | 25      | unknown      | Original | Oropharyngeal swab                    |
| hCoV-19/Mexico/NLE-UANL-053/2020          | EPI_ISL_961781  | 20/06/2020 | Nuevo Leon      | Human | Female  | 22      | Hospitalized | Original |                                       |
| hCoV-19/Mexico/CMX-INER-0145/2020         | EPI_ISL_837741  | 22/06/2020 | Mexico City     | Human | Female  | 81      | Hospitalized | Original | Nasopharyngeal swab                   |
| hCoV-19/Mexico/CMX-INER-0146/2020         | EPI_ISL_837742  | 22/06/2020 | Mexico City     | Human | Female  | 30      | Released     | Original | Oropharyngeal swab                    |
| hCoV-19/Mexico/BCN-ALSR-2529/2020         | EPI_ISL_635533  | 22/06/2020 | Baja California | Human | unknown | unknown | unknown      | Original | Nasopharyngeal swab                   |
| hCoV-19/Mexico/BCN-ALSR-2530/2020         | EPI_ISL_635534  | 22/06/2020 | Baja California | Human | unknown | unknown | unknown      | Original | Nasopharyngeal swab                   |
| hCoV-19/Mexico/BCN-ALSR-2531/2020         | EPI_ISL_635535  | 22/06/2020 | Baja California | Human | unknown | unknown | unknown      | Original | Nasopharyngeal swab                   |
| hCoV-19/Mexico/CMX-INER-0147/2020         | EPI_ISL_837743  | 23/06/2020 | Mexico City     | Human | Male    | 33      | Released     | Original | Nasopharyngeal swab                   |
| hCoV-19/Mexico/BCN-ALSR-2533/2020         | EPI_ISL_635536  | 23/06/2020 | Baja California | Human | unknown | unknown | unknown      | Original | Nasopharyngeal swab                   |
| hCoV-19/Mexico/BCN-ALSR-2534/2020         | EPI_ISL_635537  | 23/06/2020 | Baja California | Human | unknown | unknown | unknown      | Original | Nasopharyngeal swab                   |
| hCoV-19/Mexico/BCN-ALSR-2535/2020         | EPI_ISL_635538  | 23/06/2020 | Baja California | Human | unknown | unknown | unknown      | Original | Nasopharyngeal swab                   |
| hCoV-19/Mexico/BCN-ALSR-2536/2020         | EPI_ISL_635539  | 23/06/2020 | Baja California | Human | unknown | unknown | unknown      | Original | Nasopharyngeal swab                   |
| hCoV-19/Mexico/CMX-INER-0148/2020         | EPI_ISL_837744  | 24/06/2020 | Mexico City     | Human | Male    | unknown | unknown      | Original | Nasopharyngeal and oropharyngeal swab |
| hCoV-19/Mexico/CMX-INER-0149/2020         | EPI_ISL_837745  | 24/06/2020 | Mexico City     | Human | Male    | 48      | Released     | Original | Nasopharyngeal and oropharyngeal swab |

|                                   |                 |            |                 |       |         |         |              |          |                                       |
|-----------------------------------|-----------------|------------|-----------------|-------|---------|---------|--------------|----------|---------------------------------------|
| hCoV-19/Mexico/BCN-ALSR-8356/2020 | EPI_ISL_1531820 | 24/06/2020 | Baja California | Human | unknown | unknown | unknown      | Original | Nasal swab                            |
| hCoV-19/Mexico/BCN-ALSR-8357/2020 | EPI_ISL_1531821 | 24/06/2020 | Baja California | Human | unknown | unknown | unknown      | Original | Nasal swab                            |
| hCoV-19/Mexico/BCN-ALSR-2537/2020 | EPI_ISL_635540  | 24/06/2020 | Baja California | Human | unknown | unknown | unknown      | Original | Nasopharyngeal swab                   |
| hCoV-19/Mexico/BCN-ALSR-2538/2020 | EPI_ISL_635541  | 24/06/2020 | Baja California | Human | unknown | unknown | unknown      | Original | Nasopharyngeal swab                   |
| hCoV-19/Mexico/BCN-ALSR-2539/2020 | EPI_ISL_635542  | 24/06/2020 | Baja California | Human | unknown | unknown | unknown      | Original | Nasopharyngeal swab                   |
| hCoV-19/Mexico/BCN-ALSR-2540/2020 | EPI_ISL_635543  | 24/06/2020 | Baja California | Human | unknown | unknown | unknown      | Original | Nasopharyngeal swab                   |
| hCoV-19/Mexico/CMX-INER-0150/2020 | EPI_ISL_837746  | 25/06/2020 | Mexico City     | Human | Female  | 45      | Released     | Original | Nasopharyngeal and oropharyngeal swab |
| hCoV-19/Mexico/BCN-ALSR-2541/2020 | EPI_ISL_635544  | 25/06/2020 | Baja California | Human | unknown | unknown | unknown      | Original | Nasopharyngeal swab                   |
| hCoV-19/Mexico/BCN-ALSR-2542/2020 | EPI_ISL_635545  | 25/06/2020 | Baja California | Human | unknown | unknown | unknown      | Original | Nasopharyngeal swab                   |
| hCoV-19/Mexico/BCN-ALSR-2543/2020 | EPI_ISL_635546  | 25/06/2020 | Baja California | Human | unknown | unknown | unknown      | Original | Nasopharyngeal swab                   |
| hCoV-19/Mexico/BC-InDRE-44/2020   | EPI_ISL_516608  | 26/06/2020 | Baja California | Human | Male    | 33      | Released     | Original | Oropharyngeal swab                    |
| hCoV-19/Mexico/CHH-InDRE-43/2020  | EPI_ISL_516613  | 26/06/2020 | Chihuahua       | Human | Female  | 22      | Released     | Original | Oropharyngeal swab                    |
| hCoV-19/Mexico/BCN-ALSR-2544/2020 | EPI_ISL_635547  | 26/06/2020 | Baja California | Human | unknown | unknown | unknown      | Original | Nasopharyngeal swab                   |
| hCoV-19/Mexico/TAM-UANL-013/2020  | EPI_ISL_1091272 | 27/06/2020 | Tamaulipas      | Human | Male    | 25      | unknown      | Original |                                       |
| hCoV-19/Mexico/CMX-INER-0151/2020 | EPI_ISL_837747  | 27/06/2020 | Mexico City     | Human | Male    | 48      | Released     | Original | Nasopharyngeal and oropharyngeal swab |
| hCoV-19/Mexico/CMX-INER-0152/2020 | EPI_ISL_837748  | 27/06/2020 | Mexico City     | Human | Male    | 64      | Deceased     | Original | Nasopharyngeal and oropharyngeal swab |
| hCoV-19/Mexico/BCN-InDRE-45/2020  | EPI_ISL_516609  | 27/06/2020 | Baja California | Human | Male    | 41      | Released     | Original | Oropharyngeal swab                    |
| hCoV-19/Mexico/CHH-InDRE-47/2020  | EPI_ISL_516615  | 27/06/2020 | Chihuahua       | Human | Male    | 29      | Released     | Original | Oropharyngeal swab                    |
| hCoV-19/Mexico/NLE-UANL-062/2020  | EPI_ISL_961780  | 27/06/2020 | Nuevo Leon      | Human | Male    | 58      | Hospitalized | Original |                                       |
| hCoV-19/Mexico/BCN-ALSR-2545/2020 | EPI_ISL_635548  | 27/06/2020 | Baja California | Human | unknown | unknown | unknown      | Original | Nasopharyngeal swab                   |
| hCoV-19/Mexico/CHH-InDRE-46/2020  | EPI_ISL_516614  | 28/06/2020 | Chihuahua       | Human | Male    | 63      | Released     | Original | Oropharyngeal swab                    |
| hCoV-19/Mexico/BCN-ALSR-2546/2020 | EPI_ISL_635549  | 29/06/2020 | Baja California | Human | unknown | unknown | unknown      | Original | Nasopharyngeal swab                   |
| hCoV-19/Mexico/BCN-ALSR-2547/2020 | EPI_ISL_635550  | 29/06/2020 | Baja California | Human | unknown | unknown | unknown      | Original | Nasopharyngeal swab                   |
| hCoV-19/Mexico/CMX-INER-0153/2020 | EPI_ISL_837749  | 30/06/2020 | Mexico City     | Human | Male    | 56      | Hospitalized | Original | Nasopharyngeal and oropharyngeal swab |
| hCoV-19/Mexico/BCN-InDRE-50/2020  | EPI_ISL_516610  | 30/06/2020 | Baja California | Human | Male    | 25      | Released     | Original | Oropharyngeal swab                    |
| hCoV-19/Mexico/CHH-InDRE-48/2020  | EPI_ISL_516616  | 30/06/2020 | Chihuahua       | Human | Female  | 52      | Released     | Original | Oropharyngeal swab                    |
| hCoV-19/Mexico/BCN-ALSR-8358/2020 | EPI_ISL_1531822 | 30/06/2020 | Baja California | Human | unknown | unknown | unknown      | Original | Nasal swab                            |
| hCoV-19/Mexico/BCN-ALSR-2548/2020 | EPI_ISL_635551  | 30/06/2020 | Baja California | Human | unknown | unknown | unknown      | Original | Nasopharyngeal swab                   |
| hCoV-19/Mexico/CMX-INER-0154/2020 | EPI_ISL_837750  | 01/07/2020 | Mexico City     | Human | Female  | 61      | Released     | Original | Nasopharyngeal swab                   |
| hCoV-19/Mexico/CHH-InDRE-49/2020  | EPI_ISL_516617  | 01/07/2020 | Chihuahua       | Human | Female  | 49      | Released     | Original | Oropharyngeal swab                    |
| hCoV-19/Mexico/BCN-ALSR-2549/2020 | EPI_ISL_635552  | 01/07/2020 | Baja California | Human | unknown | unknown | unknown      | Original | Nasopharyngeal swab                   |
| hCoV-19/Mexico/BCN-ALSR-2550/2020 | EPI_ISL_635553  | 01/07/2020 | Baja California | Human | unknown | unknown | unknown      | Original | Nasopharyngeal swab                   |
| hCoV-19/Mexico/BCN-ALSR-2551/2020 | EPI_ISL_635554  | 01/07/2020 | Baja California | Human | unknown | unknown | unknown      | Original | Nasopharyngeal swab                   |
| hCoV-19/Mexico/CMX-INER-0155/2020 | EPI_ISL_837751  | 02/07/2020 | Mexico City     | Human | Female  | 21      | Released     | Original | Oropharyngeal swab                    |
| hCoV-19/Mexico/CMX-INER-0156/2020 | EPI_ISL_837752  | 02/07/2020 | Mexico City     | Human | Male    | unknown | unknown      | Original | Nasopharyngeal and oropharyngeal swab |
| hCoV-19/Mexico/NLE-UANL-054/2020  | EPI_ISL_961777  | 02/07/2020 | Nuevo Leon      | Human | Male    | 31      | Hospitalized | Original |                                       |
| hCoV-19/Mexico/BCN-ALSR-2552/2020 | EPI_ISL_635555  | 02/07/2020 | Baja California | Human | unknown | unknown | unknown      | Original | Nasopharyngeal swab                   |
| hCoV-19/Mexico/BCN-ALSR-2553/2020 | EPI_ISL_635556  | 02/07/2020 | Baja California | Human | unknown | unknown | unknown      | Original | Nasopharyngeal swab                   |
| hCoV-19/Mexico/BCN-ALSR-4888/2020 | EPI_ISL_730197  | 03/07/2020 | Baja California | Human | unknown | unknown | unknown      | Original | Nasopharyngeal swab                   |
| hCoV-19/Mexico/CMX-INER-0157/2020 | EPI_ISL_837753  | 03/07/2020 | Mexico City     | Human | Male    | 36      | Deceased     | Original | Nasopharyngeal and oropharyngeal swab |
| hCoV-19/Mexico/CMX-INER-0158/2020 | EPI_ISL_837754  | 03/07/2020 | Mexico City     | Human | Female  | 29      | Hospitalized | Original | Oropharyngeal swab                    |

|                                   |                 |            |                 |       |         |         |              |          |                                       |
|-----------------------------------|-----------------|------------|-----------------|-------|---------|---------|--------------|----------|---------------------------------------|
| hCoV-19/Mexico/BCN-ALSR-8360/2020 | EPI_ISL_1531824 | 03/07/2020 | Baja California | Human | unknown | unknown | unknown      | Original | Nasal swab                            |
| hCoV-19/Mexico/BCN-ALSR-2554/2020 | EPI_ISL_635557  | 03/07/2020 | Baja California | Human | unknown | unknown | unknown      | Original | Nasopharyngeal swab                   |
| hCoV-19/Mexico/BCN-ALSR-2555/2020 | EPI_ISL_635558  | 03/07/2020 | Baja California | Human | unknown | unknown | unknown      | Original | Nasopharyngeal swab                   |
| hCoV-19/Mexico/BCN-ALSR-4893/2020 | EPI_ISL_730198  | 04/07/2020 | Baja California | Human | unknown | unknown | unknown      | Original | Nasopharyngeal swab                   |
| hCoV-19/Mexico/BCN-ALSR-4894/2020 | EPI_ISL_730199  | 04/07/2020 | Baja California | Human | unknown | unknown | unknown      | Original | Nasopharyngeal swab                   |
| hCoV-19/Mexico/BCN-ALSR-2556/2020 | EPI_ISL_635559  | 04/07/2020 | Baja California | Human | unknown | unknown | unknown      | Original | Nasopharyngeal swab                   |
| hCoV-19/Mexico/BCN-ALSR-2557/2020 | EPI_ISL_635560  | 04/07/2020 | Baja California | Human | unknown | unknown | unknown      | Original | Nasopharyngeal swab                   |
| hCoV-19/Mexico/BCN-ALSR-2558/2020 | EPI_ISL_635561  | 04/07/2020 | Baja California | Human | unknown | unknown | unknown      | Original | Nasopharyngeal swab                   |
| hCoV-19/Mexico/BCN-ALSR-2559/2020 | EPI_ISL_635562  | 04/07/2020 | Baja California | Human | unknown | unknown | unknown      | Original | Nasopharyngeal swab                   |
| hCoV-19/Mexico/CMX-INER-0159/2020 | EPI_ISL_837755  | 05/07/2020 | Mexico City     | Human | Female  | 29      | Released     | Original | Oropharyngeal swab                    |
| hCoV-19/Mexico/BCN-InDRE-51/2020  | EPI_ISL_516611  | 05/07/2020 | Baja California | Human | Male    | 74      | Deceased     | Original | Oropharyngeal swab                    |
| hCoV-19/Mexico/NLE-UANL-018/2020  | EPI_ISL_779182  | 05/07/2020 | Nuevo Leon      | Human | Male    | 51      | unknown      | Original |                                       |
| hCoV-19/Mexico/NLE-UANL-019/2020  | EPI_ISL_779183  | 05/07/2020 | Nuevo Leon      | Human | Male    | 35      | unknown      | Original |                                       |
| hCoV-19/Mexico/NLE-UANL-020/2020  | EPI_ISL_779184  | 05/07/2020 | Nuevo Leon      | Human | Female  | 51      | unknown      | Original |                                       |
| hCoV-19/Mexico/CMX-INER-0160/2020 | EPI_ISL_837756  | 06/07/2020 | Mexico City     | Human | Female  | 39      | Released     | Original | Nasopharyngeal and oropharyngeal swab |
| hCoV-19/Mexico/CMX-INER-0161/2020 | EPI_ISL_837757  | 06/07/2020 | Mexico City     | Human | Female  | 56      | Deceased     | Original | Nasopharyngeal and oropharyngeal swab |
| hCoV-19/Mexico/ROO-InDRE_243/2020 | EPI_ISL_942929  | 06/07/2020 | Quintana Roo    | Human | Male    | 36      | Released     | Original | Oropharyngeal swab                    |
| hCoV-19/Mexico/BCN-ALSR-2560/2020 | EPI_ISL_635563  | 06/07/2020 | Baja California | Human | unknown | unknown | unknown      | Original | Nasopharyngeal swab                   |
| hCoV-19/Mexico/BCN-ALSR-2561/2020 | EPI_ISL_635564  | 06/07/2020 | Baja California | Human | unknown | unknown | unknown      | Original | Nasopharyngeal swab                   |
| hCoV-19/Mexico/BCN-ALSR-2562/2020 | EPI_ISL_635565  | 06/07/2020 | Baja California | Human | unknown | unknown | unknown      | Original | Nasopharyngeal swab                   |
| hCoV-19/Mexico/BCN-ALSR-2563/2020 | EPI_ISL_635566  | 06/07/2020 | Baja California | Human | unknown | unknown | unknown      | Original | Nasopharyngeal swab                   |
| hCoV-19/Mexico/BCN-ALSR-2565/2020 | EPI_ISL_635567  | 06/07/2020 | Baja California | Human | unknown | unknown | unknown      | Original | Nasopharyngeal swab                   |
| hCoV-19/Mexico/CMX-INER-0162/2020 | EPI_ISL_837758  | 07/07/2020 | Mexico City     | Human | Male    | 57      | Deceased     | Original | Nasopharyngeal and oropharyngeal swab |
| hCoV-19/Mexico/CMX-INER-0163/2020 | EPI_ISL_837759  | 07/07/2020 | Mexico City     | Human | Female  | 64      | unknown      | Original | Nasopharyngeal and oropharyngeal swab |
| hCoV-19/Mexico/BCN-ALSR-4896/2020 | EPI_ISL_730200  | 07/07/2020 | Baja California | Human | unknown | unknown | unknown      | Original | Nasopharyngeal swab                   |
| hCoV-19/Mexico/NLE-UANL-055/2020  | EPI_ISL_961774  | 07/07/2020 | Nuevo Leon      | Human | Male    | 81      | Hospitalized | Original |                                       |
| hCoV-19/Mexico/BCN-ALSR-2566/2020 | EPI_ISL_635568  | 07/07/2020 | Baja California | Human | unknown | unknown | unknown      | Original | Nasopharyngeal swab                   |
| hCoV-19/Mexico/BCN-ALSR-2568/2020 | EPI_ISL_635569  | 07/07/2020 | Baja California | Human | unknown | unknown | unknown      | Original | Nasopharyngeal swab                   |
| hCoV-19/Mexico/BCN-ALSR-4898/2020 | EPI_ISL_730201  | 08/07/2020 | Baja California | Human | unknown | unknown | unknown      | Original | Nasopharyngeal swab                   |
| hCoV-19/Mexico/BCN-ALSR-4899/2020 | EPI_ISL_730202  | 08/07/2020 | Baja California | Human | unknown | unknown | unknown      | Original | Nasopharyngeal swab                   |
| hCoV-19/Mexico/BCN-ALSR-4900/2020 | EPI_ISL_730203  | 08/07/2020 | Baja California | Human | unknown | unknown | unknown      | Original | Nasopharyngeal swab                   |
| hCoV-19/Mexico/BCN-ALSR-4902/2020 | EPI_ISL_730204  | 08/07/2020 | Baja California | Human | unknown | unknown | unknown      | Original | Nasopharyngeal swab                   |
| hCoV-19/Mexico/BCN-ALSR-4903/2020 | EPI_ISL_730205  | 08/07/2020 | Baja California | Human | unknown | unknown | unknown      | Original | Nasopharyngeal swab                   |
| hCoV-19/Mexico/BCN-ALSR-2569/2020 | EPI_ISL_635570  | 08/07/2020 | Baja California | Human | unknown | unknown | unknown      | Original | Nasopharyngeal swab                   |
| hCoV-19/Mexico/BCN-ALSR-2570/2020 | EPI_ISL_635571  | 08/07/2020 | Baja California | Human | unknown | unknown | unknown      | Original | Nasopharyngeal swab                   |
| hCoV-19/Mexico/BCN-ALSR-2571/2020 | EPI_ISL_635572  | 08/07/2020 | Baja California | Human | unknown | unknown | unknown      | Original | Nasopharyngeal swab                   |
| hCoV-19/Mexico/CMX-INER-0164/2020 | EPI_ISL_837760  | 09/07/2020 | Mexico City     | Human | Female  | 65      | Released     | Original | Nasopharyngeal and oropharyngeal swab |
| hCoV-19/Mexico/CMX-INER-0165/2020 | EPI_ISL_837761  | 10/07/2020 | Mexico City     | Human | Female  | 30      | Released     | Original | Nasopharyngeal and oropharyngeal swab |
| hCoV-19/Mexico/CMX-INER-0166/2020 | EPI_ISL_837762  | 10/07/2020 | Mexico City     | Human | Male    | 50      | Deceased     | Original | Nasopharyngeal and oropharyngeal swab |
| hCoV-19/Mexico/BCN-ALSR-4904/2020 | EPI_ISL_730206  | 11/07/2020 | Baja California | Human | unknown | unknown | unknown      | Original | Nasopharyngeal swab                   |
| hCoV-19/Mexico/BCN-ALSR-4905/2020 | EPI_ISL_730207  | 11/07/2020 | Baja California | Human | unknown | unknown | unknown      | Original | Nasopharyngeal swab                   |



|                                   |                 |            |                 |       |         |         |              |          |                                       |
|-----------------------------------|-----------------|------------|-----------------|-------|---------|---------|--------------|----------|---------------------------------------|
| hCoV-19/Mexico/NLE-UANL-085/2020  | EPI_ISL_961773  | 11/07/2020 | Nuevo Leon      | Human | Male    | 57      | Hospitalized | Original |                                       |
| hCoV-19/Mexico/CMX-INER-0167/2020 | EPI_ISL_837763  | 12/07/2020 | Mexico City     | Human | Female  | 37      | Released     | Original | Oropharyngeal swab                    |
| hCoV-19/Mexico/CMX-INER-0168/2020 | EPI_ISL_837764  | 13/07/2020 | Mexico City     | Human | Female  | 64      | Released     | Original | Nasopharyngeal and oropharyngeal swab |
| hCoV-19/Mexico/CMX-INER-0169/2020 | EPI_ISL_837765  | 13/07/2020 | Mexico City     | Human | Male    | 35      | Released     | Original | Nasopharyngeal and oropharyngeal swab |
| hCoV-19/Mexico/NLE-UANL-086/2020  | EPI_ISL_961772  | 13/07/2020 | Nuevo Leon      | Human | Male    | 53      | Hospitalized | Original |                                       |
| hCoV-19/Mexico/CMX-INER-0170/2020 | EPI_ISL_837766  | 14/07/2020 | Mexico City     | Human | Male    | 38      | Released     | Original | Nasopharyngeal and oropharyngeal swab |
| hCoV-19/Mexico/CMX-INER-0171/2020 | EPI_ISL_837767  | 14/07/2020 | Mexico City     | Human | Female  | 68      | Hospitalized | Original | Nasopharyngeal and oropharyngeal swab |
| hCoV-19/Mexico/CMX-INER-0172/2020 | EPI_ISL_837768  | 15/07/2020 | Mexico City     | Human | Male    | 47      | Hospitalized | Original | Tracheal aspirate                     |
| hCoV-19/Mexico/CMX-INER-0173/2020 | EPI_ISL_837769  | 15/07/2020 | Mexico City     | Human | Female  | 31      | Hospitalized | Original | Nasopharyngeal and oropharyngeal swab |
| hCoV-19/Mexico/NLE-UANL-083/2020  | EPI_ISL_961771  | 15/07/2020 | Nuevo Leon      | Human | Male    | 42      | Hospitalized | Original |                                       |
| hCoV-19/Mexico/CMX-INER-0174/2020 | EPI_ISL_837770  | 16/07/2020 | Mexico City     | Human | Female  | 36      | Released     | Original | Oropharyngeal swab                    |
| hCoV-19/Mexico/CMX-INER-0175/2020 | EPI_ISL_837771  | 16/07/2020 | Mexico City     | Human | Male    | 27      | Hospitalized | Original | Nasopharyngeal and oropharyngeal swab |
| hCoV-19/Mexico/BCN-ALSR-2573/2020 | EPI_ISL_635574  | 16/07/2020 | Baja California | Human | unknown | unknown | unknown      | Original | Nasopharyngeal swab                   |
| hCoV-19/Mexico/BCN-ALSR-2574/2020 | EPI_ISL_635575  | 16/07/2020 | Baja California | Human | unknown | unknown | unknown      | Original | Nasopharyngeal swab                   |
| hCoV-19/Mexico/CMX-INER-0176/2020 | EPI_ISL_837772  | 17/07/2020 | Mexico City     | Human | Female  | 71      | Deceased     | Original | Tracheal aspirate                     |
| hCoV-19/Mexico/CMX-INER-0177/2020 | EPI_ISL_837773  | 17/07/2020 | Mexico City     | Human | Female  | 43      | Released     | Original | Nasopharyngeal and oropharyngeal swab |
| hCoV-19/Mexico/CHP-InDRE_168/2020 | EPI_ISL_913969  | 17/07/2020 | Chiapas         | Human | Female  | 22      | unknown      | Original | Oropharyngeal swab                    |
| hCoV-19/Mexico/BCN-ALSR-4910/2020 | EPI_ISL_730208  | 17/07/2020 | Baja California | Human | unknown | unknown | unknown      | Original | Nasopharyngeal swab                   |
| hCoV-19/Mexico/GRO-InDRE-92/2020  | EPI_ISL_658899  | 18/07/2020 | Guerrero        | Human | Female  | 47      | Released     | Original | Oropharyngeal swab                    |
| hCoV-19/Mexico/CMX-INER-0178/2020 | EPI_ISL_837774  | 18/07/2020 | Mexico City     | Human | Male    | 30      | Released     | Original | Oropharyngeal swab                    |
| hCoV-19/Mexico/CMX-INER-0179/2020 | EPI_ISL_837775  | 18/07/2020 | Mexico City     | Human | Male    | 84      | Deceased     | Original | Nasopharyngeal swab                   |
| hCoV-19/Mexico/MOR-InDRE_113/2020 | EPI_ISL_913917  | 18/07/2020 | Morelos         | Human | Female  | 28      | unknown      | Original | Oropharyngeal swab                    |
| hCoV-19/Mexico/CMX-INER-0180/2020 | EPI_ISL_837776  | 19/07/2020 | Mexico City     | Human | Female  | 49      | Released     | Original | Oropharyngeal swab                    |
| hCoV-19/Mexico/SON-InDRE_329/2020 | EPI_ISL_1060763 | 19/07/2020 | Sonora          | Human | Male    | 56      | unknown      | Original | Oropharyngeal swab                    |
| hCoV-19/Mexico/NLE-UANL-056/2020  | EPI_ISL_961767  | 19/07/2020 | Nuevo Leon      | Human | Male    | 38      | Hospitalized | Original |                                       |
| hCoV-19/Mexico/NLE-UANL-057/2020  | EPI_ISL_961768  | 19/07/2020 | Nuevo Leon      | Human | Male    | 39      | Hospitalized | Original |                                       |
| hCoV-19/Mexico/CMX-INER-0181/2020 | EPI_ISL_837777  | 20/07/2020 | Mexico City     | Human | Male    | 46      | Hospitalized | Original | Nasopharyngeal and oropharyngeal swab |
| hCoV-19/Mexico/CMX-INER-0182/2020 | EPI_ISL_837778  | 20/07/2020 | Mexico City     | Human | Female  | 24      | Released     | Original | Nasopharyngeal and oropharyngeal swab |
| hCoV-19/Mexico/BCN-ALSR-8361/2020 | EPI_ISL_1531825 | 20/07/2020 | Baja California | Human | unknown | unknown | unknown      | Original | Nasal swab                            |
| hCoV-19/Mexico/BCN-ALSR-8362/2020 | EPI_ISL_1531826 | 20/07/2020 | Baja California | Human | unknown | unknown | unknown      | Original | Nasal swab                            |
| hCoV-19/Mexico/BCN-ALSR-2572/2020 | EPI_ISL_635573  | 20/07/2020 | Baja California | Human | unknown | unknown | unknown      | Original | Nasopharyngeal swab                   |
| hCoV-19/Mexico/CMX-INER-0183/2020 | EPI_ISL_837779  | 21/07/2020 | Mexico City     | Human | Male    | unknown | unknown      | Original | Nasopharyngeal and oropharyngeal swab |
| hCoV-19/Mexico/CMX-INER-0184/2020 | EPI_ISL_837780  | 21/07/2020 | Mexico City     | Human | Female  | 24      | Released     | Original | Oropharyngeal swab                    |
| hCoV-19/Mexico/CHP-InDRE_107/2020 | EPI_ISL_913911  | 21/07/2020 | Chiapas         | Human | Male    | 43      | unknown      | Original | Oropharyngeal swab                    |
| hCoV-19/Mexico/CHP-InDRE_108/2020 | EPI_ISL_913912  | 21/07/2020 | Chiapas         | Human | Female  | 34      | unknown      | Original | Oropharyngeal swab                    |
| hCoV-19/Mexico/NLE-UANL-087/2020  | EPI_ISL_961766  | 21/07/2020 | Nuevo Leon      | Human | Male    | 37      | Hospitalized | Original |                                       |
| hCoV-19/Mexico/GTO-InDRE_115/2020 | EPI_ISL_913919  | 22/07/2020 | Guanajuato      | Human | Female  | 32      | unknown      | Original | Oropharyngeal swab                    |
| hCoV-19/Mexico/CHH-InDRE_325/2020 | EPI_ISL_1060762 | 22/07/2020 | Chihuahua       | Human | Male    | 36      | Released     | Original | Oropharyngeal swab                    |
| hCoV-19/Mexico/HID-InDRE-54/2020  | EPI_ISL_576257  | 22/07/2020 | Hidalgo         | Human | Female  | 63      | unknown      | Original | Oropharyngeal swab                    |
| hCoV-19/Mexico/CMX-INER-0185/2020 | EPI_ISL_837781  | 23/07/2020 | Mexico City     | Human | Female  | 31      | Released     | Original | Oropharyngeal swab                    |
| hCoV-19/Mexico/TLA-InDRE_109/2020 | EPI_ISL_913913  | 23/07/2020 | Tlaxcala        | Human | Male    | 28      | unknown      | Original | Oropharyngeal swab                    |

|                                           |                 |            |                 |       |         |         |              |          |                                       |
|-------------------------------------------|-----------------|------------|-----------------|-------|---------|---------|--------------|----------|---------------------------------------|
| hCoV-19/Mexico/TLA-InDRE_153/2020         | EPI_ISL_913956  | 23/07/2020 | Tlaxcala        | Human | Female  | 44      | unknown      | Original | Oropharyngeal swab                    |
| hCoV-19/Mexico/HID-InDRE_309/2020         | EPI_ISL_1060700 | 23/07/2020 | Hidalgo         | Human | Male    | 52      | unknown      | Original | Oropharyngeal swab                    |
| hCoV-19/Mexico/SLP-InDRE_315/2020         | EPI_ISL_1060702 | 23/07/2020 | San Luis Potosi | Human | Female  | 3       | unknown      | Original | Oropharyngeal swab                    |
| hCoV-19/Mexico/VER-InDRE_321/2020         | EPI_ISL_1060761 | 23/07/2020 | Veracruz        | Human | Female  | 28      | unknown      | Original | Oropharyngeal swab                    |
| hCoV-19/Mexico/CMX-InDRE_154/2020         | EPI_ISL_914879  | 23/07/2020 | Mexico City     | Human | Female  | 63      | Released     | Original | Oropharyngeal swab                    |
| hCoV-19/Mexico/NLE-UANL-079/2020          | EPI_ISL_961765  | 23/07/2020 | Nuevo Leon      | Human | Male    | 59      | Hospitalized | Original |                                       |
| hCoV-19/Mexico/SLP-InDRE_316/2020         | EPI_ISL_1060695 | 23/07/2020 | San Luis Potosi | Human | Male    | 31      | unknown      | Original | Oropharyngeal swab                    |
| hCoV-19/Mexico/GUA-InDRE_314/2020         | EPI_ISL_1060698 | 23/07/2020 | Guanajuato      | Human | Male    | 41      | unknown      | Original | Oropharyngeal swab                    |
| hCoV-19/Mexico/SLP-AH1COV2SS033_S22 SLP-I | EPI_ISL_1500639 | 23/07/2020 | San Luis Potosi | Human | Female  | 57      | Hospitalized | Original | Nasopharyngeal swab                   |
| hCoV-19/Mexico/TAM-InDRE_253/2020         | EPI_ISL_1054994 | 24/07/2020 | Tamaulipas      | Human | Female  | 50      | unknown      | Original | Oropharyngeal swab                    |
| hCoV-19/Mexico/MOR-InDRE_254/2020         | EPI_ISL_1054995 | 24/07/2020 | Morelos         | Human | Female  | 83      | Hospitalized | Original | Oropharyngeal swab                    |
| hCoV-19/Mexico/OAX-InDRE_257/2020         | EPI_ISL_1054996 | 24/07/2020 | Oaxaca          | Human | Male    | 51      | unknown      | Original | Oropharyngeal swab                    |
| hCoV-19/Mexico/CMX-INER-0186/2020         | EPI_ISL_837782  | 24/07/2020 | Mexico City     | Human | Female  | 55      | Released     | Original | Oropharyngeal swab                    |
| hCoV-19/Mexico/CMX-INER-0187/2020         | EPI_ISL_837783  | 24/07/2020 | Mexico City     | Human | Female  | 56      | Released     | Original | Nasopharyngeal and oropharyngeal swab |
| hCoV-19/Mexico/OAX-InDRE_110/2020         | EPI_ISL_913914  | 24/07/2020 | Oaxaca          | Human | Female  | 49      | Hospitalized | Original | Oropharyngeal swab                    |
| hCoV-19/Mexico/CMX-InDRE_188/2020         | EPI_ISL_933665  | 24/07/2020 | Mexico City     | Human | Female  | 39      | unknown      | Original | Oropharyngeal swab                    |
| hCoV-19/Mexico/COL-InDRE_346/2020         | EPI_ISL_1060760 | 24/07/2020 | Colima          | Human | Female  | 29      | Released     | Original | Oropharyngeal swab                    |
| hCoV-19/Mexico/HID-InDRE_311/2020         | EPI_ISL_1060684 | 24/07/2020 | Hidalgo         | Human | Male    | 58      | unknown      | Original | Oropharyngeal swab                    |
| hCoV-19/Mexico/VER-InDRE_322/2020         | EPI_ISL_1060687 | 24/07/2020 | Veracruz        | Human | Male    | 69      | unknown      | Original | Oropharyngeal swab                    |
| hCoV-19/Mexico/BCN-ALSR-2576/2020         | EPI_ISL_635576  | 24/07/2020 | Baja California | Human | unknown | unknown | unknown      | Original | Nasopharyngeal swab                   |
| hCoV-19/Mexico/MIC-InDRE_390/2020         | EPI_ISL_1054993 | 25/07/2020 | Michoacan       | Human | Female  | 51      | unknown      | Original | Oropharyngeal swab                    |
| hCoV-19/Mexico/MEX-InDRE_318/2020         | EPI_ISL_1060758 | 25/07/2020 | State of Mexico | Human | Male    | 54      | Released     | Original | Oropharyngeal swab                    |
| hCoV-19/Mexico/SON-InDRE_330/2020         | EPI_ISL_1060759 | 25/07/2020 | Sonora          | Human | Female  | 29      | unknown      | Original | Oropharyngeal swab                    |
| hCoV-19/Mexico/OAX-InDRE_258/2020         | EPI_ISL_1054990 | 26/07/2020 | Oaxaca          | Human | Female  | 31      | unknown      | Original | Oropharyngeal swab                    |
| hCoV-19/Mexico/GRO-InDRE_384/2020         | EPI_ISL_1054991 | 26/07/2020 | Guerrero        | Human | Female  | 41      | unknown      | Original | Oropharyngeal swab                    |
| hCoV-19/Mexico/GRO-InDRE_385/2020         | EPI_ISL_1054992 | 26/07/2020 | Guerrero        | Human | Male    | 63      | unknown      | Original | Oropharyngeal swab                    |
| hCoV-19/Mexico/COL-InDRE_348/2020         | EPI_ISL_1060757 | 26/07/2020 | Colima          | Human | Female  | 47      | Released     | Original | Oropharyngeal swab                    |
| hCoV-19/Mexico/CMX-InDRE_255/2020         | EPI_ISL_1054983 | 27/07/2020 | Mexico City     | Human | Male    | 1       | Released     | Original | Oropharyngeal swab                    |
| hCoV-19/Mexico/BCN-InDRE_256/2020         | EPI_ISL_1054984 | 27/07/2020 | Baja California | Human | Female  | 22      | unknown      | Original | Oropharyngeal swab                    |
| hCoV-19/Mexico/TAM-InDRE_382/2020         | EPI_ISL_1054985 | 27/07/2020 | Tamaulipas      | Human | Male    | 36      | unknown      | Original | Oropharyngeal swab                    |
| hCoV-19/Mexico/GUA-InDRE_383/2020         | EPI_ISL_1054986 | 27/07/2020 | Guanajuato      | Human | Male    | 60      | unknown      | Original | Oropharyngeal swab                    |
| hCoV-19/Mexico/HID-InDRE_386/2020         | EPI_ISL_1054987 | 27/07/2020 | Hidalgo         | Human | Male    | 54      | unknown      | Original | Oropharyngeal swab                    |
| hCoV-19/Mexico/COL-InDRE_394/2020         | EPI_ISL_1054988 | 27/07/2020 | Colima          | Human | Female  | 29      | Released     | Original | Oropharyngeal swab                    |
| hCoV-19/Mexico/OAX-InDRE_400/2020         | EPI_ISL_1054989 | 27/07/2020 | Oaxaca          | Human | Female  | 33      | unknown      | Original | Oropharyngeal swab                    |
| hCoV-19/Mexico/SLP-AH1COV2SS035_S24 SLP-I | EPI_ISL_1500866 | 27/07/2020 | San Luis Potosi | Human | Male    | 57      | Deceased     | Original |                                       |
| hCoV-19/Mexico/CMX-INER-0188/2020         | EPI_ISL_837784  | 27/07/2020 | Mexico City     | Human | Female  | 58      | Deceased     | Original | Nasopharyngeal and oropharyngeal swab |
| hCoV-19/Mexico/CMX-INER-0189/2020         | EPI_ISL_837785  | 27/07/2020 | Mexico City     | Human | Male    | 52      | Hospitalized | Original | Nasopharyngeal and oropharyngeal swab |
| hCoV-19/Mexico/SON-InDRE_323/2020         | EPI_ISL_1060755 | 27/07/2020 | Sonora          | Human | Male    | 61      | unknown      | Original | Oropharyngeal swab                    |
| hCoV-19/Mexico/SON-InDRE_328/2020         | EPI_ISL_1060756 | 27/07/2020 | Sonora          | Human | Female  | 55      | unknown      | Original | Oropharyngeal swab                    |
| hCoV-19/Mexico/TLA-InDRE_320/2020         | EPI_ISL_1060685 | 27/07/2020 | Tlaxcala        | Human | Male    | 30      | unknown      | Original | Oropharyngeal swab                    |
| hCoV-19/Mexico/TAB-InDRE_380/2020         | EPI_ISL_1054980 | 28/07/2020 | Tabasco         | Human | Male    | 64      | Released     | Original | Oropharyngeal swab                    |

|                                         |                 |            |                     |       |         |         |              |          |                                       |
|-----------------------------------------|-----------------|------------|---------------------|-------|---------|---------|--------------|----------|---------------------------------------|
| hCoV-19/Mexico/TAM-InDRE_388/2020       | EPI_ISL_1054981 | 28/07/2020 | Tamaulipas          | Human | Female  | 30      | unknown      | Original | Oropharyngeal swab                    |
| hCoV-19/Mexico/TAM-InDRE_389/2020       | EPI_ISL_1054982 | 28/07/2020 | Tamaulipas          | Human | Female  | 37      | unknown      | Original | Oropharyngeal swab                    |
| hCoV-19/Mexico/MEX-InDRE_259/2020       | EPI_ISL_1054977 | 28/07/2020 | State of Mexico     | Human | Female  | 41      | unknown      | Original | Oropharyngeal swab                    |
| hCoV-19/Mexico/SLP-InDRE_260/2020       | EPI_ISL_1054978 | 28/07/2020 | San Luis Potosi     | Human | Male    | 58      | Hospitalized | Original | Oropharyngeal swab                    |
| hCoV-19/Mexico/OAX-InDRE_262/2020       | EPI_ISL_1054979 | 28/07/2020 | Oaxaca              | Human | Male    | 39      | unknown      | Original | Oropharyngeal swab                    |
| hCoV-19/Mexico/MEX-InDRE_324/2020       | EPI_ISL_1060752 | 28/07/2020 | State of Mexico     | Human | Female  | 26      | Released     | Original | Oropharyngeal swab                    |
| hCoV-19/Mexico/SON-InDRE_339/2020       | EPI_ISL_1060753 | 28/07/2020 | Sonora              | Human | Male    | unknown | unknown      | Original | Oropharyngeal swab                    |
| hCoV-19/Mexico/MOR-InDRE_359/2020       | EPI_ISL_1060754 | 28/07/2020 | Morelos             | Human | Female  | 35      | unknown      | Original | Oropharyngeal swab                    |
| hCoV-19/Mexico/CMX-INER-0190/2020       | EPI_ISL_837786  | 29/07/2020 | Mexico City         | Human | Male    | 48      | Released     | Original | Oropharyngeal swab                    |
| hCoV-19/Mexico/CMX-INER-0191/2020       | EPI_ISL_837787  | 29/07/2020 | Mexico City         | Human | Male    | 38      | Hospitalized | Original | Nasopharyngeal and oropharyngeal swab |
| hCoV-19/Mexico/CHP-InDRE_396/2020       | EPI_ISL_1054973 | 29/07/2020 | Chiapas             | Human | Male    | 18      | unknown      | Original | Oropharyngeal swab                    |
| hCoV-19/Mexico/CHP-InDRE_397/2020       | EPI_ISL_1054974 | 29/07/2020 | Chiapas             | Human | Female  | 18      | unknown      | Original | Oropharyngeal swab                    |
| hCoV-19/Mexico/SON-InDRE_398/2020       | EPI_ISL_1054975 | 29/07/2020 | Sonora              | Human | Male    | 34      | unknown      | Original | Oropharyngeal swab                    |
| hCoV-19/Mexico/OAX-InDRE_399/2020       | EPI_ISL_1054976 | 29/07/2020 | Oaxaca              | Human | Female  | 40      | unknown      | Original | Oropharyngeal swab                    |
| hCoV-19/Mexico/BCN-ALSR-8363/2020       | EPI_ISL_1531827 | 29/07/2020 | Baja California     | Human | unknown | unknown | unknown      | Original | Nasal swab                            |
| hCoV-19/Mexico/BCN-ALSR-8364/2020       | EPI_ISL_1531828 | 29/07/2020 | Baja California     | Human | unknown | unknown | unknown      | Original | Nasal swab                            |
| hCoV-19/Mexico/BCN-ALSR-8365/2020       | EPI_ISL_1531829 | 29/07/2020 | Baja California     | Human | unknown | unknown | unknown      | Original | Nasal swab                            |
| hCoV-19/Mexico/BCN-ALSR-8366/2020       | EPI_ISL_1531830 | 29/07/2020 | Baja California     | Human | unknown | unknown | unknown      | Original | Nasal swab                            |
| hCoV-19/Mexico/CMX-INER-0192/2020       | EPI_ISL_837788  | 30/07/2020 | Mexico City         | Human | Male    | unknown | unknown      | Original | Nasopharyngeal and oropharyngeal swab |
| hCoV-19/Mexico/TLA-InDRE_261/2020       | EPI_ISL_1054967 | 30/07/2020 | Tlaxcala            | Human | Male    | 25      | unknown      | Original | Oropharyngeal swab                    |
| hCoV-19/Mexico/PUE-InDRE_381/2020       | EPI_ISL_1054968 | 30/07/2020 | Puebla              | Human | Female  | 46      | Released     | Original | Oropharyngeal swab                    |
| hCoV-19/Mexico/TLA-InDRE_391/2020       | EPI_ISL_1054969 | 30/07/2020 | Tlaxcala            | Human | Female  | 23      | unknown      | Original | Oropharyngeal swab                    |
| hCoV-19/Mexico/GUA-InDRE_395/2020       | EPI_ISL_1054970 | 30/07/2020 | Guanajuato          | Human | Male    | 41      | unknown      | Original | Oropharyngeal swab                    |
| hCoV-19/Mexico/QUE-InDRE_401/2020       | EPI_ISL_1054971 | 30/07/2020 | Queretaro           | Human | Male    | 29      | unknown      | Original | Oropharyngeal swab                    |
| hCoV-19/Mexico/QUE-InDRE_402/2020       | EPI_ISL_1054972 | 30/07/2020 | Queretaro           | Human | Male    | 38      | unknown      | Original | Oropharyngeal swab                    |
| hCoV-19/Mexico/SLP-InDRE_317/2020       | EPI_ISL_1060750 | 30/07/2020 | San Luis Potosi     | Human | Female  | 37      | unknown      | Original | Oropharyngeal swab                    |
| hCoV-19/Mexico/BCS-InDRE_327/2020       | EPI_ISL_1060751 | 30/07/2020 | Baja California Sur | Human | Male    | 28      | unknown      | Original | Oropharyngeal swab                    |
| hCoV-19/Mexico/SLP-UASLP-AH1COV2SS026_S | EPI_ISL_1494724 | 30/07/2020 | San Luis Potosi     | Human | Male    | 70      | Deceased     | Original |                                       |
| hCoV-19/Mexico/CMX-INER-0193/2020       | EPI_ISL_837789  | 31/07/2020 | Mexico City         | Human | Male    | 5       | Released     | Original | Oropharyngeal swab                    |
| hCoV-19/Mexico/CMX-INER-0194/2020       | EPI_ISL_837790  | 31/07/2020 | Mexico City         | Human | Male    | 78      | Deceased     | Original | Oropharyngeal swab                    |
| hCoV-19/Mexico/BCS-InDRE_326/2020       | EPI_ISL_1060747 | 31/07/2020 | Baja California Sur | Human | Female  | 41      | unknown      | Original | Oropharyngeal swab                    |
| hCoV-19/Mexico/BCS-InDRE_337/2020       | EPI_ISL_1060748 | 31/07/2020 | Baja California Sur | Human | Male    | 28      | unknown      | Original | Oropharyngeal swab                    |
| hCoV-19/Mexico/BCS-InDRE_340/2020       | EPI_ISL_1060749 | 31/07/2020 | Baja California Sur | Human | Male    | 38      | unknown      | Original | Oropharyngeal swab                    |
| hCoV-19/Mexico/CMX-INMEGEN-01/2020      | EPI_ISL_522872  | 31/07/2020 | Mexico City         | Human | Female  | 38      | Live         | Original | Nasopharyngeal swab                   |
| hCoV-19/Mexico/CMX-INMEGEN-02/2020      | EPI_ISL_522873  | 31/07/2020 | Mexico City         | Human | Male    | 29      | Live         | Original | Nasopharyngeal swab                   |
| hCoV-19/Mexico/CMX-INMEGEN-03/2020      | EPI_ISL_522874  | 31/07/2020 | Mexico City         | Human | Male    | 60      | Live         | Original | Nasopharyngeal swab                   |
| hCoV-19/Mexico/CMX-INMEGEN-04/2020      | EPI_ISL_522875  | 31/07/2020 | Mexico City         | Human | Female  | 22      | Live         | Original | Nasopharyngeal swab                   |
| hCoV-19/Mexico/CMX-INMEGEN-05/2020      | EPI_ISL_522876  | 31/07/2020 | Mexico City         | Human | Female  | 92      | Live         | Original | Nasopharyngeal swab                   |
| hCoV-19/Mexico/CMX-INMEGEN-08/2020      | EPI_ISL_522879  | 31/07/2020 | Mexico City         | Human | Male    | 22      | Live         | Original | Nasopharyngeal swab                   |
| hCoV-19/Mexico/CMX-INMEGEN-11/2020      | EPI_ISL_522941  | 31/07/2020 | Mexico City         | Human | Female  | 9       | Live         | Original | Nasopharyngeal swab                   |
| hCoV-19/Mexico/GUA-InDRE_298/2020       | EPI_ISL_1060746 | 01/08/2020 | Guanajuato          | Human | Female  | 33      | unknown      | Original | Oropharyngeal swab                    |

|                                    |                 |            |                 |       |         |         |              |          |                                       |
|------------------------------------|-----------------|------------|-----------------|-------|---------|---------|--------------|----------|---------------------------------------|
| hCoV-19/Mexico/CMX-INMEGEN-06/2020 | EPI_ISL_522877  | 01/08/2020 | Mexico City     | Human | Male    | 45      | Live         | Original | Nasopharyngeal swab                   |
| hCoV-19/Mexico/CMX-INMEGEN-07/2020 | EPI_ISL_522878  | 01/08/2020 | Mexico City     | Human | Male    | 30      | Live         | Original | Nasopharyngeal swab                   |
| hCoV-19/Mexico/CMX-INMEGEN-09/2020 | EPI_ISL_522880  | 01/08/2020 | Mexico City     | Human | Male    | 25      | Live         | Original | Nasopharyngeal swab                   |
| hCoV-19/Mexico/CMX-INMEGEN-10/2020 | EPI_ISL_522940  | 01/08/2020 | Mexico City     | Human | Male    | 45      | Live         | Original | Nasopharyngeal swab                   |
| hCoV-19/Mexico/CMX-INER-0195/2020  | EPI_ISL_837791  | 02/08/2020 | Mexico City     | Human | Male    | 48      | Deceased     | Original | Nasopharyngeal and oropharyngeal swab |
| hCoV-19/Mexico/OAX-InDRE_266/2020  | EPI_ISL_1054966 | 02/08/2020 | Oaxaca          | Human | Female  | 51      | unknown      | Original | Oropharyngeal swab                    |
| hCoV-19/Mexico/TAM-InDRE_300/2020  | EPI_ISL_1060744 | 02/08/2020 | Tamaulipas      | Human | Male    | 31      | unknown      | Original | Oropharyngeal swab                    |
| hCoV-19/Mexico/SLP-InDRE_301/2020  | EPI_ISL_1060745 | 02/08/2020 | San Luis Potosi | Human | Female  | 24      | unknown      | Original | Oropharyngeal swab                    |
| hCoV-19/Mexico/BCN-ALSR-4942/2020  | EPI_ISL_730222  | 02/08/2020 | Baja California | Human | unknown | unknown | unknown      | Original | Nasopharyngeal swab                   |
| hCoV-19/Mexico/BCN-ALSR-4943/2020  | EPI_ISL_730223  | 02/08/2020 | Baja California | Human | unknown | unknown | unknown      | Original | Nasopharyngeal swab                   |
| hCoV-19/Mexico/BCN-ALSR-4946/2020  | EPI_ISL_730224  | 02/08/2020 | Baja California | Human | unknown | unknown | unknown      | Original | Nasopharyngeal swab                   |
| hCoV-19/Mexico/BCN-ALSR-4947/2020  | EPI_ISL_730225  | 02/08/2020 | Baja California | Human | unknown | unknown | unknown      | Original | Nasopharyngeal swab                   |
| hCoV-19/Mexico/BCN-ALSR-4951/2020  | EPI_ISL_730226  | 02/08/2020 | Baja California | Human | unknown | unknown | unknown      | Original | Nasopharyngeal swab                   |
| hCoV-19/Mexico/BCN-ALSR-4952/2020  | EPI_ISL_730227  | 02/08/2020 | Baja California | Human | unknown | unknown | unknown      | Original | Nasopharyngeal swab                   |
| hCoV-19/Mexico/BCN-ALSR-4953/2020  | EPI_ISL_730228  | 02/08/2020 | Baja California | Human | unknown | unknown | unknown      | Original | Nasopharyngeal swab                   |
| hCoV-19/Mexico/CMX-INER-0196/2020  | EPI_ISL_837792  | 03/08/2020 | Mexico City     | Human | Female  | unknown | unknown      | Original | Nasopharyngeal and oropharyngeal swab |
| hCoV-19/Mexico/MEX-InDRE_263/2020  | EPI_ISL_1054964 | 03/08/2020 | State of Mexico | Human | Female  | 48      | Released     | Original | Oropharyngeal swab                    |
| hCoV-19/Mexico/OAX-InDRE_267/2020  | EPI_ISL_1054965 | 03/08/2020 | Oaxaca          | Human | Male    | 57      | unknown      | Original | Oropharyngeal swab                    |
| hCoV-19/Mexico/GUA-InDRE_299/2020  | EPI_ISL_1060742 | 03/08/2020 | Guanajuato      | Human | Female  | 23      | unknown      | Original | Oropharyngeal swab                    |
| hCoV-19/Mexico/MEX-InDRE_302/2020  | EPI_ISL_1060743 | 03/08/2020 | State of Mexico | Human | Male    | 59      | Hospitalized | Original | Oropharyngeal swab                    |
| hCoV-19/Mexico/BCN-ALSR-4917/2020  | EPI_ISL_730209  | 03/08/2020 | Baja California | Human | unknown | unknown | unknown      | Original | Nasopharyngeal swab                   |
| hCoV-19/Mexico/CHP-InDRE_264/2020  | EPI_ISL_1054962 | 04/08/2020 | Chiapas         | Human | Male    | 37      | unknown      | Original | Oropharyngeal swab                    |
| hCoV-19/Mexico/CHP-InDRE_265/2020  | EPI_ISL_1054963 | 04/08/2020 | Chiapas         | Human | Male    | 45      | unknown      | Original | Oropharyngeal swab                    |
| hCoV-19/Mexico/TLA-InDRE_305/2020  | EPI_ISL_1060740 | 04/08/2020 | Tlaxcala        | Human | Female  | 44      | unknown      | Original | Oropharyngeal swab                    |
| hCoV-19/Mexico/GUA-InDRE_306/2020  | EPI_ISL_1060741 | 04/08/2020 | Guanajuato      | Human | Female  | 39      | unknown      | Original | Oropharyngeal swab                    |
| hCoV-19/Mexico/BCN-ALSR-8367/2020  | EPI_ISL_1531831 | 04/08/2020 | Baja California | Human | unknown | unknown | unknown      | Original | Nasal swab                            |
| hCoV-19/Mexico/BCN-ALSR-8368/2020  | EPI_ISL_1531832 | 04/08/2020 | Baja California | Human | unknown | unknown | unknown      | Original | Nasal swab                            |
| hCoV-19/Mexico/BCN-ALSR-8369/2020  | EPI_ISL_1531833 | 04/08/2020 | Baja California | Human | unknown | unknown | unknown      | Original | Nasal swab                            |
| hCoV-19/Mexico/BCN-ALSR-8370/2020  | EPI_ISL_1531834 | 04/08/2020 | Baja California | Human | unknown | unknown | unknown      | Original | Nasal swab                            |
| hCoV-19/Mexico/BCN-ALSR-8371/2020  | EPI_ISL_1531835 | 04/08/2020 | Baja California | Human | unknown | unknown | unknown      | Original | Nasal swab                            |
| hCoV-19/Mexico/GUA-InDRE_307/2020  | EPI_ISL_1060738 | 05/08/2020 | Guanajuato      | Human | Male    | 34      | unknown      | Original | Oropharyngeal swab                    |
| hCoV-19/Mexico/JAL-InDRE_313/2020  | EPI_ISL_1060739 | 05/08/2020 | Jalisco         | Human | Male    | 63      | unknown      | Original | Oropharyngeal swab                    |
| hCoV-19/Mexico/NLE-UANL-059/2020   | EPI_ISL_961762  | 05/08/2020 | Nuevo Leon      | Human | Female  | 18      | Hospitalized | Original |                                       |
| hCoV-19/Mexico/NLE-UANL-060/2020   | EPI_ISL_961763  | 05/08/2020 | Nuevo Leon      | Human | Male    | 32      | Hospitalized | Original |                                       |
| hCoV-19/Mexico/BCN-ALSR-8372/2020  | EPI_ISL_1531836 | 05/08/2020 | Baja California | Human | unknown | unknown | unknown      | Original | Nasal swab                            |
| hCoV-19/Mexico/BCN-ALSR-8373/2020  | EPI_ISL_1531837 | 05/08/2020 | Baja California | Human | unknown | unknown | unknown      | Original | Nasal swab                            |
| hCoV-19/Mexico/CMX-INMEGEN-20/2020 | EPI_ISL_522985  | 05/08/2020 | Mexico City     | Human | Female  | 52      | Live         | Original | Nasopharyngeal swab                   |
| hCoV-19/Mexico/CMX-INER-0197/2020  | EPI_ISL_837601  | 05/08/2020 | Mexico City     | Human | Female  | 58      | Released     | Original | Nasopharyngeal and oropharyngeal swab |
| hCoV-19/Mexico/CMX-INER-0198/2020  | EPI_ISL_837793  | 06/08/2020 | Mexico City     | Human | Female  | 23      | Released     | Original | Oropharyngeal swab                    |
| hCoV-19/Mexico/HID-InDRE_304/2020  | EPI_ISL_1060736 | 06/08/2020 | Hidalgo         | Human | Male    | 63      | Released     | Original | Oropharyngeal swab                    |
| hCoV-19/Mexico/TAM-InDRE_308/2020  | EPI_ISL_1060737 | 06/08/2020 | Tamaulipas      | Human | Female  | 48      | unknown      | Original | Oropharyngeal swab                    |



|                                    |                 |            |                 |       |         |         |              |          |                                       |
|------------------------------------|-----------------|------------|-----------------|-------|---------|---------|--------------|----------|---------------------------------------|
| hCoV-19/Mexico/CMX-INMEGEN-22/2020 | EPI_ISL_523500  | 06/08/2020 | Mexico City     | Human | Male    | 39      | Live         | Original | Nasopharyngeal swab                   |
| hCoV-19/Mexico/NLE-UANL-084/2020   | EPI_ISL_961761  | 06/08/2020 | Nuevo Leon      | Human | Female  | 47      | Hospitalized | Original |                                       |
| hCoV-19/Mexico/CMX-INMEGEN-21/2020 | EPI_ISL_522986  | 06/08/2020 | Mexico City     | Human | Female  | 33      | Live         | Original | Nasopharyngeal swab                   |
| hCoV-19/Mexico/BCN-ALSR-8374/2020  | EPI_ISL_1531838 | 06/08/2020 | Baja California | Human | unknown | unknown | unknown      | Original | Nasal swab                            |
| hCoV-19/Mexico/BCN-ALSR-8375/2020  | EPI_ISL_1531839 | 06/08/2020 | Baja California | Human | unknown | unknown | unknown      | Original | Nasal swab                            |
| hCoV-19/Mexico/BCN-ALSR-8376/2020  | EPI_ISL_1531840 | 06/08/2020 | Baja California | Human | unknown | unknown | unknown      | Original | Nasal swab                            |
| hCoV-19/Mexico/CMX-INMEGEN-12/2020 | EPI_ISL_522942  | 06/08/2020 | Mexico City     | Human | Female  | 25      | Live         | Original | Nasopharyngeal swab                   |
| hCoV-19/Mexico/CMX-INMEGEN-13/2020 | EPI_ISL_522978  | 06/08/2020 | Mexico City     | Human | Male    | 49      | Live         | Original | Nasopharyngeal swab                   |
| hCoV-19/Mexico/CMX-INMEGEN-14/2020 | EPI_ISL_522979  | 06/08/2020 | Mexico City     | Human | Female  | 49      | Live         | Original | Nasopharyngeal swab                   |
| hCoV-19/Mexico/CMX-INMEGEN-15/2020 | EPI_ISL_522980  | 06/08/2020 | Mexico City     | Human | Female  | 25      | Live         | Original | Nasopharyngeal swab                   |
| hCoV-19/Mexico/CMX-INMEGEN-16/2020 | EPI_ISL_522981  | 06/08/2020 | Mexico City     | Human | Female  | 15      | Live         | Original | Nasopharyngeal swab                   |
| hCoV-19/Mexico/CMX-INMEGEN-17/2020 | EPI_ISL_522982  | 06/08/2020 | Mexico City     | Human | Female  | 46      | Live         | Original | Nasopharyngeal swab                   |
| hCoV-19/Mexico/CMX-INMEGEN-18/2020 | EPI_ISL_522983  | 06/08/2020 | Mexico City     | Human | Male    | 27      | Live         | Original | Nasopharyngeal swab                   |
| hCoV-19/Mexico/CMX-INMEGEN-19/2020 | EPI_ISL_522984  | 06/08/2020 | Mexico City     | Human | Female  | 51      | Live         | Original | Nasopharyngeal swab                   |
| hCoV-19/Mexico/CMX-InDRE_268/2020  | EPI_ISL_1054960 | 07/08/2020 | Mexico City     | Human | Male    | 26      | Released     | Original | Oropharyngeal swab                    |
| hCoV-19/Mexico/MOR-InDRE_270/2020  | EPI_ISL_1054961 | 07/08/2020 | Morelos         | Human | Male    | 39      | unknown      | Original | Oropharyngeal swab                    |
| hCoV-19/Mexico/AGU-InDRE-58/2020   | EPI_ISL_576261  | 07/08/2020 | Aguascalientes  | Human | Female  | 66      | Released     | Original | Oropharyngeal swab                    |
| hCoV-19/Mexico/BCN-ALSR-8377/2020  | EPI_ISL_1531841 | 07/08/2020 | Baja California | Human | unknown | unknown | unknown      | Original | Nasal swab                            |
| hCoV-19/Mexico/BCN-ALSR-8378/2020  | EPI_ISL_1531842 | 07/08/2020 | Baja California | Human | unknown | unknown | unknown      | Original | Nasal swab                            |
| hCoV-19/Mexico/CMX-INER-0199/2020  | EPI_ISL_837794  | 08/08/2020 | Mexico City     | Human | Male    | 81      | Deceased     | Original | Nasopharyngeal and oropharyngeal swab |
| hCoV-19/Mexico/PUE-InDRE_269/2020  | EPI_ISL_1054959 | 08/08/2020 | Puebla          | Human | Female  | 63      | unknown      | Original | Oropharyngeal swab                    |
| hCoV-19/Mexico/CMX-InDRE_303/2020  | EPI_ISL_1060735 | 08/08/2020 | Mexico City     | Human | Male    | 47      | Released     | Original | Oropharyngeal swab                    |
| hCoV-19/Mexico/BCN-ALSR-4918/2020  | EPI_ISL_730210  | 08/08/2020 | Baja California | Human | unknown | unknown | unknown      | Original | Nasopharyngeal swab                   |
| hCoV-19/Mexico/CMX-INER-0200/2020  | EPI_ISL_837795  | 09/08/2020 | Mexico City     | Human | Male    | 72      | Hospitalized | Original | Nasopharyngeal and oropharyngeal swab |
| hCoV-19/Mexico/BCN-ALSR-4920/2020  | EPI_ISL_730211  | 09/08/2020 | Baja California | Human | unknown | unknown | unknown      | Original | Nasopharyngeal swab                   |
| hCoV-19/Mexico/CMX-INER-0201/2020  | EPI_ISL_837796  | 10/08/2020 | Mexico City     | Human | Male    | 57      | Hospitalized | Original | Oropharyngeal swab                    |
| hCoV-19/Mexico/CMX-INER-0202/2020  | EPI_ISL_837797  | 10/08/2020 | Mexico City     | Human | Male    | 30      | Hospitalized | Original | Nasopharyngeal and oropharyngeal swab |
| hCoV-19/Mexico/VER-InDRE_272/2020  | EPI_ISL_1054957 | 10/08/2020 | Veracruz        | Human | Male    | 46      | unknown      | Original | Oropharyngeal swab                    |
| hCoV-19/Mexico/GRO-InDRE_276/2020  | EPI_ISL_1054958 | 10/08/2020 | Guerrero        | Human | Male    | 48      | unknown      | Original | Oropharyngeal swab                    |
| hCoV-19/Mexico/CMX-INER-0203/2020  | EPI_ISL_837798  | 11/08/2020 | Mexico City     | Human | Male    | 60      | Released     | Original | Oropharyngeal swab                    |
| hCoV-19/Mexico/CMX-INER-0204/2020  | EPI_ISL_837799  | 11/08/2020 | Mexico City     | Human | Male    | 24      | Released     | Original | Oropharyngeal swab                    |
| hCoV-19/Mexico/MEX-InDRE_274/2020  | EPI_ISL_1054954 | 11/08/2020 | State of Mexico | Human | Female  | 40      | unknown      | Original | Oropharyngeal swab                    |
| hCoV-19/Mexico/TAM-InDRE_279/2020  | EPI_ISL_1054955 | 11/08/2020 | Tamaulipas      | Human | Female  | 35      | unknown      | Original | Oropharyngeal swab                    |
| hCoV-19/Mexico/MOR-InDRE_280/2020  | EPI_ISL_1054956 | 11/08/2020 | Morelos         | Human | Male    | 26      | unknown      | Original | Oropharyngeal swab                    |
| hCoV-19/Mexico/BCN-ALSR-8379/2020  | EPI_ISL_1531843 | 11/08/2020 | Baja California | Human | unknown | unknown | unknown      | Original | Nasal swab                            |
| hCoV-19/Mexico/BCN-ALSR-8380/2020  | EPI_ISL_1531844 | 11/08/2020 | Baja California | Human | unknown | unknown | unknown      | Original | Nasal swab                            |
| hCoV-19/Mexico/BCN-ALSR-8381/2020  | EPI_ISL_1531845 | 11/08/2020 | Baja California | Human | unknown | unknown | unknown      | Original | Nasal swab                            |
| hCoV-19/Mexico/BCN-ALSR-8382/2020  | EPI_ISL_1531846 | 11/08/2020 | Baja California | Human | unknown | unknown | unknown      | Original | Nasal swab                            |
| hCoV-19/Mexico/BCN-ALSR-8383/2020  | EPI_ISL_1531847 | 11/08/2020 | Baja California | Human | unknown | unknown | unknown      | Original | Nasal swab                            |
| hCoV-19/Mexico/BCN-ALSR-8384/2020  | EPI_ISL_1531848 | 11/08/2020 | Baja California | Human | unknown | unknown | unknown      | Original | Nasal swab                            |
| hCoV-19/Mexico/BCN-ALSR-8385/2020  | EPI_ISL_1531849 | 11/08/2020 | Baja California | Human | unknown | unknown | unknown      | Original | Nasal swab                            |

|                                          |                 |            |                 |       |         |         |              |          |                                       |
|------------------------------------------|-----------------|------------|-----------------|-------|---------|---------|--------------|----------|---------------------------------------|
| hCoV-19/Mexico/BCN-ALSR-8386/2020        | EPI_ISL_1531850 | 11/08/2020 | Baja California | Human | unknown | unknown | unknown      | Original | Nasal swab                            |
| hCoV-19/Mexico/GUA-06_LA_FB_05_0178/2020 | EPI_ISL_1238787 | 12/08/2020 | Guanajuato      | Human | Female  | 27      | Released     | Original | Oropharyngeal swab                    |
| hCoV-19/Mexico/HID-InDRE_271/2020        | EPI_ISL_1054950 | 12/08/2020 | Hidalgo         | Human | Male    | 65      | unknown      | Original | Oropharyngeal swab                    |
| hCoV-19/Mexico/TLA-InDRE_273/2020        | EPI_ISL_1054951 | 12/08/2020 | Tlaxcala        | Human | Male    | 20      | unknown      | Original | Oropharyngeal swab                    |
| hCoV-19/Mexico/GUA-InDRE_277/2020        | EPI_ISL_1054952 | 12/08/2020 | Guanajuato      | Human | Male    | 30      | unknown      | Original | Oropharyngeal swab                    |
| hCoV-19/Mexico/MEX-InDRE_278/2020        | EPI_ISL_1054953 | 12/08/2020 | State of Mexico | Human | Male    | 43      | unknown      | Original | Oropharyngeal swab                    |
| hCoV-19/Mexico/NLE-UANL-058/2020         | EPI_ISL_961760  | 12/08/2020 | Nuevo Leon      | Human | Female  | 31      | Hospitalized | Original |                                       |
| hCoV-19/Mexico/BCN-ALSR-8387/2020        | EPI_ISL_1531851 | 12/08/2020 | Baja California | Human | unknown | unknown | unknown      | Original | Nasal swab                            |
| hCoV-19/Mexico/CMX-INER-0206/2020        | EPI_ISL_837800  | 13/08/2020 | Mexico City     | Human | Male    | 26      | Released     | Original | Nasopharyngeal and oropharyngeal swab |
| hCoV-19/Mexico/CMX-InDRE_275/2020        | EPI_ISL_1054947 | 13/08/2020 | Mexico City     | Human | Female  | 18      | Released     | Original | Oropharyngeal swab                    |
| hCoV-19/Mexico/TLA-InDRE_281/2020        | EPI_ISL_1054948 | 13/08/2020 | Tlaxcala        | Human | Male    | 29      | unknown      | Original | Oropharyngeal swab                    |
| hCoV-19/Mexico/MEX-InDRE_282/2020        | EPI_ISL_1054949 | 13/08/2020 | State of Mexico | Human | Female  | 36      | unknown      | Original | Oropharyngeal swab                    |
| hCoV-19/Mexico/TLA-InDRE-56/2020         | EPI_ISL_576259  | 13/08/2020 | Tlaxcala        | Human | Male    | 27      | Released     | Original | Oropharyngeal swab                    |
| hCoV-19/Mexico/TLA-InDRE-57/2020         | EPI_ISL_576260  | 13/08/2020 | Tlaxcala        | Human | Male    | 51      | Released     | Original | Oropharyngeal swab                    |
| hCoV-19/Mexico/BCN-ALSR-4922/2020        | EPI_ISL_730212  | 13/08/2020 | Baja California | Human | unknown | unknown | unknown      | Original | Nasopharyngeal swab                   |
| hCoV-19/Mexico/BCN-ALSR-4923/2020        | EPI_ISL_730213  | 13/08/2020 | Baja California | Human | unknown | unknown | unknown      | Original | Nasopharyngeal swab                   |
| hCoV-19/Mexico/CMX-INER-0205/2020        | EPI_ISL_843192  | 13/08/2020 | Mexico City     | Human | Female  | 81      | Deceased     | Original | Nasopharyngeal and oropharyngeal swab |
| hCoV-19/Mexico/BCN-ALSR-8388/2020        | EPI_ISL_1531852 | 13/08/2020 | Baja California | Human | unknown | unknown | unknown      | Original | Nasal swab                            |
| hCoV-19/Mexico/BCN-ALSR-8389/2020        | EPI_ISL_1531853 | 13/08/2020 | Baja California | Human | unknown | unknown | unknown      | Original | Nasal swab                            |
| hCoV-19/Mexico/NLE-InDRE-59/2020         | EPI_ISL_576262  | 14/08/2020 | Nuevo Leon      | Human | Female  | 28      | Released     | Original | Oropharyngeal swab                    |
| hCoV-19/Mexico/NLE-InDRE-60/2020         | EPI_ISL_576263  | 14/08/2020 | Nuevo Leon      | Human | Male    | 65      | Hospitalized | Original | Oropharyngeal swab                    |
| hCoV-19/Mexico/VER-InDRE-67/2020         | EPI_ISL_576270  | 14/08/2020 | Veracruz        | Human | Male    | 30      | Released     | Original | Oropharyngeal swab                    |
| hCoV-19/Mexico/ZAC-InDRE-72/2020         | EPI_ISL_576275  | 14/08/2020 | Zacatecas       | Human | Male    | 73      | Deceased     | Original | Oropharyngeal swab                    |
| hCoV-19/Mexico/BCN-ALSR-8390/2020        | EPI_ISL_1531854 | 14/08/2020 | Baja California | Human | unknown | unknown | unknown      | Original | Nasal swab                            |
| hCoV-19/Mexico/BCN-ALSR-8391/2020        | EPI_ISL_1531855 | 14/08/2020 | Baja California | Human | unknown | unknown | unknown      | Original | Nasal swab                            |
| hCoV-19/Mexico/BCN-ALSR-8392/2020        | EPI_ISL_1531856 | 14/08/2020 | Baja California | Human | unknown | unknown | unknown      | Original | Nasal swab                            |
| hCoV-19/Mexico/BCN-ALSR-8393/2020        | EPI_ISL_1531857 | 14/08/2020 | Baja California | Human | unknown | unknown | unknown      | Original | Nasal swab                            |
| hCoV-19/Mexico/BCN-ALSR-8394/2020        | EPI_ISL_1531858 | 14/08/2020 | Baja California | Human | unknown | unknown | unknown      | Original | Nasal swab                            |
| hCoV-19/Mexico/GRO-InDRE_284/2020        | EPI_ISL_1054946 | 15/08/2020 | Guerrero        | Human | Female  | 23      | unknown      | Original | Oropharyngeal swab                    |
| hCoV-19/Mexico/VER-InDRE-66/2020         | EPI_ISL_576269  | 16/08/2020 | Veracruz        | Human | Male    | 28      | Released     | Original | Oropharyngeal swab                    |
| hCoV-19/Mexico/CMX-InDRE_283/2020        | EPI_ISL_1054944 | 17/08/2020 | Mexico City     | Human | Male    | 34      | Released     | Original | Oropharyngeal swab                    |
| hCoV-19/Mexico/MOR-InDRE_285/2020        | EPI_ISL_1054945 | 17/08/2020 | Morelos         | Human | Male    | 51      | unknown      | Original | Oropharyngeal swab                    |
| hCoV-19/Mexico/MIC-InDRE-68/2020         | EPI_ISL_576271  | 17/08/2020 | Michoacan       | Human | Male    | 68      | Hospitalized | Original | Oropharyngeal swab                    |
| hCoV-19/Mexico/BCN-ALSR-8395/2020        | EPI_ISL_1531859 | 17/08/2020 | Baja California | Human | unknown | unknown | unknown      | Original | Nasal swab                            |
| hCoV-19/Mexico/BCN-ALSR-8396/2020        | EPI_ISL_1531860 | 17/08/2020 | Baja California | Human | unknown | unknown | unknown      | Original | Nasal swab                            |
| hCoV-19/Mexico/BCN-ALSR-8397/2020        | EPI_ISL_1531861 | 17/08/2020 | Baja California | Human | unknown | unknown | unknown      | Original | Nasal swab                            |
| hCoV-19/Mexico/TAM-InDRE_287/2020        | EPI_ISL_1054941 | 18/08/2020 | Tamaulipas      | Human | Female  | 47      | unknown      | Original | Oropharyngeal swab                    |
| hCoV-19/Mexico/SLP-InDRE_288/2020        | EPI_ISL_1054942 | 18/08/2020 | San Luis Potosi | Human | Male    | 39      | unknown      | Original | Oropharyngeal swab                    |
| hCoV-19/Mexico/SLP-InDRE_289/2020        | EPI_ISL_1054943 | 18/08/2020 | San Luis Potosi | Human | Male    | 36      | unknown      | Original | Oropharyngeal swab                    |
| hCoV-19/Mexico/HID-InDRE_293/2020        | EPI_ISL_1060734 | 18/08/2020 | Hidalgo         | Human | Female  | 37      | unknown      | Original | Oropharyngeal swab                    |
| hCoV-19/Mexico/OAX-InDRE-61/2020         | EPI_ISL_576264  | 18/08/2020 | Oaxaca          | Human | Female  | 32      | Released     | Original | Oropharyngeal swab                    |

|                                          |                 |            |                 |       |         |         |              |          |                                       |
|------------------------------------------|-----------------|------------|-----------------|-------|---------|---------|--------------|----------|---------------------------------------|
| hCoV-19/Mexico/BCN-ALSR-8398/2020        | EPI_ISL_1531862 | 18/08/2020 | Baja California | Human | unknown | unknown | unknown      | Original | Nasal swab                            |
| hCoV-19/Mexico/GUA-09_LA_FB_05_0249/2020 | EPI_ISL_1238788 | 19/08/2020 | Guanajuato      | Human | Male    | 31      | Released     | Original | Oropharyngeal swab                    |
| hCoV-19/Mexico/CMX-INER-0207/2020        | EPI_ISL_837801  | 19/08/2020 | Mexico City     | Human | Male    | unknown | unknown      | Original | Nasopharyngeal and oropharyngeal swab |
| hCoV-19/Mexico/CMX-InDRE_286/2020        | EPI_ISL_1054940 | 19/08/2020 | Mexico City     | Human | Female  | 23      | Released     | Original | Oropharyngeal swab                    |
| hCoV-19/Mexico/HID-InDRE_290/2020        | EPI_ISL_1060732 | 19/08/2020 | Hidalgo         | Human | Male    | 48      | unknown      | Original | Oropharyngeal swab                    |
| hCoV-19/Mexico/HID-InDRE_292/2020        | EPI_ISL_1060733 | 19/08/2020 | Hidalgo         | Human | Female  | 58      | unknown      | Original | Oropharyngeal swab                    |
| hCoV-19/Mexico/BCN-ALSR-8399/2020        | EPI_ISL_1531863 | 19/08/2020 | Baja California | Human | unknown | unknown | unknown      | Original | Nasal swab                            |
| hCoV-19/Mexico/CMX-INER-0208/2020        | EPI_ISL_837802  | 20/08/2020 | Mexico City     | Human | Female  | 47      | Released     | Original | Oropharyngeal swab                    |
| hCoV-19/Mexico/CMX-INER-0209/2020        | EPI_ISL_837803  | 20/08/2020 | Mexico City     | Human | Female  | 47      | Released     | Original | Oropharyngeal swab                    |
| hCoV-19/Mexico/CMX-INER-0210/2020        | EPI_ISL_837804  | 20/08/2020 | Mexico City     | Human | Male    | 44      | Released     | Original | Oropharyngeal swab                    |
| hCoV-19/Mexico/HID-InDRE_291/2020        | EPI_ISL_1060731 | 20/08/2020 | Hidalgo         | Human | Male    | 37      | unknown      | Original | Oropharyngeal swab                    |
| hCoV-19/Mexico/MIC-InDRE-73/2020         | EPI_ISL_576276  | 20/08/2020 | Michoacan       | Human | Male    | 42      | Released     | Original | Oropharyngeal swab                    |
| hCoV-19/Mexico/MIC-InDRE-74/2020         | EPI_ISL_576277  | 20/08/2020 | Michoacan       | Human | Female  | 78      | Released     | Original | Oropharyngeal swab                    |
| hCoV-19/Mexico/BCN-ALSR-4924/2020        | EPI_ISL_730214  | 20/08/2020 | Baja California | Human | unknown | unknown | unknown      | Original | Nasopharyngeal swab                   |
| hCoV-19/Mexico/CMX-INER-0211/2020        | EPI_ISL_837805  | 21/08/2020 | Mexico City     | Human | Female  | 39      | Hospitalized | Original | Oropharyngeal swab                    |
| hCoV-19/Mexico/CAM-InDRE-62/2020         | EPI_ISL_576265  | 21/08/2020 | Campeche        | Human | Male    | 44      | Released     | Original | Oropharyngeal swab                    |
| hCoV-19/Mexico/CAM-InDRE-63/2020         | EPI_ISL_576266  | 21/08/2020 | Campeche        | Human | Male    | 60      | Deceased     | Original | Oropharyngeal swab                    |
| hCoV-19/Mexico/CAM-InDRE-64/2020         | EPI_ISL_576267  | 21/08/2020 | Campeche        | Human | Male    | 64      | Released     | Original | Oropharyngeal swab                    |
| hCoV-19/Mexico/SLP-InDRE-69/2020         | EPI_ISL_576272  | 21/08/2020 | San Luis Potosi | Human | Male    | 31      | Released     | Original | Oropharyngeal swab                    |
| hCoV-19/Mexico/ZAC-InDRE-70/2020         | EPI_ISL_576273  | 21/08/2020 | Zacatecas       | Human | Male    | 26      | Released     | Original | Oropharyngeal swab                    |
| hCoV-19/Mexico/ZAC-InDRE-71/2020         | EPI_ISL_576274  | 21/08/2020 | Zacatecas       | Human | Female  | 25      | Released     | Original | Oropharyngeal swab                    |
| hCoV-19/Mexico/BCN-ALSR-8400/2020        | EPI_ISL_1531864 | 21/08/2020 | Baja California | Human | unknown | unknown | unknown      | Original | Nasal swab                            |
| hCoV-19/Mexico/BCN-ALSR-8401/2020        | EPI_ISL_1531865 | 21/08/2020 | Baja California | Human | unknown | unknown | unknown      | Original | Nasal swab                            |
| hCoV-19/Mexico/BCN-ALSR-8402/2020        | EPI_ISL_1531866 | 21/08/2020 | Baja California | Human | unknown | unknown | unknown      | Original | Nasal swab                            |
| hCoV-19/Mexico/BCN-ALSR-4771/2020        | EPI_ISL_730131  | 22/08/2020 | Baja California | Human | unknown | unknown | unknown      | Original | Nasopharyngeal swab                   |
| hCoV-19/Mexico/BCN-ALSR-4778/2020        | EPI_ISL_730136  | 22/08/2020 | Baja California | Human | unknown | unknown | unknown      | Original | Nasopharyngeal swab                   |
| hCoV-19/Mexico/CMX-INER-0212/2020        | EPI_ISL_837806  | 22/08/2020 | Mexico City     | Human | Female  | 71      | Deceased     | Original | Nasopharyngeal swab                   |
| hCoV-19/Mexico/BCN-ALSR-4762/2020        | EPI_ISL_730127  | 24/08/2020 | Baja California | Human | unknown | unknown | unknown      | Original | Nasopharyngeal swab                   |
| hCoV-19/Mexico/BCN-ALSR-4766/2020        | EPI_ISL_730128  | 24/08/2020 | Baja California | Human | unknown | unknown | unknown      | Original | Nasopharyngeal swab                   |
| hCoV-19/Mexico/BCN-ALSR-4770/2020        | EPI_ISL_730130  | 24/08/2020 | Baja California | Human | unknown | unknown | unknown      | Original | Nasopharyngeal swab                   |
| hCoV-19/Mexico/COL-InDRE-75/2020         | EPI_ISL_576278  | 24/08/2020 | Colima          | Human | Female  | 76      | Deceased     | Original | Oropharyngeal swab                    |
| hCoV-19/Mexico/COL-InDRE-76/2020         | EPI_ISL_576279  | 24/08/2020 | Colima          | Human | Male    | 27      | Released     | Original | Oropharyngeal swab                    |
| hCoV-19/Mexico/BCN-ALSR-8403/2020        | EPI_ISL_1531867 | 24/08/2020 | Baja California | Human | unknown | unknown | unknown      | Original | Nasal swab                            |
| hCoV-19/Mexico/CMX-INER-0213/2020        | EPI_ISL_837603  | 24/08/2020 | Mexico City     | Human | Female  | 54      | Released     | Original | Nasopharyngeal and oropharyngeal swab |
| hCoV-19/Mexico/BCN-ALSR-4768/2020        | EPI_ISL_730129  | 25/08/2020 | Baja California | Human | unknown | unknown | unknown      | Original | Nasopharyngeal swab                   |
| hCoV-19/Mexico/BCN-ALSR-4772/2020        | EPI_ISL_730132  | 25/08/2020 | Baja California | Human | unknown | unknown | unknown      | Original | Nasopharyngeal swab                   |
| hCoV-19/Mexico/BCN-ALSR-4774/2020        | EPI_ISL_730133  | 25/08/2020 | Baja California | Human | unknown | unknown | unknown      | Original | Nasopharyngeal swab                   |
| hCoV-19/Mexico/BCN-ALSR-4775/2020        | EPI_ISL_730134  | 25/08/2020 | Baja California | Human | unknown | unknown | unknown      | Original | Nasopharyngeal swab                   |
| hCoV-19/Mexico/BCN-ALSR-4777/2020        | EPI_ISL_730135  | 25/08/2020 | Baja California | Human | unknown | unknown | unknown      | Original | Nasopharyngeal swab                   |
| hCoV-19/Mexico/CMX-INER-0214/2020        | EPI_ISL_837807  | 25/08/2020 | Mexico City     | Human | Male    | 82      | Released     | Original | Nasopharyngeal and oropharyngeal swab |
| hCoV-19/Mexico/CMX-INER-0215/2020        | EPI_ISL_837808  | 25/08/2020 | Mexico City     | Human | Female  | 70      | Released     | Original | Nasopharyngeal and oropharyngeal swab |

|                                          |                 |            |                 |       |         |         |              |            |                                       |
|------------------------------------------|-----------------|------------|-----------------|-------|---------|---------|--------------|------------|---------------------------------------|
| hCoV-19/Mexico/HID-InDRE-65/2020         | EPI_ISL_576268  | 25/08/2020 | Hidalgo         | Human | Male    | 84      | Deceased     | Original   | Oropharyngeal swab                    |
| hCoV-19/Mexico/BCN-ALSR-4926/2020        | EPI_ISL_730215  | 25/08/2020 | Baja California | Human | unknown | unknown | unknown      | Original   | Nasopharyngeal swab                   |
| hCoV-19/Mexico/BCN-ALSR-4927/2020        | EPI_ISL_730216  | 25/08/2020 | Baja California | Human | unknown | unknown | unknown      | Original   | Nasopharyngeal swab                   |
| hCoV-19/Mexico/BCN-ALSR-4928/2020        | EPI_ISL_730217  | 25/08/2020 | Baja California | Human | unknown | unknown | unknown      | Original   | Nasopharyngeal swab                   |
| hCoV-19/Mexico/BCN-ALSR-4929/2020        | EPI_ISL_730218  | 25/08/2020 | Baja California | Human | unknown | unknown | unknown      | Original   | Nasopharyngeal swab                   |
| hCoV-19/Mexico/GUA-14_LA_FB_05_0336/2020 | EPI_ISL_1238789 | 26/08/2020 | Guanajuato      | Human | Male    | 29      | Released     | Original   | Oropharyngeal swab                    |
| hCoV-19/Mexico/GUA-20_LA_FB_05_0345/2020 | EPI_ISL_1238790 | 26/08/2020 | Guanajuato      | Human | Female  | 29      | Released     | Original   | Oropharyngeal swab                    |
| hCoV-19/Mexico/GUA-26_LA_FB_05_0353/2020 | EPI_ISL_1238791 | 26/08/2020 | Guanajuato      | Human | Female  | 22      | Released     | Original   | Oropharyngeal swab                    |
| hCoV-19/Mexico/BCN-ALSR-4934/2020        | EPI_ISL_730219  | 26/08/2020 | Baja California | Human | unknown | unknown | unknown      | Original   | Nasopharyngeal swab                   |
| hCoV-19/Mexico/BCN-ALSR-4935/2020        | EPI_ISL_730220  | 26/08/2020 | Baja California | Human | unknown | unknown | unknown      | Original   | Nasopharyngeal swab                   |
| hCoV-19/Mexico/BCN-ALSR-8359/2020        | EPI_ISL_1531823 | 26/08/2020 | Baja California | Human | unknown | unknown | unknown      | Original   | Nasal swab                            |
| hCoV-19/Mexico/BCN-ALSR-8404/2020        | EPI_ISL_1531868 | 26/08/2020 | Baja California | Human | unknown | unknown | unknown      | Original   | Nasal swab                            |
| hCoV-19/Mexico/BCN-ALSR-8405/2020        | EPI_ISL_1531869 | 26/08/2020 | Baja California | Human | unknown | unknown | unknown      | Original   | Nasal swab                            |
| hCoV-19/Mexico/BCN-ALSR-8406/2020        | EPI_ISL_1531870 | 26/08/2020 | Baja California | Human | unknown | unknown | unknown      | Original   | Nasal swab                            |
| hCoV-19/Mexico/BCN-ALSR-8407/2020        | EPI_ISL_1531871 | 26/08/2020 | Baja California | Human | unknown | unknown | unknown      | Original   | Nasal swab                            |
| hCoV-19/Mexico/BCN-ALSR-8408/2020        | EPI_ISL_1531872 | 26/08/2020 | Baja California | Human | unknown | unknown | unknown      | Original   | Nasal swab                            |
| hCoV-19/Mexico/CMX-INER-0216/2020        | EPI_ISL_837809  | 27/08/2020 | Mexico City     | Human | Female  | 82      | Deceased     | Original   | Nasopharyngeal and oropharyngeal swab |
| hCoV-19/Mexico/BCN-CICESE-BC2/2020       | EPI_ISL_747242  | 28/08/2020 | Baja California | Human | Female  | 24      | Outpatient   | Vero E6 P1 | Nasopharyngeal swab                   |
| hCoV-19/Mexico/CMX-INER-0217/2020        | EPI_ISL_837602  | 28/08/2020 | Mexico City     | Human | Female  | 70      | Released     | Original   | Nasopharyngeal and oropharyngeal swab |
| hCoV-19/Mexico/BCN-ALSR-4937/2020        | EPI_ISL_730221  | 31/08/2020 | Baja California | Human | unknown | unknown | unknown      | Original   | Nasopharyngeal swab                   |
| hCoV-19/Mexico/BCN-ALSR-8409/2020        | EPI_ISL_1531873 | 31/08/2020 | Baja California | Human | unknown | unknown | unknown      | Original   | Nasal swab                            |
| hCoV-19/Mexico/BCN-ALSR-8410/2020        | EPI_ISL_1531874 | 31/08/2020 | Baja California | Human | unknown | unknown | unknown      | Original   | Nasal swab                            |
| hCoV-19/Mexico/BCN-ALSR-8411/2020        | EPI_ISL_1531875 | 31/08/2020 | Baja California | Human | unknown | unknown | unknown      | Original   | Nasal swab                            |
| hCoV-19/Mexico/BCN-ALSR-8412/2020        | EPI_ISL_1531876 | 01/09/2020 | Baja California | Human | unknown | unknown | unknown      | Original   | Nasal swab                            |
| hCoV-19/Mexico/BCN-ALSR-8413/2020        | EPI_ISL_1531877 | 01/09/2020 | Baja California | Human | unknown | unknown | unknown      | Original   | Nasal swab                            |
| hCoV-19/Mexico/GUA-31_LA_FB_05_0401/2020 | EPI_ISL_1238792 | 02/09/2020 | Guanajuato      | Human | Female  | 38      | Released     | Original   | Oropharyngeal swab                    |
| hCoV-19/Mexico/GUA-35_LA_FB_05_0403/2020 | EPI_ISL_1238793 | 02/09/2020 | Guanajuato      | Human | Male    | 47      | Released     | Original   | Oropharyngeal swab                    |
| hCoV-19/Mexico/CMX-INER-0218/2020        | EPI_ISL_837810  | 02/09/2020 | Mexico City     | Human | Male    | 38      | Released     | Original   | Oropharyngeal swab                    |
| hCoV-19/Mexico/CMX-INER-0219/2020        | EPI_ISL_837811  | 02/09/2020 | Mexico City     | Human | Female  | 64      | Released     | Original   | Nasopharyngeal and oropharyngeal swab |
| hCoV-19/Mexico/BCN-ALSR-8414/2020        | EPI_ISL_1531878 | 02/09/2020 | Baja California | Human | unknown | unknown | unknown      | Original   | Nasal swab                            |
| hCoV-19/Mexico/BCN-ALSR-8415/2020        | EPI_ISL_1531879 | 02/09/2020 | Baja California | Human | unknown | unknown | unknown      | Original   | Nasal swab                            |
| hCoV-19/Mexico/BCN-ALSR-8416/2020        | EPI_ISL_1531880 | 02/09/2020 | Baja California | Human | unknown | unknown | unknown      | Original   | Nasal swab                            |
| hCoV-19/Mexico/BCN-ALSR-8417/2020        | EPI_ISL_1531881 | 02/09/2020 | Baja California | Human | unknown | unknown | unknown      | Original   | Nasal swab                            |
| hCoV-19/Mexico/BCN-ALSR-8418/2020        | EPI_ISL_1531882 | 02/09/2020 | Baja California | Human | unknown | unknown | unknown      | Original   | Nasal swab                            |
| hCoV-19/Mexico/CMX-INER-0220/2020        | EPI_ISL_837812  | 03/09/2020 | Mexico City     | Human | Male    | 33      | Hospitalized | Original   | Nasopharyngeal and oropharyngeal swab |
| hCoV-19/Mexico/CMX-INER-0221/2020        | EPI_ISL_837813  | 03/09/2020 | Mexico City     | Human | Female  | unknown | unknown      | Original   | Nasopharyngeal and oropharyngeal swab |
| hCoV-19/Mexico/CMX-INER-0222/2020        | EPI_ISL_837814  | 03/09/2020 | Mexico City     | Human | Male    | 52      | Hospitalized | Original   | Nasopharyngeal and oropharyngeal swab |
| hCoV-19/Mexico/BCN-ALSR-8419/2020        | EPI_ISL_1531883 | 03/09/2020 | Baja California | Human | unknown | unknown | unknown      | Original   | Nasal swab                            |
| hCoV-19/Mexico/BCN-ALSR-8420/2020        | EPI_ISL_1531884 | 03/09/2020 | Baja California | Human | unknown | unknown | unknown      | Original   | Nasal swab                            |
| hCoV-19/Mexico/BCN-ALSR-8421/2020        | EPI_ISL_1531885 | 03/09/2020 | Baja California | Human | unknown | unknown | unknown      | Original   | Nasal swab                            |
| hCoV-19/Mexico/BCN-ALSR-8422/2020        | EPI_ISL_1531886 | 03/09/2020 | Baja California | Human | unknown | unknown | unknown      | Original   | Nasal swab                            |



|                                    |                 |            |                 |       |         |         |              |            |                     |
|------------------------------------|-----------------|------------|-----------------|-------|---------|---------|--------------|------------|---------------------|
| hCoV-19/Mexico/BCN-ALSR-8423/2020  | EPI_ISL_1531887 | 03/09/2020 | Baja California | Human | unknown | unknown | unknown      | Original   | Nasal swab          |
| hCoV-19/Mexico/BCN-ALSR-8424/2020  | EPI_ISL_1531888 | 03/09/2020 | Baja California | Human | unknown | unknown | unknown      | Original   | Nasal swab          |
| hCoV-19/Mexico/BCN-ALSR-8425/2020  | EPI_ISL_1531889 | 03/09/2020 | Baja California | Human | unknown | unknown | unknown      | Original   | Nasal swab          |
| hCoV-19/Mexico/BCN-ALSR-8426/2020  | EPI_ISL_1531890 | 04/09/2020 | Baja California | Human | unknown | unknown | unknown      | Original   | Nasal swab          |
| hCoV-19/Mexico/BCN-ALSR-8427/2020  | EPI_ISL_1531891 | 04/09/2020 | Baja California | Human | unknown | unknown | unknown      | Original   | Nasal swab          |
| hCoV-19/Mexico/GRO-InDRE-93/2020   | EPI_ISL_658901  | 07/09/2020 | Guerrero        | Human | Female  | 47      | Released     | Original   | Oropharyngeal swab  |
| hCoV-19/Mexico/BCN-ALSR-8428/2020  | EPI_ISL_1531892 | 07/09/2020 | Baja California | Human | unknown | unknown | unknown      | Original   | Nasal swab          |
| hCoV-19/Mexico/BCN-ALSR-8436/2020  | EPI_ISL_1531900 | 08/09/2020 | Baja California | Human | unknown | unknown | unknown      | Original   | Nasal swab          |
| hCoV-19/Mexico/BCN-ALSR-8429/2020  | EPI_ISL_1531893 | 08/09/2020 | Baja California | Human | unknown | unknown | unknown      | Original   | Nasal swab          |
| hCoV-19/Mexico/BCN-ALSR-8430/2020  | EPI_ISL_1531894 | 08/09/2020 | Baja California | Human | unknown | unknown | unknown      | Original   | Nasal swab          |
| hCoV-19/Mexico/BCN-ALSR-8431/2020  | EPI_ISL_1531895 | 08/09/2020 | Baja California | Human | unknown | unknown | unknown      | Original   | Nasal swab          |
| hCoV-19/Mexico/BCN-ALSR-8432/2020  | EPI_ISL_1531896 | 08/09/2020 | Baja California | Human | unknown | unknown | unknown      | Original   | Nasal swab          |
| hCoV-19/Mexico/BCN-ALSR-8433/2020  | EPI_ISL_1531897 | 08/09/2020 | Baja California | Human | unknown | unknown | unknown      | Original   | Nasal swab          |
| hCoV-19/Mexico/BCN-ALSR-8434/2020  | EPI_ISL_1531898 | 08/09/2020 | Baja California | Human | unknown | unknown | unknown      | Original   | Nasal swab          |
| hCoV-19/Mexico/BCN-ALSR-8435/2020  | EPI_ISL_1531899 | 08/09/2020 | Baja California | Human | unknown | unknown | unknown      | Original   | Nasal swab          |
| hCoV-19/Mexico/TAM-UANL-010/2020   | EPI_ISL_1091252 | 09/09/2020 | Tamaulipas      | Human | Male    | 57      | unknown      | Original   |                     |
| hCoV-19/Mexico/TAM-UANL-009/2020   | EPI_ISL_1091269 | 09/09/2020 | Tamaulipas      | Human | Male    | 60      | unknown      | Original   |                     |
| hCoV-19/Mexico/TAM-UANL-003/2020   | EPI_ISL_1091264 | 12/09/2020 | Tamaulipas      | Human | Male    | 50      | unknown      | Original   |                     |
| hCoV-19/Mexico/TAM-UANL-020/2020   | EPI_ISL_1091274 | 17/09/2020 | Tamaulipas      | Human | Male    | 47      | unknown      | Original   |                     |
| hCoV-19/Mexico/BCN-ALSR-8437/2020  | EPI_ISL_1531901 | 17/09/2020 | Baja California | Human | unknown | unknown | unknown      | Original   | Nasal swab          |
| hCoV-19/Mexico/BCN-ALSR-8438/2020  | EPI_ISL_1531902 | 17/09/2020 | Baja California | Human | unknown | unknown | unknown      | Original   | Nasal swab          |
| hCoV-19/Mexico/BCN-ALSR-8439/2020  | EPI_ISL_1531903 | 17/09/2020 | Baja California | Human | unknown | unknown | unknown      | Original   | Nasal swab          |
| hCoV-19/Mexico/TAM-UANL-019/2020   | EPI_ISL_1091260 | 18/09/2020 | Tamaulipas      | Human | Female  | 24      | unknown      | Original   |                     |
| hCoV-19/Mexico/BCN-CICESE-BC5/2020 | EPI_ISL_747243  | 21/09/2020 | Baja California | Human | Male    | 29      | Hospitalized | Vero E6 P1 | Nasopharyngeal swab |
| hCoV-19/Mexico/BCN-ALSR-8440/2020  | EPI_ISL_1531904 | 22/09/2020 | Baja California | Human | unknown | unknown | unknown      | Original   | Nasal swab          |
| hCoV-19/Mexico/BCN-ALSR-8441/2020  | EPI_ISL_1531905 | 22/09/2020 | Baja California | Human | unknown | unknown | unknown      | Original   | Nasal swab          |
| hCoV-19/Mexico/BCN-ALSR-8442/2020  | EPI_ISL_1531906 | 23/09/2020 | Baja California | Human | unknown | unknown | unknown      | Original   | Nasal swab          |
| hCoV-19/Mexico/BCN-ALSR-8443/2020  | EPI_ISL_1531907 | 23/09/2020 | Baja California | Human | unknown | unknown | unknown      | Original   | Nasal swab          |
| hCoV-19/Mexico/BCN-ALSR-8450/2020  | EPI_ISL_1531913 | 23/09/2020 | Baja California | Human | unknown | unknown | unknown      | Original   | Nasal swab          |
| hCoV-19/Mexico/BCN-ALSR-8451/2020  | EPI_ISL_1531914 | 23/09/2020 | Baja California | Human | unknown | unknown | unknown      | Original   | Nasal swab          |
| hCoV-19/Mexico/BCN-ALSR-8452/2020  | EPI_ISL_1531915 | 23/09/2020 | Baja California | Human | unknown | unknown | unknown      | Original   | Nasal swab          |
| hCoV-19/Mexico/BCN-ALSR-8453/2020  | EPI_ISL_1531916 | 23/09/2020 | Baja California | Human | unknown | unknown | unknown      | Original   | Nasal swab          |
| hCoV-19/Mexico/BCN-ALSR-8462/2020  | EPI_ISL_1531925 | 23/09/2020 | Baja California | Human | unknown | unknown | unknown      | Original   | Nasal swab          |
| hCoV-19/Mexico/BCN-ALSR-8471/2020  | EPI_ISL_1531934 | 23/09/2020 | Baja California | Human | unknown | unknown | unknown      | Original   | Nasal swab          |
| hCoV-19/Mexico/BCN-ALSR-8455/2020  | EPI_ISL_1531918 | 24/09/2020 | Baja California | Human | unknown | unknown | unknown      | Original   | Nasal swab          |
| hCoV-19/Mexico/BCN-ALSR-8463/2020  | EPI_ISL_1531926 | 24/09/2020 | Baja California | Human | unknown | unknown | unknown      | Original   | Nasal swab          |
| hCoV-19/Mexico/BCN-ALSR-8456/2020  | EPI_ISL_1531919 | 25/09/2020 | Baja California | Human | unknown | unknown | unknown      | Original   | Nasal swab          |
| hCoV-19/Mexico/BCN-ALSR-8464/2020  | EPI_ISL_1531927 | 25/09/2020 | Baja California | Human | unknown | unknown | unknown      | Original   | Nasal swab          |
| hCoV-19/Mexico/BCN-ALSR-8444/2020  | EPI_ISL_1531908 | 28/09/2020 | Baja California | Human | unknown | unknown | unknown      | Original   | Nasal swab          |
| hCoV-19/Mexico/BCN-ALSR-8445/2020  | EPI_ISL_1531909 | 28/09/2020 | Baja California | Human | unknown | unknown | unknown      | Original   | Nasal swab          |
| hCoV-19/Mexico/BCN-ALSR-8454/2020  | EPI_ISL_1531917 | 28/09/2020 | Baja California | Human | unknown | unknown | unknown      | Original   | Nasal swab          |

|                                           |                 |            |                 |       |         |         |          |          |                    |
|-------------------------------------------|-----------------|------------|-----------------|-------|---------|---------|----------|----------|--------------------|
| hCoV-19/Mexico/BCN-ALSR-8457/2020         | EPI_ISL_1531920 | 28/09/2020 | Baja California | Human | unknown | unknown | unknown  | Original | Nasal swab         |
| hCoV-19/Mexico/BCN-ALSR-8459/2020         | EPI_ISL_1531922 | 28/09/2020 | Baja California | Human | unknown | unknown | unknown  | Original | Nasal swab         |
| hCoV-19/Mexico/BCN-ALSR-8460/2020         | EPI_ISL_1531923 | 28/09/2020 | Baja California | Human | unknown | unknown | unknown  | Original | Nasal swab         |
| hCoV-19/Mexico/TAM-UANL-011/2020          | EPI_ISL_1091270 | 02/10/2020 | Tamaulipas      | Human | Male    | 16      | unknown  | Original |                    |
| hCoV-19/Mexico/BCN-ALSR-8448/2020         | EPI_ISL_1531912 | 02/10/2020 | Baja California | Human | unknown | unknown | unknown  | Original | Nasal swab         |
| hCoV-19/Mexico/BCN-ALSR-8458/2020         | EPI_ISL_1531921 | 02/10/2020 | Baja California | Human | unknown | unknown | unknown  | Original | Nasal swab         |
| hCoV-19/Mexico/BCN-ALSR-8461/2020         | EPI_ISL_1531924 | 02/10/2020 | Baja California | Human | unknown | unknown | unknown  | Original | Nasal swab         |
| hCoV-19/Mexico/TAM-UANL-012/2020          | EPI_ISL_1091271 | 03/10/2020 | Tamaulipas      | Human | Male    | 36      | unknown  | Original |                    |
| hCoV-19/Mexico/TAM-UANL-017/2020          | EPI_ISL_1091247 | 06/10/2020 | Tamaulipas      | Human | Male    | 78      | unknown  | Original |                    |
| hCoV-19/Mexico/BCN-ALSR-8446/2020         | EPI_ISL_1531910 | 08/10/2020 | Baja California | Human | unknown | unknown | unknown  | Original | Nasal swab         |
| hCoV-19/Mexico/BCN-ALSR-8447/2020         | EPI_ISL_1531911 | 08/10/2020 | Baja California | Human | unknown | unknown | unknown  | Original | Nasal swab         |
| hCoV-19/Mexico/AGU-InDRE_F11763B_S1085/20 | EPI_ISL_1516778 | 10/10/2020 | Aguascalientes  | Human | Male    | 43      | unknown  | Original | Oropharyngeal swab |
| hCoV-19/Mexico/TAM-UANL-018/2020          | EPI_ISL_1091273 | 11/10/2020 | Tamaulipas      | Human | Male    | 47      | unknown  | Original |                    |
| hCoV-19/Mexico/TAM-UANL-001/2020          | EPI_ISL_1091263 | 12/10/2020 | Tamaulipas      | Human | Male    | 55      | unknown  | Original |                    |
| hCoV-19/Mexico/CMX-INMEGEN-02-10-23-GRO/2 | EPI_ISL_1137477 | 12/10/2020 | Mexico City     | Human | Male    | 53      | unknown  | Original | Oropharyngeal swab |
| hCoV-19/Mexico/VER-InDRE_116/2020         | EPI_ISL_913920  | 13/10/2020 | Veracruz        | Human | Female  | 35      | unknown  | Original | Oropharyngeal swab |
| hCoV-19/Mexico/VER-InDRE_117/2020         | EPI_ISL_913921  | 13/10/2020 | Veracruz        | Human | Male    | 55      | unknown  | Original | Oropharyngeal swab |
| hCoV-19/Mexico/TAM-InDRE_119/2020         | EPI_ISL_913923  | 13/10/2020 | Tamaulipas      | Human | Male    | 39      | unknown  | Original | Oropharyngeal swab |
| hCoV-19/Mexico/MOR-InDRE_118/2020         | EPI_ISL_913922  | 14/10/2020 | Morelos         | Human | Male    | 46      | unknown  | Original | Oropharyngeal swab |
| hCoV-19/Mexico/GRO-InDRE_120/2020         | EPI_ISL_913924  | 14/10/2020 | Guerrero        | Human | Female  | 28      | unknown  | Original | Oropharyngeal swab |
| hCoV-19/Mexico/TAM-UANL-014/2020          | EPI_ISL_1091258 | 16/10/2020 | Tamaulipas      | Human | Female  | 31      | unknown  | Original |                    |
| hCoV-19/Mexico/TAM-UANL-015/2020          | EPI_ISL_1091259 | 16/10/2020 | Tamaulipas      | Human | Female  | 55      | unknown  | Original |                    |
| hCoV-19/Mexico/BCN-ALSR-8470/2020         | EPI_ISL_1531933 | 16/10/2020 | Baja California | Human | unknown | unknown | unknown  | Original | Nasal swab         |
| hCoV-19/Mexico/CMX-InDRE_166/2020         | EPI_ISL_913967  | 16/10/2020 | Mexico City     | Human | Male    | 28      | Released | Original | Oropharyngeal swab |
| hCoV-19/Mexico/NL-InDRE_122/2020          | EPI_ISL_913926  | 17/10/2020 | Nuevo Leon      | Human | Male    | 15      | Released | Original | Oropharyngeal swab |
| hCoV-19/Mexico/MEX-InDRE_121/2020         | EPI_ISL_913925  | 19/10/2020 | State of Mexico | Human | Male    | 19      | unknown  | Original | Oropharyngeal swab |
| hCoV-19/Mexico/TAM-InDRE_189/2020         | EPI_ISL_933666  | 19/10/2020 | Tamaulipas      | Human | Male    | 36      | unknown  | Original | Oropharyngeal swab |
| hCoV-19/Mexico/HGO-InDRE_123/2020         | EPI_ISL_913927  | 20/10/2020 | Hidalgo         | Human | Female  | 39      | Released | Original | Oropharyngeal swab |
| hCoV-19/Mexico/MEX-InDRE_124/2020         | EPI_ISL_913928  | 20/10/2020 | State of Mexico | Human | Male    | 26      | Released | Original | Oropharyngeal swab |
| hCoV-19/Mexico/MOR-InDRE_155/2020         | EPI_ISL_913957  | 20/10/2020 | Morelos         | Human | Male    | 60      | Released | Original | Oropharyngeal swab |
| hCoV-19/Mexico/TAM-UANL-007/2020          | EPI_ISL_1091267 | 21/10/2020 | Tamaulipas      | Human | Male    | 41      | unknown  | Original |                    |
| hCoV-19/Mexico/BCN-ALSR-8472/2020         | EPI_ISL_1531935 | 21/10/2020 | Baja California | Human | unknown | unknown | unknown  | Original | Nasal swab         |
| hCoV-19/Mexico/TLA-InDRE_126/2020         | EPI_ISL_913929  | 21/10/2020 | Tlaxcala        | Human | Female  | 32      | Released | Original | Oropharyngeal swab |
| hCoV-19/Mexico/VER-InDRE_127/2020         | EPI_ISL_913930  | 21/10/2020 | Veracruz        | Human | Male    | 31      | Released | Original | Oropharyngeal swab |
| hCoV-19/Mexico/PUE-InDRE_128/2020         | EPI_ISL_913931  | 21/10/2020 | Puebla          | Human | Female  | 25      | Released | Original | Oropharyngeal swab |
| hCoV-19/Mexico/PUE-InDRE_129/2020         | EPI_ISL_913932  | 21/10/2020 | Puebla          | Human | Female  | 49      | Released | Original | Oropharyngeal swab |
| hCoV-19/Mexico/PUE-InDRE_190/2020         | EPI_ISL_933667  | 21/10/2020 | Puebla          | Human | Female  | 45      | unknown  | Original | Oropharyngeal swab |
| hCoV-19/Mexico/AGU-InDRE_F11767B_S1089/20 | EPI_ISL_1516781 | 21/10/2020 | Aguascalientes  | Human | Male    | 34      | unknown  | Original | Oropharyngeal swab |
| hCoV-19/Mexico/TAM-UANL-008/2020          | EPI_ISL_1091268 | 22/10/2020 | Tamaulipas      | Human | Male    | 22      | unknown  | Original |                    |
| hCoV-19/Mexico/AGU-InDRE_F11768B_S1090/20 | EPI_ISL_1516782 | 22/10/2020 | Aguascalientes  | Human | unknown | unknown | unknown  | Original | Oropharyngeal swab |
| hCoV-19/Mexico/TAM-UANL-005/2020          | EPI_ISL_1091248 | 29/10/2020 | Tamaulipas      | Human | Female  | 35      | unknown  | Original |                    |

|                                           |                 |            |                 |       |         |         |          |          |                     |
|-------------------------------------------|-----------------|------------|-----------------|-------|---------|---------|----------|----------|---------------------|
| hCoV-19/Mexico/TAM-UANL-004/2020          | EPI_ISL_1091265 | 29/10/2020 | Tamaulipas      | Human | Male    | 57      | unknown  | Original |                     |
| hCoV-19/Mexico/TAM-UANL-006/2020          | EPI_ISL_1091266 | 29/10/2020 | Tamaulipas      | Human | Male    | 38      | unknown  | Original |                     |
| hCoV-19/Mexico/AGS-InDRE-89/2020          | EPI_ISL_658891  | 01/11/2020 | Aguascalientes  | Human | Male    | 37      | Released | Original | Oropharyngeal swab  |
| hCoV-19/Mexico/SLP-InDRE-77/2020          | EPI_ISL_660068  | 01/11/2020 | San Luis Potosi | Human | Male    | 66      | Released | Original | Oropharyngeal swab  |
| hCoV-19/Mexico/AGS-InDRE-78/2020          | EPI_ISL_658863  | 02/11/2020 | Aguascalientes  | Human | Female  | 45      | Released | Original | Oropharyngeal swab  |
| hCoV-19/Mexico/AGS-InDRE-79/2020          | EPI_ISL_658865  | 02/11/2020 | Aguascalientes  | Human | Male    | 28      | Released | Original | Oropharyngeal swab  |
| hCoV-19/Mexico/AGS-InDRE-80/2020          | EPI_ISL_658868  | 02/11/2020 | Aguascalientes  | Human | Male    | 42      | Released | Original | Oropharyngeal swab  |
| hCoV-19/Mexico/AGS-InDRE-81/2020          | EPI_ISL_658870  | 02/11/2020 | Aguascalientes  | Human | Female  | 48      | Released | Original | Oropharyngeal swab  |
| hCoV-19/Mexico/AGS-InDRE-82/2020          | EPI_ISL_658873  | 02/11/2020 | Aguascalientes  | Human | Female  | 19      | Released | Original | Oropharyngeal swab  |
| hCoV-19/Mexico/AGS-InDRE-83/2020          | EPI_ISL_658875  | 02/11/2020 | Aguascalientes  | Human | Female  | 26      | Released | Original | Oropharyngeal swab  |
| hCoV-19/Mexico/QRO-InDRE-84/2020          | EPI_ISL_658878  | 02/11/2020 | Queretaro       | Human | Male    | 23      | Released | Original | Oropharyngeal swab  |
| hCoV-19/Mexico/AGS-InDRE-85/2020          | EPI_ISL_658880  | 02/11/2020 | Aguascalientes  | Human | Male    | 41      | Released | Original | Oropharyngeal swab  |
| hCoV-19/Mexico/AGS-InDRE-86/2020          | EPI_ISL_658883  | 02/11/2020 | Aguascalientes  | Human | Female  | 45      | Released | Original | Oropharyngeal swab  |
| hCoV-19/Mexico/QRO-InDRE-87/2020          | EPI_ISL_658886  | 03/11/2020 | Queretaro       | Human | Female  | 47      | Released | Original | Oropharyngeal swab  |
| hCoV-19/Mexico/QRO-InDRE-88/2020          | EPI_ISL_658888  | 03/11/2020 | Queretaro       | Human | Female  | 44      | Released | Original | Oropharyngeal swab  |
| hCoV-19/Mexico/QRO-InDRE-90/2020          | EPI_ISL_658893  | 03/11/2020 | Queretaro       | Human | Female  | 46      | Released | Original | Oropharyngeal swab  |
| hCoV-19/Mexico/AGU-InDRE_F11765B_S1087/20 | EPI_ISL_1516780 | 04/11/2020 | Aguascalientes  | Human | Female  | 55      | unknown  | Original | Oropharyngeal swab  |
| hCoV-19/Mexico/CMX-InDRE_229/2020         | EPI_ISL_933706  | 06/11/2020 | Mexico City     | Human | Female  | 51      | unknown  | Original | Oropharyngeal swab  |
| hCoV-19/Mexico/AGU-InDRE_F11762B_S1084/20 | EPI_ISL_1516777 | 07/11/2020 | Aguascalientes  | Human | Female  | 69      | unknown  | Original | Oropharyngeal swab  |
| hCoV-19/Mexico/BCN-ALSR-8468/2020         | EPI_ISL_1531931 | 09/11/2020 | Baja California | Human | unknown | unknown | unknown  | Original | Nasal swab          |
| hCoV-19/Mexico/CMX-INMEGEN-01-01-02/2020  | EPI_ISL_1005657 | 09/11/2020 | Mexico City     | Human | Male    | 32      | unknown  | Original | Oropharyngeal swab  |
| hCoV-19/Mexico/CMX-INMEGEN-01-01-03/2020  | EPI_ISL_1005658 | 10/11/2020 | Mexico City     | Human | Male    | 32      | unknown  | Original | Oropharyngeal swab  |
| hCoV-19/Mexico/BCN-ALSR-8474/2020         | EPI_ISL_1531937 | 11/11/2020 | Baja California | Human | unknown | unknown | unknown  | Original | Nasal swab          |
| hCoV-19/Mexico/CMX-INMEGEN-03-11-67/2020  | EPI_ISL_1591520 | 12/11/2020 | Mexico City     | Human | Male    | 16      | unknown  | Original | Oropharyngeal swab  |
| hCoV-19/Mexico/CMX-INCMNSZ_COV121371/2020 | EPI_ISL_1502816 | 13/11/2020 | Mexico City     | Human | Female  | 29      | Released | Original | Nasopharyngeal swab |
| hCoV-19/Mexico/CMX-INMEGEN-02-09-18/2020  | EPI_ISL_1095516 | 13/11/2020 | Mexico City     | Human | Female  | 30      | unknown  | Original | Oropharyngeal swab  |
| hCoV-19/Mexico/NLE-UANL-030/2020          | EPI_ISL_779191  | 14/11/2020 | Nuevo Leon      | Human | Female  | 35      | unknown  | Original |                     |
| hCoV-19/Mexico/NLE-UANL-035/2020          | EPI_ISL_779196  | 16/11/2020 | Nuevo Leon      | Human | Female  | 43      | unknown  | Original |                     |
| hCoV-19/Mexico/SLP-InDRE_130/2020         | EPI_ISL_913933  | 17/11/2020 | San Luis Potosi | Human | Female  | 43      | unknown  | Original | Oropharyngeal swab  |
| hCoV-19/Mexico/AGU-InDRE_F11764B_S1086/20 | EPI_ISL_1516779 | 17/11/2020 | Aguascalientes  | Human | Female  | 36      | unknown  | Original | Oropharyngeal swab  |
| hCoV-19/Mexico/NLE-UANL-026/2020          | EPI_ISL_779188  | 17/11/2020 | Nuevo Leon      | Human | Male    | 54      | unknown  | Original |                     |
| hCoV-19/Mexico/HGO-InDRE_156/2020         | EPI_ISL_913958  | 18/11/2020 | Hidalgo         | Human | Male    | 58      | unknown  | Original | Oropharyngeal swab  |
| hCoV-19/Mexico/CMX-InDRE_230/2020         | EPI_ISL_933707  | 18/11/2020 | Mexico City     | Human | Female  | 31      | unknown  | Original | Oropharyngeal swab  |
| hCoV-19/Mexico/CMX-INMEGEN-12-03-09/2020  | EPI_ISL_955200  | 18/11/2020 | Mexico City     | Human | Male    | 53      | unknown  | Original | Oropharyngeal swab  |
| hCoV-19/Mexico/CMX-INMEGEN-12-03-10/2020  | EPI_ISL_955201  | 18/11/2020 | Mexico City     | Human | Female  | 43      | unknown  | Original | Oropharyngeal swab  |
| hCoV-19/Mexico/CMX-INMEGEN-12-03-11/2020  | EPI_ISL_955202  | 18/11/2020 | Mexico City     | Human | Female  | 61      | unknown  | Original | Oropharyngeal swab  |
| hCoV-19/Mexico/CMX-INMEGEN-12-03-13/2020  | EPI_ISL_955203  | 18/11/2020 | Mexico City     | Human | Female  | 20      | unknown  | Original | Oropharyngeal swab  |
| hCoV-19/Mexico/CMX-INMEGEN-12-03-14/2020  | EPI_ISL_955204  | 18/11/2020 | Mexico City     | Human | Female  | 21      | unknown  | Original | Oropharyngeal swab  |
| hCoV-19/Mexico/CMX-INMEGEN-12-03-15/2020  | EPI_ISL_955205  | 18/11/2020 | Mexico City     | Human | Male    | 62      | unknown  | Original | Oropharyngeal swab  |
| hCoV-19/Mexico/CMX-INMEGEN-12-03-16/2020  | EPI_ISL_955206  | 18/11/2020 | Mexico City     | Human | Male    | 30      | unknown  | Original | Oropharyngeal swab  |
| hCoV-19/Mexico/NLE-UANL-031/2020          | EPI_ISL_779192  | 18/11/2020 | Nuevo Leon      | Human | Male    | 32      | unknown  | Original |                     |

|                                          |                 |            |                 |       |         |         |          |          |                    |
|------------------------------------------|-----------------|------------|-----------------|-------|---------|---------|----------|----------|--------------------|
| hCoV-19/Mexico/CMX-INMEGEN-01-01-07/2020 | EPI_ISL_1005660 | 18/11/2020 | Mexico City     | Human | Female  | 20      | unknown  | Original | Oropharyngeal swab |
| hCoV-19/Mexico/CMX-INMEGEN-12-03-20/2020 | EPI_ISL_955189  | 19/11/2020 | Mexico City     | Human | Male    | 27      | unknown  | Original | Oropharyngeal swab |
| hCoV-19/Mexico/CMX-INMEGEN-12-03-21/2020 | EPI_ISL_955190  | 19/11/2020 | Mexico City     | Human | Male    | 40      | unknown  | Original | Oropharyngeal swab |
| hCoV-19/Mexico/CMX-INMEGEN-12-03-22/2020 | EPI_ISL_955191  | 19/11/2020 | Mexico City     | Human | Male    | 53      | unknown  | Original | Oropharyngeal swab |
| hCoV-19/Mexico/CMX-INMEGEN-12-03-01/2020 | EPI_ISL_955194  | 19/11/2020 | Mexico City     | Human | Male    | 62      | unknown  | Original | Oropharyngeal swab |
| hCoV-19/Mexico/CMX-INMEGEN-12-03-02/2020 | EPI_ISL_955195  | 19/11/2020 | Mexico City     | Human | Female  | 67      | unknown  | Original | Oropharyngeal swab |
| hCoV-19/Mexico/CMX-INMEGEN-12-03-06/2020 | EPI_ISL_955197  | 19/11/2020 | Mexico City     | Human | Male    | 47      | unknown  | Original | Oropharyngeal swab |
| hCoV-19/Mexico/CMX-INMEGEN-12-03-07/2020 | EPI_ISL_955198  | 19/11/2020 | Mexico City     | Human | Male    | 32      | unknown  | Original | Oropharyngeal swab |
| hCoV-19/Mexico/CMX-INMEGEN-12-03-08/2020 | EPI_ISL_955199  | 19/11/2020 | Mexico City     | Human | Male    | 38      | unknown  | Original | Oropharyngeal swab |
| hCoV-19/Mexico/CMX-INMEGEN-12-03-17/2020 | EPI_ISL_955207  | 19/11/2020 | Mexico City     | Human | Female  | 46      | unknown  | Original | Oropharyngeal swab |
| hCoV-19/Mexico/CMX-INMEGEN-12-03-23/2020 | EPI_ISL_955208  | 19/11/2020 | Mexico City     | Human | Female  | 10      | unknown  | Original | Oropharyngeal swab |
| hCoV-19/Mexico/CMX-INMEGEN-12-03-24/2020 | EPI_ISL_955209  | 19/11/2020 | Mexico City     | Human | Female  | 10      | unknown  | Original | Oropharyngeal swab |
| hCoV-19/Mexico/NLE-UANL-022/2020         | EPI_ISL_779185  | 19/11/2020 | Nuevo Leon      | Human | Male    | 54      | unknown  | Original |                    |
| hCoV-19/Mexico/NLE-UANL-023/2020         | EPI_ISL_779186  | 19/11/2020 | Nuevo Leon      | Human | Male    | 24      | unknown  | Original |                    |
| hCoV-19/Mexico/BCN-ALSR-8466/2020        | EPI_ISL_1531929 | 20/11/2020 | Baja California | Human | unknown | unknown | unknown  | Original | Nasal swab         |
| hCoV-19/Mexico/BCN-ALSR-8477/2020        | EPI_ISL_1531940 | 20/11/2020 | Baja California | Human | unknown | unknown | unknown  | Original | Nasal swab         |
| hCoV-19/Mexico/CHP-InDRE_131/2020        | EPI_ISL_913934  | 20/11/2020 | Chiapas         | Human | Male    | 32      | unknown  | Original | Oropharyngeal swab |
| hCoV-19/Mexico/CHP-InDRE_132/2020        | EPI_ISL_913935  | 20/11/2020 | Chiapas         | Human | Male    | 30      | unknown  | Original | Oropharyngeal swab |
| hCoV-19/Mexico/CMX-INMEGEN-11-06/2020    | EPI_ISL_933516  | 20/11/2020 | Mexico City     | Human | Male    | 25      | unknown  | Original | Oropharyngeal swab |
| hCoV-19/Mexico/CMX-INMEGEN-11-08/2020    | EPI_ISL_933518  | 20/11/2020 | Mexico City     | Human | Female  | 49      | unknown  | Original | Oropharyngeal swab |
| hCoV-19/Mexico/CMX-INMEGEN-12-03-05/2020 | EPI_ISL_955192  | 20/11/2020 | Mexico City     | Human | Male    | 69      | unknown  | Original | Oropharyngeal swab |
| hCoV-19/Mexico/CMX-INMEGEN-12-03-12/2020 | EPI_ISL_955193  | 20/11/2020 | Mexico City     | Human | Female  | 25      | unknown  | Original | Oropharyngeal swab |
| hCoV-19/Mexico/CMX-INMEGEN-12-03-04/2020 | EPI_ISL_955196  | 20/11/2020 | Mexico City     | Human | Male    | 31      | unknown  | Original | Oropharyngeal swab |
| hCoV-19/Mexico/CMX-INMEGEN-12-04-01/2020 | EPI_ISL_1005559 | 20/11/2020 | Mexico City     | Human | Male    | 51      | unknown  | Original | Oropharyngeal swab |
| hCoV-19/Mexico/VER-InDRE_169/2020        | EPI_ISL_913970  | 21/11/2020 | Veracruz        | Human | Female  | 68      | Released | Original | Oropharyngeal swab |
| hCoV-19/Mexico/MIC-InDRE_191/2020        | EPI_ISL_933668  | 21/11/2020 | Michoacan       | Human | Female  | 56      | unknown  | Original | Oropharyngeal swab |
| hCoV-19/Mexico/NLE-UANL-037/2020         | EPI_ISL_779198  | 21/11/2020 | Nuevo Leon      | Human | Female  | 51      | unknown  | Original |                    |
| hCoV-19/Mexico/BCN-ALSR-5655/2020        | EPI_ISL_878300  | 23/11/2020 | Baja California | Human | unknown | unknown | unknown  | Original | Nasal swab         |
| hCoV-19/Mexico/QUE-InDRE_294/2020        | EPI_ISL_1060729 | 23/11/2020 | Queretaro       | Human | Male    | 22      | unknown  | Original | Oropharyngeal swab |
| hCoV-19/Mexico/QUE-InDRE_295/2020        | EPI_ISL_1060730 | 23/11/2020 | Queretaro       | Human | Male    | 40      | unknown  | Original | Oropharyngeal swab |
| hCoV-19/Mexico/BCN-ALSR-5748/2020        | EPI_ISL_878400  | 23/11/2020 | Baja California | Human | unknown | unknown | unknown  | Original | Nasal swab         |
| hCoV-19/Mexico/BCN-ALSR-5749/2020        | EPI_ISL_878401  | 23/11/2020 | Baja California | Human | unknown | unknown | unknown  | Original | Nasal swab         |
| hCoV-19/Mexico/BCN-ALSR-5753/2020        | EPI_ISL_878404  | 23/11/2020 | Baja California | Human | unknown | unknown | unknown  | Original | Nasal swab         |
| hCoV-19/Mexico/BCN-ALSR-5757/2020        | EPI_ISL_878408  | 23/11/2020 | Baja California | Human | unknown | unknown | unknown  | Original | Nasal swab         |
| hCoV-19/Mexico/BCN-ALSR-5773/2020        | EPI_ISL_878437  | 23/11/2020 | Baja California | Human | unknown | unknown | unknown  | Original | Nasal swab         |
| hCoV-19/Mexico/CMX-INMEGEN-12-04-09/2020 | EPI_ISL_1005567 | 23/11/2020 | Mexico City     | Human | Female  | 31      | unknown  | Original | Oropharyngeal swab |
| hCoV-19/Mexico/CMX-INMEGEN-12-04-10/2020 | EPI_ISL_1005568 | 23/11/2020 | Mexico City     | Human | Female  | 49      | unknown  | Original | Oropharyngeal swab |
| hCoV-19/Mexico/CMX-INMEGEN-12-04-11/2020 | EPI_ISL_1005569 | 23/11/2020 | Mexico City     | Human | Male    | 47      | unknown  | Original | Oropharyngeal swab |
| hCoV-19/Mexico/CMX-INMEGEN-12-04-12/2020 | EPI_ISL_1005570 | 23/11/2020 | Mexico City     | Human | Female  | 29      | unknown  | Original | Oropharyngeal swab |
| hCoV-19/Mexico/BCN-ALSR-5717/2020        | EPI_ISL_878375  | 24/11/2020 | Baja California | Human | unknown | unknown | unknown  | Original | Nasal swab         |
| hCoV-19/Mexico/BCN-ALSR-5732/2020        | EPI_ISL_878390  | 24/11/2020 | Baja California | Human | unknown | unknown | unknown  | Original | Nasal swab         |



|                                           |                 |            |                     |       |         |         |          |          |                    |
|-------------------------------------------|-----------------|------------|---------------------|-------|---------|---------|----------|----------|--------------------|
| hCoV-19/Mexico/SON-InDRE_135/2020         | EPI_ISL_913938  | 24/11/2020 | Sonora              | Human | Female  | 47      | unknown  | Original | Oropharyngeal swab |
| hCoV-19/Mexico/GUA-InDRE_296/2020         | EPI_ISL_1060728 | 24/11/2020 | Guanajuato          | Human | Female  | 34      | unknown  | Original | Oropharyngeal swab |
| hCoV-19/Mexico/BCN-ALSR-8467/2020         | EPI_ISL_1531930 | 25/11/2020 | Baja California     | Human | unknown | unknown | unknown  | Original | Nasal swab         |
| hCoV-19/Mexico/BCN-ALSR-8473/2020         | EPI_ISL_1531936 | 25/11/2020 | Baja California     | Human | unknown | unknown | unknown  | Original | Nasal swab         |
| hCoV-19/Mexico/BC-InDRE_134/2020          | EPI_ISL_913937  | 25/11/2020 | Baja California     | Human | Female  | 57      | unknown  | Original | Oropharyngeal swab |
| hCoV-19/Mexico/PUE-InDRE_157/2020         | EPI_ISL_913959  | 25/11/2020 | Puebla              | Human | Female  | 44      | unknown  | Original | Oropharyngeal swab |
| hCoV-19/Mexico/AGU-InDRE_F11771B_S1093/20 | EPI_ISL_1516785 | 25/11/2020 | Aguascalientes      | Human | Female  | unknown | unknown  | Original | Oropharyngeal swab |
| hCoV-19/Mexico/BCN-ALSR-8465/2020         | EPI_ISL_1531928 | 26/11/2020 | Baja California     | Human | unknown | unknown | unknown  | Original | Nasal swab         |
| hCoV-19/Mexico/BCN-ALSR-8476/2020         | EPI_ISL_1531939 | 26/11/2020 | Baja California     | Human | unknown | unknown | unknown  | Original | Nasal swab         |
| hCoV-19/Mexico/GRO-InDRE_136/2020         | EPI_ISL_913939  | 26/11/2020 | Guerrero            | Human | Male    | 23      | unknown  | Original | Oropharyngeal swab |
| hCoV-19/Mexico/CMX-INMEGEN-11-02/2020     | EPI_ISL_933512  | 26/11/2020 | Mexico City         | Human | Male    | 34      | unknown  | Original | Oropharyngeal swab |
| hCoV-19/Mexico/CMX-INMEGEN-11-03/2020     | EPI_ISL_933513  | 26/11/2020 | Mexico City         | Human | Female  | 20      | unknown  | Original | Oropharyngeal swab |
| hCoV-19/Mexico/CMX-INMEGEN-11-04/2020     | EPI_ISL_933514  | 26/11/2020 | Mexico City         | Human | Female  | 45      | unknown  | Original | Oropharyngeal swab |
| hCoV-19/Mexico/HID-InDRE_297/2020         | EPI_ISL_1060727 | 26/11/2020 | Hidalgo             | Human | Male    | 55      | Released | Original | Oropharyngeal swab |
| hCoV-19/Mexico/CMX-INMEGEN-11-01/2020     | EPI_ISL_930783  | 26/11/2020 | Mexico City         | Human | Male    | 50      | unknown  | Original | Oropharyngeal swab |
| hCoV-19/Mexico/BCN-ALSR-8469/2020         | EPI_ISL_1531932 | 27/11/2020 | Baja California     | Human | unknown | unknown | unknown  | Original | Nasal swab         |
| hCoV-19/Mexico/BCN-ALSR-8475/2020         | EPI_ISL_1531938 | 27/11/2020 | Baja California     | Human | unknown | unknown | unknown  | Original | Nasal swab         |
| hCoV-19/Mexico/BCS-InDRE_133/2020         | EPI_ISL_913936  | 27/11/2020 | Baja California Sur | Human | Female  | 21      | unknown  | Original | Oropharyngeal swab |
| hCoV-19/Mexico/MEX-InDRE_170/2020         | EPI_ISL_913971  | 27/11/2020 | State of Mexico     | Human | Female  | 52      | unknown  | Original | Oropharyngeal swab |
| hCoV-19/Mexico/CMX-INMEGEN-11-05/2020     | EPI_ISL_933515  | 27/11/2020 | Mexico City         | Human | Female  | 82      | unknown  | Original | Oropharyngeal swab |
| hCoV-19/Mexico/NLE-UANL-027/2020          | EPI_ISL_779189  | 27/11/2020 | Nuevo Leon          | Human | Male    | 26      | unknown  | Original |                    |
| hCoV-19/Mexico/CMX-INMEGEN-11-07/2020     | EPI_ISL_933517  | 28/11/2020 | Mexico City         | Human | Female  | 56      | unknown  | Original | Oropharyngeal swab |
| hCoV-19/Mexico/BCN-ALSR-8478/2020         | EPI_ISL_1531941 | 30/11/2020 | Baja California     | Human | unknown | unknown | unknown  | Original | Nasal swab         |
| hCoV-19/Mexico/BCN-ALSR-5708/2020         | EPI_ISL_878367  | 30/11/2020 | Baja California     | Human | unknown | unknown | unknown  | Original | Nasal swab         |
| hCoV-19/Mexico/CMX-INMEGEN-11-09/2020     | EPI_ISL_933519  | 30/11/2020 | Mexico City         | Human | Female  | 38      | unknown  | Original | Oropharyngeal swab |
| hCoV-19/Mexico/CMX-INMEGEN-11-11/2020     | EPI_ISL_933520  | 30/11/2020 | Mexico City         | Human | Male    | 21      | unknown  | Original | Oropharyngeal swab |
| hCoV-19/Mexico/CMX-INMEGEN-11-12/2020     | EPI_ISL_933521  | 30/11/2020 | Mexico City         | Human | Male    | 25      | unknown  | Original | Oropharyngeal swab |
| hCoV-19/Mexico/CMX-INMEGEN-11-13/2020     | EPI_ISL_933522  | 30/11/2020 | Mexico City         | Human | Male    | 33      | unknown  | Original | Oropharyngeal swab |
| hCoV-19/Mexico/CMX-INMEGEN-11-14/2020     | EPI_ISL_933523  | 30/11/2020 | Mexico City         | Human | Female  | 40      | unknown  | Original | Oropharyngeal swab |
| hCoV-19/Mexico/CMX-INMEGEN-11-15/2020     | EPI_ISL_933524  | 30/11/2020 | Mexico City         | Human | Male    | 15      | unknown  | Original | Oropharyngeal swab |
| hCoV-19/Mexico/CMX-INMEGEN-11-16/2020     | EPI_ISL_933525  | 30/11/2020 | Mexico City         | Human | Female  | 57      | unknown  | Original | Oropharyngeal swab |
| hCoV-19/Mexico/CMX-INMEGEN-11-17/2020     | EPI_ISL_933526  | 30/11/2020 | Mexico City         | Human | Female  | 38      | unknown  | Original | Oropharyngeal swab |
| hCoV-19/Mexico/CMX-INMEGEN-11-18/2020     | EPI_ISL_933527  | 30/11/2020 | Mexico City         | Human | Male    | 35      | unknown  | Original | Oropharyngeal swab |
| hCoV-19/Mexico/CMX-INMEGEN-11-19/2020     | EPI_ISL_933528  | 30/11/2020 | Mexico City         | Human | Female  | 70      | unknown  | Original | Oropharyngeal swab |
| hCoV-19/Mexico/CMX-INMEGEN-11-20/2020     | EPI_ISL_933529  | 30/11/2020 | Mexico City         | Human | Female  | 36      | unknown  | Original | Oropharyngeal swab |
| hCoV-19/Mexico/CMX-INMEGEN-11-21/2020     | EPI_ISL_933530  | 30/11/2020 | Mexico City         | Human | Female  | 63      | unknown  | Original | Oropharyngeal swab |
| hCoV-19/Mexico/CMX-INMEGEN-11-22/2020     | EPI_ISL_933531  | 30/11/2020 | Mexico City         | Human | Female  | 88      | unknown  | Original | Oropharyngeal swab |
| hCoV-19/Mexico/BCN-ALSR-6000/2020         | EPI_ISL_879950  | 30/11/2020 | Baja California     | Human | unknown | unknown | unknown  | Original | Nasal swab         |
| hCoV-19/Mexico/BCN-ALSR-6012/2020         | EPI_ISL_879977  | 30/11/2020 | Baja California     | Human | unknown | unknown | unknown  | Original | Nasal swab         |
| hCoV-19/Mexico/BCN-ALSR-5603/2020         | EPI_ISL_878212  | 01/12/2020 | Baja California     | Human | unknown | unknown | unknown  | Original | Nasal swab         |
| hCoV-19/Mexico/BCN-ALSR-5615/2020         | EPI_ISL_878226  | 01/12/2020 | Baja California     | Human | unknown | unknown | unknown  | Original | Nasal swab         |

|                                           |                 |            |                 |       |         |         |         |          |                    |
|-------------------------------------------|-----------------|------------|-----------------|-------|---------|---------|---------|----------|--------------------|
| hCoV-19/Mexico/TLA-InDRE_174/2020         | EPI_ISL_913975  | 04/12/2020 | Tlaxcala        | Human | Female  | 55      | unknown | Original | Oropharyngeal swab |
| hCoV-19/Mexico/NLE-UANL-032/2020          | EPI_ISL_779193  | 04/12/2020 | Nuevo Leon      | Human | Female  | 60      | unknown | Original |                    |
| hCoV-19/Mexico/NLE-UANL-034/2020          | EPI_ISL_779195  | 05/12/2020 | Nuevo Leon      | Human | Female  | 69      | unknown | Original |                    |
| hCoV-19/Mexico/NLE-UANL-036/2020          | EPI_ISL_779197  | 05/12/2020 | Nuevo Leon      | Human | Male    | 59      | unknown | Original |                    |
| hCoV-19/Mexico/AGU-InDRE_F11770B_S1092/20 | EPI_ISL_1516784 | 06/12/2020 | Aguascalientes  | Human | Female  | unknown | unknown | Original | Oropharyngeal swab |
| hCoV-19/Mexico/OAX-InDRE_171/2020         | EPI_ISL_913972  | 07/12/2020 | Oaxaca          | Human | Male    | 31      | unknown | Original | Oropharyngeal swab |
| hCoV-19/Mexico/BCN-ALSR-6637/2020         | EPI_ISL_1081473 | 07/12/2020 | Baja California | Human | unknown | unknown | unknown | Original | Nasal swab         |
| hCoV-19/Mexico/BCN-ALSR-6638/2020         | EPI_ISL_1081474 | 07/12/2020 | Baja California | Human | unknown | unknown | unknown | Original | Nasal swab         |
| hCoV-19/Mexico/GTO-InDRE_142/2020         | EPI_ISL_913945  | 08/12/2020 | Guanajuato      | Human | Male    | 35      | unknown | Original | Oropharyngeal swab |
| hCoV-19/Mexico/OAX-InDRE_158/2020         | EPI_ISL_913960  | 08/12/2020 | Oaxaca          | Human | Female  | 29      | unknown | Original | Oropharyngeal swab |
| hCoV-19/Mexico/BCN-ALSR-6639/2020         | EPI_ISL_1081475 | 08/12/2020 | Baja California | Human | unknown | unknown | unknown | Original | Nasal swab         |
| hCoV-19/Mexico/BCN-ALSR-6640/2020         | EPI_ISL_1081476 | 08/12/2020 | Baja California | Human | unknown | unknown | unknown | Original | Nasal swab         |
| hCoV-19/Mexico/SON-InDRE_336/2020         | EPI_ISL_1060680 | 08/12/2020 | Sonora          | Human | Female  | 23      | unknown | Original | Oropharyngeal swab |
| hCoV-19/Mexico/MOR-InDRE_137/2020         | EPI_ISL_913940  | 09/12/2020 | Morelos         | Human | Female  | 36      | unknown | Original | Oropharyngeal swab |
| hCoV-19/Mexico/MEX-InDRE_138/2020         | EPI_ISL_913941  | 09/12/2020 | State of Mexico | Human | Female  | 33      | unknown | Original | Oropharyngeal swab |
| hCoV-19/Mexico/BC-InDRE_139/2020          | EPI_ISL_913942  | 09/12/2020 | Baja California | Human | Female  | 53      | unknown | Original | Oropharyngeal swab |
| hCoV-19/Mexico/BC-InDRE_140/2020          | EPI_ISL_913943  | 09/12/2020 | Baja California | Human | Female  | 29      | unknown | Original | Oropharyngeal swab |
| hCoV-19/Mexico/GRO-InDRE_159/2020         | EPI_ISL_913961  | 09/12/2020 | Guerrero        | Human | Female  | 54      | unknown | Original | Oropharyngeal swab |
| hCoV-19/Mexico/MOR-InDRE_172/2020         | EPI_ISL_913973  | 09/12/2020 | Morelos         | Human | Male    | 27      | unknown | Original | Oropharyngeal swab |
| hCoV-19/Mexico/GRO-InDRE_173/2020         | EPI_ISL_913974  | 09/12/2020 | Guerrero        | Human | Male    | 33      | unknown | Original | Oropharyngeal swab |
| hCoV-19/Mexico/CMX-INMEGEN-02-05-07/2020  | EPI_ISL_1075657 | 09/12/2020 | Mexico City     | Human | Male    | 49      | unknown | Original |                    |
| hCoV-19/Mexico/TLA-InDRE_176/2020         | EPI_ISL_913977  | 10/12/2020 | Tlaxcala        | Human | Male    | 25      | unknown | Original | Oropharyngeal swab |
| hCoV-19/Mexico/SLP-InDRE_192/2020         | EPI_ISL_933669  | 10/12/2020 | San Luis Potosi | Human | Female  | 64      | unknown | Original | Oropharyngeal swab |
| hCoV-19/Mexico/CMX-INMEGEN-02-05-06/2020  | EPI_ISL_1060615 | 10/12/2020 | Mexico City     | Human | Male    | 50      | unknown | Original | Oropharyngeal swab |
| hCoV-19/Mexico/BCN-InDRE_335/2020         | EPI_ISL_1060726 | 10/12/2020 | Baja California | Human | Female  | 48      | unknown | Original | Oropharyngeal swab |
| hCoV-19/Mexico/BCN-ALSR-6641/2020         | EPI_ISL_1081477 | 10/12/2020 | Baja California | Human | unknown | unknown | unknown | Original | Nasal swab         |
| hCoV-19/Mexico/BCN-ALSR-6642/2020         | EPI_ISL_1081478 | 10/12/2020 | Baja California | Human | unknown | unknown | unknown | Original | Nasal swab         |
| hCoV-19/Mexico/BCN-ALSR-6643/2020         | EPI_ISL_1081479 | 10/12/2020 | Baja California | Human | unknown | unknown | unknown | Original | Nasal swab         |
| hCoV-19/Mexico/BCN-ALSR-6644/2020         | EPI_ISL_1081480 | 10/12/2020 | Baja California | Human | unknown | unknown | unknown | Original | Nasal swab         |
| hCoV-19/Mexico/BCN-ALSR-6645/2020         | EPI_ISL_1081481 | 10/12/2020 | Baja California | Human | unknown | unknown | unknown | Original | Nasal swab         |
| hCoV-19/Mexico/BCN-ALSR-6646/2020         | EPI_ISL_1081482 | 10/12/2020 | Baja California | Human | unknown | unknown | unknown | Original | Nasal swab         |
| hCoV-19/Mexico/BCN-ALSR-6647/2020         | EPI_ISL_1081483 | 10/12/2020 | Baja California | Human | unknown | unknown | unknown | Original | Nasal swab         |
| hCoV-19/Mexico/BCN-ALSR-6648/2020         | EPI_ISL_1081484 | 10/12/2020 | Baja California | Human | unknown | unknown | unknown | Original | Nasal swab         |
| hCoV-19/Mexico/TLA-InDRE_141/2020         | EPI_ISL_913944  | 11/12/2020 | Tlaxcala        | Human | Male    | 40      | unknown | Original | Oropharyngeal swab |
| hCoV-19/Mexico/GRO-InDRE_163/2020         | EPI_ISL_913964  | 11/12/2020 | Guerrero        | Human | Male    | 29      | unknown | Original | Oropharyngeal swab |
| hCoV-19/Mexico/MOR-InDRE_175/2020         | EPI_ISL_913976  | 11/12/2020 | Morelos         | Human | Male    | 36      | unknown | Original | Oropharyngeal swab |
| hCoV-19/Mexico/CMX-INMEGEN-02-05-08/2020  | EPI_ISL_1060614 | 11/12/2020 | Mexico City     | Human | Male    | 50      | unknown | Original | Oropharyngeal swab |
| hCoV-19/Mexico/BCN-ALSR-6650/2020         | EPI_ISL_1081486 | 11/12/2020 | Baja California | Human | unknown | unknown | unknown | Original | Nasal swab         |
| hCoV-19/Mexico/SLP-InDRE_145/2020         | EPI_ISL_913948  | 12/12/2020 | San Luis Potosi | Human | Female  | 20      | unknown | Original | Oropharyngeal swab |
| hCoV-19/Mexico/GRO-InDRE_146/2020         | EPI_ISL_913949  | 12/12/2020 | Guerrero        | Human | Male    | 36      | unknown | Original | Oropharyngeal swab |
| hCoV-19/Mexico/MEX-InDRE_177/2020         | EPI_ISL_913978  | 12/12/2020 | State of Mexico | Human | Female  | 45      | unknown | Original | Oropharyngeal swab |

|                                   |                 |            |                     |       |         |         |              |          |                    |
|-----------------------------------|-----------------|------------|---------------------|-------|---------|---------|--------------|----------|--------------------|
| hCoV-19/Mexico/BCN-ALSR-6649/2020 | EPI_ISL_1081485 | 12/12/2020 | Baja California     | Human | unknown | unknown | unknown      | Original | Nasal swab         |
| hCoV-19/Mexico/BCN-ALSR-6651/2020 | EPI_ISL_1081487 | 12/12/2020 | Baja California     | Human | unknown | unknown | unknown      | Original | Nasal swab         |
| hCoV-19/Mexico/NLE-UANL-033/2020  | EPI_ISL_779194  | 12/12/2020 | Nuevo Leon          | Human | Female  | 54      | unknown      | Original | Oropharyngeal swab |
| hCoV-19/Mexico/NLE-UANL-028/2020  | EPI_ISL_979329  | 12/12/2020 | Nuevo Leon          | Human | Male    | 21      | unknown      | Original |                    |
| hCoV-19/Mexico/QRO-InDRE_143/2020 | EPI_ISL_913946  | 13/12/2020 | Queretaro           | Human | Male    | 33      | unknown      | Original |                    |
| hCoV-19/Mexico/QRO-InDRE_144/2020 | EPI_ISL_913947  | 13/12/2020 | Queretaro           | Human | Male    | 25      | unknown      | Original |                    |
| hCoV-19/Mexico/HGO-InDRE_148/2020 | EPI_ISL_913951  | 13/12/2020 | Hidalgo             | Human | Female  | 26      | unknown      | Original | Oropharyngeal swab |
| hCoV-19/Mexico/SLP-InDRE_162/2020 | EPI_ISL_913963  | 13/12/2020 | San Luis Potosi     | Human | Male    | 34      | unknown      | Original | Oropharyngeal swab |
| hCoV-19/Mexico/GTO-InDRE_180/2020 | EPI_ISL_913981  | 13/12/2020 | Guanajuato          | Human | Female  | 52      | Hospitalized | Original | Oropharyngeal swab |
| hCoV-19/Mexico/TLA-InDRE_147/2020 | EPI_ISL_913950  | 14/12/2020 | Tlaxcala            | Human | Male    | 39      | unknown      | Original | Oropharyngeal swab |
| hCoV-19/Mexico/CMX-InDRE_160/2020 | EPI_ISL_913962  | 14/12/2020 | Mexico City         | Human | Male    | 33      | Released     | Original | Oropharyngeal swab |
| hCoV-19/Mexico/CMX-InDRE_178/2020 | EPI_ISL_913979  | 14/12/2020 | Mexico City         | Human | Male    | 38      | Released     | Original | Oropharyngeal swab |
| hCoV-19/Mexico/HGO-InDRE_181/2020 | EPI_ISL_913982  | 14/12/2020 | Hidalgo             | Human | Male    | 38      | unknown      | Original | Oropharyngeal swab |
| hCoV-19/Mexico/HGO-InDRE_183/2020 | EPI_ISL_913984  | 14/12/2020 | Hidalgo             | Human | Male    | 26      | unknown      | Original | Oropharyngeal swab |
| hCoV-19/Mexico/BCN-ALSR-6586/2020 | EPI_ISL_1081425 | 14/12/2020 | Baja California     | Human | unknown | unknown | unknown      | Original | Nasal swab         |
| hCoV-19/Mexico/HID-InDRE_161/2020 | EPI_ISL_914880  | 14/12/2020 | Hidalgo             | Human | Female  | 40      | unknown      | Original | Oropharyngeal swab |
| hCoV-19/Mexico/GUA-InDRE_338/2020 | EPI_ISL_1060682 | 14/12/2020 | Guanajuato          | Human | Male    | 32      | unknown      | Original | Oropharyngeal swab |
| hCoV-19/Mexico/GRO-InDRE_332/2020 | EPI_ISL_1060683 | 14/12/2020 | Guerrero            | Human | Male    | 29      | unknown      | Original | Oropharyngeal swab |
| hCoV-19/Mexico/OAX-InDRE_333/2020 | EPI_ISL_1060694 | 14/12/2020 | Oaxaca              | Human | Female  | 18      | unknown      | Original | Oropharyngeal swab |
| hCoV-19/Mexico/TAM-InDRE_149/2020 | EPI_ISL_913952  | 15/12/2020 | Tamaulipas          | Human | Male    | 26      | unknown      | Original | Oropharyngeal swab |
| hCoV-19/Mexico/HGO-InDRE_164/2020 | EPI_ISL_913965  | 15/12/2020 | Hidalgo             | Human | Female  | 36      | unknown      | Original | Oropharyngeal swab |
| hCoV-19/Mexico/TAM-InDRE_165/2020 | EPI_ISL_913966  | 15/12/2020 | Tamaulipas          | Human | Female  | 45      | unknown      | Original | Oropharyngeal swab |
| hCoV-19/Mexico/CMX-InDRE_179/2020 | EPI_ISL_913980  | 15/12/2020 | Mexico City         | Human | Female  | 63      | Released     | Original | Oropharyngeal swab |
| hCoV-19/Mexico/CMX-InDRE_216/2020 | EPI_ISL_933693  | 15/12/2020 | Mexico City         | Human | Female  | 30      | unknown      | Original | Oropharyngeal swab |
| hCoV-19/Mexico/QUE-InDRE_343/2020 | EPI_ISL_1060701 | 15/12/2020 | Queretaro           | Human | Male    | 41      | unknown      | Original | Oropharyngeal swab |
| hCoV-19/Mexico/BCS-InDRE_352/2020 | EPI_ISL_1060705 | 15/12/2020 | Baja California Sur | Human | Male    | 29      | unknown      | Original | Oropharyngeal swab |
| hCoV-19/Mexico/BCS-InDRE_349/2020 | EPI_ISL_1060724 | 15/12/2020 | Baja California Sur | Human | Male    | 60      | unknown      | Original | Oropharyngeal swab |
| hCoV-19/Mexico/AGU-InDRE_354/2020 | EPI_ISL_1060725 | 15/12/2020 | Aguascalientes      | Human | Male    | 63      | unknown      | Original | Oropharyngeal swab |
| hCoV-19/Mexico/BCN-ALSR-6652/2020 | EPI_ISL_1081488 | 15/12/2020 | Baja California     | Human | unknown | unknown | unknown      | Original | Nasal swab         |
| hCoV-19/Mexico/BCN-ALSR-6653/2020 | EPI_ISL_1081489 | 15/12/2020 | Baja California     | Human | unknown | unknown | unknown      | Original | Nasal swab         |
| hCoV-19/Mexico/BCN-ALSR-6654/2020 | EPI_ISL_1081490 | 15/12/2020 | Baja California     | Human | unknown | unknown | unknown      | Original | Nasal swab         |
| hCoV-19/Mexico/BCN-ALSR-6655/2020 | EPI_ISL_1081491 | 15/12/2020 | Baja California     | Human | unknown | unknown | unknown      | Original | Nasal swab         |
| hCoV-19/Mexico/MEX-InDRE_226/2020 | EPI_ISL_933703  | 15/12/2020 | State of Mexico     | Human | Male    | 34      | unknown      | Original | Oropharyngeal swab |
| hCoV-19/Mexico/OAX-InDRE_347/2020 | EPI_ISL_1060691 | 15/12/2020 | Oaxaca              | Human | Male    | 44      | unknown      | Original | Oropharyngeal swab |
| hCoV-19/Mexico/QUE-InDRE_345/2020 | EPI_ISL_1060696 | 15/12/2020 | Queretaro           | Human | Female  | 70      | unknown      | Original | Oropharyngeal swab |
| hCoV-19/Mexico/AGS-InDRE_150/2020 | EPI_ISL_913953  | 16/12/2020 | Aguascalientes      | Human | Male    | 44      | unknown      | Original | Oropharyngeal swab |
| hCoV-19/Mexico/AGS-InDRE_151/2020 | EPI_ISL_913954  | 16/12/2020 | Aguascalientes      | Human | Male    | 20      | unknown      | Original | Oropharyngeal swab |
| hCoV-19/Mexico/AGU-InDRE_195/2020 | EPI_ISL_933672  | 16/12/2020 | Aguascalientes      | Human | Female  | 28      | unknown      | Original | Oropharyngeal swab |
| hCoV-19/Mexico/AGU-InDRE_196/2020 | EPI_ISL_933673  | 16/12/2020 | Aguascalientes      | Human | Male    | 37      | unknown      | Original | Oropharyngeal swab |
| hCoV-19/Mexico/AGU-InDRE_334/2020 | EPI_ISL_1060722 | 16/12/2020 | Aguascalientes      | Human | Male    | 44      | unknown      | Original | Oropharyngeal swab |
| hCoV-19/Mexico/AGU-InDRE_357/2020 | EPI_ISL_1060723 | 16/12/2020 | Aguascalientes      | Human | Female  | 24      | unknown      | Original | Oropharyngeal swab |

|                                          |                 |            |                     |       |         |         |          |          |                    |
|------------------------------------------|-----------------|------------|---------------------|-------|---------|---------|----------|----------|--------------------|
| hCoV-19/Mexico/AGU-InDRE_231/2020        | EPI_ISL_933708  | 16/12/2020 | Aguascalientes      | Human | Female  | 37      | unknown  | Original | Oropharyngeal swab |
| hCoV-19/Mexico/AGU-InDRE_232/2020        | EPI_ISL_933709  | 16/12/2020 | Aguascalientes      | Human | Female  | 56      | unknown  | Original | Oropharyngeal swab |
| hCoV-19/Mexico/CMX-InDRE_235/2020        | EPI_ISL_933712  | 16/12/2020 | Mexico City         | Human | Female  | 21      | unknown  | Original | Oropharyngeal swab |
| hCoV-19/Mexico/CHH-InDRE_366/2020        | EPI_ISL_1060678 | 16/12/2020 | Chihuahua           | Human | Female  | 45      | unknown  | Original | Oropharyngeal swab |
| hCoV-19/Mexico/MOR-InDRE_342/2020        | EPI_ISL_1060679 | 16/12/2020 | Morelos             | Human | Male    | 33      | unknown  | Original | Oropharyngeal swab |
| hCoV-19/Mexico/BCS-InDRE_350/2020        | EPI_ISL_1060681 | 16/12/2020 | Baja California Sur | Human | Female  | 22      | unknown  | Original | Oropharyngeal swab |
| hCoV-19/Mexico/COA-InDRE_355/2020        | EPI_ISL_1060686 | 16/12/2020 | Coahuila            | Human | Male    | 24      | unknown  | Original | Oropharyngeal swab |
| hCoV-19/Mexico/AGU-InDRE_353/2020        | EPI_ISL_1060689 | 16/12/2020 | Aguascalientes      | Human | Female  | 24      | unknown  | Original | Oropharyngeal swab |
| hCoV-19/Mexico/TAM-InDRE_344/2020        | EPI_ISL_1060693 | 16/12/2020 | Tamaulipas          | Human | Female  | 55      | unknown  | Original | Oropharyngeal swab |
| hCoV-19/Mexico/CMX-INMEGEN-01-01-01/2020 | EPI_ISL_1005656 | 16/12/2020 | Mexico City         | Human | Female  | 59      | unknown  | Original | Oropharyngeal swab |
| hCoV-19/Mexico/CMX-INMEGEN-01-01-04/2020 | EPI_ISL_1005659 | 16/12/2020 | Mexico City         | Human | Male    | unknown | unknown  | Original | Oropharyngeal swab |
| hCoV-19/Mexico/VER-InDRE_152/2020        | EPI_ISL_913955  | 17/12/2020 | Veracruz            | Human | Male    | 25      | unknown  | Original | Oropharyngeal swab |
| hCoV-19/Mexico/MEX-InDRE_182/2020        | EPI_ISL_913983  | 17/12/2020 | State of Mexico     | Human | Female  | 36      | Released | Original | Oropharyngeal swab |
| hCoV-19/Mexico/AGU-InDRE_193/2020        | EPI_ISL_933670  | 17/12/2020 | Aguascalientes      | Human | Male    | 57      | unknown  | Original | Oropharyngeal swab |
| hCoV-19/Mexico/AGU-InDRE_194/2020        | EPI_ISL_933671  | 17/12/2020 | Aguascalientes      | Human | Male    | 26      | unknown  | Original | Oropharyngeal swab |
| hCoV-19/Mexico/CMX-InDRE_222/2020        | EPI_ISL_933699  | 17/12/2020 | Mexico City         | Human | Male    | 58      | unknown  | Original | Oropharyngeal swab |
| hCoV-19/Mexico/COA-InDRE_365/2020        | EPI_ISL_1060706 | 17/12/2020 | Coahuila            | Human | Female  | 45      | unknown  | Original | Oropharyngeal swab |
| hCoV-19/Mexico/VER-InDRE_363/2020        | EPI_ISL_1060707 | 17/12/2020 | Veracruz            | Human | Male    | 60      | unknown  | Original | Oropharyngeal swab |
| hCoV-19/Mexico/BCS-InDRE_368/2020        | EPI_ISL_1060720 | 17/12/2020 | Baja California Sur | Human | Female  | 25      | unknown  | Original | Oropharyngeal swab |
| hCoV-19/Mexico/SLP-InDRE_370/2020        | EPI_ISL_1060721 | 17/12/2020 | San Luis Potosi     | Human | Female  | 26      | unknown  | Original | Oropharyngeal swab |
| hCoV-19/Mexico/BCN-ALSR-6584/2020        | EPI_ISL_1081423 | 17/12/2020 | Baja California     | Human | unknown | unknown | unknown  | Original | Nasal swab         |
| hCoV-19/Mexico/BCN-ALSR-6585/2020        | EPI_ISL_1081424 | 17/12/2020 | Baja California     | Human | unknown | unknown | unknown  | Original | Nasal swab         |
| hCoV-19/Mexico/BCN-ALSR-6657/2020        | EPI_ISL_1081492 | 17/12/2020 | Baja California     | Human | unknown | unknown | unknown  | Original | Nasal swab         |
| hCoV-19/Mexico/BCN-ALSR-6658/2020        | EPI_ISL_1081493 | 17/12/2020 | Baja California     | Human | unknown | unknown | unknown  | Original | Nasal swab         |
| hCoV-19/Mexico/BCN-ALSR-6659/2020        | EPI_ISL_1081494 | 17/12/2020 | Baja California     | Human | unknown | unknown | unknown  | Original | Nasal swab         |
| hCoV-19/Mexico/BCN-ALSR-6660/2020        | EPI_ISL_1081495 | 17/12/2020 | Baja California     | Human | unknown | unknown | unknown  | Original | Nasal swab         |
| hCoV-19/Mexico/CMX-InDRE_223/2020        | EPI_ISL_933700  | 17/12/2020 | Mexico City         | Human | Male    | 34      | unknown  | Original | Oropharyngeal swab |
| hCoV-19/Mexico/CMX-InDRE_233/2020        | EPI_ISL_933710  | 17/12/2020 | Mexico City         | Human | Female  | 18      | unknown  | Original | Oropharyngeal swab |
| hCoV-19/Mexico/COA-InDRE_361/2020        | EPI_ISL_1060676 | 17/12/2020 | Coahuila            | Human | Female  | 30      | unknown  | Original | Oropharyngeal swab |
| hCoV-19/Mexico/VER-InDRE_360/2020        | EPI_ISL_1060677 | 17/12/2020 | Veracruz            | Human | Female  | 40      | Released | Original | Oropharyngeal swab |
| hCoV-19/Mexico/AGU-InDRE_351/2020        | EPI_ISL_1060688 | 17/12/2020 | Aguascalientes      | Human | Male    | 21      | unknown  | Original | Oropharyngeal swab |
| hCoV-19/Mexico/SLP-InDRE_367/2020        | EPI_ISL_1060690 | 17/12/2020 | San Luis Potosi     | Human | Male    | 30      | unknown  | Original | Oropharyngeal swab |
| hCoV-19/Mexico/VER-InDRE_362/2020        | EPI_ISL_1060699 | 17/12/2020 | Veracruz            | Human | Female  | 40      | unknown  | Original | Oropharyngeal swab |
| hCoV-19/Mexico/BCS-InDRE_201/2020        | EPI_ISL_933678  | 18/12/2020 | Baja California Sur | Human | Male    | 24      | unknown  | Original | Oropharyngeal swab |
| hCoV-19/Mexico/BCS-InDRE_369/2020        | EPI_ISL_1060703 | 18/12/2020 | Baja California Sur | Human | Female  | 30      | unknown  | Original | Oropharyngeal swab |
| hCoV-19/Mexico/CMX-InDRE_331/2020        | EPI_ISL_1060719 | 18/12/2020 | Mexico City         | Human | Male    | 35      | unknown  | Original | Oropharyngeal swab |
| hCoV-19/Mexico/BCN-ALSR-6587/2020        | EPI_ISL_1081426 | 18/12/2020 | Baja California     | Human | unknown | unknown | unknown  | Original | Nasal swab         |
| hCoV-19/Mexico/BCN-ALSR-6588/2020        | EPI_ISL_1081427 | 18/12/2020 | Baja California     | Human | unknown | unknown | unknown  | Original | Nasal swab         |
| hCoV-19/Mexico/BCN-ALSR-6589/2020        | EPI_ISL_1081428 | 18/12/2020 | Baja California     | Human | unknown | unknown | unknown  | Original | Nasal swab         |
| hCoV-19/Mexico/BCN-ALSR-6590/2020        | EPI_ISL_1081429 | 18/12/2020 | Baja California     | Human | unknown | unknown | unknown  | Original | Nasal swab         |
| hCoV-19/Mexico/BCN-ALSR-6591/2020        | EPI_ISL_1081430 | 18/12/2020 | Baja California     | Human | unknown | unknown | unknown  | Original | Nasal swab         |



|                                          |                 |            |                 |       |         |         |         |          |                    |
|------------------------------------------|-----------------|------------|-----------------|-------|---------|---------|---------|----------|--------------------|
| hCoV-19/Mexico/CMX-INMEGEN-12-04-23/2020 | EPI_ISL_1005581 | 18/12/2020 | Mexico City     | Human | Male    | 69      | unknown | Original | Oropharyngeal swab |
| hCoV-19/Mexico/CMX-INMEGEN-12-04-24/2020 | EPI_ISL_1005582 | 18/12/2020 | Mexico City     | Human | Male    | 31      | unknown | Original | Oropharyngeal swab |
| hCoV-19/Mexico/CMX-InDRE_217/2020        | EPI_ISL_933694  | 19/12/2020 | Mexico City     | Human | Male    | 14      | unknown | Original | Oropharyngeal swab |
| hCoV-19/Mexico/CMX-INMEGEN-02-05-05/2020 | EPI_ISL_1060613 | 19/12/2020 | Mexico City     | Human | Male    | 31      | unknown | Original | Oropharyngeal swab |
| hCoV-19/Mexico/BCN-ALSR-6592/2020        | EPI_ISL_1081431 | 19/12/2020 | Baja California | Human | unknown | unknown | unknown | Original | Nasal swab         |
| hCoV-19/Mexico/BCN-ALSR-6593/2020        | EPI_ISL_1081432 | 19/12/2020 | Baja California | Human | unknown | unknown | unknown | Original | Nasal swab         |
| hCoV-19/Mexico/BCN-ALSR-6594/2020        | EPI_ISL_1081433 | 19/12/2020 | Baja California | Human | unknown | unknown | unknown | Original | Nasal swab         |
| hCoV-19/Mexico/BCN-ALSR-6595/2020        | EPI_ISL_1081434 | 19/12/2020 | Baja California | Human | unknown | unknown | unknown | Original | Nasal swab         |
| hCoV-19/Mexico/BCN-ALSR-6596/2020        | EPI_ISL_1081435 | 19/12/2020 | Baja California | Human | unknown | unknown | unknown | Original | Nasal swab         |
| hCoV-19/Mexico/CMX-InDRE_234/2020        | EPI_ISL_933711  | 19/12/2020 | Mexico City     | Human | Female  | 51      | unknown | Original | Oropharyngeal swab |
| hCoV-19/Mexico/NLE-UANL-024/2020         | EPI_ISL_779187  | 19/12/2020 | Nuevo Leon      | Human | Male    | 56      | unknown | Original |                    |
| hCoV-19/Mexico/NLE-UANL-029/2020         | EPI_ISL_779190  | 19/12/2020 | Nuevo Leon      | Human | Male    | 68      | unknown | Original |                    |
| hCoV-19/Mexico/NLE-UANL-021/2020         | EPI_ISL_979327  | 19/12/2020 | Nuevo Leon      | Human | Male    | 37      | unknown | Original |                    |
| hCoV-19/Mexico/NLE-UANL-025/2020         | EPI_ISL_979328  | 19/12/2020 | Nuevo Leon      | Human | Male    | 18      | unknown | Original |                    |
| hCoV-19/Mexico/CMX-InDRE_197/2020        | EPI_ISL_933674  | 20/12/2020 | Mexico City     | Human | Male    | 34      | unknown | Original | Oropharyngeal swab |
| hCoV-19/Mexico/CMX-InDRE_198/2020        | EPI_ISL_933675  | 20/12/2020 | Mexico City     | Human | Male    | 77      | unknown | Original | Oropharyngeal swab |
| hCoV-19/Mexico/CMX-InDRE_218/2020        | EPI_ISL_933695  | 20/12/2020 | Mexico City     | Human | Female  | 30      | unknown | Original | Oropharyngeal swab |
| hCoV-19/Mexico/CMX-InDRE_219/2020        | EPI_ISL_933696  | 20/12/2020 | Mexico City     | Human | Male    | 59      | unknown | Original | Oropharyngeal swab |
| hCoV-19/Mexico/CMX-InDRE_220/2020        | EPI_ISL_933697  | 20/12/2020 | Mexico City     | Human | Female  | 49      | unknown | Original | Oropharyngeal swab |
| hCoV-19/Mexico/CMX-INMEGEN-02-05-04/2020 | EPI_ISL_1060612 | 20/12/2020 | Mexico City     | Human | Female  | 46      | unknown | Original | Oropharyngeal swab |
| hCoV-19/Mexico/CMX-InDRE_224/2020        | EPI_ISL_933701  | 20/12/2020 | Mexico City     | Human | Male    | 45      | unknown | Original | Oropharyngeal swab |
| hCoV-19/Mexico/CMX-InDRE_225/2020        | EPI_ISL_933702  | 20/12/2020 | Mexico City     | Human | Male    | 8       | unknown | Original | Oropharyngeal swab |
| hCoV-19/Mexico/CMX-InDRE_199/2020        | EPI_ISL_933676  | 21/12/2020 | Mexico City     | Human | Female  | 32      | unknown | Original | Oropharyngeal swab |
| hCoV-19/Mexico/MEX-InDRE_200/2020        | EPI_ISL_933677  | 21/12/2020 | State of Mexico | Human | Male    | 32      | unknown | Original | Oropharyngeal swab |
| hCoV-19/Mexico/CMX-InDRE_221/2020        | EPI_ISL_933698  | 21/12/2020 | Mexico City     | Human | Female  | 46      | unknown | Original | Oropharyngeal swab |
| hCoV-19/Mexico/BCN-ALSR-6597/2020        | EPI_ISL_1081436 | 21/12/2020 | Baja California | Human | unknown | unknown | unknown | Original | Nasal swab         |
| hCoV-19/Mexico/BCN-ALSR-6598/2020        | EPI_ISL_1081437 | 21/12/2020 | Baja California | Human | unknown | unknown | unknown | Original | Nasal swab         |
| hCoV-19/Mexico/BCN-ALSR-6599/2020        | EPI_ISL_1081438 | 21/12/2020 | Baja California | Human | unknown | unknown | unknown | Original | Nasal swab         |
| hCoV-19/Mexico/BCN-ALSR-6600/2020        | EPI_ISL_1081439 | 21/12/2020 | Baja California | Human | unknown | unknown | unknown | Original | Nasal swab         |
| hCoV-19/Mexico/BCN-ALSR-6601/2020        | EPI_ISL_1081440 | 21/12/2020 | Baja California | Human | unknown | unknown | unknown | Original | Nasal swab         |
| hCoV-19/Mexico/BCN-ALSR-6602/2020        | EPI_ISL_1081441 | 21/12/2020 | Baja California | Human | unknown | unknown | unknown | Original | Nasal swab         |
| hCoV-19/Mexico/BCN-ALSR-6603/2020        | EPI_ISL_1081442 | 21/12/2020 | Baja California | Human | unknown | unknown | unknown | Original | Nasal swab         |
| hCoV-19/Mexico/BCN-ALSR-6604/2020        | EPI_ISL_1081443 | 21/12/2020 | Baja California | Human | unknown | unknown | unknown | Original | Nasal swab         |
| hCoV-19/Mexico/CMX-INMEGEN-12-04-02/2020 | EPI_ISL_1005560 | 21/12/2020 | Mexico City     | Human | Male    | 46      | unknown | Original | Oropharyngeal swab |
| hCoV-19/Mexico/CMX-INMEGEN-12-04-03/2020 | EPI_ISL_1005561 | 21/12/2020 | Mexico City     | Human | Female  | 26      | unknown | Original | Oropharyngeal swab |
| hCoV-19/Mexico/CMX-INMEGEN-12-04-04/2020 | EPI_ISL_1005562 | 21/12/2020 | Mexico City     | Human | Female  | 61      | unknown | Original | Oropharyngeal swab |
| hCoV-19/Mexico/CMX-INMEGEN-12-04-05/2020 | EPI_ISL_1005563 | 21/12/2020 | Mexico City     | Human | Male    | 20      | unknown | Original | Oropharyngeal swab |
| hCoV-19/Mexico/CMX-INMEGEN-12-04-06/2020 | EPI_ISL_1005564 | 21/12/2020 | Mexico City     | Human | Female  | 60      | unknown | Original | Oropharyngeal swab |
| hCoV-19/Mexico/CMX-INMEGEN-12-04-07/2020 | EPI_ISL_1005565 | 21/12/2020 | Mexico City     | Human | Female  | 56      | unknown | Original | Oropharyngeal swab |
| hCoV-19/Mexico/CMX-INMEGEN-12-04-08/2020 | EPI_ISL_1005566 | 21/12/2020 | Mexico City     | Human | Female  | 28      | unknown | Original | Oropharyngeal swab |
| hCoV-19/Mexico/CMX-INMEGEN-12-04-21/2020 | EPI_ISL_1005579 | 21/12/2020 | Mexico City     | Human | Male    | 41      | unknown | Original | Oropharyngeal swab |

|                                           |                 |            |                 |       |         |         |         |          |                    |
|-------------------------------------------|-----------------|------------|-----------------|-------|---------|---------|---------|----------|--------------------|
| hCoV-19/Mexico/CMX-INMEGEN-12-04-22/2020  | EPI_ISL_1005580 | 21/12/2020 | Mexico City     | Human | Female  | 36      | unknown | Original | Oropharyngeal swab |
| hCoV-19/Mexico/BCN-ALSR-6605/2020         | EPI_ISL_1081444 | 22/12/2020 | Baja California | Human | unknown | unknown | unknown | Original | Nasal swab         |
| hCoV-19/Mexico/AGU-InDRE_F11769B_S1091/20 | EPI_ISL_1516783 | 22/12/2020 | Aguascalientes  | Human | Female  | 28      | unknown | Original | Oropharyngeal swab |
| hCoV-19/Mexico/CMX-INMEGEN-12-04-14/2020  | EPI_ISL_1005572 | 22/12/2020 | Mexico City     | Human | Male    | 20      | unknown | Original | Oropharyngeal swab |
| hCoV-19/Mexico/CMX-INMEGEN-12-04-15/2020  | EPI_ISL_1005573 | 22/12/2020 | Mexico City     | Human | Female  | 46      | unknown | Original | Oropharyngeal swab |
| hCoV-19/Mexico/CMX-INMEGEN-12-04-16/2020  | EPI_ISL_1005574 | 22/12/2020 | Mexico City     | Human | Male    | 38      | unknown | Original | Oropharyngeal swab |
| hCoV-19/Mexico/CMX-INMEGEN-12-04-20/2020  | EPI_ISL_1005578 | 22/12/2020 | Mexico City     | Human | Male    | 47      | unknown | Original | Oropharyngeal swab |
| hCoV-19/Mexico/BCN-ALSR-6606/2020         | EPI_ISL_1081445 | 23/12/2020 | Baja California | Human | unknown | unknown | unknown | Original | Nasal swab         |
| hCoV-19/Mexico/BCN-ALSR-6607/2020         | EPI_ISL_1081446 | 23/12/2020 | Baja California | Human | unknown | unknown | unknown | Original | Nasal swab         |
| hCoV-19/Mexico/BCN-ALSR-6608/2020         | EPI_ISL_1081447 | 23/12/2020 | Baja California | Human | unknown | unknown | unknown | Original | Nasal swab         |
| hCoV-19/Mexico/BCN-ALSR-6609/2020         | EPI_ISL_1081448 | 23/12/2020 | Baja California | Human | unknown | unknown | unknown | Original | Nasal swab         |
| hCoV-19/Mexico/BCN-ALSR-6610/2020         | EPI_ISL_1081449 | 23/12/2020 | Baja California | Human | unknown | unknown | unknown | Original | Nasal swab         |
| hCoV-19/Mexico/BCN-ALSR-6612/2020         | EPI_ISL_1081451 | 23/12/2020 | Baja California | Human | unknown | unknown | unknown | Original | Nasal swab         |
| hCoV-19/Mexico/CMX-INMEGEN-12-04-13/2020  | EPI_ISL_1005571 | 23/12/2020 | Mexico City     | Human | Male    | 38      | unknown | Original | Oropharyngeal swab |
| hCoV-19/Mexico/CMX-INMEGEN-12-04-17/2020  | EPI_ISL_1005575 | 23/12/2020 | Mexico City     | Human | Male    | 32      | unknown | Original | Oropharyngeal swab |
| hCoV-19/Mexico/CMX-INMEGEN-12-04-18/2020  | EPI_ISL_1005576 | 23/12/2020 | Mexico City     | Human | Male    | 36      | unknown | Original | Oropharyngeal swab |
| hCoV-19/Mexico/CMX-INMEGEN-12-04-19/2020  | EPI_ISL_1005577 | 23/12/2020 | Mexico City     | Human | Female  | 5       | unknown | Original | Oropharyngeal swab |
| hCoV-19/Mexico/NLE-UANL-038/2020          | EPI_ISL_979330  | 24/12/2020 | Nuevo Leon      | Human | Female  | 39      | unknown | Original | Oropharyngeal swab |
| hCoV-19/Mexico/NLE-UANL-039/2020          | EPI_ISL_979331  | 25/12/2020 | Nuevo Leon      | Human | Female  | 48      | unknown | Original |                    |
| hCoV-19/Mexico/CMX-INMEGEN-01-01-24/2020  | EPI_ISL_1005673 | 26/12/2020 | Mexico City     | Human | Male    | 50      | unknown | Original |                    |
| hCoV-19/Mexico/NLE-UANL-040/2020          | EPI_ISL_979332  | 26/12/2020 | Nuevo Leon      | Human | Male    | 48      | unknown | Original |                    |
| hCoV-19/Mexico/NLE-UANL-041/2020          | EPI_ISL_979333  | 26/12/2020 | Nuevo Leon      | Human | Female  | 20      | unknown | Original | Oropharyngeal swab |
| hCoV-19/Mexico/NLE-UANL-042/2020          | EPI_ISL_979334  | 26/12/2020 | Nuevo Leon      | Human | Male    | 34      | unknown | Original |                    |
| hCoV-19/Mexico/CMX-INMEGEN-01-01-17/2020  | EPI_ISL_1005667 | 26/12/2020 | Mexico City     | Human | Female  | 42      | unknown | Original |                    |
| hCoV-19/Mexico/CMX-INMEGEN-01-01-18/2020  | EPI_ISL_1005668 | 26/12/2020 | Mexico City     | Human | Female  | 58      | unknown | Original |                    |
| hCoV-19/Mexico/NLE-UANL-043/2020          | EPI_ISL_979335  | 27/12/2020 | Nuevo Leon      | Human | Female  | 26      | unknown | Original | Oropharyngeal swab |
| hCoV-19/Mexico/NLE-UANL-044/2020          | EPI_ISL_979336  | 27/12/2020 | Nuevo Leon      | Human | Female  | 12      | unknown | Original |                    |
| hCoV-19/Mexico/NLE-UANL-045/2020          | EPI_ISL_979337  | 27/12/2020 | Nuevo Leon      | Human | Male    | 44      | unknown | Original |                    |
| hCoV-19/Mexico/BCN-ALSR-6611/2020         | EPI_ISL_1081450 | 28/12/2020 | Baja California | Human | unknown | unknown | unknown | Original |                    |
| hCoV-19/Mexico/BCN-SEARCH-9176/2020       | EPI_ISL_1794925 | 28/12/2020 | Baja California | Human | unknown | unknown | unknown | Original | Nasal swab         |
| hCoV-19/Mexico/CMX-InDRE_202/2020         | EPI_ISL_933679  | 29/12/2020 | Mexico City     | Human | Male    | 59      | unknown | Original | Oropharyngeal swab |
| hCoV-19/Mexico/BCN-ALSR-6613/2020         | EPI_ISL_1081452 | 29/12/2020 | Baja California | Human | unknown | unknown | unknown | Original | Nasal swab         |
| hCoV-19/Mexico/BCN-ALSR-6614/2020         | EPI_ISL_1081453 | 29/12/2020 | Baja California | Human | unknown | unknown | unknown | Original | Nasal swab         |
| hCoV-19/Mexico/CMX-INMEGEN-01-02-08/2020  | EPI_ISL_985166  | 29/12/2020 | Mexico City     | Human | Male    | 94      | unknown | Original | Oropharyngeal swab |
| hCoV-19/Mexico/CMX-INMEGEN-01-02-05/2020  | EPI_ISL_985167  | 29/12/2020 | Mexico City     | Human | Male    | 13      | unknown | Original | Oropharyngeal swab |
| hCoV-19/Mexico/CMX-INMEGEN-01-01-20/2020  | EPI_ISL_1005669 | 29/12/2020 | Mexico City     | Human | Female  | 15      | unknown | Original | Oropharyngeal swab |
| hCoV-19/Mexico/BCN-ALSR-6616/2020         | EPI_ISL_1081454 | 30/12/2020 | Baja California | Human | unknown | unknown | unknown | Original | Nasal swab         |
| hCoV-19/Mexico/BCN-ALSR-6617/2020         | EPI_ISL_1081455 | 30/12/2020 | Baja California | Human | unknown | unknown | unknown | Original | Nasal swab         |
| hCoV-19/Mexico/BCN-ALSR-6618/2020         | EPI_ISL_1081456 | 30/12/2020 | Baja California | Human | unknown | unknown | unknown | Original | Nasal swab         |
| hCoV-19/Mexico/CMX-INMEGEN-01-02-01/2020  | EPI_ISL_985160  | 30/12/2020 | Mexico City     | Human | Male    | 67      | unknown | Original | Oropharyngeal swab |
| hCoV-19/Mexico/CMX-INMEGEN-01-02-02/2020  | EPI_ISL_985161  | 30/12/2020 | Mexico City     | Human | Male    | 25      | unknown | Original | Oropharyngeal swab |

|                                              |                 |            |                 |       |        |         |              |          |                                       |
|----------------------------------------------|-----------------|------------|-----------------|-------|--------|---------|--------------|----------|---------------------------------------|
| hCoV-19/Mexico/CMX-INMEGEN-01-02-09/2020     | EPI_ISL_985162  | 30/12/2020 | Mexico City     | Human | Female | 67      | unknown      | Original | Oropharyngeal swab                    |
| hCoV-19/Mexico/CMX-INMEGEN-01-02-10/2020     | EPI_ISL_985163  | 30/12/2020 | Mexico City     | Human | Female | 29      | unknown      | Original | Oropharyngeal swab                    |
| hCoV-19/Mexico/CMX-INMEGEN-01-02-12/2020     | EPI_ISL_985164  | 30/12/2020 | Mexico City     | Human | Male   | 38      | unknown      | Original | Oropharyngeal swab                    |
| hCoV-19/Mexico/CMX-INMEGEN-01-02-13/2020     | EPI_ISL_985165  | 30/12/2020 | Mexico City     | Human | Female | 49      | unknown      | Original | Oropharyngeal swab                    |
| hCoV-19/Mexico/CMX-INMEGEN-01-01-22/2020     | EPI_ISL_1005671 | 30/12/2020 | Mexico City     | Human | Female | 28      | unknown      | Original | Oropharyngeal swab                    |
| hCoV-19/Mexico/CMX-INMEGEN-01-01-11/2020     | EPI_ISL_1005661 | 30/12/2020 | Mexico City     | Human | Female | unknown | unknown      | Original | Oropharyngeal swab                    |
| hCoV-19/Mexico/CMX-INMEGEN-01-01-12/2020     | EPI_ISL_1005662 | 30/12/2020 | Mexico City     | Human | Female | 49      | unknown      | Original | Oropharyngeal swab                    |
| hCoV-19/Mexico/CMX-INMEGEN-01-01-13/2020     | EPI_ISL_1005663 | 30/12/2020 | Mexico City     | Human | Male   | 48      | unknown      | Original | Oropharyngeal swab                    |
| hCoV-19/Mexico/CMX-INMEGEN-01-01-14/2020     | EPI_ISL_1005664 | 30/12/2020 | Mexico City     | Human | Female | 37      | unknown      | Original | Oropharyngeal swab                    |
| hCoV-19/Mexico/CMX-INMEGEN-01-01-15/2020     | EPI_ISL_1005665 | 30/12/2020 | Mexico City     | Human | Male   | 36      | unknown      | Original | Oropharyngeal swab                    |
| hCoV-19/Mexico/CMX-INMEGEN-01-01-16/2020     | EPI_ISL_1005666 | 30/12/2020 | Mexico City     | Human | Female | 34      | unknown      | Original | Oropharyngeal swab                    |
| hCoV-19/Mexico/TAM-InDRE-94/2020             | EPI_ISL_794592  | 31/12/2020 | Tamaulipas      | Human | Male   | 56      | Hospitalized | Original | Nasopharyngeal and oropharyngeal swab |
| hCoV-19/Mexico/CMX-INMEGEN-01-02-07/2020     | EPI_ISL_985157  | 31/12/2020 | Mexico City     | Human | Female | 34      | unknown      | Original | Oropharyngeal swab                    |
| hCoV-19/Mexico/CMX-INMEGEN-01-02-14/2020     | EPI_ISL_985158  | 31/12/2020 | Mexico City     | Human | Female | 8       | unknown      | Original | Oropharyngeal swab                    |
| hCoV-19/Mexico/CMX-INMEGEN-01-02-15/2020     | EPI_ISL_985159  | 31/12/2020 | Mexico City     | Human | Male   | 16      | unknown      | Original | Oropharyngeal swab                    |
| hCoV-19/Mexico/NLE-UANL-088/2020             | EPI_ISL_979338  | 31/12/2020 | Nuevo Leon      | Human | Male   | 51      | unknown      | Original |                                       |
| hCoV-19/Mexico/CMX-INMEGEN-01-02-23/2021     | EPI_ISL_985156  | 01/01/2021 | Mexico City     | Human | Female | 39      | unknown      | Original | Oropharyngeal swab                    |
| hCoV-19/Mexico/CMX-INMEGEN-01-01-21/2021     | EPI_ISL_1005670 | 01/01/2021 | Mexico City     | Human | Male   | 61      | unknown      | Original | Oropharyngeal swab                    |
| hCoV-19/Mexico/NLE-UANL-002/2021             | EPI_ISL_979339  | 01/01/2021 | Nuevo Leon      | Human | Male   | 36      | unknown      | Original |                                       |
| hCoV-19/Mexico/VER-InDRE_111/2021            | EPI_ISL_913915  | 02/01/2021 | Veracruz        | Human | Female | 56      | unknown      | Original | Oropharyngeal swab                    |
| hCoV-19/Mexico/VER-InDRE_112/2021            | EPI_ISL_913916  | 02/01/2021 | Veracruz        | Human | Female | 35      | unknown      | Original | Oropharyngeal swab                    |
| hCoV-19/Mexico/CMX-INMEGEN-01-02-18/2021     | EPI_ISL_985153  | 02/01/2021 | Mexico City     | Human | Male   | 14      | unknown      | Original | Oropharyngeal swab                    |
| hCoV-19/Mexico/CMX-INMEGEN-01-02-19/2021     | EPI_ISL_985154  | 02/01/2021 | Mexico City     | Human | Female | 28      | unknown      | Original | Oropharyngeal swab                    |
| hCoV-19/Mexico/CMX-INMEGEN-01-02-20/2021     | EPI_ISL_985155  | 02/01/2021 | Mexico City     | Human | Male   | 26      | unknown      | Original | Oropharyngeal swab                    |
| hCoV-19/Mexico/NLE-UANL-003/2021             | EPI_ISL_979340  | 02/01/2021 | Nuevo Leon      | Human | Female | 25      | unknown      | Original |                                       |
| hCoV-19/Mexico/NLE-UANL-004/2021             | EPI_ISL_979341  | 02/01/2021 | Nuevo Leon      | Human | Male   | 68      | unknown      | Original |                                       |
| hCoV-19/Mexico/NLE-UANL-005/2021             | EPI_ISL_979342  | 03/01/2021 | Nuevo Leon      | Human | Female | 20      | unknown      | Original |                                       |
| hCoV-19/Mexico/CMX-INCMNSZ_COV145587/2021    | EPI_ISL_1502817 | 04/01/2021 | Mexico City     | Human | Female | 56      | Released     | Original | Nasopharyngeal swab                   |
| hCoV-19/Mexico/JAL-LaDEER-133706/2021        | EPI_ISL_1360407 | 04/01/2021 | Jalisco         | Human | Female | 72      | Live         | Original | Oropharyngeal swab                    |
| hCoV-19/Mexico/CMX-INMEGEN-01-03-04/2021     | EPI_ISL_944614  | 04/01/2021 | Mexico City     | Human | Female | 31      | unknown      | Original | Oropharyngeal swab                    |
| hCoV-19/Mexico/CMX-INMEGEN-01-02-22/2021     | EPI_ISL_985150  | 04/01/2021 | Mexico City     | Human | Male   | 40      | unknown      | Original | Oropharyngeal swab                    |
| hCoV-19/Mexico/CMX-INMEGEN-01-02-04/2021     | EPI_ISL_985151  | 04/01/2021 | Mexico City     | Human | Female | 66      | unknown      | Original | Oropharyngeal swab                    |
| hCoV-19/Mexico/CMX-INMEGEN-01-02-21/2021     | EPI_ISL_985152  | 04/01/2021 | Mexico City     | Human | Male   | 21      | unknown      | Original | Oropharyngeal swab                    |
| hCoV-19/Mexico/CMX-INMEGEN-01-01-23/2021     | EPI_ISL_1005672 | 04/01/2021 | Mexico City     | Human | Female | 26      | unknown      | Original | Oropharyngeal swab                    |
| hCoV-19/Mexico/CMX-INMEGEN-02-10-22-GRO/2021 | EPI_ISL_1137459 | 04/01/2021 | Mexico City     | Human | Male   | 30      | unknown      | Original | Oropharyngeal swab                    |
| hCoV-19/Mexico/CMX-INER-SC239/2021           | EPI_ISL_1040927 | 05/01/2021 | Mexico City     | Human | Male   | 53      | Live         | Original | Oropharyngeal swab                    |
| hCoV-19/Mexico/JAL-InDRE_F107G_S583/2021     | EPI_ISL_1324766 | 05/01/2021 | Jalisco         | Human | Female | 71      | Released     | Original | Oropharyngeal swab                    |
| hCoV-19/Mexico/SLP-UASLP-AH1COV2SS019_Si     | EPI_ISL_1494730 | 05/01/2021 | San Luis Potosi | Human | Female | 51      | Released     | Original |                                       |
| hCoV-19/Mexico/CMX-INMEGEN-01-02-16/2021     | EPI_ISL_985149  | 05/01/2021 | Mexico City     | Human | Female | 51      | unknown      | Original | Oropharyngeal swab                    |
| hCoV-19/Mexico/JAL-InDRE_371/2021            | EPI_ISL_1093145 | 06/01/2021 | Jalisco         | Human | Male   | 37      | unknown      | Original | Oropharyngeal swab                    |
| hCoV-19/Mexico/CMX-InDRE_184/2021            | EPI_ISL_933661  | 06/01/2021 | Mexico City     | Human | Female | 50      | unknown      | Original | Oropharyngeal swab                    |

|                                          |                 |            |                 |       |        |    |              |          |                    |
|------------------------------------------|-----------------|------------|-----------------|-------|--------|----|--------------|----------|--------------------|
| hCoV-19/Mexico/CMX-InDRE_185/2021        | EPI_ISL_933662  | 06/01/2021 | Mexico City     | Human | Female | 54 | unknown      | Original | Oropharyngeal swab |
| hCoV-19/Mexico/CMX-InDRE_203/2021        | EPI_ISL_933680  | 06/01/2021 | Mexico City     | Human | Male   | 36 | unknown      | Original | Oropharyngeal swab |
| hCoV-19/Mexico/JAL-LaDEER-139093/2021    | EPI_ISL_1360412 | 06/01/2021 | Jalisco         | Human | Male   | 83 | Live         | Original | Oropharyngeal swab |
| hCoV-19/Mexico/GUA-InDRE_250/2021        | EPI_ISL_1060692 | 06/01/2021 | Guanajuato      | Human | Female | 49 | unknown      | Original | Oropharyngeal swab |
| hCoV-19/Mexico/CMX-InDRE_204/2021        | EPI_ISL_933681  | 07/01/2021 | Mexico City     | Human | Female | 36 | unknown      | Original | Oropharyngeal swab |
| hCoV-19/Mexico/CMX-InDRE_205/2021        | EPI_ISL_933682  | 07/01/2021 | Mexico City     | Human | Male   | 35 | unknown      | Original | Oropharyngeal swab |
| hCoV-19/Mexico/CMX-InDRE_206/2021        | EPI_ISL_933683  | 07/01/2021 | Mexico City     | Human | Male   | 36 | unknown      | Original | Oropharyngeal swab |
| hCoV-19/Mexico/CMX-InDRE_207/2021        | EPI_ISL_933684  | 07/01/2021 | Mexico City     | Human | Male   | 49 | unknown      | Original | Oropharyngeal swab |
| hCoV-19/Mexico/CMX-InDRE_208/2021        | EPI_ISL_933685  | 07/01/2021 | Mexico City     | Human | Female | 36 | unknown      | Original | Oropharyngeal swab |
| hCoV-19/Mexico/CMX-InDRE_209/2021        | EPI_ISL_933686  | 07/01/2021 | Mexico City     | Human | Male   | 60 | unknown      | Original | Oropharyngeal swab |
| hCoV-19/Mexico/CMX-InDRE_210/2021        | EPI_ISL_933687  | 07/01/2021 | Mexico City     | Human | Female | 16 | unknown      | Original | Oropharyngeal swab |
| hCoV-19/Mexico/CMX-InDRE_211/2021        | EPI_ISL_933688  | 07/01/2021 | Mexico City     | Human | Female | 17 | unknown      | Original | Oropharyngeal swab |
| hCoV-19/Mexico/CMX-InDRE_212/2021        | EPI_ISL_933689  | 07/01/2021 | Mexico City     | Human | Female | 76 | unknown      | Original | Oropharyngeal swab |
| hCoV-19/Mexico/GUA-InDRE_251/2021        | EPI_ISL_1060718 | 07/01/2021 | Guanajuato      | Human | Male   | 27 | unknown      | Original | Oropharyngeal swab |
| hCoV-19/Mexico/CMX-InDRE_227/2021        | EPI_ISL_933704  | 07/01/2021 | Mexico City     | Human | Female | 27 | unknown      | Original | Oropharyngeal swab |
| hCoV-19/Mexico/CMX-InDRE_213/2021        | EPI_ISL_933690  | 08/01/2021 | Mexico City     | Human | Female | 46 | unknown      | Original | Oropharyngeal swab |
| hCoV-19/Mexico/CMX-InDRE_214/2021        | EPI_ISL_933691  | 08/01/2021 | Mexico City     | Human | Male   | 58 | unknown      | Original | Oropharyngeal swab |
| hCoV-19/Mexico/MEX-InDRE_215/2021        | EPI_ISL_933692  | 08/01/2021 | State of Mexico | Human | Female | 25 | unknown      | Original | Oropharyngeal swab |
| hCoV-19/Mexico/SLP-UASLP-AH1COV2SS017_S  | EPI_ISL_1494728 | 08/01/2021 | San Luis Potosi | Human | Female | 59 | Released     | Original |                    |
| hCoV-19/Mexico/MEX-InDRE_228/2021        | EPI_ISL_933705  | 08/01/2021 | State of Mexico | Human | Female | 26 | unknown      | Original | Oropharyngeal swab |
| hCoV-19/Mexico/CMX-INMEGEN-01-03-14/2021 | EPI_ISL_944624  | 08/01/2021 | Mexico City     | Human | Female | 21 | unknown      | Original | Oropharyngeal swab |
| hCoV-19/Mexico/CMX-INMEGEN-01-03-15/2021 | EPI_ISL_944625  | 08/01/2021 | Mexico City     | Human | Female | 62 | unknown      | Original | Oropharyngeal swab |
| hCoV-19/Mexico/NLE-UANL-006/2021         | EPI_ISL_979343  | 08/01/2021 | Nuevo Leon      | Human | Female | 41 | unknown      | Original |                    |
| hCoV-19/Mexico/NLE-UANL-007/2021         | EPI_ISL_979344  | 08/01/2021 | Nuevo Leon      | Human | Male   | 51 | unknown      | Original |                    |
| hCoV-19/Mexico/NLE-UANL-008/2021         | EPI_ISL_979345  | 08/01/2021 | Nuevo Leon      | Human | Female | 30 | unknown      | Original |                    |
| hCoV-19/Mexico/SLP-InDRE_454/2021        | EPI_ISL_1219714 | 08/01/2021 | San Luis Potosi | Human | Female | 53 | Released     | Original | Oropharyngeal swab |
| hCoV-19/Mexico/CMX-INMEGEN-03-03-03/2021 | EPI_ISL_1298453 | 08/01/2021 | Mexico City     | Human | Female | 28 | unknown      | Original | Oropharyngeal swab |
| hCoV-19/Mexico/CMX-InDRE_186/2021        | EPI_ISL_933663  | 09/01/2021 | Mexico City     | Human | Male   | 56 | unknown      | Original | Oropharyngeal swab |
| hCoV-19/Mexico/NLE-UANL-009/2021         | EPI_ISL_979346  | 09/01/2021 | Nuevo Leon      | Human | Male   | 20 | unknown      | Original |                    |
| hCoV-19/Mexico/NLE-UANL-010/2021         | EPI_ISL_979347  | 09/01/2021 | Nuevo Leon      | Human | Male   | 52 | unknown      | Original |                    |
| hCoV-19/Mexico/NLE-UANL-011/2021         | EPI_ISL_979348  | 09/01/2021 | Nuevo Leon      | Human | Male   | 68 | unknown      | Original |                    |
| hCoV-19/Mexico/NLE-UANL-012/2021         | EPI_ISL_979349  | 09/01/2021 | Nuevo Leon      | Human | Male   | 25 | unknown      | Original |                    |
| hCoV-19/Mexico/NLE-UANL-013/2021         | EPI_ISL_979350  | 09/01/2021 | Nuevo Leon      | Human | Male   | 17 | unknown      | Original |                    |
| hCoV-19/Mexico/CMX-INMEGEN-01-03-13/2021 | EPI_ISL_944623  | 10/01/2021 | Mexico City     | Human | Female | 20 | unknown      | Original | Oropharyngeal swab |
| hCoV-19/Mexico/NLE-UANL-014/2021         | EPI_ISL_979351  | 10/01/2021 | Nuevo Leon      | Human | Male   | 49 | unknown      | Original |                    |
| hCoV-19/Mexico/NLE-UANL-015/2021         | EPI_ISL_979352  | 10/01/2021 | Nuevo Leon      | Human | Female | 47 | unknown      | Original |                    |
| hCoV-19/Mexico/JAL-InDRE_372/2021        | EPI_ISL_1093146 | 11/01/2021 | Jalisco         | Human | Male   | 60 | unknown      | Original | Oropharyngeal swab |
| hCoV-19/Mexico/SLP-UASLP-AH1COV2SS018_S  | EPI_ISL_1494729 | 11/01/2021 | San Luis Potosi | Human | Male   | 38 | Hospitalized | Original |                    |
| hCoV-19/Mexico/CMX-INMEGEN-01-03-01/2021 | EPI_ISL_944611  | 11/01/2021 | Mexico City     | Human | Female | 62 | unknown      | Original | Oropharyngeal swab |
| hCoV-19/Mexico/CMX-INMEGEN-01-03-02/2021 | EPI_ISL_944612  | 11/01/2021 | Mexico City     | Human | Male   | 67 | unknown      | Original | Oropharyngeal swab |
| hCoV-19/Mexico/CMX-INMEGEN-01-03-03/2021 | EPI_ISL_944613  | 11/01/2021 | Mexico City     | Human | Male   | 48 | unknown      | Original | Oropharyngeal swab |

|                                           |                 |            |                 |       |         |         |          |          |                     |
|-------------------------------------------|-----------------|------------|-----------------|-------|---------|---------|----------|----------|---------------------|
| hCoV-19/Mexico/CMX-INMEGEN-01-03-05/2021  | EPI_ISL_944615  | 11/01/2021 | Mexico City     | Human | Female  | 69      | unknown  | Original | Oropharyngeal swab  |
| hCoV-19/Mexico/CMX-INMEGEN-01-03-06/2021  | EPI_ISL_944616  | 11/01/2021 | Mexico City     | Human | Female  | 47      | unknown  | Original | Oropharyngeal swab  |
| hCoV-19/Mexico/CMX-INMEGEN-01-03-09/2021  | EPI_ISL_944619  | 11/01/2021 | Mexico City     | Human | Female  | 53      | unknown  | Original | Oropharyngeal swab  |
| hCoV-19/Mexico/CMX-INMEGEN-01-03-17/2021  | EPI_ISL_944627  | 11/01/2021 | Mexico City     | Human | Male    | 46      | unknown  | Original | Oropharyngeal swab  |
| hCoV-19/Mexico/CMX-INMEGEN-01-03-18/2021  | EPI_ISL_944628  | 11/01/2021 | Mexico City     | Human | Male    | 52      | unknown  | Original | Oropharyngeal swab  |
| hCoV-19/Mexico/CMX-INMEGEN-01-03-21/2021  | EPI_ISL_944631  | 11/01/2021 | Mexico City     | Human | Female  | 40      | unknown  | Original | Oropharyngeal swab  |
| hCoV-19/Mexico/CMX-INMEGEN-01-03-23/2021  | EPI_ISL_944633  | 11/01/2021 | Mexico City     | Human | Female  | 10      | unknown  | Original | Oropharyngeal swab  |
| hCoV-19/Mexico/CMX-INMEGEN-01-03-07/2021  | EPI_ISL_944617  | 12/01/2021 | Mexico City     | Human | Male    | 32      | unknown  | Original | Oropharyngeal swab  |
| hCoV-19/Mexico/CMX-INMEGEN-01-03-12/2021  | EPI_ISL_944622  | 12/01/2021 | Mexico City     | Human | Male    | 25      | unknown  | Original | Oropharyngeal swab  |
| hCoV-19/Mexico/CMX-INMEGEN-01-03-16/2021  | EPI_ISL_944626  | 12/01/2021 | Mexico City     | Human | Male    | 30      | unknown  | Original | Oropharyngeal swab  |
| hCoV-19/Mexico/BCN-ALSR-6339/2021         | EPI_ISL_962662  | 12/01/2021 | Baja California | Human | unknown | unknown | unknown  | Original | Nasal swab          |
| hCoV-19/Mexico/BCN-ALSR-6340/2021         | EPI_ISL_962663  | 12/01/2021 | Baja California | Human | unknown | unknown | unknown  | Original | Nasal swab          |
| hCoV-19/Mexico/GUA-InDRE_252/2021         | EPI_ISL_1060704 | 13/01/2021 | Guanajuato      | Human | Male    | 35      | unknown  | Original | Oropharyngeal swab  |
| hCoV-19/Mexico/CMX-INMEGEN-01-03-19/2021  | EPI_ISL_944629  | 13/01/2021 | Mexico City     | Human | Female  | 61      | unknown  | Original | Oropharyngeal swab  |
| hCoV-19/Mexico/CMX-INMEGEN-01-03-20/2021  | EPI_ISL_944630  | 13/01/2021 | Mexico City     | Human | Male    | 27      | unknown  | Original | Oropharyngeal swab  |
| hCoV-19/Mexico/CMX-InDRE_242/2021         | EPI_ISL_942928  | 13/01/2021 | Mexico City     | Human | Male    | 48      | Released | Original | Oropharyngeal swab  |
| hCoV-19/Mexico/TAM-InDRE_236/2021         | EPI_ISL_961466  | 13/01/2021 | Tamaulipas      | Human | Female  | 70      | Released | Original | Oropharyngeal swab  |
| hCoV-19/Mexico/CMX-INMEGEN-01-04-15/2021  | EPI_ISL_1040561 | 14/01/2021 | Mexico City     | Human | Female  | 74      | unknown  | Original | Nasopharyngeal swab |
| hCoV-19/Mexico/CMX-INMEGEN-01-05-17/2021  | EPI_ISL_1040598 | 14/01/2021 | Mexico City     | Human | Female  | 83      | unknown  | Original | Nasopharyngeal swab |
| hCoV-19/Mexico/CMX-INMEGEN-01-03-08/2021  | EPI_ISL_944618  | 14/01/2021 | Mexico City     | Human | Female  | 38      | unknown  | Original | Oropharyngeal swab  |
| hCoV-19/Mexico/CMX-INMEGEN-01-03-10/2021  | EPI_ISL_944620  | 14/01/2021 | Mexico City     | Human | Female  | 43      | unknown  | Original | Oropharyngeal swab  |
| hCoV-19/Mexico/CMX-INMEGEN-01-03-11/2021  | EPI_ISL_944621  | 14/01/2021 | Mexico City     | Human | Female  | 61      | unknown  | Original | Oropharyngeal swab  |
| hCoV-19/Mexico/CMX-INMEGEN-01-03-22/2021  | EPI_ISL_944632  | 14/01/2021 | Mexico City     | Human | Male    | 53      | unknown  | Original | Oropharyngeal swab  |
| hCoV-19/Mexico/QUE-InDRE_246/2021         | EPI_ISL_1060697 | 14/01/2021 | Queretaro       | Human | Female  | 34      | unknown  | Original | Oropharyngeal swab  |
| hCoV-19/Mexico/CMX-INMEGEN-01-04-11/2021  | EPI_ISL_1040560 | 15/01/2021 | Mexico City     | Human | Male    | 58      | unknown  | Original | Nasopharyngeal swab |
| hCoV-19/Mexico/CMX-INMEGEN-01-04-12/2021  | EPI_ISL_1040562 | 15/01/2021 | Mexico City     | Human | Female  | 58      | unknown  | Original | Nasopharyngeal swab |
| hCoV-19/Mexico/CMX-INMEGEN-01-04-16/2021  | EPI_ISL_1040563 | 15/01/2021 | Mexico City     | Human | Female  | 21      | unknown  | Original | Nasopharyngeal swab |
| hCoV-19/Mexico/CMX-INMEGEN-01-05-02/2021  | EPI_ISL_1040593 | 15/01/2021 | Mexico City     | Human | Male    | 47      | unknown  | Original | Nasopharyngeal swab |
| hCoV-19/Mexico/CMX-INMEGEN-01-05-03/2021  | EPI_ISL_1040594 | 15/01/2021 | Mexico City     | Human | Male    | 25      | unknown  | Original | Nasopharyngeal swab |
| hCoV-19/Mexico/CMX-INMEGEN-01-05-09/2021  | EPI_ISL_1040595 | 15/01/2021 | Mexico City     | Human | Female  | 39      | unknown  | Original | Nasopharyngeal swab |
| hCoV-19/Mexico/CMX-INMEGEN-01-05-10/2021  | EPI_ISL_1040596 | 15/01/2021 | Mexico City     | Human | Male    | 37      | unknown  | Original | Nasopharyngeal swab |
| hCoV-19/Mexico/CMX-INMEGEN-01-05-18/2021  | EPI_ISL_1040597 | 15/01/2021 | Mexico City     | Human | Female  | 3       | unknown  | Original | Nasopharyngeal swab |
| hCoV-19/Mexico/NLE-UANL-016/2021          | EPI_ISL_1091241 | 15/01/2021 | Nuevo Leon      | Human | Female  | 40      | unknown  | Original |                     |
| hCoV-19/Mexico/NLE-UANL-019/2021          | EPI_ISL_1091253 | 15/01/2021 | Nuevo Leon      | Human | Male    | 63      | unknown  | Original |                     |
| hCoV-19/Mexico/NLE-UANL-017/2021          | EPI_ISL_1091254 | 15/01/2021 | Nuevo Leon      | Human | Female  | 53      | unknown  | Original |                     |
| hCoV-19/Mexico/NLE-UANL-018/2021          | EPI_ISL_1091262 | 15/01/2021 | Nuevo Leon      | Human | Male    | 29      | unknown  | Original |                     |
| hCoV-19/Mexico/CMX-INCMNSZ_COV149517/2021 | EPI_ISL_1502814 | 15/01/2021 | Mexico City     | Human | unknown | unknown | Released | Original | Nasopharyngeal swab |
| hCoV-19/Mexico/NLE-UANL-020/2021          | EPI_ISL_1092458 | 15/01/2021 | Nuevo Leon      | Human | Male    | 86      | unknown  | Original |                     |
| hCoV-19/Mexico/COL-InDRE_545/2021         | EPI_ISL_1168615 | 15/01/2021 | Colima          | Human | Female  | 72      | Deceased | Original | Oropharyngeal swab  |
| hCoV-19/Mexico/JAL-InDRE_549/2021         | EPI_ISL_1168619 | 15/01/2021 | Jalisco         | Human | Male    | 26      | Released | Original | Oropharyngeal swab  |
| hCoV-19/Mexico/JAL-InDRE_550/2021         | EPI_ISL_1168620 | 15/01/2021 | Jalisco         | Human | Male    | 78      | Live     | Original | Oropharyngeal swab  |



|                                          |                 |            |                     |       |        |    |              |          |                     |
|------------------------------------------|-----------------|------------|---------------------|-------|--------|----|--------------|----------|---------------------|
| hCoV-19/Mexico/JAL-InDRE_551/2021        | EPI_ISL_1168621 | 15/01/2021 | Jalisco             | Human | Male   | 62 | Released     | Original | Oropharyngeal swab  |
| hCoV-19/Mexico/JAL-InDRE_552/2021        | EPI_ISL_1168622 | 15/01/2021 | Jalisco             | Human | Female | 70 | Released     | Original | Oropharyngeal swab  |
| hCoV-19/Mexico/JAL-InDRE_553/2021        | EPI_ISL_1168623 | 15/01/2021 | Jalisco             | Human | Male   | 26 | Released     | Original | Oropharyngeal swab  |
| hCoV-19/Mexico/MOR-InDRE_462/2021        | EPI_ISL_1168532 | 15/01/2021 | Morelos             | Human | Male   | 18 | Released     | Original | Oropharyngeal swab  |
| hCoV-19/Mexico/MOR-InDRE_463/2021        | EPI_ISL_1168533 | 15/01/2021 | Morelos             | Human | Male   | 67 | Hospitalized | Original | Oropharyngeal swab  |
| hCoV-19/Mexico/MOR-InDRE_464/2021        | EPI_ISL_1168534 | 15/01/2021 | Morelos             | Human | Male   | 84 | Released     | Original | Oropharyngeal swab  |
| hCoV-19/Mexico/MOR-InDRE_465/2021        | EPI_ISL_1168535 | 15/01/2021 | Morelos             | Human | Female | 54 | Released     | Original | Oropharyngeal swab  |
| hCoV-19/Mexico/JAL-InDRE_482/2021        | EPI_ISL_1168552 | 15/01/2021 | Jalisco             | Human | Female | 33 | Released     | Original | Oropharyngeal swab  |
| hCoV-19/Mexico/COA-InDRE_505/2021        | EPI_ISL_1168575 | 15/01/2021 | Coahuila            | Human | Female | 36 | Released     | Original | Oropharyngeal swab  |
| hCoV-19/Mexico/COA-InDRE_506/2021        | EPI_ISL_1168576 | 15/01/2021 | Coahuila            | Human | Male   | 31 | Released     | Original | Oropharyngeal swab  |
| hCoV-19/Mexico/COA-InDRE_507/2021        | EPI_ISL_1168577 | 15/01/2021 | Coahuila            | Human | Female | 46 | Released     | Original | Oropharyngeal swab  |
| hCoV-19/Mexico/COA-InDRE_508/2021        | EPI_ISL_1168578 | 15/01/2021 | Coahuila            | Human | Male   | 63 | Released     | Original | Oropharyngeal swab  |
| hCoV-19/Mexico/COA-InDRE_509/2021        | EPI_ISL_1168579 | 15/01/2021 | Coahuila            | Human | Female | 56 | Deceased     | Original | Oropharyngeal swab  |
| hCoV-19/Mexico/COA-InDRE_510/2021        | EPI_ISL_1168580 | 15/01/2021 | Coahuila            | Human | Male   | 68 | Hospitalized | Original | Oropharyngeal swab  |
| hCoV-19/Mexico/COA-InDRE_511/2021        | EPI_ISL_1168581 | 15/01/2021 | Coahuila            | Human | Male   | 47 | Released     | Original | Oropharyngeal swab  |
| hCoV-19/Mexico/COA-InDRE_512/2021        | EPI_ISL_1168582 | 15/01/2021 | Coahuila            | Human | Male   | 61 | Released     | Original | Oropharyngeal swab  |
| hCoV-19/Mexico/COA-InDRE_516/2021        | EPI_ISL_1168586 | 15/01/2021 | Coahuila            | Human | Male   | 32 | Released     | Original | Oropharyngeal swab  |
| hCoV-19/Mexico/COA-InDRE_517/2021        | EPI_ISL_1168587 | 15/01/2021 | Coahuila            | Human | Male   | 71 | Deceased     | Original | Oropharyngeal swab  |
| hCoV-19/Mexico/NLE-InDRE_403/2021        | EPI_ISL_1168481 | 15/01/2021 | Nuevo Leon          | Human | Female | 59 | Released     | Original | Oropharyngeal swab  |
| hCoV-19/Mexico/VER-InDRE_416/2021        | EPI_ISL_1168494 | 15/01/2021 | Veracruz            | Human | Female | 52 | Live         | Original | Oropharyngeal swab  |
| hCoV-19/Mexico/CMX-INMEGEN-01-04-02/2021 | EPI_ISL_1040564 | 16/01/2021 | Mexico City         | Human | Male   | 23 | unknown      | Original | Nasopharyngeal swab |
| hCoV-19/Mexico/CMX-INMEGEN-01-05-01/2021 | EPI_ISL_1040591 | 16/01/2021 | Mexico City         | Human | Female | 37 | unknown      | Original | Nasopharyngeal swab |
| hCoV-19/Mexico/CMX-INMEGEN-01-05-04/2021 | EPI_ISL_1040592 | 16/01/2021 | Mexico City         | Human | Female | 47 | unknown      | Original | Nasopharyngeal swab |
| hCoV-19/Mexico/NLE-UANL-021/2021         | EPI_ISL_1091255 | 16/01/2021 | Nuevo Leon          | Human | Female | 20 | unknown      | Original |                     |
| hCoV-19/Mexico/SLP_UASLP_A002/2021       | EPI_ISL_1469112 | 16/01/2021 | San Luis Potosi     | Human | Male   | 21 | Released     | Original | Oropharyngeal swab  |
| hCoV-19/Mexico/HID-InDRE_460/2021        | EPI_ISL_1168530 | 16/01/2021 | Hidalgo             | Human | Male   | 63 | Live         | Original | Oropharyngeal swab  |
| hCoV-19/Mexico/HID-InDRE_461/2021        | EPI_ISL_1168531 | 16/01/2021 | Hidalgo             | Human | Female | 31 | Live         | Original | Oropharyngeal swab  |
| hCoV-19/Mexico/MOR-InDRE_466/2021        | EPI_ISL_1168536 | 16/01/2021 | Morelos             | Human | Male   | 67 | Hospitalized | Original | Oropharyngeal swab  |
| hCoV-19/Mexico/MEX-InDRE_467/2021        | EPI_ISL_1168537 | 16/01/2021 | State of Mexico     | Human | Male   | 65 | Hospitalized | Original | Oropharyngeal swab  |
| hCoV-19/Mexico/BCS-InDRE_468/2021        | EPI_ISL_1168538 | 16/01/2021 | Baja California Sur | Human | Female | 25 | Released     | Original | Oropharyngeal swab  |
| hCoV-19/Mexico/QUE-InDRE_473/2021        | EPI_ISL_1168543 | 16/01/2021 | Queretaro           | Human | Male   | 34 | Released     | Original | Oropharyngeal swab  |
| hCoV-19/Mexico/QUE-InDRE_474/2021        | EPI_ISL_1168544 | 16/01/2021 | Queretaro           | Human | Female | 30 | Released     | Original | Oropharyngeal swab  |
| hCoV-19/Mexico/QUE-InDRE_475/2021        | EPI_ISL_1168545 | 16/01/2021 | Queretaro           | Human | Male   | 58 | Released     | Original | Oropharyngeal swab  |
| hCoV-19/Mexico/QUE-InDRE_476/2021        | EPI_ISL_1168546 | 16/01/2021 | Queretaro           | Human | Female | 61 | Released     | Original | Oropharyngeal swab  |
| hCoV-19/Mexico/QUE-InDRE_477/2021        | EPI_ISL_1168547 | 16/01/2021 | Queretaro           | Human | Female | 35 | Released     | Original | Oropharyngeal swab  |
| hCoV-19/Mexico/QUE-InDRE_478/2021        | EPI_ISL_1168548 | 16/01/2021 | Queretaro           | Human | Female | 32 | Released     | Original | Oropharyngeal swab  |
| hCoV-19/Mexico/QUE-InDRE_479/2021        | EPI_ISL_1168549 | 16/01/2021 | Queretaro           | Human | Male   | 18 | Released     | Original | Oropharyngeal swab  |
| hCoV-19/Mexico/COA-InDRE_483/2021        | EPI_ISL_1168553 | 16/01/2021 | Coahuila            | Human | Male   | 23 | Released     | Original | Oropharyngeal swab  |
| hCoV-19/Mexico/COA-InDRE_484/2021        | EPI_ISL_1168554 | 16/01/2021 | Coahuila            | Human | Female | 13 | Released     | Original | Oropharyngeal swab  |
| hCoV-19/Mexico/COA-InDRE_485/2021        | EPI_ISL_1168555 | 16/01/2021 | Coahuila            | Human | Male   | 73 | Released     | Original | Oropharyngeal swab  |
| hCoV-19/Mexico/VER-InDRE_414/2021        | EPI_ISL_1168492 | 16/01/2021 | Veracruz            | Human | Male   | 62 | Live         | Original | Oropharyngeal swab  |

|                                          |                 |            |                     |       |        |    |              |          |                     |
|------------------------------------------|-----------------|------------|---------------------|-------|--------|----|--------------|----------|---------------------|
| hCoV-19/Mexico/CMX-INMEGEN-01-04-13/2021 | EPI_ISL_1040565 | 17/01/2021 | Mexico City         | Human | Female | 58 | unknown      | Original | Nasopharyngeal swab |
| hCoV-19/Mexico/CMX-INMEGEN-02-01-02/2021 | EPI_ISL_1040621 | 17/01/2021 | Mexico City         | Human | Female | 63 | unknown      | Original | Nasopharyngeal swab |
| hCoV-19/Mexico/CMX-INMEGEN-02-01-03/2021 | EPI_ISL_1040622 | 17/01/2021 | Mexico City         | Human | Female | 91 | unknown      | Original | Nasopharyngeal swab |
| hCoV-19/Mexico/CAM-InDRE_544/2021        | EPI_ISL_1168614 | 17/01/2021 | Campeche            | Human | Male   | 59 | Deceased     | Original | Oropharyngeal swab  |
| hCoV-19/Mexico/BCS-InDRE_469/2021        | EPI_ISL_1168539 | 17/01/2021 | Baja California Sur | Human | Male   | 43 | Released     | Original | Oropharyngeal swab  |
| hCoV-19/Mexico/BCS-InDRE_470/2021        | EPI_ISL_1168540 | 17/01/2021 | Baja California Sur | Human | Female | 78 | Released     | Original | Oropharyngeal swab  |
| hCoV-19/Mexico/BCS-InDRE_471/2021        | EPI_ISL_1168541 | 17/01/2021 | Baja California Sur | Human | Male   | 43 | Released     | Original | Oropharyngeal swab  |
| hCoV-19/Mexico/BCS-InDRE_472/2021        | EPI_ISL_1168542 | 17/01/2021 | Baja California Sur | Human | Male   | 84 | Released     | Original | Oropharyngeal swab  |
| hCoV-19/Mexico/QUE-InDRE_480/2021        | EPI_ISL_1168550 | 17/01/2021 | Queretaro           | Human | Female | 51 | Deceased     | Original | Oropharyngeal swab  |
| hCoV-19/Mexico/COA-InDRE_486/2021        | EPI_ISL_1168556 | 17/01/2021 | Coahuila            | Human | Female | 36 | Released     | Original | Oropharyngeal swab  |
| hCoV-19/Mexico/COA-InDRE_487/2021        | EPI_ISL_1168557 | 17/01/2021 | Coahuila            | Human | Male   | 26 | Released     | Original | Oropharyngeal swab  |
| hCoV-19/Mexico/COA-InDRE_488/2021        | EPI_ISL_1168558 | 17/01/2021 | Coahuila            | Human | Male   | 70 | Hospitalized | Original | Oropharyngeal swab  |
| hCoV-19/Mexico/COA-InDRE_489/2021        | EPI_ISL_1168559 | 17/01/2021 | Coahuila            | Human | Female | 57 | Released     | Original | Oropharyngeal swab  |
| hCoV-19/Mexico/COA-InDRE_490/2021        | EPI_ISL_1168560 | 17/01/2021 | Coahuila            | Human | Male   | 63 | Deceased     | Original | Oropharyngeal swab  |
| hCoV-19/Mexico/COA-InDRE_513/2021        | EPI_ISL_1168583 | 17/01/2021 | Coahuila            | Human | Female | 74 | Released     | Original | Oropharyngeal swab  |
| hCoV-19/Mexico/MOR-InDRE_522/2021        | EPI_ISL_1168592 | 17/01/2021 | Morelos             | Human | Male   | 58 | Released     | Original | Oropharyngeal swab  |
| hCoV-19/Mexico/NLE-InDRE_390/2021        | EPI_ISL_1168468 | 17/01/2021 | Nuevo Leon          | Human | Female | 52 | Released     | Original | Oropharyngeal swab  |
| hCoV-19/Mexico/NLE-InDRE_394/2021        | EPI_ISL_1168472 | 17/01/2021 | Nuevo Leon          | Human | Female | 36 | Released     | Original | Oropharyngeal swab  |
| hCoV-19/Mexico/NLE-InDRE_398/2021        | EPI_ISL_1168476 | 17/01/2021 | Nuevo Leon          | Human | Male   | 52 | Released     | Original | Oropharyngeal swab  |
| hCoV-19/Mexico/NLE-InDRE_405/2021        | EPI_ISL_1168483 | 17/01/2021 | Nuevo Leon          | Human | Male   | 49 | Released     | Original | Oropharyngeal swab  |
| hCoV-19/Mexico/JAL-InDRE_419/2021        | EPI_ISL_1168497 | 17/01/2021 | Jalisco             | Human | Female | 36 | Released     | Original | Oropharyngeal swab  |
| hCoV-19/Mexico/CMX-INMEGEN-01-04-05/2021 | EPI_ISL_1040566 | 18/01/2021 | Mexico City         | Human | Male   | 11 | unknown      | Original | Nasopharyngeal swab |
| hCoV-19/Mexico/CMX-INMEGEN-01-04-06/2021 | EPI_ISL_1040567 | 18/01/2021 | Mexico City         | Human | Female | 40 | unknown      | Original | Nasopharyngeal swab |
| hCoV-19/Mexico/CMX-INMEGEN-01-04-08/2021 | EPI_ISL_1040568 | 18/01/2021 | Mexico City         | Human | Female | 61 | unknown      | Original | Nasopharyngeal swab |
| hCoV-19/Mexico/CMX-INMEGEN-01-04-09/2021 | EPI_ISL_1040569 | 18/01/2021 | Mexico City         | Human | Male   | 54 | unknown      | Original | Nasopharyngeal swab |
| hCoV-19/Mexico/CMX-INMEGEN-01-04-14/2021 | EPI_ISL_1040570 | 18/01/2021 | Mexico City         | Human | Male   | 38 | unknown      | Original | Nasopharyngeal swab |
| hCoV-19/Mexico/CMX-INMEGEN-01-04-17/2021 | EPI_ISL_1040571 | 18/01/2021 | Mexico City         | Human | Male   | 20 | unknown      | Original | Nasopharyngeal swab |
| hCoV-19/Mexico/CMX-INMEGEN-01-04-18/2021 | EPI_ISL_1040572 | 18/01/2021 | Mexico City         | Human | Female | 31 | unknown      | Original | Nasopharyngeal swab |
| hCoV-19/Mexico/CMX-INMEGEN-01-05-07/2021 | EPI_ISL_1040580 | 18/01/2021 | Mexico City         | Human | Male   | 26 | unknown      | Original | Nasopharyngeal swab |
| hCoV-19/Mexico/CMX-INMEGEN-01-05-05/2021 | EPI_ISL_1040587 | 18/01/2021 | Mexico City         | Human | Male   | 55 | unknown      | Original | Nasopharyngeal swab |
| hCoV-19/Mexico/CMX-INMEGEN-01-05-14/2021 | EPI_ISL_1040588 | 18/01/2021 | Mexico City         | Human | Male   | 68 | unknown      | Original | Nasopharyngeal swab |
| hCoV-19/Mexico/CMX-INMEGEN-01-05-15/2021 | EPI_ISL_1040589 | 18/01/2021 | Mexico City         | Human | Female | 52 | unknown      | Original | Nasopharyngeal swab |
| hCoV-19/Mexico/CMX-INMEGEN-01-05-16/2021 | EPI_ISL_1040590 | 18/01/2021 | Mexico City         | Human | Male   | 21 | unknown      | Original | Nasopharyngeal swab |
| hCoV-19/Mexico/JAL-InDRE_373/2021        | EPI_ISL_1093147 | 18/01/2021 | Jalisco             | Human | Female | 78 | unknown      | Original | Oropharyngeal swab  |
| hCoV-19/Mexico/CAM-InDRE_543/2021        | EPI_ISL_1168613 | 18/01/2021 | Campeche            | Human | Female | 32 | Live         | Original | Oropharyngeal swab  |
| hCoV-19/Mexico/COL-InDRE_546/2021        | EPI_ISL_1168616 | 18/01/2021 | Colima              | Human | Male   | 34 | Live         | Original | Oropharyngeal swab  |
| hCoV-19/Mexico/COL-InDRE_547/2021        | EPI_ISL_1168617 | 18/01/2021 | Colima              | Human | Male   | 57 | Deceased     | Original | Oropharyngeal swab  |
| hCoV-19/Mexico/COL-InDRE_548/2021        | EPI_ISL_1168618 | 18/01/2021 | Colima              | Human | Male   | 69 | Live         | Original | Oropharyngeal swab  |
| hCoV-19/Mexico/JAL-LaDEER-145365/2021    | EPI_ISL_1360409 | 18/01/2021 | Jalisco             | Human | Female | 19 | Live         | Original | Oropharyngeal swab  |
| hCoV-19/Mexico/JAL-LaDEER-147248/2021    | EPI_ISL_1360410 | 18/01/2021 | Jalisco             | Human | Female | 18 | Live         | Original | Oropharyngeal swab  |
| hCoV-19/Mexico/JAL-InDRE_422/2021        | EPI_ISL_1168500 | 18/01/2021 | Jalisco             | Human | Female | 34 | Released     | Original | Oropharyngeal swab  |

|                                          |                 |            |             |       |        |    |          |          |                     |
|------------------------------------------|-----------------|------------|-------------|-------|--------|----|----------|----------|---------------------|
| hCoV-19/Mexico/CHP-InDRE_443/2021        | EPI_ISL_1168521 | 18/01/2021 | Chiapas     | Human | Female | 76 | Live     | Original | Oropharyngeal swab  |
| hCoV-19/Mexico/HID-InDRE_459/2021        | EPI_ISL_1168529 | 18/01/2021 | Hidalgo     | Human | Male   | 40 | Live     | Original | Oropharyngeal swab  |
| hCoV-19/Mexico/HID-InDRE_481/2021        | EPI_ISL_1168551 | 18/01/2021 | Hidalgo     | Human | Female | 53 | Released | Original | Oropharyngeal swab  |
| hCoV-19/Mexico/COA-InDRE_491/2021        | EPI_ISL_1168561 | 18/01/2021 | Coahuila    | Human | Male   | 46 | Released | Original | Oropharyngeal swab  |
| hCoV-19/Mexico/COA-InDRE_492/2021        | EPI_ISL_1168562 | 18/01/2021 | Coahuila    | Human | Female | 25 | Released | Original | Oropharyngeal swab  |
| hCoV-19/Mexico/COA-InDRE_493/2021        | EPI_ISL_1168563 | 18/01/2021 | Coahuila    | Human | Female | 33 | Released | Original | Oropharyngeal swab  |
| hCoV-19/Mexico/COA-InDRE_494/2021        | EPI_ISL_1168564 | 18/01/2021 | Coahuila    | Human | Male   | 39 | Released | Original | Oropharyngeal swab  |
| hCoV-19/Mexico/COA-InDRE_495/2021        | EPI_ISL_1168565 | 18/01/2021 | Coahuila    | Human | Male   | 38 | Released | Original | Oropharyngeal swab  |
| hCoV-19/Mexico/COA-InDRE_496/2021        | EPI_ISL_1168566 | 18/01/2021 | Coahuila    | Human | Male   | 62 | Live     | Original | Oropharyngeal swab  |
| hCoV-19/Mexico/COA-InDRE_497/2021        | EPI_ISL_1168567 | 18/01/2021 | Coahuila    | Human | Female | 35 | Released | Original | Oropharyngeal swab  |
| hCoV-19/Mexico/COA-InDRE_498/2021        | EPI_ISL_1168568 | 18/01/2021 | Coahuila    | Human | Male   | 44 | Released | Original | Oropharyngeal swab  |
| hCoV-19/Mexico/YUC-InDRE_500/2021        | EPI_ISL_1168570 | 18/01/2021 | Yucatan     | Human | Female | 31 | Released | Original | Oropharyngeal swab  |
| hCoV-19/Mexico/YUC-InDRE_501/2021        | EPI_ISL_1168571 | 18/01/2021 | Yucatan     | Human | Female | 41 | Released | Original | Oropharyngeal swab  |
| hCoV-19/Mexico/YUC-InDRE_502/2021        | EPI_ISL_1168572 | 18/01/2021 | Yucatan     | Human | Female | 29 | Released | Original | Oropharyngeal swab  |
| hCoV-19/Mexico/YUC-InDRE_503/2021        | EPI_ISL_1168573 | 18/01/2021 | Yucatan     | Human | Male   | 46 | Released | Original | Oropharyngeal swab  |
| hCoV-19/Mexico/YUC-InDRE_504/2021        | EPI_ISL_1168574 | 18/01/2021 | Yucatan     | Human | Male   | 45 | Released | Original | Oropharyngeal swab  |
| hCoV-19/Mexico/NLE-InDRE_239/2021        | EPI_ISL_942927  | 18/01/2021 | Nuevo Leon  | Human | Female | 15 | Released | Original | Oropharyngeal swab  |
| hCoV-19/Mexico/NLE-InDRE_391/2021        | EPI_ISL_1168469 | 18/01/2021 | Nuevo Leon  | Human | Female | 32 | Released | Original | Oropharyngeal swab  |
| hCoV-19/Mexico/NLE-InDRE_397/2021        | EPI_ISL_1168475 | 18/01/2021 | Nuevo Leon  | Human | Male   | 64 | Released | Original | Oropharyngeal swab  |
| hCoV-19/Mexico/NLE-InDRE_401/2021        | EPI_ISL_1168479 | 18/01/2021 | Nuevo Leon  | Human | Female | 24 | Released | Original | Oropharyngeal swab  |
| hCoV-19/Mexico/NLE-InDRE_402/2021        | EPI_ISL_1168480 | 18/01/2021 | Nuevo Leon  | Human | Female | 32 | Released | Original | Oropharyngeal swab  |
| hCoV-19/Mexico/COA-InDRE_406/2021        | EPI_ISL_1168484 | 18/01/2021 | Coahuila    | Human | Female | 70 | Released | Original | Oropharyngeal swab  |
| hCoV-19/Mexico/COA-InDRE_407/2021        | EPI_ISL_1168485 | 18/01/2021 | Coahuila    | Human | Male   | 54 | Released | Original | Oropharyngeal swab  |
| hCoV-19/Mexico/COA-InDRE_408/2021        | EPI_ISL_1168486 | 18/01/2021 | Coahuila    | Human | Male   | 70 | Released | Original | Oropharyngeal swab  |
| hCoV-19/Mexico/COA-InDRE_409/2021        | EPI_ISL_1168487 | 18/01/2021 | Coahuila    | Human | Female | 17 | Released | Original | Oropharyngeal swab  |
| hCoV-19/Mexico/COA-InDRE_410/2021        | EPI_ISL_1168488 | 18/01/2021 | Coahuila    | Human | Male   | 29 | Released | Original | Oropharyngeal swab  |
| hCoV-19/Mexico/COA-InDRE_411/2021        | EPI_ISL_1168489 | 18/01/2021 | Coahuila    | Human | Male   | 58 | Released | Original | Oropharyngeal swab  |
| hCoV-19/Mexico/COA-InDRE_412/2021        | EPI_ISL_1168490 | 18/01/2021 | Coahuila    | Human | Male   | 31 | Deceased | Original | Oropharyngeal swab  |
| hCoV-19/Mexico/VER-InDRE_415/2021        | EPI_ISL_1168493 | 18/01/2021 | Veracruz    | Human | Female | 80 | Live     | Original | Oropharyngeal swab  |
| hCoV-19/Mexico/JAL-InDRE_420/2021        | EPI_ISL_1168498 | 18/01/2021 | Jalisco     | Human | Male   | 23 | Released | Original | Oropharyngeal swab  |
| hCoV-19/Mexico/JAL-InDRE_421/2021        | EPI_ISL_1168499 | 18/01/2021 | Jalisco     | Human | Female | 59 | Released | Original | Oropharyngeal swab  |
| hCoV-19/Mexico/NLE-InDRE_237/2021        | EPI_ISL_961467  | 18/01/2021 | Nuevo Leon  | Human | Female | 48 | Released | Original | Oropharyngeal swab  |
| hCoV-19/Mexico/NLE-InDRE_238/2021        | EPI_ISL_961468  | 18/01/2021 | Nuevo Leon  | Human | Male   | 50 | Released | Original | Oropharyngeal swab  |
| hCoV-19/Mexico/NLE-InDRE_240/2021        | EPI_ISL_961469  | 18/01/2021 | Nuevo Leon  | Human | Male   | 18 | Released | Original | Oropharyngeal swab  |
| hCoV-19/Mexico/CMX-INMEGEN-01-04-04/2021 | EPI_ISL_1040573 | 19/01/2021 | Mexico City | Human | Male   | 29 | unknown  | Original | Nasopharyngeal swab |
| hCoV-19/Mexico/CMX-INMEGEN-01-04-07/2021 | EPI_ISL_1040574 | 19/01/2021 | Mexico City | Human | Male   | 60 | unknown  | Original | Nasopharyngeal swab |
| hCoV-19/Mexico/CMX-INMEGEN-01-05-06/2021 | EPI_ISL_1040578 | 19/01/2021 | Mexico City | Human | Male   | 47 | unknown  | Original | Nasopharyngeal swab |
| hCoV-19/Mexico/CMX-INMEGEN-01-05-08/2021 | EPI_ISL_1040584 | 19/01/2021 | Mexico City | Human | Female | 58 | unknown  | Original | Nasopharyngeal swab |
| hCoV-19/Mexico/CMX-INMEGEN-01-05-11/2021 | EPI_ISL_1040585 | 19/01/2021 | Mexico City | Human | Male   | 28 | unknown  | Original | Nasopharyngeal swab |
| hCoV-19/Mexico/CMX-INMEGEN-01-05-12/2021 | EPI_ISL_1040586 | 19/01/2021 | Mexico City | Human | Female | 26 | unknown  | Original | Nasopharyngeal swab |
| hCoV-19/Mexico/CMX-INMEGEN-01-05-21/2021 | EPI_ISL_1040599 | 19/01/2021 | Mexico City | Human | Male   | 19 | unknown  | Original | Nasopharyngeal swab |

|                                           |                 |            |                 |       |         |         |              |          |                     |
|-------------------------------------------|-----------------|------------|-----------------|-------|---------|---------|--------------|----------|---------------------|
| hCoV-19/Mexico/COL-InDRE_F11125_S608/2021 | EPI_ISL_1337395 | 19/01/2021 | Colima          | Human | Male    | 77      | Deceased     | Original | Oropharyngeal swab  |
| hCoV-19/Mexico/JAL-LaDEER-E39931/2021     | EPI_ISL_1360411 | 19/01/2021 | Jalisco         | Human | Female  | 34      | Live         | Original | Oropharyngeal swab  |
| hCoV-19/Mexico/SLP_UASLP_A004/2021        | EPI_ISL_1469115 | 19/01/2021 | San Luis Potosi | Human | Male    | 31      | Released     | Original | Oropharyngeal swab  |
| hCoV-19/Mexico/SLP_UASLP_A005/2021        | EPI_ISL_1469116 | 19/01/2021 | San Luis Potosi | Human | Female  | 21      | Released     | Original | Oropharyngeal swab  |
| hCoV-19/Mexico/BCN-ALSR-6671/2021         | EPI_ISL_1081506 | 19/01/2021 | Baja California | Human | unknown | unknown | unknown      | Original | Nasal swab          |
| hCoV-19/Mexico/BCN-ALSR-6709/2021         | EPI_ISL_1081544 | 19/01/2021 | Baja California | Human | unknown | unknown | unknown      | Original | Nasal swab          |
| hCoV-19/Mexico/JAL-InDRE_423/2021         | EPI_ISL_1168501 | 19/01/2021 | Jalisco         | Human | Female  | 44      | Released     | Original | Oropharyngeal swab  |
| hCoV-19/Mexico/JAL-InDRE_424/2021         | EPI_ISL_1168502 | 19/01/2021 | Jalisco         | Human | Male    | 43      | Released     | Original | Oropharyngeal swab  |
| hCoV-19/Mexico/JAL-InDRE_425/2021         | EPI_ISL_1168503 | 19/01/2021 | Jalisco         | Human | Female  | 37      | Hospitalized | Original | Oropharyngeal swab  |
| hCoV-19/Mexico/JAL-InDRE_426/2021         | EPI_ISL_1168504 | 19/01/2021 | Jalisco         | Human | Male    | 16      | Released     | Original | Oropharyngeal swab  |
| hCoV-19/Mexico/JAL-InDRE_427/2021         | EPI_ISL_1168505 | 19/01/2021 | Jalisco         | Human | Female  | 54      | Hospitalized | Original | Oropharyngeal swab  |
| hCoV-19/Mexico/JAL-InDRE_428/2021         | EPI_ISL_1168506 | 19/01/2021 | Jalisco         | Human | Male    | 84      | Hospitalized | Original | Oropharyngeal swab  |
| hCoV-19/Mexico/JAL-InDRE_429/2021         | EPI_ISL_1168507 | 19/01/2021 | Jalisco         | Human | Female  | 23      | Released     | Original | Oropharyngeal swab  |
| hCoV-19/Mexico/CHP-InDRE_444/2021         | EPI_ISL_1168522 | 19/01/2021 | Chiapas         | Human | Male    | 47      | Deceased     | Original | Oropharyngeal swab  |
| hCoV-19/Mexico/COA-InDRE_499/2021         | EPI_ISL_1168569 | 19/01/2021 | Coahuila        | Human | Male    | 84      | Hospitalized | Original | Oropharyngeal swab  |
| hCoV-19/Mexico/HID-InDRE_518/2021         | EPI_ISL_1168588 | 19/01/2021 | Hidalgo         | Human | Female  | 46      | Live         | Original | Oropharyngeal swab  |
| hCoV-19/Mexico/MOR-InDRE_523/2021         | EPI_ISL_1168593 | 19/01/2021 | Morelos         | Human | Female  | 58      | Hospitalized | Original | Oropharyngeal swab  |
| hCoV-19/Mexico/MOR-InDRE_524/2021         | EPI_ISL_1168594 | 19/01/2021 | Morelos         | Human | Male    | 39      | Released     | Original | Oropharyngeal swab  |
| hCoV-19/Mexico/NLE-InDRE_392/2021         | EPI_ISL_1168470 | 19/01/2021 | Nuevo Leon      | Human | Male    | 57      | Released     | Original | Oropharyngeal swab  |
| hCoV-19/Mexico/NLE-InDRE_395/2021         | EPI_ISL_1168473 | 19/01/2021 | Nuevo Leon      | Human | Male    | 22      | Released     | Original | Oropharyngeal swab  |
| hCoV-19/Mexico/NLE-InDRE_396/2021         | EPI_ISL_1168474 | 19/01/2021 | Nuevo Leon      | Human | Female  | 32      | Released     | Original | Oropharyngeal swab  |
| hCoV-19/Mexico/NLE-InDRE_399/2021         | EPI_ISL_1168477 | 19/01/2021 | Nuevo Leon      | Human | Female  | 65      | Released     | Original | Oropharyngeal swab  |
| hCoV-19/Mexico/CMX-INMEGEN-02-02-01/2021  | EPI_ISL_1040554 | 20/01/2021 | Mexico City     | Human | Female  | 63      | unknown      | Original | Nasopharyngeal swab |
| hCoV-19/Mexico/CMX-INMEGEN-02-02-02/2021  | EPI_ISL_1040555 | 20/01/2021 | Mexico City     | Human | Male    | 32      | unknown      | Original | Nasopharyngeal swab |
| hCoV-19/Mexico/CMX-INMEGEN-02-02-17/2021  | EPI_ISL_1040556 | 20/01/2021 | Mexico City     | Human | Male    | 42      | unknown      | Original | Nasopharyngeal swab |
| hCoV-19/Mexico/CMX-INMEGEN-01-04-10/2021  | EPI_ISL_1040575 | 20/01/2021 | Mexico City     | Human | Female  | 23      | unknown      | Original | Nasopharyngeal swab |
| hCoV-19/Mexico/CMX-INMEGEN-01-04-19/2021  | EPI_ISL_1040576 | 20/01/2021 | Mexico City     | Human | Female  | 56      | unknown      | Original | Nasopharyngeal swab |
| hCoV-19/Mexico/CMX-INMEGEN-01-05-13/2021  | EPI_ISL_1040579 | 20/01/2021 | Mexico City     | Human | Female  | 41      | unknown      | Original | Nasopharyngeal swab |
| hCoV-19/Mexico/CMX-INMEGEN-01-05-19/2021  | EPI_ISL_1040581 | 20/01/2021 | Mexico City     | Human | Male    | 27      | unknown      | Original | Nasopharyngeal swab |
| hCoV-19/Mexico/CMX-INMEGEN-01-05-20/2021  | EPI_ISL_1040582 | 20/01/2021 | Mexico City     | Human | Male    | 68      | unknown      | Original | Nasopharyngeal swab |
| hCoV-19/Mexico/CMX-INMEGEN-01-05-23/2021  | EPI_ISL_1040583 | 20/01/2021 | Mexico City     | Human | Male    | 42      | unknown      | Original | Nasopharyngeal swab |
| hCoV-19/Mexico/BCN-ALSR-6577/2021         | EPI_ISL_1081416 | 20/01/2021 | Baja California | Human | unknown | unknown | unknown      | Original | Nasal swab          |
| hCoV-19/Mexico/QUE-InDRE_554/2021         | EPI_ISL_1168624 | 20/01/2021 | Queretaro       | Human | Male    | 36      | Released     | Original | Oropharyngeal swab  |
| hCoV-19/Mexico/SLP_UASLP_A015/2021        | EPI_ISL_1469108 | 20/01/2021 | San Luis Potosi | Human | Female  | 30      | Released     | Original | Oropharyngeal swab  |
| hCoV-19/Mexico/SLP_UASLP_A018/2021        | EPI_ISL_1469109 | 20/01/2021 | San Luis Potosi | Human | Male    | 71      | Released     | Original | Oropharyngeal swab  |
| hCoV-19/Mexico/SLP_UASLP_A007/2021        | EPI_ISL_1469117 | 20/01/2021 | San Luis Potosi | Human | Female  | 40      | Hospitalized | Original | Oropharyngeal swab  |
| hCoV-19/Mexico/SLP_UASLP_A008/2021        | EPI_ISL_1469118 | 20/01/2021 | San Luis Potosi | Human | Female  | 25      | Released     | Original | Oropharyngeal swab  |
| hCoV-19/Mexico/SLP_UASLP_A009/2021        | EPI_ISL_1469119 | 20/01/2021 | San Luis Potosi | Human | Female  | 44      | Released     | Original | Oropharyngeal swab  |
| hCoV-19/Mexico/JAL-InDRE_430/2021         | EPI_ISL_1168508 | 20/01/2021 | Jalisco         | Human | Male    | 24      | Released     | Original | Oropharyngeal swab  |
| hCoV-19/Mexico/JAL-InDRE_431/2021         | EPI_ISL_1168509 | 20/01/2021 | Jalisco         | Human | Male    | 77      | Hospitalized | Original | Oropharyngeal swab  |
| hCoV-19/Mexico/JAL-InDRE_432/2021         | EPI_ISL_1168510 | 20/01/2021 | Jalisco         | Human | Male    | 31      | Released     | Original | Oropharyngeal swab  |

|                                          |                 |            |                 |       |        |    |              |          |                     |
|------------------------------------------|-----------------|------------|-----------------|-------|--------|----|--------------|----------|---------------------|
| hCoV-19/Mexico/JAL-InDRE_433/2021        | EPI_ISL_1168511 | 20/01/2021 | Jalisco         | Human | Female | 35 | Released     | Original | Oropharyngeal swab  |
| hCoV-19/Mexico/JAL-InDRE_434/2021        | EPI_ISL_1168512 | 20/01/2021 | Jalisco         | Human | Female | 37 | Released     | Original | Oropharyngeal swab  |
| hCoV-19/Mexico/BCN-InDRE_447/2021        | EPI_ISL_1168525 | 20/01/2021 | Baja California | Human | Male   | 67 | Deceased     | Original | Oropharyngeal swab  |
| hCoV-19/Mexico/MOR-InDRE_525/2021        | EPI_ISL_1168595 | 20/01/2021 | Morelos         | Human | Male   | 46 | Released     | Original | Oropharyngeal swab  |
| hCoV-19/Mexico/MOR-InDRE_528/2021        | EPI_ISL_1168598 | 20/01/2021 | Morelos         | Human | Female | 49 | Released     | Original | Oropharyngeal swab  |
| hCoV-19/Mexico/OAX-InDRE_537/2021        | EPI_ISL_1168607 | 20/01/2021 | Oaxaca          | Human | Male   | 59 | Deceased     | Original | Oropharyngeal swab  |
| hCoV-19/Mexico/NLE-InDRE_393/2021        | EPI_ISL_1168471 | 20/01/2021 | Nuevo Leon      | Human | Female | 36 | Released     | Original | Oropharyngeal swab  |
| hCoV-19/Mexico/NLE-InDRE_404/2021        | EPI_ISL_1168482 | 20/01/2021 | Nuevo Leon      | Human | Female | 77 | Released     | Original | Oropharyngeal swab  |
| hCoV-19/Mexico/COA-InDRE_413/2021        | EPI_ISL_1168491 | 20/01/2021 | Coahuila        | Human | Male   | 45 | Released     | Original | Oropharyngeal swab  |
| hCoV-19/Mexico/VER-InDRE_417/2021        | EPI_ISL_1168495 | 20/01/2021 | Veracruz        | Human | Male   | 45 | Live         | Original | Oropharyngeal swab  |
| hCoV-19/Mexico/VER-InDRE_418/2021        | EPI_ISL_1168496 | 20/01/2021 | Veracruz        | Human | Male   | 52 | Hospitalized | Original | Oropharyngeal swab  |
| hCoV-19/Mexico/CMX-INMEGEN-01-04-20/2021 | EPI_ISL_1040577 | 21/01/2021 | Mexico City     | Human | Male   | 52 | unknown      | Original | Nasopharyngeal swab |
| hCoV-19/Mexico/GRO-InDRE_F48G_S568/2021  | EPI_ISL_1334381 | 21/01/2021 | Guerrero        | Human | Male   | 53 | Decease      | Original | Oropharyngeal swab  |
| hCoV-19/Mexico/JAL-LaDEER-145340/2021    | EPI_ISL_1360408 | 21/01/2021 | Jalisco         | Human | Male   | 22 | Live         | Original | Oropharyngeal swab  |
| hCoV-19/Mexico/SLP_UASLP_A019/2021       | EPI_ISL_1469110 | 21/01/2021 | San Luis Potosi | Human | Male   | 37 | Released     | Original | Oropharyngeal swab  |
| hCoV-19/Mexico/SLP_UASLP_A020/2021       | EPI_ISL_1469111 | 21/01/2021 | San Luis Potosi | Human | Female | 35 | Released     | Original | Oropharyngeal swab  |
| hCoV-19/Mexico/JAL-InDRE_435/2021        | EPI_ISL_1168513 | 21/01/2021 | Jalisco         | Human | Male   | 69 | Deceased     | Original | Oropharyngeal swab  |
| hCoV-19/Mexico/JAL-InDRE_436/2021        | EPI_ISL_1168514 | 21/01/2021 | Jalisco         | Human | Female | 52 | Released     | Original | Oropharyngeal swab  |
| hCoV-19/Mexico/JAL-InDRE_437/2021        | EPI_ISL_1168515 | 21/01/2021 | Jalisco         | Human | Male   | 77 | Hospitalized | Original | Oropharyngeal swab  |
| hCoV-19/Mexico/TAB-InDRE_446/2021        | EPI_ISL_1168524 | 21/01/2021 | Tabasco         | Human | Male   | 73 | Hospitalized | Original | Oropharyngeal swab  |
| hCoV-19/Mexico/HID-InDRE_519/2021        | EPI_ISL_1168589 | 21/01/2021 | Hidalgo         | Human | Female | 51 | Live         | Original | Oropharyngeal swab  |
| hCoV-19/Mexico/HID-InDRE_520/2021        | EPI_ISL_1168590 | 21/01/2021 | Hidalgo         | Human | Female | 75 | Live         | Original | Oropharyngeal swab  |
| hCoV-19/Mexico/MOR-InDRE_526/2021        | EPI_ISL_1168596 | 21/01/2021 | Morelos         | Human | Male   | 44 | Released     | Original | Oropharyngeal swab  |
| hCoV-19/Mexico/MOR-InDRE_527/2021        | EPI_ISL_1168597 | 21/01/2021 | Morelos         | Human | Male   | 31 | Released     | Original | Oropharyngeal swab  |
| hCoV-19/Mexico/MOR-InDRE_529/2021        | EPI_ISL_1168599 | 21/01/2021 | Morelos         | Human | Female | 40 | Released     | Original | Oropharyngeal swab  |
| hCoV-19/Mexico/MOR-InDRE_530/2021        | EPI_ISL_1168600 | 21/01/2021 | Morelos         | Human | Male   | 87 | Released     | Original | Oropharyngeal swab  |
| hCoV-19/Mexico/MOR-InDRE_533/2021        | EPI_ISL_1168603 | 21/01/2021 | Morelos         | Human | Female | 77 | Released     | Original | Oropharyngeal swab  |
| hCoV-19/Mexico/OAX-InDRE_536/2021        | EPI_ISL_1168606 | 21/01/2021 | Oaxaca          | Human | Male   | 32 | unknown      | Original | Oropharyngeal swab  |
| hCoV-19/Mexico/OAX-InDRE_538/2021        | EPI_ISL_1168608 | 21/01/2021 | Oaxaca          | Human | Male   | 52 | Released     | Original | Oropharyngeal swab  |
| hCoV-19/Mexico/OAX-InDRE_539/2021        | EPI_ISL_1168609 | 21/01/2021 | Oaxaca          | Human | Male   | 83 | Live         | Original | Oropharyngeal swab  |
| hCoV-19/Mexico/NLE-InDRE_389/2021        | EPI_ISL_1168467 | 21/01/2021 | Nuevo Leon      | Human | Male   | 31 | Released     | Original | Oropharyngeal swab  |
| hCoV-19/Mexico/NLE-InDRE_400/2021        | EPI_ISL_1168478 | 21/01/2021 | Nuevo Leon      | Human | Male   | 27 | Released     | Original | Oropharyngeal swab  |
| hCoV-19/Mexico/CMX-INMEGEN-02-02-04/2021 | EPI_ISL_1040551 | 22/01/2021 | Mexico City     | Human | Male   | 38 | unknown      | Original | Nasopharyngeal swab |
| hCoV-19/Mexico/CMX-INMEGEN-02-02-12/2021 | EPI_ISL_1040552 | 22/01/2021 | Mexico City     | Human | Male   | 25 | unknown      | Original | Nasopharyngeal swab |
| hCoV-19/Mexico/CMX-INMEGEN-02-02-19/2021 | EPI_ISL_1040553 | 22/01/2021 | Mexico City     | Human | Female | 51 | unknown      | Original | Nasopharyngeal swab |
| hCoV-19/Mexico/CMX-INMEGEN-02-01-09/2021 | EPI_ISL_1040619 | 22/01/2021 | Mexico City     | Human | Male   | 41 | unknown      | Original | Nasopharyngeal swab |
| hCoV-19/Mexico/CMX-INMEGEN-02-01-18/2021 | EPI_ISL_1040620 | 22/01/2021 | Mexico City     | Human | Female | 59 | unknown      | Original | Nasopharyngeal swab |
| hCoV-19/Mexico/NLE-UANL-023/2021         | EPI_ISL_1091242 | 22/01/2021 | Nuevo Leon      | Human | Female | 69 | unknown      | Original |                     |
| hCoV-19/Mexico/NLE-UANL-022/2021         | EPI_ISL_1091244 | 22/01/2021 | Nuevo Leon      | Human | Male   | 90 | unknown      | Original |                     |
| hCoV-19/Mexico/NLE-UANL-024/2021         | EPI_ISL_1091245 | 22/01/2021 | Nuevo Leon      | Human | Female | 68 | unknown      | Original |                     |
| hCoV-19/Mexico/NLE-UANL-027/2021         | EPI_ISL_1091249 | 22/01/2021 | Nuevo Leon      | Human | Female | 61 | unknown      | Original |                     |



|                                          |                 |            |                 |       |         |         |              |          |                     |
|------------------------------------------|-----------------|------------|-----------------|-------|---------|---------|--------------|----------|---------------------|
| hCoV-19/Mexico/NLE-UANL-025/2021         | EPI_ISL_1091256 | 22/01/2021 | Nuevo Leon      | Human | Female  | 60      | unknown      | Original |                     |
| hCoV-19/Mexico/NLE-UANL-026/2021         | EPI_ISL_1091257 | 22/01/2021 | Nuevo Leon      | Human | Female  | 44      | unknown      | Original |                     |
| hCoV-19/Mexico/OAX-InDRE_541/2021        | EPI_ISL_1168611 | 22/01/2021 | Oaxaca          | Human | Male    | 46      | Released     | Original | Oropharyngeal swab  |
| hCoV-19/Mexico/MEX-InDRE_542/2021        | EPI_ISL_1168612 | 22/01/2021 | State of Mexico | Human | Male    | 44      | Live         | Original | Oropharyngeal swab  |
| hCoV-19/Mexico/QUE-InDRE_555/2021        | EPI_ISL_1168625 | 22/01/2021 | Queretaro       | Human | Female  | 35      | Released     | Original | Oropharyngeal swab  |
| hCoV-19/Mexico/QUE-InDRE_556/2021        | EPI_ISL_1168626 | 22/01/2021 | Queretaro       | Human | Female  | 33      | Released     | Original | Oropharyngeal swab  |
| hCoV-19/Mexico/QUE-InDRE_557/2021        | EPI_ISL_1168627 | 22/01/2021 | Queretaro       | Human | Female  | 26      | Released     | Original | Oropharyngeal swab  |
| hCoV-19/Mexico/QUE-InDRE_558/2021        | EPI_ISL_1168628 | 22/01/2021 | Queretaro       | Human | Male    | 37      | Released     | Original | Oropharyngeal swab  |
| hCoV-19/Mexico/QUE-InDRE_559/2021        | EPI_ISL_1168629 | 22/01/2021 | Queretaro       | Human | Female  | 34      | Released     | Original | Oropharyngeal swab  |
| hCoV-19/Mexico/QUE-InDRE_560/2021        | EPI_ISL_1168630 | 22/01/2021 | Queretaro       | Human | Female  | 20      | Released     | Original | Oropharyngeal swab  |
| hCoV-19/Mexico/QUE-InDRE_561/2021        | EPI_ISL_1168631 | 22/01/2021 | Queretaro       | Human | Male    | 22      | Released     | Original | Oropharyngeal swab  |
| hCoV-19/Mexico/QUE-InDRE_562/2021        | EPI_ISL_1168632 | 22/01/2021 | Queretaro       | Human | Male    | 26      | Released     | Original | Oropharyngeal swab  |
| hCoV-19/Mexico/QUE-InDRE_563/2021        | EPI_ISL_1168633 | 22/01/2021 | Queretaro       | Human | Male    | 39      | Live         | Original | Oropharyngeal swab  |
| hCoV-19/Mexico/SLP_UASLP_A041/2021       | EPI_ISL_1469113 | 22/01/2021 | San Luis Potosi | Human | Female  | 25      | Released     | Original | Oropharyngeal swab  |
| hCoV-19/Mexico/JAL-InDRE_438/2021        | EPI_ISL_1168516 | 22/01/2021 | Jalisco         | Human | Female  | 53      | Released     | Original | Oropharyngeal swab  |
| hCoV-19/Mexico/JAL-InDRE_439/2021        | EPI_ISL_1168517 | 22/01/2021 | Jalisco         | Human | Male    | 44      | Released     | Original | Oropharyngeal swab  |
| hCoV-19/Mexico/CHP-InDRE_445/2021        | EPI_ISL_1168523 | 22/01/2021 | Chiapas         | Human | Male    | 56      | Deceased     | Original | Oropharyngeal swab  |
| hCoV-19/Mexico/TAM-InDRE_449/2021        | EPI_ISL_1168527 | 22/01/2021 | Tamaulipas      | Human | Male    | 86      | Deceased     | Original | Oropharyngeal swab  |
| hCoV-19/Mexico/TAM-InDRE_450/2021        | EPI_ISL_1168528 | 22/01/2021 | Tamaulipas      | Human | Male    | 47      | Deceased     | Original | Oropharyngeal swab  |
| hCoV-19/Mexico/MOR-InDRE_531/2021        | EPI_ISL_1168601 | 22/01/2021 | Morelos         | Human | Female  | 33      | Released     | Original | Oropharyngeal swab  |
| hCoV-19/Mexico/MOR-InDRE_532/2021        | EPI_ISL_1168602 | 22/01/2021 | Morelos         | Human | Male    | 33      | Released     | Original | Oropharyngeal swab  |
| hCoV-19/Mexico/QUE-InDRE_388/2021        | EPI_ISL_1168466 | 22/01/2021 | Queretaro       | Human | Female  | 60      | Hospitalized | Original | Oropharyngeal swab  |
| hCoV-19/Mexico/CMX-InDRE_451/2021        | EPI_ISL_1219711 | 22/01/2021 | Mexico City     | Human | Male    | 52      | Hospitalized | Original | Oropharyngeal swab  |
| hCoV-19/Mexico/CMX-InDRE_452/2021        | EPI_ISL_1219712 | 22/01/2021 | Mexico City     | Human | Male    | 86      | Released     | Original | Oropharyngeal swab  |
| hCoV-19/Mexico/CMX-INMEGEN-02-02-03/2021 | EPI_ISL_1040548 | 23/01/2021 | Mexico City     | Human | Female  | 24      | unknown      | Original | Nasopharyngeal swab |
| hCoV-19/Mexico/CMX-INMEGEN-02-02-13/2021 | EPI_ISL_1040549 | 23/01/2021 | Mexico City     | Human | Male    | 70      | unknown      | Original | Nasopharyngeal swab |
| hCoV-19/Mexico/CMX-INMEGEN-02-02-20/2021 | EPI_ISL_1040550 | 23/01/2021 | Mexico City     | Human | Male    | 11      | unknown      | Original | Nasopharyngeal swab |
| hCoV-19/Mexico/CMX-INMEGEN-02-01-17/2021 | EPI_ISL_1040600 | 23/01/2021 | Mexico City     | Human | Male    | 52      | unknown      | Original | Nasopharyngeal swab |
| hCoV-19/Mexico/CMX-INMEGEN-02-01-20/2021 | EPI_ISL_1040602 | 23/01/2021 | Mexico City     | Human | Female  | 29      | unknown      | Original | Nasopharyngeal swab |
| hCoV-19/Mexico/CMX-INMEGEN-02-01-01/2021 | EPI_ISL_1040618 | 23/01/2021 | Mexico City     | Human | Male    | 51      | unknown      | Original | Nasopharyngeal swab |
| hCoV-19/Mexico/QUE-InDRE_540/2021        | EPI_ISL_1168610 | 23/01/2021 | Queretaro       | Human | Female  | 49      | Released     | Original | Oropharyngeal swab  |
| hCoV-19/Mexico/JAL-InDRE_440/2021        | EPI_ISL_1168518 | 23/01/2021 | Jalisco         | Human | Male    | 32      | Released     | Original | Oropharyngeal swab  |
| hCoV-19/Mexico/JAL-InDRE_441/2021        | EPI_ISL_1168519 | 23/01/2021 | Jalisco         | Human | Female  | 77      | Hospitalized | Original | Oropharyngeal swab  |
| hCoV-19/Mexico/JAL-InDRE_442/2021        | EPI_ISL_1168520 | 23/01/2021 | Jalisco         | Human | Male    | 14      | Released     | Original | Oropharyngeal swab  |
| hCoV-19/Mexico/HID-InDRE_521/2021        | EPI_ISL_1168591 | 23/01/2021 | Hidalgo         | Human | Female  | 32      | Live         | Original | Oropharyngeal swab  |
| hCoV-19/Mexico/BCN-ALSR-7158/2021        | EPI_ISL_1185934 | 23/01/2021 | Baja California | Human | unknown | unknown | unknown      | Original | Nasal swab          |
| hCoV-19/Mexico/BCN-ALSR-7159/2021        | EPI_ISL_1185935 | 23/01/2021 | Baja California | Human | unknown | unknown | unknown      | Original | Nasal swab          |
| hCoV-19/Mexico/BCN-ALSR-7160/2021        | EPI_ISL_1185936 | 23/01/2021 | Baja California | Human | unknown | unknown | unknown      | Original | Nasal swab          |
| hCoV-19/Mexico/SEARCH-7931/2021          | EPI_ISL_1366326 | 23/01/2021 | Baja California | Human | unknown | unknown | unknown      | Original | Nasal swab          |
| hCoV-19/Mexico/CMX-INMEGEN-02-02-05/2021 | EPI_ISL_1040547 | 24/01/2021 | Mexico City     | Human | Male    | 40      | unknown      | Original | Nasopharyngeal swab |
| hCoV-19/Mexico/CMX-INMEGEN-02-01-08/2021 | EPI_ISL_1040617 | 24/01/2021 | Mexico City     | Human | Male    | 71      | unknown      | Original | Nasopharyngeal swab |

|                                          |                 |            |                 |       |         |         |              |          |                     |
|------------------------------------------|-----------------|------------|-----------------|-------|---------|---------|--------------|----------|---------------------|
| hCoV-19/Mexico/CMX-INCMNSZ_COV152225/202 | EPI_ISL_1503143 | 24/01/2021 | Mexico City     | Human | Male    | 80      | Released     | Original | Nasopharyngeal swab |
| hCoV-19/Mexico/SLP_UASLP_A047/2021       | EPI_ISL_1469114 | 24/01/2021 | San Luis Potosi | Human | Female  | 27      | Released     | Original | Oropharyngeal swab  |
| hCoV-19/Mexico/QUE-InDRE_374/2021        | EPI_ISL_1168452 | 24/01/2021 | Queretaro       | Human | Female  | 25      | Released     | Original | Oropharyngeal swab  |
| hCoV-19/Mexico/QUE-InDRE_375/2021        | EPI_ISL_1168453 | 24/01/2021 | Queretaro       | Human | Male    | 36      | Released     | Original | Oropharyngeal swab  |
| hCoV-19/Mexico/QUE-InDRE_376/2021        | EPI_ISL_1168454 | 24/01/2021 | Queretaro       | Human | Male    | 34      | Released     | Original | Oropharyngeal swab  |
| hCoV-19/Mexico/QUE-InDRE_377/2021        | EPI_ISL_1168455 | 24/01/2021 | Queretaro       | Human | Female  | 32      | Released     | Original | Oropharyngeal swab  |
| hCoV-19/Mexico/QUE-InDRE_378/2021        | EPI_ISL_1168456 | 24/01/2021 | Queretaro       | Human | Female  | 37      | Released     | Original | Oropharyngeal swab  |
| hCoV-19/Mexico/QUE-InDRE_379/2021        | EPI_ISL_1168457 | 24/01/2021 | Queretaro       | Human | Male    | 73      | Deceased     | Original | Oropharyngeal swab  |
| hCoV-19/Mexico/CMX-INMEGEN-02-02-14/2021 | EPI_ISL_1040544 | 25/01/2021 | Mexico City     | Human | Male    | 27      | unknown      | Original | Nasopharyngeal swab |
| hCoV-19/Mexico/CMX-INMEGEN-02-02-18/2021 | EPI_ISL_1040545 | 25/01/2021 | Mexico City     | Human | Female  | 34      | unknown      | Original | Nasopharyngeal swab |
| hCoV-19/Mexico/CMX-INMEGEN-02-02-22/2021 | EPI_ISL_1040546 | 25/01/2021 | Mexico City     | Human | Female  | 52      | unknown      | Original | Nasopharyngeal swab |
| hCoV-19/Mexico/CMX-INMEGEN-02-01-05/2021 | EPI_ISL_1040611 | 25/01/2021 | Mexico City     | Human | Male    | 68      | unknown      | Original | Nasopharyngeal swab |
| hCoV-19/Mexico/CMX-INMEGEN-02-01-06/2021 | EPI_ISL_1040612 | 25/01/2021 | Mexico City     | Human | Female  | 64      | unknown      | Original | Nasopharyngeal swab |
| hCoV-19/Mexico/CMX-INMEGEN-02-01-10/2021 | EPI_ISL_1040613 | 25/01/2021 | Mexico City     | Human | Female  | 11      | unknown      | Original | Nasopharyngeal swab |
| hCoV-19/Mexico/CMX-INMEGEN-02-01-11/2021 | EPI_ISL_1040614 | 25/01/2021 | Mexico City     | Human | Female  | 10      | unknown      | Original | Nasopharyngeal swab |
| hCoV-19/Mexico/CMX-INMEGEN-02-01-12/2021 | EPI_ISL_1040615 | 25/01/2021 | Mexico City     | Human | Female  | 22      | unknown      | Original | Nasopharyngeal swab |
| hCoV-19/Mexico/CMX-INMEGEN-02-01-23/2021 | EPI_ISL_1040616 | 25/01/2021 | Mexico City     | Human | Female  | 63      | unknown      | Original | Nasopharyngeal swab |
| hCoV-19/Mexico/JAL-InDRE_F105G_S581/2021 | EPI_ISL_1324764 | 25/01/2021 | Jalisco         | Human | Female  | 18      | Released     | Original | Oropharyngeal swab  |
| hCoV-19/Mexico/JAL-InDRE_F106G_S582/2021 | EPI_ISL_1324765 | 25/01/2021 | Jalisco         | Human | Male    | 22      | Released     | Original | Oropharyngeal swab  |
| hCoV-19/Mexico/MOR-InDRE_448/2021        | EPI_ISL_1168526 | 25/01/2021 | Morelos         | Human | Female  | 38      | Hospitalized | Original | Oropharyngeal swab  |
| hCoV-19/Mexico/MOR-InDRE_534/2021        | EPI_ISL_1168604 | 25/01/2021 | Morelos         | Human | Female  | 45      | Released     | Original | Oropharyngeal swab  |
| hCoV-19/Mexico/BCN-ALSR-7152/2021        | EPI_ISL_1185929 | 25/01/2021 | Baja California | Human | unknown | unknown | unknown      | Original | Nasal swab          |
| hCoV-19/Mexico/BCN-ALSR-7154/2021        | EPI_ISL_1185931 | 25/01/2021 | Baja California | Human | unknown | unknown | unknown      | Original | Nasal swab          |
| hCoV-19/Mexico/SEARCH-7932/2021          | EPI_ISL_1366327 | 25/01/2021 | Baja California | Human | unknown | unknown | unknown      | Original | Nasal swab          |
| hCoV-19/Mexico/SEARCH-7933/2021          | EPI_ISL_1366328 | 25/01/2021 | Baja California | Human | unknown | unknown | unknown      | Original | Nasal swab          |
| hCoV-19/Mexico/SEARCH-7934/2021          | EPI_ISL_1366329 | 25/01/2021 | Baja California | Human | unknown | unknown | unknown      | Original | Nasal swab          |
| hCoV-19/Mexico/SEARCH-7935/2021          | EPI_ISL_1366330 | 25/01/2021 | Baja California | Human | unknown | unknown | unknown      | Original | Nasal swab          |
| hCoV-19/Mexico/QUE-InDRE_380/2021        | EPI_ISL_1168458 | 25/01/2021 | Queretaro       | Human | Female  | 52      | Released     | Original | Oropharyngeal swab  |
| hCoV-19/Mexico/QUE-InDRE_381/2021        | EPI_ISL_1168459 | 25/01/2021 | Queretaro       | Human | Male    | 44      | Released     | Original | Oropharyngeal swab  |
| hCoV-19/Mexico/QUE-InDRE_382/2021        | EPI_ISL_1168460 | 25/01/2021 | Queretaro       | Human | Male    | 56      | Released     | Original | Oropharyngeal swab  |
| hCoV-19/Mexico/QUE-InDRE_383/2021        | EPI_ISL_1168461 | 25/01/2021 | Queretaro       | Human | Female  | 33      | Released     | Original | Oropharyngeal swab  |
| hCoV-19/Mexico/QUE-InDRE_384/2021        | EPI_ISL_1168462 | 25/01/2021 | Queretaro       | Human | Male    | 41      | Released     | Original | Oropharyngeal swab  |
| hCoV-19/Mexico/QUE-InDRE_385/2021        | EPI_ISL_1168463 | 25/01/2021 | Queretaro       | Human | Female  | 59      | Live         | Original | Oropharyngeal swab  |
| hCoV-19/Mexico/QUE-InDRE_386/2021        | EPI_ISL_1168464 | 25/01/2021 | Queretaro       | Human | Female  | 3       | Released     | Original | Oropharyngeal swab  |
| hCoV-19/Mexico/CMX-INMEGEN-02-02-06/2021 | EPI_ISL_1040541 | 26/01/2021 | Mexico City     | Human | Female  | 60      | unknown      | Original | Nasopharyngeal swab |
| hCoV-19/Mexico/CMX-INMEGEN-02-02-09/2021 | EPI_ISL_1040542 | 26/01/2021 | Mexico City     | Human | Female  | 36      | unknown      | Original | Nasopharyngeal swab |
| hCoV-19/Mexico/CMX-INMEGEN-02-02-23/2021 | EPI_ISL_1040543 | 26/01/2021 | Mexico City     | Human | Female  | 8       | unknown      | Original | Nasopharyngeal swab |
| hCoV-19/Mexico/CMX-INMEGEN-02-01-22/2021 | EPI_ISL_1040601 | 26/01/2021 | Mexico City     | Human | Male    | 32      | unknown      | Original | Nasopharyngeal swab |
| hCoV-19/Mexico/CMX-INMEGEN-02-01-07/2021 | EPI_ISL_1040608 | 26/01/2021 | Mexico City     | Human | Male    | 70      | unknown      | Original | Nasopharyngeal swab |
| hCoV-19/Mexico/CMX-INMEGEN-02-01-13/2021 | EPI_ISL_1040609 | 26/01/2021 | Mexico City     | Human | Male    | 31      | unknown      | Original | Nasopharyngeal swab |
| hCoV-19/Mexico/CMX-INMEGEN-02-01-21/2021 | EPI_ISL_1040610 | 26/01/2021 | Mexico City     | Human | Male    | 47      | unknown      | Original | Nasopharyngeal swab |

|                                           |                 |            |                 |       |         |         |          |          |                     |
|-------------------------------------------|-----------------|------------|-----------------|-------|---------|---------|----------|----------|---------------------|
| hCoV-19/Mexico/SEARCH-7937/2021           | EPI_ISL_1366332 | 26/01/2021 | Baja California | Human | unknown | unknown | unknown  | Original | Nasal swab          |
| hCoV-19/Mexico/TAM-InDRE_244/2021         | EPI_ISL_1008713 | 26/01/2021 | Tamaulipas      | Human | Female  | 39      | Released | Original | Pharyngeal swab     |
| hCoV-19/Mexico/QUE-InDRE_387/2021         | EPI_ISL_1168465 | 26/01/2021 | Queretaro       | Human | Female  | 35      | Released | Original | Oropharyngeal swab  |
| hCoV-19/Mexico/CMX-INMEGEN-02-02-07/2021  | EPI_ISL_1040540 | 27/01/2021 | Mexico City     | Human | Female  | 49      | unknown  | Original | Nasopharyngeal swab |
| hCoV-19/Mexico/CMX-INMEGEN-02-01-04/2021  | EPI_ISL_1040604 | 27/01/2021 | Mexico City     | Human | Female  | 56      | unknown  | Original | Nasopharyngeal swab |
| hCoV-19/Mexico/CMX-INMEGEN-02-01-14/2021  | EPI_ISL_1040606 | 27/01/2021 | Mexico City     | Human | Male    | 26      | unknown  | Original | Nasopharyngeal swab |
| hCoV-19/Mexico/CMX-INMEGEN-02-01-15/2021  | EPI_ISL_1040607 | 27/01/2021 | Mexico City     | Human | Female  | 47      | unknown  | Original | Nasopharyngeal swab |
| hCoV-19/Mexico/CMX-INMEGEN-02-03-18/2021  | EPI_ISL_1040643 | 27/01/2021 | Mexico City     | Human | Female  | 78      | unknown  | Original | Nasopharyngeal swab |
| hCoV-19/Mexico/CMX-InDRE_312/2021         | EPI_ISL_1060717 | 27/01/2021 | Mexico City     | Human | Male    | 67      | unknown  | Original | Oropharyngeal swab  |
| hCoV-19/Mexico/SEARCH-7936/2021           | EPI_ISL_1366331 | 27/01/2021 | Baja California | Human | unknown | unknown | unknown  | Original | Nasal swab          |
| hCoV-19/Mexico/CMX-INMEGEN-02-02-21/2021  | EPI_ISL_1040539 | 28/01/2021 | Mexico City     | Human | Female  | 45      | unknown  | Original | Nasopharyngeal swab |
| hCoV-19/Mexico/CMX-INMEGEN-02-01-16/2021  | EPI_ISL_1040605 | 28/01/2021 | Mexico City     | Human | Female  | 29      | unknown  | Original | Nasopharyngeal swab |
| hCoV-19/Mexico/CMX-InDRE_249/2021         | EPI_ISL_1060716 | 28/01/2021 | Mexico City     | Human | Female  | unknown | unknown  | Original | Oropharyngeal swab  |
| hCoV-19/Mexico/JAL-InDRE_245/2021         | EPI_ISL_1008714 | 28/01/2021 | Jalisco         | Human | Female  | 19      | Released | Orginal  | Pharyngeal swab     |
| hCoV-19/Mexico/CMX-INMEGEN-02-02-08/2021  | EPI_ISL_1040535 | 29/01/2021 | Mexico City     | Human | Male    | 47      | unknown  | Original | Nasopharyngeal swab |
| hCoV-19/Mexico/CMX-INMEGEN-02-02-10/2021  | EPI_ISL_1040536 | 29/01/2021 | Mexico City     | Human | Female  | 34      | unknown  | Original | Nasopharyngeal swab |
| hCoV-19/Mexico/CMX-INMEGEN-02-02-15/2021  | EPI_ISL_1040537 | 29/01/2021 | Mexico City     | Human | Female  | 29      | unknown  | Original | Nasopharyngeal swab |
| hCoV-19/Mexico/CMX-INMEGEN-02-02-16/2021  | EPI_ISL_1040538 | 29/01/2021 | Mexico City     | Human | Female  | 37      | unknown  | Original | Nasopharyngeal swab |
| hCoV-19/Mexico/CMX-INMEGEN-02-03-05/2021  | EPI_ISL_1040640 | 29/01/2021 | Mexico City     | Human | Male    | 34      | unknown  | Original | Nasopharyngeal swab |
| hCoV-19/Mexico/CMX-INMEGEN-02-03-17/2021  | EPI_ISL_1040641 | 29/01/2021 | Mexico City     | Human | Male    | 53      | unknown  | Original | Nasopharyngeal swab |
| hCoV-19/Mexico/CMX-INMEGEN-02-03-19/2021  | EPI_ISL_1040642 | 29/01/2021 | Mexico City     | Human | Male    | 59      | unknown  | Original | Nasopharyngeal swab |
| hCoV-19/Mexico/NLE-UANL-028/2021          | EPI_ISL_1091243 | 29/01/2021 | Nuevo Leon      | Human | Male    | 38      | unknown  | Original |                     |
| hCoV-19/Mexico/NLE-UANL-029/2021          | EPI_ISL_1091246 | 29/01/2021 | Nuevo Leon      | Human | Female  | 27      | unknown  | Original |                     |
| hCoV-19/Mexico/CMX-INMEGEN-02-04-07/2021  | EPI_ISL_1055024 | 29/01/2021 | Mexico City     | Human | Female  | 56      | unknown  | Original | Oropharyngeal swab  |
| hCoV-19/Mexico/CMX-INMEGEN-02-04-08/2021  | EPI_ISL_1055025 | 29/01/2021 | Mexico City     | Human | Male    | 54      | unknown  | Original | Oropharyngeal swab  |
| hCoV-19/Mexico/CMX-INMEGEN-02-03-15/2021  | EPI_ISL_1040624 | 30/01/2021 | Mexico City     | Human | Male    | 6       | unknown  | Original | Nasopharyngeal swab |
| hCoV-19/Mexico/CMX-INMEGEN-02-03-06/2021  | EPI_ISL_1040638 | 30/01/2021 | Mexico City     | Human | Male    | 19      | unknown  | Original | Nasopharyngeal swab |
| hCoV-19/Mexico/CMX-INMEGEN-02-03-16/2021  | EPI_ISL_1040639 | 30/01/2021 | Mexico City     | Human | Male    | 12      | unknown  | Original | Nasopharyngeal swab |
| hCoV-19/Mexico/CMX-InDRE_247/2021         | EPI_ISL_1060715 | 30/01/2021 | Mexico City     | Human | Male    | unknown | unknown  | Original | Oropharyngeal swab  |
| hCoV-19/Mexico/CMX-INMEGEN-02-03-01/2021  | EPI_ISL_1040637 | 31/01/2021 | Mexico City     | Human | Male    | 53      | unknown  | Original | Nasopharyngeal swab |
| hCoV-19/Mexico/CMX-INMEGEN-02-04-05/2021  | EPI_ISL_1055023 | 31/01/2021 | Mexico City     | Human | Male    | 30      | unknown  | Original | Oropharyngeal swab  |
| hCoV-19/Mexico/CMX-INMEGEN-02-06-11/2021  | EPI_ISL_1080447 | 01/02/2021 | Mexico City     | Human | Female  | 40      | unknown  | Original | Oropharyngeal swab  |
| hCoV-19/Mexico/CMX-INMEGEN-02-05-22/2021  | EPI_ISL_1060611 | 01/02/2021 | Mexico City     | Human | Female  | 65      | unknown  | Original | Oropharyngeal swab  |
| hCoV-19/Mexico/CMX-INMEGEN-02-03-09/2021  | EPI_ISL_1040623 | 02/02/2021 | Mexico City     | Human | Male    | 25      | unknown  | Original | Nasopharyngeal swab |
| hCoV-19/Mexico/CMX-INMEGEN-02-03-14/2021  | EPI_ISL_1040634 | 02/02/2021 | Mexico City     | Human | Male    | 67      | unknown  | Original | Nasopharyngeal swab |
| hCoV-19/Mexico/CMX-INMEGEN-02-03-20/2021  | EPI_ISL_1040635 | 02/02/2021 | Mexico City     | Human | Female  | 71      | unknown  | Original | Nasopharyngeal swab |
| hCoV-19/Mexico/CMX-INMEGEN-02-03-21/2021  | EPI_ISL_1040636 | 02/02/2021 | Mexico City     | Human | Male    | 39      | unknown  | Original | Nasopharyngeal swab |
| hCoV-19/Mexico/CMX-InDRE_248/2021         | EPI_ISL_1060714 | 02/02/2021 | Mexico City     | Human | Female  | unknown | unknown  | Original | Oropharyngeal swab  |
| hCoV-19/Mexico/BCN-SEARCH-7577/2021       | EPI_ISL_1295837 | 02/02/2021 | Baja California | Human | unknown | unknown | unknown  | Original | Nasal swab          |
| hCoV-19/Mexico/BCN-SEARCH-7585/2021       | EPI_ISL_1295843 | 02/02/2021 | Baja California | Human | unknown | unknown | unknown  | Original | Nasal swab          |
| hCoV-19/Mexico/AGU-InDRE_F11772B_S1094/20 | EPI_ISL_1516786 | 02/02/2021 | Aguascalientes  | Human | Female  | 13      | unknown  | Original | Oropharyngeal swab  |

|                                          |                 |            |                 |       |         |         |                   |          |                     |
|------------------------------------------|-----------------|------------|-----------------|-------|---------|---------|-------------------|----------|---------------------|
| hCoV-19/Mexico/CMX-INMEGEN-02-04-06/2021 | EPI_ISL_1055021 | 02/02/2021 | Mexico City     | Human | Female  | 37      | unknown           | Original | Oropharyngeal swab  |
| hCoV-19/Mexico/CMX-INMEGEN-02-04-09/2021 | EPI_ISL_1055022 | 02/02/2021 | Mexico City     | Human | Male    | 49      | unknown           | Original | Oropharyngeal swab  |
| hCoV-19/Mexico/CMX-INMEGEN-02-03-08/2021 | EPI_ISL_1040631 | 03/02/2021 | Mexico City     | Human | Male    | 30      | unknown           | Original | Nasopharyngeal swab |
| hCoV-19/Mexico/CMX-INMEGEN-02-03-22/2021 | EPI_ISL_1040632 | 03/02/2021 | Mexico City     | Human | Female  | 38      | unknown           | Original | Nasopharyngeal swab |
| hCoV-19/Mexico/CMX-INMEGEN-02-03-23/2021 | EPI_ISL_1040633 | 03/02/2021 | Mexico City     | Human | Male    | 49      | unknown           | Original | Nasopharyngeal swab |
| hCoV-19/Mexico/CMX-INMEGEN-02-05-09/2021 | EPI_ISL_1075267 | 03/02/2021 | Mexico City     | Human | Male    | 46      | unknown           | Original |                     |
| hCoV-19/Mexico/CMX-INMEGEN-02-06-04/2021 | EPI_ISL_1080436 | 03/02/2021 | Mexico City     | Human | Male    | 24      | unknown           | Original | Oropharyngeal swab  |
| hCoV-19/Mexico/CMX-INMEGEN-02-06-02/2021 | EPI_ISL_1080438 | 03/02/2021 | Mexico City     | Human | Female  | 59      | unknown           | Original | Oropharyngeal swab  |
| hCoV-19/Mexico/CMX-INMEGEN-02-06-03/2021 | EPI_ISL_1080440 | 03/02/2021 | Mexico City     | Human | Female  | 41      | unknown           | Original | Oropharyngeal swab  |
| hCoV-19/Mexico/CMX-INMEGEN-02-06-05/2021 | EPI_ISL_1080441 | 03/02/2021 | Mexico City     | Human | Male    | 43      | unknown           | Original | Oropharyngeal swab  |
| hCoV-19/Mexico/CMX-INMEGEN-02-06-06/2021 | EPI_ISL_1080442 | 03/02/2021 | Mexico City     | Human | Male    | 45      | unknown           | Original | Oropharyngeal swab  |
| hCoV-19/Mexico/CMX-INMEGEN-02-06-07/2021 | EPI_ISL_1080443 | 03/02/2021 | Mexico City     | Human | Male    | 27      | unknown           | Original | Oropharyngeal swab  |
| hCoV-19/Mexico/CMX-INMEGEN-02-06-08/2021 | EPI_ISL_1080444 | 03/02/2021 | Mexico City     | Human | Female  | 54      | unknown           | Original | Oropharyngeal swab  |
| hCoV-19/Mexico/CMX-INMEGEN-02-06-09/2021 | EPI_ISL_1080445 | 03/02/2021 | Mexico City     | Human | Male    | 48      | unknown           | Original | Oropharyngeal swab  |
| hCoV-19/Mexico/CMX-INMEGEN-02-05-13/2021 | EPI_ISL_1060600 | 03/02/2021 | Mexico City     | Human | Female  | 85      | unknown           | Original | Oropharyngeal swab  |
| hCoV-19/Mexico/CMX-INMEGEN-02-05-10/2021 | EPI_ISL_1060601 | 03/02/2021 | Mexico City     | Human | Female  | 5       | unknown           | Original | Oropharyngeal swab  |
| hCoV-19/Mexico/CMX-INMEGEN-02-05-11/2021 | EPI_ISL_1060602 | 03/02/2021 | Mexico City     | Human | Male    | 24      | unknown           | Original | Oropharyngeal swab  |
| hCoV-19/Mexico/CMX-INMEGEN-02-05-12/2021 | EPI_ISL_1060603 | 03/02/2021 | Mexico City     | Human | Female  | 42      | unknown           | Original | Oropharyngeal swab  |
| hCoV-19/Mexico/CMX-INMEGEN-02-05-14/2021 | EPI_ISL_1060604 | 03/02/2021 | Mexico City     | Human | Male    | 63      | unknown           | Original | Oropharyngeal swab  |
| hCoV-19/Mexico/CMX-INMEGEN-02-05-15/2021 | EPI_ISL_1060605 | 03/02/2021 | Mexico City     | Human | Female  | 69      | unknown           | Original | Oropharyngeal swab  |
| hCoV-19/Mexico/CMX-INMEGEN-02-05-16/2021 | EPI_ISL_1060606 | 03/02/2021 | Mexico City     | Human | Female  | 45      | unknown           | Original | Oropharyngeal swab  |
| hCoV-19/Mexico/CMX-INMEGEN-02-05-17/2021 | EPI_ISL_1060607 | 03/02/2021 | Mexico City     | Human | Male    | 27      | unknown           | Original | Oropharyngeal swab  |
| hCoV-19/Mexico/CMX-INMEGEN-02-05-18/2021 | EPI_ISL_1060608 | 03/02/2021 | Mexico City     | Human | Male    | 41      | unknown           | Original | Oropharyngeal swab  |
| hCoV-19/Mexico/CMX-INMEGEN-02-05-21/2021 | EPI_ISL_1060609 | 03/02/2021 | Mexico City     | Human | Female  | 32      | unknown           | Original | Oropharyngeal swab  |
| hCoV-19/Mexico/CMX-INMEGEN-02-05-23/2021 | EPI_ISL_1060610 | 03/02/2021 | Mexico City     | Human | Female  | 50      | unknown           | Original | Oropharyngeal swab  |
| hCoV-19/Mexico/SIN_CIAD_HJ0923/2021      | EPI_ISL_1120614 | 03/02/2021 | Sinaloa         | Human | Female  | 41      | live, symptomatic | Original | Nasopharyngeal swab |
| hCoV-19/Mexico/SEARCH-7938/2021          | EPI_ISL_1366333 | 03/02/2021 | Baja California | Human | unknown | unknown | unknown           | Original | Nasal swab          |
| hCoV-19/Mexico/CMX-INMEGEN-02-04-01/2021 | EPI_ISL_1055017 | 03/02/2021 | Mexico City     | Human | Male    | 29      | unknown           | Original | Oropharyngeal swab  |
| hCoV-19/Mexico/CMX-INMEGEN-02-04-10/2021 | EPI_ISL_1055018 | 03/02/2021 | Mexico City     | Human | Female  | 29      | unknown           | Original | Oropharyngeal swab  |
| hCoV-19/Mexico/CMX-INMEGEN-02-04-11/2021 | EPI_ISL_1055019 | 03/02/2021 | Mexico City     | Human | Female  | 44      | unknown           | Original | Oropharyngeal swab  |
| hCoV-19/Mexico/CMX-INMEGEN-02-04-20/2021 | EPI_ISL_1055020 | 03/02/2021 | Mexico City     | Human | Female  | 29      | unknown           | Original | Oropharyngeal swab  |
| hCoV-19/Mexico/CMX-INMEGEN-02-03-02/2021 | EPI_ISL_1040627 | 04/02/2021 | Mexico City     | Human | Male    | 41      | unknown           | Original | Nasopharyngeal swab |
| hCoV-19/Mexico/CMX-INMEGEN-02-03-03/2021 | EPI_ISL_1040628 | 04/02/2021 | Mexico City     | Human | Female  | 19      | unknown           | Original | Nasopharyngeal swab |
| hCoV-19/Mexico/CMX-INMEGEN-02-03-04/2021 | EPI_ISL_1040629 | 04/02/2021 | Mexico City     | Human | Female  | 45      | unknown           | Original | Nasopharyngeal swab |
| hCoV-19/Mexico/CMX-INMEGEN-02-03-10/2021 | EPI_ISL_1040630 | 04/02/2021 | Mexico City     | Human | Female  | 77      | unknown           | Original | Nasopharyngeal swab |
| hCoV-19/Mexico/CMX-INMEGEN-02-06-12/2021 | EPI_ISL_1080433 | 04/02/2021 | Mexico City     | Human | Male    | 14      | unknown           | Original | Oropharyngeal swab  |
| hCoV-19/Mexico/CMX-INMEGEN-02-06-13/2021 | EPI_ISL_1080434 | 04/02/2021 | Mexico City     | Human | Male    | 17      | unknown           | Original | Oropharyngeal swab  |
| hCoV-19/Mexico/CMX-INMEGEN-02-06-17/2021 | EPI_ISL_1080435 | 04/02/2021 | Mexico City     | Human | Female  | 25      | unknown           | Original | Oropharyngeal swab  |
| hCoV-19/Mexico/CMX-INMEGEN-02-06-10/2021 | EPI_ISL_1080446 | 04/02/2021 | Mexico City     | Human | Male    | 28      | unknown           | Original | Oropharyngeal swab  |
| hCoV-19/Mexico/CMX-INMEGEN-02-06-14/2021 | EPI_ISL_1080448 | 04/02/2021 | Mexico City     | Human | Female  | 34      | unknown           | Original | Oropharyngeal swab  |
| hCoV-19/Mexico/CMX-INMEGEN-02-06-15/2021 | EPI_ISL_1080449 | 04/02/2021 | Mexico City     | Human | Male    | 25      | unknown           | Original | Oropharyngeal swab  |

|                                          |                 |            |             |       |        |    |          |          |                     |
|------------------------------------------|-----------------|------------|-------------|-------|--------|----|----------|----------|---------------------|
| hCoV-19/Mexico/CMX-INMEGEN-02-06-16/2021 | EPI_ISL_1080450 | 04/02/2021 | Mexico City | Human | Female | 53 | unknown  | Original | Oropharyngeal swab  |
| hCoV-19/Mexico/CMX-INMEGEN-02-04-02/2021 | EPI_ISL_1055009 | 04/02/2021 | Mexico City | Human | Male   | 30 | unknown  | Original | Oropharyngeal swab  |
| hCoV-19/Mexico/CMX-INMEGEN-02-04-03/2021 | EPI_ISL_1055010 | 04/02/2021 | Mexico City | Human | Female | 33 | unknown  | Original | Oropharyngeal swab  |
| hCoV-19/Mexico/CMX-INMEGEN-02-04-04/2021 | EPI_ISL_1055011 | 04/02/2021 | Mexico City | Human | Male   | 27 | unknown  | Original | Oropharyngeal swab  |
| hCoV-19/Mexico/CMX-INMEGEN-02-04-12/2021 | EPI_ISL_1055012 | 04/02/2021 | Mexico City | Human | Male   | 27 | unknown  | Original | Oropharyngeal swab  |
| hCoV-19/Mexico/CMX-INMEGEN-02-04-13/2021 | EPI_ISL_1055013 | 04/02/2021 | Mexico City | Human | Female | 43 | unknown  | Original | Oropharyngeal swab  |
| hCoV-19/Mexico/CMX-INMEGEN-02-04-14/2021 | EPI_ISL_1055014 | 04/02/2021 | Mexico City | Human | Male   | 51 | unknown  | Original | Oropharyngeal swab  |
| hCoV-19/Mexico/CMX-INMEGEN-02-04-21/2021 | EPI_ISL_1055015 | 04/02/2021 | Mexico City | Human | Male   | 52 | unknown  | Original | Oropharyngeal swab  |
| hCoV-19/Mexico/CMX-INMEGEN-02-04-22/2021 | EPI_ISL_1055016 | 04/02/2021 | Mexico City | Human | Female | 27 | unknown  | Original | Oropharyngeal swab  |
| hCoV-19/Mexico/TAM-InDRE_453/2021        | EPI_ISL_1219713 | 04/02/2021 | Tamaulipas  | Human | Male   | 47 | Released | Original | Oropharyngeal swab  |
| hCoV-19/Mexico/CMX-INMEGEN-02-03-11/2021 | EPI_ISL_1040625 | 05/02/2021 | Mexico City | Human | Male   | 31 | unknown  | Original | Nasopharyngeal swab |
| hCoV-19/Mexico/CMX-INMEGEN-02-03-12/2021 | EPI_ISL_1040626 | 05/02/2021 | Mexico City | Human | Male   | 5  | unknown  | Original | Nasopharyngeal swab |
| hCoV-19/Mexico/CMX-INMEGEN-02-07-11/2021 | EPI_ISL_1081166 | 05/02/2021 | Mexico City | Human | Female | 28 | unknown  | Original | Oropharyngeal swab  |
| hCoV-19/Mexico/CMX-INMEGEN-02-07-12/2021 | EPI_ISL_1081167 | 05/02/2021 | Mexico City | Human | Female | 30 | unknown  | Original | Oropharyngeal swab  |
| hCoV-19/Mexico/CMX-INMEGEN-02-07-22/2021 | EPI_ISL_1081168 | 05/02/2021 | Mexico City | Human | Female | 31 | unknown  | Original | Oropharyngeal swab  |
| hCoV-19/Mexico/CMX-INMEGEN-02-07-23/2021 | EPI_ISL_1081169 | 05/02/2021 | Mexico City | Human | Male   | 27 | unknown  | Original | Oropharyngeal swab  |
| hCoV-19/Mexico/CMX-INMEGEN-02-05-19/2021 | EPI_ISL_1060598 | 05/02/2021 | Mexico City | Human | Female | 57 | unknown  | Original | Oropharyngeal swab  |
| hCoV-19/Mexico/CMX-INMEGEN-02-05-20/2021 | EPI_ISL_1060599 | 05/02/2021 | Mexico City | Human | Male   | 46 | unknown  | Original | Oropharyngeal swab  |
| hCoV-19/Mexico/CMX-INMEGEN-02-06-01/2021 | EPI_ISL_1080439 | 05/02/2021 | Mexico City | Human | Female | 64 | unknown  | Original | Oropharyngeal swab  |
| hCoV-19/Mexico/CMX-INMEGEN-02-06-18/2021 | EPI_ISL_1080451 | 05/02/2021 | Mexico City | Human | Male   | 7  | unknown  | Original | Oropharyngeal swab  |
| hCoV-19/Mexico/CMX-INMEGEN-02-06-19/2021 | EPI_ISL_1080452 | 05/02/2021 | Mexico City | Human | Female | 31 | unknown  | Original | Oropharyngeal swab  |
| hCoV-19/Mexico/CMX-INMEGEN-02-09-06/2021 | EPI_ISL_1095511 | 05/02/2021 | Mexico City | Human | Male   | 24 | unknown  | Original | Oropharyngeal swab  |
| hCoV-19/Mexico/CMX-INMEGEN-02-09-07/2021 | EPI_ISL_1095512 | 05/02/2021 | Mexico City | Human | Female | 46 | unknown  | Original | Oropharyngeal swab  |
| hCoV-19/Mexico/CMX-INMEGEN-02-09-21/2021 | EPI_ISL_1095513 | 05/02/2021 | Mexico City | Human | Female | 31 | unknown  | Original | Oropharyngeal swab  |
| hCoV-19/Mexico/CMX-INMEGEN-02-09-22/2021 | EPI_ISL_1095514 | 05/02/2021 | Mexico City | Human | Male   | 28 | unknown  | Original | Oropharyngeal swab  |
| hCoV-19/Mexico/CMX-INMEGEN-02-09-23/2021 | EPI_ISL_1095515 | 05/02/2021 | Mexico City | Human | Female | 45 | unknown  | Original | Oropharyngeal swab  |
| hCoV-19/Mexico/CMX-INMEGEN-02-11-06/2021 | EPI_ISL_1117358 | 05/02/2021 | Mexico City | Human | Female | 14 | unknown  | Original | Oropharyngeal swab  |
| hCoV-19/Mexico/CMX-INMEGEN-02-11-14/2021 | EPI_ISL_1117366 | 05/02/2021 | Mexico City | Human | Male   | 31 | unknown  | Original | Oropharyngeal swab  |
| hCoV-19/Mexico/CMX-INMEGEN-02-11-15/2021 | EPI_ISL_1117367 | 05/02/2021 | Mexico City | Human | Female | 66 | unknown  | Original | Oropharyngeal swab  |
| hCoV-19/Mexico/JAL-InDRE_F101G_S577/2021 | EPI_ISL_1324760 | 05/02/2021 | Jalisco     | Human | Female | 16 | Released | Original | Oropharyngeal swab  |
| hCoV-19/Mexico/JAL-InDRE_F102G_S578/2021 | EPI_ISL_1324761 | 05/02/2021 | Jalisco     | Human | Male   | 35 | Released | Original | Oropharyngeal swab  |
| hCoV-19/Mexico/CMX-INMEGEN-02-04-18/2021 | EPI_ISL_1058046 | 05/02/2021 | Mexico City | Human | Female | 51 | unknown  | Original |                     |
| hCoV-19/Mexico/CMX-INMEGEN-02-10-04/2021 | EPI_ISL_1137460 | 05/02/2021 | Mexico City | Human | Female | 22 | unknown  | Original | Oropharyngeal swab  |
| hCoV-19/Mexico/CMX-INMEGEN-02-10-09/2021 | EPI_ISL_1137468 | 05/02/2021 | Mexico City | Human | Female | 24 | unknown  | Original | Oropharyngeal swab  |
| hCoV-19/Mexico/CMX-INMEGEN-02-10-10/2021 | EPI_ISL_1137469 | 05/02/2021 | Mexico City | Human | Female | 27 | unknown  | Original | Oropharyngeal swab  |
| hCoV-19/Mexico/CMX-INMEGEN-02-10-11/2021 | EPI_ISL_1137470 | 05/02/2021 | Mexico City | Human | Male   | 65 | unknown  | Original | Oropharyngeal swab  |
| hCoV-19/Mexico/CMX-INMEGEN-02-04-17/2021 | EPI_ISL_1055005 | 05/02/2021 | Mexico City | Human | Female | 85 | unknown  | Original | Oropharyngeal swab  |
| hCoV-19/Mexico/CMX-INMEGEN-02-04-15/2021 | EPI_ISL_1055006 | 05/02/2021 | Mexico City | Human | Female | 54 | unknown  | Original | Oropharyngeal swab  |
| hCoV-19/Mexico/CMX-INMEGEN-02-04-16/2021 | EPI_ISL_1055007 | 05/02/2021 | Mexico City | Human | Male   | 61 | unknown  | Original | Oropharyngeal swab  |
| hCoV-19/Mexico/CMX-INMEGEN-02-04-19/2021 | EPI_ISL_1055008 | 05/02/2021 | Mexico City | Human | Female | 24 | unknown  | Original | Oropharyngeal swab  |
| hCoV-19/Mexico/CMX-INMEGEN-02-09-05/2021 | EPI_ISL_1095496 | 06/02/2021 | Mexico City | Human | Male   | 26 | unknown  | Original | Oropharyngeal swab  |



|                                          |                 |            |                 |       |         |         |          |          |                    |
|------------------------------------------|-----------------|------------|-----------------|-------|---------|---------|----------|----------|--------------------|
| hCoV-19/Mexico/CMX-INMEGEN-02-09-03/2021 | EPI_ISL_1095509 | 06/02/2021 | Mexico City     | Human | Male    | 44      | unknown  | Original | Oropharyngeal swab |
| hCoV-19/Mexico/CMX-INMEGEN-02-09-04/2021 | EPI_ISL_1095510 | 06/02/2021 | Mexico City     | Human | Female  | 45      | unknown  | Original | Oropharyngeal swab |
| hCoV-19/Mexico/CMX-INMEGEN-02-11-16/2021 | EPI_ISL_1117368 | 06/02/2021 | Mexico City     | Human | Male    | 53      | unknown  | Original | Oropharyngeal swab |
| hCoV-19/Mexico/CMX-INMEGEN-02-11-17/2021 | EPI_ISL_1117369 | 06/02/2021 | Mexico City     | Human | Female  | 54      | unknown  | Original | Oropharyngeal swab |
| hCoV-19/Mexico/CMX-INMEGEN-02-11-18/2021 | EPI_ISL_1117370 | 06/02/2021 | Mexico City     | Human | Male    | 52      | unknown  | Original | Oropharyngeal swab |
| hCoV-19/Mexico/CMX-INMEGEN-02-10-01/2021 | EPI_ISL_1137462 | 06/02/2021 | Mexico City     | Human | Male    | 38      | unknown  | Original | Oropharyngeal swab |
| hCoV-19/Mexico/CMX-INMEGEN-02-10-02/2021 | EPI_ISL_1137463 | 06/02/2021 | Mexico City     | Human | Male    | 35      | unknown  | Original | Oropharyngeal swab |
| hCoV-19/Mexico/CMX-INMEGEN-02-10-06/2021 | EPI_ISL_1137465 | 06/02/2021 | Mexico City     | Human | Male    | 51      | unknown  | Original | Oropharyngeal swab |
| hCoV-19/Mexico/CMX-INMEGEN-02-07-05/2021 | EPI_ISL_1095493 | 07/02/2021 | Mexico City     | Human | Female  | 29      | unknown  | Original | Oropharyngeal swab |
| hCoV-19/Mexico/CMX-INMEGEN-02-07-06/2021 | EPI_ISL_1095494 | 07/02/2021 | Mexico City     | Human | Male    | 76      | unknown  | Original | Oropharyngeal swab |
| hCoV-19/Mexico/CMX-INMEGEN-02-09-02/2021 | EPI_ISL_1095508 | 07/02/2021 | Mexico City     | Human | Male    | 54      | unknown  | Original | Oropharyngeal swab |
| hCoV-19/Mexico/CMX-INMEGEN-02-10-03/2021 | EPI_ISL_1137464 | 07/02/2021 | Mexico City     | Human | Female  | 27      | unknown  | Original | Oropharyngeal swab |
| hCoV-19/Mexico/CMX-INMEGEN-02-10-07/2021 | EPI_ISL_1137466 | 07/02/2021 | Mexico City     | Human | Male    | 18      | unknown  | Original | Oropharyngeal swab |
| hCoV-19/Mexico/CMX-INMEGEN-02-10-08/2021 | EPI_ISL_1137467 | 07/02/2021 | Mexico City     | Human | Male    | 15      | unknown  | Original | Oropharyngeal swab |
| hCoV-19/Mexico/TAM-InDRE_456/2021        | EPI_ISL_1219716 | 07/02/2021 | Tamaulipas      | Human | Female  | 56      | Released | Original | Oropharyngeal swab |
| hCoV-19/Mexico/TAM-InDRE_457/2021        | EPI_ISL_1219717 | 07/02/2021 | Tamaulipas      | Human | Male    | 58      | Released | Original | Oropharyngeal swab |
| hCoV-19/Mexico/TAM-InDRE_458/2021        | EPI_ISL_1219718 | 07/02/2021 | Tamaulipas      | Human | Male    | 50      | Released | Original | Oropharyngeal swab |
| hCoV-19/Mexico/CMX-INMEGEN-02-07-09/2021 | EPI_ISL_1081165 | 08/02/2021 | Mexico City     | Human | Female  | 47      | unknown  | Original | Oropharyngeal swab |
| hCoV-19/Mexico/CMX-INMEGEN-02-06-20/2021 | EPI_ISL_1085421 | 08/02/2021 | Mexico City     | Human | Female  | 35      | unknown  | Original |                    |
| hCoV-19/Mexico/CMX-INMEGEN-02-06-21/2021 | EPI_ISL_1080437 | 08/02/2021 | Mexico City     | Human | Female  | 22      | unknown  | Original | Oropharyngeal swab |
| hCoV-19/Mexico/CMX-INMEGEN-02-06-23/2021 | EPI_ISL_1080453 | 08/02/2021 | Mexico City     | Human | Male    | 51      | unknown  | Original | Oropharyngeal swab |
| hCoV-19/Mexico/CMX-INMEGEN-02-09-08/2021 | EPI_ISL_1095497 | 08/02/2021 | Mexico City     | Human | Female  | 30      | unknown  | Original | Oropharyngeal swab |
| hCoV-19/Mexico/CMX-INMEGEN-02-09-09/2021 | EPI_ISL_1095498 | 08/02/2021 | Mexico City     | Human | Female  | 68      | unknown  | Original | Oropharyngeal swab |
| hCoV-19/Mexico/CMX-INMEGEN-02-09-11/2021 | EPI_ISL_1095499 | 08/02/2021 | Mexico City     | Human | Female  | 23      | unknown  | Original | Oropharyngeal swab |
| hCoV-19/Mexico/CMX-INMEGEN-02-09-12/2021 | EPI_ISL_1095500 | 08/02/2021 | Mexico City     | Human | Male    | 56      | unknown  | Original | Oropharyngeal swab |
| hCoV-19/Mexico/CMX-INMEGEN-02-09-13/2021 | EPI_ISL_1095501 | 08/02/2021 | Mexico City     | Human | Female  | 24      | unknown  | Original | Oropharyngeal swab |
| hCoV-19/Mexico/CMX-INMEGEN-02-09-14/2021 | EPI_ISL_1095502 | 08/02/2021 | Mexico City     | Human | Female  | 24      | unknown  | Original | Oropharyngeal swab |
| hCoV-19/Mexico/CMX-INMEGEN-02-09-15/2021 | EPI_ISL_1095503 | 08/02/2021 | Mexico City     | Human | Male    | 25      | unknown  | Original | Oropharyngeal swab |
| hCoV-19/Mexico/CMX-INMEGEN-02-09-16/2021 | EPI_ISL_1095504 | 08/02/2021 | Mexico City     | Human | Female  | 24      | unknown  | Original | Oropharyngeal swab |
| hCoV-19/Mexico/CMX-INMEGEN-02-09-17/2021 | EPI_ISL_1095505 | 08/02/2021 | Mexico City     | Human | Female  | 24      | unknown  | Original | Oropharyngeal swab |
| hCoV-19/Mexico/CMX-INMEGEN-02-09-19/2021 | EPI_ISL_1095506 | 08/02/2021 | Mexico City     | Human | Female  | 24      | unknown  | Original | Oropharyngeal swab |
| hCoV-19/Mexico/CMX-INMEGEN-02-09-20/2021 | EPI_ISL_1095507 | 08/02/2021 | Mexico City     | Human | Female  | 24      | unknown  | Original | Oropharyngeal swab |
| hCoV-19/Mexico/CMX-INMEGEN-02-11-01/2021 | EPI_ISL_1117353 | 08/02/2021 | Mexico City     | Human | Male    | 19      | unknown  | Original | Oropharyngeal swab |
| hCoV-19/Mexico/CMX-INMEGEN-02-11-02/2021 | EPI_ISL_1117354 | 08/02/2021 | Mexico City     | Human | Female  | 34      | unknown  | Original | Oropharyngeal swab |
| hCoV-19/Mexico/CMX-INMEGEN-02-11-03/2021 | EPI_ISL_1117355 | 08/02/2021 | Mexico City     | Human | Female  | 15      | unknown  | Original | Oropharyngeal swab |
| hCoV-19/Mexico/CMX-INMEGEN-02-11-09/2021 | EPI_ISL_1117361 | 08/02/2021 | Mexico City     | Human | Male    | 48      | unknown  | Original | Oropharyngeal swab |
| hCoV-19/Mexico/CMX-INMEGEN-02-11-10/2021 | EPI_ISL_1117362 | 08/02/2021 | Mexico City     | Human | Male    | 59      | unknown  | Original | Oropharyngeal swab |
| hCoV-19/Mexico/CMX-INMEGEN-02-11-11/2021 | EPI_ISL_1117363 | 08/02/2021 | Mexico City     | Human | Male    | 65      | unknown  | Original | Oropharyngeal swab |
| hCoV-19/Mexico/BCN-SEARCH-7370/2021      | EPI_ISL_1295676 | 08/02/2021 | Baja California | Human | unknown | unknown | unknown  | Original | Nasal swab         |
| hCoV-19/Mexico/CMX-INMEGEN-02-10-14/2021 | EPI_ISL_1137461 | 08/02/2021 | Mexico City     | Human | Male    | 32      | unknown  | Original | Oropharyngeal swab |
| hCoV-19/Mexico/CMX-INMEGEN-02-10-12/2021 | EPI_ISL_1137471 | 08/02/2021 | Mexico City     | Human | Male    | 44      | unknown  | Original | Oropharyngeal swab |

|                                            |                 |            |                 |       |         |         |          |          |                     |
|--------------------------------------------|-----------------|------------|-----------------|-------|---------|---------|----------|----------|---------------------|
| hCoV-19/Mexico/CMX-INMEGEN-02-10-13/2021   | EPI_ISL_1137472 | 08/02/2021 | Mexico City     | Human | Male    | 48      | unknown  | Original | Oropharyngeal swab  |
| hCoV-19/Mexico/CMX-INMEGEN-02-10-15/2021   | EPI_ISL_1137473 | 08/02/2021 | Mexico City     | Human | Female  | 62      | unknown  | Original | Oropharyngeal swab  |
| hCoV-19/Mexico/CMX-INMEGEN-02-10-16/2021   | EPI_ISL_1137474 | 08/02/2021 | Mexico City     | Human | Female  | 21      | unknown  | Original | Oropharyngeal swab  |
| hCoV-19/Mexico/CMX-INMEGEN-02-07-07/2021   | EPI_ISL_1081162 | 09/02/2021 | Mexico City     | Human | Female  | 65      | unknown  | Original | Oropharyngeal swab  |
| hCoV-19/Mexico/CMX-INMEGEN-02-07-08/2021   | EPI_ISL_1081163 | 09/02/2021 | Mexico City     | Human | Female  | 75      | unknown  | Original | Oropharyngeal swab  |
| hCoV-19/Mexico/CMX-INMEGEN-02-07-10/2021   | EPI_ISL_1081164 | 09/02/2021 | Mexico City     | Human | Female  | 35      | unknown  | Original | Oropharyngeal swab  |
| hCoV-19/Mexico/CMX-INMEGEN-02-11-04/2021   | EPI_ISL_1117356 | 09/02/2021 | Mexico City     | Human | Male    | 71      | unknown  | Original | Oropharyngeal swab  |
| hCoV-19/Mexico/CMX-INMEGEN-02-11-05/2021   | EPI_ISL_1117357 | 09/02/2021 | Mexico City     | Human | Female  | 29      | unknown  | Original | Oropharyngeal swab  |
| hCoV-19/Mexico/CMX-INMEGEN-02-11-07/2021   | EPI_ISL_1117359 | 09/02/2021 | Mexico City     | Human | Female  | 64      | unknown  | Original | Oropharyngeal swab  |
| hCoV-19/Mexico/CMX-INMEGEN-02-11-08/2021   | EPI_ISL_1117360 | 09/02/2021 | Mexico City     | Human | Female  | 55      | unknown  | Original | Oropharyngeal swab  |
| hCoV-19/Mexico/CMX-INMEGEN-02-11-12/2021   | EPI_ISL_1117364 | 09/02/2021 | Mexico City     | Human | Male    | 33      | unknown  | Original | Oropharyngeal swab  |
| hCoV-19/Mexico/CMX-INMEGEN-02-11-13/2021   | EPI_ISL_1117365 | 09/02/2021 | Mexico City     | Human | Male    | 76      | unknown  | Original | Oropharyngeal swab  |
| hCoV-19/Mexico/CMX-INMEGEN-02-11-20/2021   | EPI_ISL_1117372 | 09/02/2021 | Mexico City     | Human | Male    | 39      | unknown  | Original | Oropharyngeal swab  |
| hCoV-19/Mexico/CMX-INMEGEN-02-11-23/2021   | EPI_ISL_1117375 | 09/02/2021 | Mexico City     | Human | Male    | 68      | unknown  | Original | Oropharyngeal swab  |
| hCoV-19/Mexico/SIN_CIAD_S5894/2021         | EPI_ISL_1491364 | 09/02/2021 | Sinaloa         | Human | Male    | 82      | unknown  | Original | Oropharyngeal swab  |
| hCoV-19/Mexico/CMX-INMEGEN-02-07-01/2021   | EPI_ISL_1081152 | 10/02/2021 | Mexico City     | Human | Female  | 63      | unknown  | Original | Oropharyngeal swab  |
| hCoV-19/Mexico/CMX-INMEGEN-02-07-02/2021   | EPI_ISL_1081153 | 10/02/2021 | Mexico City     | Human | Female  | 58      | unknown  | Original | Oropharyngeal swab  |
| hCoV-19/Mexico/CMX-INMEGEN-02-07-03/2021   | EPI_ISL_1081154 | 10/02/2021 | Mexico City     | Human | Female  | 68      | unknown  | Original | Oropharyngeal swab  |
| hCoV-19/Mexico/CMX-INMEGEN-02-07-04/2021   | EPI_ISL_1081155 | 10/02/2021 | Mexico City     | Human | Male    | 80      | unknown  | Original | Oropharyngeal swab  |
| hCoV-19/Mexico/CMX-INMEGEN-02-07-13/2021   | EPI_ISL_1081156 | 10/02/2021 | Mexico City     | Human | Female  | 29      | unknown  | Original | Oropharyngeal swab  |
| hCoV-19/Mexico/CMX-INMEGEN-02-07-17/2021   | EPI_ISL_1081158 | 10/02/2021 | Mexico City     | Human | Male    | 14      | unknown  | Original | Oropharyngeal swab  |
| hCoV-19/Mexico/CMX-INMEGEN-02-07-18/2021   | EPI_ISL_1081159 | 10/02/2021 | Mexico City     | Human | Female  | 28      | unknown  | Original | Oropharyngeal swab  |
| hCoV-19/Mexico/CMX-INMEGEN-02-07-19/2021   | EPI_ISL_1081160 | 10/02/2021 | Mexico City     | Human | Female  | 66      | unknown  | Original | Oropharyngeal swab  |
| hCoV-19/Mexico/CMX-INMEGEN-02-07-20/2021   | EPI_ISL_1081161 | 10/02/2021 | Mexico City     | Human | Male    | 50      | unknown  | Original | Oropharyngeal swab  |
| hCoV-19/Mexico/CMX-INMEGEN-02-07-16/2021   | EPI_ISL_1095495 | 10/02/2021 | Mexico City     | Human | Male    | 66      | unknown  | Original | Oropharyngeal swab  |
| hCoV-19/Mexico/CMX-INMEGEN-02-11-19/2021   | EPI_ISL_1117371 | 10/02/2021 | Mexico City     | Human | Female  | 57      | unknown  | Original | Oropharyngeal swab  |
| hCoV-19/Mexico/CMX-INMEGEN-02-11-21/2021   | EPI_ISL_1117373 | 10/02/2021 | Mexico City     | Human | Male    | 61      | unknown  | Original | Oropharyngeal swab  |
| hCoV-19/Mexico/CMX-INMEGEN-02-11-22/2021   | EPI_ISL_1117374 | 10/02/2021 | Mexico City     | Human | Female  | 43      | unknown  | Original | Oropharyngeal swab  |
| hCoV-19/Mexico/CMX-INMEGEN-02-12-03/2021   | EPI_ISL_1120880 | 10/02/2021 | Mexico City     | Human | Male    | 57      | unknown  | Original | Oropharyngeal swab  |
| hCoV-19/Mexico/CMX-INMEGEN-02-12-04/2021   | EPI_ISL_1120881 | 10/02/2021 | Mexico City     | Human | Male    | 39      | unknown  | Original | Oropharyngeal swab  |
| hCoV-19/Mexico/CMX-INMEGEN-02-12-06/2021   | EPI_ISL_1120883 | 10/02/2021 | Mexico City     | Human | Female  | 63      | unknown  | Original | Oropharyngeal swab  |
| hCoV-19/Mexico/CMX-INMEGEN-02-12-07/2021   | EPI_ISL_1120884 | 10/02/2021 | Mexico City     | Human | Female  | 53      | unknown  | Original | Oropharyngeal swab  |
| hCoV-19/Mexico/CMX-INMEGEN-02-12-08/2021   | EPI_ISL_1120885 | 10/02/2021 | Mexico City     | Human | Male    | 47      | unknown  | Original | Oropharyngeal swab  |
| hCoV-19/Mexico/BCN-SEARCH-7360/2021        | EPI_ISL_1295671 | 10/02/2021 | Baja California | Human | unknown | unknown | unknown  | Original | Nasal swab          |
| hCoV-19/Mexico/JAL-InDRE_F103G_S579/2021   | EPI_ISL_1324762 | 10/02/2021 | Jalisco         | Human | Male    | 34      | Released | Original | Oropharyngeal swab  |
| hCoV-19/Mexico/JAL-InDRE_F104G_S580/2021   | EPI_ISL_1324763 | 10/02/2021 | Jalisco         | Human | Female  | 34      | Released | Original | Oropharyngeal swab  |
| hCoV-19/Mexico/CMX-INER-INMEGEN-00036/2021 | EPI_ISL_1406751 | 11/02/2021 | Mexico City     | Human | Male    | 22      | unknown  | Original |                     |
| hCoV-19/Mexico/CMX-INCMNSZ_COV159238/2021  | EPI_ISL_1502815 | 11/02/2021 | Mexico City     | Human | Male    | 66      | Deceased | Original | Nasopharyngeal swab |
| hCoV-19/Mexico/CMX-INMEGEN-02-12-02/2021   | EPI_ISL_1120879 | 11/02/2021 | Mexico City     | Human | Male    | 56      | unknown  | Original | Oropharyngeal swab  |
| hCoV-19/Mexico/CMX-INMEGEN-02-12-05/2021   | EPI_ISL_1120882 | 11/02/2021 | Mexico City     | Human | Male    | 76      | unknown  | Original | Oropharyngeal swab  |
| hCoV-19/Mexico/CMX-INMEGEN-03-05-21/2021   | EPI_ISL_1262717 | 11/02/2021 | Mexico City     | Human | Male    | 7       | unknown  | Original | Oropharyngeal swab  |

|                                           |                 |            |                 |       |         |         |              |          |                    |
|-------------------------------------------|-----------------|------------|-----------------|-------|---------|---------|--------------|----------|--------------------|
| hCoV-19/Mexico/TAM-InDRE_455/2021         | EPI_ISL_1219715 | 11/02/2021 | Tamaulipas      | Human | Male    | 1       | Released     | Original | Oropharyngeal swab |
| hCoV-19/Mexico/CMX-INMEGEN-02-12-01/2021  | EPI_ISL_1120878 | 12/02/2021 | Mexico City     | Human | Female  | 28      | unknown      | Original | Oropharyngeal swab |
| hCoV-19/Mexico/CMX-INMEGEN-02-12-15/2021  | EPI_ISL_1120890 | 12/02/2021 | Mexico City     | Human | Male    | 18      | unknown      | Original | Oropharyngeal swab |
| hCoV-19/Mexico/CMX-INMEGEN-02-12-14/2021  | EPI_ISL_1133103 | 12/02/2021 | Mexico City     | Human | Male    | 15      | unknown      | Original |                    |
| hCoV-19/Mexico/CMX-INMEGEN-03-01-04/2021  | EPI_ISL_1168637 | 12/02/2021 | Mexico City     | Human | Male    | 57      | unknown      | Original | Oropharyngeal swab |
| hCoV-19/Mexico/BCN-SEARCH-7391/2021       | EPI_ISL_1295691 | 12/02/2021 | Baja California | Human | unknown | unknown | unknown      | Original | Nasal swab         |
| hCoV-19/Mexico/CMX-INMEGEN-02-12-11/2021  | EPI_ISL_1120888 | 13/02/2021 | Mexico City     | Human | Female  | 66      | unknown      | Original | Oropharyngeal swab |
| hCoV-19/Mexico/CMX-INMEGEN-02-12-13/2021  | EPI_ISL_1120889 | 13/02/2021 | Mexico City     | Human | Female  | 21      | unknown      | Original | Oropharyngeal swab |
| hCoV-19/Mexico/CMX-INMEGEN-02-12-19/2021  | EPI_ISL_1120891 | 13/02/2021 | Mexico City     | Human | Female  | 66      | unknown      | Original | Oropharyngeal swab |
| hCoV-19/Mexico/YUC-InDRE_F9951_S624/2021  | EPI_ISL_1340661 | 14/02/2021 | Yucatan         | Human | Female  | 39      | Released     | Original | Oropharyngeal swab |
| hCoV-19/Mexico/ZAC-InDRE_F10107_S573/2021 | EPI_ISL_1335757 | 15/02/2021 | Zacatecas       | Human | Female  | 40      | Released     | Original | Oropharyngeal swab |
| hCoV-19/Mexico/NLE-InDRE_F10500_S673/2021 | EPI_ISL_1365639 | 15/02/2021 | Nuevo Leon      | Human | Female  | 28      | Released     | Original | Oropharyngeal swab |
| hCoV-19/Mexico/NLE-InDRE_F10501_S674/2021 | EPI_ISL_1365640 | 15/02/2021 | Nuevo Leon      | Human | Male    | 62      | Hospitalized | Original | Oropharyngeal swab |
| hCoV-19/Mexico/NLE-InDRE_F10517_S677/2021 | EPI_ISL_1365643 | 15/02/2021 | Nuevo Leon      | Human | Female  | 71      | Released     | Original | Oropharyngeal swab |
| hCoV-19/Mexico/NLE-InDRE_F10518_S678/2021 | EPI_ISL_1365644 | 15/02/2021 | Nuevo Leon      | Human | Female  | 46      | Released     | Original | Oropharyngeal swab |
| hCoV-19/Mexico/TAM-InDRE_F10561_S683/2021 | EPI_ISL_1365649 | 15/02/2021 | Tamaulipas      | Human | Female  | 74      | Deceased     | Original | Oropharyngeal swab |
| hCoV-19/Mexico/MOR-InDRE_F10622_S686/2021 | EPI_ISL_1365651 | 15/02/2021 | Morelos         | Human | Male    | 49      | Released     | Original | Oropharyngeal swab |
| hCoV-19/Mexico/MOR-InDRE_F10623_S687/2021 | EPI_ISL_1365652 | 15/02/2021 | Morelos         | Human | Female  | 89      | Released     | Original | Oropharyngeal swab |
| hCoV-19/Mexico/VER-InDRE_F10678_S691/2021 | EPI_ISL_1365656 | 15/02/2021 | Veracruz        | Human | Male    | 24      | Released     | Original | Oropharyngeal swab |
| hCoV-19/Mexico/ROO-InDRE_F10710_S696/2021 | EPI_ISL_1365661 | 15/02/2021 | Quintana Roo    | Human | Male    | 38      | Released     | Original | Oropharyngeal swab |
| hCoV-19/Mexico/SIN-CIAD-S5971/2021        | EPI_ISL_1482627 | 15/02/2021 | Sinaloa         | Human | Male    | 40      | unknown      | Original | Oropharyngeal swab |
| hCoV-19/Mexico/SIN-CIAD-S5975/2021        | EPI_ISL_1660616 | 15/02/2021 | Sinaloa         | Human | Male    | 41      | unknown      | Original | Oropharyngeal swab |
| hCoV-19/Mexico/CMX-INMEGEN-02-12-09/2021  | EPI_ISL_1120886 | 15/02/2021 | Mexico City     | Human | Female  | 14      | unknown      | Original | Oropharyngeal swab |
| hCoV-19/Mexico/CMX-INMEGEN-02-12-10/2021  | EPI_ISL_1120887 | 15/02/2021 | Mexico City     | Human | Female  | 67      | unknown      | Original | Oropharyngeal swab |
| hCoV-19/Mexico/CMX-INMEGEN-02-12-20/2021  | EPI_ISL_1120892 | 15/02/2021 | Mexico City     | Human | Female  | 38      | unknown      | Original | Oropharyngeal swab |
| hCoV-19/Mexico/CMX-INMEGEN-02-12-21/2021  | EPI_ISL_1120893 | 15/02/2021 | Mexico City     | Human | Female  | 76      | unknown      | Original | Oropharyngeal swab |
| hCoV-19/Mexico/CMX-INMEGEN-02-12-22/2021  | EPI_ISL_1120894 | 15/02/2021 | Mexico City     | Human | Male    | 45      | unknown      | Original | Oropharyngeal swab |
| hCoV-19/Mexico/CMX-INMEGEN-02-12-23/2021  | EPI_ISL_1120895 | 15/02/2021 | Mexico City     | Human | Male    | 17      | unknown      | Original | Oropharyngeal swab |
| hCoV-19/Mexico/CMX-INMEGEN-02-12-24/2021  | EPI_ISL_1120896 | 15/02/2021 | Mexico City     | Human | Female  | 28      | unknown      | Original | Oropharyngeal swab |
| hCoV-19/Mexico/CMX-INMEGEN-03-01-01/2021  | EPI_ISL_1168634 | 15/02/2021 | Mexico City     | Human | Female  | 49      | unknown      | Original | Oropharyngeal swab |
| hCoV-19/Mexico/CMX-INMEGEN-03-01-02/2021  | EPI_ISL_1168635 | 15/02/2021 | Mexico City     | Human | Male    | 64      | unknown      | Original | Oropharyngeal swab |
| hCoV-19/Mexico/CMX-INMEGEN-03-01-03/2021  | EPI_ISL_1168636 | 15/02/2021 | Mexico City     | Human | Female  | 59      | unknown      | Original | Oropharyngeal swab |
| hCoV-19/Mexico/CMX-INMEGEN-03-01-05/2021  | EPI_ISL_1168638 | 15/02/2021 | Mexico City     | Human | Male    | 66      | unknown      | Original | Oropharyngeal swab |
| hCoV-19/Mexico/CMX-INMEGEN-03-01-06/2021  | EPI_ISL_1168639 | 15/02/2021 | Mexico City     | Human | Male    | 66      | unknown      | Original | Oropharyngeal swab |
| hCoV-19/Mexico/CMX-INMEGEN-03-01-07/2021  | EPI_ISL_1168640 | 15/02/2021 | Mexico City     | Human | Female  | 52      | unknown      | Original | Oropharyngeal swab |
| hCoV-19/Mexico/CMX-INMEGEN-03-01-08/2021  | EPI_ISL_1168641 | 15/02/2021 | Mexico City     | Human | Female  | 60      | unknown      | Original | Oropharyngeal swab |
| hCoV-19/Mexico/JAL-InDRE_F99G_S575/2021   | EPI_ISL_1324758 | 15/02/2021 | Jalisco         | Human | Male    | 24      | Released     | Original | Oropharyngeal swab |
| hCoV-19/Mexico/GUA-InDRE_F10341_S587/2021 | EPI_ISL_1337363 | 15/02/2021 | Guanajuato      | Human | Male    | 51      | Released     | Original | Oropharyngeal swab |
| hCoV-19/Mexico/NLE-InDRE_F10502_S714/2021 | EPI_ISL_1366663 | 15/02/2021 | Nuevo Leon      | Human | Male    | 41      | Hospitalized | Original | Oropharyngeal swab |
| hCoV-19/Mexico/MOR-InDRE_F10626_S728/2021 | EPI_ISL_1366677 | 15/02/2021 | Morelos         | Human | Female  | 74      | Released     | Original | Oropharyngeal swab |
| hCoV-19/Mexico/CMX-InDRE_F10721_S738/2021 | EPI_ISL_1366687 | 15/02/2021 | Mexico City     | Human | Male    | 34      | Released     | Original | Oropharyngeal swab |

|                                            |                 |            |             |       |        |    |              |          |                    |
|--------------------------------------------|-----------------|------------|-------------|-------|--------|----|--------------|----------|--------------------|
| hCoV-19/Mexico/CMX-InDRE_F10724_S739/2021  | EPI_ISL_1366688 | 15/02/2021 | Mexico City | Human | Male   | 45 | Deceased     | Original | Oropharyngeal swab |
| hCoV-19/Mexico/CMX-INMEGEN-03-09-76/2021   | EPI_ISL_1406126 | 15/02/2021 | Mexico City | Human | Male   | 55 | unknown      | Original | Oropharyngeal swab |
| hCoV-19/Mexico/YUC-InDRE_F9948_S805/2021   | EPI_ISL_1424007 | 15/02/2021 | Yucatan     | Human | Male   | 42 | Released     | Original | Oropharyngeal swab |
| hCoV-19/Mexico/COA-InDRE_514/2021          | EPI_ISL_1168584 | 15/02/2021 | Coahuila    | Human | Female | 48 | Released     | Original | Oropharyngeal swab |
| hCoV-19/Mexico/COA-InDRE_515/2021          | EPI_ISL_1168585 | 15/02/2021 | Coahuila    | Human | Female | 25 | Released     | Original | Oropharyngeal swab |
| hCoV-19/Mexico/CMX-INMEGEN-03-04-07/2021   | EPI_ISL_1205209 | 15/02/2021 | Mexico City | Human | Female | 59 | unknown      | Original | Oropharyngeal swab |
| hCoV-19/Mexico/QUE-InDRE_F89B_S611/2021    | EPI_ISL_1340654 | 15/02/2021 | Queretaro   | Human | Female | 28 | Released     | Original | Oropharyngeal swab |
| hCoV-19/Mexico/QUE-InDRE_F9839_S618/2021   | EPI_ISL_1340655 | 15/02/2021 | Queretaro   | Human | Male   | 58 | Released     | Original | Oropharyngeal swab |
| hCoV-19/Mexico/QUE-InDRE_F9841_S619/2021   | EPI_ISL_1340657 | 15/02/2021 | Queretaro   | Human | Female | 46 | Released     | Original | Oropharyngeal swab |
| hCoV-19/Mexico/YUC-InDRE_F9950_S623/2021   | EPI_ISL_1340658 | 15/02/2021 | Yucatan     | Human | Female | 44 | Released     | Original | Oropharyngeal swab |
| hCoV-19/Mexico/ZAC-InDRE_F10108_S625/2021  | EPI_ISL_1340660 | 15/02/2021 | Zacatecas   | Human | Female | 68 | Released     | Original | Oropharyngeal swab |
| hCoV-19/Mexico/NLE-InDRE_F10504_S857/2021  | EPI_ISL_1399262 | 15/02/2021 | Nuevo Leon  | Human | Female | 26 | Released     | Original | Oropharyngeal swab |
| hCoV-19/Mexico/JAL-InDRE-F11743-S1186/2021 | EPI_ISL_1558832 | 15/02/2021 | Jalisco     | Human | Female | 70 | Released     | Original | Oropharyngeal swab |
| hCoV-19/Mexico/JAL-InDRE-F11744-S913/2021  | EPI_ISL_1558833 | 15/02/2021 | Jalisco     | Human | Male   | 69 | Released     | Original | Oropharyngeal swab |
| hCoV-19/Mexico/QUE-InDRE_F9840_S649/2021   | EPI_ISL_1359064 | 15/02/2021 | Queretaro   | Human | Male   | 57 | Released     | Original | Oropharyngeal swab |
| hCoV-19/Mexico/YUC-InDRE_F9942_S651/2021   | EPI_ISL_1359066 | 15/02/2021 | Yucatan     | Human | Male   | 28 | Released     | Original | Oropharyngeal swab |
| hCoV-19/Mexico/YUC-InDRE_F9953_S652/2021   | EPI_ISL_1359067 | 15/02/2021 | Yucatan     | Human | Male   | 62 | Hospitalized | Original | Oropharyngeal swab |
| hCoV-19/Mexico/GUA-InDRE_F10376_S662/2021  | EPI_ISL_1359077 | 15/02/2021 | Guanajuato  | Human | Female | 20 | Released     | Original | Oropharyngeal swab |
| hCoV-19/Mexico/GUA-InDRE_F10377_S663/2021  | EPI_ISL_1359078 | 15/02/2021 | Guanajuato  | Human | Female | 60 | Released     | Original | Oropharyngeal swab |
| hCoV-19/Mexico/SIN_CIAD_S5976/2021         | EPI_ISL_1627079 | 15/02/2021 | Sinaloa     | Human | Male   | 83 | unknown      | Original | Oropharyngeal swab |
| hCoV-19/Mexico/NLE-InDRE_F10506_S675/2021  | EPI_ISL_1365641 | 16/02/2021 | Nuevo Leon  | Human | Female | 58 | Released     | Original | Oropharyngeal swab |
| hCoV-19/Mexico/NLE-InDRE_F10507_S676/2021  | EPI_ISL_1365642 | 16/02/2021 | Nuevo Leon  | Human | Female | 57 | Released     | Original | Oropharyngeal swab |
| hCoV-19/Mexico/NLE-InDRE_F10519_S679/2021  | EPI_ISL_1365645 | 16/02/2021 | Nuevo Leon  | Human | Male   | 59 | Released     | Original | Oropharyngeal swab |
| hCoV-19/Mexico/NLE-InDRE_F10520_S680/2021  | EPI_ISL_1365646 | 16/02/2021 | Nuevo Leon  | Human | Male   | 37 | Released     | Original | Oropharyngeal swab |
| hCoV-19/Mexico/NLE-InDRE_F10521_S681/2021  | EPI_ISL_1365647 | 16/02/2021 | Nuevo Leon  | Human | Female | 40 | Released     | Original | Oropharyngeal swab |
| hCoV-19/Mexico/NLE-InDRE_F10522_S682/2021  | EPI_ISL_1365648 | 16/02/2021 | Nuevo Leon  | Human | Female | 7  | Released     | Original | Oropharyngeal swab |
| hCoV-19/Mexico/MOR-InDRE_F10613_S685/2021  | EPI_ISL_1365650 | 16/02/2021 | Morelos     | Human | Male   | 67 | Hospitalized | Original | Oropharyngeal swab |
| hCoV-19/Mexico/MOR-InDRE_F10627_S688/2021  | EPI_ISL_1365653 | 16/02/2021 | Morelos     | Human | Male   | 30 | Released     | Original | Oropharyngeal swab |
| hCoV-19/Mexico/MOR-InDRE_F10635_S689/2021  | EPI_ISL_1365654 | 16/02/2021 | Morelos     | Human | Male   | 26 | Released     | Original | Oropharyngeal swab |
| hCoV-19/Mexico/CMX-InDRE_F10682_S692/2021  | EPI_ISL_1365657 | 16/02/2021 | Mexico City | Human | Male   | 74 | Deceased     | Original | Oropharyngeal swab |
| hCoV-19/Mexico/CMX-INMEGEN-03-02-10/2021   | EPI_ISL_1181707 | 16/02/2021 | Mexico City | Human | Male   | 38 | unknown      | Original | Oropharyngeal swab |
| hCoV-19/Mexico/JAL-InDRE_F100G_S576/2021   | EPI_ISL_1324759 | 16/02/2021 | Jalisco     | Human | Female | 34 | Released     | Original | Oropharyngeal swab |
| hCoV-19/Mexico/QUE-InDRE_F9845_S585/2021   | EPI_ISL_1337360 | 16/02/2021 | Queretaro   | Human | Female | 49 | Released     | Original | Oropharyngeal swab |
| hCoV-19/Mexico/QUE-InDRE_F9846_S586/2021   | EPI_ISL_1337362 | 16/02/2021 | Queretaro   | Human | Male   | 43 | Released     | Original | Oropharyngeal swab |
| hCoV-19/Mexico/NLE-InDRE_F10524_S590/2021  | EPI_ISL_1337368 | 16/02/2021 | Nuevo Leon  | Human | Male   | 31 | Released     | Original | Oropharyngeal swab |
| hCoV-19/Mexico/JAL-InDRE_F10432_S712/2021  | EPI_ISL_1366661 | 16/02/2021 | Jalisco     | Human | Male   | 78 | Released     | Original | Oropharyngeal swab |
| hCoV-19/Mexico/NLE-InDRE_F10523_S716/2021  | EPI_ISL_1366665 | 16/02/2021 | Nuevo Leon  | Human | Male   | 69 | Released     | Original | Oropharyngeal swab |
| hCoV-19/Mexico/QUE-InDRE_F10573_S718/2021  | EPI_ISL_1366667 | 16/02/2021 | Queretaro   | Human | Male   | 34 | Released     | Original | Oropharyngeal swab |
| hCoV-19/Mexico/QUE-InDRE_F10577_S719/2021  | EPI_ISL_1366668 | 16/02/2021 | Queretaro   | Human | Male   | 50 | Released     | Original | Oropharyngeal swab |
| hCoV-19/Mexico/VER-InDRE_F10679_S736/2021  | EPI_ISL_1366685 | 16/02/2021 | Veracruz    | Human | Female | 77 | Released     | Original | Oropharyngeal swab |
| hCoV-19/Mexico/CMX-InDRE_F10723_S740/2021  | EPI_ISL_1366689 | 16/02/2021 | Mexico City | Human | Female | 62 | Released     | Original | Oropharyngeal swab |

|                                           |                 |            |                 |       |         |         |              |          |                    |
|-------------------------------------------|-----------------|------------|-----------------|-------|---------|---------|--------------|----------|--------------------|
| hCoV-19/Mexico/GUA-InDRE_F10342_S808/2021 | EPI_ISL_1424010 | 16/02/2021 | Guanajuato      | Human | Male    | 65      | Hospitalized | Original | Oropharyngeal swab |
| hCoV-19/Mexico/GUA-InDRE_F10343_S809/2021 | EPI_ISL_1424011 | 16/02/2021 | Guanajuato      | Human | Male    | 57      | Hospitalized | Original | Oropharyngeal swab |
| hCoV-19/Mexico/GUA-InDRE_F10344_S810/2021 | EPI_ISL_1424012 | 16/02/2021 | Guanajuato      | Human | Male    | 40      | Hospitalized | Original | Oropharyngeal swab |
| hCoV-19/Mexico/MOR-InDRE_F10634_S815/2021 | EPI_ISL_1424017 | 16/02/2021 | Morelos         | Human | Female  | 25      | Released     | Original | Oropharyngeal swab |
| hCoV-19/Mexico/QUE-InDRE_F88B_S610/2021   | EPI_ISL_1340634 | 16/02/2021 | Queretaro       | Human | Male    | 40      | Released     | Original | Oropharyngeal swab |
| hCoV-19/Mexico/QUE-InDRE_F9843_S620/2021  | EPI_ISL_1340636 | 16/02/2021 | Queretaro       | Human | Male    | 24      | Released     | Original | Oropharyngeal swab |
| hCoV-19/Mexico/QUE-InDRE_F9847_S621/2021  | EPI_ISL_1340637 | 16/02/2021 | Queretaro       | Human | Female  | 34      | Released     | Original | Oropharyngeal swab |
| hCoV-19/Mexico/QUE-InDRE_F9848_S622/2021  | EPI_ISL_1340639 | 16/02/2021 | Queretaro       | Human | Female  | 39      | Released     | Original | Oropharyngeal swab |
| hCoV-19/Mexico/HID-InDRE_F10298_S626/2021 | EPI_ISL_1340640 | 16/02/2021 | Hidalgo         | Human | Male    | 51      | Deceased     | Original | Oropharyngeal swab |
| hCoV-19/Mexico/HID-InDRE_F10306_S627/2021 | EPI_ISL_1340642 | 16/02/2021 | Hidalgo         | Human | Male    | 68      | Hospitalized | Original | Oropharyngeal swab |
| hCoV-19/Mexico/GUA-InDRE_F10333_S628/2021 | EPI_ISL_1340643 | 16/02/2021 | Guanajuato      | Human | Female  | 43      | Deceased     | Original | Oropharyngeal swab |
| hCoV-19/Mexico/GUA-InDRE_F10345_S629/2021 | EPI_ISL_1340644 | 16/02/2021 | Guanajuato      | Human | Male    | 52      | Hospitalized | Original | Oropharyngeal swab |
| hCoV-19/Mexico/GUA-InDRE_F10347_S630/2021 | EPI_ISL_1340646 | 16/02/2021 | Guanajuato      | Human | Female  | 90      | Hospitalized | Original | Oropharyngeal swab |
| hCoV-19/Mexico/GUA-InDRE_F10379_S638/2021 | EPI_ISL_1340647 | 16/02/2021 | Guanajuato      | Human | Female  | 18      | Released     | Original | Oropharyngeal swab |
| hCoV-19/Mexico/GUA-InDRE_F10380_S639/2021 | EPI_ISL_1340648 | 16/02/2021 | Guanajuato      | Human | Male    | 21      | Released     | Original | Oropharyngeal swab |
| hCoV-19/Mexico/GUA-InDRE_F10381_S640/2021 | EPI_ISL_1340650 | 16/02/2021 | Guanajuato      | Human | Male    | 33      | Released     | Original | Oropharyngeal swab |
| hCoV-19/Mexico/PUE-InDRE_F10410_S645/2021 | EPI_ISL_1340651 | 16/02/2021 | Puebla          | Human | Male    | 49      | Released     | Original | Oropharyngeal swab |
| hCoV-19/Mexico/PUE-InDRE_F10412_S646/2021 | EPI_ISL_1340652 | 16/02/2021 | Puebla          | Human | Female  | 63      | Released     | Original | Oropharyngeal swab |
| hCoV-19/Mexico/SEARCH-7817/2021           | EPI_ISL_1366325 | 16/02/2021 | Baja California | Human | unknown | unknown | unknown      | Original | Nasal swab         |
| hCoV-19/Mexico/SEARCH-7939/2021           | EPI_ISL_1366334 | 16/02/2021 | Baja California | Human | unknown | unknown | unknown      | Original | Nasal swab         |
| hCoV-19/Mexico/NLE-InDRE_F10509_S858/2021 | EPI_ISL_1399263 | 16/02/2021 | Nuevo Leon      | Human | Female  | 72      | Hospitalized | Original | Oropharyngeal swab |
| hCoV-19/Mexico/TAM-InDRE_F11051_S870/2021 | EPI_ISL_1399275 | 16/02/2021 | Tamaulipas      | Human | Female  | 71      | Deceased     | Original | Oropharyngeal swab |
| hCoV-19/Mexico/CMX-INMEGEN-03-11-17/2021  | EPI_ISL_1591476 | 16/02/2021 | Mexico City     | Human | Male    | 24      | unknown      | Original | Oropharyngeal swab |
| hCoV-19/Mexico/QUE-InDRE_F9844_S650/2021  | EPI_ISL_1359065 | 16/02/2021 | Queretaro       | Human | Male    | 25      | Released     | Original | Oropharyngeal swab |
| hCoV-19/Mexico/ZAC-InDRE_F10109_S653/2021 | EPI_ISL_1359068 | 16/02/2021 | Zacatecas       | Human | Male    | 56      | Released     | Original | Oropharyngeal swab |
| hCoV-19/Mexico/ZAC-InDRE_F10118_S654/2021 | EPI_ISL_1359069 | 16/02/2021 | Zacatecas       | Human | Female  | 50      | Hospitalized | Original | Oropharyngeal swab |
| hCoV-19/Mexico/GUA-InDRE_F10378_S664/2021 | EPI_ISL_1359079 | 16/02/2021 | Guanajuato      | Human | Female  | 13      | Released     | Original | Oropharyngeal swab |
| hCoV-19/Mexico/CMX-INER-INMEGEN-00037/202 | EPI_ISL_1406752 | 17/02/2021 | Mexico City     | Human | Female  | 57      | unknown      | Original |                    |
| hCoV-19/Mexico/CMX-INER-INMEGEN-00038/202 | EPI_ISL_1406753 | 17/02/2021 | Mexico City     | Human | Female  | 49      | unknown      | Original |                    |
| hCoV-19/Mexico/CMX-INER-INMEGEN-00039/202 | EPI_ISL_1406754 | 17/02/2021 | Mexico City     | Human | Male    | 40      | unknown      | Original |                    |
| hCoV-19/Mexico/CMX-INER-INMEGEN-00040/202 | EPI_ISL_1406755 | 17/02/2021 | Mexico City     | Human | Female  | 18      | unknown      | Original |                    |
| hCoV-19/Mexico/CMX-INER-INMEGEN-00041/202 | EPI_ISL_1406756 | 17/02/2021 | Mexico City     | Human | Female  | 43      | unknown      | Original |                    |
| hCoV-19/Mexico/CMX-INER-INMEGEN-00043/202 | EPI_ISL_1406757 | 17/02/2021 | Mexico City     | Human | Male    | 34      | unknown      | Original |                    |
| hCoV-19/Mexico/CMX-INER-INMEGEN-00044/202 | EPI_ISL_1406758 | 17/02/2021 | Mexico City     | Human | Female  | 36      | unknown      | Original |                    |
| hCoV-19/Mexico/CMX-INMEGEN-03-01-09/2021  | EPI_ISL_1168642 | 17/02/2021 | Mexico City     | Human | Male    | 22      | unknown      | Original | Oropharyngeal swab |
| hCoV-19/Mexico/CMX-INMEGEN-03-01-10/2021  | EPI_ISL_1168643 | 17/02/2021 | Mexico City     | Human | Female  | 46      | unknown      | Original | Oropharyngeal swab |
| hCoV-19/Mexico/CMX-INMEGEN-03-01-11/2021  | EPI_ISL_1168644 | 17/02/2021 | Mexico City     | Human | Male    | 17      | unknown      | Original | Oropharyngeal swab |
| hCoV-19/Mexico/CMX-INMEGEN-03-02-11/2021  | EPI_ISL_1181708 | 17/02/2021 | Mexico City     | Human | Female  | 57      | unknown      | Original | Oropharyngeal swab |
| hCoV-19/Mexico/CMX-INMEGEN-03-02-12/2021  | EPI_ISL_1181709 | 17/02/2021 | Mexico City     | Human | Male    | 58      | unknown      | Original | Oropharyngeal swab |
| hCoV-19/Mexico/BCN-SEARCH-7441/2021       | EPI_ISL_1295730 | 17/02/2021 | Baja California | Human | unknown | unknown | unknown      | Original | Nasal swab         |
| hCoV-19/Mexico/TAM-InDRE_F86L_S567/2021   | EPI_ISL_1334380 | 17/02/2021 | Tamaulipas      | Human | Male    | 35      | Released     | Original | Oropharyngeal swab |



|                                           |                 |            |                     |       |        |         |              |          |                    |
|-------------------------------------------|-----------------|------------|---------------------|-------|--------|---------|--------------|----------|--------------------|
| hCoV-19/Mexico/GUA-InDRE_F10390_S589/2021 | EPI_ISL_1337367 | 17/02/2021 | Guanajuato          | Human | Male   | 24      | Released     | Original | Oropharyngeal swab |
| hCoV-19/Mexico/BCS-InDRE_F10705_S594/2021 | EPI_ISL_1337374 | 17/02/2021 | Baja California Sur | Human | Female | 67      | Deceased     | Original | Oropharyngeal swab |
| hCoV-19/Mexico/NLE-InDRE_F10511_S715/2021 | EPI_ISL_1366664 | 17/02/2021 | Nuevo Leon          | Human | Female | 54      | Released     | Original | Oropharyngeal swab |
| hCoV-19/Mexico/QUE-InDRE_F10583_S720/2021 | EPI_ISL_1366669 | 17/02/2021 | Queretaro           | Human | Female | 27      | Released     | Original | Oropharyngeal swab |
| hCoV-19/Mexico/MOR-InDRE_F10650_S729/2021 | EPI_ISL_1366678 | 17/02/2021 | Morelos             | Human | Male   | 76      | Released     | Original | Oropharyngeal swab |
| hCoV-19/Mexico/MOR-InDRE_F10656_S731/2021 | EPI_ISL_1366680 | 17/02/2021 | Morelos             | Human | Male   | 83      | Hospitalized | Original | Oropharyngeal swab |
| hCoV-19/Mexico/CMX-INMEGEN-03-09-77/2021  | EPI_ISL_1406127 | 17/02/2021 | Mexico City         | Human | Female | 57      | unknown      | Original | Oropharyngeal swab |
| hCoV-19/Mexico/CMX-INMEGEN-03-09-79/2021  | EPI_ISL_1406128 | 17/02/2021 | Mexico City         | Human | Male   | 40      | unknown      | Original | Oropharyngeal swab |
| hCoV-19/Mexico/CMX-INMEGEN-03-09-80/2021  | EPI_ISL_1406129 | 17/02/2021 | Mexico City         | Human | Female | 49      | unknown      | Original | Oropharyngeal swab |
| hCoV-19/Mexico/CMX-INMEGEN-03-09-81/2021  | EPI_ISL_1406130 | 17/02/2021 | Mexico City         | Human | Female | 16      | unknown      | Original | Oropharyngeal swab |
| hCoV-19/Mexico/CMX-INMEGEN-03-09-82/2021  | EPI_ISL_1406131 | 17/02/2021 | Mexico City         | Human | Female | 18      | unknown      | Original | Oropharyngeal swab |
| hCoV-19/Mexico/CMX-INMEGEN-03-09-83/2021  | EPI_ISL_1406132 | 17/02/2021 | Mexico City         | Human | Female | 3       | unknown      | Original | Oropharyngeal swab |
| hCoV-19/Mexico/CMX-INMEGEN-03-09-84/2021  | EPI_ISL_1406133 | 17/02/2021 | Mexico City         | Human | Female | 68      | unknown      | Original | Oropharyngeal swab |
| hCoV-19/Mexico/CMX-INMEGEN-03-09-85/2021  | EPI_ISL_1406134 | 17/02/2021 | Mexico City         | Human | Female | 52      | unknown      | Original | Oropharyngeal swab |
| hCoV-19/Mexico/CMX-INER-INMEGEN-00042/202 | EPI_ISL_1424000 | 17/02/2021 | Mexico City         | Human | Female | 52      | unknown      | Original |                    |
| hCoV-19/Mexico/VER-InDRE_F10671_S817/2021 | EPI_ISL_1424019 | 17/02/2021 | Veracruz            | Human | Female | 62      | Released     | Original | Oropharyngeal swab |
| hCoV-19/Mexico/CMX-INER-SC480/2021        | EPI_ISL_1672849 | 17/02/2021 | Mexico City         | Human | Male   | 86      | Hospitalized | Original |                    |
| hCoV-19/Mexico/CMX-INER-INMEGEN-00092/202 | EPI_ISL_1824442 | 17/02/2021 | Mexico City         | Human | Male   | 57      | unknown      | Original |                    |
| hCoV-19/Mexico/CMX-INER-INMEGEN-00093/202 | EPI_ISL_1824443 | 17/02/2021 | Mexico City         | Human | Male   | 34      | unknown      | Original |                    |
| hCoV-19/Mexico/CMX-INER-INMEGEN-00094/202 | EPI_ISL_1824444 | 17/02/2021 | Mexico City         | Human | Female | 26      | unknown      | Original |                    |
| hCoV-19/Mexico/CMX-InDRE_F971_S613/2021   | EPI_ISL_1340629 | 17/02/2021 | Mexico City         | Human | Female | unknown | Released     | Original | Oropharyngeal swab |
| hCoV-19/Mexico/GUA-InDRE_F10349_S632/2021 | EPI_ISL_1340630 | 17/02/2021 | Guanajuato          | Human | Female | 44      | Hospitalized | Original | Oropharyngeal swab |
| hCoV-19/Mexico/GUA-InDRE_F10382_S641/2021 | EPI_ISL_1340631 | 17/02/2021 | Guanajuato          | Human | Male   | 39      | Released     | Original | Oropharyngeal swab |
| hCoV-19/Mexico/GUA-InDRE_F10387_S642/2021 | EPI_ISL_1340633 | 17/02/2021 | Guanajuato          | Human | Male   | 38      | Released     | Original | Oropharyngeal swab |
| hCoV-19/Mexico/MIC-InDRE_F10346_S853/2021 | EPI_ISL_1399259 | 17/02/2021 | Michoacan           | Human | Male   | 65      | Hospitalized | Original | Oropharyngeal swab |
| hCoV-19/Mexico/NLE-InDRE_F10510_S859/2021 | EPI_ISL_1399264 | 17/02/2021 | Nuevo Leon          | Human | Female | 41      | Released     | Original | Oropharyngeal swab |
| hCoV-19/Mexico/TAM-InDRE_F11055_S871/2021 | EPI_ISL_1399276 | 17/02/2021 | Tamaulipas          | Human | Female | 54      | Released     | Original | Oropharyngeal swab |
| hCoV-19/Mexico/CMX-INMEGEN-03-11-01/2021  | EPI_ISL_1591460 | 17/02/2021 | Mexico City         | Human | Female | 26      | unknown      | Original | Oropharyngeal swab |
| hCoV-19/Mexico/CMX-INMEGEN-03-11-09/2021  | EPI_ISL_1591468 | 17/02/2021 | Mexico City         | Human | Male   | 57      | unknown      | Original | Oropharyngeal swab |
| hCoV-19/Mexico/GUA-InDRE_F10383_S665/2021 | EPI_ISL_1359080 | 17/02/2021 | Guanajuato          | Human | Female | 56      | Released     | Original | Oropharyngeal swab |
| hCoV-19/Mexico/GUA-InDRE_F10384_S666/2021 | EPI_ISL_1359081 | 17/02/2021 | Guanajuato          | Human | Female | 28      | Released     | Original | Oropharyngeal swab |
| hCoV-19/Mexico/GUA-InDRE_F10385_S667/2021 | EPI_ISL_1359082 | 17/02/2021 | Guanajuato          | Human | Female | 60      | Released     | Original | Oropharyngeal swab |
| hCoV-19/Mexico/GUA-InDRE_F10386_S668/2021 | EPI_ISL_1359083 | 17/02/2021 | Guanajuato          | Human | Male   | 16      | Released     | Original | Oropharyngeal swab |
| hCoV-19/Mexico/GUA-InDRE_F10388_S669/2021 | EPI_ISL_1359084 | 17/02/2021 | Guanajuato          | Human | Male   | 52      | Released     | Original | Oropharyngeal swab |
| hCoV-19/Mexico/GUA-InDRE_F10389_S670/2021 | EPI_ISL_1359085 | 17/02/2021 | Guanajuato          | Human | Female | 55      | Released     | Original | Oropharyngeal swab |
| hCoV-19/Mexico/BCN-InDRE_F10696_S693/2021 | EPI_ISL_1365658 | 18/02/2021 | Baja California     | Human | Female | 30      | Released     | Original | Oropharyngeal swab |
| hCoV-19/Mexico/BCN-InDRE_F10697_S694/2021 | EPI_ISL_1365659 | 18/02/2021 | Baja California     | Human | Male   | 32      | Released     | Original | Oropharyngeal swab |
| hCoV-19/Mexico/BCN-InDRE_F10699_S695/2021 | EPI_ISL_1365660 | 18/02/2021 | Baja California     | Human | Female | 39      | Released     | Original | Oropharyngeal swab |
| hCoV-19/Mexico/CMX-INER-INMEGEN-00045/202 | EPI_ISL_1406759 | 18/02/2021 | Mexico City         | Human | Female | 45      | unknown      | Original |                    |
| hCoV-19/Mexico/CMX-INMEGEN-04-04-1/2021   | EPI_ISL_1628520 | 18/02/2021 | Mexico City         | Human | Male   | 66      | unknown      | Original | Oropharyngeal swab |
| hCoV-19/Mexico/CMX-INER-INMEGEN-00095/202 | EPI_ISL_1970842 | 18/02/2021 | Mexico City         | Human | Male   | 7       | unknown      | Original |                    |

|                                            |                 |            |                     |       |         |         |              |          |                     |
|--------------------------------------------|-----------------|------------|---------------------|-------|---------|---------|--------------|----------|---------------------|
| hCoV-19/Mexico/CMX-INER-INMEGEN-00096/202  | EPI_ISL_1970843 | 18/02/2021 | Mexico City         | Human | Female  | 12      | unknown      | Original |                     |
| hCoV-19/Mexico/CMX-INER-INMEGEN-00097/202  | EPI_ISL_1970844 | 18/02/2021 | Mexico City         | Human | Male    | 31      | unknown      | Original |                     |
| hCoV-19/Mexico/CMX-INER-INMEGEN-00098/202  | EPI_ISL_1970845 | 18/02/2021 | Mexico City         | Human | Female  | 64      | unknown      | Original |                     |
| hCoV-19/Mexico/CMX-INMEGEN-03-01-12/2021   | EPI_ISL_1168645 | 18/02/2021 | Mexico City         | Human | Female  | 49      | unknown      | Original | Oropharyngeal swab  |
| hCoV-19/Mexico/CMX-INMEGEN-03-01-17/2021   | EPI_ISL_1168646 | 18/02/2021 | Mexico City         | Human | Female  | 69      | unknown      | Original | Oropharyngeal swab  |
| hCoV-19/Mexico/CMX-INMEGEN-03-01-18/2021   | EPI_ISL_1168647 | 18/02/2021 | Mexico City         | Human | Male    | 13      | unknown      | Original | Oropharyngeal swab  |
| hCoV-19/Mexico/CMX-INMEGEN-03-01-21/2021   | EPI_ISL_1168650 | 18/02/2021 | Mexico City         | Human | Male    | 68      | unknown      | Original | Oropharyngeal swab  |
| hCoV-19/Mexico/CMX-INMEGEN-03-01-22/2021   | EPI_ISL_1168651 | 18/02/2021 | Mexico City         | Human | Male    | 53      | unknown      | Original | Oropharyngeal swab  |
| hCoV-19/Mexico/CMX-INMEGEN-03-01-23/2021   | EPI_ISL_1168652 | 18/02/2021 | Mexico City         | Human | Female  | 32      | unknown      | Original | Oropharyngeal swab  |
| hCoV-19/Mexico/CMX-INMEGEN-03-02-02/2021   | EPI_ISL_1181701 | 18/02/2021 | Mexico City         | Human | Male    | 54      | unknown      | Original | Oropharyngeal swab  |
| hCoV-19/Mexico/CMX-INMEGEN-03-02-05/2021   | EPI_ISL_1181703 | 18/02/2021 | Mexico City         | Human | Female  | 42      | unknown      | Original | Oropharyngeal swab  |
| hCoV-19/Mexico/CMX-INMEGEN-03-02-06/2021   | EPI_ISL_1181704 | 18/02/2021 | Mexico City         | Human | Female  | 41      | unknown      | Original | Oropharyngeal swab  |
| hCoV-19/Mexico/BCN-SEARCH-7475/2021        | EPI_ISL_1295760 | 18/02/2021 | Baja California     | Human | unknown | unknown | unknown      | Original | Nasal swab          |
| hCoV-19/Mexico/GUA-InDRE_F10350_S588/2021  | EPI_ISL_1337365 | 18/02/2021 | Guanajuato          | Human | Female  | 68      | Deceased     | Original | Oropharyngeal swab  |
| hCoV-19/Mexico/BCS-InDRE_F10688_S591/2021  | EPI_ISL_1337370 | 18/02/2021 | Baja California Sur | Human | Female  | 61      | Released     | Original | Oropharyngeal swab  |
| hCoV-19/Mexico/BCS-InDRE_F10702_S592/2021  | EPI_ISL_1337371 | 18/02/2021 | Baja California Sur | Human | Female  | 38      | Released     | Original | Oropharyngeal swab  |
| hCoV-19/Mexico/BCS-InDRE_F10703_S593/2021  | EPI_ISL_1337373 | 18/02/2021 | Baja California Sur | Human | Male    | 41      | Released     | Original | Oropharyngeal swab  |
| hCoV-19/Mexico/MOR-InDRE_F10653_S730/2021  | EPI_ISL_1366679 | 18/02/2021 | Morelos             | Human | Female  | 28      | Released     | Original | Oropharyngeal swab  |
| hCoV-19/Mexico/HID-InDRE_F10309_S807/2021  | EPI_ISL_1424009 | 18/02/2021 | Hidalgo             | Human | Male    | 84      | Deceased     | Original | Oropharyngeal swab  |
| hCoV-19/Mexico/QUE-InDRE_F10593_S814/2021  | EPI_ISL_1424016 | 18/02/2021 | Queretaro           | Human | Male    | 17      | Released     | Original | Oropharyngeal swab  |
| hCoV-19/Mexico/TAM-InDRE_F11058_S837/2021  | EPI_ISL_1424039 | 18/02/2021 | Tamaulipas          | Human | Female  | 31      | Released     | Original | Oropharyngeal swab  |
| hCoV-19/Mexico/CMX-INER-SC483/2021         | EPI_ISL_1672864 | 18/02/2021 | Mexico City         | Human | Male    | 62      | Hospitalized | Original | Nasopharyngeal swab |
| hCoV-19/Mexico/CMX-INER-SC486/2021         | EPI_ISL_1672865 | 18/02/2021 | Mexico City         | Human | Male    | 57      | Deceased     | Original | Nasopharyngeal swab |
| hCoV-19/Mexico/CMX-INER-INMEGEN-00099/202  | EPI_ISL_1824445 | 18/02/2021 | Mexico City         | Human | Male    | 29      | unknown      | Original |                     |
| hCoV-19/Mexico/CMX-INER-INMEGEN-00100/202  | EPI_ISL_1824446 | 18/02/2021 | Mexico City         | Human | Male    | 26      | unknown      | Original |                     |
| hCoV-19/Mexico/CMX-INER-INMEGEN-00101/202  | EPI_ISL_1824447 | 18/02/2021 | Mexico City         | Human | Female  | 55      | unknown      | Original |                     |
| hCoV-19/Mexico/CMX-INER-INMEGEN-00102/202  | EPI_ISL_1824448 | 18/02/2021 | Mexico City         | Human | Male    | 31      | unknown      | Original |                     |
| hCoV-19/Mexico/CMX-INER-INMEGEN-00103/202  | EPI_ISL_1824449 | 18/02/2021 | Mexico City         | Human | Female  | 39      | unknown      | Original |                     |
| hCoV-19/Mexico/CMX-INER-INMEGEN-00104/202  | EPI_ISL_1824450 | 18/02/2021 | Mexico City         | Human | Female  | 42      | unknown      | Original |                     |
| hCoV-19/Mexico/QUE-InDRE_F90B_S612/2021    | EPI_ISL_1340619 | 18/02/2021 | Queretaro           | Human | Female  | 51      | Deceased     | Original | Oropharyngeal swab  |
| hCoV-19/Mexico/CMX-InDRE_F115B_S615/2021   | EPI_ISL_1340620 | 18/02/2021 | Mexico City         | Human | Male    | 23      | Released     | Original | Oropharyngeal swab  |
| hCoV-19/Mexico/CMX-InDRE_F116B_S616/2021   | EPI_ISL_1340621 | 18/02/2021 | Mexico City         | Human | Male    | 54      | Released     | Original | Oropharyngeal swab  |
| hCoV-19/Mexico/CMX-InDRE_F117B_S617/2021   | EPI_ISL_1340623 | 18/02/2021 | Mexico City         | Human | Male    | 44      | Released     | Original | Oropharyngeal swab  |
| hCoV-19/Mexico/GUA-InDRE_F10348_S631/2021  | EPI_ISL_1340624 | 18/02/2021 | Guanajuato          | Human | Male    | 57      | Hospitalized | Original | Oropharyngeal swab  |
| hCoV-19/Mexico/GUA-InDRE_F10358_S635/2021  | EPI_ISL_1340626 | 18/02/2021 | Guanajuato          | Human | Female  | 33      | Released     | Original | Oropharyngeal swab  |
| hCoV-19/Mexico/GUA-InDRE_F10391_S643/2021  | EPI_ISL_1340627 | 18/02/2021 | Guanajuato          | Human | Female  | 65      | Released     | Original | Oropharyngeal swab  |
| hCoV-19/Mexico/GUA-InDRE_F10351_S854/2021  | EPI_ISL_1399260 | 18/02/2021 | Guanajuato          | Human | Male    | 77      | Hospitalized | Original | Oropharyngeal swab  |
| hCoV-19/Mexico/TAM-InDRE_F11057_S872/2021  | EPI_ISL_1399277 | 18/02/2021 | Tamaulipas          | Human | Male    | 41      | Released     | Original | Oropharyngeal swab  |
| hCoV-19/Mexico/JAL-InDRE-F11742-S1185/2021 | EPI_ISL_1558831 | 18/02/2021 | Jalisco             | Human | Female  | 45      | Released     | Original | Oropharyngeal swab  |
| hCoV-19/Mexico/CMX-INMEGEN-03-11-02/2021   | EPI_ISL_1591461 | 18/02/2021 | Mexico City         | Human | Male    | 59      | unknown      | Original | Oropharyngeal swab  |
| hCoV-19/Mexico/CMX-INMEGEN-03-11-10/2021   | EPI_ISL_1591469 | 18/02/2021 | Mexico City         | Human | Female  | 72      | unknown      | Original | Oropharyngeal swab  |

|                                           |                 |            |             |       |        |    |              |          |                     |
|-------------------------------------------|-----------------|------------|-------------|-------|--------|----|--------------|----------|---------------------|
| hCoV-19/Mexico/CMX-INMEGEN-03-11-18/2021  | EPI_ISL_1591477 | 18/02/2021 | Mexico City | Human | Female | 39 | unknown      | Original | Oropharyngeal swab  |
| hCoV-19/Mexico/CMX-INMEGEN-03-11-26/2021  | EPI_ISL_1591483 | 18/02/2021 | Mexico City | Human | Male   | 31 | unknown      | Original | Oropharyngeal swab  |
| hCoV-19/Mexico/GUA-InDRE_F10392_S671/2021 | EPI_ISL_1359086 | 18/02/2021 | Guanajuato  | Human | Male   | 43 | Released     | Original | Oropharyngeal swab  |
| hCoV-19/Mexico/GUA-InDRE_F10393_S672/2021 | EPI_ISL_1359087 | 18/02/2021 | Guanajuato  | Human | Male   | 21 | Released     | Original | Oropharyngeal swab  |
| hCoV-19/Mexico/CMX-INMEGEN-03-11-49/2021  | EPI_ISL_1591503 | 18/02/2021 | Mexico City | Human | Male   | 29 | unknown      | Original | Oropharyngeal swab  |
| hCoV-19/Mexico/CMX-INMEGEN-03-11-50/2021  | EPI_ISL_1591504 | 18/02/2021 | Mexico City | Human | Female | 60 | unknown      | Original | Oropharyngeal swab  |
| hCoV-19/Mexico/CMX-INMEGEN-03-11-57/2021  | EPI_ISL_1591511 | 18/02/2021 | Mexico City | Human | Female | 71 | unknown      | Original | Oropharyngeal swab  |
| hCoV-19/Mexico/CMX-INMEGEN-03-11-73/2021  | EPI_ISL_1591524 | 18/02/2021 | Mexico City | Human | Male   | 26 | unknown      | Original | Oropharyngeal swab  |
| hCoV-19/Mexico/CMX-INMEGEN-03-11-74/2021  | EPI_ISL_1591525 | 18/02/2021 | Mexico City | Human | Female | 42 | unknown      | Original | Oropharyngeal swab  |
| hCoV-19/Mexico/CMX-INMEGEN-03-11-81/2021  | EPI_ISL_1591530 | 18/02/2021 | Mexico City | Human | Male   | 55 | unknown      | Original | Oropharyngeal swab  |
| hCoV-19/Mexico/CMX-INMEGEN-03-11-82/2021  | EPI_ISL_1591531 | 18/02/2021 | Mexico City | Human | Male   | 26 | unknown      | Original | Oropharyngeal swab  |
| hCoV-19/Mexico/CMX-INMEGEN-03-11-87/2021  | EPI_ISL_1591536 | 18/02/2021 | Mexico City | Human | Male   | 23 | unknown      | Original | Oropharyngeal swab  |
| hCoV-19/Mexico/CMX-INMEGEN-03-11-89/2021  | EPI_ISL_1591537 | 18/02/2021 | Mexico City | Human | Female | 58 | unknown      | Original | Oropharyngeal swab  |
| hCoV-19/Mexico/MOR-InDRE_F10663_S690/2021 | EPI_ISL_1365655 | 19/02/2021 | Morelos     | Human | Male   | 71 | Released     | Original | Oropharyngeal swab  |
| hCoV-19/Mexico/COA-InDRE_F10752_S698/2021 | EPI_ISL_1365663 | 19/02/2021 | Coahuila    | Human | Male   | 28 | Released     | Original | Oropharyngeal swab  |
| hCoV-19/Mexico/CMX-INER-INMEGEN-00046/202 | EPI_ISL_1406760 | 19/02/2021 | Mexico City | Human | Female | 15 | unknown      | Original |                     |
| hCoV-19/Mexico/CMX-INER-INMEGEN-00047/202 | EPI_ISL_1406761 | 19/02/2021 | Mexico City | Human | Male   | 10 | unknown      | Original |                     |
| hCoV-19/Mexico/CMX-INER-INMEGEN-00048/202 | EPI_ISL_1406762 | 19/02/2021 | Mexico City | Human | Female | 18 | unknown      | Original |                     |
| hCoV-19/Mexico/CMX-INER-INMEGEN-00074/202 | EPI_ISL_1970838 | 19/02/2021 | Mexico City | Human | Female | 64 | unknown      | Original |                     |
| hCoV-19/Mexico/CMX-INMEGEN-03-01-19/2021  | EPI_ISL_1168648 | 19/02/2021 | Mexico City | Human | Male   | 30 | unknown      | Original | Oropharyngeal swab  |
| hCoV-19/Mexico/CMX-INMEGEN-03-01-20/2021  | EPI_ISL_1168649 | 19/02/2021 | Mexico City | Human | Female | 74 | unknown      | Original | Oropharyngeal swab  |
| hCoV-19/Mexico/CMX-INMEGEN-03-02-01/2021  | EPI_ISL_1181700 | 19/02/2021 | Mexico City | Human | Female | 49 | unknown      | Original | Oropharyngeal swab  |
| hCoV-19/Mexico/CMX-INMEGEN-03-02-04/2021  | EPI_ISL_1181702 | 19/02/2021 | Mexico City | Human | Female | 49 | unknown      | Original | Oropharyngeal swab  |
| hCoV-19/Mexico/CMX-INMEGEN-03-02-07/2021  | EPI_ISL_1181705 | 19/02/2021 | Mexico City | Human | Male   | 33 | unknown      | Original | Oropharyngeal swab  |
| hCoV-19/Mexico/CMX-INMEGEN-03-02-08/2021  | EPI_ISL_1181706 | 19/02/2021 | Mexico City | Human | Female | 60 | unknown      | Original | Oropharyngeal swab  |
| hCoV-19/Mexico/CMX-INMEGEN-03-02-13/2021  | EPI_ISL_1181710 | 19/02/2021 | Mexico City | Human | Female | 29 | unknown      | Original | Oropharyngeal swab  |
| hCoV-19/Mexico/CMX-INMEGEN-03-02-19/2021  | EPI_ISL_1181716 | 19/02/2021 | Mexico City | Human | Female | 40 | unknown      | Original | Oropharyngeal swab  |
| hCoV-19/Mexico/JAL-InDRE_F10438_S713/2021 | EPI_ISL_1366662 | 19/02/2021 | Jalisco     | Human | Female | 26 | Released     | Original | Oropharyngeal swab  |
| hCoV-19/Mexico/YUC-InDRE_F10540_S717/2021 | EPI_ISL_1366666 | 19/02/2021 | Yucatan     | Human | Female | 74 | Released     | Original | Oropharyngeal swab  |
| hCoV-19/Mexico/QUE-InDRE_F10598_S721/2021 | EPI_ISL_1366670 | 19/02/2021 | Queretaro   | Human | Female | 56 | Released     | Original | Oropharyngeal swab  |
| hCoV-19/Mexico/QUE-InDRE_F10599_S722/2021 | EPI_ISL_1366671 | 19/02/2021 | Queretaro   | Human | Male   | 58 | Released     | Original | Oropharyngeal swab  |
| hCoV-19/Mexico/MOR-InDRE_F10660_S732/2021 | EPI_ISL_1366681 | 19/02/2021 | Morelos     | Human | Male   | 17 | Released     | Original | Oropharyngeal swab  |
| hCoV-19/Mexico/VER-InDRE_F10672_S733/2021 | EPI_ISL_1366682 | 19/02/2021 | Veracruz    | Human | Female | 75 | Hospitalized | Original | Oropharyngeal swab  |
| hCoV-19/Mexico/CHP-InDRE_F10422_S811/2021 | EPI_ISL_1424013 | 19/02/2021 | Chiapas     | Human | Female | 63 | Hospitalized | Original | Oropharyngeal swab  |
| hCoV-19/Mexico/CAM-InDRE_F10557_S813/2021 | EPI_ISL_1424015 | 19/02/2021 | Campeche    | Human | Female | 49 | Hospitalized | Original | Oropharyngeal swab  |
| hCoV-19/Mexico/TAM-InDRE_F11059_S838/2021 | EPI_ISL_1424040 | 19/02/2021 | Tamaulipas  | Human | Male   | 36 | Released     | Original | Oropharyngeal swab  |
| hCoV-19/Mexico/VER-InDRE_F11084_S845/2021 | EPI_ISL_1424046 | 19/02/2021 | Veracruz    | Human | Female | 70 | Hospitalized | Original | Oropharyngeal swab  |
| hCoV-19/Mexico/CMX-INER-SC498/2021        | EPI_ISL_1672866 | 19/02/2021 | Mexico City | Human | Female | 67 | Hospitalized | Original | Nasopharyngeal swab |
| hCoV-19/Mexico/CMX-INER-INMEGEN-00065/202 | EPI_ISL_1824419 | 19/02/2021 | Mexico City | Human | Male   | 70 | unknown      | Original |                     |
| hCoV-19/Mexico/CMX-INER-INMEGEN-00066/202 | EPI_ISL_1824420 | 19/02/2021 | Mexico City | Human | Male   | 64 | unknown      | Original |                     |
| hCoV-19/Mexico/CMX-INER-INMEGEN-00067/202 | EPI_ISL_1824421 | 19/02/2021 | Mexico City | Human | Female | 62 | unknown      | Original |                     |

|                                                            |            |             |       |        |    |              |          |                    |
|------------------------------------------------------------|------------|-------------|-------|--------|----|--------------|----------|--------------------|
| hCoV-19/Mexico/CMX-INER-INMEGEN-00068/202 EPI_ISL_1824422  | 19/02/2021 | Mexico City | Human | Male   | 48 | unknown      | Original |                    |
| hCoV-19/Mexico/CMX-INER-INMEGEN-00069/202 EPI_ISL_1824423  | 19/02/2021 | Mexico City | Human | Male   | 37 | unknown      | Original |                    |
| hCoV-19/Mexico/CMX-INER-INMEGEN-00070/202 EPI_ISL_1824424  | 19/02/2021 | Mexico City | Human | Male   | 16 | unknown      | Original |                    |
| hCoV-19/Mexico/CMX-INER-INMEGEN-00071/202 EPI_ISL_1824425  | 19/02/2021 | Mexico City | Human | Female | 79 | unknown      | Original |                    |
| hCoV-19/Mexico/CMX-INER-INMEGEN-00072/202 EPI_ISL_1824426  | 19/02/2021 | Mexico City | Human | Female | 54 | unknown      | Original |                    |
| hCoV-19/Mexico/CMX-INER-INMEGEN-00073/202 EPI_ISL_1824427  | 19/02/2021 | Mexico City | Human | Female | 33 | unknown      | Original |                    |
| hCoV-19/Mexico/CMX-INER-INMEGEN-00075/202 EPI_ISL_1824428  | 19/02/2021 | Mexico City | Human | Female | 59 | unknown      | Original |                    |
| hCoV-19/Mexico/CMX-INER-INMEGEN-00076/202 EPI_ISL_1824429  | 19/02/2021 | Mexico City | Human | Male   | 73 | unknown      | Original |                    |
| hCoV-19/Mexico/GUA-InDRE_F84G_S609/2021 EPI_ISL_1340611    | 19/02/2021 | Guanajuato  | Human | Male   | 60 | Released     | Original | Oropharyngeal swab |
| hCoV-19/Mexico/CMX-InDRE_F95D_S614/2021 EPI_ISL_1340613    | 19/02/2021 | Mexico City | Human | Female | 53 | Released     | Original | Oropharyngeal swab |
| hCoV-19/Mexico/GUA-InDRE_F10357_S634/2021 EPI_ISL_1340614  | 19/02/2021 | Guanajuato  | Human | Male   | 29 | Released     | Original | Oropharyngeal swab |
| hCoV-19/Mexico/GUA-InDRE_F10367_S637/2021 EPI_ISL_1340616  | 19/02/2021 | Guanajuato  | Human | Female | 17 | Released     | Original | Oropharyngeal swab |
| hCoV-19/Mexico/GUA-InDRE_F10395_S644/2021 EPI_ISL_1340617  | 19/02/2021 | Guanajuato  | Human | Male   | 41 | Released     | Original | Oropharyngeal swab |
| hCoV-19/Mexico/PUE-InDRE_F10903_S765/2021 EPI_ISL_1400310  | 19/02/2021 | Puebla      | Human | Male   | 48 | Hospitalized | Original | Oropharyngeal swab |
| hCoV-19/Mexico/CMX-INMEGEN-03-11-34/2021 EPI_ISL_1591490   | 19/02/2021 | Mexico City | Human | Female | 50 | unknown      | Original | Oropharyngeal swab |
| hCoV-19/Mexico/CMX-INMEGEN-03-11-42/2021 EPI_ISL_1591496   | 19/02/2021 | Mexico City | Human | Male   | 50 | unknown      | Original | Oropharyngeal swab |
| hCoV-19/Mexico/CMX-INMEGEN-03-03-04/2021 EPI_ISL_1298454   | 19/02/2021 | Mexico City | Human | Female | 59 | unknown      | Original | Oropharyngeal swab |
| hCoV-19/Mexico/CMX-INMEGEN-03-03-21/2021 EPI_ISL_1298471   | 19/02/2021 | Mexico City | Human | Female | 24 | unknown      | Original | Oropharyngeal swab |
| hCoV-19/Mexico/GUA-InDRE_F10352_S655/2021 EPI_ISL_1359070  | 19/02/2021 | Guanajuato  | Human | Female | 72 | Hospitalized | Original | Oropharyngeal swab |
| hCoV-19/Mexico/GUA-InDRE_F10356_S656/2021 EPI_ISL_1359071  | 19/02/2021 | Guanajuato  | Human | Male   | 38 | Released     | Original | Oropharyngeal swab |
| hCoV-19/Mexico/GUA-InDRE_F10359_S657/2021 EPI_ISL_1359072  | 19/02/2021 | Guanajuato  | Human | Female | 35 | Released     | Original | Oropharyngeal swab |
| hCoV-19/Mexico/GUA-InDRE_F10360_S658/2021 EPI_ISL_1359073  | 19/02/2021 | Guanajuato  | Human | Female | 95 | Released     | Original | Oropharyngeal swab |
| hCoV-19/Mexico/GUA-InDRE_F10361_S659/2021 EPI_ISL_1359074  | 19/02/2021 | Guanajuato  | Human | Male   | 40 | Released     | Original | Oropharyngeal swab |
| hCoV-19/Mexico/SIN_CIAD_S6084/2021 EPI_ISL_1491363         | 19/02/2021 | Sinaloa     | Human | Female | 39 | unknown      | Original | Oropharyngeal swab |
| hCoV-19/Mexico/CMX-INMEGEN-03-11-58/2021 EPI_ISL_1591512   | 19/02/2021 | Mexico City | Human | Female | 19 | unknown      | Original | Oropharyngeal swab |
| hCoV-19/Mexico/CMX-INMEGEN-03-11-66/2021 EPI_ISL_1591519   | 19/02/2021 | Mexico City | Human | Female | 25 | unknown      | Original | Oropharyngeal swab |
| hCoV-19/Mexico/CMX-INMEGEN-03-02-14/2021 EPI_ISL_1181711   | 20/02/2021 | Mexico City | Human | Female | 20 | unknown      | Original | Oropharyngeal swab |
| hCoV-19/Mexico/CMX-INMEGEN-03-02-15/2021 EPI_ISL_1181712   | 20/02/2021 | Mexico City | Human | Male   | 56 | unknown      | Original | Oropharyngeal swab |
| hCoV-19/Mexico/CMX-INMEGEN-03-02-16/2021 EPI_ISL_1181713   | 20/02/2021 | Mexico City | Human | Male   | 42 | unknown      | Original | Oropharyngeal swab |
| hCoV-19/Mexico/CMX-INMEGEN-03-02-22/2021 EPI_ISL_1181719   | 20/02/2021 | Mexico City | Human | Male   | 21 | unknown      | Original | Oropharyngeal swab |
| hCoV-19/Mexico/QUE-InDRE_F10602_S723/2021 EPI_ISL_1366672  | 20/02/2021 | Queretaro   | Human | Male   | 38 | Released     | Original | Oropharyngeal swab |
| hCoV-19/Mexico/QUE-InDRE_F10603_S724/2021 EPI_ISL_1366673  | 20/02/2021 | Queretaro   | Human | Female | 49 | Released     | Original | Oropharyngeal swab |
| hCoV-19/Mexico/VER-InDRE_F10673_S734/2021 EPI_ISL_1366683  | 20/02/2021 | Veracruz    | Human | Male   | 45 | Released     | Original | Oropharyngeal swab |
| hCoV-19/Mexico/VER-InDRE_F10674_S735/2021 EPI_ISL_1366684  | 20/02/2021 | Veracruz    | Human | Female | 70 | Hospitalized | Original | Oropharyngeal swab |
| hCoV-19/Mexico/CMX-INER-INMEGEN-00049/202 EPI_ISL_1424001  | 20/02/2021 | Mexico City | Human | Female | 58 | unknown      | Original |                    |
| hCoV-19/Mexico/HID-InDRE_F10300_S806/2021 EPI_ISL_1424008  | 20/02/2021 | Hidalgo     | Human | Female | 48 | Released     | Original | Oropharyngeal swab |
| hCoV-19/Mexico/GUA-InDRE_F10353_S633/2021 EPI_ISL_1340608  | 20/02/2021 | Guanajuato  | Human | Male   | 51 | Hospitalized | Original | Oropharyngeal swab |
| hCoV-19/Mexico/GUA-InDRE_F10362_S636/2021 EPI_ISL_1340610  | 20/02/2021 | Guanajuato  | Human | Male   | 74 | Released     | Original | Oropharyngeal swab |
| hCoV-19/Mexico/GUA-InDRE_F10355_S856/2021 EPI_ISL_1399261  | 20/02/2021 | Guanajuato  | Human | Female | 60 | Hospitalized | Original | Oropharyngeal swab |
| hCoV-19/Mexico/VER-InDRE_F11086_S874/2021 EPI_ISL_1399279  | 20/02/2021 | Veracruz    | Human | Female | 38 | Released     | Original | Oropharyngeal swab |
| hCoV-19/Mexico/JAL-InDRE-F11741-S1184/2021 EPI_ISL_1558830 | 20/02/2021 | Jalisco     | Human | Female | 60 | Released     | Original | Oropharyngeal swab |

|                                           |                 |            |             |       |        |    |              |          |                    |
|-------------------------------------------|-----------------|------------|-------------|-------|--------|----|--------------|----------|--------------------|
| hCoV-19/Mexico/CMX-INMEGEN-03-03-01/2021  | EPI_ISL_1298451 | 20/02/2021 | Mexico City | Human | Female | 30 | unknown      | Original | Oropharyngeal swab |
| hCoV-19/Mexico/CMX-INMEGEN-03-03-02/2021  | EPI_ISL_1298452 | 20/02/2021 | Mexico City | Human | Male   | 65 | unknown      | Original | Oropharyngeal swab |
| hCoV-19/Mexico/CMX-INMEGEN-03-03-05/2021  | EPI_ISL_1298455 | 20/02/2021 | Mexico City | Human | Female | 16 | unknown      | Original | Oropharyngeal swab |
| hCoV-19/Mexico/CMX-INMEGEN-03-03-06/2021  | EPI_ISL_1298456 | 20/02/2021 | Mexico City | Human | Female | 69 | unknown      | Original | Oropharyngeal swab |
| hCoV-19/Mexico/CMX-INMEGEN-03-03-15/2021  | EPI_ISL_1298465 | 20/02/2021 | Mexico City | Human | Male   | 49 | unknown      | Original | Oropharyngeal swab |
| hCoV-19/Mexico/GUA-InDRE_F10364_S660/2021 | EPI_ISL_1359075 | 20/02/2021 | Guanajuato  | Human | Male   | 47 | Released     | Original | Oropharyngeal swab |
| hCoV-19/Mexico/GUA-InDRE_F10366_S661/2021 | EPI_ISL_1359076 | 20/02/2021 | Guanajuato  | Human | Female | 50 | Released     | Original | Oropharyngeal swab |
| hCoV-19/Mexico/CMX-INER-INMEGEN-00050/202 | EPI_ISL_1406763 | 21/02/2021 | Mexico City | Human | Female | 50 | unknown      | Original |                    |
| hCoV-19/Mexico/CMX-INER-INMEGEN-00051/202 | EPI_ISL_1406764 | 21/02/2021 | Mexico City | Human | Male   | 20 | unknown      | Original |                    |
| hCoV-19/Mexico/CMX-INMEGEN-03-02-17/2021  | EPI_ISL_1181714 | 21/02/2021 | Mexico City | Human | Female | 69 | unknown      | Original | Oropharyngeal swab |
| hCoV-19/Mexico/PUE-InDRE_F10413_S711/2021 | EPI_ISL_1366660 | 21/02/2021 | Puebla      | Human | Female | 28 | Released     | Original | Oropharyngeal swab |
| hCoV-19/Mexico/QUE-InDRE_F10607_S725/2021 | EPI_ISL_1366674 | 21/02/2021 | Queretaro   | Human | Female | 29 | Released     | Original | Oropharyngeal swab |
| hCoV-19/Mexico/QUE-InDRE_F10608_S726/2021 | EPI_ISL_1366675 | 21/02/2021 | Queretaro   | Human | Female | 36 | Hospitalized | Original | Oropharyngeal swab |
| hCoV-19/Mexico/VER-InDRE_F10681_S737/2021 | EPI_ISL_1366686 | 21/02/2021 | Veracruz    | Human | Female | 74 | Released     | Original | Oropharyngeal swab |
| hCoV-19/Mexico/JAL-InDRE_F10948_S752/2021 | EPI_ISL_1400298 | 21/02/2021 | Jalisco     | Human | Female | 66 | Hospitalized | Original | Oropharyngeal swab |
| hCoV-19/Mexico/GUA-InDRE_F10831_S795/2021 | EPI_ISL_1400340 | 21/02/2021 | Guanajuato  | Human | Female | 81 | Released     | Original | Oropharyngeal swab |
| hCoV-19/Mexico/YUC-InDRE_F10541_S812/2021 | EPI_ISL_1424014 | 21/02/2021 | Yucatan     | Human | Male   | 31 | Released     | Original | Oropharyngeal swab |
| hCoV-19/Mexico/MOR-InDRE_F10665_S816/2021 | EPI_ISL_1424018 | 21/02/2021 | Morelos     | Human | Male   | 44 | Hospitalized | Original | Oropharyngeal swab |
| hCoV-19/Mexico/MOR-InDRE_F10908_S864/2021 | EPI_ISL_1399269 | 21/02/2021 | Morelos     | Human | Male   | 64 | Hospitalized | Original | Oropharyngeal swab |
| hCoV-19/Mexico/JAL-InDRE_F10947_S865/2021 | EPI_ISL_1399270 | 21/02/2021 | Jalisco     | Human | Male   | 28 | Released     | Original | Oropharyngeal swab |
| hCoV-19/Mexico/MOR-InDRE_F10916_S763/2021 | EPI_ISL_1400309 | 21/02/2021 | Morelos     | Human | Female | 47 | Hospitalized | Original | Oropharyngeal swab |
| hCoV-19/Mexico/NLE-InDRE_F10799_S707/2021 | EPI_ISL_1365672 | 22/02/2021 | Nuevo Leon  | Human | Female | 50 | Released     | Original | Oropharyngeal swab |
| hCoV-19/Mexico/NLE-InDRE_F10802_S708/2021 | EPI_ISL_1365673 | 22/02/2021 | Nuevo Leon  | Human | Male   | 79 | Hospitalized | Original | Oropharyngeal swab |
| hCoV-19/Mexico/CMX-INER-INMEGEN-00052/202 | EPI_ISL_1406765 | 22/02/2021 | Mexico City | Human | Male   | 27 | unknown      | Original |                    |
| hCoV-19/Mexico/CMX-INER-INMEGEN-00053/202 | EPI_ISL_1406766 | 22/02/2021 | Mexico City | Human | Female | 20 | unknown      | Original |                    |
| hCoV-19/Mexico/CMX-INMEGEN-04-04-52/2021  | EPI_ISL_1628563 | 22/02/2021 | Mexico City | Human | Male   | 22 | unknown      | Original | Oropharyngeal swab |
| hCoV-19/Mexico/CMX-INMEGEN-03-02-18/2021  | EPI_ISL_1181715 | 22/02/2021 | Mexico City | Human | Male   | 52 | unknown      | Original | Oropharyngeal swab |
| hCoV-19/Mexico/CMX-INMEGEN-03-02-20/2021  | EPI_ISL_1181717 | 22/02/2021 | Mexico City | Human | Female | 27 | unknown      | Original | Oropharyngeal swab |
| hCoV-19/Mexico/CMX-INMEGEN-03-02-21/2021  | EPI_ISL_1181718 | 22/02/2021 | Mexico City | Human | Female | 21 | unknown      | Original | Oropharyngeal swab |
| hCoV-19/Mexico/GUA-InDRE_F10833_S574/2021 | EPI_ISL_1334386 | 22/02/2021 | Guanajuato  | Human | Female | 48 | Released     | Original | Oropharyngeal swab |
| hCoV-19/Mexico/HID-InDRE_F10781_S741/2021 | EPI_ISL_1366690 | 22/02/2021 | Hidalgo     | Human | Female | 50 | Deceased     | Original | Oropharyngeal swab |
| hCoV-19/Mexico/NLE-InDRE_F10792_S744/2021 | EPI_ISL_1366693 | 22/02/2021 | Nuevo Leon  | Human | Male   | 51 | Released     | Original | Oropharyngeal swab |
| hCoV-19/Mexico/NLE-InDRE_F10801_S748/2021 | EPI_ISL_1366697 | 22/02/2021 | Nuevo Leon  | Human | Female | 60 | Deceased     | Original | Oropharyngeal swab |
| hCoV-19/Mexico/GUA-InDRE_F10816_S751/2021 | EPI_ISL_1366700 | 22/02/2021 | Guanajuato  | Human | Male   | 65 | Hospitalized | Original | Oropharyngeal swab |
| hCoV-19/Mexico/CHH-InDRE_F11007_S878/2021 | EPI_ISL_1405905 | 22/02/2021 | Chihuahua   | Human | Female | 32 | Released     | Original | Oropharyngeal swab |
| hCoV-19/Mexico/GUA-InDRE_F10832_S893/2021 | EPI_ISL_1405914 | 22/02/2021 | Guanajuato  | Human | Male   | 51 | Released     | Original | Oropharyngeal swab |
| hCoV-19/Mexico/COA-InDRE_F11070_S842/2021 | EPI_ISL_1424044 | 22/02/2021 | Coahuila    | Human | Male   | 86 | Hospitalized | Original | Oropharyngeal swab |
| hCoV-19/Mexico/COA-InDRE_F11072_S843/2021 | EPI_ISL_1424045 | 22/02/2021 | Coahuila    | Human | Female | 53 | Hospitalized | Original | Oropharyngeal swab |
| hCoV-19/Mexico/CMX-INMEGEN-03-02-23/2021  | EPI_ISL_1193558 | 22/02/2021 | Mexico City | Human | Male   | 56 | unknown      | Original |                    |
| hCoV-19/Mexico/NLE-InDRE_F10803_S860/2021 | EPI_ISL_1399265 | 22/02/2021 | Nuevo Leon  | Human | Male   | 39 | Released     | Original | Oropharyngeal swab |
| hCoV-19/Mexico/NLE-InDRE_F10804_S861/2021 | EPI_ISL_1399266 | 22/02/2021 | Nuevo Leon  | Human | Female | 36 | Released     | Original | Oropharyngeal swab |



|                                           |                 |            |             |       |        |    |              |          |                    |
|-------------------------------------------|-----------------|------------|-------------|-------|--------|----|--------------|----------|--------------------|
| hCoV-19/Mexico/CHH-InDRE_F11009_S866/2021 | EPI_ISL_1399271 | 22/02/2021 | Chihuahua   | Human | Female | 18 | Released     | Original | Oropharyngeal swab |
| hCoV-19/Mexico/COA-InDRE_F11071_S873/2021 | EPI_ISL_1399278 | 22/02/2021 | Coahuila    | Human | Male   | 55 | Deceased     | Original | Oropharyngeal swab |
| hCoV-19/Mexico/MOR-InDRE_F10927_S759/2021 | EPI_ISL_1400305 | 22/02/2021 | Morelos     | Human | Male   | 46 | Hospitalized | Original | Oropharyngeal swab |
| hCoV-19/Mexico/MOR-InDRE_F10926_S760/2021 | EPI_ISL_1400306 | 22/02/2021 | Morelos     | Human | Female | 33 | Hospitalized | Original | Oropharyngeal swab |
| hCoV-19/Mexico/MOR-InDRE_F10922_S762/2021 | EPI_ISL_1400308 | 22/02/2021 | Morelos     | Human | Male   | 45 | Hospitalized | Original | Oropharyngeal swab |
| hCoV-19/Mexico/PUE-InDRE_F10901_S766/2021 | EPI_ISL_1400311 | 22/02/2021 | Puebla      | Human | Female | 36 | Released     | Original | Oropharyngeal swab |
| hCoV-19/Mexico/PUE-InDRE_F10895_S767/2021 | EPI_ISL_1400312 | 22/02/2021 | Puebla      | Human | Female | 86 | Deceased     | Original | Oropharyngeal swab |
| hCoV-19/Mexico/PUE-InDRE_F10894_S768/2021 | EPI_ISL_1400313 | 22/02/2021 | Puebla      | Human | Male   | 36 | Hospitalized | Original | Oropharyngeal swab |
| hCoV-19/Mexico/GUA-InDRE_F10854_S783/2021 | EPI_ISL_1400328 | 22/02/2021 | Guanajuato  | Human | Female | 57 | Released     | Original | Oropharyngeal swab |
| hCoV-19/Mexico/GUA-InDRE_F10846_S786/2021 | EPI_ISL_1400331 | 22/02/2021 | Guanajuato  | Human | Female | 60 | Released     | Original | Oropharyngeal swab |
| hCoV-19/Mexico/GUA-InDRE_F10835_S793/2021 | EPI_ISL_1400338 | 22/02/2021 | Guanajuato  | Human | Female | 53 | Released     | Original | Oropharyngeal swab |
| hCoV-19/Mexico/GUA-InDRE_F10834_S794/2021 | EPI_ISL_1400339 | 22/02/2021 | Guanajuato  | Human | Female | 70 | Released     | Original | Oropharyngeal swab |
| hCoV-19/Mexico/CMX-INMEGEN-03-11-03/2021  | EPI_ISL_1591462 | 22/02/2021 | Mexico City | Human | Male   | 21 | unknown      | Original | Oropharyngeal swab |
| hCoV-19/Mexico/CMX-INMEGEN-03-11-11/2021  | EPI_ISL_1591470 | 22/02/2021 | Mexico City | Human | Female | 47 | unknown      | Original | Oropharyngeal swab |
| hCoV-19/Mexico/CMX-INMEGEN-03-11-19/2021  | EPI_ISL_1591478 | 22/02/2021 | Mexico City | Human | Female | 41 | unknown      | Original | Oropharyngeal swab |
| hCoV-19/Mexico/CMX-INMEGEN-03-11-27/2021  | EPI_ISL_1591484 | 22/02/2021 | Mexico City | Human | Male   | 13 | unknown      | Original | Oropharyngeal swab |
| hCoV-19/Mexico/CMX-INMEGEN-03-11-32/2021  | EPI_ISL_1591489 | 22/02/2021 | Mexico City | Human | Male   | 52 | unknown      | Original | Oropharyngeal swab |
| hCoV-19/Mexico/CMX-INMEGEN-03-11-35/2021  | EPI_ISL_1591491 | 22/02/2021 | Mexico City | Human | Female | 43 | unknown      | Original | Oropharyngeal swab |
| hCoV-19/Mexico/CMX-INMEGEN-03-11-40/2021  | EPI_ISL_1591495 | 22/02/2021 | Mexico City | Human | Male   | 41 | unknown      | Original | Oropharyngeal swab |
| hCoV-19/Mexico/CMX-INMEGEN-03-03-07/2021  | EPI_ISL_1298457 | 22/02/2021 | Mexico City | Human | Male   | 29 | unknown      | Original | Oropharyngeal swab |
| hCoV-19/Mexico/CMX-INMEGEN-03-03-08/2021  | EPI_ISL_1298458 | 22/02/2021 | Mexico City | Human | Male   | 68 | unknown      | Original | Oropharyngeal swab |
| hCoV-19/Mexico/CMX-INMEGEN-03-03-09/2021  | EPI_ISL_1298459 | 22/02/2021 | Mexico City | Human | Male   | 41 | unknown      | Original | Oropharyngeal swab |
| hCoV-19/Mexico/CMX-INMEGEN-03-03-10/2021  | EPI_ISL_1298460 | 22/02/2021 | Mexico City | Human | Male   | 50 | unknown      | Original | Oropharyngeal swab |
| hCoV-19/Mexico/CMX-INMEGEN-03-03-11/2021  | EPI_ISL_1298461 | 22/02/2021 | Mexico City | Human | Male   | 12 | unknown      | Original | Oropharyngeal swab |
| hCoV-19/Mexico/CMX-INMEGEN-03-03-12/2021  | EPI_ISL_1298462 | 22/02/2021 | Mexico City | Human | Male   | 43 | unknown      | Original | Oropharyngeal swab |
| hCoV-19/Mexico/CMX-INMEGEN-03-03-13/2021  | EPI_ISL_1298463 | 22/02/2021 | Mexico City | Human | Female | 64 | unknown      | Original | Oropharyngeal swab |
| hCoV-19/Mexico/CMX-INMEGEN-03-03-14/2021  | EPI_ISL_1298464 | 22/02/2021 | Mexico City | Human | Female | 54 | unknown      | Original | Oropharyngeal swab |
| hCoV-19/Mexico/CMX-INMEGEN-03-03-16/2021  | EPI_ISL_1298466 | 22/02/2021 | Mexico City | Human | Female | 29 | unknown      | Original | Oropharyngeal swab |
| hCoV-19/Mexico/CMX-INMEGEN-03-03-18/2021  | EPI_ISL_1298468 | 22/02/2021 | Mexico City | Human | Female | 52 | unknown      | Original | Oropharyngeal swab |
| hCoV-19/Mexico/CMX-INMEGEN-03-03-22/2021  | EPI_ISL_1298472 | 22/02/2021 | Mexico City | Human | Female | 32 | unknown      | Original | Oropharyngeal swab |
| hCoV-19/Mexico/CMX-INMEGEN-03-05-16/2021  | EPI_ISL_1300425 | 22/02/2021 | Mexico City | Human | Female | 37 | unknown      | Original |                    |
| hCoV-19/Mexico/TAM-InDRE_F87L_S647/2021   | EPI_ISL_1359062 | 22/02/2021 | Tamaulipas  | Human | Male   | 57 | Released     | Original | Oropharyngeal swab |
| hCoV-19/Mexico/CMX-INMEGEN-03-11-59/2021  | EPI_ISL_1591513 | 22/02/2021 | Mexico City | Human | Male   | 36 | unknown      | Original | Oropharyngeal swab |
| hCoV-19/Mexico/BCN-InDRE_F10713_S697/2021 | EPI_ISL_1365662 | 23/02/2021 | Coahuila    | Human | Female | 61 | Released     | Original | Oropharyngeal swab |
| hCoV-19/Mexico/COA-InDRE_F10757_S699/2021 | EPI_ISL_1365664 | 23/02/2021 | Coahuila    | Human | Female | 61 | Released     | Original | Oropharyngeal swab |
| hCoV-19/Mexico/NLE-InDRE_F10791_S703/2021 | EPI_ISL_1365668 | 23/02/2021 | Nuevo Leon  | Human | Male   | 22 | Released     | Original | Oropharyngeal swab |
| hCoV-19/Mexico/NLE-InDRE_F10811_S709/2021 | EPI_ISL_1365674 | 23/02/2021 | Nuevo Leon  | Human | Male   | 37 | Released     | Original | Oropharyngeal swab |
| hCoV-19/Mexico/GUA-InDRE_F10817_S710/2021 | EPI_ISL_1365675 | 23/02/2021 | Guanajuato  | Human | Female | 58 | Hospitalized | Original | Oropharyngeal swab |
| hCoV-19/Mexico/CMX-INER-INMEGEN-00054/202 | EPI_ISL_1406767 | 23/02/2021 | Mexico City | Human | Male   | 46 | unknown      | Original |                    |
| hCoV-19/Mexico/CMX-INER-INMEGEN-00055/202 | EPI_ISL_1406768 | 23/02/2021 | Mexico City | Human | Male   | 56 | unknown      | Original |                    |
| hCoV-19/Mexico/CMX-INER-INMEGEN-00056/202 | EPI_ISL_1406769 | 23/02/2021 | Mexico City | Human | Female | 74 | unknown      | Original |                    |

|                                                           |            |             |       |        |    |              |          |                    |
|-----------------------------------------------------------|------------|-------------|-------|--------|----|--------------|----------|--------------------|
| hCoV-19/Mexico/CMX-INER-INMEGEN-00057/202 EPI_ISL_1406770 | 23/02/2021 | Mexico City | Human | Male   | 37 | unknown      | Original |                    |
| hCoV-19/Mexico/CMX-INER-INMEGEN-00058/202 EPI_ISL_1406771 | 23/02/2021 | Mexico City | Human | Female | 70 | unknown      | Original |                    |
| hCoV-19/Mexico/CMX-INER-INMEGEN-00059/202 EPI_ISL_1406772 | 23/02/2021 | Mexico City | Human | Female | 83 | unknown      | Original |                    |
| hCoV-19/Mexico/CMX-INER-INMEGEN-00060/202 EPI_ISL_1406773 | 23/02/2021 | Mexico City | Human | Male   | 59 | unknown      | Original |                    |
| hCoV-19/Mexico/CMX-INER-INMEGEN-00061/202 EPI_ISL_1406774 | 23/02/2021 | Mexico City | Human | Female | 50 | unknown      | Original |                    |
| hCoV-19/Mexico/GUA-InDRE_F10838_S601/2021 EPI_ISL_1337384 | 23/02/2021 | Guanajuato  | Human | Male   | 72 | Released     | Original | Oropharyngeal swab |
| hCoV-19/Mexico/QUE-InDRE_F10614_S727/2021 EPI_ISL_1366676 | 23/02/2021 | Queretaro   | Human | Male   | 34 | Released     | Original | Oropharyngeal swab |
| hCoV-19/Mexico/HID-InDRE_F10786_S742/2021 EPI_ISL_1366691 | 23/02/2021 | Hidalgo     | Human | Female | 55 | Released     | Original | Oropharyngeal swab |
| hCoV-19/Mexico/NLE-InDRE_F10793_S745/2021 EPI_ISL_1366694 | 23/02/2021 | Nuevo Leon  | Human | Female | 46 | Hospitalized | Original | Oropharyngeal swab |
| hCoV-19/Mexico/NLE-InDRE_F10800_S747/2021 EPI_ISL_1366696 | 23/02/2021 | Nuevo Leon  | Human | Male   | 66 | Released     | Original | Oropharyngeal swab |
| hCoV-19/Mexico/NLE-InDRE_F10807_S749/2021 EPI_ISL_1366698 | 23/02/2021 | Nuevo Leon  | Human | Male   | 52 | Released     | Original | Oropharyngeal swab |
| hCoV-19/Mexico/GUA-InDRE_F10821_S801/2021 EPI_ISL_1400346 | 23/02/2021 | Guanajuato  | Human | Female | 59 | Hospitalized | Original | Oropharyngeal swab |
| hCoV-19/Mexico/GUA-InDRE_F10844_S892/2021 EPI_ISL_1405912 | 23/02/2021 | Guanajuato  | Human | Male   | 57 | Released     | Original | Oropharyngeal swab |
| hCoV-19/Mexico/CHH-InDRE_F11012_S819/2021 EPI_ISL_1424021 | 23/02/2021 | Chiapas     | Human | Male   | 43 | Released     | Original | Oropharyngeal swab |
| hCoV-19/Mexico/TAM-InDRE_F11060_S839/2021 EPI_ISL_1424041 | 23/02/2021 | Tamaulipas  | Human | Male   | 64 | Released     | Original | Oropharyngeal swab |
| hCoV-19/Mexico/CMX-InDRE_F11120_S850/2021 EPI_ISL_1424051 | 23/02/2021 | Mexico City | Human | Female | 71 | Released     | Original | Oropharyngeal swab |
| hCoV-19/Mexico/CMX-INMEGEN-03-04-01/2021 EPI_ISL_1205203  | 23/02/2021 | Mexico City | Human | Male   | 81 | unknown      | Original | Oropharyngeal swab |
| hCoV-19/Mexico/CMX-INMEGEN-03-04-03/2021 EPI_ISL_1205205  | 23/02/2021 | Mexico City | Human | Male   | 19 | unknown      | Original | Oropharyngeal swab |
| hCoV-19/Mexico/CMX-INMEGEN-03-04-05/2021 EPI_ISL_1205207  | 23/02/2021 | Mexico City | Human | Female | 62 | unknown      | Original | Oropharyngeal swab |
| hCoV-19/Mexico/CMX-INMEGEN-03-04-06/2021 EPI_ISL_1205208  | 23/02/2021 | Mexico City | Human | Male   | 65 | unknown      | Original | Oropharyngeal swab |
| hCoV-19/Mexico/NLE-InDRE_F10806_S862/2021 EPI_ISL_1399267 | 23/02/2021 | Nuevo Leon  | Human | Male   | 74 | Hospitalized | Original | Oropharyngeal swab |
| hCoV-19/Mexico/NLE-InDRE_F10808_S863/2021 EPI_ISL_1399268 | 23/02/2021 | Nuevo Leon  | Human | Male   | 85 | Hospitalized | Original | Oropharyngeal swab |
| hCoV-19/Mexico/NAY-InDRE_F11035_S868/2021 EPI_ISL_1399273 | 23/02/2021 | Nayarit     | Human | Male   | 75 | Released     | Original | Oropharyngeal swab |
| hCoV-19/Mexico/GUA-InDRE_F10839_S758/2021 EPI_ISL_1400304 | 23/02/2021 | Guanajuato  | Human | Female | 17 | Released     | Original | Oropharyngeal swab |
| hCoV-19/Mexico/MOR-InDRE_F10923_S761/2021 EPI_ISL_1400307 | 23/02/2021 | Morelos     | Human | Male   | 31 | Released     | Original | Oropharyngeal swab |
| hCoV-19/Mexico/GUA-InDRE_F10855_S782/2021 EPI_ISL_1400327 | 23/02/2021 | Guanajuato  | Human | Female | 38 | Released     | Original | Oropharyngeal swab |
| hCoV-19/Mexico/GUA-InDRE_F10848_S784/2021 EPI_ISL_1400329 | 23/02/2021 | Guanajuato  | Human | Male   | 33 | Released     | Original | Oropharyngeal swab |
| hCoV-19/Mexico/GUA-InDRE_F10845_S787/2021 EPI_ISL_1400332 | 23/02/2021 | Guanajuato  | Human | Female | 42 | Released     | Original | Oropharyngeal swab |
| hCoV-19/Mexico/GUA-InDRE_F10841_S790/2021 EPI_ISL_1400335 | 23/02/2021 | Guanajuato  | Human | Female | 49 | Released     | Original | Oropharyngeal swab |
| hCoV-19/Mexico/GUA-InDRE_F10840_S791/2021 EPI_ISL_1400336 | 23/02/2021 | Guanajuato  | Human | Male   | 46 | Released     | Original | Oropharyngeal swab |
| hCoV-19/Mexico/GUA-InDRE_F10837_S792/2021 EPI_ISL_1400337 | 23/02/2021 | Guanajuato  | Human | Female | 18 | Released     | Original | Oropharyngeal swab |
| hCoV-19/Mexico/CMX-INMEGEN-03-03-17/2021 EPI_ISL_1298467  | 23/02/2021 | Mexico City | Human | Female | 59 | unknown      | Original | Oropharyngeal swab |
| hCoV-19/Mexico/CMX-INMEGEN-03-03-19/2021 EPI_ISL_1298469  | 23/02/2021 | Mexico City | Human | Male   | 6  | unknown      | Original | Oropharyngeal swab |
| hCoV-19/Mexico/CMX-INMEGEN-03-03-20/2021 EPI_ISL_1298470  | 23/02/2021 | Mexico City | Human | Female | 76 | unknown      | Original | Oropharyngeal swab |
| hCoV-19/Mexico/CMX-INMEGEN-03-11-51/2021 EPI_ISL_1591505  | 23/02/2021 | Mexico City | Human | Female | 39 | unknown      | Original | Oropharyngeal swab |
| hCoV-19/Mexico/COA-InDRE_F10759_S700/2021 EPI_ISL_1365665 | 24/02/2021 | Coahuila    | Human | Male   | 38 | Released     | Original | Oropharyngeal swab |
| hCoV-19/Mexico/NLE-InDRE_F10795_S704/2021 EPI_ISL_1365669 | 24/02/2021 | Nuevo Leon  | Human | Female | 24 | Released     | Original | Oropharyngeal swab |
| hCoV-19/Mexico/NLE-InDRE_F10796_S705/2021 EPI_ISL_1365670 | 24/02/2021 | Nuevo Leon  | Human | Female | 70 | Released     | Original | Oropharyngeal swab |
| hCoV-19/Mexico/NLE-InDRE_F10797_S706/2021 EPI_ISL_1365671 | 24/02/2021 | Nuevo Leon  | Human | Female | 22 | Released     | Original | Oropharyngeal swab |
| hCoV-19/Mexico/CMX-INER-INMEGEN-00001/202 EPI_ISL_1406722 | 24/02/2021 | Mexico City | Human | Male   | 10 | unknown      | Original |                    |
| hCoV-19/Mexico/CMX-INER-INMEGEN-00002/202 EPI_ISL_1406723 | 24/02/2021 | Mexico City | Human | Female | 69 | unknown      | Original |                    |

|                                           |                 |            |             |       |        |    |              |          |                    |
|-------------------------------------------|-----------------|------------|-------------|-------|--------|----|--------------|----------|--------------------|
| hCoV-19/Mexico/CMX-INER-INMEGEN-00003/202 | EPI_ISL_1406724 | 24/02/2021 | Mexico City | Human | Male   | 29 | unknown      | Original |                    |
| hCoV-19/Mexico/CMX-INER-INMEGEN-00062/202 | EPI_ISL_1406775 | 24/02/2021 | Mexico City | Human | Female | 21 | unknown      | Original |                    |
| hCoV-19/Mexico/CMX-INMEGEN-04-04-25/2021  | EPI_ISL_1628541 | 24/02/2021 | Mexico City | Human | Male   | 41 | unknown      | Original | Oropharyngeal swab |
| hCoV-19/Mexico/CMX-INMEGEN-04-04-33/2021  | EPI_ISL_1628548 | 24/02/2021 | Mexico City | Human | Male   | 43 | unknown      | Original | Oropharyngeal swab |
| hCoV-19/Mexico/CMX-INMEGEN-04-04-57/2021  | EPI_ISL_1628566 | 24/02/2021 | Mexico City | Human | Male   | 36 | unknown      | Original | Oropharyngeal swab |
| hCoV-19/Mexico/CMX-INMEGEN-03-05-01/2021  | EPI_ISL_1262702 | 24/02/2021 | Mexico City | Human | Female | 36 | unknown      | Original | Oropharyngeal swab |
| hCoV-19/Mexico/CMX-INMEGEN-03-05-02/2021  | EPI_ISL_1262703 | 24/02/2021 | Mexico City | Human | Female | 15 | unknown      | Original | Oropharyngeal swab |
| hCoV-19/Mexico/CMX-INMEGEN-03-05-03/2021  | EPI_ISL_1262704 | 24/02/2021 | Mexico City | Human | Male   | 58 | unknown      | Original | Oropharyngeal swab |
| hCoV-19/Mexico/CMX-INMEGEN-03-05-04/2021  | EPI_ISL_1262705 | 24/02/2021 | Mexico City | Human | Male   | 28 | unknown      | Original | Oropharyngeal swab |
| hCoV-19/Mexico/CMX-INMEGEN-03-05-05/2021  | EPI_ISL_1262706 | 24/02/2021 | Mexico City | Human | Male   | 45 | unknown      | Original | Oropharyngeal swab |
| hCoV-19/Mexico/CMX-INMEGEN-03-05-07/2021  | EPI_ISL_1262707 | 24/02/2021 | Mexico City | Human | Male   | 50 | unknown      | Original | Oropharyngeal swab |
| hCoV-19/Mexico/CMX-INMEGEN-03-05-08/2021  | EPI_ISL_1262708 | 24/02/2021 | Mexico City | Human | Male   | 64 | unknown      | Original | Oropharyngeal swab |
| hCoV-19/Mexico/CMX-INMEGEN-03-05-09/2021  | EPI_ISL_1262709 | 24/02/2021 | Mexico City | Human | Male   | 9  | unknown      | Original | Oropharyngeal swab |
| hCoV-19/Mexico/CMX-INMEGEN-03-05-10/2021  | EPI_ISL_1262710 | 24/02/2021 | Mexico City | Human | Female | 53 | unknown      | Original | Oropharyngeal swab |
| hCoV-19/Mexico/CMX-INMEGEN-03-05-12/2021  | EPI_ISL_1262711 | 24/02/2021 | Mexico City | Human | Female | 58 | unknown      | Original | Oropharyngeal swab |
| hCoV-19/Mexico/CMX-INMEGEN-03-05-13/2021  | EPI_ISL_1262712 | 24/02/2021 | Mexico City | Human | Female | 64 | unknown      | Original | Oropharyngeal swab |
| hCoV-19/Mexico/CMX-INMEGEN-03-05-14/2021  | EPI_ISL_1262713 | 24/02/2021 | Mexico City | Human | Male   | 34 | unknown      | Original | Oropharyngeal swab |
| hCoV-19/Mexico/CMX-INMEGEN-03-05-15/2021  | EPI_ISL_1262714 | 24/02/2021 | Mexico City | Human | Male   | 31 | unknown      | Original | Oropharyngeal swab |
| hCoV-19/Mexico/CMX-INMEGEN-03-05-18/2021  | EPI_ISL_1262715 | 24/02/2021 | Mexico City | Human | Male   | 35 | unknown      | Original | Oropharyngeal swab |
| hCoV-19/Mexico/CMX-INMEGEN-03-05-19/2021  | EPI_ISL_1262716 | 24/02/2021 | Mexico City | Human | Male   | 32 | unknown      | Original | Oropharyngeal swab |
| hCoV-19/Mexico/TAM-InDRE_F108L_S569/2021  | EPI_ISL_1334382 | 24/02/2021 | Tamaulipas  | Human | Male   | 46 | Released     | Original | Oropharyngeal swab |
| hCoV-19/Mexico/TAM-InDRE_F114L_S572/2021  | EPI_ISL_1334385 | 24/02/2021 | Tamaulipas  | Human | Male   | 44 | Released     | Original | Oropharyngeal swab |
| hCoV-19/Mexico/GUA-InDRE_F10853_S598/2021 | EPI_ISL_1337380 | 24/02/2021 | Guanajuato  | Human | Female | 39 | Released     | Original | Oropharyngeal swab |
| hCoV-19/Mexico/GUA-InDRE_F10852_S599/2021 | EPI_ISL_1337382 | 24/02/2021 | Guanajuato  | Human | Female | 22 | Released     | Original | Oropharyngeal swab |
| hCoV-19/Mexico/GUA-InDRE_F10851_S600/2021 | EPI_ISL_1337383 | 24/02/2021 | Guanajuato  | Human | Male   | 33 | Released     | Original | Oropharyngeal swab |
| hCoV-19/Mexico/GUA-InDRE_F10830_S602/2021 | EPI_ISL_1337386 | 24/02/2021 | Guanajuato  | Human | Male   | 55 | Deceased     | Original | Oropharyngeal swab |
| hCoV-19/Mexico/SIN-InDRE_F10813_S604/2021 | EPI_ISL_1337389 | 24/02/2021 | Sinaloa     | Human | Male   | 84 | Hospitalized | Original | Oropharyngeal swab |
| hCoV-19/Mexico/NLE-InDRE_F10794_S746/2021 | EPI_ISL_1366695 | 24/02/2021 | Nuevo Leon  | Human | Female | 36 | Released     | Original | Oropharyngeal swab |
| hCoV-19/Mexico/NLE-InDRE_F10809_S750/2021 | EPI_ISL_1366699 | 24/02/2021 | Nuevo Leon  | Human | Female | 52 | Released     | Original | Oropharyngeal swab |
| hCoV-19/Mexico/GUA-InDRE_F10820_S802/2021 | EPI_ISL_1400347 | 24/02/2021 | Guanajuato  | Human | Male   | 78 | Hospitalized | Original | Oropharyngeal swab |
| hCoV-19/Mexico/GUA-InDRE_F10858_S889/2021 | EPI_ISL_1405907 | 24/02/2021 | Guanajuato  | Human | Male   | 38 | Released     | Original | Oropharyngeal swab |
| hCoV-19/Mexico/GUA-InDRE_F10850_S890/2021 | EPI_ISL_1405909 | 24/02/2021 | Guanajuato  | Human | Female | 21 | Released     | Original | Oropharyngeal swab |
| hCoV-19/Mexico/GUA-InDRE_F10849_S891/2021 | EPI_ISL_1405910 | 24/02/2021 | Guanajuato  | Human | Female | 14 | Released     | Original | Oropharyngeal swab |
| hCoV-19/Mexico/JAL-InDRE_F10958_S880/2021 | EPI_ISL_1405911 | 24/02/2021 | Jalisco     | Human | Female | 64 | Released     | Original | Oropharyngeal swab |
| hCoV-19/Mexico/JAL-InDRE_F10954_S881/2021 | EPI_ISL_1405913 | 24/02/2021 | Jalisco     | Human | Female | 48 | Released     | Original | Oropharyngeal swab |
| hCoV-19/Mexico/MOR-InDRE_F10934_S818/2021 | EPI_ISL_1424020 | 24/02/2021 | Morelos     | Human | Male   | 53 | Released     | Original | Oropharyngeal swab |
| hCoV-19/Mexico/GRO-InDRE_F11063_S841/2021 | EPI_ISL_1424043 | 24/02/2021 | Guerrero    | Human | Male   | 67 | Deceased     | Original | Oropharyngeal swab |
| hCoV-19/Mexico/VER-InDRE_F11087_S846/2021 | EPI_ISL_1424047 | 24/02/2021 | Veracruz    | Human | Male   | 60 | Hospitalized | Original | Oropharyngeal swab |
| hCoV-19/Mexico/VER-InDRE_F11090_S847/2021 | EPI_ISL_1424048 | 24/02/2021 | Veracruz    | Human | Female | 71 | Released     | Original | Oropharyngeal swab |
| hCoV-19/Mexico/CMX-InDRE_F11123_S851/2021 | EPI_ISL_1424052 | 24/02/2021 | Mexico City | Human | Male   | 57 | Hospitalized | Original | Oropharyngeal swab |
| hCoV-19/Mexico/CMX-INMEGEN-03-04-02/2021  | EPI_ISL_1205204 | 24/02/2021 | Mexico City | Human | Female | 83 | unknown      | Original | Oropharyngeal swab |

|                                           |                 |            |             |       |        |    |              |          |                    |
|-------------------------------------------|-----------------|------------|-------------|-------|--------|----|--------------|----------|--------------------|
| hCoV-19/Mexico/CMX-INMEGEN-03-04-04/2021  | EPI_ISL_1205206 | 24/02/2021 | Mexico City | Human | Male   | 40 | unknown      | Original | Oropharyngeal swab |
| hCoV-19/Mexico/CMX-INMEGEN-03-05-11/2021  | EPI_ISL_1262642 | 24/02/2021 | Mexico City | Human | Male   | 30 | unknown      | Original | Oropharyngeal swab |
| hCoV-19/Mexico/MOR-InDRE_F10935_S755/2021 | EPI_ISL_1400301 | 24/02/2021 | Morelos     | Human | Male   | 58 | Released     | Original | Oropharyngeal swab |
| hCoV-19/Mexico/MOR-InDRE_F10933_S756/2021 | EPI_ISL_1400302 | 24/02/2021 | Morelos     | Human | Male   | 63 | Hospitalized | Original | Oropharyngeal swab |
| hCoV-19/Mexico/MOR-InDRE_F10930_S757/2021 | EPI_ISL_1400303 | 24/02/2021 | Morelos     | Human | Male   | 67 | Hospitalized | Original | Oropharyngeal swab |
| hCoV-19/Mexico/GUA-InDRE_F10857_S780/2021 | EPI_ISL_1400325 | 24/02/2021 | Guanajuato  | Human | Female | 38 | Released     | Original | Oropharyngeal swab |
| hCoV-19/Mexico/GUA-InDRE_F10856_S781/2021 | EPI_ISL_1400326 | 24/02/2021 | Guanajuato  | Human | Female | 19 | Released     | Original | Oropharyngeal swab |
| hCoV-19/Mexico/GUA-InDRE_F10843_S788/2021 | EPI_ISL_1400333 | 24/02/2021 | Guanajuato  | Human | Female | 31 | Released     | Original | Oropharyngeal swab |
| hCoV-19/Mexico/GUA-InDRE_F10842_S789/2021 | EPI_ISL_1400334 | 24/02/2021 | Guanajuato  | Human | Male   | 11 | Released     | Original | Oropharyngeal swab |
| hCoV-19/Mexico/CMX-INMEGEN-03-11-43/2021  | EPI_ISL_1591497 | 24/02/2021 | Mexico City | Human | Female | 44 | unknown      | Original | Oropharyngeal swab |
| hCoV-19/Mexico/CMX-INMEGEN-03-03-23/2021  | EPI_ISL_1298473 | 24/02/2021 | Mexico City | Human | Male   | 40 | unknown      | Original | Oropharyngeal swab |
| hCoV-19/Mexico/CMX-INMEGEN-03-08-15/2021  | EPI_ISL_1315492 | 24/02/2021 | Mexico City | Human | Male   | 47 | unknown      | Original | Oropharyngeal swab |
| hCoV-19/Mexico/CMX-INMEGEN-03-08-16/2021  | EPI_ISL_1315493 | 24/02/2021 | Mexico City | Human | Male   | 73 | unknown      | Original | Oropharyngeal swab |
| hCoV-19/Mexico/CMX-InDRE_F93B_S648/2021   | EPI_ISL_1359063 | 24/02/2021 | Mexico City | Human | Female | 72 | Released     | Original | Oropharyngeal swab |
| hCoV-19/Mexico/CMX-INMEGEN-03-08-01/2021  | EPI_ISL_1315479 | 25/02/2021 | Mexico City | Human | Female | 58 | unknown      | Original | Oropharyngeal swab |
| hCoV-19/Mexico/COA-InDRE_F10764_S701/2021 | EPI_ISL_1365666 | 25/02/2021 | Coahuila    | Human | Male   | 79 | Deceased     | Original | Oropharyngeal swab |
| hCoV-19/Mexico/CMX-INER-INMEGEN-00005/202 | EPI_ISL_1406725 | 25/02/2021 | Mexico City | Human | Female | 36 | unknown      | Original |                    |
| hCoV-19/Mexico/CMX-INER-INMEGEN-00006/202 | EPI_ISL_1406726 | 25/02/2021 | Mexico City | Human | Female | 35 | unknown      | Original |                    |
| hCoV-19/Mexico/CMX-INER-INMEGEN-00063/202 | EPI_ISL_1406776 | 25/02/2021 | Mexico City | Human | Female | 39 | unknown      | Original |                    |
| hCoV-19/Mexico/SIN-CIAD-HJ1154/2021       | EPI_ISL_1482628 | 25/02/2021 | Sinaloa     | Human | Female | 62 | unknown      | Original | Oropharyngeal swab |
| hCoV-19/Mexico/CMX-INMEGEN-04-04-2/2021   | EPI_ISL_1628521 | 25/02/2021 | Mexico City | Human | Male   | 53 | unknown      | Original | Oropharyngeal swab |
| hCoV-19/Mexico/CMX-INMEGEN-04-04-18/2021  | EPI_ISL_1628534 | 25/02/2021 | Mexico City | Human | Male   | 56 | unknown      | Original | Oropharyngeal swab |
| hCoV-19/Mexico/CMX-INMEGEN-04-04-34/2021  | EPI_ISL_1628549 | 25/02/2021 | Mexico City | Human | Male   | 13 | unknown      | Original | Oropharyngeal swab |
| hCoV-19/Mexico/CMX-INMEGEN-04-04-49/2021  | EPI_ISL_1628560 | 25/02/2021 | Mexico City | Human | Female | 22 | unknown      | Original | Oropharyngeal swab |
| hCoV-19/Mexico/CMX-INMEGEN-04-04-73/2021  | EPI_ISL_1628579 | 25/02/2021 | Mexico City | Human | Male   | 44 | unknown      | Original | Oropharyngeal swab |
| hCoV-19/Mexico/CMX-INMEGEN-04-04-89/2021  | EPI_ISL_1628590 | 25/02/2021 | Mexico City | Human | Male   | 45 | unknown      | Original | Oropharyngeal swab |
| hCoV-19/Mexico/CMX-INMEGEN-03-05-36/2021  | EPI_ISL_1262700 | 25/02/2021 | Mexico City | Human | Female | 84 | unknown      | Original | Oropharyngeal swab |
| hCoV-19/Mexico/CMX-INMEGEN-03-05-40/2021  | EPI_ISL_1262701 | 25/02/2021 | Mexico City | Human | Female | 46 | unknown      | Original | Oropharyngeal swab |
| hCoV-19/Mexico/CMX-INMEGEN-03-06-14/2021  | EPI_ISL_1265904 | 25/02/2021 | Mexico City | Human | Male   | 12 | unknown      | Original | Oropharyngeal swab |
| hCoV-19/Mexico/CMX-INMEGEN-03-06-15/2021  | EPI_ISL_1265905 | 25/02/2021 | Mexico City | Human | Male   | 48 | unknown      | Original | Oropharyngeal swab |
| hCoV-19/Mexico/CMX-INMEGEN-03-06-17/2021  | EPI_ISL_1265907 | 25/02/2021 | Mexico City | Human | Female | 58 | unknown      | Original | Oropharyngeal swab |
| hCoV-19/Mexico/CMX-INMEGEN-03-06-18/2021  | EPI_ISL_1265908 | 25/02/2021 | Mexico City | Human | Female | 35 | unknown      | Original | Oropharyngeal swab |
| hCoV-19/Mexico/GUA-InDRE_F10868_S595/2021 | EPI_ISL_1337376 | 25/02/2021 | Guanajuato  | Human | Female | 37 | Released     | Original | Oropharyngeal swab |
| hCoV-19/Mexico/GUA-InDRE_F10862_S596/2021 | EPI_ISL_1337377 | 25/02/2021 | Guanajuato  | Human | Female | 30 | Released     | Original | Oropharyngeal swab |
| hCoV-19/Mexico/GUA-InDRE_F10861_S597/2021 | EPI_ISL_1337379 | 25/02/2021 | Guanajuato  | Human | Female | 37 | Released     | Original | Oropharyngeal swab |
| hCoV-19/Mexico/GUA-InDRE_F10822_S603/2021 | EPI_ISL_1337387 | 25/02/2021 | Guanajuato  | Human | Female | 74 | Hospitalized | Original | Oropharyngeal swab |
| hCoV-19/Mexico/GUA-InDRE_F10827_S797/2021 | EPI_ISL_1400342 | 25/02/2021 | Guanajuato  | Human | Male   | 71 | Hospitalized | Original | Oropharyngeal swab |
| hCoV-19/Mexico/GUA-InDRE_F10825_S798/2021 | EPI_ISL_1400343 | 25/02/2021 | Guanajuato  | Human | Female | 87 | Deceased     | Original | Oropharyngeal swab |
| hCoV-19/Mexico/GUA-InDRE_F10824_S799/2021 | EPI_ISL_1400344 | 25/02/2021 | Guanajuato  | Human | Female | 55 | Deceased     | Original | Oropharyngeal swab |
| hCoV-19/Mexico/GUA-InDRE_F10823_S800/2021 | EPI_ISL_1400345 | 25/02/2021 | Guanajuato  | Human | Male   | 69 | Hospitalized | Original | Oropharyngeal swab |
| hCoV-19/Mexico/GUA-InDRE_F10819_S803/2021 | EPI_ISL_1400348 | 25/02/2021 | Guanajuato  | Human | Male   | 66 | Hospitalized | Original | Oropharyngeal swab |

|                                           |                 |            |                 |       |         |         |              |          |                    |
|-------------------------------------------|-----------------|------------|-----------------|-------|---------|---------|--------------|----------|--------------------|
| hCoV-19/Mexico/GUA-InDRE_F10818_S804/2021 | EPI_ISL_1400349 | 25/02/2021 | Guanajuato      | Human | Male    | 84      | Hospitalized | Original | Oropharyngeal swab |
| hCoV-19/Mexico/MOR-InDRE_F10942_S882/2021 | EPI_ISL_1405899 | 25/02/2021 | Morelos         | Human | Female  | 83      | Hospitalized | Original | Oropharyngeal swab |
| hCoV-19/Mexico/GUA-InDRE_F10866_S887/2021 | EPI_ISL_1405904 | 25/02/2021 | Guanajuato      | Human | Male    | 20      | Released     | Original | Oropharyngeal swab |
| hCoV-19/Mexico/GUA-InDRE_F10859_S888/2021 | EPI_ISL_1405906 | 25/02/2021 | Guanajuato      | Human | Female  | 38      | Released     | Original | Oropharyngeal swab |
| hCoV-19/Mexico/JAL-InDRE_F10959_S879/2021 | EPI_ISL_1405908 | 25/02/2021 | Jalisco         | Human | Male    | 72      | Released     | Original | Oropharyngeal swab |
| hCoV-19/Mexico/QUE-InDRE_F11013_S820/2021 | EPI_ISL_1424022 | 25/02/2021 | Queretaro       | Human | Female  | 53      | Hospitalized | Original | Oropharyngeal swab |
| hCoV-19/Mexico/QUE-InDRE_F11015_S821/2021 | EPI_ISL_1424023 | 25/02/2021 | Queretaro       | Human | Female  | 39      | Released     | Original | Oropharyngeal swab |
| hCoV-19/Mexico/QUE-InDRE_F11017_S823/2021 | EPI_ISL_1424025 | 25/02/2021 | Queretaro       | Human | Female  | 66      | Released     | Original | Oropharyngeal swab |
| hCoV-19/Mexico/QUE-InDRE_F11016_S830/2021 | EPI_ISL_1424032 | 25/02/2021 | Queretaro       | Human | Male    | 62      | Hospitalized | Original | Oropharyngeal swab |
| hCoV-19/Mexico/MOR-InDRE_F11061_S840/2021 | EPI_ISL_1424042 | 25/02/2021 | Morelos         | Human | Male    | 85      | Deceased     | Original | Oropharyngeal swab |
| hCoV-19/Mexico/VER-InDRE_F11093_S848/2021 | EPI_ISL_1424049 | 25/02/2021 | Veracruz        | Human | Female  | 50      | Released     | Original | Oropharyngeal swab |
| hCoV-19/Mexico/CMX-InDRE_F11124_S852/2021 | EPI_ISL_1424053 | 25/02/2021 | Mexico City     | Human | Male    | 48      | Hospitalized | Original | Oropharyngeal swab |
| hCoV-19/Mexico/CMX-INMEGEN-03-05-17/2021  | EPI_ISL_1262693 | 25/02/2021 | Mexico City     | Human | Male    | 62      | unknown      | Original | Oropharyngeal swab |
| hCoV-19/Mexico/CMX-INMEGEN-03-05-22/2021  | EPI_ISL_1262694 | 25/02/2021 | Mexico City     | Human | Male    | 20      | unknown      | Original | Oropharyngeal swab |
| hCoV-19/Mexico/CMX-INMEGEN-03-05-26/2021  | EPI_ISL_1262695 | 25/02/2021 | Mexico City     | Human | Male    | 65      | unknown      | Original | Oropharyngeal swab |
| hCoV-19/Mexico/CMX-INMEGEN-03-05-27/2021  | EPI_ISL_1262696 | 25/02/2021 | Mexico City     | Human | Female  | 39      | unknown      | Original | Oropharyngeal swab |
| hCoV-19/Mexico/CMX-INMEGEN-03-05-28/2021  | EPI_ISL_1262697 | 25/02/2021 | Mexico City     | Human | Male    | 41      | unknown      | Original | Oropharyngeal swab |
| hCoV-19/Mexico/CMX-INMEGEN-03-05-30/2021  | EPI_ISL_1262698 | 25/02/2021 | Mexico City     | Human | Male    | 19      | unknown      | Original | Oropharyngeal swab |
| hCoV-19/Mexico/CMX-INMEGEN-03-05-33/2021  | EPI_ISL_1262699 | 25/02/2021 | Mexico City     | Human | Male    | 49      | unknown      | Original | Oropharyngeal swab |
| hCoV-19/Mexico/NAY-InDRE_F11036_S869/2021 | EPI_ISL_1399274 | 25/02/2021 | Nayarit         | Human | Female  | 48      | Released     | Original | Oropharyngeal swab |
| hCoV-19/Mexico/GUA-InDRE_F10878_S770/2021 | EPI_ISL_1400315 | 25/02/2021 | Guanajuato      | Human | Female  | 58      | Released     | Original | Oropharyngeal swab |
| hCoV-19/Mexico/GUA-InDRE_F10877_S771/2021 | EPI_ISL_1400316 | 25/02/2021 | Guanajuato      | Human | Female  | 55      | Released     | Original | Oropharyngeal swab |
| hCoV-19/Mexico/GUA-InDRE_F10876_S772/2021 | EPI_ISL_1400317 | 25/02/2021 | Guanajuato      | Human | Male    | 60      | Released     | Original | Oropharyngeal swab |
| hCoV-19/Mexico/GUA-InDRE_F10869_S774/2021 | EPI_ISL_1400319 | 25/02/2021 | Guanajuato      | Human | Female  | 53      | Released     | Original | Oropharyngeal swab |
| hCoV-19/Mexico/GUA-InDRE_F10867_S775/2021 | EPI_ISL_1400320 | 25/02/2021 | Guanajuato      | Human | Female  | 29      | Released     | Original | Oropharyngeal swab |
| hCoV-19/Mexico/GUA-InDRE_F10865_S776/2021 | EPI_ISL_1400321 | 25/02/2021 | Guanajuato      | Human | Male    | 33      | Released     | Original | Oropharyngeal swab |
| hCoV-19/Mexico/GUA-InDRE_F10864_S777/2021 | EPI_ISL_1400322 | 25/02/2021 | Guanajuato      | Human | Female  | 60      | Released     | Original | Oropharyngeal swab |
| hCoV-19/Mexico/GUA-InDRE_F10863_S778/2021 | EPI_ISL_1400323 | 25/02/2021 | Guanajuato      | Human | Male    | 42      | Released     | Original | Oropharyngeal swab |
| hCoV-19/Mexico/GUA-InDRE_F10860_S779/2021 | EPI_ISL_1400324 | 25/02/2021 | Guanajuato      | Human | Female  | 61      | Released     | Original | Oropharyngeal swab |
| hCoV-19/Mexico/CMX-INER-INMEGEN-00004/202 | EPI_ISL_1423994 | 25/02/2021 | Mexico City     | Human | Female  | 10      | unknown      | Original |                    |
| hCoV-19/Mexico/CMX-INMEGEN-03-11-04/2021  | EPI_ISL_1591463 | 25/02/2021 | Mexico City     | Human | Male    | 13      | unknown      | Original | Oropharyngeal swab |
| hCoV-19/Mexico/COA-InDRE_F10766_S702/2021 | EPI_ISL_1365667 | 26/02/2021 | Coahuila        | Human | Female  | 67      | Released     | Original | Oropharyngeal swab |
| hCoV-19/Mexico/CMX-INER-INMEGEN-00011/202 | EPI_ISL_1406730 | 26/02/2021 | Mexico City     | Human | Male    | 62      | unknown      | Original |                    |
| hCoV-19/Mexico/CMX-INMEGEN-04-04-42/2021  | EPI_ISL_1628556 | 26/02/2021 | Mexico City     | Human | Female  | 56      | unknown      | Original | Oropharyngeal swab |
| hCoV-19/Mexico/CMX-INMEGEN-04-04-74/2021  | EPI_ISL_1628580 | 26/02/2021 | Mexico City     | Human | Female  | 60      | unknown      | Original | Oropharyngeal swab |
| hCoV-19/Mexico/CMX-INMEGEN-03-06-13/2021  | EPI_ISL_1265903 | 26/02/2021 | Mexico City     | Human | Female  | 47      | unknown      | Original | Oropharyngeal swab |
| hCoV-19/Mexico/CMX-INMEGEN-03-06-16/2021  | EPI_ISL_1265906 | 26/02/2021 | Mexico City     | Human | Male    | 41      | unknown      | Original | Oropharyngeal swab |
| hCoV-19/Mexico/BCN-SEARCH-7499/2021       | EPI_ISL_1295779 | 26/02/2021 | Baja California | Human | unknown | unknown | unknown      | Original | Nasal swab         |
| hCoV-19/Mexico/CAM-InDRE_F10946_S753/2021 | EPI_ISL_1400299 | 26/02/2021 | Campeche        | Human | Female  | 54      | Hospitalized | Original | Oropharyngeal swab |
| hCoV-19/Mexico/GUA-InDRE_F10881_S883/2021 | EPI_ISL_1405900 | 26/02/2021 | Guanajuato      | Human | Female  | 47      | Released     | Original | Oropharyngeal swab |
| hCoV-19/Mexico/GUA-InDRE_F10880_S884/2021 | EPI_ISL_1405901 | 26/02/2021 | Guanajuato      | Human | Male    | 48      | Released     | Original | Oropharyngeal swab |

|                                           |                 |            |                     |       |        |    |              |          |                    |
|-------------------------------------------|-----------------|------------|---------------------|-------|--------|----|--------------|----------|--------------------|
| hCoV-19/Mexico/GUA-InDRE_F10879_S885/2021 | EPI_ISL_1405902 | 26/02/2021 | Guanajuato          | Human | Female | 19 | Released     | Original | Oropharyngeal swab |
| hCoV-19/Mexico/GUA-InDRE_F10871_S886/2021 | EPI_ISL_1405903 | 26/02/2021 | Guanajuato          | Human | Female | 33 | Released     | Original | Oropharyngeal swab |
| hCoV-19/Mexico/GUA-InDRE_F10826_S894/2021 | EPI_ISL_1405915 | 26/02/2021 | Guanajuato          | Human | Male   | 66 | Hospitalized | Original | Oropharyngeal swab |
| hCoV-19/Mexico/QUE-InDRE_F11019_S824/2021 | EPI_ISL_1424026 | 26/02/2021 | Queretaro           | Human | Female | 36 | Released     | Original | Oropharyngeal swab |
| hCoV-19/Mexico/QUE-InDRE_F11020_S825/2021 | EPI_ISL_1424027 | 26/02/2021 | Queretaro           | Human | Male   | 43 | Released     | Original | Oropharyngeal swab |
| hCoV-19/Mexico/QUE-InDRE_F11022_S826/2021 | EPI_ISL_1424028 | 26/02/2021 | Queretaro           | Human | Female | 47 | Released     | Original | Oropharyngeal swab |
| hCoV-19/Mexico/QUE-InDRE_F11023_S827/2021 | EPI_ISL_1424029 | 26/02/2021 | Queretaro           | Human | Male   | 50 | Hospitalized | Original | Oropharyngeal swab |
| hCoV-19/Mexico/CMX-INMEGEN-04-04-66/2021  | EPI_ISL_1857295 | 26/02/2021 | Mexico City         | Human | Female | 59 | unknown      | Original | Oropharyngeal swab |
| hCoV-19/Mexico/CMX-INMEGEN-03-04-08/2021  | EPI_ISL_1205210 | 26/02/2021 | Mexico City         | Human | Female | 24 | unknown      | Original | Oropharyngeal swab |
| hCoV-19/Mexico/CMX-INMEGEN-03-04-09/2021  | EPI_ISL_1205211 | 26/02/2021 | Mexico City         | Human | Male   | 25 | unknown      | Original | Oropharyngeal swab |
| hCoV-19/Mexico/CMX-INMEGEN-03-04-10/2021  | EPI_ISL_1205212 | 26/02/2021 | Mexico City         | Human | Female | 38 | unknown      | Original | Oropharyngeal swab |
| hCoV-19/Mexico/CMX-INMEGEN-03-04-11/2021  | EPI_ISL_1205213 | 26/02/2021 | Mexico City         | Human | female | 41 | unknown      | Original | Oropharyngeal swab |
| hCoV-19/Mexico/CMX-INMEGEN-03-04-12/2021  | EPI_ISL_1205214 | 26/02/2021 | Mexico City         | Human | male   | 62 | unknown      | Original | Oropharyngeal swab |
| hCoV-19/Mexico/CMX-INMEGEN-03-05-43/2021  | EPI_ISL_1262631 | 26/02/2021 | Mexico City         | Human | Male   | 44 | unknown      | Original | Oropharyngeal swab |
| hCoV-19/Mexico/CMX-INMEGEN-03-05-37/2021  | EPI_ISL_1262638 | 26/02/2021 | Mexico City         | Human | Male   | 49 | unknown      | Original | Oropharyngeal swab |
| hCoV-19/Mexico/CMX-INMEGEN-03-05-35/2021  | EPI_ISL_1262686 | 26/02/2021 | Mexico City         | Human | Male   | 73 | unknown      | Original | Oropharyngeal swab |
| hCoV-19/Mexico/CMX-INMEGEN-03-05-38/2021  | EPI_ISL_1262687 | 26/02/2021 | Mexico City         | Human | Male   | 23 | unknown      | Original | Oropharyngeal swab |
| hCoV-19/Mexico/CMX-INMEGEN-03-05-41/2021  | EPI_ISL_1262688 | 26/02/2021 | Mexico City         | Human | Male   | 56 | unknown      | Original | Oropharyngeal swab |
| hCoV-19/Mexico/CMX-INMEGEN-03-05-47/2021  | EPI_ISL_1262689 | 26/02/2021 | Mexico City         | Human | Male   | 50 | unknown      | Original | Oropharyngeal swab |
| hCoV-19/Mexico/CMX-INMEGEN-03-05-48/2021  | EPI_ISL_1262690 | 26/02/2021 | Mexico City         | Human | Female | 30 | unknown      | Original | Oropharyngeal swab |
| hCoV-19/Mexico/CMX-INMEGEN-03-05-74/2021  | EPI_ISL_1262691 | 26/02/2021 | Mexico City         | Human | Male   | 53 | unknown      | Original | Oropharyngeal swab |
| hCoV-19/Mexico/CMX-INMEGEN-03-05-89/2021  | EPI_ISL_1262692 | 26/02/2021 | Mexico City         | Human | Male   | 56 | unknown      | Original | Oropharyngeal swab |
| hCoV-19/Mexico/CMX-InDRE_F11121_S877/2021 | EPI_ISL_1399281 | 26/02/2021 | Mexico City         | Human | Male   | 68 | Released     | Original | Oropharyngeal swab |
| hCoV-19/Mexico/MOR-InDRE_F10943_S754/2021 | EPI_ISL_1400300 | 26/02/2021 | Morelos             | Human | Male   | 71 | Released     | Original | Oropharyngeal swab |
| hCoV-19/Mexico/GUA-InDRE_F10870_S773/2021 | EPI_ISL_1400318 | 26/02/2021 | Guanajuato          | Human | Female | 30 | Released     | Original | Oropharyngeal swab |
| hCoV-19/Mexico/CMX-INER-INMEGEN-00007/202 | EPI_ISL_1423995 | 26/02/2021 | Mexico City         | Human | Male   | 12 | unknown      | Original |                    |
| hCoV-19/Mexico/CMX-INMEGEN-03-11-08/2021  | EPI_ISL_1591467 | 26/02/2021 | Mexico City         | Human | Female | 23 | unknown      | Original | Oropharyngeal swab |
| hCoV-19/Mexico/CMX-INMEGEN-03-11-12/2021  | EPI_ISL_1591471 | 26/02/2021 | Mexico City         | Human | Female | 31 | unknown      | Original | Oropharyngeal swab |
| hCoV-19/Mexico/CMX-INMEGEN-03-11-91/2021  | EPI_ISL_1591539 | 26/02/2021 | Mexico City         | Human | Female | 50 | unknown      | Original | Oropharyngeal swab |
| hCoV-19/Mexico/CMX-INMEGEN-03-08-10/2021  | EPI_ISL_1315487 | 26/02/2021 | Mexico City         | Human | Female | 24 | unknown      | Original | Oropharyngeal swab |
| hCoV-19/Mexico/CMX-INMEGEN-03-08-47/2021  | EPI_ISL_1315522 | 26/02/2021 | Mexico City         | Human | Female | 44 | unknown      | Original | Oropharyngeal swab |
| hCoV-19/Mexico/CMX-INMEGEN-03-11-83/2021  | EPI_ISL_1591532 | 26/02/2021 | Mexico City         | Human | Female | 48 | unknown      | Original | Oropharyngeal swab |
| hCoV-19/Mexico/CMX-INER-INMEGEN-00008/202 | EPI_ISL_1406727 | 27/02/2021 | Mexico City         | Human | Male   | 55 | unknown      | Original |                    |
| hCoV-19/Mexico/CMX-INER-INMEGEN-00010/202 | EPI_ISL_1406729 | 27/02/2021 | Mexico City         | Human | Female | 38 | unknown      | Original |                    |
| hCoV-19/Mexico/CMX-INER-INMEGEN-00012/202 | EPI_ISL_1406731 | 27/02/2021 | Mexico City         | Human | Male   | 68 | unknown      | Original |                    |
| hCoV-19/Mexico/CMX-INER-INMEGEN-00013/202 | EPI_ISL_1406732 | 27/02/2021 | Mexico City         | Human | Female | 30 | unknown      | Original |                    |
| hCoV-19/Mexico/CMX-INMEGEN-04-04-3/2021   | EPI_ISL_1628522 | 27/02/2021 | Mexico City         | Human | Female | 33 | unknown      | Original | Oropharyngeal swab |
| hCoV-19/Mexico/CMX-INMEGEN-04-04-90/2021  | EPI_ISL_1628591 | 27/02/2021 | Mexico City         | Human | Male   | 54 | unknown      | Original | Oropharyngeal swab |
| hCoV-19/Mexico/CMX-INMEGEN-03-06-12/2021  | EPI_ISL_1265902 | 27/02/2021 | Mexico City         | Human | Male   | 55 | unknown      | Original | Oropharyngeal swab |
| hCoV-19/Mexico/ROO-InDRE_F120Q_S584/2021  | EPI_ISL_1324767 | 27/02/2021 | Quintana Roo        | Human | Male   | 38 | Released     | Original | Oropharyngeal swab |
| hCoV-19/Mexico/BCS-InDRE_F11109_S606/2021 | EPI_ISL_1337392 | 27/02/2021 | Baja California Sur | Human | Male   | 48 | Released     | Original | Oropharyngeal swab |



|                                            |                 |            |                     |       |        |         |              |          |                    |
|--------------------------------------------|-----------------|------------|---------------------|-------|--------|---------|--------------|----------|--------------------|
| hCoV-19/Mexico/BCS-InDRE_F11116_S607/2021  | EPI_ISL_1337393 | 27/02/2021 | Baja California Sur | Human | Female | 31      | Released     | Original | Oropharyngeal swab |
| hCoV-19/Mexico/HID-InDRE_F10789_S743/2021  | EPI_ISL_1366692 | 27/02/2021 | Hidalgo             | Human | Male   | 47      | Released     | Original | Oropharyngeal swab |
| hCoV-19/Mexico/GUA-InDRE_F10829_S796/2021  | EPI_ISL_1400341 | 27/02/2021 | Guanajuato          | Human | Female | 66      | Hospitalized | Original | Oropharyngeal swab |
| hCoV-19/Mexico/QUE-InDRE_F11024_S828/2021  | EPI_ISL_1424030 | 27/02/2021 | Queretaro           | Human | Male   | 49      | Released     | Original | Oropharyngeal swab |
| hCoV-19/Mexico/QUE-InDRE_F11025_S829/2021  | EPI_ISL_1424031 | 27/02/2021 | Queretaro           | Human | Female | 20      | Released     | Original | Oropharyngeal swab |
| hCoV-19/Mexico/CMX-INMEGEN-03-04-13/2021   | EPI_ISL_1205215 | 27/02/2021 | Mexico City         | Human | female | 38      | unknown      | Original | Oropharyngeal swab |
| hCoV-19/Mexico/CMX-INMEGEN-03-04-14/2021   | EPI_ISL_1205216 | 27/02/2021 | Mexico City         | Human | male   | 68      | unknown      | Original | Oropharyngeal swab |
| hCoV-19/Mexico/CMX-INMEGEN-03-04-15/2021   | EPI_ISL_1205217 | 27/02/2021 | Mexico City         | Human | male   | 11      | unknown      | Original | Oropharyngeal swab |
| hCoV-19/Mexico/CMX-INMEGEN-03-05-39/2021   | EPI_ISL_1262682 | 27/02/2021 | Mexico City         | Human | Male   | 44      | unknown      | Original | Oropharyngeal swab |
| hCoV-19/Mexico/CMX-INMEGEN-03-05-49/2021   | EPI_ISL_1262683 | 27/02/2021 | Mexico City         | Human | Male   | 47      | unknown      | Original | Oropharyngeal swab |
| hCoV-19/Mexico/CMX-INMEGEN-03-05-51/2021   | EPI_ISL_1262684 | 27/02/2021 | Mexico City         | Human | Female | 43      | unknown      | Original | Oropharyngeal swab |
| hCoV-19/Mexico/CMX-INMEGEN-03-05-52/2021   | EPI_ISL_1262685 | 27/02/2021 | Mexico City         | Human | Male   | 36      | unknown      | Original | Oropharyngeal swab |
| hCoV-19/Mexico/CMX-INMEGEN-03-05-50/2021   | EPI_ISL_1310811 | 27/02/2021 | Mexico City         | Human | Male   | 22      | unknown      | Original |                    |
| hCoV-19/Mexico/GUA-InDRE_F10882_S769/2021  | EPI_ISL_1400314 | 27/02/2021 | Guanajuato          | Human | Female | 27      | Released     | Original | Oropharyngeal swab |
| hCoV-19/Mexico/GUA-InDRE_F10847_S785/2021  | EPI_ISL_1400330 | 27/02/2021 | Guanajuato          | Human | Female | 57      | Released     | Original | Oropharyngeal swab |
| hCoV-19/Mexico/CMX-INMEGEN-03-11-16/2021   | EPI_ISL_1591475 | 27/02/2021 | Mexico City         | Human | Female | 29      | unknown      | Original | Oropharyngeal swab |
| hCoV-19/Mexico/CMX-INER-INMEGEN-00009/202  | EPI_ISL_1406728 | 28/02/2021 | Mexico City         | Human | Male   | 13      | unknown      | Original |                    |
| hCoV-19/Mexico/QUE-InDRE_F11027_S822/2021  | EPI_ISL_1424024 | 28/02/2021 | Queretaro           | Human | Female | 78      | Released     | Original | Oropharyngeal swab |
| hCoV-19/Mexico/QUE-InDRE_F11028_S831/2021  | EPI_ISL_1424033 | 28/02/2021 | Queretaro           | Human | Female | 25      | Released     | Original | Oropharyngeal swab |
| hCoV-19/Mexico/BCN-InDRE_F11110_S849/2021  | EPI_ISL_1424050 | 28/02/2021 | Baja California     | Human | Male   | 27      | Released     | Original | Oropharyngeal swab |
| hCoV-19/Mexico/CMX-INMEGEN-03-04-16/2021   | EPI_ISL_1205218 | 28/02/2021 | Mexico City         | Human | female | 33      | unknown      | Original | Oropharyngeal swab |
| hCoV-19/Mexico/CMX-INMEGEN-03-05-69/2021   | EPI_ISL_1262680 | 28/02/2021 | Mexico City         | Human | Female | 55      | unknown      | Original | Oropharyngeal swab |
| hCoV-19/Mexico/CMX-INMEGEN-03-05-72/2021   | EPI_ISL_1262681 | 28/02/2021 | Mexico City         | Human | Male   | 28      | unknown      | Original | Oropharyngeal swab |
| hCoV-19/Mexico/JAL-InDRE-F11737-S1182/2021 | EPI_ISL_1558828 | 28/02/2021 | Jalisco             | Human | Female | unknown | Released     | Original | Oropharyngeal swab |
| hCoV-19/Mexico/JAL-InDRE-F11738-S1183/2021 | EPI_ISL_1558829 | 28/02/2021 | Jalisco             | Human | Male   | 45      | Released     | Original | Oropharyngeal swab |
