# Supplementary material for: Genetic Analysis of SARS-CoV-2 Variants in Mexico during the First Year of the COVID-19 Pandemic
Source: MDPI journal article supplement (doi:10.3390/v13112161), 2021-10-26
Supplement: s1 [file s1]

We gratefully acknowledge the following Authors from the Originating laboratories responsible for obtaining the specimens, as well as the Submitting laboratories where the genome data were generated and shared via GISAID, on which this research is based.

All Submitters of data may be contacted directly via [www.gisaid.org](http://www.gisaid.org)

Authors are sorted alphabetically.

| Accession ID                                                                        |  | Originating Laboratory                                                                                                                                                 | Submitting Laboratory                                                                                                                                                                                                                                                                                                                                                    | Authors                                                                                                                                                                                                                                                                                                                                                                                                                                                                                                                                                                                 |
|-------------------------------------------------------------------------------------|--|------------------------------------------------------------------------------------------------------------------------------------------------------------------------|--------------------------------------------------------------------------------------------------------------------------------------------------------------------------------------------------------------------------------------------------------------------------------------------------------------------------------------------------------------------------|-----------------------------------------------------------------------------------------------------------------------------------------------------------------------------------------------------------------------------------------------------------------------------------------------------------------------------------------------------------------------------------------------------------------------------------------------------------------------------------------------------------------------------------------------------------------------------------------|
| EPI_ISL_699656, EPI_ISL_699657                                                      |  | 1-Laboratory of Microbiology, National Reference Lab, Charles Nicolle Hospital; 2- University of Tunis ElManar, Faculty of Medicine of Tunis, LR99ES09, Tunis, Tunisia | 1-Clinical and Experimental Pharmacology Lab, LR16SP02, National Center of Pharmacovigilance, University of Tunis El Manar, Tunis, Tunisia. 2-Neurodegenerative diseases and psychiatric troubles, LR18SP03, Razi Hospital, University of Tunis El Manar, Tunis, Tunisia. 3- Ministry of Health, National Observatory of New and Emerging Diseases, 1006, Tunis, Tunisia | Alia Ben Kahla; Asma Ferjani; Gaies Emna; Guedi Berrabeh; Hanen ElJebari; Ilhem Boutiba-Ben Boubaker; Jalila Ben Khelil; Maher Kharrat; Mouna Ben Sassi; Mouna Safer; Nissaf Ben Alaya; Riadh Daghfous; Riadh Gouider.; Salma Abid; Salwa Mrabet; Sameh Trabelsi; Sana Ferjani                                                                                                                                                                                                                                                                                                          |
| EPI_ISL_467432                                                                      |  | AMPATH-DBN                                                                                                                                                             | KRISP, KZN Research Innovation and Sequencing Platform                                                                                                                                                                                                                                                                                                                   | Chimukangara B; Glandhari J; Khan S; Lessells R; Mdlalose K; Pillay S; Tegally H; Wilkinson E; York D; de Oliveira T                                                                                                                                                                                                                                                                                                                                                                                                                                                                    |
| EPI_ISL_542187                                                                      |  | ASST GOM Niguarda                                                                                                                                                      | Dep. Of Oncology and Hemato-Oncology University of Milan                                                                                                                                                                                                                                                                                                                 | Antonio Piralla; Carlo Federico Perno; Chiara Vismara; Claudia Alteri; Elisa Matarazzo; Fausto Baldanti; Federica Giardina; Federica Novazzi; Luna Colagrossi; Maria Antonello; Massimo Puoti; Monica Tallarita; Oscar Massimiliano Epis; Roberto Fumagalli; Silvia Renica; Stefano Gaiarsa; Valentino Costabile; Valeria Cento                                                                                                                                                                                                                                                         |
| EPI_ISL_694552                                                                      |  | AZ SPHL, Arizona Department of Health Services                                                                                                                         | TGen North                                                                                                                                                                                                                                                                                                                                                               | Ashlyn Pfeiffer; Chris French; Darrin Lemmer; Dave Engelthaler; Hayley Yaglom; Jolene Bowers; Megan Folkerts; The Arizona COVID Genomics Union (ACGU)                                                                                                                                                                                                                                                                                                                                                                                                                                   |
| EPI_ISL_528937                                                                      |  | Agenzia di Tutela della Salute di Bergamo                                                                                                                              | Istituto Zooprofilattico Sperimentale dell'Abruzzo e Molise "G.Caporale"                                                                                                                                                                                                                                                                                                 | Ancora M; Cammà C; Curini V; Di Domenico M; Di Pasquale A; Lorusso A; Mangone I; Marcacci M; Puglia I; Rinaldi A; Savini G.                                                                                                                                                                                                                                                                                                                                                                                                                                                             |
| EPI_ISL_549091                                                                      |  | Akershus University Hospital, Department for Microbiology and Infectious Disease Control                                                                               | Norwegian Institute of Public Health, Department of Virology                                                                                                                                                                                                                                                                                                             | Hilde Elshaug; Hilde Synnøve Vollan; Kamilla Heddeland Instefjord; Karoline Bragstad; Kathrine Stene-Johansen; Olav Hungnes; Rasmus Riis Kopperud                                                                                                                                                                                                                                                                                                                                                                                                                                       |
| EPI_ISL_509688                                                                      |  | Alabama Department of Public Health Bureau of Clinical Laboratories                                                                                                    | Pathogen Discovery, Respiratory Viruses Branch, Division of Viral Diseases, Centers for Disease Control and Prevention                                                                                                                                                                                                                                                   | Anna Uehara; Clinton Paden; Haibin Wang; Jing Zhang; Krista Queen; Suxiang Tong; Yan Li; Ying Tao                                                                                                                                                                                                                                                                                                                                                                                                                                                                                       |
| EPI_ISL_528713                                                                      |  | Alsafer - Khalifa University Abu Dhabi                                                                                                                                 | Alsafer - Khalifa University Abu Dhabi                                                                                                                                                                                                                                                                                                                                   | Andreas Henschel; Ernesto Damiani; Gihan Daw Elbait; Guan Tay; Habiba Alsafer; Rifat Hamoudi; Samuel Feng                                                                                                                                                                                                                                                                                                                                                                                                                                                                               |
| EPI_ISL_527740                                                                      |  | Area De Salud Alajuela Norte - Clinica Dr. Marcial Rodriguez                                                                                                           | Incinsa, Instituto Costarricense de Investigación y Enseñanza en Nutrición y Salud                                                                                                                                                                                                                                                                                       | Adriana Godínez & Melany Calderon; Claudio Soto-Garita; Estela Cordero; Francisco Duarte; Hebleen Porras                                                                                                                                                                                                                                                                                                                                                                                                                                                                                |
| EPI_ISL_500639, EPI_ISL_500677, EPI_ISL_509505                                      |  | Area of Virology, Serology and Virology Division (SAVID), New South Wales Health Pathology Randwick                                                                    | Area of Virology, Serology and Virology Division (SAVID), New South Wales Health Pathology Randwick                                                                                                                                                                                                                                                                      | Rawlinson, W.                                                                                                                                                                                                                                                                                                                                                                                                                                                                                                                                                                           |
| EPI_ISL_475831, EPI_ISL_475835, EPI_ISL_475866                                      |  | Austrian Agency for Health and Food Safety (AGES)                                                                                                                      | Bergthaler laboratory, CeMM Research Center for Molecular Medicine of the Austrian Academy of Sciences                                                                                                                                                                                                                                                                   | Alexander Lercher; Alexandra Popa; Andreas Bergthaler; Benedikt Agerer; Christoph Bock; Daniela Schmid; Dorothee von Laer; Elisabeth Puchhammer-Stoeckl; Franz Allerberger; Gregor Hörmann; Guenter Weiss; Henrique Colaco; Jakob-Wendelin Genger; Jan Laine; Judith Aberle; Kinga Rigler-Hohenwarter; Lukas Endler; Manfred Nairz; Mark Smyth; Martin Senekowitsch; Michael Schuster; Peter Hufnagl; Rainer Gatringer; Stephan Aberle; Thomas Penz; Wegene Borena                                                                                                                      |
| EPI_ISL_461492                                                                      |  | B.J. Medical College and Civil hospital                                                                                                                                | Gujarat Biotechnology Research Centre                                                                                                                                                                                                                                                                                                                                    | ; A M Kadri; Ankit Hinsu; Apurvasinh Puvar; Chaitanya Joshi; Dinesh Kumar; Harsh Bakshi; Janvi Raval; Kamlesh J Upadhyay; Komal Patel; Labdhi Pandya; Madhvi Joshi; Maharshi Pandya; Monika Gandhi; Neelam Nathani; Nidhi Patel; Nitin Savaliya; Pinal Trivedi; Pranay Shah; Pritesh Sabara; R D Dixit; Raghawendra Kumar; Snehal Bagatharia; Tejas Shah; Zarna Patel; Zuber Saiyed                                                                                                                                                                                                     |
| EPI_ISL_450344                                                                      |  | Bangladesh Institute of Tropical & Infectious Diseases, COVID-19 Testing Laboratory                                                                                    | Basic and Applied Research on Jute Project                                                                                                                                                                                                                                                                                                                               | A S M Anwarul Huq; AMAM Zonae Siddiki; Eaftekhar Ahmed Rana; Emdadul Mannan Emdad; Goutam Buddha Das; M A Hassan Chowdhury; Md. Monjurul Alam; Md. Nazmul Haq Rony; Md. Sabbir Hossain; Md. Samiul Haque; Md. Shahidul Islam; Md. Shakeel Ahmed; Md. Sharifur Rahman; Paritous Kumar Biswas; Rasel Ahmed; Shah Md Tamim Kabir                                                                                                                                                                                                                                                           |
| EPI_ISL_444022                                                                      |  | Baylor College of Medicine                                                                                                                                             | Baylor College of Medicine: HGSC                                                                                                                                                                                                                                                                                                                                         | David Henke; Donna Muzny; Erin Nicholson; George Weissenberger; Ginger Metcalf; Harsha Doddapaneni; Hsu Chao; Hua Shen; Joseph F. Petrosino; Kavya Kottapalli; Kristi L. Hoffman; Matthew C. Ross; Matthew Wong; Pedro Piedra; Qingchang Meng; Richard Scugang; Sara J.J. Cregeen; Sejal Salvi; Tulin Ayvaz; Vasanthi Avadhanula; Vipin Menon; Yimiti Meiheerguli; Zeineen Momin                                                                                                                                                                                                        |
| EPI_ISL_529213                                                                      |  | Beijing Institute of Microbiology and Epidemiology                                                                                                                     | Beijing Institute of Microbiology and Epidemiology                                                                                                                                                                                                                                                                                                                       | Cui, Y.; Fan; Guo, Y.; Hang; Hou, J.; Li, B.; Mi, Z.; Mu, J.; Qin, E.; Song; Teng; Wu, Y.; Xu, Z.; Yajun.; Yang, R.; Yong, Y.; Yue; Zhang, X.                                                                                                                                                                                                                                                                                                                                                                                                                                           |
| EPI_ISL_755232                                                                      |  | Biolab Diagnostic Laboratories                                                                                                                                         | Andersen lab at Scripps Research                                                                                                                                                                                                                                                                                                                                         | Ahmad Tibi; Amid Abdelnour with SEARCH Alliance San Diego; Issa Abu-Dayyeh; Lama Hussein; Lina Mohammad; Zein Naber                                                                                                                                                                                                                                                                                                                                                                                                                                                                     |
| EPI_ISL_1040927, EPI_ISL_1672849, EPI_ISL_1672864, EPI_ISL_1672865, EPI_ISL_1672866 |  | Biología molecular de enfermedades emergentes y EPOC, Instituto Nacional de Enfermedades Respiratorias                                                                 | Biología molecular de enfermedades emergentes y EPOC, Instituto Nacional de Enfermedades Respiratorias                                                                                                                                                                                                                                                                   | ; Eduardo Becerril-Vargas; Hernández-Teran Alejandra; José Arturo Martínez-Orozco; Mario Mújica-Sánchez; Mejía-Nepomuceno Fidencio; Perez-Padilla Rogelio; Ramirez-Gonzalez Ernesto.; Rodríguez-Maldonado Abril; Salas-Hernández Jorge; Serna Ricardo; Vazquez-Perez Joel Armando; Wong-Aramblua Claudia                                                                                                                                                                                                                                                                                |
| EPI_ISL_511479                                                                      |  | CH Porto - H Sto Antonio                                                                                                                                               | Instituto Nacional de Saude (INSA)                                                                                                                                                                                                                                                                                                                                       | Borges et al                                                                                                                                                                                                                                                                                                                                                                                                                                                                                                                                                                            |
| EPI_ISL_454237                                                                      |  | CHLO                                                                                                                                                                   | Instituto Nacional de Saude (INSA)                                                                                                                                                                                                                                                                                                                                       | Borges et al                                                                                                                                                                                                                                                                                                                                                                                                                                                                                                                                                                            |
| EPI_ISL_418222                                                                      |  | CHRU Bretonneau - Serv. Bacterio-Virol.                                                                                                                                | National Reference Center for Viruses of Respiratory Infections, Institut Pasteur, Paris                                                                                                                                                                                                                                                                                 | Angela Brisebarre; Etienne Simon-Lorière; Fabiana Gambaro; Flora Donati; Julien Marlet; Marion Barbet; Maud Vanpeene; Mélanie Albert; Méline Bizard; Sylvie Behillili; Sylvie van der Werf; Vincent Enouf                                                                                                                                                                                                                                                                                                                                                                               |
| EPI_ISL_443266                                                                      |  | CHU - Hôpital Cavale Blanche - Labo. de Virologie                                                                                                                      | National Reference Center for Viruses of Respiratory Infections, Institut Pasteur, Paris                                                                                                                                                                                                                                                                                 | Angela Brisebarre; Etienne Simon-Lorière; Flora Donati; Léa Pilorge; Marion Barbet; Maud Vanpeene; Mélanie Albert; Méline Bizard; Sylvie Behillili; Sylvie van der Werf; Vincent Enouf                                                                                                                                                                                                                                                                                                                                                                                                  |
| EPI_ISL_644683                                                                      |  | CHU Montpellier                                                                                                                                                        | CNR Virus des Infections Respiratoires - France SUD                                                                                                                                                                                                                                                                                                                      | Antonin Bal; Bruno Lina; Gregory Destras; Gwendolyne Burfin; Hadrien Règue; Laurence Josset; Martine Valette; Michel Segondy; Quentin Semanas; Vincent Foulongne                                                                                                                                                                                                                                                                                                                                                                                                                        |
| EPI_ISL_645217, EPI_ISL_666722                                                      |  | CHU Nantes                                                                                                                                                             | CNR Virus des Infections Respiratoires - France SUD                                                                                                                                                                                                                                                                                                                      | Antonin Bal; Bruno Lina; Céline Bressollette; Gregory Destras; Gwendolyne Burfin; Hadrien Règue; Laurence Josset; Louise Castain; Martine Valette; Quentin Semanas; Virginie Ferré                                                                                                                                                                                                                                                                                                                                                                                                      |
| EPI_ISL_660712                                                                      |  | CHU Nimes                                                                                                                                                              | CNR Virus des Infections Respiratoires - France SUD                                                                                                                                                                                                                                                                                                                      | Antonin Bal; Bruno Lina; Gregory Destras; Gwendolyne Burfin; Hadrien Règue; Jean-Philippe Lavigne; Laurence Josset; Marie-Josée Carles; Martine Valette; Maxence Lotellier; Quentin Semanas; Stephan Robin                                                                                                                                                                                                                                                                                                                                                                              |
| EPI_ISL_413648                                                                      |  | CHU Sao Joao, Porto                                                                                                                                                    | Instituto Nacional de Saude (INSA)                                                                                                                                                                                                                                                                                                                                       | Inês Costa; Joana Isidro; Joana Mendonça; João Paulo Gomes; João Tiago Guimarães; Luís Vieira; Pedro Pechirra; Raquel Guilomar; Vitor Borges                                                                                                                                                                                                                                                                                                                                                                                                                                            |
| EPI_ISL_641552                                                                      |  | CHU Toulouse                                                                                                                                                           | CNR Virus des Infections Respiratoires - France SUD                                                                                                                                                                                                                                                                                                                      | Antonin Bal; Bruno Lina; Gregory Destras; Gwendolyne Burfin; Hadrien Règue; Jean Michel Mansuy; Laurence Josset; Martine Valette; Quentin Semanas                                                                                                                                                                                                                                                                                                                                                                                                                                       |
| EPI_ISL_535736, EPI_ISL_535741                                                      |  | CHUL-LABO MULTI / MICRO                                                                                                                                                | Laboratoire de santé publique du Québec                                                                                                                                                                                                                                                                                                                                  | Guillaume Bourque; Ioannis Ragoussis; Jesse Shapiro; Mark Lathrop and Michel Roger; Sandrine Moreira                                                                                                                                                                                                                                                                                                                                                                                                                                                                                    |
| EPI_ISL_1219714                                                                     |  | CICSaB/UASLP/LESP SLP                                                                                                                                                  | Instituto de Diagnostico y Referencia Epidemiologicos (INDRE)                                                                                                                                                                                                                                                                                                            | Abril Rodriguez-Maldonado; Andreu Comas-Garcia; Ariadna Medina-Benitez; Claudia Wong-Aramblua; David Fragoso-Fonseca; Ernesto Ramirez-Gonzalez.; Gisela Barrera-Badillo; Irma Lopez-Martinez; Joaquin Quiroz-Mercado; Lucia Hernandez-Rivas; Natividad Cruz-Ortiz; Sergio Rangel-Guerrero; Tatiana Nunez-Garcia; Vanessa Rivero-Arredondo                                                                                                                                                                                                                                               |
| EPI_ISL_412981                                                                      |  | CR&WISCO GENERAL HOSPITAL                                                                                                                                              | Hubei Provincial Center for Disease Control and Prevention                                                                                                                                                                                                                                                                                                               | Bin Fang; Bo Yang; Bo Yu; Faxian Zhan; Guojun Ye; Jing Li; Junqiang Xu; Kun Cai; Linlin Liu; Xiang Li; Xiao Yu; Xixiang Huo; Yongzhong Jiang.                                                                                                                                                                                                                                                                                                                                                                                                                                           |
| EPI_ISL_418235                                                                      |  | Cabinet médical                                                                                                                                                        | National Reference Center for Viruses of Respiratory Infections, Institut Pasteur, Paris                                                                                                                                                                                                                                                                                 | Angela Brisebarre; Etienne Simon-Lorière; Flora Donati; Marion Barbet; Maud Vanpeene; Mélanie Albert; Méline Bizard; Sylvie Behillili; Sylvie van der Werf; Vincent Enouf                                                                                                                                                                                                                                                                                                                                                                                                               |
| EPI_ISL_582321, EPI_ISL_582494                                                      |  | Cadham Provincial Laboratory                                                                                                                                           | National Microbiology Laboratory (NML)                                                                                                                                                                                                                                                                                                                                   | Anna Majer; Anneliese Landgraff; CanCOGen's metadata curation team; Darian Hole; David Alexander; Elsie Grudski; Gary Van Domselaar; Grace Seo; Jared Bullard; Jennifer Tanner; Kerry Dust; Madison Chapel; Morag Graham; Natalie Knox; Nathalie Bastien; Paul Van Caesele; Philip Mabon; Public Health Agency of Canada CanCOGen team; Rhianon Huzarewicz; Russell Mandes; Shari Tyson; Timothy Booth; Yan Li                                                                                                                                                                          |
| EPI_ISL_579092                                                                      |  | Canterbury Health Laboratories                                                                                                                                         | Institute of Environmental Science and Research (ESR)                                                                                                                                                                                                                                                                                                                    | Anja Werno; Antje van der Linden; Arlo Upton; Chris Mansell; David Hamner; Dragana Drinkovic; Erasmus Smit; Gary McAuliffe; Hana Sofia Andersson; Hermes Perez; James Ussher; Jill Sherwood; Jing Wang; Joep de Ligt; Josh Freeman; Julia Howard; Juliet Elvy; Lauren Jelly; Mary DeAlmeida; Matt Blakiston; Matt Storey; Matthew Rogers; Max Bloomfield; Michelle Balm; Muhammad Faisal; Nikki Freed; Olin Silander; Sally Roberts; Sarah Jefferies; Sharmini Muttaiyah; Susan Morpeth; Susan Taylor; Timothy Blackmore; Vani Sathyendran; Veronica Playle; Virginia Hope; Xiaoyun Ren |
| EPI_ISL_475618, EPI_ISL_475663, EPI_ISL_475675, EPI_ISL_475680, EPI_ISL_475688      |  | Cedars-Sinai Medical Center, Department of Pathology & Laboratory Medicine, Molecular Pathology Laboratory                                                             | Cedars-Sinai Medical Center, Molecular Pathology Laboratory of Department of Pathology & Laboratory Medicine and Genomic Core                                                                                                                                                                                                                                            | Brian Davis; Eric Vail; Jasmine T Plummer; Jean Lopategui; Jianbo Song; John Paul Govindavari; Jong Taek Kim; Stephanie Chen; Wenjuan Zhang                                                                                                                                                                                                                                                                                                                                                                                                                                             |
| EPI_ISL_522461, EPI_ISL_522468                                                      |  | Center for Laboratory Control of Infectious Diseases, Korea Centers for Diseases Control and Prevention                                                                | Center for Laboratory Control of Infectious Diseases, Korea Centers for Diseases Control and Prevention                                                                                                                                                                                                                                                                  | Ae Kyung Park; Eunkyung Shin; Heui Man Kim; Jeong-Min Kim; Jin Sun No; Junyoung Kim; Myung Guk Han; Yoon-Seok Chung                                                                                                                                                                                                                                                                                                                                                                                                                                                                     |
| EPI_ISL_419672                                                                      |  | Center for Virology, Medical University of Vienna                                                                                                                      | Bergthaler laboratory, CeMM Research Center for Molecular Medicine of the Austrian Academy of Sciences                                                                                                                                                                                                                                                                   | Alexander Lercher; Alexandra Popa; Andreas Bergthaler; Benedikt Agerer; Christoph Bock; Elisabeth Puchhammer-Stöckl; Henrique Colaco; Jakob-Wendelin Genger; Judith Aberle; Lukas Endler; Mark Smyth; Michael Schuster; Stephan Aberle; Thomas Penz                                                                                                                                                                                                                                                                                                                                     |
| EPI_ISL_414497                                                                      |  | Center of Medical Microbiology, Virology, and Hospital Hygiene, University of Duesseldorf                                                                              | Center of Medical Microbiology, Virology, and Hospital Hygiene, University of Duesseldorf                                                                                                                                                                                                                                                                                | Alexander Dilthey; Andreas Walker; Björn-Erik Jensen; Daniel Strelow; Detlef Kindgen-Milles; Jörg Timm; Klaus Pfeffer; Malte Kohns Vasconcelos; Marcel Andree; Ortwin Adams; Sandra Hauka; Tina Senff; Tobias Wienemann; Torsten Feldt; Torsten Houwaart                                                                                                                                                                                                                                                                                                                                |
| EPI_ISL_418228                                                                      |  | Centre Hospitalier Compiegne Laboratoire de Biologie                                                                                                                   | National Reference Center for Viruses of Respiratory Infections, Institut Pasteur, Paris                                                                                                                                                                                                                                                                                 | Angela Brisebarre; Etienne Simon-Lorière; Flora Donati; Marion Barbet; Maud Vanpeene; Mélanie Albert; Méline Bizard; Raulin Olivia; Sylvie Behillili; Sylvie van der Werf; Vincent Enouf                                                                                                                                                                                                                                                                                                                                                                                                |
| EPI_ISL_416749                                                                      |  | Centre Hospitalier de Valence                                                                                                                                          | CNR Virus des Infections Respiratoires - France SUD                                                                                                                                                                                                                                                                                                                      | Alexandre; Antonin; Bal; Bouscambert-Duchamp; Brengel-Pesce; Bruno.; Cheynet; Destras; Florence; Gaymard; Gregory; Josset; Karen; Laurence; Lina; Martine; Maude; Morfin-Sherpa; Valette; Valérie                                                                                                                                                                                                                                                                                                                                                                                       |
| EPI_ISL_418412                                                                      |  | Centre Hospitalier des Vals d'Ardeche                                                                                                                                  | CNR Virus des Infections Respiratoires - France SUD                                                                                                                                                                                                                                                                                                                      | Alexandre Gaymard; Antonin Bal; Bruno Lina; Carine Moustaud; Florence Morfin-Sherpa; Gregory Destras; Gwendolyne Burfin; Laurence Josset; Martine Valette; Maude Bouscambert-Duchamp; Raphaëlle Lamy; Solenne Brun                                                                                                                                                                                                                                                                                                                                                                      |
| EPI_ISL_483968                                                                      |  | Centre for Clinical Infection and Diagnostics                                                                                                                          | COVID-19 Genomics UK (COG-UK) Consortium                                                                                                                                                                                                                                                                                                                                 | Ali Raza Awan; Chloe Fisher; Jonathan Edgeworth; Luke Snell; Penny Cliff; Rahul Batra                                                                                                                                                                                                                                                                                                                                                                                                                                                                                                   |

|                                                                                                                                                                                                                                                                                                                                                                                                                                                                                                                                                                                                                                                                                                                                                                                                                                                                                                                                                                                                                                                                                                                                                                                                                                                                                                                                                                                                                                                                                                                                                                                                                                                                                                                                                                                                                                                                                                                                                                                                                                                                                                                                                                                                                                                                                                                                                                                       |                                                                                                                            |                                                                                                                             |                                                                                                                                                                                                                                                                                                                                                                                                                                                                               |                                                                                                                                                                                 |
|---------------------------------------------------------------------------------------------------------------------------------------------------------------------------------------------------------------------------------------------------------------------------------------------------------------------------------------------------------------------------------------------------------------------------------------------------------------------------------------------------------------------------------------------------------------------------------------------------------------------------------------------------------------------------------------------------------------------------------------------------------------------------------------------------------------------------------------------------------------------------------------------------------------------------------------------------------------------------------------------------------------------------------------------------------------------------------------------------------------------------------------------------------------------------------------------------------------------------------------------------------------------------------------------------------------------------------------------------------------------------------------------------------------------------------------------------------------------------------------------------------------------------------------------------------------------------------------------------------------------------------------------------------------------------------------------------------------------------------------------------------------------------------------------------------------------------------------------------------------------------------------------------------------------------------------------------------------------------------------------------------------------------------------------------------------------------------------------------------------------------------------------------------------------------------------------------------------------------------------------------------------------------------------------------------------------------------------------------------------------------------------|----------------------------------------------------------------------------------------------------------------------------|-----------------------------------------------------------------------------------------------------------------------------|-------------------------------------------------------------------------------------------------------------------------------------------------------------------------------------------------------------------------------------------------------------------------------------------------------------------------------------------------------------------------------------------------------------------------------------------------------------------------------|---------------------------------------------------------------------------------------------------------------------------------------------------------------------------------|
| EPI_ISL_427674, EPI_ISL_427768                                                                                                                                                                                                                                                                                                                                                                                                                                                                                                                                                                                                                                                                                                                                                                                                                                                                                                                                                                                                                                                                                                                                                                                                                                                                                                                                                                                                                                                                                                                                                                                                                                                                                                                                                                                                                                                                                                                                                                                                                                                                                                                                                                                                                                                                                                                                                        | Research and Genomics Innovation Unit, Guy's and St. Thomas' NHS Trust                                                     | NSW Health Pathology - Institute of Clinical Pathology and Medical Research; Westmead Hospital; University of Sydney        | Arnott A; Bachmann N; Basile K; Byun R; Carter I; Chang S; Chen SC; Draper J; Dwyer DE for the 2019-nCoV Study Group; Eden JS; Gall M; Gray K; Holmes EC; Kok J; Lam C; Maddocks S; O'Sullivan MV; Propenko M; Rockett R; Sadsad R; Sim E; Sintchenko V; Sorrell T; Timms V                                                                                                                                                                                                   |                                                                                                                                                                                 |
| EPI_ISL_535981                                                                                                                                                                                                                                                                                                                                                                                                                                                                                                                                                                                                                                                                                                                                                                                                                                                                                                                                                                                                                                                                                                                                                                                                                                                                                                                                                                                                                                                                                                                                                                                                                                                                                                                                                                                                                                                                                                                                                                                                                                                                                                                                                                                                                                                                                                                                                                        | Centre hospitalier Anna-Laberge                                                                                            | Laboratoire de santé publique du Québec                                                                                     | Guillaume Bourque; Ioannis Ragoussis; Jesse Shapiro; Mark Lathrop and Michel Roger on behalf of the CoVSeQ research group; Sandrine Moreira                                                                                                                                                                                                                                                                                                                                   |                                                                                                                                                                                 |
| EPI_ISL_666685                                                                                                                                                                                                                                                                                                                                                                                                                                                                                                                                                                                                                                                                                                                                                                                                                                                                                                                                                                                                                                                                                                                                                                                                                                                                                                                                                                                                                                                                                                                                                                                                                                                                                                                                                                                                                                                                                                                                                                                                                                                                                                                                                                                                                                                                                                                                                                        | Centre hospitalier Métropole Savoie                                                                                        | CNR Virus des Infections Respiratoires - France SUD                                                                         | Antonin Bal; Bruno Lina; Carine Dumollard; Gregory Destras; Gwendolynne Burfin; Hadrien Règue; Jérôme Grosjean; Laurence Josset; Martine Valette; Quentin Semanas                                                                                                                                                                                                                                                                                                             |                                                                                                                                                                                 |
| EPI_ISL_629023                                                                                                                                                                                                                                                                                                                                                                                                                                                                                                                                                                                                                                                                                                                                                                                                                                                                                                                                                                                                                                                                                                                                                                                                                                                                                                                                                                                                                                                                                                                                                                                                                                                                                                                                                                                                                                                                                                                                                                                                                                                                                                                                                                                                                                                                                                                                                                        | Centro de Biotecnología Vegetal, Universidad Andrés Bello, Center for Genome Regulation                                    | Center for Mathematical Modeling and Center for Genome Regulation. Santiago, Chile                                          | Allende ML; Arriagada G; Bastias M; Bustos F; Castro E; González M; M; Maass A; Meneses C.; Montecino; Orellana A; Sanhueza D; Travisany D                                                                                                                                                                                                                                                                                                                                    |                                                                                                                                                                                 |
| EPI_ISL_1531807, EPI_ISL_1531808, EPI_ISL_1531809, EPI_ISL_1531810, EPI_ISL_1531811, EPI_ISL_1531812, EPI_ISL_1531813, EPI_ISL_1531814, EPI_ISL_1531815, EPI_ISL_1531816, EPI_ISL_1531817, EPI_ISL_1531818, EPI_ISL_1531819, EPI_ISL_1531820, EPI_ISL_1531821, EPI_ISL_1531822, EPI_ISL_1531823, EPI_ISL_1531824, EPI_ISL_1531825, EPI_ISL_1531826, EPI_ISL_1531827, EPI_ISL_1531828, EPI_ISL_1531829, EPI_ISL_1531830, EPI_ISL_1531831, EPI_ISL_1531832, EPI_ISL_1531833, EPI_ISL_1531834, EPI_ISL_1531835, EPI_ISL_1531836, EPI_ISL_1531837, EPI_ISL_1531838, EPI_ISL_1531839, EPI_ISL_1531840, EPI_ISL_1531841, EPI_ISL_1531842, EPI_ISL_1531843, EPI_ISL_1531844, EPI_ISL_1531845, EPI_ISL_1531846, EPI_ISL_1531847, EPI_ISL_1531848, EPI_ISL_1531849, EPI_ISL_1531850, EPI_ISL_1531851, EPI_ISL_1531852, EPI_ISL_1531853, EPI_ISL_1531854, EPI_ISL_1531855, EPI_ISL_1531856, EPI_ISL_1531857, EPI_ISL_1531858, EPI_ISL_1531859, EPI_ISL_1531860, EPI_ISL_1531861, EPI_ISL_1531862, EPI_ISL_1531863, EPI_ISL_1531864, EPI_ISL_1531865, EPI_ISL_1531866, EPI_ISL_1531867, EPI_ISL_1531868, EPI_ISL_1531869, EPI_ISL_1531870, EPI_ISL_1531871, EPI_ISL_1531872, EPI_ISL_1531873, EPI_ISL_1531874, EPI_ISL_1531875, EPI_ISL_1531876, EPI_ISL_1531877, EPI_ISL_1531878, EPI_ISL_1531879, EPI_ISL_1531880, EPI_ISL_1531881, EPI_ISL_1531882, EPI_ISL_1531883, EPI_ISL_1531884, EPI_ISL_1531885, EPI_ISL_1531886, EPI_ISL_1531887, EPI_ISL_1531888, EPI_ISL_1531889, EPI_ISL_1531890, EPI_ISL_1531891, EPI_ISL_1531892, EPI_ISL_1531893, EPI_ISL_1531894, EPI_ISL_1531895, EPI_ISL_1531896, EPI_ISL_1531897, EPI_ISL_1531898, EPI_ISL_1531899, EPI_ISL_1531900, EPI_ISL_1531901, EPI_ISL_1531902, EPI_ISL_1531903, EPI_ISL_1531904, EPI_ISL_1531905, EPI_ISL_1531906, EPI_ISL_1531907, EPI_ISL_1531908, EPI_ISL_1531909, EPI_ISL_1531910, EPI_ISL_1531911, EPI_ISL_1531912, EPI_ISL_1531913, EPI_ISL_1531914, EPI_ISL_1531915, EPI_ISL_1531916, EPI_ISL_1531917, EPI_ISL_1531918, EPI_ISL_1531919, EPI_ISL_1531920, EPI_ISL_1531921, EPI_ISL_1531922, EPI_ISL_1531923, EPI_ISL_1531924, EPI_ISL_1531925, EPI_ISL_1531926, EPI_ISL_1531927, EPI_ISL_1531928, EPI_ISL_1531929, EPI_ISL_1531930, EPI_ISL_1531931, EPI_ISL_1531932, EPI_ISL_1531933, EPI_ISL_1531934, EPI_ISL_1531935, EPI_ISL_1531936, EPI_ISL_1531937, EPI_ISL_1531938, EPI_ISL_1531939, EPI_ISL_1531940, EPI_ISL_1531941 | see above                                                                                                                  | Centro de Diagnostico COVID-19 UAAC Tijuana                                                                                 | Andersen lab at Scripps Research                                                                                                                                                                                                                                                                                                                                                                                                                                              | German Ibarra; Jonathan Vincent Baena; Jorge Luis Jimenez Niebla; Manuel Sanchez Alavez; Oscar Efrén Zazueta Fierro; SEARCH Alliance San Diego with Idanya Rubi Serafin Higuera |
| EPI_ISL_635479, EPI_ISL_635480, EPI_ISL_635481, EPI_ISL_635482, EPI_ISL_635483, EPI_ISL_635484, EPI_ISL_635485, EPI_ISL_635486, EPI_ISL_635487, EPI_ISL_635488, EPI_ISL_635489, EPI_ISL_635490, EPI_ISL_635491, EPI_ISL_635492, EPI_ISL_635493, EPI_ISL_635494, EPI_ISL_635495, EPI_ISL_635496, EPI_ISL_635497, EPI_ISL_635498, EPI_ISL_635499, EPI_ISL_635500, EPI_ISL_635501, EPI_ISL_635502, EPI_ISL_635503, EPI_ISL_635504, EPI_ISL_635505, EPI_ISL_635506, EPI_ISL_635507, EPI_ISL_635508, EPI_ISL_635509, EPI_ISL_635510, EPI_ISL_635511, EPI_ISL_635512, EPI_ISL_635513, EPI_ISL_635514, EPI_ISL_635515, EPI_ISL_635516, EPI_ISL_635517, EPI_ISL_635518, EPI_ISL_635519, EPI_ISL_635520, EPI_ISL_635521, EPI_ISL_635522, EPI_ISL_635523, EPI_ISL_635524, EPI_ISL_635525, EPI_ISL_635526, EPI_ISL_635527, EPI_ISL_635528, EPI_ISL_635529, EPI_ISL_635530, EPI_ISL_635531, EPI_ISL_635532, EPI_ISL_635533, EPI_ISL_635534, EPI_ISL_635535, EPI_ISL_635536, EPI_ISL_635537, EPI_ISL_635538, EPI_ISL_635539, EPI_ISL_635540, EPI_ISL_635541, EPI_ISL_635542, EPI_ISL_635543, EPI_ISL_635544, EPI_ISL_635545, EPI_ISL_635546, EPI_ISL_635547, EPI_ISL_635548, EPI_ISL_635549, EPI_ISL_635550, EPI_ISL_635551, EPI_ISL_635552, EPI_ISL_635553, EPI_ISL_635554, EPI_ISL_635555, EPI_ISL_635556, EPI_ISL_635557, EPI_ISL_635558, EPI_ISL_635559, EPI_ISL_635560, EPI_ISL_635561, EPI_ISL_635562, EPI_ISL_635563, EPI_ISL_635564, EPI_ISL_635565, EPI_ISL_635566, EPI_ISL_635567, EPI_ISL_635568, EPI_ISL_635569, EPI_ISL_635570, EPI_ISL_635571, EPI_ISL_635572, EPI_ISL_635573, EPI_ISL_635574, EPI_ISL_635575, EPI_ISL_635576                                                                                                                                                                                                                                                                                                                                                                                                                                                                                                                                                                                                                                                                                                                                                        | see above                                                                                                                  | Centro de Diagn/ztico COVID-19 UAAC Tijuana                                                                                 | Andersen lab at Scripps Research                                                                                                                                                                                                                                                                                                                                                                                                                                              | Germán Ibarra; Jonathan Vincent Baena; Jorge Luis Jiménez Niebla; Manuel Sánchez Alavez; Oscar Efrén Zazueta Fierro; SEARCH Alliance San Diego with Idanya Rubí Serafin Higuera |
| EPI_ISL_1469108, EPI_ISL_1469109, EPI_ISL_1469110, EPI_ISL_1469111, EPI_ISL_1469112, EPI_ISL_1469113, EPI_ISL_1469114, EPI_ISL_1469115, EPI_ISL_1469116, EPI_ISL_1469117, EPI_ISL_1469118, EPI_ISL_1469119                                                                                                                                                                                                                                                                                                                                                                                                                                                                                                                                                                                                                                                                                                                                                                                                                                                                                                                                                                                                                                                                                                                                                                                                                                                                                                                                                                                                                                                                                                                                                                                                                                                                                                                                                                                                                                                                                                                                                                                                                                                                                                                                                                            | see above                                                                                                                  | Centro de Investigación en Ciencias de la Salud y Biomedicina                                                               | CINVESTAV                                                                                                                                                                                                                                                                                                                                                                                                                                                                     | Andreu Comas; Sofia Bernal                                                                                                                                                      |
| EPI_ISL_1494674, EPI_ISL_1494717                                                                                                                                                                                                                                                                                                                                                                                                                                                                                                                                                                                                                                                                                                                                                                                                                                                                                                                                                                                                                                                                                                                                                                                                                                                                                                                                                                                                                                                                                                                                                                                                                                                                                                                                                                                                                                                                                                                                                                                                                                                                                                                                                                                                                                                                                                                                                      | Centro de Investigación en Ciencias de la Salud y Biomedicina, U.A.S.L.P                                                   | Centro de Investigación en Ciencias de la Salud y Biomedicina, U.A.S.L.P                                                    |                                                                                                                                                                                                                                                                                                                                                                                                                                                                               | MD PhD Sofia Bernal Silva                                                                                                                                                       |
| EPI_ISL_1500639, EPI_ISL_1500866                                                                                                                                                                                                                                                                                                                                                                                                                                                                                                                                                                                                                                                                                                                                                                                                                                                                                                                                                                                                                                                                                                                                                                                                                                                                                                                                                                                                                                                                                                                                                                                                                                                                                                                                                                                                                                                                                                                                                                                                                                                                                                                                                                                                                                                                                                                                                      | Centro de Investigación en Ciencias de la Salud y Biomedicina, U.A.S.L.P.                                                  | Centro de Investigación en Ciencias de la Salud y Biomedicina, U.A.S.L.P.                                                   |                                                                                                                                                                                                                                                                                                                                                                                                                                                                               | MD PhD Sofia Bernal Silva                                                                                                                                                       |
| EPI_ISL_1494724, EPI_ISL_1494725, EPI_ISL_1494726, EPI_ISL_1494727, EPI_ISL_1494728, EPI_ISL_1494729, EPI_ISL_1494730                                                                                                                                                                                                                                                                                                                                                                                                                                                                                                                                                                                                                                                                                                                                                                                                                                                                                                                                                                                                                                                                                                                                                                                                                                                                                                                                                                                                                                                                                                                                                                                                                                                                                                                                                                                                                                                                                                                                                                                                                                                                                                                                                                                                                                                                 | see above                                                                                                                  | Centro de Investigación en Ciencias de la Salud y Biomedicina, U.A.S.L.P.                                                   | Centro de Investigación en Ciencias de la Salud y Biomedicina, U.A.S.L.P.                                                                                                                                                                                                                                                                                                                                                                                                     | MD PhD Sofia Bernal Silva                                                                                                                                                       |
| EPI_ISL_450522                                                                                                                                                                                                                                                                                                                                                                                                                                                                                                                                                                                                                                                                                                                                                                                                                                                                                                                                                                                                                                                                                                                                                                                                                                                                                                                                                                                                                                                                                                                                                                                                                                                                                                                                                                                                                                                                                                                                                                                                                                                                                                                                                                                                                                                                                                                                                                        | Centrālā Laboratorija                                                                                                      | Latvian Biomedical Research and Study Centre                                                                                | Ivars Silamikelis; Jana Osīte; Jānis Kloviņš; Kaspars Megnis; Marta Priedīte; Monta Ustinova; Stella Lapīņa; Uga Dumpis; Vita Rovīte; Nikita Zrelōvs                                                                                                                                                                                                                                                                                                                          |                                                                                                                                                                                 |
| EPI_ISL_729477, EPI_ISL_753918, EPI_ISL_753988, EPI_ISL_754006                                                                                                                                                                                                                                                                                                                                                                                                                                                                                                                                                                                                                                                                                                                                                                                                                                                                                                                                                                                                                                                                                                                                                                                                                                                                                                                                                                                                                                                                                                                                                                                                                                                                                                                                                                                                                                                                                                                                                                                                                                                                                                                                                                                                                                                                                                                        | Charité Universitätsmedizin Berlin, Institut für Virologie/Labor Berlin                                                    | Charité Universitätsmedizin Berlin, Institut für Virologie                                                                  | Barbara Mühlemann; Christian Drosten; Julia Schneider; Jörn Beheim-Schwarzbach; Talitha Veith; Terry Jones; Victor M Corman                                                                                                                                                                                                                                                                                                                                                   |                                                                                                                                                                                 |
| EPI_ISL_468071, EPI_ISL_468077                                                                                                                                                                                                                                                                                                                                                                                                                                                                                                                                                                                                                                                                                                                                                                                                                                                                                                                                                                                                                                                                                                                                                                                                                                                                                                                                                                                                                                                                                                                                                                                                                                                                                                                                                                                                                                                                                                                                                                                                                                                                                                                                                                                                                                                                                                                                                        | Child Health Research Foundation                                                                                           | Child Health Research Foundation                                                                                            | Afroza Akter Tanni; Hafizur Rahman; Maksuda Islam; Md Saiful Islam Sajib; Roly Malaker; Samir K Saha; Senjuti Saha; Syed Mukhtar Al Sium                                                                                                                                                                                                                                                                                                                                      |                                                                                                                                                                                 |
| EPI_ISL_437912                                                                                                                                                                                                                                                                                                                                                                                                                                                                                                                                                                                                                                                                                                                                                                                                                                                                                                                                                                                                                                                                                                                                                                                                                                                                                                                                                                                                                                                                                                                                                                                                                                                                                                                                                                                                                                                                                                                                                                                                                                                                                                                                                                                                                                                                                                                                                                        | Child Health Research Foundation                                                                                           | Child Health Research Lab                                                                                                   | Maksuda Islam; Md Hafizur Rahman; Md Hasanuzzaman; Md Saiful Islam Sajib; Md Shahidul Islam; Roly Malaker; Samir K Saha; Senjuti Saha; Zabed B Ahmed                                                                                                                                                                                                                                                                                                                          |                                                                                                                                                                                 |
| EPI_ISL_447427, EPI_ISL_447450                                                                                                                                                                                                                                                                                                                                                                                                                                                                                                                                                                                                                                                                                                                                                                                                                                                                                                                                                                                                                                                                                                                                                                                                                                                                                                                                                                                                                                                                                                                                                                                                                                                                                                                                                                                                                                                                                                                                                                                                                                                                                                                                                                                                                                                                                                                                                        | Clinical Microbiology Laboratory, Sheba Medical Center                                                                     | Stern Lab                                                                                                                   | Stern Lab                                                                                                                                                                                                                                                                                                                                                                                                                                                                     |                                                                                                                                                                                 |
| EPI_ISL_528022, EPI_ISL_528046                                                                                                                                                                                                                                                                                                                                                                                                                                                                                                                                                                                                                                                                                                                                                                                                                                                                                                                                                                                                                                                                                                                                                                                                                                                                                                                                                                                                                                                                                                                                                                                                                                                                                                                                                                                                                                                                                                                                                                                                                                                                                                                                                                                                                                                                                                                                                        | Clinical Virology                                                                                                          | Clinical Bacteriology                                                                                                       | Adrian Egli; Alexander Gensch; Alfredo Mari; Christian Nickel; Hans Hirsch; Hans Pargger; Helena MB Seth-Smith; Julia Bielicki; Karoline Leuzinger; Kirstine K. Soegaard; Madlen Stange; Manuel Battegay; Martin Siegemund; Michael Osthoff; Michael Schweitzer; Myrta Brunner; Rita Schneider-SilFemalea; Roland Bingisser; Sarah Tschudin-Sutter; Simon Fuchs; Stefano Bassetti; Tim Roloff                                                                                 |                                                                                                                                                                                 |
| EPI_ISL_605816                                                                                                                                                                                                                                                                                                                                                                                                                                                                                                                                                                                                                                                                                                                                                                                                                                                                                                                                                                                                                                                                                                                                                                                                                                                                                                                                                                                                                                                                                                                                                                                                                                                                                                                                                                                                                                                                                                                                                                                                                                                                                                                                                                                                                                                                                                                                                                        | Clinical Virology Laboratory, Institute of Liver and Biliary Sciences                                                      | ILBS - IGIB                                                                                                                 | Abhishek Padhi; Ekta Gupta; Jaswinder Singh Maras; Reshu Agarwal; Sheetalnath Rooge; Shridhar Sivasubbu; Shvetank Sharma; Vinod Scaria                                                                                                                                                                                                                                                                                                                                        |                                                                                                                                                                                 |
| EPI_ISL_447324                                                                                                                                                                                                                                                                                                                                                                                                                                                                                                                                                                                                                                                                                                                                                                                                                                                                                                                                                                                                                                                                                                                                                                                                                                                                                                                                                                                                                                                                                                                                                                                                                                                                                                                                                                                                                                                                                                                                                                                                                                                                                                                                                                                                                                                                                                                                                                        | Clinical Virology Laboratory, Soroka Medical Center and the Faculty of Health Sciences, Ben-Gurion University of the Negev | Stern Lab                                                                                                                   | Stern Lab                                                                                                                                                                                                                                                                                                                                                                                                                                                                     |                                                                                                                                                                                 |
| EPI_ISL_527416, EPI_ISL_527431                                                                                                                                                                                                                                                                                                                                                                                                                                                                                                                                                                                                                                                                                                                                                                                                                                                                                                                                                                                                                                                                                                                                                                                                                                                                                                                                                                                                                                                                                                                                                                                                                                                                                                                                                                                                                                                                                                                                                                                                                                                                                                                                                                                                                                                                                                                                                        | Colorado State University - Ebel Lab                                                                                       | Colorado State University - Ebel Lab                                                                                        | Greg Ebel et al.                                                                                                                                                                                                                                                                                                                                                                                                                                                              |                                                                                                                                                                                 |
| EPI_ISL_632265                                                                                                                                                                                                                                                                                                                                                                                                                                                                                                                                                                                                                                                                                                                                                                                                                                                                                                                                                                                                                                                                                                                                                                                                                                                                                                                                                                                                                                                                                                                                                                                                                                                                                                                                                                                                                                                                                                                                                                                                                                                                                                                                                                                                                                                                                                                                                                        | Communicable Disease Laboratory, Public Health Directorate                                                                 | Communicable Disease Laboratory, Public Health Directorate                                                                  | AlAbbas, Z.; AlHujairi, Z.; AlTaif, Z.; AlWasti, H.                                                                                                                                                                                                                                                                                                                                                                                                                           |                                                                                                                                                                                 |
| EPI_ISL_474816                                                                                                                                                                                                                                                                                                                                                                                                                                                                                                                                                                                                                                                                                                                                                                                                                                                                                                                                                                                                                                                                                                                                                                                                                                                                                                                                                                                                                                                                                                                                                                                                                                                                                                                                                                                                                                                                                                                                                                                                                                                                                                                                                                                                                                                                                                                                                                        | Complejo Hospitalario Universitario de Albacete                                                                            | SeqCOVID-SPAIN consortium/IBV(CSIC)                                                                                         | Caridad Sainz de Baranda Camino and SeqCOVID-SPAIN consortium; Encarnacion Simarro Córdoba; Julia Lozano Serra; Lorena Robles Fonseca; Monica Parra Grandes                                                                                                                                                                                                                                                                                                                   |                                                                                                                                                                                 |
| EPI_ISL_700441                                                                                                                                                                                                                                                                                                                                                                                                                                                                                                                                                                                                                                                                                                                                                                                                                                                                                                                                                                                                                                                                                                                                                                                                                                                                                                                                                                                                                                                                                                                                                                                                                                                                                                                                                                                                                                                                                                                                                                                                                                                                                                                                                                                                                                                                                                                                                                        | Convillie CDC wc CVC                                                                                                       | NHLS/UCT                                                                                                                    | Arash Iranzadeh; Bruna Galvao; Carolyn Williamson; Deelan Doolabh; Diana Hardie; Houriiyah Tegally; Innocent Mudau; Kruger Marais; Lynn Tyters; Marvin Hsiao; Stephen Korsman                                                                                                                                                                                                                                                                                                 |                                                                                                                                                                                 |
| EPI_ISL_468389                                                                                                                                                                                                                                                                                                                                                                                                                                                                                                                                                                                                                                                                                                                                                                                                                                                                                                                                                                                                                                                                                                                                                                                                                                                                                                                                                                                                                                                                                                                                                                                                                                                                                                                                                                                                                                                                                                                                                                                                                                                                                                                                                                                                                                                                                                                                                                        | County of San Luis Obispo Public Health Laboratory                                                                         | Chan-Zuckerberg Biohub                                                                                                      | CZB Cliahub Consortium                                                                                                                                                                                                                                                                                                                                                                                                                                                        |                                                                                                                                                                                 |
| EPI_ISL_437044                                                                                                                                                                                                                                                                                                                                                                                                                                                                                                                                                                                                                                                                                                                                                                                                                                                                                                                                                                                                                                                                                                                                                                                                                                                                                                                                                                                                                                                                                                                                                                                                                                                                                                                                                                                                                                                                                                                                                                                                                                                                                                                                                                                                                                                                                                                                                                        | County of Santa Clara Public Health                                                                                        | Chan-Zuckerberg Biohub                                                                                                      | CZB Cliahub Consortium                                                                                                                                                                                                                                                                                                                                                                                                                                                        |                                                                                                                                                                                 |
| EPI_ISL_436641, EPI_ISL_436672                                                                                                                                                                                                                                                                                                                                                                                                                                                                                                                                                                                                                                                                                                                                                                                                                                                                                                                                                                                                                                                                                                                                                                                                                                                                                                                                                                                                                                                                                                                                                                                                                                                                                                                                                                                                                                                                                                                                                                                                                                                                                                                                                                                                                                                                                                                                                        | County of Santa Clara Public Health Department                                                                             | Chan-Zuckerberg Biohub                                                                                                      | CZB Cliahub Consortium                                                                                                                                                                                                                                                                                                                                                                                                                                                        |                                                                                                                                                                                 |
| EPI_ISL_560647                                                                                                                                                                                                                                                                                                                                                                                                                                                                                                                                                                                                                                                                                                                                                                                                                                                                                                                                                                                                                                                                                                                                                                                                                                                                                                                                                                                                                                                                                                                                                                                                                                                                                                                                                                                                                                                                                                                                                                                                                                                                                                                                                                                                                                                                                                                                                                        | Delaware Public Health Lab                                                                                                 | Delaware Public Health Lab                                                                                                  | Gregory Hovan                                                                                                                                                                                                                                                                                                                                                                                                                                                                 |                                                                                                                                                                                 |
| EPI_ISL_417008, EPI_ISL_417018, EPI_ISL_515061                                                                                                                                                                                                                                                                                                                                                                                                                                                                                                                                                                                                                                                                                                                                                                                                                                                                                                                                                                                                                                                                                                                                                                                                                                                                                                                                                                                                                                                                                                                                                                                                                                                                                                                                                                                                                                                                                                                                                                                                                                                                                                                                                                                                                                                                                                                                        | Department of Clinical Microbiology                                                                                        | GIGA Medical Genomics                                                                                                       | Artesi Maria; Axelle Chaslain; Bontems Sébastien; Boreux Raphaël; Bours Vincent.; Cecile Mee; Celine Fombellida-Lopez; Durkin Keith; Hayette Marie-Pierre; Keith Durkin; Maria Artesi; Marie-Pierre Hayette; Meex Cécile; Melin Pierrette; Pierrette Melin; Raphael Boreux; Sébastien Bontems; Vincent Bours.                                                                                                                                                                 |                                                                                                                                                                                 |
| EPI_ISL_429285, EPI_ISL_452032                                                                                                                                                                                                                                                                                                                                                                                                                                                                                                                                                                                                                                                                                                                                                                                                                                                                                                                                                                                                                                                                                                                                                                                                                                                                                                                                                                                                                                                                                                                                                                                                                                                                                                                                                                                                                                                                                                                                                                                                                                                                                                                                                                                                                                                                                                                                                        | Department of Clinical Microbiology, Copenhagen University Hospital, Hvidovre, Kettegaard Alle 30, 2650 Hvidovre.          | Albertsen lab, Department of Chemistry and Bioscience, Aalborg University, Denmark                                          | Rasmus Kirkegaard                                                                                                                                                                                                                                                                                                                                                                                                                                                             |                                                                                                                                                                                 |
| EPI_ISL_417187                                                                                                                                                                                                                                                                                                                                                                                                                                                                                                                                                                                                                                                                                                                                                                                                                                                                                                                                                                                                                                                                                                                                                                                                                                                                                                                                                                                                                                                                                                                                                                                                                                                                                                                                                                                                                                                                                                                                                                                                                                                                                                                                                                                                                                                                                                                                                                        | Department of Clinical Pathology, Pamela Youde Nethersole Eastern Hospital                                                 | Department of Health Technology and Informatics, Faculty of Health and Social Science, The Hong Kong Polytechnic University | Alan Ka-Lun WU; Alex Yat-Man HO; Barry Kin-Chung WONG; David Ho-Keung SHUM; Eugene Yuk-Keung TSO; Gilman Kit-Hang SIU; Hiu-Yin LAO; Kam-Tong Yip; Kenneth Siu-Sing LEUNG; Kingsley King-Gee TAM; Kit-Man SIN; Kitty Sau-Chun FUNG; Kwok-Cheung LUNG; Lam-Kwong LEE; Man-Chun CHAN; Ming-Pan CHOI; Miranda Chong-Yee YAU; Raymond Wai-To LUJ; Sandy Ka-Yee CHAU; Shea Ping YIP; Tak-Lun Que; Timothy Ting-Leung NG; Wai-Shing LEUNG; Wing Cheong YAM; Wing-Kin To; Yuk-Yung NG |                                                                                                                                                                                 |
| EPI_ISL_481261                                                                                                                                                                                                                                                                                                                                                                                                                                                                                                                                                                                                                                                                                                                                                                                                                                                                                                                                                                                                                                                                                                                                                                                                                                                                                                                                                                                                                                                                                                                                                                                                                                                                                                                                                                                                                                                                                                                                                                                                                                                                                                                                                                                                                                                                                                                                                                        | Department of Emerging Infectious Diseases, Institute of Tropical Medicine, Nagasaki University                            | Department of Emerging Infectious Diseases, Institute of Tropical Medicine, Nagasaki University                             | Haruka Abe; Jiro Yasuda; Rokusuke Yoshikawa; Yuichiro Furusato                                                                                                                                                                                                                                                                                                                                                                                                                |                                                                                                                                                                                 |
| EPI_ISL_568564                                                                                                                                                                                                                                                                                                                                                                                                                                                                                                                                                                                                                                                                                                                                                                                                                                                                                                                                                                                                                                                                                                                                                                                                                                                                                                                                                                                                                                                                                                                                                                                                                                                                                                                                                                                                                                                                                                                                                                                                                                                                                                                                                                                                                                                                                                                                                                        | Department of Infectious Diseases and Immunology, National Hospital Organization Nagoya Medical Center                     | Clinical Research Center, National Hospital Organization Nagoya Medical Center                                              | Hirokata Ode; Kazuhiro Matsuka; Mai Kubota; Masakazu Matsuda; Mayumi Imahashi; Mikiko Mori; Nakasuji Miho; Yasumasa Iwatani; Yoshihiro Nakata; Yoshiyuki Yokomaku                                                                                                                                                                                                                                                                                                             |                                                                                                                                                                                 |
| EPI_ISL_644945                                                                                                                                                                                                                                                                                                                                                                                                                                                                                                                                                                                                                                                                                                                                                                                                                                                                                                                                                                                                                                                                                                                                                                                                                                                                                                                                                                                                                                                                                                                                                                                                                                                                                                                                                                                                                                                                                                                                                                                                                                                                                                                                                                                                                                                                                                                                                                        | Department of Infectious Diseases, Keio University School of Medicine, Tokyo, Japan                                        | Center for Medical Genetics, Keio University School of Medicine, Tokyo, Japan                                               | Haruhiko Siomi; Hirotugu Ishizu; Kenjiro Kosaki; Kodai Abe; Yuka Iwasaki                                                                                                                                                                                                                                                                                                                                                                                                      |                                                                                                                                                                                 |
| EPI_ISL_422407                                                                                                                                                                                                                                                                                                                                                                                                                                                                                                                                                                                                                                                                                                                                                                                                                                                                                                                                                                                                                                                                                                                                                                                                                                                                                                                                                                                                                                                                                                                                                                                                                                                                                                                                                                                                                                                                                                                                                                                                                                                                                                                                                                                                                                                                                                                                                                        | Department of Laboratory Medicine, National Taiwan University Hospital                                                     | Microbial Genomics Core Lab, National Taiwan University Centers of Genomic and Precision Medicine                           | Chiao-Ling Li; Pei-Jer Chen; Shan-Chwen Chang; Shiou-Hwei Yeh; Sui-Yuan Chang; Ya-Yun Lai; You-Yu Lin                                                                                                                                                                                                                                                                                                                                                                         |                                                                                                                                                                                 |
| EPI_ISL_492849                                                                                                                                                                                                                                                                                                                                                                                                                                                                                                                                                                                                                                                                                                                                                                                                                                                                                                                                                                                                                                                                                                                                                                                                                                                                                                                                                                                                                                                                                                                                                                                                                                                                                                                                                                                                                                                                                                                                                                                                                                                                                                                                                                                                                                                                                                                                                                        | Department of Medical Microbiology, Western Sussex Hospitals NHS Foundation Trust, St Richard's Hospital                   | Wellcome Sanger Institute for the COVID-19 Genomics UK (COG-UK) consortium                                                  | Cordelia Langford; David K. Jackson; Dominic Kwiatkowski; Ewan Harrison; Ian Johnston; John Sillitoe on behalf of the Wellcome Sanger Institute COVID-19 Surveillance Team ( <a href="http://www.sanger.ac.uk/covid-team">http://www.sanger.ac.uk/covid-team</a> ); Jonathan Lewis; Manasa Mutingwende; Michelle Erkiert; Olga Podplomyk; Paul Randell and Alex Alderton; Roberto Amato; Sarah Lowdon; Sonia Goncalves                                                        |                                                                                                                                                                                 |
| EPI_ISL_497771, EPI_ISL_497864                                                                                                                                                                                                                                                                                                                                                                                                                                                                                                                                                                                                                                                                                                                                                                                                                                                                                                                                                                                                                                                                                                                                                                                                                                                                                                                                                                                                                                                                                                                                                                                                                                                                                                                                                                                                                                                                                                                                                                                                                                                                                                                                                                                                                                                                                                                                                        | Department of Microbiology, The University of Hong Kong                                                                    | Department of Microbiology, The University of Hong Kong                                                                     | Kelvin K.W. To; Kwok-Yung Yuen                                                                                                                                                                                                                                                                                                                                                                                                                                                |                                                                                                                                                                                 |
| EPI_ISL_438678, EPI_ISL_573138, EPI_ISL_612272                                                                                                                                                                                                                                                                                                                                                                                                                                                                                                                                                                                                                                                                                                                                                                                                                                                                                                                                                                                                                                                                                                                                                                                                                                                                                                                                                                                                                                                                                                                                                                                                                                                                                                                                                                                                                                                                                                                                                                                                                                                                                                                                                                                                                                                                                                                                        | Department of Pathology, University of Cambridge                                                                           | COVID-19 Genomics UK (COG-UK) Consortium                                                                                    | Aminu S. Jahun; Anna Yakovleva; Charlotte J. Houldcroft; Fahad A Khokhar; Grant Hall; Ian Goodfellow; Ilana Georgana; Laura G Caller; Luke W Meredith; M. Est'©e Tväråk; Malte Pinkert; Martin D. Curran; Myra Hosmillo; Sarah L. Caddy; Surendra Parmar; Theresa Feltwell; William L. Hamilton; Yasmin Chaudhry                                                                                                                                                              |                                                                                                                                                                                 |

|                                                                                                                                                                                                                                                                                                                                                                                                                                                                                                                                                                                                                                                                                                                                                                                                                                                                                                                                                                                                                                                                                                                                                                                                                                                                                                                                                                                                 |           |                                                                                                                                             |                                                                                                                                                                               |                                                                                                                                                                                                                                                                                                                                                                                                                                                                                                                                                                  |
|-------------------------------------------------------------------------------------------------------------------------------------------------------------------------------------------------------------------------------------------------------------------------------------------------------------------------------------------------------------------------------------------------------------------------------------------------------------------------------------------------------------------------------------------------------------------------------------------------------------------------------------------------------------------------------------------------------------------------------------------------------------------------------------------------------------------------------------------------------------------------------------------------------------------------------------------------------------------------------------------------------------------------------------------------------------------------------------------------------------------------------------------------------------------------------------------------------------------------------------------------------------------------------------------------------------------------------------------------------------------------------------------------|-----------|---------------------------------------------------------------------------------------------------------------------------------------------|-------------------------------------------------------------------------------------------------------------------------------------------------------------------------------|------------------------------------------------------------------------------------------------------------------------------------------------------------------------------------------------------------------------------------------------------------------------------------------------------------------------------------------------------------------------------------------------------------------------------------------------------------------------------------------------------------------------------------------------------------------|
| EPI_ISL_438364, EPI_ISL_438362, EPI_ISL_438427, EPI_ISL_439574, EPI_ISL_439884, EPI_ISL_440287, EPI_ISL_440297, EPI_ISL_441289, EPI_ISL_442230                                                                                                                                                                                                                                                                                                                                                                                                                                                                                                                                                                                                                                                                                                                                                                                                                                                                                                                                                                                                                                                                                                                                                                                                                                                  | see above | Department of Pathology, University of Cambridge                                                                                            | Wellcome Sanger Institute for the COVID-19 Genomics UK (COG-UK) consortium                                                                                                    | Alex Alderton; Aminu S. Jahun; Anna Yakovleva; Charlotte J. Houldcroft; Cordelia Langford; David K. Jackson; Dominic Kwiatkowski; Ewan Harrison; Fahad A Khokhar; Grant Hall; Ian Goodfellow; Ian Johnston; John Sillitoe on behalf of the Wellcome Sanger Institute COVID-19 Surveillance Team ( <a href="http://www.sanger.ac.uk/covid-team">http://www.sanger.ac.uk/covid-team</a> ); Laura G Caller; Luke W Meredith; M. Estée Török; Martin D. Curran; Myra Hosmillo; Roberto Amato; Sarah L. Caddy; Sonia Goncalves; Theresa Feltwell; William L. Hamilton |
| EPI_ISL_418390, EPI_ISL_481647                                                                                                                                                                                                                                                                                                                                                                                                                                                                                                                                                                                                                                                                                                                                                                                                                                                                                                                                                                                                                                                                                                                                                                                                                                                                                                                                                                  |           | Department of Virology and Immunology, University of Helsinki and Helsinki University Hospital, HUSLAB Finland                              | Department of Virology, Faculty of Medicine, University of Helsinki, Helsinki, Finland                                                                                        | Hannimari Kallio-Kokko; Harri Kangas; Jenni Virtanen; Maija Suvanto; Olli Vapalahti; Pekka Ellonen; Sari Hannula; Teemu Smura                                                                                                                                                                                                                                                                                                                                                                                                                                    |
| EPI_ISL_671267, EPI_ISL_682655                                                                                                                                                                                                                                                                                                                                                                                                                                                                                                                                                                                                                                                                                                                                                                                                                                                                                                                                                                                                                                                                                                                                                                                                                                                                                                                                                                  |           | Department of Virus and Microbiological Special Diagnostics, Statens Serum Institut, Copenhagen, Denmark                                    | Albertsen Lab, Department of Chemistry and Bioscience, Aalborg University, Denmark                                                                                            | Danish Covid-19 Genome Consortium                                                                                                                                                                                                                                                                                                                                                                                                                                                                                                                                |
| EPI_ISL_437021, EPI_ISL_437647, EPI_ISL_437663                                                                                                                                                                                                                                                                                                                                                                                                                                                                                                                                                                                                                                                                                                                                                                                                                                                                                                                                                                                                                                                                                                                                                                                                                                                                                                                                                  |           | Department of Virus and Microbiological Special Diagnostics, Statens Serum Institut, Copenhagen, Denmark, Artillerivej 5, 2300 Copenhagen S | Albertsen lab, Department of Chemistry and Bioscience, Aalborg University, Denmark                                                                                            | Rasmus Kirkegaard                                                                                                                                                                                                                                                                                                                                                                                                                                                                                                                                                |
| EPI_ISL_614437, EPI_ISL_614488, EPI_ISL_614557, EPI_ISL_614581, EPI_ISL_614657, EPI_ISL_615213, EPI_ISL_615467, EPI_ISL_615680, EPI_ISL_616029, EPI_ISL_616310, EPI_ISL_616503, EPI_ISL_616617, EPI_ISL_616719, EPI_ISL_616787, EPI_ISL_616855, EPI_ISL_617756, EPI_ISL_618036, EPI_ISL_618374, EPI_ISL_619978, EPI_ISL_620200, EPI_ISL_620286, EPI_ISL_620364, EPI_ISL_621648, EPI_ISL_622042, EPI_ISL_622168, EPI_ISL_622259, EPI_ISL_622332, EPI_ISL_622429, EPI_ISL_622531, EPI_ISL_622596                                                                                                                                                                                                                                                                                                                                                                                                                                                                                                                                                                                                                                                                                                                                                                                                                                                                                                  | see above | Department of Virus and Microbiological Special Diagnostics, Statens Serum Institut, Denmark                                                | Albertsen lab, Department of Chemistry and Bioscience, Aalborg University, Denmark                                                                                            | Danish Covid-19 Genome Consortia                                                                                                                                                                                                                                                                                                                                                                                                                                                                                                                                 |
| EPI_ISL_415648                                                                                                                                                                                                                                                                                                                                                                                                                                                                                                                                                                                                                                                                                                                                                                                                                                                                                                                                                                                                                                                                                                                                                                                                                                                                                                                                                                                  |           | Department of Virus and Microbiological Special diagnostics, Statens Serum Institut, Copenhagen, Denmark.                                   | VIFU                                                                                                                                                                          | Anders Fomsgaard; Maiken Worsøe Rosenstjerne; Morten Rasmussen                                                                                                                                                                                                                                                                                                                                                                                                                                                                                                   |
| EPI_ISL_666602                                                                                                                                                                                                                                                                                                                                                                                                                                                                                                                                                                                                                                                                                                                                                                                                                                                                                                                                                                                                                                                                                                                                                                                                                                                                                                                                                                                  |           | Dept. of Microbiology and Infection Control, Akershus University Hospital HF                                                                | Dept. of Microbiology and Infection Control, Akershus University Hospital HF                                                                                                  | Alexander Hesselberg Lovestad; Hege Vangstein Aamot; Nina Handal; Ole Herman Ambur; Silje Bakken Jørgensen                                                                                                                                                                                                                                                                                                                                                                                                                                                       |
| EPI_ISL_774894                                                                                                                                                                                                                                                                                                                                                                                                                                                                                                                                                                                                                                                                                                                                                                                                                                                                                                                                                                                                                                                                                                                                                                                                                                                                                                                                                                                  |           | Designated Reference Institute for Chemical Measurements (DRICM)                                                                            | DNA SOLUTION LTD.                                                                                                                                                             | Abdul Khaleque; Abu Sufian; Hasan Ul Haider; Jannatun Naima; Kazi Nadim Hasan; MSM Chowdhury; Mala Khan; Mamudul Hasan Razu; Md. Imran Khan; Mizanur Rahman; Mohammad Fazle Alam Rabbi                                                                                                                                                                                                                                                                                                                                                                           |
| EPI_ISL_722872                                                                                                                                                                                                                                                                                                                                                                                                                                                                                                                                                                                                                                                                                                                                                                                                                                                                                                                                                                                                                                                                                                                                                                                                                                                                                                                                                                                  |           | Dipartimento di Scienze Biomediche e Oncologia Umana - Azienda Ospedaliero Universitaria Consorziale Policlinico                            | Istituto Zooprofilattico Sperimentale della Puglia e della Basilicata                                                                                                         | Bianco A.; Capozzi L.; Chironna M.; Del Sambito L.; Loconsole D.; Parisi A.                                                                                                                                                                                                                                                                                                                                                                                                                                                                                      |
| EPI_ISL_504185                                                                                                                                                                                                                                                                                                                                                                                                                                                                                                                                                                                                                                                                                                                                                                                                                                                                                                                                                                                                                                                                                                                                                                                                                                                                                                                                                                                  |           | Discovery DNA                                                                                                                               | Discovery DNA                                                                                                                                                                 | Alice Li; Aneal Khan; Desmond Koo; Dustin Hittel; Leo Dimnik; Marina Kerr                                                                                                                                                                                                                                                                                                                                                                                                                                                                                        |
| EPI_ISL_760151                                                                                                                                                                                                                                                                                                                                                                                                                                                                                                                                                                                                                                                                                                                                                                                                                                                                                                                                                                                                                                                                                                                                                                                                                                                                                                                                                                                  |           | Division of Emerging Infectious Diseases, Bureau of Infectious Diseases Diagnosis Control, Korea Disease Control and Prevention Agency      | Division of Emerging Infectious Diseases, Bureau of Infectious Diseases Diagnosis Control, Korea Disease Control and Prevention Agency                                        | Ae Kyung Park; Chaeyoung Lee; Eun-Jin Kim; Heui Man Kim; Il-Hwan Kim; Jeong-Min Kim; Namjoo Lee; Sang Hee Woo                                                                                                                                                                                                                                                                                                                                                                                                                                                    |
| EPI_ISL_497961, EPI_ISL_510609, EPI_ISL_526708                                                                                                                                                                                                                                                                                                                                                                                                                                                                                                                                                                                                                                                                                                                                                                                                                                                                                                                                                                                                                                                                                                                                                                                                                                                                                                                                                  |           | Division of Viral Diseases, Center for Laboratory Control of Infectious Diseases, Korea Centers for Diseases Control and Prevention         | Division of Viral Diseases, Center for Laboratory Control of Infectious Diseases, Korea Centers for Diseases Control and Prevention                                           | Heui Man Kim; Hye-Jun Jo; Jeong-Min Kim; Jun-Sub Kim; Myung Guk Han; Namjoo Lee; Sang Hee Woo; Yoon-Seok Chung                                                                                                                                                                                                                                                                                                                                                                                                                                                   |
| EPI_ISL_700552, EPI_ISL_700567                                                                                                                                                                                                                                                                                                                                                                                                                                                                                                                                                                                                                                                                                                                                                                                                                                                                                                                                                                                                                                                                                                                                                                                                                                                                                                                                                                  |           | Dr Abdurahman CDC wc DAC                                                                                                                    | NHLS/UCT                                                                                                                                                                      | Arash Iranzadeh; Bruna Galvao; Carolyn Williamson; Deelan Doolabh; Diana Hardie; Innocent Mudau; Kruger Marais; Lynn Tyers; Marvin Hsiao; Stephen Korsman                                                                                                                                                                                                                                                                                                                                                                                                        |
| EPI_ISL_414530, EPI_ISL_422855, EPI_ISL_455196, EPI_ISL_460643, EPI_ISL_523127, EPI_ISL_523199, EPI_ISL_523341, EPI_ISL_523460, EPI_ISL_523523, EPI_ISL_523614, EPI_ISL_523664, EPI_ISL_632518, EPI_ISL_722800                                                                                                                                                                                                                                                                                                                                                                                                                                                                                                                                                                                                                                                                                                                                                                                                                                                                                                                                                                                                                                                                                                                                                                                  | see above | Dutch COVID-19 response team                                                                                                                | Erasmus Medical Center                                                                                                                                                        | Anne van der Linden; Annemiek van der Eijk; Aura Timen; Bas Oude Munnink; Claudia Schapendonk; Corien Swaan; Corine GeurtsvanKessel; David Nieuwenhuijse; Emmanuelle Munger; Irina Chestakova; Jeroen van Kampen; Jolanda Voermans; Madelief Molters; Manon Haverkate; Marion Koopmans; Marjan Boter; Mark Pronk; Mart Stein; Pascal Lexmond; Reina Sikkema; Richard Molenkamp; Sandra Kengne Kanga Mobou; Stefan van Nieuwkoop; Theo Bestebroer; on behalf of the Dutch national COVID-19 response team.                                                        |
| EPI_ISL_454766, EPI_ISL_547557                                                                                                                                                                                                                                                                                                                                                                                                                                                                                                                                                                                                                                                                                                                                                                                                                                                                                                                                                                                                                                                                                                                                                                                                                                                                                                                                                                  |           | Dutch COVID-19 response team                                                                                                                | National Institute for Public Health and the Environment (RIVM)                                                                                                               | Adam Meijer; AnneMarie van den Brandt; Bas van der Veer; Chantal Reusken; Dennis Schmitz; Florian Zwagemaker; Harry Vennema; Jeroen Cremer; Pieter Overduin; Sharon van den Brink; on behalf of the national COVID-19 response team                                                                                                                                                                                                                                                                                                                              |
| EPI_ISL_1238787, EPI_ISL_1238788, EPI_ISL_1238789, EPI_ISL_1238790, EPI_ISL_1238791, EPI_ISL_1238792, EPI_ISL_1238793                                                                                                                                                                                                                                                                                                                                                                                                                                                                                                                                                                                                                                                                                                                                                                                                                                                                                                                                                                                                                                                                                                                                                                                                                                                                           | see above | Ecological and Evolutionary Genomics. UGA-CINVESTAV                                                                                         | Unidad Universitaria de Secuenciación Masiva y Bioinformática (UUSMB). IBT-UNAM                                                                                               | Angelica Cibrian                                                                                                                                                                                                                                                                                                                                                                                                                                                                                                                                                 |
| EPI_ISL_614265                                                                                                                                                                                                                                                                                                                                                                                                                                                                                                                                                                                                                                                                                                                                                                                                                                                                                                                                                                                                                                                                                                                                                                                                                                                                                                                                                                                  |           | Eurofins                                                                                                                                    | National Reference Center for Viruses of Respiratory Infections, Institut Pasteur, Paris                                                                                      | Angela Brisebarre; Camille Capel; Etienne Simon-Lorière; Marion Barbet; Maud Vanpeene; Méline Bizard; Sylvie Behillili; Sylvie van der Werf; Vincent Enouf                                                                                                                                                                                                                                                                                                                                                                                                       |
| EPI_ISL_424855                                                                                                                                                                                                                                                                                                                                                                                                                                                                                                                                                                                                                                                                                                                                                                                                                                                                                                                                                                                                                                                                                                                                                                                                                                                                                                                                                                                  |           | FL Bureau of Public Health Laboratories- Tampa                                                                                              | Pathogen Discovery, Respiratory Viruses Branch, Division of Viral Diseases, Centers for Disease Control and Prevention                                                        | Alison S. Laufer Halpin; Anna Uehara; Christopher A. Elkins; Clinton R. Paden; Halbin Wang; Jing Zhang; Krista Queen; Mary S. Keckler; Rachel Marine; Suxiang Tong; Yan Li; Ying Tao                                                                                                                                                                                                                                                                                                                                                                             |
| EPI_ISL_480862, EPI_ISL_508786, EPI_ISL_509724, EPI_ISL_512555, EPI_ISL_512564, EPI_ISL_514188, EPI_ISL_517875, EPI_ISL_568603, EPI_ISL_594313, EPI_ISL_653169                                                                                                                                                                                                                                                                                                                                                                                                                                                                                                                                                                                                                                                                                                                                                                                                                                                                                                                                                                                                                                                                                                                                                                                                                                  | see above | Florida Bureau of Public Health Laboratories                                                                                                | Florida Bureau of Public Health Laboratories                                                                                                                                  | Jason Blanton; Sarah Schmedes                                                                                                                                                                                                                                                                                                                                                                                                                                                                                                                                    |
| EPI_ISL_632010                                                                                                                                                                                                                                                                                                                                                                                                                                                                                                                                                                                                                                                                                                                                                                                                                                                                                                                                                                                                                                                                                                                                                                                                                                                                                                                                                                                  |           | Flushing Hospital Medical Center                                                                                                            | New York City Public Health Laboratory                                                                                                                                        | Jade Wang; et al.                                                                                                                                                                                                                                                                                                                                                                                                                                                                                                                                                |
| EPI_ISL_469040                                                                                                                                                                                                                                                                                                                                                                                                                                                                                                                                                                                                                                                                                                                                                                                                                                                                                                                                                                                                                                                                                                                                                                                                                                                                                                                                                                                  |           | GMERS Medical College & Hospital                                                                                                            | Gujarat Biotechnology Research Centre                                                                                                                                         | A M Kadri; Ankit Hinsu; Apurvashin Puvar; Chaitanya Joshi; Dinesh Kumar; Fenil Patel; Harsh Bakshi; Janvi Raval; Komal Patel; Labdhi Pandya; Madhvi Joshi; Maharshi Pandya; Meenakshi Shah; Monika Gandhi; Neena Doshi; Nidhi Patel; Nitin Savaliya; Pinal Trivedi; Pritesh Sabara; R D Dixit; Raghavendra Kumar; Snehal Bagatharia; Tejas Shah; Varsha Godbole; Zarna Patel; Zuber Saiyed                                                                                                                                                                       |
| EPI_ISL_582834                                                                                                                                                                                                                                                                                                                                                                                                                                                                                                                                                                                                                                                                                                                                                                                                                                                                                                                                                                                                                                                                                                                                                                                                                                                                                                                                                                                  |           | Gavle klinisk mikrobiologi                                                                                                                  | The Public Health Agency of Sweden                                                                                                                                            | Anna Risberg; Anna-Malin Linde; Karin Tegmark-Wisell; Maria Lind Karlberg; Mattias Haukland; Mia Brytting; Olov Svartstrom; Oskar Karlsson Lindsjö; Petra Edquist; Reza Advani; Sandra Brodrosson                                                                                                                                                                                                                                                                                                                                                                |
| EPI_ISL_747243                                                                                                                                                                                                                                                                                                                                                                                                                                                                                                                                                                                                                                                                                                                                                                                                                                                                                                                                                                                                                                                                                                                                                                                                                                                                                                                                                                                  |           | General Hospital Laboratory                                                                                                                 | Pathogen Laboratory (BSL3), Biomedical Innovation Department, Experimental and Applied Biology Division, Scientific Research Center and High Education from Ensenada (CICESE) | Cervantes-Luevano K.; Galindo C. and Licea-Navarro A.; Martinez M.A.; Saavedra-Flores A.                                                                                                                                                                                                                                                                                                                                                                                                                                                                         |
| EPI_ISL_746571, EPI_ISL_746824                                                                                                                                                                                                                                                                                                                                                                                                                                                                                                                                                                                                                                                                                                                                                                                                                                                                                                                                                                                                                                                                                                                                                                                                                                                                                                                                                                  |           | Genetica Molecular and Subdepartamento de Virologia ISP Chile                                                                               | Instituto de Salud Publica de Chile                                                                                                                                           | Andres Castillo; Barbara Parra; Gisselle Barra; Jaime Lagos; Javier Tognarelli; Jorge Fernandez; Loredana Arata; Patricia Bustos; Rodrigo Fasce                                                                                                                                                                                                                                                                                                                                                                                                                  |
| EPI_ISL_428368, EPI_ISL_480248                                                                                                                                                                                                                                                                                                                                                                                                                                                                                                                                                                                                                                                                                                                                                                                                                                                                                                                                                                                                                                                                                                                                                                                                                                                                                                                                                                  |           | Genomic Laboratory (GLAB) (Conjoint lab of Health Directorate of Istanbul and Istanbul Technical University)                                | Genomic Laboratory (GLAB), Istanbul Technical University                                                                                                                      | Arzu Irvem; Betsi Köse; Bugra Agaoglu; Elifnaz Çelik; Gizem Alkurt; Gizem Dinler Doganay; Ilker Karacan; Jale Yildiz; Levent Doganay; Mehtap Aydın; Ozlem Akgun Dogan; Tugba Kizilboga Akgun; Yasemin Kendir Demirkol                                                                                                                                                                                                                                                                                                                                            |
| EPI_ISL_1366326, EPI_ISL_1366327, EPI_ISL_1366328, EPI_ISL_1366329, EPI_ISL_1366330, EPI_ISL_1366331, EPI_ISL_1366332, EPI_ISL_1366333, EPI_ISL_1366334                                                                                                                                                                                                                                                                                                                                                                                                                                                                                                                                                                                                                                                                                                                                                                                                                                                                                                                                                                                                                                                                                                                                                                                                                                         | see above | Genomica Lab Molecular, Mexico                                                                                                              | Andersen lab at Scripps Research                                                                                                                                              | Jose Horacio Reyna Verdugo; Jose Roman Chavez Mendez; Luis Alberto Rangel Gonzalez; Martin Gonzalez Ibarra; SEARCH Alliance San Diego with Jonathan Gonzalez Garcia                                                                                                                                                                                                                                                                                                                                                                                              |
| EPI_ISL_730197, EPI_ISL_730198, EPI_ISL_730199, EPI_ISL_730200, EPI_ISL_730201, EPI_ISL_730202, EPI_ISL_730203, EPI_ISL_730204, EPI_ISL_730205, EPI_ISL_730206, EPI_ISL_730207, EPI_ISL_730208, EPI_ISL_730209, EPI_ISL_730210, EPI_ISL_730211, EPI_ISL_730212, EPI_ISL_730213, EPI_ISL_730214, EPI_ISL_730215, EPI_ISL_730216, EPI_ISL_730217, EPI_ISL_730218, EPI_ISL_730219, EPI_ISL_730220, EPI_ISL_730221, EPI_ISL_730222, EPI_ISL_730223, EPI_ISL_730224, EPI_ISL_730225, EPI_ISL_730226, EPI_ISL_730227, EPI_ISL_730228, EPI_ISL_1081425, EPI_ISL_1081426, EPI_ISL_1081427, EPI_ISL_1081428, EPI_ISL_1081430, EPI_ISL_1081431, EPI_ISL_1081432, EPI_ISL_1081433, EPI_ISL_1081434, EPI_ISL_1081435, EPI_ISL_1081436, EPI_ISL_1081437, EPI_ISL_1081438, EPI_ISL_1081439, EPI_ISL_1081440, EPI_ISL_1081441, EPI_ISL_1081442, EPI_ISL_1081443, EPI_ISL_1081444, EPI_ISL_1081445, EPI_ISL_1081446, EPI_ISL_1081447, EPI_ISL_1081448, EPI_ISL_1081449, EPI_ISL_1081450, EPI_ISL_1081451, EPI_ISL_1081452, EPI_ISL_1081453, EPI_ISL_1081454, EPI_ISL_1081455, EPI_ISL_1081456, EPI_ISL_1081473, EPI_ISL_1081474, EPI_ISL_1081475, EPI_ISL_1081476, EPI_ISL_1081477, EPI_ISL_1081478, EPI_ISL_1081479, EPI_ISL_1081480, EPI_ISL_1081485, EPI_ISL_1081486, EPI_ISL_1081487, EPI_ISL_1081488, EPI_ISL_1081490, EPI_ISL_1081491, EPI_ISL_1081492, EPI_ISL_1081493, EPI_ISL_1081494, EPI_ISL_1081495 | see above | Genomica Lab Molecular, M/éxico                                                                                                             | Andersen lab at Scripps Research                                                                                                                                              | Jose Horacio Reyna Verdugo; Jose Roman Chavez Mendez; Luis Alberto Rangel Gonzalez; Martin Gonzalez Ibarra; SEARCH Alliance San Diego with Jonathan Gonzalez Garcia                                                                                                                                                                                                                                                                                                                                                                                              |
| EPI_ISL_461478                                                                                                                                                                                                                                                                                                                                                                                                                                                                                                                                                                                                                                                                                                                                                                                                                                                                                                                                                                                                                                                                                                                                                                                                                                                                                                                                                                                  |           | Government Medical College, Vadodara                                                                                                        | Gujarat Biotechnology Research Centre                                                                                                                                         | ; A M Kadri; Ankit Hinsu; Apurvashin Puvar; Chaitanya Joshi; Dinesh Kumar; Fenil Patel; Harsh Bakshi; Janvi Raval; Komal Patel; Labdhi Pandya; Madhvi Joshi; Maharshi Pandya; Meenakshi Shah; Monika Gandhi; Nidhi Patel; Nitin Savaliya; Pinal Trivedi; Pritesh Sabara; R D Dixit; R N Daveswar; Raghavendra Kumar; Snehal Bagatharia; Tanuja Javadekar; Tejas Shah; Zarna Patel; Zuber Saiyed                                                                                                                                                                  |
| EPI_ISL_698244, EPI_ISL_698610, EPI_ISL_699142                                                                                                                                                                                                                                                                                                                                                                                                                                                                                                                                                                                                                                                                                                                                                                                                                                                                                                                                                                                                                                                                                                                                                                                                                                                                                                                                                  |           | Group 42 (G42) Healthcare, Abu Dhabi, United Arab Emirates; Department of Health, The United Arab Emirates                                  | G42 Healthcare                                                                                                                                                                | Ashish Koshy; Budoor Alqarni; Denghui Liu; Feng Chen; Hanif Khalak; Huanning Yang; Javier Quilez; Jian Wang; Junhua Li; Ke Liang; Long Lin; Mohammed Saifuddin Fasihuddin; Nan Qiao; Nawal Ahmed Mohamed Al Kaabi; Pauline Ogorodski; Pei Wu; Peng Xiao; Pengjuan Liu; Rong Liu; Sally Mahmood; Siyang Liu; Stephen S. Francis; Tao Ma; Vinay Kusuma; Walid Abbas Zaher; Webin Liu; Wenjun He; Xavier Anton; Xin Jin; Xin Meng; Xinyu Huang; Xun Xu; Zhaorong Yuan                                                                                               |
| EPI_ISL_435056                                                                                                                                                                                                                                                                                                                                                                                                                                                                                                                                                                                                                                                                                                                                                                                                                                                                                                                                                                                                                                                                                                                                                                                                                                                                                                                                                                                  |           | Gujarat Biotechnology Research Centre                                                                                                       | Gujarat Biotechnology Research Centre                                                                                                                                         | Afzal Ansari; Akanksha Verma; Amit Kanani; Ankit Hinsu; Apurvashin Puvar; Bhavesh Modi; Binita Aring; Chaitanya Joshi; Dinesh Kumar; Dipa Kinariwala; Disha Patel; Gaurishankar Shrimali; Geeta Vaghela; Janvi Raval; Kairavi Joshi; Kamlesh J Upadhyay; Madhvi Joshi; Maharshi Pandya; Monika Gandhi; Nidhi Sood; Nitin Savaliya; Pinal Trivedi; Pranay Shah; Pritesh Sabara; R D Dixit; Raghavendra Kumar; Ramesh Pandit; Snehal Bagatharia; Sonia Barve; Tejas Shah; Zuber Saiyed                                                                             |
| EPI_ISL_422462, EPI_ISL_547628                                                                                                                                                                                                                                                                                                                                                                                                                                                                                                                                                                                                                                                                                                                                                                                                                                                                                                                                                                                                                                                                                                                                                                                                                                                                                                                                                                  |           | Gundersen Molecular Diagnostics Laboratory                                                                                                  | Kabara Cancer Research Institute                                                                                                                                              | Craig S. Richmond; Paric A. Kenny                                                                                                                                                                                                                                                                                                                                                                                                                                                                                                                                |
| EPI_ISL_596363                                                                                                                                                                                                                                                                                                                                                                                                                                                                                                                                                                                                                                                                                                                                                                                                                                                                                                                                                                                                                                                                                                                                                                                                                                                                                                                                                                                  |           | HELIX LCC                                                                                                                                   | WHO National Influenza Centre Russian Federation                                                                                                                              | Andrey Komissarov; Anna Ivanova; Artem Fadeev; Daria Danilenko; Dmitry Bazhenov; Kseniya Komissarova                                                                                                                                                                                                                                                                                                                                                                                                                                                             |
| EPI_ISL_445349                                                                                                                                                                                                                                                                                                                                                                                                                                                                                                                                                                                                                                                                                                                                                                                                                                                                                                                                                                                                                                                                                                                                                                                                                                                                                                                                                                                  |           | HOSPITAL SAN JUAN DE DIOS                                                                                                                   | Instituto de Salud Publica de Chile                                                                                                                                           | Alejandra Acevedo; Andrés E Castillo; Bárbara Parra; Carolina Tambley; Gabriel Leal; Jaime Lagos; Jorge Fernandez; Loredana Arata; Patricia Bustos; Paz Tapia; Rodrigo Fasce; Winston Andrade                                                                                                                                                                                                                                                                                                                                                                    |
| EPI_ISL_418244                                                                                                                                                                                                                                                                                                                                                                                                                                                                                                                                                                                                                                                                                                                                                                                                                                                                                                                                                                                                                                                                                                                                                                                                                                                                                                                                                                                  |           | HOSPITAL UNIVERSITARIO VIRGEN DE LAS NIEVES                                                                                                 | Instituto de Salud Carlos III                                                                                                                                                 | A. Monzón; F. Casas; I. Jiménez; S. Sanbonmatsu S.; Iglesias-Caballero; M. Camarero; M. Cuesta; M. González-Esguevillas; M. Molinero Calamita; M. Zaballos; P. Jiménez; S. Juliá; S. Pozo; S. Varona                                                                                                                                                                                                                                                                                                                                                             |
| EPI_ISL_640082                                                                                                                                                                                                                                                                                                                                                                                                                                                                                                                                                                                                                                                                                                                                                                                                                                                                                                                                                                                                                                                                                                                                                                                                                                                                                                                                                                                  |           | Heideveld Emergency Centre                                                                                                                  | NHLS/UCT                                                                                                                                                                      | Arash Iranzadeh; Bruna Galvao; Carolyn Williamson; Deelan Doolabh; Diana Hardie; Innocent Mudau; Kruger Marais; Lynn Tyers; Marvin Hsiao; Stephen Korsman                                                                                                                                                                                                                                                                                                                                                                                                        |
| EPI_ISL_700168                                                                                                                                                                                                                                                                                                                                                                                                                                                                                                                                                                                                                                                                                                                                                                                                                                                                                                                                                                                                                                                                                                                                                                                                                                                                                                                                                                                  |           | Hematopathology Laboratory, ACTREC, TMC                                                                                                     | Hematopathology Laboratory, ACTREC, TMC                                                                                                                                       | ACTREC; Hematopathology Laboratory                                                                                                                                                                                                                                                                                                                                                                                                                                                                                                                               |
| EPI_ISL_462479                                                                                                                                                                                                                                                                                                                                                                                                                                                                                                                                                                                                                                                                                                                                                                                                                                                                                                                                                                                                                                                                                                                                                                                                                                                                                                                                                                                  |           | Hospital Clinic                                                                                                                             | Instituto de Salud Carlos III                                                                                                                                                 | A. Monzón; F. Casas; I. J. Jiménez; Iglesias-Caballero; M. Camarero; M. Cuesta; M. González-Esguevillas; M. Molinero Calamita; M. Zaballos; M.A Marcos; P. Jiménez; S. Juliá; S. Pozo; S. Varona                                                                                                                                                                                                                                                                                                                                                                 |
| EPI_ISL_1120614                                                                                                                                                                                                                                                                                                                                                                                                                                                                                                                                                                                                                                                                                                                                                                                                                                                                                                                                                                                                                                                                                                                                                                                                                                                                                                                                                                                 |           | Hospital Margarita Maza de Juarez                                                                                                           | CIAD LDM-LGM                                                                                                                                                                  | Bruno Gome-Gil; Julissa Enciso-Ibarra                                                                                                                                                                                                                                                                                                                                                                                                                                                                                                                            |
| EPI_ISL_1482628                                                                                                                                                                                                                                                                                                                                                                                                                                                                                                                                                                                                                                                                                                                                                                                                                                                                                                                                                                                                                                                                                                                                                                                                                                                                                                                                                                                 |           | Hospital Margarita Maza de Juárez                                                                                                           | Microbial Genomics Laboratory                                                                                                                                                 | Alejandra Garcia-Gasca; Bruno Gomez-Gil; Daniel Fregoso-Rueda; Julissa Enciso-Ibarra                                                                                                                                                                                                                                                                                                                                                                                                                                                                             |

|                                                                                                                                                                                                                                                                                                                                                                                                                                                                                                                                                                                                                                                                                                                                                                                                                                                                                                                                                                                                                                                                                                                                                                                                                                                                                                                                                                                                                                                                                                                                                                                                                                                                                                                                                                                                                                                                                                                                                                                                                                                                                                                                                                                                                                                                                                                                                                                                                                                                                                                                                                                                                                                                                                                                                                                                                                                                                                                                                                                                                                                                                                                                                                                                 |                                                                                                                                |                                                                                                                                |                                                                                                                                                                                                                                                                                                                                                                                                                                                                                                                                                                                                                                                                                                                                                                                                             |
|-------------------------------------------------------------------------------------------------------------------------------------------------------------------------------------------------------------------------------------------------------------------------------------------------------------------------------------------------------------------------------------------------------------------------------------------------------------------------------------------------------------------------------------------------------------------------------------------------------------------------------------------------------------------------------------------------------------------------------------------------------------------------------------------------------------------------------------------------------------------------------------------------------------------------------------------------------------------------------------------------------------------------------------------------------------------------------------------------------------------------------------------------------------------------------------------------------------------------------------------------------------------------------------------------------------------------------------------------------------------------------------------------------------------------------------------------------------------------------------------------------------------------------------------------------------------------------------------------------------------------------------------------------------------------------------------------------------------------------------------------------------------------------------------------------------------------------------------------------------------------------------------------------------------------------------------------------------------------------------------------------------------------------------------------------------------------------------------------------------------------------------------------------------------------------------------------------------------------------------------------------------------------------------------------------------------------------------------------------------------------------------------------------------------------------------------------------------------------------------------------------------------------------------------------------------------------------------------------------------------------------------------------------------------------------------------------------------------------------------------------------------------------------------------------------------------------------------------------------------------------------------------------------------------------------------------------------------------------------------------------------------------------------------------------------------------------------------------------------------------------------------------------------------------------------------------------|--------------------------------------------------------------------------------------------------------------------------------|--------------------------------------------------------------------------------------------------------------------------------|-------------------------------------------------------------------------------------------------------------------------------------------------------------------------------------------------------------------------------------------------------------------------------------------------------------------------------------------------------------------------------------------------------------------------------------------------------------------------------------------------------------------------------------------------------------------------------------------------------------------------------------------------------------------------------------------------------------------------------------------------------------------------------------------------------------|
| EPI_ISL_468315, EPI_ISL_515546                                                                                                                                                                                                                                                                                                                                                                                                                                                                                                                                                                                                                                                                                                                                                                                                                                                                                                                                                                                                                                                                                                                                                                                                                                                                                                                                                                                                                                                                                                                                                                                                                                                                                                                                                                                                                                                                                                                                                                                                                                                                                                                                                                                                                                                                                                                                                                                                                                                                                                                                                                                                                                                                                                                                                                                                                                                                                                                                                                                                                                                                                                                                                                  | Hospital Municipal do Tatuape Carmino Carichio                                                                                 | Instituto Adolfo Lutz, Interdisciplinary Procedures Center, Strategic Laboratory                                               | Claudia Regina Gonçalves; Claudio Tavares Sacchi; Erica Valessa Ramos Gomes                                                                                                                                                                                                                                                                                                                                                                                                                                                                                                                                                                                                                                                                                                                                 |
| EPI_ISL_523956                                                                                                                                                                                                                                                                                                                                                                                                                                                                                                                                                                                                                                                                                                                                                                                                                                                                                                                                                                                                                                                                                                                                                                                                                                                                                                                                                                                                                                                                                                                                                                                                                                                                                                                                                                                                                                                                                                                                                                                                                                                                                                                                                                                                                                                                                                                                                                                                                                                                                                                                                                                                                                                                                                                                                                                                                                                                                                                                                                                                                                                                                                                                                                                  | Hospital Regional de Assis                                                                                                     | Instituto Adolfo Lutz, Interdisciplinary Procedures Center, Strategic Laboratory                                               | Claudia Regina Gonçalves; Claudio Tavares Sacchi; Erica Valessa Ramos Gomes                                                                                                                                                                                                                                                                                                                                                                                                                                                                                                                                                                                                                                                                                                                                 |
| EPI_ISL_491438                                                                                                                                                                                                                                                                                                                                                                                                                                                                                                                                                                                                                                                                                                                                                                                                                                                                                                                                                                                                                                                                                                                                                                                                                                                                                                                                                                                                                                                                                                                                                                                                                                                                                                                                                                                                                                                                                                                                                                                                                                                                                                                                                                                                                                                                                                                                                                                                                                                                                                                                                                                                                                                                                                                                                                                                                                                                                                                                                                                                                                                                                                                                                                                  | Hospital San Rafael de Alajuela                                                                                                | Incienza, Instituto Costarricense de Investigación y Enseñanza en Nutrición y Salud                                            | Adriana Godínez & Melany Calderon; Claudio Soto-Garita; Estela Cordero; Francisco Duarte; Hebleen Brenes                                                                                                                                                                                                                                                                                                                                                                                                                                                                                                                                                                                                                                                                                                    |
| EPI_ISL_1482627, EPI_ISL_1491363, EPI_ISL_1491364, EPI_ISL_1491365, EPI_ISL_1627079, EPI_ISL_1660616                                                                                                                                                                                                                                                                                                                                                                                                                                                                                                                                                                                                                                                                                                                                                                                                                                                                                                                                                                                                                                                                                                                                                                                                                                                                                                                                                                                                                                                                                                                                                                                                                                                                                                                                                                                                                                                                                                                                                                                                                                                                                                                                                                                                                                                                                                                                                                                                                                                                                                                                                                                                                                                                                                                                                                                                                                                                                                                                                                                                                                                                                            | Hospital Sharp                                                                                                                 | Microbial Genomics Laboratory                                                                                                  | Alejandra Garcia-Gasca; Bruno Gomez-Gil; Daniel Fregoso-Rueda; Julissa Enciso-Ibarra                                                                                                                                                                                                                                                                                                                                                                                                                                                                                                                                                                                                                                                                                                                        |
| EPI_ISL_428683, EPI_ISL_529992                                                                                                                                                                                                                                                                                                                                                                                                                                                                                                                                                                                                                                                                                                                                                                                                                                                                                                                                                                                                                                                                                                                                                                                                                                                                                                                                                                                                                                                                                                                                                                                                                                                                                                                                                                                                                                                                                                                                                                                                                                                                                                                                                                                                                                                                                                                                                                                                                                                                                                                                                                                                                                                                                                                                                                                                                                                                                                                                                                                                                                                                                                                                                                  | Hospital Universitario 12 de Octubre                                                                                           | Hospital Universitario 12 de Octubre                                                                                           | Elias Dahdouh; Esther Viedma; Fernando Lázaro; Jesús Mingorance; Juan Carlos Galán; Julio García; Mª Dolores Folgueira; Natalia Stella; Rafael Cantón; Rafael Delgado; Raúl Recio; Sara González                                                                                                                                                                                                                                                                                                                                                                                                                                                                                                                                                                                                            |
| EPI_ISL_467179                                                                                                                                                                                                                                                                                                                                                                                                                                                                                                                                                                                                                                                                                                                                                                                                                                                                                                                                                                                                                                                                                                                                                                                                                                                                                                                                                                                                                                                                                                                                                                                                                                                                                                                                                                                                                                                                                                                                                                                                                                                                                                                                                                                                                                                                                                                                                                                                                                                                                                                                                                                                                                                                                                                                                                                                                                                                                                                                                                                                                                                                                                                                                                                  | Hospital Universitario Araba. Vitoria-Gasteiz                                                                                  | SeqCOVID-SPAIN consortium/IBV(CSIC)                                                                                            | Amaitz Aguirre Quiñonero; Andrés Canut Blasco. and SeqCOVID-SPAIN consortium; Carmen Gómez González; Marina Fernández Torres; Mª Concepción Lecaroz Agara; Mª Rosario Almela Ferrer; Silvia Hernáez Crespo                                                                                                                                                                                                                                                                                                                                                                                                                                                                                                                                                                                                  |
| EPI_ISL_428679                                                                                                                                                                                                                                                                                                                                                                                                                                                                                                                                                                                                                                                                                                                                                                                                                                                                                                                                                                                                                                                                                                                                                                                                                                                                                                                                                                                                                                                                                                                                                                                                                                                                                                                                                                                                                                                                                                                                                                                                                                                                                                                                                                                                                                                                                                                                                                                                                                                                                                                                                                                                                                                                                                                                                                                                                                                                                                                                                                                                                                                                                                                                                                                  | Hospital Universitario La Paz                                                                                                  | Hospital Universitario 12 de Octubre                                                                                           | Elias Dahdouh; Esther Viedma; Fernando Lázaro; Jesús Mingorance; Juan Carlos Galán; Julio García; Mª Dolores Folgueira; Natalia Stella; Rafael Cantón; Rafael Delgado; Raúl Recio; Sara González                                                                                                                                                                                                                                                                                                                                                                                                                                                                                                                                                                                                            |
| EPI_ISL_530106                                                                                                                                                                                                                                                                                                                                                                                                                                                                                                                                                                                                                                                                                                                                                                                                                                                                                                                                                                                                                                                                                                                                                                                                                                                                                                                                                                                                                                                                                                                                                                                                                                                                                                                                                                                                                                                                                                                                                                                                                                                                                                                                                                                                                                                                                                                                                                                                                                                                                                                                                                                                                                                                                                                                                                                                                                                                                                                                                                                                                                                                                                                                                                                  | Hospital Universitario Ramón y Cajal                                                                                           | Hospital Universitario La Paz                                                                                                  | Elias Dahdouh; Esther Viedma; Fernando Lázaro; Jesús Mingorance; Juan Carlos Galán; Julio García; Mª Dolores Folgueira; Natalia Stella; Rafael Cantón; Rafael Delgado; Raúl Recio; Sara González                                                                                                                                                                                                                                                                                                                                                                                                                                                                                                                                                                                                            |
| EPI_ISL_474851                                                                                                                                                                                                                                                                                                                                                                                                                                                                                                                                                                                                                                                                                                                                                                                                                                                                                                                                                                                                                                                                                                                                                                                                                                                                                                                                                                                                                                                                                                                                                                                                                                                                                                                                                                                                                                                                                                                                                                                                                                                                                                                                                                                                                                                                                                                                                                                                                                                                                                                                                                                                                                                                                                                                                                                                                                                                                                                                                                                                                                                                                                                                                                                  | Hospital Universitario Virgen de las Nieves de Granada-SAS                                                                     | SeqCOVID-SPAIN consortium/IBV(CSIC)                                                                                            | Irene Pedrosa Corral; José M. Navarro-Marí and SeqCOVID-SPAIN consortium; Mercedes Pérez Ruiz; Sara Sanbonmatsu Gámez                                                                                                                                                                                                                                                                                                                                                                                                                                                                                                                                                                                                                                                                                       |
| EPI_ISL_434772, EPI_ISL_542539, EPI_ISL_542719, EPI_ISL_542813, EPI_ISL_542815, EPI_ISL_542893, EPI_ISL_542915, EPI_ISL_543155, EPI_ISL_544842, EPI_ISL_545081, EPI_ISL_545087, EPI_ISL_545168, EPI_ISL_545169, EPI_ISL_545216, EPI_ISL_545303, EPI_ISL_545446, EPI_ISL_546191                                                                                                                                                                                                                                                                                                                                                                                                                                                                                                                                                                                                                                                                                                                                                                                                                                                                                                                                                                                                                                                                                                                                                                                                                                                                                                                                                                                                                                                                                                                                                                                                                                                                                                                                                                                                                                                                                                                                                                                                                                                                                                                                                                                                                                                                                                                                                                                                                                                                                                                                                                                                                                                                                                                                                                                                                                                                                                                  | see above                                                                                                                      | Houston Methodist Hospital                                                                                                     | Chia-Wei Chou; Concepcion C. Cantu; Daniel Boutz; David W. Bernard; Ghazaleh Eskandari; Hakon Jonsson; Heather Hendrickson; Hoang A. T. Nguyen; Hung-Che Kuo; Ilya J. Finkelstein; J. Hunter Long; James J. Davis; Jason S. McLellan; Jimmy Gollihar; Jule Goike; Kamyab Javanmardi; Kari Stefansson; Layne Pruitt; Marcus Nguyen; Matthew Ojeda Saavedra; Maulik Shukla; Muthiah Kumaraswami; Paul A. Christensen; Prasanti Yerramilli; Randall J. Olsen; S. Wesley Long; Sishir Subedi; and James M. Musser                                                                                                                                                                                                                                                                                               |
| EPI_ISL_645018, EPI_ISL_645047                                                                                                                                                                                                                                                                                                                                                                                                                                                                                                                                                                                                                                                                                                                                                                                                                                                                                                                                                                                                                                                                                                                                                                                                                                                                                                                                                                                                                                                                                                                                                                                                                                                                                                                                                                                                                                                                                                                                                                                                                                                                                                                                                                                                                                                                                                                                                                                                                                                                                                                                                                                                                                                                                                                                                                                                                                                                                                                                                                                                                                                                                                                                                                  | Human Genome Variation Research Group, Malopolska Centre of Biotechnology                                                      | Human Genome Variation Research Group, Malopolska Centre of Biotechnology                                                      | Botwina, P.; Branicki, W.; Dabrowska, A.; Foremny, J.; Gromowski, T.; Klajmon, A.; Kopera, K.; Kowalski, M.; Labaj; Marszalek, K.; Owczarek, K.; P.P.; Pisarek, A.; Pospiech, E.; Pirc, K.; Sanak, M.; Swadzba, J.; Szczepanski, A.                                                                                                                                                                                                                                                                                                                                                                                                                                                                                                                                                                         |
| EPI_ISL_526215                                                                                                                                                                                                                                                                                                                                                                                                                                                                                                                                                                                                                                                                                                                                                                                                                                                                                                                                                                                                                                                                                                                                                                                                                                                                                                                                                                                                                                                                                                                                                                                                                                                                                                                                                                                                                                                                                                                                                                                                                                                                                                                                                                                                                                                                                                                                                                                                                                                                                                                                                                                                                                                                                                                                                                                                                                                                                                                                                                                                                                                                                                                                                                                  | Hungarian Defence Forces Military Medical Centre                                                                               | National Laboratory of Virology, Szentágotthai Research Centre                                                                 | Balázs Somogyi; Bálint Eszenyi; Endre Gábor Tóth; Ferenc Jakab; Gábor Kemeneši                                                                                                                                                                                                                                                                                                                                                                                                                                                                                                                                                                                                                                                                                                                              |
| EPI_ISL_536340                                                                                                                                                                                                                                                                                                                                                                                                                                                                                                                                                                                                                                                                                                                                                                                                                                                                                                                                                                                                                                                                                                                                                                                                                                                                                                                                                                                                                                                                                                                                                                                                                                                                                                                                                                                                                                                                                                                                                                                                                                                                                                                                                                                                                                                                                                                                                                                                                                                                                                                                                                                                                                                                                                                                                                                                                                                                                                                                                                                                                                                                                                                                                                                  | Hôpital Charles-LeMoine                                                                                                        | Laboratoire de santé publique du Québec                                                                                        | Guillaume Bourque; Ioannis Ragoussis; Jesse Shapiro; Mark Lathrop and Michel Roger on behalf of the CoVSeQ research group; Sandrine Moreira                                                                                                                                                                                                                                                                                                                                                                                                                                                                                                                                                                                                                                                                 |
| EPI_ISL_536208, EPI_ISL_536230                                                                                                                                                                                                                                                                                                                                                                                                                                                                                                                                                                                                                                                                                                                                                                                                                                                                                                                                                                                                                                                                                                                                                                                                                                                                                                                                                                                                                                                                                                                                                                                                                                                                                                                                                                                                                                                                                                                                                                                                                                                                                                                                                                                                                                                                                                                                                                                                                                                                                                                                                                                                                                                                                                                                                                                                                                                                                                                                                                                                                                                                                                                                                                  | Hôpital de Hull                                                                                                                | Laboratoire de santé publique du Québec                                                                                        | Guillaume Bourque; Ioannis Ragoussis; Jesse Shapiro; Mark Lathrop and Michel Roger on behalf of the CoVSeQ research group; Sandrine Moreira                                                                                                                                                                                                                                                                                                                                                                                                                                                                                                                                                                                                                                                                 |
| EPI_ISL_535744                                                                                                                                                                                                                                                                                                                                                                                                                                                                                                                                                                                                                                                                                                                                                                                                                                                                                                                                                                                                                                                                                                                                                                                                                                                                                                                                                                                                                                                                                                                                                                                                                                                                                                                                                                                                                                                                                                                                                                                                                                                                                                                                                                                                                                                                                                                                                                                                                                                                                                                                                                                                                                                                                                                                                                                                                                                                                                                                                                                                                                                                                                                                                                                  | Hôpital de Lasalle                                                                                                             | Laboratoire de santé publique du Québec                                                                                        | Guillaume Bourque; Ioannis Ragoussis; Jesse Shapiro; Mark Lathrop and Michel Roger; Sandrine Moreira                                                                                                                                                                                                                                                                                                                                                                                                                                                                                                                                                                                                                                                                                                        |
| EPI_ISL_455640                                                                                                                                                                                                                                                                                                                                                                                                                                                                                                                                                                                                                                                                                                                                                                                                                                                                                                                                                                                                                                                                                                                                                                                                                                                                                                                                                                                                                                                                                                                                                                                                                                                                                                                                                                                                                                                                                                                                                                                                                                                                                                                                                                                                                                                                                                                                                                                                                                                                                                                                                                                                                                                                                                                                                                                                                                                                                                                                                                                                                                                                                                                                                                                  | ICMR-National Institute of Cholera and Enteric Diseases                                                                        | National Institute of Biomedical Genomics                                                                                      | Ananya Chatterjee; Arindam Maitra; Hasina Banu; Mamta Chawla Sarkar; Saumitra Das; Shanta Dutta; Sreedhar Chinnaswamy                                                                                                                                                                                                                                                                                                                                                                                                                                                                                                                                                                                                                                                                                       |
| EPI_ISL_410045                                                                                                                                                                                                                                                                                                                                                                                                                                                                                                                                                                                                                                                                                                                                                                                                                                                                                                                                                                                                                                                                                                                                                                                                                                                                                                                                                                                                                                                                                                                                                                                                                                                                                                                                                                                                                                                                                                                                                                                                                                                                                                                                                                                                                                                                                                                                                                                                                                                                                                                                                                                                                                                                                                                                                                                                                                                                                                                                                                                                                                                                                                                                                                                  | IL Department of Public Health Chicago Laboratory                                                                              | Pathogen Discovery, Respiratory Viruses Branch, Division of Viral Diseases, Centers for Diseases Control and Prevention        | Anna Uehara; Brett L. Whitaker; Brian Lynch; Clinton R. Paden; Janna' R. Murray; Jing Zhang; Krista Queen; Lijuan Wang; Senthil Kumar K. Sakthivel; Shifaq Kamili; Stephen Lindstrom; Susan I. Gerber; Suxiang Tong; Xiaoyan Lu; Yan Li; Ying Tao                                                                                                                                                                                                                                                                                                                                                                                                                                                                                                                                                           |
| EPI_ISL_424850                                                                                                                                                                                                                                                                                                                                                                                                                                                                                                                                                                                                                                                                                                                                                                                                                                                                                                                                                                                                                                                                                                                                                                                                                                                                                                                                                                                                                                                                                                                                                                                                                                                                                                                                                                                                                                                                                                                                                                                                                                                                                                                                                                                                                                                                                                                                                                                                                                                                                                                                                                                                                                                                                                                                                                                                                                                                                                                                                                                                                                                                                                                                                                                  | IL Department of Public Health Chicago Laboratory                                                                              | Pathogen Discovery, Respiratory Viruses Branch, Division of Viral Diseases, Centers for Disease Control and Prevention         | Alison S. Lauffer Halpin; Anna Uehara; Christopher A. Elkins; Clinton R. Paden; Halbin Wang; Jing Zhang; Krista Queen; Mary S. Keckler; Rachel Marine; Suxiang Tong; Yan Li; Ying Tao                                                                                                                                                                                                                                                                                                                                                                                                                                                                                                                                                                                                                       |
| EPI_ISL_1340629                                                                                                                                                                                                                                                                                                                                                                                                                                                                                                                                                                                                                                                                                                                                                                                                                                                                                                                                                                                                                                                                                                                                                                                                                                                                                                                                                                                                                                                                                                                                                                                                                                                                                                                                                                                                                                                                                                                                                                                                                                                                                                                                                                                                                                                                                                                                                                                                                                                                                                                                                                                                                                                                                                                                                                                                                                                                                                                                                                                                                                                                                                                                                                                 | INER                                                                                                                           | Instituto de Diagnostico y Referencia Epidemiologicos (INDRE)                                                                  | Abril Rodríguez-Maldonado; Ariadna Medina-Benitez; Claudia Wong-Arambula; Ernesto Ramirez-Gonzalez.; Gisela Barrera-Badillo; Irma Lopez-Martinez; Joaquin Quiroz-Mercado; Lucia Hernandez-Rivas; Natividad Cruz-Ortiz; Sergio Rangel-Guerrero; Tatiana Nunez-Garcia; Vanessa Rivero-Arredondo                                                                                                                                                                                                                                                                                                                                                                                                                                                                                                               |
| EPI_ISL_493330                                                                                                                                                                                                                                                                                                                                                                                                                                                                                                                                                                                                                                                                                                                                                                                                                                                                                                                                                                                                                                                                                                                                                                                                                                                                                                                                                                                                                                                                                                                                                                                                                                                                                                                                                                                                                                                                                                                                                                                                                                                                                                                                                                                                                                                                                                                                                                                                                                                                                                                                                                                                                                                                                                                                                                                                                                                                                                                                                                                                                                                                                                                                                                                  | INMI Lazzaro Spallanzani IRCCS                                                                                                 | INMI Lazzaro Spallanzani IRCCS                                                                                                 | Antonino Di Caro; Barbara Bartolini; Cesare E.M. Gruber; Francesco Messina; Maria R. Capobianchi; Martina Rueca                                                                                                                                                                                                                                                                                                                                                                                                                                                                                                                                                                                                                                                                                             |
| EPI_ISL_751353, EPI_ISL_751355, EPI_ISL_751360                                                                                                                                                                                                                                                                                                                                                                                                                                                                                                                                                                                                                                                                                                                                                                                                                                                                                                                                                                                                                                                                                                                                                                                                                                                                                                                                                                                                                                                                                                                                                                                                                                                                                                                                                                                                                                                                                                                                                                                                                                                                                                                                                                                                                                                                                                                                                                                                                                                                                                                                                                                                                                                                                                                                                                                                                                                                                                                                                                                                                                                                                                                                                  | IRCCS Sacro Cuore Don Calabria Hospital, Department of Infectious, Tropical Diseases & Microbiology                            | University of Verona, Department of Biotechnology                                                                              | Antonio Mori; Chiara Degli Esposti; Chiara Piubelli; Cristina Beltrami; Elena Pomari; Emanuela Cosentino; Giulia Lopatriello; Luca Marcolungo; Massimo Delledonne; Michela Deiana                                                                                                                                                                                                                                                                                                                                                                                                                                                                                                                                                                                                                           |
| EPI_ISL_1502814, EPI_ISL_1502815, EPI_ISL_1502816, EPI_ISL_1502817, EPI_ISL_1503143                                                                                                                                                                                                                                                                                                                                                                                                                                                                                                                                                                                                                                                                                                                                                                                                                                                                                                                                                                                                                                                                                                                                                                                                                                                                                                                                                                                                                                                                                                                                                                                                                                                                                                                                                                                                                                                                                                                                                                                                                                                                                                                                                                                                                                                                                                                                                                                                                                                                                                                                                                                                                                                                                                                                                                                                                                                                                                                                                                                                                                                                                                             | Infectious Diseases Department , Instituto Nacional de Ciencias Medicas y Nutrición                                            | Instituto Nacional de Ciencias Medicas y Nutricion Infectious Diseases                                                         | Diana Paola Davalos Martinez; Fernando Arteaga Cabello; Fernando Ledesma Barrientos; Guillermo M. Ruiz-Palacios; Luis Alberto Garcia Andrade; Luz Elena Cervantes Villar; Miriam Arciniega Fuentes; Pilar Ramos Cervantes; Violeta Ibarra Gonzalez                                                                                                                                                                                                                                                                                                                                                                                                                                                                                                                                                          |
| EPI_ISL_496339, EPI_ISL_496340, EPI_ISL_496341, EPI_ISL_496342, EPI_ISL_496343, EPI_ISL_496344, EPI_ISL_496345, EPI_ISL_496346, EPI_ISL_496347, EPI_ISL_496348, EPI_ISL_496349, EPI_ISL_496350, EPI_ISL_496351, EPI_ISL_496352, EPI_ISL_496353, EPI_ISL_496354, EPI_ISL_496355, EPI_ISL_496356, EPI_ISL_496357, EPI_ISL_496358, EPI_ISL_496359, EPI_ISL_496360, EPI_ISL_496361, EPI_ISL_496362, EPI_ISL_496363, EPI_ISL_496364, EPI_ISL_496365, EPI_ISL_496366, EPI_ISL_496367, EPI_ISL_496368, EPI_ISL_496369, EPI_ISL_496370, EPI_ISL_496371, EPI_ISL_496372, EPI_ISL_496373, EPI_ISL_496374, EPI_ISL_496375, EPI_ISL_496376                                                                                                                                                                                                                                                                                                                                                                                                                                                                                                                                                                                                                                                                                                                                                                                                                                                                                                                                                                                                                                                                                                                                                                                                                                                                                                                                                                                                                                                                                                                                                                                                                                                                                                                                                                                                                                                                                                                                                                                                                                                                                                                                                                                                                                                                                                                                                                                                                                                                                                                                                                  | see above                                                                                                                      | Infecotab                                                                                                                      | Carlos A. Cota Haros; Octavio Renteria Pacheco; SEARCH Alliance San Diego with Samuel Navarro Alvarez                                                                                                                                                                                                                                                                                                                                                                                                                                                                                                                                                                                                                                                                                                       |
| EPI_ISL_418206, EPI_ISL_420078, EPI_ISL_481237                                                                                                                                                                                                                                                                                                                                                                                                                                                                                                                                                                                                                                                                                                                                                                                                                                                                                                                                                                                                                                                                                                                                                                                                                                                                                                                                                                                                                                                                                                                                                                                                                                                                                                                                                                                                                                                                                                                                                                                                                                                                                                                                                                                                                                                                                                                                                                                                                                                                                                                                                                                                                                                                                                                                                                                                                                                                                                                                                                                                                                                                                                                                                  | Institut Pasteur Dakar                                                                                                         | Andersen lab at Scripps Research Institut Pasteur de Dakar                                                                     | Amadou Alpha Sall; Amadou Alpha Sall.; Mamadou Malado Jallow; Marie Henriette Dior Ndiome; Moussa Moise Diagne; Ndongo Dia; Ousmane Faye; Safietou Sanke                                                                                                                                                                                                                                                                                                                                                                                                                                                                                                                                                                                                                                                    |
| EPI_ISL_490100                                                                                                                                                                                                                                                                                                                                                                                                                                                                                                                                                                                                                                                                                                                                                                                                                                                                                                                                                                                                                                                                                                                                                                                                                                                                                                                                                                                                                                                                                                                                                                                                                                                                                                                                                                                                                                                                                                                                                                                                                                                                                                                                                                                                                                                                                                                                                                                                                                                                                                                                                                                                                                                                                                                                                                                                                                                                                                                                                                                                                                                                                                                                                                                  | Institute for Medical Research, Infectious Disease Research Centre, National Institutes of Health, Ministry of Health Malaysia | Institute for Medical Research, Infectious Disease Research Centre, National Institutes of Health, Ministry of Health Malaysia | Kalyanasundram J; Kamel K; Mohd-Zawawi Z; Suppiah J; Thayan R                                                                                                                                                                                                                                                                                                                                                                                                                                                                                                                                                                                                                                                                                                                                               |
| EPI_ISL_602509, EPI_ISL_602518                                                                                                                                                                                                                                                                                                                                                                                                                                                                                                                                                                                                                                                                                                                                                                                                                                                                                                                                                                                                                                                                                                                                                                                                                                                                                                                                                                                                                                                                                                                                                                                                                                                                                                                                                                                                                                                                                                                                                                                                                                                                                                                                                                                                                                                                                                                                                                                                                                                                                                                                                                                                                                                                                                                                                                                                                                                                                                                                                                                                                                                                                                                                                                  | Institute for Virology, University Hospital Essen                                                                              | Center of Medical Microbiology, Virology, and Hospital Hygiene, University of Duesseldorf                                      | Alexander Diltthey; Andreas Walker; Daniel Strelow; Jessica Nicola; Jörg Timm; Klaus Pfeffer; Lisanna Hülse; Malte Kohns Vasconcelos; Maximilian Damagnez; Nadine Lübke; Olympia E. Anastasiou; Tobias Wienemann; Torsten Houwaart; Ulf Dittmer                                                                                                                                                                                                                                                                                                                                                                                                                                                                                                                                                             |
| EPI_ISL_723079                                                                                                                                                                                                                                                                                                                                                                                                                                                                                                                                                                                                                                                                                                                                                                                                                                                                                                                                                                                                                                                                                                                                                                                                                                                                                                                                                                                                                                                                                                                                                                                                                                                                                                                                                                                                                                                                                                                                                                                                                                                                                                                                                                                                                                                                                                                                                                                                                                                                                                                                                                                                                                                                                                                                                                                                                                                                                                                                                                                                                                                                                                                                                                                  | Institute of Medical Genetics and Applied Genomics                                                                             | Institute of Medical Genetics and Applied Genomics                                                                             | Angel Angelov; Caspar Gross; Daniela Bezdán; Michael Bitzer; Michael Sonnabend; Michaela Pogoda; Nicolas Casadei; Siri Göpel; Stephan Ossowski; Thomas Iftner; Tina Ganzennüller                                                                                                                                                                                                                                                                                                                                                                                                                                                                                                                                                                                                                            |
| EPI_ISL_635260                                                                                                                                                                                                                                                                                                                                                                                                                                                                                                                                                                                                                                                                                                                                                                                                                                                                                                                                                                                                                                                                                                                                                                                                                                                                                                                                                                                                                                                                                                                                                                                                                                                                                                                                                                                                                                                                                                                                                                                                                                                                                                                                                                                                                                                                                                                                                                                                                                                                                                                                                                                                                                                                                                                                                                                                                                                                                                                                                                                                                                                                                                                                                                                  | Institute of Microbiology and Immunology, Faculty of Medicine, University of Ljubljana                                         | Institute of Microbiology and Immunology, Faculty of Medicine, University of Ljubljana                                         | Mario Poljak; Miša Korva; Samo Zakotnik; Tatjana Avšič - Županc; Tomaž Mark Zorec                                                                                                                                                                                                                                                                                                                                                                                                                                                                                                                                                                                                                                                                                                                           |
| EPI_ISL_402123                                                                                                                                                                                                                                                                                                                                                                                                                                                                                                                                                                                                                                                                                                                                                                                                                                                                                                                                                                                                                                                                                                                                                                                                                                                                                                                                                                                                                                                                                                                                                                                                                                                                                                                                                                                                                                                                                                                                                                                                                                                                                                                                                                                                                                                                                                                                                                                                                                                                                                                                                                                                                                                                                                                                                                                                                                                                                                                                                                                                                                                                                                                                                                                  | Institute of Pathogen Biology, Chinese Academy of Medical Sciences & Peking Union Medical College                              | Institute of Pathogen Biology, Chinese Academy of Medical Sciences & Peking Union Medical College                              | Chao Wu; Jianwei Wang; Lili Ren; Qi Jin; Yiwei Liu; Zhiqiang Wu; Zichun Xiang                                                                                                                                                                                                                                                                                                                                                                                                                                                                                                                                                                                                                                                                                                                               |
| EPI_ISL_508338, EPI_ISL_508385                                                                                                                                                                                                                                                                                                                                                                                                                                                                                                                                                                                                                                                                                                                                                                                                                                                                                                                                                                                                                                                                                                                                                                                                                                                                                                                                                                                                                                                                                                                                                                                                                                                                                                                                                                                                                                                                                                                                                                                                                                                                                                                                                                                                                                                                                                                                                                                                                                                                                                                                                                                                                                                                                                                                                                                                                                                                                                                                                                                                                                                                                                                                                                  | Institute of Post Graduate Medical Education & Research                                                                        | National Institute of Biomedical Genomics                                                                                      | Arindam Maitra; Aritra Biswas; Jayeeta Haldar; Monimoy Banerjee; Raja Ray; Saumitra Das                                                                                                                                                                                                                                                                                                                                                                                                                                                                                                                                                                                                                                                                                                                     |
| EPI_ISL_511903                                                                                                                                                                                                                                                                                                                                                                                                                                                                                                                                                                                                                                                                                                                                                                                                                                                                                                                                                                                                                                                                                                                                                                                                                                                                                                                                                                                                                                                                                                                                                                                                                                                                                                                                                                                                                                                                                                                                                                                                                                                                                                                                                                                                                                                                                                                                                                                                                                                                                                                                                                                                                                                                                                                                                                                                                                                                                                                                                                                                                                                                                                                                                                                  | Institute of Post Graduate Medical Education & Research                                                                        | National Institute of Biomedical Genomics - DBT's PAN-INDIA 1000 SARS--CoV-2 RNA Genome Sequencing Consortium                  | Arindam Maitra; Aritra Biswas; Jayeeta Haldar; Monimoy Banerjee; Raja Ray; Saumitra Das                                                                                                                                                                                                                                                                                                                                                                                                                                                                                                                                                                                                                                                                                                                     |
| EPI_ISL_491175, EPI_ISL_491226                                                                                                                                                                                                                                                                                                                                                                                                                                                                                                                                                                                                                                                                                                                                                                                                                                                                                                                                                                                                                                                                                                                                                                                                                                                                                                                                                                                                                                                                                                                                                                                                                                                                                                                                                                                                                                                                                                                                                                                                                                                                                                                                                                                                                                                                                                                                                                                                                                                                                                                                                                                                                                                                                                                                                                                                                                                                                                                                                                                                                                                                                                                                                                  | Instituto Gulbenkian de Ciência                                                                                                | Instituto Gulbenkian de Ciência                                                                                                | Cathy Paulino; Joao Sobral; João Costa; Ricardo Leite; Susana Ladeiro                                                                                                                                                                                                                                                                                                                                                                                                                                                                                                                                                                                                                                                                                                                                       |
| EPI_ISL_426364                                                                                                                                                                                                                                                                                                                                                                                                                                                                                                                                                                                                                                                                                                                                                                                                                                                                                                                                                                                                                                                                                                                                                                                                                                                                                                                                                                                                                                                                                                                                                                                                                                                                                                                                                                                                                                                                                                                                                                                                                                                                                                                                                                                                                                                                                                                                                                                                                                                                                                                                                                                                                                                                                                                                                                                                                                                                                                                                                                                                                                                                                                                                                                                  | Instituto Nacional de Ciencias Medicas y Nutricion Salvador Zubiran                                                            | Instituto Nacional de Ciencias Medicas y Nutricion                                                                             | Adnan Ariza Rodríguez; Alejandro Sánchez; Alfredo Ponce de León Garduño; Blanca Taboada; Carlos F. Arias; Carolina González Torres; Celia Boukadida; Cesar Raúl González Bonilla; Concepción Grajales Muñoz; Edgar Mendieta Condado; Eduardo Becerril Vargas; Fabiola Garcés Ayala; Fernando Ledesma Barrientos; Francisco Javier Gaytán Cervantes; Francisco Pulido; Gisela Barrera Badillo; Gloria Vázquez; Guillermo M. Ruiz-Palacios; Irma López Martínez; Joel Armando Vázquez Pérez; José Arturo Martínez Orozco; José Ernesto Ramírez González; José Esteban Muñoz Medina; Lucia Hernández Rivas; Luis Alberto García Andrade; Mario Mújica Sánchez; Pavel Isa; Pilar Ramos Cervantes; Ricardo Grande; Santiago Avila Ríos; Victor Hugo Borja Aburto; Violeta Ibarra Gonzalez                        |
| EPI_ISL_426361, EPI_ISL_426362, EPI_ISL_426363, EPI_ISL_426365                                                                                                                                                                                                                                                                                                                                                                                                                                                                                                                                                                                                                                                                                                                                                                                                                                                                                                                                                                                                                                                                                                                                                                                                                                                                                                                                                                                                                                                                                                                                                                                                                                                                                                                                                                                                                                                                                                                                                                                                                                                                                                                                                                                                                                                                                                                                                                                                                                                                                                                                                                                                                                                                                                                                                                                                                                                                                                                                                                                                                                                                                                                                  | Instituto Nacional de Ciencias Medicas y Nutricion Salvador Zubiran                                                            | Instituto Nacional de Ciencias Medicas y Nutricion Salvador Zubiran                                                            | Adnan Ariza Rodríguez; Alejandro Sánchez; Alfredo Ponce de León Garduño; Blanca Taboada; Carlos F. Arias; Carolina González Torres; Celia Boukadida; Cesar Raúl González Bonilla; Concepción Grajales Muñoz; Edgar Mendieta Condado; Eduardo Becerril Vargas; Fabiola Garcés Ayala; Fernando Ledesma Barrientos; Francisco Javier Gaytán Cervantes; Francisco Pulido; Gisela Barrera Badillo; Gloria Vázquez; Guillermo M. Ruiz-Palacios; Irma López Martínez; Joel Armando Vázquez Pérez; Jorge Salas Hernández; José Arturo Martínez Orozco; José Ernesto Ramírez González; José Esteban Muñoz Medina; Lucia Hernández Rivas; Luis Alberto García Andrade; Mario Mújica Sánchez; Pavel Isa; Pilar Ramos Cervantes; Ricardo Grande; Santiago Avila Ríos; Victor Hugo Borja Aburto; Violeta Ibarra Gonzalez |
| EPI_ISL_424345, EPI_ISL_424348, EPI_ISL_424626, EPI_ISL_424627                                                                                                                                                                                                                                                                                                                                                                                                                                                                                                                                                                                                                                                                                                                                                                                                                                                                                                                                                                                                                                                                                                                                                                                                                                                                                                                                                                                                                                                                                                                                                                                                                                                                                                                                                                                                                                                                                                                                                                                                                                                                                                                                                                                                                                                                                                                                                                                                                                                                                                                                                                                                                                                                                                                                                                                                                                                                                                                                                                                                                                                                                                                                  | Instituto Nacional de Enfermedades Respiratorias                                                                               | Instituto Nacional de Enfermedades Respiratorias                                                                               | Adnan Ariza Rodríguez; Alejandro Sánchez; Alfredo Ponce de León Garduño; Blanca Taboada; Carlos F. Arias; Carolina González Torres; Celia Boukadida; Cesar Raúl González Bonilla; Concepción Grajales Muñoz; Edgar Mendieta Condado; Eduardo Becerril Vargas; Fabiola Garcés Ayala; Fernando Ledesma Barrientos; Francisco Javier Gaytán Cervantes; Francisco Pulido; Gisela Barrera Badillo; Gloria Vázquez; Guillermo M. Ruiz-Palacios; Irma López Martínez; Joel Armando Vázquez Pérez; Jorge Salas Hernández; José Arturo Martínez Orozco; José Ernesto Ramírez González; José Esteban Muñoz Medina; Lucia Hernández Rivas; Luis Alberto García Andrade; Mario Mújica Sánchez; Pavel Isa; Pilar Ramos Cervantes; Ricardo Grande; Santiago Avila Ríos; Victor Hugo Borja Aburto; Violeta Ibarra Gonzalez |
| EPI_ISL_412972                                                                                                                                                                                                                                                                                                                                                                                                                                                                                                                                                                                                                                                                                                                                                                                                                                                                                                                                                                                                                                                                                                                                                                                                                                                                                                                                                                                                                                                                                                                                                                                                                                                                                                                                                                                                                                                                                                                                                                                                                                                                                                                                                                                                                                                                                                                                                                                                                                                                                                                                                                                                                                                                                                                                                                                                                                                                                                                                                                                                                                                                                                                                                                                  | Instituto Nacional de Enfermedades Respiratorias                                                                               | Instituto de Diagnostico y Referencia Epidemiologicos (INDRE)                                                                  | Araiza-Rodriguez Adnan; Arias Carlos; Barrera-Badillo Gisela; Boukadida Carla; Garcés-Ayala Fabiola; Hernández-Rivas Lucia; Isa Pavel; Lopez Susana; Lopez-Martinez Irma; Martinez Arturo; Mendieta-Condado Edgar; Munoz-Medina Esteban; Ramirez-Gonzalez Ernesto; Rodriguez-Maldonado Abri; Sanchez Alejandro; Taboada Blanca; Vazquez-Perez Joel; Wong-Arambula Claudia                                                                                                                                                                                                                                                                                                                                                                                                                                   |
| EPI_ISL_837600, EPI_ISL_837601, EPI_ISL_837602, EPI_ISL_837603, EPI_ISL_837604, EPI_ISL_837605, EPI_ISL_837606, EPI_ISL_837607, EPI_ISL_837608, EPI_ISL_837609, EPI_ISL_837610, EPI_ISL_837611, EPI_ISL_837612, EPI_ISL_837613, EPI_ISL_837614, EPI_ISL_837615, EPI_ISL_837616, EPI_ISL_837617, EPI_ISL_837618, EPI_ISL_837619, EPI_ISL_837620, EPI_ISL_837621, EPI_ISL_837622, EPI_ISL_837623, EPI_ISL_837624, EPI_ISL_837625, EPI_ISL_837626, EPI_ISL_837627, EPI_ISL_837628, EPI_ISL_837629, EPI_ISL_837630, EPI_ISL_837631, EPI_ISL_837632, EPI_ISL_837633, EPI_ISL_837634, EPI_ISL_837635, EPI_ISL_837636, EPI_ISL_837637, EPI_ISL_837638, EPI_ISL_837639, EPI_ISL_837640, EPI_ISL_837641, EPI_ISL_837642, EPI_ISL_837643, EPI_ISL_837644, EPI_ISL_837645, EPI_ISL_837646, EPI_ISL_837647, EPI_ISL_837648, EPI_ISL_837649, EPI_ISL_837650, EPI_ISL_837651, EPI_ISL_837652, EPI_ISL_837653, EPI_ISL_837654, EPI_ISL_837655, EPI_ISL_837656, EPI_ISL_837657, EPI_ISL_837658, EPI_ISL_837659, EPI_ISL_837660, EPI_ISL_837661, EPI_ISL_837662, EPI_ISL_837663, EPI_ISL_837664, EPI_ISL_837665, EPI_ISL_837666, EPI_ISL_837667, EPI_ISL_837668, EPI_ISL_837669, EPI_ISL_837670, EPI_ISL_837671, EPI_ISL_837672, EPI_ISL_837673, EPI_ISL_837674, EPI_ISL_837675, EPI_ISL_837676, EPI_ISL_837677, EPI_ISL_837678, EPI_ISL_837679, EPI_ISL_837680, EPI_ISL_837681, EPI_ISL_837682, EPI_ISL_837683, EPI_ISL_837684, EPI_ISL_837685, EPI_ISL_837686, EPI_ISL_837687, EPI_ISL_837688, EPI_ISL_837689, EPI_ISL_837690, EPI_ISL_837691, EPI_ISL_837692, EPI_ISL_837693, EPI_ISL_837694, EPI_ISL_837695, EPI_ISL_837696, EPI_ISL_837697, EPI_ISL_837698, EPI_ISL_837699, EPI_ISL_837700, EPI_ISL_837701, EPI_ISL_837702, EPI_ISL_837703, EPI_ISL_837704, EPI_ISL_837705, EPI_ISL_837706, EPI_ISL_837707, EPI_ISL_837708, EPI_ISL_837709, EPI_ISL_837710, EPI_ISL_837711, EPI_ISL_837712, EPI_ISL_837713, EPI_ISL_837714, EPI_ISL_837715, EPI_ISL_837716, EPI_ISL_837717, EPI_ISL_837718, EPI_ISL_837719, EPI_ISL_837720, EPI_ISL_837721, EPI_ISL_837722, EPI_ISL_837723, EPI_ISL_837724, EPI_ISL_837725, EPI_ISL_837726, EPI_ISL_837727, EPI_ISL_837728, EPI_ISL_837729, EPI_ISL_837730, EPI_ISL_837731, EPI_ISL_837732, EPI_ISL_837733, EPI_ISL_837734, EPI_ISL_837735, EPI_ISL_837736, EPI_ISL_837737, EPI_ISL_837738, EPI_ISL_837739, EPI_ISL_837740, EPI_ISL_837741, EPI_ISL_837742, EPI_ISL_837743, EPI_ISL_837744, EPI_ISL_837745, EPI_ISL_837746, EPI_ISL_837747, EPI_ISL_837748, EPI_ISL_837749, EPI_ISL_837750, EPI_ISL_837751, EPI_ISL_837752, EPI_ISL_837753, EPI_ISL_837754, EPI_ISL_837755, EPI_ISL_837756, EPI_ISL_837757, EPI_ISL_837758, EPI_ISL_837759, EPI_ISL_837760, EPI_ISL_837761, EPI_ISL_837762, EPI_ISL_837763, EPI_ISL_837764, EPI_ISL_837765, EPI_ISL_837766, EPI_ISL_837767, EPI_ISL_837768, EPI_ISL_837769, EPI_ISL_837770, EPI_ISL_837771, EPI_ISL_837772, EPI_ISL_837773, EPI_ISL_837774, EPI_ISL_837775, EPI_ISL_837776, EPI_ISL_837777, EPI_ISL_837778, EPI_ISL_837779, EPI_ISL_837780, EPI_ISL_837781, EPI_ISL_837782, EPI_ISL_837783, EPI_ISL_837784, EPI_ISL_837785, EPI_ISL_837786, EPI_ISL_837787, EPI_ISL_837788, EPI_ISL_837789, EPI_ISL_837790, EPI_ISL_837791, |                                                                                                                                |                                                                                                                                |                                                                                                                                                                                                                                                                                                                                                                                                                                                                                                                                                                                                                                                                                                                                                                                                             |

[illegible]

|                                                                                                                                                                                                                                                                                                                                                                                                                                                                                                                                                                                                                                                                                                                                                                                                                                                                                                                                                                                                                                                                                                                                                                                                                                                                                                                                                                                                                                                                                                                                                                                                                                                                                                                                                                                                                                                                                                                                                                                                                                                                                                                                                                                                                                                                                                                                                                                                                                                                                                                                                                                                                                                                                                                                                                                                                                                                                                                                                                                                                                                                                                                                                                                                                                                                                                                                                                                                                                                                                                                                                                                                                                                                                                                                                                                                                                                                                                                                                                                                                                                                                                                                                                                                                                                                                                                                                                                                                                                                                                                                                                                                                                                                                                                                                                                                                                                                                                                                                                                                                                                                                                                                                                                                                                                                                                                                                                                                                                                                                                                                                                                                                                                                                                                                                                                                                                                                                                                                                                                                                                                                                                                                                                                                                                                                                                                                                                                                                                                                                                                                                                                                                                                                                                                                                                                                                                                                                                                                                                                                                                                                                                                                                                                                                                                                                                                                                                                                                                                                                                                                                                                                                                                                                                                                                                                                                                                                                                                                                                                                                                                                                                                                                                                                                                                                                                                                                                                                                                                                                                                                                                                                                                                                                                                                                                                                                                                                                                                                                                                                                                                                                                                                                                                                                                                                                                                                                                                                                                                                                                                                                                                                                                                                                                                                                                                                                                                                                                                                                                                                                                                                                                                                                                                                                                                                                                                                                                                                                                                                                                                                                                                                                                                                                                                                                                                                                                                                                                                                                                                                                                                                                                                                                                                                                                                                                                                                                                                                                                                                                                                                                                                                                                                                                                                                                                                                                                                                                                                                                                                                                                                                                                                                                                                                                                                                                                                                        |                                                                  |                                                                                                                        |                                                                                                                                                                                                                                                                                                                                                                                                                                                                                                                                                                          |                                                                                                                                                                                                                                                                                               |
|----------------------------------------------------------------------------------------------------------------------------------------------------------------------------------------------------------------------------------------------------------------------------------------------------------------------------------------------------------------------------------------------------------------------------------------------------------------------------------------------------------------------------------------------------------------------------------------------------------------------------------------------------------------------------------------------------------------------------------------------------------------------------------------------------------------------------------------------------------------------------------------------------------------------------------------------------------------------------------------------------------------------------------------------------------------------------------------------------------------------------------------------------------------------------------------------------------------------------------------------------------------------------------------------------------------------------------------------------------------------------------------------------------------------------------------------------------------------------------------------------------------------------------------------------------------------------------------------------------------------------------------------------------------------------------------------------------------------------------------------------------------------------------------------------------------------------------------------------------------------------------------------------------------------------------------------------------------------------------------------------------------------------------------------------------------------------------------------------------------------------------------------------------------------------------------------------------------------------------------------------------------------------------------------------------------------------------------------------------------------------------------------------------------------------------------------------------------------------------------------------------------------------------------------------------------------------------------------------------------------------------------------------------------------------------------------------------------------------------------------------------------------------------------------------------------------------------------------------------------------------------------------------------------------------------------------------------------------------------------------------------------------------------------------------------------------------------------------------------------------------------------------------------------------------------------------------------------------------------------------------------------------------------------------------------------------------------------------------------------------------------------------------------------------------------------------------------------------------------------------------------------------------------------------------------------------------------------------------------------------------------------------------------------------------------------------------------------------------------------------------------------------------------------------------------------------------------------------------------------------------------------------------------------------------------------------------------------------------------------------------------------------------------------------------------------------------------------------------------------------------------------------------------------------------------------------------------------------------------------------------------------------------------------------------------------------------------------------------------------------------------------------------------------------------------------------------------------------------------------------------------------------------------------------------------------------------------------------------------------------------------------------------------------------------------------------------------------------------------------------------------------------------------------------------------------------------------------------------------------------------------------------------------------------------------------------------------------------------------------------------------------------------------------------------------------------------------------------------------------------------------------------------------------------------------------------------------------------------------------------------------------------------------------------------------------------------------------------------------------------------------------------------------------------------------------------------------------------------------------------------------------------------------------------------------------------------------------------------------------------------------------------------------------------------------------------------------------------------------------------------------------------------------------------------------------------------------------------------------------------------------------------------------------------------------------------------------------------------------------------------------------------------------------------------------------------------------------------------------------------------------------------------------------------------------------------------------------------------------------------------------------------------------------------------------------------------------------------------------------------------------------------------------------------------------------------------------------------------------------------------------------------------------------------------------------------------------------------------------------------------------------------------------------------------------------------------------------------------------------------------------------------------------------------------------------------------------------------------------------------------------------------------------------------------------------------------------------------------------------------------------------------------------------------------------------------------------------------------------------------------------------------------------------------------------------------------------------------------------------------------------------------------------------------------------------------------------------------------------------------------------------------------------------------------------------------------------------------------------------------------------------------------------------------------------------------------------------------------------------------------------------------------------------------------------------------------------------------------------------------------------------------------------------------------------------------------------------------------------------------------------------------------------------------------------------------------------------------------------------------------------------------------------------------------------------------------------------------------------------------------------------------------------------------------------------------------------------------------------------------------------------------------------------------------------------------------------------------------------------------------------------------------------------------------------------------------------------------------------------------------------------------------------------------------------------------------------------------------------------------------------------------------------------------------------------------------------------------------------------------------------------------------------------------------------------------------------------------------------------------------------------------------------------------------------------------------------------------------------------------------------------------------------------------------------------------------------------------------------------------------------------------------------------------------------------------------------------------------------------------------------------------------------------------------------------------------------------------------------------------------------------------------------------------------------------------------------------------------------------------------------------------------------------------------------------------------------------------------------------------------------------------------------------------------------------------------------------------------------------------------------------------------------------------------------------------------------------------------------------------------------------------------------------------------------------------------------------------------------------------------------------------------------------------------------------------------------------------------------------------------------------------------------------------------------------------------------------------------------------------------------------------------------------------------------------------------------------------------------------------------------------------------------------------------------------------------------------------------------------------------------------------------------------------------------------------------------------------------------------------------------------------------------------------------------------------------------------------------------------------------------------------------------------------------------------------------------------------------------------------------------------------------------------------------------------------------------------------------------------------------------------------------------------------------------------------------------------------------------------------------------------------------------------------------------------------------------------------------------------------------------------------------------------------------------------------------------------------------------------------------------------------------------------------------------------------------------------------------------------------------------------------------------------------------------------------------------------------------------------------------------------------------------------------------------------------------------------------------------------------------------------------------------------------------------------------------------------------------------------------------------------------------------------------------------------------------------------------------------------------------------------------------------------------------------------------------------------------------------------------------------------------------------------------------------------------------------------------------------------------------------------------------------------------------------------------------------------|------------------------------------------------------------------|------------------------------------------------------------------------------------------------------------------------|--------------------------------------------------------------------------------------------------------------------------------------------------------------------------------------------------------------------------------------------------------------------------------------------------------------------------------------------------------------------------------------------------------------------------------------------------------------------------------------------------------------------------------------------------------------------------|-----------------------------------------------------------------------------------------------------------------------------------------------------------------------------------------------------------------------------------------------------------------------------------------------|
| EPI_ISL_458156, EPI_ISL_462211, EPI_ISL_462239, EPI_ISL_464065                                                                                                                                                                                                                                                                                                                                                                                                                                                                                                                                                                                                                                                                                                                                                                                                                                                                                                                                                                                                                                                                                                                                                                                                                                                                                                                                                                                                                                                                                                                                                                                                                                                                                                                                                                                                                                                                                                                                                                                                                                                                                                                                                                                                                                                                                                                                                                                                                                                                                                                                                                                                                                                                                                                                                                                                                                                                                                                                                                                                                                                                                                                                                                                                                                                                                                                                                                                                                                                                                                                                                                                                                                                                                                                                                                                                                                                                                                                                                                                                                                                                                                                                                                                                                                                                                                                                                                                                                                                                                                                                                                                                                                                                                                                                                                                                                                                                                                                                                                                                                                                                                                                                                                                                                                                                                                                                                                                                                                                                                                                                                                                                                                                                                                                                                                                                                                                                                                                                                                                                                                                                                                                                                                                                                                                                                                                                                                                                                                                                                                                                                                                                                                                                                                                                                                                                                                                                                                                                                                                                                                                                                                                                                                                                                                                                                                                                                                                                                                                                                                                                                                                                                                                                                                                                                                                                                                                                                                                                                                                                                                                                                                                                                                                                                                                                                                                                                                                                                                                                                                                                                                                                                                                                                                                                                                                                                                                                                                                                                                                                                                                                                                                                                                                                                                                                                                                                                                                                                                                                                                                                                                                                                                                                                                                                                                                                                                                                                                                                                                                                                                                                                                                                                                                                                                                                                                                                                                                                                                                                                                                                                                                                                                                                                                                                                                                                                                                                                                                                                                                                                                                                                                                                                                                                                                                                                                                                                                                                                                                                                                                                                                                                                                                                                                                                                                                                                                                                                                                                                                                                                                                                                                                                                                                                                                                                         | KU Leuven, Rega Institute, Clinical and Epidemiological Virology | KU Leuven, Rega Institute, Clinical and Epidemiological Virology                                                       | Bert Vanmechelen; Joan Marti-Carerras; Piet Maes; Tony Wawina-Bokalanga                                                                                                                                                                                                                                                                                                                                                                                                                                                                                                  |                                                                                                                                                                                                                                                                                               |
| EPI_ISL_469075, EPI_ISL_510834                                                                                                                                                                                                                                                                                                                                                                                                                                                                                                                                                                                                                                                                                                                                                                                                                                                                                                                                                                                                                                                                                                                                                                                                                                                                                                                                                                                                                                                                                                                                                                                                                                                                                                                                                                                                                                                                                                                                                                                                                                                                                                                                                                                                                                                                                                                                                                                                                                                                                                                                                                                                                                                                                                                                                                                                                                                                                                                                                                                                                                                                                                                                                                                                                                                                                                                                                                                                                                                                                                                                                                                                                                                                                                                                                                                                                                                                                                                                                                                                                                                                                                                                                                                                                                                                                                                                                                                                                                                                                                                                                                                                                                                                                                                                                                                                                                                                                                                                                                                                                                                                                                                                                                                                                                                                                                                                                                                                                                                                                                                                                                                                                                                                                                                                                                                                                                                                                                                                                                                                                                                                                                                                                                                                                                                                                                                                                                                                                                                                                                                                                                                                                                                                                                                                                                                                                                                                                                                                                                                                                                                                                                                                                                                                                                                                                                                                                                                                                                                                                                                                                                                                                                                                                                                                                                                                                                                                                                                                                                                                                                                                                                                                                                                                                                                                                                                                                                                                                                                                                                                                                                                                                                                                                                                                                                                                                                                                                                                                                                                                                                                                                                                                                                                                                                                                                                                                                                                                                                                                                                                                                                                                                                                                                                                                                                                                                                                                                                                                                                                                                                                                                                                                                                                                                                                                                                                                                                                                                                                                                                                                                                                                                                                                                                                                                                                                                                                                                                                                                                                                                                                                                                                                                                                                                                                                                                                                                                                                                                                                                                                                                                                                                                                                                                                                                                                                                                                                                                                                                                                                                                                                                                                                                                                                                                                                                                         | Karolinska Universitetslaboratoriet                              | The Public Health Agency of Sweden                                                                                     | Anna Risberg; Anna-Malin Linde; Karin Tegmark-Wisell; Maria Lind Karlberg; Mattias Haukland; Mia Brytting; Olov Svartstrom; Oskar Karlsson Lindsjo; Petra Edquist; Reza Advani; Sandra Broddesson; Shamam Muradrasoli                                                                                                                                                                                                                                                                                                                                                    |                                                                                                                                                                                                                                                                                               |
| EPI_ISL_512816                                                                                                                                                                                                                                                                                                                                                                                                                                                                                                                                                                                                                                                                                                                                                                                                                                                                                                                                                                                                                                                                                                                                                                                                                                                                                                                                                                                                                                                                                                                                                                                                                                                                                                                                                                                                                                                                                                                                                                                                                                                                                                                                                                                                                                                                                                                                                                                                                                                                                                                                                                                                                                                                                                                                                                                                                                                                                                                                                                                                                                                                                                                                                                                                                                                                                                                                                                                                                                                                                                                                                                                                                                                                                                                                                                                                                                                                                                                                                                                                                                                                                                                                                                                                                                                                                                                                                                                                                                                                                                                                                                                                                                                                                                                                                                                                                                                                                                                                                                                                                                                                                                                                                                                                                                                                                                                                                                                                                                                                                                                                                                                                                                                                                                                                                                                                                                                                                                                                                                                                                                                                                                                                                                                                                                                                                                                                                                                                                                                                                                                                                                                                                                                                                                                                                                                                                                                                                                                                                                                                                                                                                                                                                                                                                                                                                                                                                                                                                                                                                                                                                                                                                                                                                                                                                                                                                                                                                                                                                                                                                                                                                                                                                                                                                                                                                                                                                                                                                                                                                                                                                                                                                                                                                                                                                                                                                                                                                                                                                                                                                                                                                                                                                                                                                                                                                                                                                                                                                                                                                                                                                                                                                                                                                                                                                                                                                                                                                                                                                                                                                                                                                                                                                                                                                                                                                                                                                                                                                                                                                                                                                                                                                                                                                                                                                                                                                                                                                                                                                                                                                                                                                                                                                                                                                                                                                                                                                                                                                                                                                                                                                                                                                                                                                                                                                                                                                                                                                                                                                                                                                                                                                                                                                                                                                                                                                                                         | Kenema Government Hospital, Ministry of Health and Sanitation    | Kenema Government Hospital, Ministry of Health and Sanitation                                                          | Andersen, K.; Garry, R.; Goba, A.; Grant, D.; Happi, C.; Jalloh, S.; Mehta, S.; Momoh, M.; Olawoye, I.; Oluniyi, P.; Park, D.; Sandi, J.; Siddle, K.; Tomkins-Tinch, C.                                                                                                                                                                                                                                                                                                                                                                                                  |                                                                                                                                                                                                                                                                                               |
| EPI_ISL_489996, EPI_ISL_489997                                                                                                                                                                                                                                                                                                                                                                                                                                                                                                                                                                                                                                                                                                                                                                                                                                                                                                                                                                                                                                                                                                                                                                                                                                                                                                                                                                                                                                                                                                                                                                                                                                                                                                                                                                                                                                                                                                                                                                                                                                                                                                                                                                                                                                                                                                                                                                                                                                                                                                                                                                                                                                                                                                                                                                                                                                                                                                                                                                                                                                                                                                                                                                                                                                                                                                                                                                                                                                                                                                                                                                                                                                                                                                                                                                                                                                                                                                                                                                                                                                                                                                                                                                                                                                                                                                                                                                                                                                                                                                                                                                                                                                                                                                                                                                                                                                                                                                                                                                                                                                                                                                                                                                                                                                                                                                                                                                                                                                                                                                                                                                                                                                                                                                                                                                                                                                                                                                                                                                                                                                                                                                                                                                                                                                                                                                                                                                                                                                                                                                                                                                                                                                                                                                                                                                                                                                                                                                                                                                                                                                                                                                                                                                                                                                                                                                                                                                                                                                                                                                                                                                                                                                                                                                                                                                                                                                                                                                                                                                                                                                                                                                                                                                                                                                                                                                                                                                                                                                                                                                                                                                                                                                                                                                                                                                                                                                                                                                                                                                                                                                                                                                                                                                                                                                                                                                                                                                                                                                                                                                                                                                                                                                                                                                                                                                                                                                                                                                                                                                                                                                                                                                                                                                                                                                                                                                                                                                                                                                                                                                                                                                                                                                                                                                                                                                                                                                                                                                                                                                                                                                                                                                                                                                                                                                                                                                                                                                                                                                                                                                                                                                                                                                                                                                                                                                                                                                                                                                                                                                                                                                                                                                                                                                                                                                                                                                         | King Fahad Medical City                                          | King Fahad Medical City                                                                                                | Alghoraibi, M.; Alosaimi, B.; Enani, M.; Naeem, A.                                                                                                                                                                                                                                                                                                                                                                                                                                                                                                                       |                                                                                                                                                                                                                                                                                               |
| EPI_ISL_516974                                                                                                                                                                                                                                                                                                                                                                                                                                                                                                                                                                                                                                                                                                                                                                                                                                                                                                                                                                                                                                                                                                                                                                                                                                                                                                                                                                                                                                                                                                                                                                                                                                                                                                                                                                                                                                                                                                                                                                                                                                                                                                                                                                                                                                                                                                                                                                                                                                                                                                                                                                                                                                                                                                                                                                                                                                                                                                                                                                                                                                                                                                                                                                                                                                                                                                                                                                                                                                                                                                                                                                                                                                                                                                                                                                                                                                                                                                                                                                                                                                                                                                                                                                                                                                                                                                                                                                                                                                                                                                                                                                                                                                                                                                                                                                                                                                                                                                                                                                                                                                                                                                                                                                                                                                                                                                                                                                                                                                                                                                                                                                                                                                                                                                                                                                                                                                                                                                                                                                                                                                                                                                                                                                                                                                                                                                                                                                                                                                                                                                                                                                                                                                                                                                                                                                                                                                                                                                                                                                                                                                                                                                                                                                                                                                                                                                                                                                                                                                                                                                                                                                                                                                                                                                                                                                                                                                                                                                                                                                                                                                                                                                                                                                                                                                                                                                                                                                                                                                                                                                                                                                                                                                                                                                                                                                                                                                                                                                                                                                                                                                                                                                                                                                                                                                                                                                                                                                                                                                                                                                                                                                                                                                                                                                                                                                                                                                                                                                                                                                                                                                                                                                                                                                                                                                                                                                                                                                                                                                                                                                                                                                                                                                                                                                                                                                                                                                                                                                                                                                                                                                                                                                                                                                                                                                                                                                                                                                                                                                                                                                                                                                                                                                                                                                                                                                                                                                                                                                                                                                                                                                                                                                                                                                                                                                                                                                                         | King Georges Medical University                                  | CSIR-National Botanical Research Institute                                                                             | Amita Jain; Babita Singh; Danish Nasar Khan; Hricha Mishra; Kishan Sahu; MLB Bhatt; Mehar H.Asif; Om Prakash; Priti Prasad; SK Barik; Samir V. Sawant; Shantanu Prakash; Sumit Kr. Bag; Suruchi Shukla                                                                                                                                                                                                                                                                                                                                                                   |                                                                                                                                                                                                                                                                                               |
| EPI_ISL_458037                                                                                                                                                                                                                                                                                                                                                                                                                                                                                                                                                                                                                                                                                                                                                                                                                                                                                                                                                                                                                                                                                                                                                                                                                                                                                                                                                                                                                                                                                                                                                                                                                                                                                                                                                                                                                                                                                                                                                                                                                                                                                                                                                                                                                                                                                                                                                                                                                                                                                                                                                                                                                                                                                                                                                                                                                                                                                                                                                                                                                                                                                                                                                                                                                                                                                                                                                                                                                                                                                                                                                                                                                                                                                                                                                                                                                                                                                                                                                                                                                                                                                                                                                                                                                                                                                                                                                                                                                                                                                                                                                                                                                                                                                                                                                                                                                                                                                                                                                                                                                                                                                                                                                                                                                                                                                                                                                                                                                                                                                                                                                                                                                                                                                                                                                                                                                                                                                                                                                                                                                                                                                                                                                                                                                                                                                                                                                                                                                                                                                                                                                                                                                                                                                                                                                                                                                                                                                                                                                                                                                                                                                                                                                                                                                                                                                                                                                                                                                                                                                                                                                                                                                                                                                                                                                                                                                                                                                                                                                                                                                                                                                                                                                                                                                                                                                                                                                                                                                                                                                                                                                                                                                                                                                                                                                                                                                                                                                                                                                                                                                                                                                                                                                                                                                                                                                                                                                                                                                                                                                                                                                                                                                                                                                                                                                                                                                                                                                                                                                                                                                                                                                                                                                                                                                                                                                                                                                                                                                                                                                                                                                                                                                                                                                                                                                                                                                                                                                                                                                                                                                                                                                                                                                                                                                                                                                                                                                                                                                                                                                                                                                                                                                                                                                                                                                                                                                                                                                                                                                                                                                                                                                                                                                                                                                                                                                                                         | King Institute of Preventive Medicine & Research                 | CSIR-Centre for Cellular and Molecular Biology                                                                         | Archana Bharadwaj Siva; Dhiviya Vedagiri; Divya Gupta; Divya Tej Sowpati; G. Dhinakar Raj; G. Ravikumar; K Thangaraj; K.Kaveri; Karthik Bharadwaj Tallapaka; Krishnan Harinivas Harshan; Lamuk Zaveri; Namami Gaur; P.Padmapriya; Payel Mukherjee; Priya Singh; Purushotham Vodnala; R. P. Aravindh Babu; R.Kiruba; Rakesh K Mishra; S.Magesh; S.Sivasubramanian; S.Vennila; Sakshi Shambhavi; Santosh Kumar Kuncha; Shagurfa Khan; Sofia Banu; Tulasi Nagabandi; Vishal Sah                                                                                             |                                                                                                                                                                                                                                                                                               |
| EPI_ISL_483550                                                                                                                                                                                                                                                                                                                                                                                                                                                                                                                                                                                                                                                                                                                                                                                                                                                                                                                                                                                                                                                                                                                                                                                                                                                                                                                                                                                                                                                                                                                                                                                                                                                                                                                                                                                                                                                                                                                                                                                                                                                                                                                                                                                                                                                                                                                                                                                                                                                                                                                                                                                                                                                                                                                                                                                                                                                                                                                                                                                                                                                                                                                                                                                                                                                                                                                                                                                                                                                                                                                                                                                                                                                                                                                                                                                                                                                                                                                                                                                                                                                                                                                                                                                                                                                                                                                                                                                                                                                                                                                                                                                                                                                                                                                                                                                                                                                                                                                                                                                                                                                                                                                                                                                                                                                                                                                                                                                                                                                                                                                                                                                                                                                                                                                                                                                                                                                                                                                                                                                                                                                                                                                                                                                                                                                                                                                                                                                                                                                                                                                                                                                                                                                                                                                                                                                                                                                                                                                                                                                                                                                                                                                                                                                                                                                                                                                                                                                                                                                                                                                                                                                                                                                                                                                                                                                                                                                                                                                                                                                                                                                                                                                                                                                                                                                                                                                                                                                                                                                                                                                                                                                                                                                                                                                                                                                                                                                                                                                                                                                                                                                                                                                                                                                                                                                                                                                                                                                                                                                                                                                                                                                                                                                                                                                                                                                                                                                                                                                                                                                                                                                                                                                                                                                                                                                                                                                                                                                                                                                                                                                                                                                                                                                                                                                                                                                                                                                                                                                                                                                                                                                                                                                                                                                                                                                                                                                                                                                                                                                                                                                                                                                                                                                                                                                                                                                                                                                                                                                                                                                                                                                                                                                                                                                                                                                                                                                         | Kingdom of Bahrain Ministry of Health                            | Erasmus Medical Center                                                                                                 | Amjad Ghanem Mohamed; Anne van der Linden; Bas Oude Munnink; Claudia Schapendonk; David Nieuwenhuijse; Ebrahim Shehad; Fatema; Hashmeya Al Wasti; Irina Chestakova; Marion Koopmans; Mark Pronk; Pascal Lexmond; Reina Sikkema; Richard Molenkamp; Stefan van Nieuwkoop; Theo Bestebroer; on behalf of the Dutch national COVID-19 response team.                                                                                                                                                                                                                        |                                                                                                                                                                                                                                                                                               |
| EPI_ISL_429160                                                                                                                                                                                                                                                                                                                                                                                                                                                                                                                                                                                                                                                                                                                                                                                                                                                                                                                                                                                                                                                                                                                                                                                                                                                                                                                                                                                                                                                                                                                                                                                                                                                                                                                                                                                                                                                                                                                                                                                                                                                                                                                                                                                                                                                                                                                                                                                                                                                                                                                                                                                                                                                                                                                                                                                                                                                                                                                                                                                                                                                                                                                                                                                                                                                                                                                                                                                                                                                                                                                                                                                                                                                                                                                                                                                                                                                                                                                                                                                                                                                                                                                                                                                                                                                                                                                                                                                                                                                                                                                                                                                                                                                                                                                                                                                                                                                                                                                                                                                                                                                                                                                                                                                                                                                                                                                                                                                                                                                                                                                                                                                                                                                                                                                                                                                                                                                                                                                                                                                                                                                                                                                                                                                                                                                                                                                                                                                                                                                                                                                                                                                                                                                                                                                                                                                                                                                                                                                                                                                                                                                                                                                                                                                                                                                                                                                                                                                                                                                                                                                                                                                                                                                                                                                                                                                                                                                                                                                                                                                                                                                                                                                                                                                                                                                                                                                                                                                                                                                                                                                                                                                                                                                                                                                                                                                                                                                                                                                                                                                                                                                                                                                                                                                                                                                                                                                                                                                                                                                                                                                                                                                                                                                                                                                                                                                                                                                                                                                                                                                                                                                                                                                                                                                                                                                                                                                                                                                                                                                                                                                                                                                                                                                                                                                                                                                                                                                                                                                                                                                                                                                                                                                                                                                                                                                                                                                                                                                                                                                                                                                                                                                                                                                                                                                                                                                                                                                                                                                                                                                                                                                                                                                                                                                                                                                                                                                         | Klinisk mikrobiologi Orebro                                      | The Public Health Agency of Sweden                                                                                     | Anna Risberg; Anna-Malin Linde; Karin Tegmark-Wisell; Maria Lind Karlberg; Martin Sundqvist; Olov Svartstrom; Oskar Karlsson Lindsjo; Shaman Muradrasoli                                                                                                                                                                                                                                                                                                                                                                                                                 |                                                                                                                                                                                                                                                                                               |
| EPI_ISL_510871, EPI_ISL_676512                                                                                                                                                                                                                                                                                                                                                                                                                                                                                                                                                                                                                                                                                                                                                                                                                                                                                                                                                                                                                                                                                                                                                                                                                                                                                                                                                                                                                                                                                                                                                                                                                                                                                                                                                                                                                                                                                                                                                                                                                                                                                                                                                                                                                                                                                                                                                                                                                                                                                                                                                                                                                                                                                                                                                                                                                                                                                                                                                                                                                                                                                                                                                                                                                                                                                                                                                                                                                                                                                                                                                                                                                                                                                                                                                                                                                                                                                                                                                                                                                                                                                                                                                                                                                                                                                                                                                                                                                                                                                                                                                                                                                                                                                                                                                                                                                                                                                                                                                                                                                                                                                                                                                                                                                                                                                                                                                                                                                                                                                                                                                                                                                                                                                                                                                                                                                                                                                                                                                                                                                                                                                                                                                                                                                                                                                                                                                                                                                                                                                                                                                                                                                                                                                                                                                                                                                                                                                                                                                                                                                                                                                                                                                                                                                                                                                                                                                                                                                                                                                                                                                                                                                                                                                                                                                                                                                                                                                                                                                                                                                                                                                                                                                                                                                                                                                                                                                                                                                                                                                                                                                                                                                                                                                                                                                                                                                                                                                                                                                                                                                                                                                                                                                                                                                                                                                                                                                                                                                                                                                                                                                                                                                                                                                                                                                                                                                                                                                                                                                                                                                                                                                                                                                                                                                                                                                                                                                                                                                                                                                                                                                                                                                                                                                                                                                                                                                                                                                                                                                                                                                                                                                                                                                                                                                                                                                                                                                                                                                                                                                                                                                                                                                                                                                                                                                                                                                                                                                                                                                                                                                                                                                                                                                                                                                                                                                                         | Klinisk mikrobiologi Linköping                                   | The Public Health Agency of Sweden                                                                                     | Anna Risberg; Anna-Malin Linde; Department of Microbiology; Karin Tegmark-Wisell; Maria Lind Karlberg; Mattias Haukland; Mia Brytting; Olov Svartstrom; Oskar Karlsson Lindsjo; Petra Edquist; Reza Advani; Sandra Broddesson; The Public Health Agency of Sweden                                                                                                                                                                                                                                                                                                        |                                                                                                                                                                                                                                                                                               |
| EPI_ISL_424868                                                                                                                                                                                                                                                                                                                                                                                                                                                                                                                                                                                                                                                                                                                                                                                                                                                                                                                                                                                                                                                                                                                                                                                                                                                                                                                                                                                                                                                                                                                                                                                                                                                                                                                                                                                                                                                                                                                                                                                                                                                                                                                                                                                                                                                                                                                                                                                                                                                                                                                                                                                                                                                                                                                                                                                                                                                                                                                                                                                                                                                                                                                                                                                                                                                                                                                                                                                                                                                                                                                                                                                                                                                                                                                                                                                                                                                                                                                                                                                                                                                                                                                                                                                                                                                                                                                                                                                                                                                                                                                                                                                                                                                                                                                                                                                                                                                                                                                                                                                                                                                                                                                                                                                                                                                                                                                                                                                                                                                                                                                                                                                                                                                                                                                                                                                                                                                                                                                                                                                                                                                                                                                                                                                                                                                                                                                                                                                                                                                                                                                                                                                                                                                                                                                                                                                                                                                                                                                                                                                                                                                                                                                                                                                                                                                                                                                                                                                                                                                                                                                                                                                                                                                                                                                                                                                                                                                                                                                                                                                                                                                                                                                                                                                                                                                                                                                                                                                                                                                                                                                                                                                                                                                                                                                                                                                                                                                                                                                                                                                                                                                                                                                                                                                                                                                                                                                                                                                                                                                                                                                                                                                                                                                                                                                                                                                                                                                                                                                                                                                                                                                                                                                                                                                                                                                                                                                                                                                                                                                                                                                                                                                                                                                                                                                                                                                                                                                                                                                                                                                                                                                                                                                                                                                                                                                                                                                                                                                                                                                                                                                                                                                                                                                                                                                                                                                                                                                                                                                                                                                                                                                                                                                                                                                                                                                                                                                         | LA Office of Public Health Laboratories                          | Pathogen Discovery, Respiratory Viruses Branch, Division of Viral Diseases, Centers for Disease Control and Prevention | Alison S. Laufer Halpin; Anna Uehara; Christopher A. Elkins; Clinton R. Paden; Halbin Wang; Jing Zhang; Krista Queen; Mary S. Kекler; Rachel Marine; Suxiang Tong; Yan Li; Ying Tao                                                                                                                                                                                                                                                                                                                                                                                      |                                                                                                                                                                                                                                                                                               |
| EPI_ISL_1137459, EPI_ISL_1137475, EPI_ISL_1137476, EPI_ISL_1137477, see above                                                                                                                                                                                                                                                                                                                                                                                                                                                                                                                                                                                                                                                                                                                                                                                                                                                                                                                                                                                                                                                                                                                                                                                                                                                                                                                                                                                                                                                                                                                                                                                                                                                                                                                                                                                                                                                                                                                                                                                                                                                                                                                                                                                                                                                                                                                                                                                                                                                                                                                                                                                                                                                                                                                                                                                                                                                                                                                                                                                                                                                                                                                                                                                                                                                                                                                                                                                                                                                                                                                                                                                                                                                                                                                                                                                                                                                                                                                                                                                                                                                                                                                                                                                                                                                                                                                                                                                                                                                                                                                                                                                                                                                                                                                                                                                                                                                                                                                                                                                                                                                                                                                                                                                                                                                                                                                                                                                                                                                                                                                                                                                                                                                                                                                                                                                                                                                                                                                                                                                                                                                                                                                                                                                                                                                                                                                                                                                                                                                                                                                                                                                                                                                                                                                                                                                                                                                                                                                                                                                                                                                                                                                                                                                                                                                                                                                                                                                                                                                                                                                                                                                                                                                                                                                                                                                                                                                                                                                                                                                                                                                                                                                                                                                                                                                                                                                                                                                                                                                                                                                                                                                                                                                                                                                                                                                                                                                                                                                                                                                                                                                                                                                                                                                                                                                                                                                                                                                                                                                                                                                                                                                                                                                                                                                                                                                                                                                                                                                                                                                                                                                                                                                                                                                                                                                                                                                                                                                                                                                                                                                                                                                                                                                                                                                                                                                                                                                                                                                                                                                                                                                                                                                                                                                                                                                                                                                                                                                                                                                                                                                                                                                                                                                                                                                                                                                                                                                                                                                                                                                                                                                                                                                                                                                                                                                          | LABDIS-UAGro                                                     | Instituto Nacional de Medicina Genomica                                                                                | Adolfo Roman-Roman; Alcaraz N; Azucena D. Alvarez-Diaz; Berenice Illades-Aguiar; Cedro-Tanda A; Ciresthel Bello-Rios; Cisneros-Villanueva M; Daniel Hernandez-Sotelo; Fredy O Beltran-Anaya; Gladys W. Valente-Nio; Gonzalez-Barrera D; Herrera-Montalvo LA; Hidalgo-Miranda A; Hugo A. Rodriguez-Ruiz; Jaqueline Loeza-Loeza; Julio C. Azucar-Hesiquio; Luis I. Basilio-Leyva; Madian Valdez-Quinones; Marco Antonio-Leyva; Mendoza-Vargas A; Oscar del Moral-Hernandez; Ramirez-Vega O; Rangel-DeLeon D; Reyes-Grajeda JP; Roberto Dircio-Maldonado; Sifuentes-Rojas C |                                                                                                                                                                                                                                                                                               |
| EPI_ISL_1516777, EPI_ISL_1516778, EPI_ISL_1516779, EPI_ISL_1516780, EPI_ISL_1516781, EPI_ISL_1516782, EPI_ISL_1516783, EPI_ISL_1516784, EPI_ISL_1516785, EPI_ISL_1516786                                                                                                                                                                                                                                                                                                                                                                                                                                                                                                                                                                                                                                                                                                                                                                                                                                                                                                                                                                                                                                                                                                                                                                                                                                                                                                                                                                                                                                                                                                                                                                                                                                                                                                                                                                                                                                                                                                                                                                                                                                                                                                                                                                                                                                                                                                                                                                                                                                                                                                                                                                                                                                                                                                                                                                                                                                                                                                                                                                                                                                                                                                                                                                                                                                                                                                                                                                                                                                                                                                                                                                                                                                                                                                                                                                                                                                                                                                                                                                                                                                                                                                                                                                                                                                                                                                                                                                                                                                                                                                                                                                                                                                                                                                                                                                                                                                                                                                                                                                                                                                                                                                                                                                                                                                                                                                                                                                                                                                                                                                                                                                                                                                                                                                                                                                                                                                                                                                                                                                                                                                                                                                                                                                                                                                                                                                                                                                                                                                                                                                                                                                                                                                                                                                                                                                                                                                                                                                                                                                                                                                                                                                                                                                                                                                                                                                                                                                                                                                                                                                                                                                                                                                                                                                                                                                                                                                                                                                                                                                                                                                                                                                                                                                                                                                                                                                                                                                                                                                                                                                                                                                                                                                                                                                                                                                                                                                                                                                                                                                                                                                                                                                                                                                                                                                                                                                                                                                                                                                                                                                                                                                                                                                                                                                                                                                                                                                                                                                                                                                                                                                                                                                                                                                                                                                                                                                                                                                                                                                                                                                                                                                                                                                                                                                                                                                                                                                                                                                                                                                                                                                                                                                                                                                                                                                                                                                                                                                                                                                                                                                                                                                                                                                                                                                                                                                                                                                                                                                                                                                                                                                                                                                                                                               | see above                                                        | LESP Aguascalientes                                                                                                    | Instituto de Diagnostico y Referencia Epidemiologicos (INDRE)                                                                                                                                                                                                                                                                                                                                                                                                                                                                                                            | Abril Rodriguez-Maldonado; Ariadna Medina-Benitez; Claudia Wong-Arambula; Ernesto Ramirez-Gonzalez.; Gisela Barrera-Badillo; Irma Lopez-Martinez; Joaquin Quiroz-Mercado; Lucia Hernandez-Rivas; Natividad Cruz-Ortiz; Sergio Rangel-Guerrero; Tatiana Nunez-Garcia; Vanessa Rivero-Arredondo |
| EPI_ISL_1365658, EPI_ISL_1365659, EPI_ISL_1365660, EPI_ISL_1424050                                                                                                                                                                                                                                                                                                                                                                                                                                                                                                                                                                                                                                                                                                                                                                                                                                                                                                                                                                                                                                                                                                                                                                                                                                                                                                                                                                                                                                                                                                                                                                                                                                                                                                                                                                                                                                                                                                                                                                                                                                                                                                                                                                                                                                                                                                                                                                                                                                                                                                                                                                                                                                                                                                                                                                                                                                                                                                                                                                                                                                                                                                                                                                                                                                                                                                                                                                                                                                                                                                                                                                                                                                                                                                                                                                                                                                                                                                                                                                                                                                                                                                                                                                                                                                                                                                                                                                                                                                                                                                                                                                                                                                                                                                                                                                                                                                                                                                                                                                                                                                                                                                                                                                                                                                                                                                                                                                                                                                                                                                                                                                                                                                                                                                                                                                                                                                                                                                                                                                                                                                                                                                                                                                                                                                                                                                                                                                                                                                                                                                                                                                                                                                                                                                                                                                                                                                                                                                                                                                                                                                                                                                                                                                                                                                                                                                                                                                                                                                                                                                                                                                                                                                                                                                                                                                                                                                                                                                                                                                                                                                                                                                                                                                                                                                                                                                                                                                                                                                                                                                                                                                                                                                                                                                                                                                                                                                                                                                                                                                                                                                                                                                                                                                                                                                                                                                                                                                                                                                                                                                                                                                                                                                                                                                                                                                                                                                                                                                                                                                                                                                                                                                                                                                                                                                                                                                                                                                                                                                                                                                                                                                                                                                                                                                                                                                                                                                                                                                                                                                                                                                                                                                                                                                                                                                                                                                                                                                                                                                                                                                                                                                                                                                                                                                                                                                                                                                                                                                                                                                                                                                                                                                                                                                                                                                                                     | LESP Baja California                                             | Instituto de Diagnostico y Referencia Epidemiologicos (INDRE)                                                          | Abril Rodriguez-Maldonado; Ariadna Medina-Benitez; Claudia Wong-Arambula; Ernesto Ramirez-Gonzalez.; Gisela Barrera-Badillo; Irma Lopez-Martinez; Joaquin Quiroz-Mercado; Lucia Hernandez-Rivas; Natividad Cruz-Ortiz; Sergio Rangel-Guerrero; Tatiana Nunez-Garcia; Vanessa Rivero-Arredondo                                                                                                                                                                                                                                                                            |                                                                                                                                                                                                                                                                                               |
| EPI_ISL_1337370, EPI_ISL_1337371, EPI_ISL_1337373, EPI_ISL_1337374, EPI_ISL_1337392, EPI_ISL_1337393                                                                                                                                                                                                                                                                                                                                                                                                                                                                                                                                                                                                                                                                                                                                                                                                                                                                                                                                                                                                                                                                                                                                                                                                                                                                                                                                                                                                                                                                                                                                                                                                                                                                                                                                                                                                                                                                                                                                                                                                                                                                                                                                                                                                                                                                                                                                                                                                                                                                                                                                                                                                                                                                                                                                                                                                                                                                                                                                                                                                                                                                                                                                                                                                                                                                                                                                                                                                                                                                                                                                                                                                                                                                                                                                                                                                                                                                                                                                                                                                                                                                                                                                                                                                                                                                                                                                                                                                                                                                                                                                                                                                                                                                                                                                                                                                                                                                                                                                                                                                                                                                                                                                                                                                                                                                                                                                                                                                                                                                                                                                                                                                                                                                                                                                                                                                                                                                                                                                                                                                                                                                                                                                                                                                                                                                                                                                                                                                                                                                                                                                                                                                                                                                                                                                                                                                                                                                                                                                                                                                                                                                                                                                                                                                                                                                                                                                                                                                                                                                                                                                                                                                                                                                                                                                                                                                                                                                                                                                                                                                                                                                                                                                                                                                                                                                                                                                                                                                                                                                                                                                                                                                                                                                                                                                                                                                                                                                                                                                                                                                                                                                                                                                                                                                                                                                                                                                                                                                                                                                                                                                                                                                                                                                                                                                                                                                                                                                                                                                                                                                                                                                                                                                                                                                                                                                                                                                                                                                                                                                                                                                                                                                                                                                                                                                                                                                                                                                                                                                                                                                                                                                                                                                                                                                                                                                                                                                                                                                                                                                                                                                                                                                                                                                                                                                                                                                                                                                                                                                                                                                                                                                                                                                                                                                                                   | LESP Baja California Sur                                         | Instituto de Diagnostico y Referencia Epidemiologicos (INDRE)                                                          | Abril Rodriguez-Maldonado; Ariadna Medina-Benitez; Claudia Wong-Arambula; Ernesto Ramirez-Gonzalez.; Gisela Barrera-Badillo; Irma Lopez-Martinez; Joaquin Quiroz-Mercado; Lucia Hernandez-Rivas; Natividad Cruz-Ortiz; Sergio Rangel-Guerrero; Tatiana Nunez-Garcia; Vanessa Rivero-Arredondo                                                                                                                                                                                                                                                                            |                                                                                                                                                                                                                                                                                               |
| EPI_ISL_1400299, EPI_ISL_1424015                                                                                                                                                                                                                                                                                                                                                                                                                                                                                                                                                                                                                                                                                                                                                                                                                                                                                                                                                                                                                                                                                                                                                                                                                                                                                                                                                                                                                                                                                                                                                                                                                                                                                                                                                                                                                                                                                                                                                                                                                                                                                                                                                                                                                                                                                                                                                                                                                                                                                                                                                                                                                                                                                                                                                                                                                                                                                                                                                                                                                                                                                                                                                                                                                                                                                                                                                                                                                                                                                                                                                                                                                                                                                                                                                                                                                                                                                                                                                                                                                                                                                                                                                                                                                                                                                                                                                                                                                                                                                                                                                                                                                                                                                                                                                                                                                                                                                                                                                                                                                                                                                                                                                                                                                                                                                                                                                                                                                                                                                                                                                                                                                                                                                                                                                                                                                                                                                                                                                                                                                                                                                                                                                                                                                                                                                                                                                                                                                                                                                                                                                                                                                                                                                                                                                                                                                                                                                                                                                                                                                                                                                                                                                                                                                                                                                                                                                                                                                                                                                                                                                                                                                                                                                                                                                                                                                                                                                                                                                                                                                                                                                                                                                                                                                                                                                                                                                                                                                                                                                                                                                                                                                                                                                                                                                                                                                                                                                                                                                                                                                                                                                                                                                                                                                                                                                                                                                                                                                                                                                                                                                                                                                                                                                                                                                                                                                                                                                                                                                                                                                                                                                                                                                                                                                                                                                                                                                                                                                                                                                                                                                                                                                                                                                                                                                                                                                                                                                                                                                                                                                                                                                                                                                                                                                                                                                                                                                                                                                                                                                                                                                                                                                                                                                                                                                                                                                                                                                                                                                                                                                                                                                                                                                                                                                                                                                                       | LESP Campeche                                                    | Instituto de Diagnostico y Referencia Epidemiologicos (INDRE)                                                          | Abril Rodriguez-Maldonado; Ariadna Medina-Benitez; Claudia Wong-Arambula; Ernesto Ramirez-Gonzalez.; Gisela Barrera-Badillo; Irma Lopez-Martinez; Joaquin Quiroz-Mercado; Lucia Hernandez-Rivas; Natividad Cruz-Ortiz; Sergio Rangel-Guerrero; Tatiana Nunez-Garcia; Vanessa Rivero-Arredondo                                                                                                                                                                                                                                                                            |                                                                                                                                                                                                                                                                                               |
| EPI_ISL_1424013, EPI_ISL_1424020                                                                                                                                                                                                                                                                                                                                                                                                                                                                                                                                                                                                                                                                                                                                                                                                                                                                                                                                                                                                                                                                                                                                                                                                                                                                                                                                                                                                                                                                                                                                                                                                                                                                                                                                                                                                                                                                                                                                                                                                                                                                                                                                                                                                                                                                                                                                                                                                                                                                                                                                                                                                                                                                                                                                                                                                                                                                                                                                                                                                                                                                                                                                                                                                                                                                                                                                                                                                                                                                                                                                                                                                                                                                                                                                                                                                                                                                                                                                                                                                                                                                                                                                                                                                                                                                                                                                                                                                                                                                                                                                                                                                                                                                                                                                                                                                                                                                                                                                                                                                                                                                                                                                                                                                                                                                                                                                                                                                                                                                                                                                                                                                                                                                                                                                                                                                                                                                                                                                                                                                                                                                                                                                                                                                                                                                                                                                                                                                                                                                                                                                                                                                                                                                                                                                                                                                                                                                                                                                                                                                                                                                                                                                                                                                                                                                                                                                                                                                                                                                                                                                                                                                                                                                                                                                                                                                                                                                                                                                                                                                                                                                                                                                                                                                                                                                                                                                                                                                                                                                                                                                                                                                                                                                                                                                                                                                                                                                                                                                                                                                                                                                                                                                                                                                                                                                                                                                                                                                                                                                                                                                                                                                                                                                                                                                                                                                                                                                                                                                                                                                                                                                                                                                                                                                                                                                                                                                                                                                                                                                                                                                                                                                                                                                                                                                                                                                                                                                                                                                                                                                                                                                                                                                                                                                                                                                                                                                                                                                                                                                                                                                                                                                                                                                                                                                                                                                                                                                                                                                                                                                                                                                                                                                                                                                                                                                                                       | LESP Chiapas                                                     | Instituto de Diagnostico y Referencia Epidemiologicos (INDRE)                                                          | Abril Rodriguez-Maldonado; Ariadna Medina-Benitez; Claudia Wong-Arambula; Ernesto Ramirez-Gonzalez.; Gisela Barrera-Badillo; Irma Lopez-Martinez; Joaquin Quiroz-Mercado; Lucia Hernandez-Rivas; Natividad Cruz-Ortiz; Sergio Rangel-Guerrero; Tatiana Nunez-Garcia; Vanessa Rivero-Arredondo                                                                                                                                                                                                                                                                            |                                                                                                                                                                                                                                                                                               |
| EPI_ISL_1399271, EPI_ISL_1405905                                                                                                                                                                                                                                                                                                                                                                                                                                                                                                                                                                                                                                                                                                                                                                                                                                                                                                                                                                                                                                                                                                                                                                                                                                                                                                                                                                                                                                                                                                                                                                                                                                                                                                                                                                                                                                                                                                                                                                                                                                                                                                                                                                                                                                                                                                                                                                                                                                                                                                                                                                                                                                                                                                                                                                                                                                                                                                                                                                                                                                                                                                                                                                                                                                                                                                                                                                                                                                                                                                                                                                                                                                                                                                                                                                                                                                                                                                                                                                                                                                                                                                                                                                                                                                                                                                                                                                                                                                                                                                                                                                                                                                                                                                                                                                                                                                                                                                                                                                                                                                                                                                                                                                                                                                                                                                                                                                                                                                                                                                                                                                                                                                                                                                                                                                                                                                                                                                                                                                                                                                                                                                                                                                                                                                                                                                                                                                                                                                                                                                                                                                                                                                                                                                                                                                                                                                                                                                                                                                                                                                                                                                                                                                                                                                                                                                                                                                                                                                                                                                                                                                                                                                                                                                                                                                                                                                                                                                                                                                                                                                                                                                                                                                                                                                                                                                                                                                                                                                                                                                                                                                                                                                                                                                                                                                                                                                                                                                                                                                                                                                                                                                                                                                                                                                                                                                                                                                                                                                                                                                                                                                                                                                                                                                                                                                                                                                                                                                                                                                                                                                                                                                                                                                                                                                                                                                                                                                                                                                                                                                                                                                                                                                                                                                                                                                                                                                                                                                                                                                                                                                                                                                                                                                                                                                                                                                                                                                                                                                                                                                                                                                                                                                                                                                                                                                                                                                                                                                                                                                                                                                                                                                                                                                                                                                                                                                       | LESP Chihuahua                                                   | Instituto de Diagnostico y Referencia Epidemiologicos (INDRE)                                                          | Abril Rodriguez-Maldonado; Ariadna Medina-Benitez; Claudia Wong-Arambula; Ernesto Ramirez-Gonzalez.; Gisela Barrera-Badillo; Irma Lopez-Martinez; Joaquin Quiroz-Mercado; Lucia Hernandez-Rivas; Natividad Cruz-Ortiz; Sergio Rangel-Guerrero; Tatiana Nunez-Garcia; Vanessa Rivero-Arredondo                                                                                                                                                                                                                                                                            |                                                                                                                                                                                                                                                                                               |
| EPI_ISL_1365657, EPI_ISL_1366687, EPI_ISL_1366688, EPI_ISL_1366689, see above                                                                                                                                                                                                                                                                                                                                                                                                                                                                                                                                                                                                                                                                                                                                                                                                                                                                                                                                                                                                                                                                                                                                                                                                                                                                                                                                                                                                                                                                                                                                                                                                                                                                                                                                                                                                                                                                                                                                                                                                                                                                                                                                                                                                                                                                                                                                                                                                                                                                                                                                                                                                                                                                                                                                                                                                                                                                                                                                                                                                                                                                                                                                                                                                                                                                                                                                                                                                                                                                                                                                                                                                                                                                                                                                                                                                                                                                                                                                                                                                                                                                                                                                                                                                                                                                                                                                                                                                                                                                                                                                                                                                                                                                                                                                                                                                                                                                                                                                                                                                                                                                                                                                                                                                                                                                                                                                                                                                                                                                                                                                                                                                                                                                                                                                                                                                                                                                                                                                                                                                                                                                                                                                                                                                                                                                                                                                                                                                                                                                                                                                                                                                                                                                                                                                                                                                                                                                                                                                                                                                                                                                                                                                                                                                                                                                                                                                                                                                                                                                                                                                                                                                                                                                                                                                                                                                                                                                                                                                                                                                                                                                                                                                                                                                                                                                                                                                                                                                                                                                                                                                                                                                                                                                                                                                                                                                                                                                                                                                                                                                                                                                                                                                                                                                                                                                                                                                                                                                                                                                                                                                                                                                                                                                                                                                                                                                                                                                                                                                                                                                                                                                                                                                                                                                                                                                                                                                                                                                                                                                                                                                                                                                                                                                                                                                                                                                                                                                                                                                                                                                                                                                                                                                                                                                                                                                                                                                                                                                                                                                                                                                                                                                                                                                                                                                                                                                                                                                                                                                                                                                                                                                                                                                                                                                                                                          | LESP Ciudad de Mexico                                            | Instituto de Diagnostico y Referencia Epidemiologicos (INDRE)                                                          | Abril Rodriguez-Maldonado; Ariadna Medina-Benitez; Claudia Wong-Arambula; Ernesto Ramirez-Gonzalez.; Gisela Barrera-Badillo; Irma Lopez-Martinez; Joaquin Quiroz-Mercado; Lucia Hernandez-Rivas; Natividad Cruz-Ortiz; Sergio Rangel-Guerrero; Tatiana Nunez-Garcia; Vanessa Rivero-Arredondo                                                                                                                                                                                                                                                                            |                                                                                                                                                                                                                                                                                               |
| EPI_ISL_1365662, EPI_ISL_1365663, EPI_ISL_1365664, EPI_ISL_1365665, EPI_ISL_1365666, EPI_ISL_1365667, EPI_ISL_1399278, EPI_ISL_1424044, EPI_ISL_1424045                                                                                                                                                                                                                                                                                                                                                                                                                                                                                                                                                                                                                                                                                                                                                                                                                                                                                                                                                                                                                                                                                                                                                                                                                                                                                                                                                                                                                                                                                                                                                                                                                                                                                                                                                                                                                                                                                                                                                                                                                                                                                                                                                                                                                                                                                                                                                                                                                                                                                                                                                                                                                                                                                                                                                                                                                                                                                                                                                                                                                                                                                                                                                                                                                                                                                                                                                                                                                                                                                                                                                                                                                                                                                                                                                                                                                                                                                                                                                                                                                                                                                                                                                                                                                                                                                                                                                                                                                                                                                                                                                                                                                                                                                                                                                                                                                                                                                                                                                                                                                                                                                                                                                                                                                                                                                                                                                                                                                                                                                                                                                                                                                                                                                                                                                                                                                                                                                                                                                                                                                                                                                                                                                                                                                                                                                                                                                                                                                                                                                                                                                                                                                                                                                                                                                                                                                                                                                                                                                                                                                                                                                                                                                                                                                                                                                                                                                                                                                                                                                                                                                                                                                                                                                                                                                                                                                                                                                                                                                                                                                                                                                                                                                                                                                                                                                                                                                                                                                                                                                                                                                                                                                                                                                                                                                                                                                                                                                                                                                                                                                                                                                                                                                                                                                                                                                                                                                                                                                                                                                                                                                                                                                                                                                                                                                                                                                                                                                                                                                                                                                                                                                                                                                                                                                                                                                                                                                                                                                                                                                                                                                                                                                                                                                                                                                                                                                                                                                                                                                                                                                                                                                                                                                                                                                                                                                                                                                                                                                                                                                                                                                                                                                                                                                                                                                                                                                                                                                                                                                                                                                                                                                                                                                                                | see above                                                        | LESP Coahuila                                                                                                          | Instituto de Diagnostico y Referencia Epidemiologicos (INDRE)                                                                                                                                                                                                                                                                                                                                                                                                                                                                                                            | Abril Rodriguez-Maldonado; Ariadna Medina-Benitez; Claudia Wong-Arambula; Ernesto Ramirez-Gonzalez.; Gisela Barrera-Badillo; Irma Lopez-Martinez; Joaquin Quiroz-Mercado; Lucia Hernandez-Rivas; Natividad Cruz-Ortiz; Sergio Rangel-Guerrero; Tatiana Nunez-Garcia; Vanessa Rivero-Arredondo |
| EPI_ISL_1337395                                                                                                                                                                                                                                                                                                                                                                                                                                                                                                                                                                                                                                                                                                                                                                                                                                                                                                                                                                                                                                                                                                                                                                                                                                                                                                                                                                                                                                                                                                                                                                                                                                                                                                                                                                                                                                                                                                                                                                                                                                                                                                                                                                                                                                                                                                                                                                                                                                                                                                                                                                                                                                                                                                                                                                                                                                                                                                                                                                                                                                                                                                                                                                                                                                                                                                                                                                                                                                                                                                                                                                                                                                                                                                                                                                                                                                                                                                                                                                                                                                                                                                                                                                                                                                                                                                                                                                                                                                                                                                                                                                                                                                                                                                                                                                                                                                                                                                                                                                                                                                                                                                                                                                                                                                                                                                                                                                                                                                                                                                                                                                                                                                                                                                                                                                                                                                                                                                                                                                                                                                                                                                                                                                                                                                                                                                                                                                                                                                                                                                                                                                                                                                                                                                                                                                                                                                                                                                                                                                                                                                                                                                                                                                                                                                                                                                                                                                                                                                                                                                                                                                                                                                                                                                                                                                                                                                                                                                                                                                                                                                                                                                                                                                                                                                                                                                                                                                                                                                                                                                                                                                                                                                                                                                                                                                                                                                                                                                                                                                                                                                                                                                                                                                                                                                                                                                                                                                                                                                                                                                                                                                                                                                                                                                                                                                                                                                                                                                                                                                                                                                                                                                                                                                                                                                                                                                                                                                                                                                                                                                                                                                                                                                                                                                                                                                                                                                                                                                                                                                                                                                                                                                                                                                                                                                                                                                                                                                                                                                                                                                                                                                                                                                                                                                                                                                                                                                                                                                                                                                                                                                                                                                                                                                                                                                                                                                                        | LESP Colima                                                      | Instituto de Diagnostico y Referencia Epidemiologicos (INDRE)                                                          | Abril Rodriguez-Maldonado; Ariadna Medina-Benitez; Claudia Wong-Arambula; Ernesto Ramirez-Gonzalez.; Gisela Barrera-Badillo; Irma Lopez-Martinez; Joaquin Quiroz-Mercado; Lucia Hernandez-Rivas; Natividad Cruz-Ortiz; Sergio Rangel-Guerrero; Tatiana Nunez-Garcia; Vanessa Rivero-Arredondo                                                                                                                                                                                                                                                                            |                                                                                                                                                                                                                                                                                               |
| EPI_ISL_1334386, EPI_ISL_1337363, EPI_ISL_1337365, EPI_ISL_1337367, EPI_ISL_1337376, EPI_ISL_1337377, EPI_ISL_1337379, EPI_ISL_1337380, EPI_ISL_1337382, EPI_ISL_1337383, EPI_ISL_1337384, EPI_ISL_1337386, EPI_ISL_1337387, EPI_ISL_1340608, EPI_ISL_1340610, EPI_ISL_1340611, EPI_ISL_1340614, EPI_ISL_1340616, EPI_ISL_1340617, EPI_ISL_1340624, EPI_ISL_1340626, EPI_ISL_1340627, EPI_ISL_1340630, EPI_ISL_1340631, EPI_ISL_1340633, EPI_ISL_1340634, EPI_ISL_1340643, EPI_ISL_1340644, EPI_ISL_1340646, EPI_ISL_1340647, EPI_ISL_1340648, EPI_ISL_1340650, EPI_ISL_1359070, EPI_ISL_1359071, EPI_ISL_1359072, EPI_ISL_1359073, EPI_ISL_1359074, EPI_ISL_1359075, EPI_ISL_1359076, EPI_ISL_1359077, EPI_ISL_1359078, EPI_ISL_1359079, EPI_ISL_1359080, EPI_ISL_1359081, EPI_ISL_1359082, EPI_ISL_1359083, EPI_ISL_1359084, EPI_ISL_1359085, EPI_ISL_1359086, EPI_ISL_1359087, EPI_ISL_1359088, EPI_ISL_1359089, EPI_ISL_1359090, EPI_ISL_1359091, EPI_ISL_1359092, EPI_ISL_1359093, EPI_ISL_1359094, EPI_ISL_1359095, EPI_ISL_1359096, EPI_ISL_1359097, EPI_ISL_1359098, EPI_ISL_1359099, EPI_ISL_1359100, EPI_ISL_1359101, EPI_ISL_1359102, EPI_ISL_1359103, EPI_ISL_1359104, EPI_ISL_1359105, EPI_ISL_1359106, EPI_ISL_1359107, EPI_ISL_1359108, EPI_ISL_1359109, EPI_ISL_1359110, EPI_ISL_1359111, EPI_ISL_1359112, EPI_ISL_1359113, EPI_ISL_1359114, EPI_ISL_1359115, EPI_ISL_1359116, EPI_ISL_1359117, EPI_ISL_1359118, EPI_ISL_1359119, EPI_ISL_1359120, EPI_ISL_1359121, EPI_ISL_1359122, EPI_ISL_1359123, EPI_ISL_1359124, EPI_ISL_1359125, EPI_ISL_1359126, EPI_ISL_1359127, EPI_ISL_1359128, EPI_ISL_1359129, EPI_ISL_1359130, EPI_ISL_1359131, EPI_ISL_1359132, EPI_ISL_1359133, EPI_ISL_1359134, EPI_ISL_1359135, EPI_ISL_1359136, EPI_ISL_1359137, EPI_ISL_1359138, EPI_ISL_1359139, EPI_ISL_1359140, EPI_ISL_1359141, EPI_ISL_1359142, EPI_ISL_1359143, EPI_ISL_1359144, EPI_ISL_1359145, EPI_ISL_1359146, EPI_ISL_1359147, EPI_ISL_1359148, EPI_ISL_1359149, EPI_ISL_1359150, EPI_ISL_1359151, EPI_ISL_1359152, EPI_ISL_1359153, EPI_ISL_1359154, EPI_ISL_1359155, EPI_ISL_1359156, EPI_ISL_1359157, EPI_ISL_1359158, EPI_ISL_1359159, EPI_ISL_1359160, EPI_ISL_1359161, EPI_ISL_1359162, EPI_ISL_1359163, EPI_ISL_1359164, EPI_ISL_1359165, EPI_ISL_1359166, EPI_ISL_1359167, EPI_ISL_1359168, EPI_ISL_1359169, EPI_ISL_1359170, EPI_ISL_1359171, EPI_ISL_1359172, EPI_ISL_1359173, EPI_ISL_1359174, EPI_ISL_1359175, EPI_ISL_1359176, EPI_ISL_1359177, EPI_ISL_1359178, EPI_ISL_1359179, EPI_ISL_1359180, EPI_ISL_1359181, EPI_ISL_1359182, EPI_ISL_1359183, EPI_ISL_1359184, EPI_ISL_1359185, EPI_ISL_1359186, EPI_ISL_1359187, EPI_ISL_1359188, EPI_ISL_1359189, EPI_ISL_1359190, EPI_ISL_1359191, EPI_ISL_1359192, EPI_ISL_1359193, EPI_ISL_1359194, EPI_ISL_1359195, EPI_ISL_1359196, EPI_ISL_1359197, EPI_ISL_1359198, EPI_ISL_1359199, EPI_ISL_1359200, EPI_ISL_1359201, EPI_ISL_1359202, EPI_ISL_1359203, EPI_ISL_1359204, EPI_ISL_1359205, EPI_ISL_1359206, EPI_ISL_1359207, EPI_ISL_1359208, EPI_ISL_1359209, EPI_ISL_1359210, EPI_ISL_1359211, EPI_ISL_1359212, EPI_ISL_1359213, EPI_ISL_1359214, EPI_ISL_1359215, EPI_ISL_1359216, EPI_ISL_1359217, EPI_ISL_1359218, EPI_ISL_1359219, EPI_ISL_1359220, EPI_ISL_1359221, EPI_ISL_1359222, EPI_ISL_1359223, EPI_ISL_1359224, EPI_ISL_1359225, EPI_ISL_1359226, EPI_ISL_1359227, EPI_ISL_1359228, EPI_ISL_1359229, EPI_ISL_1359230, EPI_ISL_1359231, EPI_ISL_1359232, EPI_ISL_1359233, EPI_ISL_1359234, EPI_ISL_1359235, EPI_ISL_1359236, EPI_ISL_1359237, EPI_ISL_1359238, EPI_ISL_1359239, EPI_ISL_1359240, EPI_ISL_1359241, EPI_ISL_1359242, EPI_ISL_1359243, EPI_ISL_1359244, EPI_ISL_1359245, EPI_ISL_1359246, EPI_ISL_1359247, EPI_ISL_1359248, EPI_ISL_1359249, EPI_ISL_1359250, EPI_ISL_1359251, EPI_ISL_1359252, EPI_ISL_1359253, EPI_ISL_1359254, EPI_ISL_1359255, EPI_ISL_1359256, EPI_ISL_1359257, EPI_ISL_1359258, EPI_ISL_1359259, EPI_ISL_1359260, EPI_ISL_1359261, EPI_ISL_1359262, EPI_ISL_1359263, EPI_ISL_1359264, EPI_ISL_1359265, EPI_ISL_1359266, EPI_ISL_1359267, EPI_ISL_1359268, EPI_ISL_1359269, EPI_ISL_1359270, EPI_ISL_1359271, EPI_ISL_1359272, EPI_ISL_1359273, EPI_ISL_1359274, EPI_ISL_1359275, EPI_ISL_1359276, EPI_ISL_1359277, EPI_ISL_1359278, EPI_ISL_1359279, EPI_ISL_1359280, EPI_ISL_1359281, EPI_ISL_1359282, EPI_ISL_1359283, EPI_ISL_1359284, EPI_ISL_1359285, EPI_ISL_1359286, EPI_ISL_1359287, EPI_ISL_1359288, EPI_ISL_1359289, EPI_ISL_1359290, EPI_ISL_1359291, EPI_ISL_1359292, EPI_ISL_1359293, EPI_ISL_1359294, EPI_ISL_1359295, EPI_ISL_1359296, EPI_ISL_1359297, EPI_ISL_1359298, EPI_ISL_1359299, EPI_ISL_1359300, EPI_ISL_1359301, EPI_ISL_1359302, EPI_ISL_1359303, EPI_ISL_1359304, EPI_ISL_1359305, EPI_ISL_1359306, EPI_ISL_1359307, EPI_ISL_1359308, EPI_ISL_1359309, EPI_ISL_1359310, EPI_ISL_1359311, EPI_ISL_1359312, EPI_ISL_1359313, EPI_ISL_1359314, EPI_ISL_1359315, EPI_ISL_1359316, EPI_ISL_1359317, EPI_ISL_1359318, EPI_ISL_1359319, EPI_ISL_1359320, EPI_ISL_1359321, EPI_ISL_1359322, EPI_ISL_1359323, EPI_ISL_1359324, EPI_ISL_1359325, EPI_ISL_1359326, EPI_ISL_1359327, EPI_ISL_1359328, EPI_ISL_1359329, EPI_ISL_1359330, EPI_ISL_1359331, EPI_ISL_1359332, EPI_ISL_1359333, EPI_ISL_1359334, EPI_ISL_1359335, EPI_ISL_1359336, EPI_ISL_1359337, EPI_ISL_1359338, EPI_ISL_1359339, EPI_ISL_1359340, EPI_ISL_1359341, EPI_ISL_1359342, EPI_ISL_1359343, EPI_ISL_1359344, EPI_ISL_1359345, EPI_ISL_1359346, EPI_ISL_1359347, EPI_ISL_1359348, EPI_ISL_1359349, EPI_ISL_1359350, EPI_ISL_1359351, EPI_ISL_1359352, EPI_ISL_1359353, EPI_ISL_1359354, EPI_ISL_1359355, EPI_ISL_1359356, EPI_ISL_1359357, EPI_ISL_1359358, EPI_ISL_1359359, EPI_ISL_1359360, EPI_ISL_1359361, EPI_ISL_1359362, EPI_ISL_1359363, EPI_ISL_1359364, EPI_ISL_1359365, EPI_ISL_1359366, EPI_ISL_1359367, EPI_ISL_1359368, EPI_ISL_1359369, EPI_ISL_1359370, EPI_ISL_1359371, EPI_ISL_1359372, EPI_ISL_1359373, EPI_ISL_1359374, EPI_ISL_1359375, EPI_ISL_1359376, EPI_ISL_1359377, EPI_ISL_1359378, EPI_ISL_1359379, EPI_ISL_1359380, EPI_ISL_1359381, EPI_ISL_1359382, EPI_ISL_1359383, EPI_ISL_1359384, EPI_ISL_1359385, EPI_ISL_1359386, EPI_ISL_1359387, EPI_ISL_1359388, EPI_ISL_1359389, EPI_ISL_1359390, EPI_ISL_1359391, EPI_ISL_1359392, EPI_ISL_1359393, EPI_ISL_1359394, EPI_ISL_1359395, EPI_ISL_1359396, EPI_ISL_1359397, EPI_ISL_1359398, EPI_ISL_1359399, EPI_ISL_1359400, EPI_ISL_1359401, EPI_ISL_1359402, EPI_ISL_1359403, EPI_ISL_1359404, EPI_ISL_1359405, EPI_ISL_1359406, EPI_ISL_1359407, EPI_ISL_1359408, EPI_ISL_1359409, EPI_ISL_1359410, EPI_ISL_1359411, EPI_ISL_1359412, EPI_ISL_1359413, EPI_ISL_1359414, EPI_ISL_1359415, EPI_ISL_1359416, EPI_ISL_1359417, EPI_ISL_1359418, EPI_ISL_1359419, EPI_ISL_1359420, EPI_ISL_1359421, EPI_ISL_1359422, EPI_ISL_1359423, EPI_ISL_1359424, EPI_ISL_1359425, EPI_ISL_1359426, EPI_ISL_1359427, EPI_ISL_1359428, EPI_ISL_1359429, EPI_ISL_1359430, EPI_ISL_1359431, EPI_ISL_1359432, EPI_ISL_1359433, EPI_ISL_1359434, EPI_ISL_1359435, EPI_ISL_1359436, EPI_ISL_1359437, EPI_ISL_1359438, EPI_ISL_1359439, EPI_ISL_1359440, EPI_ISL_1359441, EPI_ISL_1359442, EPI_ISL_1359443, EPI_ISL_1359444, EPI_ISL_1359445, EPI_ISL_1359446, EPI_ISL_1359447, EPI_ISL_1359448, EPI_ISL_1359449, EPI_ISL_1359450, EPI_ISL_1359451, EPI_ISL_1359452, EPI_ISL_1359453, EPI_ISL_1359454, EPI_ISL_1359455, EPI_ISL_1359456, EPI_ISL_1359457, EPI_ISL_1359458, EPI_ISL_1359459, EPI_ISL_1359460, EPI_ISL_1359461, EPI_ISL_1359462, EPI_ISL_1359463, EPI_ISL_1359464, EPI_ISL_1359465, EPI_ISL_1359466, EPI_ISL_1359467, EPI_ISL_1359468, EPI_ISL_1359469, EPI_ISL_1359470, EPI_ISL_1359471, EPI_ISL_1359472, EPI_ISL_1359473, EPI_ISL_1359474, EPI_ISL_1359475, EPI_ISL_1359476, EPI_ISL_1359477, EPI_ISL_1359478, EPI_ISL_1359479, EPI_ISL_1359480, EPI_ISL_1359481, EPI_ISL_1359482, EPI_ISL_1359483, EPI_ISL_1359484, EPI_ISL_1359485, EPI_ISL_1359486, EPI_ISL_1359487, EPI_ISL_1359488, EPI_ISL_1359489, EPI_ISL_1359490, EPI_ISL_1359491, EPI_ISL_1359492, EPI_ISL_1359493, EPI_ISL_1359494, EPI_ISL_1359495, EPI_ISL_1359496, EPI_ISL_1359497, EPI_ISL_1359498, EPI_ISL_1359499, EPI_ISL_1359500, EPI_ISL_1359501, EPI_ISL_1359502, EPI_ISL_1359503, EPI_ISL_1359504, EPI_ISL_1359505, EPI_ISL_1359506, EPI_ISL_1359507, EPI_ISL_1359508, EPI_ISL_1359509, EPI_ISL_1359510, EPI_ISL_1359511, EPI_ISL_1359512, EPI_ISL_1359513, EPI_ISL_1359514, EPI_ISL_1359515, EPI_ISL_1359516, EPI_ISL_1359517, EPI_ISL_1359518, EPI_ISL_1359519, EPI_ISL_1359520, EPI_ISL_1359521, EPI_ISL_1359522, EPI_ISL_1359523, EPI_ISL_1359524, EPI_ISL_1359525, EPI_ISL_1359526, EPI_ISL_1359527, EPI_ISL_1359528, EPI_ISL_1359529, EPI_ISL_1359530, EPI_ISL_1359531, EPI_ISL_1359532, EPI_ISL_1359533, EPI_ISL_1359534, EPI_ISL_1359535, EPI_ISL_1359536, EPI_ISL_1359537, EPI_ISL_1359538, EPI_ISL_1359539, EPI_ISL_1359540, EPI_ISL_1359541, EPI_ISL_1359542, EPI_ISL_1359543, EPI_ISL_1359544, EPI_ISL_1359545, EPI_ISL_1359546, EPI_ISL_1359547, EPI_ISL_1359548, EPI_ISL_1359549, EPI_ISL_1359550, EPI_ISL_1359551, EPI_ISL_1359552, EPI_ISL_1359553, EPI_ISL_1359554, EPI_ISL_1359555, EPI_ISL_1359556, EPI_ISL_1359557, EPI_ISL_1359558, EPI_ISL_1359559, EPI_ISL_1359560, EPI_ISL_1359561, EPI_ISL_1359562, EPI_ISL_1359563, EPI_ISL_1359564, EPI_ISL_1359565, EPI_ISL_1359566, EPI_ISL_1359567, EPI_ISL_1359568, EPI_ISL_1359569, EPI_ISL_1359570, EPI_ISL_1359571, EPI_ISL_1359572, EPI_ISL_1359573, EPI_ISL_1359574, EPI_ISL_1359575, EPI_ISL_1359576, EPI_ISL_1359577, EPI_ISL_1359578, EPI_ISL_1359579, EPI_ISL_1359580, EPI_ISL_1359581, EPI_ISL_1359582, EPI_ISL_1359583, EPI_ISL_1359584, EPI_ISL_1359585, EPI_ISL_1359586, EPI_ISL_1359587, EPI_ISL_1359588, EPI_ISL_1359589, EPI_ISL_1359590, EPI_ISL_1359591, EPI_ISL_1359592, EPI_ISL_1359593, EPI_ISL_1359594, EPI_ISL_1359595, EPI_ISL_1359596, EPI_ISL_1359597, EPI_ISL_1359598, EPI_ISL_1359599, EPI_ISL_1359600, EPI_ISL_1359601, EPI_ISL_1359602, EPI_ISL_1359603, EPI_ISL_1359604, EPI_ISL_1359605, EPI_ISL_1359606, EPI_ISL_1359607, EPI_ISL_1359608, EPI_ISL_1359609, EPI_ISL_1359610, EPI_ISL_1359611, EPI_ISL_1359612, EPI_ISL_1359613, EPI_ISL_1359614, EPI_ISL_1359615, EPI_ISL_1359616, EPI_ISL_1359617, EPI_ISL_1359618, EPI_ISL_1359619, EPI_ISL_1359620, EPI_ISL_1359621, EPI_ISL_1359622, EPI_ISL_1359623, EPI_ISL_1359624, EPI_ISL_1359625, EPI_ISL_1359626, EPI_ISL_1359627, EPI_ISL_1359628, EPI_ISL_1359629, EPI_ISL_1359630, EPI_ISL_1359631, EPI_ISL_1359632, EPI_ISL_1359633, EPI_ISL_1359634, EPI_ISL_1359635, EPI_ISL_1359636, EPI_ISL_1359637, EPI_ISL_1359638, EPI_ISL_1359639, EPI_ISL_1359640, EPI_ISL_1359641, EPI_ISL_1359642, EPI_ISL_1359643, EPI_ISL_1359644, EPI_ISL_1359645, EPI_ISL_1359646, EPI_ISL_1359647, EPI_ISL_1359648, EPI_ISL_1359649, EPI_ISL_1359650, EPI_ISL_1359651, EPI_ISL_1359652, EPI_ISL_1359653, EPI_ISL_1359654, EPI_ISL_1359655, EPI_ISL_1359656, EPI_ISL_1359657, EPI_ISL_1359658, EPI_ISL_1359659, EPI_ISL_1359660, EPI_ISL_1359661, EPI_ISL_1359662, EPI_ISL_1359663, EPI_ISL_1359664, EPI_ISL_1359665, EPI_ISL_1359666, EPI_ISL_1359667, EPI_ISL_1359668, EPI_ISL_1359669, EPI_ISL_1359670, EPI_ISL_1359671, EPI_ISL_1359672, EPI_ISL_1359673, EPI_ISL_1359674, EPI_ISL_1359675, EPI_ISL_1359676, EPI_ISL_1359677, EPI_ISL_1359678, EPI_ISL_1359679, EPI_ISL_1359680, EPI_ISL_1359681, EPI_ISL_1359682, EPI_ISL_1359683, EPI_ISL_1359684, EPI_ISL_1359685, EPI_ISL_1359686, EPI_ISL_1359687, EPI_ISL_1359688, EPI_ISL_1359689, EPI_ISL_1359690, EPI_ISL_1359691, EPI_ISL_1359692, EPI_ISL_1359693, EPI_ISL_1359694, EPI_ISL_1359695, EPI_ISL_1359696, EPI_ISL_1359697, EPI_ISL_1359698, EPI_ISL_1359699, EPI_ISL_1359700, EPI_ISL_1359701, EPI_ISL_1359702, EPI_ISL_1359703, EPI_ISL_1359704, EPI_ISL_1359705, EPI_ISL_1359706, EPI_ISL_1359707, EPI_ISL_1359708, EPI_ISL_1359709, EPI_ISL_1359710, EPI_ISL_1359711, EPI_ISL_1359712, EPI_ISL_1359713, EPI_ISL_1359714, EPI_ISL_1359715, EPI_ISL_1359716, EPI_ISL_1359717, EPI_ISL_1359718, EPI_ISL_1359719, EPI_ISL_1359720, EPI_ISL_1359721, EPI_ISL_1359722, EPI_ISL_1359723, EPI_ISL_1359724, EPI_ISL_1359725, EPI_ISL_1359726, EPI_ISL_1359727, EPI_ISL_1359728, EPI_ISL_1359729, EPI_ISL_1359730, EPI_ISL_1359731, EPI_ISL_1359732, EPI_ISL_1359733, EPI_ISL_135973 |                                                                  |                                                                                                                        |                                                                                                                                                                                                                                                                                                                                                                                                                                                                                                                                                                          |                                                                                                                                                                                                                                                                                               |

|                                                                                                                                                                                                                                                                                                                                                                                                                                                                                                                                                                                                                                                                                                                                                                                                                                                                                                                                                                                                                                                                                                                                                                                                                                                                                                                                                                                                                                                                                                                                                                                                                                                                                                                                                                                                                                                                                                                                                                                                                                                                                                                                                                                                                                                                                                                                                                                                                                                                                                                                                                                                                                                                                                                                                                                                                                                                                                                                                                                                                                                                                                                                                                                                                                                                                                                                                                                                                                                                                                                                                                                                                                                                                                                                                                                                                                                                                                                                                                                                                                                                                                                                                                                                                                                                                                                                                                                                                                                                                                                                                                                                                                                                                                                                                                                                                                                                                                                                                                                                                                                                                                                                                                                                                                                                                                                                                                                                                                                                                                                                                                                                                                                                                                                                                                                                                                                                                                                                                                                                                                                                                                                                                                                                                                                                                                                                                                                                                                                                                                                                                                                                                                                                                                                                                                                                                                                                                                                                                                                                                                                                                                                                                                                                                                                                                                                                                                                                                                                                                                                                                                                                                                                                                                                                                                                                                                                                                                                                                                                                                                                                                                                                                                                                                                                                                                                                                                                                                                                                                                                                                                                                                                                                                                                                                                                                                                                                                                                                                                                                                                                                                                                                                                                                                                                                                                                                                                                                                                                                                                                                                                                                                                                                                                                                                                                                                                                                                                                                                                                                                                                                                                                                                                                                                                                                                                                                                                                                                                                                                                                                                                                                                                                                                                                                                                                                                                                                                                                                                                                                                                                                                                                                                                                                                                                                                                                                                                                                                                                                                                                                                                                                                                                                                                                                                                                                        |                                                                                                      |                                                                                            |                                                                                                                                                                                                                                                                                                                                                                                                                                                                                                                                                                                                                                                                                                                                                                                        |                                                                                                                                                                                                                                                                                               |
|--------------------------------------------------------------------------------------------------------------------------------------------------------------------------------------------------------------------------------------------------------------------------------------------------------------------------------------------------------------------------------------------------------------------------------------------------------------------------------------------------------------------------------------------------------------------------------------------------------------------------------------------------------------------------------------------------------------------------------------------------------------------------------------------------------------------------------------------------------------------------------------------------------------------------------------------------------------------------------------------------------------------------------------------------------------------------------------------------------------------------------------------------------------------------------------------------------------------------------------------------------------------------------------------------------------------------------------------------------------------------------------------------------------------------------------------------------------------------------------------------------------------------------------------------------------------------------------------------------------------------------------------------------------------------------------------------------------------------------------------------------------------------------------------------------------------------------------------------------------------------------------------------------------------------------------------------------------------------------------------------------------------------------------------------------------------------------------------------------------------------------------------------------------------------------------------------------------------------------------------------------------------------------------------------------------------------------------------------------------------------------------------------------------------------------------------------------------------------------------------------------------------------------------------------------------------------------------------------------------------------------------------------------------------------------------------------------------------------------------------------------------------------------------------------------------------------------------------------------------------------------------------------------------------------------------------------------------------------------------------------------------------------------------------------------------------------------------------------------------------------------------------------------------------------------------------------------------------------------------------------------------------------------------------------------------------------------------------------------------------------------------------------------------------------------------------------------------------------------------------------------------------------------------------------------------------------------------------------------------------------------------------------------------------------------------------------------------------------------------------------------------------------------------------------------------------------------------------------------------------------------------------------------------------------------------------------------------------------------------------------------------------------------------------------------------------------------------------------------------------------------------------------------------------------------------------------------------------------------------------------------------------------------------------------------------------------------------------------------------------------------------------------------------------------------------------------------------------------------------------------------------------------------------------------------------------------------------------------------------------------------------------------------------------------------------------------------------------------------------------------------------------------------------------------------------------------------------------------------------------------------------------------------------------------------------------------------------------------------------------------------------------------------------------------------------------------------------------------------------------------------------------------------------------------------------------------------------------------------------------------------------------------------------------------------------------------------------------------------------------------------------------------------------------------------------------------------------------------------------------------------------------------------------------------------------------------------------------------------------------------------------------------------------------------------------------------------------------------------------------------------------------------------------------------------------------------------------------------------------------------------------------------------------------------------------------------------------------------------------------------------------------------------------------------------------------------------------------------------------------------------------------------------------------------------------------------------------------------------------------------------------------------------------------------------------------------------------------------------------------------------------------------------------------------------------------------------------------------------------------------------------------------------------------------------------------------------------------------------------------------------------------------------------------------------------------------------------------------------------------------------------------------------------------------------------------------------------------------------------------------------------------------------------------------------------------------------------------------------------------------------------------------------------------------------------------------------------------------------------------------------------------------------------------------------------------------------------------------------------------------------------------------------------------------------------------------------------------------------------------------------------------------------------------------------------------------------------------------------------------------------------------------------------------------------------------------------------------------------------------------------------------------------------------------------------------------------------------------------------------------------------------------------------------------------------------------------------------------------------------------------------------------------------------------------------------------------------------------------------------------------------------------------------------------------------------------------------------------------------------------------------------------------------------------------------------------------------------------------------------------------------------------------------------------------------------------------------------------------------------------------------------------------------------------------------------------------------------------------------------------------------------------------------------------------------------------------------------------------------------------------------------------------------------------------------------------------------------------------------------------------------------------------------------------------------------------------------------------------------------------------------------------------------------------------------------------------------------------------------------------------------------------------------------------------------------------------------------------------------------------------------------------------------------------------------------------------------------------------------------------------------------------------------------------------------------------------------------------------------------------------------------------------------------------------------------------------------------------------------------------------------------------------------------------------------------------------------------------------------------------------------------------------------------------------------------------------------------------------------------------------------------------------------------------------------------------------------------------------------------------------------------------------------------------------------------------------------------------------------------------------------------------------------------------------------------------------------------------------------------------------------------------------------------------------------------------------------------------------------------------------------------------------------------------------------------------------------------------------------------------------------------------------------------------------------------------------------------------------------------------------------------------------------------------------------------------------------------------------------------------------------------------------------------------------------------------------------------------------------------------------------------------------------------------------------------------------------------------------------------------------------------------------------------------------------------------------------------------------------------------------------------------------------------------------------------------------------------------------------------------------------------------------------------------------------------------------------------------------------------------------------------------------------------------------------------------------------------------------------------------------------------------------------------------------------------------------------------------------------------------------------------------------------------------------------------------------------------------------------------------------------------------------------------------------------------------------------------------------------------------------------------------------------------------------|------------------------------------------------------------------------------------------------------|--------------------------------------------------------------------------------------------|----------------------------------------------------------------------------------------------------------------------------------------------------------------------------------------------------------------------------------------------------------------------------------------------------------------------------------------------------------------------------------------------------------------------------------------------------------------------------------------------------------------------------------------------------------------------------------------------------------------------------------------------------------------------------------------------------------------------------------------------------------------------------------------|-----------------------------------------------------------------------------------------------------------------------------------------------------------------------------------------------------------------------------------------------------------------------------------------------|
| see above                                                                                                                                                                                                                                                                                                                                                                                                                                                                                                                                                                                                                                                                                                                                                                                                                                                                                                                                                                                                                                                                                                                                                                                                                                                                                                                                                                                                                                                                                                                                                                                                                                                                                                                                                                                                                                                                                                                                                                                                                                                                                                                                                                                                                                                                                                                                                                                                                                                                                                                                                                                                                                                                                                                                                                                                                                                                                                                                                                                                                                                                                                                                                                                                                                                                                                                                                                                                                                                                                                                                                                                                                                                                                                                                                                                                                                                                                                                                                                                                                                                                                                                                                                                                                                                                                                                                                                                                                                                                                                                                                                                                                                                                                                                                                                                                                                                                                                                                                                                                                                                                                                                                                                                                                                                                                                                                                                                                                                                                                                                                                                                                                                                                                                                                                                                                                                                                                                                                                                                                                                                                                                                                                                                                                                                                                                                                                                                                                                                                                                                                                                                                                                                                                                                                                                                                                                                                                                                                                                                                                                                                                                                                                                                                                                                                                                                                                                                                                                                                                                                                                                                                                                                                                                                                                                                                                                                                                                                                                                                                                                                                                                                                                                                                                                                                                                                                                                                                                                                                                                                                                                                                                                                                                                                                                                                                                                                                                                                                                                                                                                                                                                                                                                                                                                                                                                                                                                                                                                                                                                                                                                                                                                                                                                                                                                                                                                                                                                                                                                                                                                                                                                                                                                                                                                                                                                                                                                                                                                                                                                                                                                                                                                                                                                                                                                                                                                                                                                                                                                                                                                                                                                                                                                                                                                                                                                                                                                                                                                                                                                                                                                                                                                                                                                                                                                                              | LESP Queretaro                                                                                       | Instituto de Diagnostico y Referencia Epidemiologicos (INDRE)                              | Abril Rodriguez-Maldonado; Ariadna Medina-Benitez; Claudia Wong-Arambula; Ernesto Ramirez-Gonzalez.; Gisela Barrera-Badillo; Irma Lopez-Martinez; Joaquin Quiroz-Mercado; Lucia Hernandez-Rivas; Natividad Cruz-Ortiz; Sergio Rangel-Guerrero; Tatiana Nunez-Garcia; Vanessa Rivero-Arredondo                                                                                                                                                                                                                                                                                                                                                                                                                                                                                          |                                                                                                                                                                                                                                                                                               |
| EPI_ISL_1324767, EPI_ISL_1365661                                                                                                                                                                                                                                                                                                                                                                                                                                                                                                                                                                                                                                                                                                                                                                                                                                                                                                                                                                                                                                                                                                                                                                                                                                                                                                                                                                                                                                                                                                                                                                                                                                                                                                                                                                                                                                                                                                                                                                                                                                                                                                                                                                                                                                                                                                                                                                                                                                                                                                                                                                                                                                                                                                                                                                                                                                                                                                                                                                                                                                                                                                                                                                                                                                                                                                                                                                                                                                                                                                                                                                                                                                                                                                                                                                                                                                                                                                                                                                                                                                                                                                                                                                                                                                                                                                                                                                                                                                                                                                                                                                                                                                                                                                                                                                                                                                                                                                                                                                                                                                                                                                                                                                                                                                                                                                                                                                                                                                                                                                                                                                                                                                                                                                                                                                                                                                                                                                                                                                                                                                                                                                                                                                                                                                                                                                                                                                                                                                                                                                                                                                                                                                                                                                                                                                                                                                                                                                                                                                                                                                                                                                                                                                                                                                                                                                                                                                                                                                                                                                                                                                                                                                                                                                                                                                                                                                                                                                                                                                                                                                                                                                                                                                                                                                                                                                                                                                                                                                                                                                                                                                                                                                                                                                                                                                                                                                                                                                                                                                                                                                                                                                                                                                                                                                                                                                                                                                                                                                                                                                                                                                                                                                                                                                                                                                                                                                                                                                                                                                                                                                                                                                                                                                                                                                                                                                                                                                                                                                                                                                                                                                                                                                                                                                                                                                                                                                                                                                                                                                                                                                                                                                                                                                                                                                                                                                                                                                                                                                                                                                                                                                                                                                                                                                                                                                       | LESP Quintana Roo                                                                                    | Instituto de Diagnostico y Referencia Epidemiologicos (INDRE)                              | Abril Rodriguez-Maldonado; Ariadna Medina-Benitez; Claudia Wong-Arambula; Ernesto Ramirez-Gonzalez.; Gisela Barrera-Badillo; Irma Lopez-Martinez; Joaquin Quiroz-Mercado; Lucia Hernandez-Rivas; Natali Vega-Magana; Natividad Cruz-Ortiz; Sergio Rangel-Guerrero; Tatiana Nunez-Garcia; Vanessa Rivero-Arredondo                                                                                                                                                                                                                                                                                                                                                                                                                                                                      |                                                                                                                                                                                                                                                                                               |
| EPI_ISL_1337389                                                                                                                                                                                                                                                                                                                                                                                                                                                                                                                                                                                                                                                                                                                                                                                                                                                                                                                                                                                                                                                                                                                                                                                                                                                                                                                                                                                                                                                                                                                                                                                                                                                                                                                                                                                                                                                                                                                                                                                                                                                                                                                                                                                                                                                                                                                                                                                                                                                                                                                                                                                                                                                                                                                                                                                                                                                                                                                                                                                                                                                                                                                                                                                                                                                                                                                                                                                                                                                                                                                                                                                                                                                                                                                                                                                                                                                                                                                                                                                                                                                                                                                                                                                                                                                                                                                                                                                                                                                                                                                                                                                                                                                                                                                                                                                                                                                                                                                                                                                                                                                                                                                                                                                                                                                                                                                                                                                                                                                                                                                                                                                                                                                                                                                                                                                                                                                                                                                                                                                                                                                                                                                                                                                                                                                                                                                                                                                                                                                                                                                                                                                                                                                                                                                                                                                                                                                                                                                                                                                                                                                                                                                                                                                                                                                                                                                                                                                                                                                                                                                                                                                                                                                                                                                                                                                                                                                                                                                                                                                                                                                                                                                                                                                                                                                                                                                                                                                                                                                                                                                                                                                                                                                                                                                                                                                                                                                                                                                                                                                                                                                                                                                                                                                                                                                                                                                                                                                                                                                                                                                                                                                                                                                                                                                                                                                                                                                                                                                                                                                                                                                                                                                                                                                                                                                                                                                                                                                                                                                                                                                                                                                                                                                                                                                                                                                                                                                                                                                                                                                                                                                                                                                                                                                                                                                                                                                                                                                                                                                                                                                                                                                                                                                                                                                                                                                        | LESP Sinaloa                                                                                         | Instituto de Diagnostico y Referencia Epidemiologicos (INDRE)                              | Abril Rodriguez-Maldonado; Ariadna Medina-Benitez; Claudia Wong-Arambula; Ernesto Ramirez-Gonzalez.; Gisela Barrera-Badillo; Irma Lopez-Martinez; Joaquin Quiroz-Mercado; Lucia Hernandez-Rivas; Natividad Cruz-Ortiz; Sergio Rangel-Guerrero; Tatiana Nunez-Garcia; Vanessa Rivero-Arredondo                                                                                                                                                                                                                                                                                                                                                                                                                                                                                          |                                                                                                                                                                                                                                                                                               |
| EPI_ISL_1365649, EPI_ISL_1399275, EPI_ISL_1399276, EPI_ISL_1399277, EPI_ISL_1424039, EPI_ISL_1424040, EPI_ISL_1424041                                                                                                                                                                                                                                                                                                                                                                                                                                                                                                                                                                                                                                                                                                                                                                                                                                                                                                                                                                                                                                                                                                                                                                                                                                                                                                                                                                                                                                                                                                                                                                                                                                                                                                                                                                                                                                                                                                                                                                                                                                                                                                                                                                                                                                                                                                                                                                                                                                                                                                                                                                                                                                                                                                                                                                                                                                                                                                                                                                                                                                                                                                                                                                                                                                                                                                                                                                                                                                                                                                                                                                                                                                                                                                                                                                                                                                                                                                                                                                                                                                                                                                                                                                                                                                                                                                                                                                                                                                                                                                                                                                                                                                                                                                                                                                                                                                                                                                                                                                                                                                                                                                                                                                                                                                                                                                                                                                                                                                                                                                                                                                                                                                                                                                                                                                                                                                                                                                                                                                                                                                                                                                                                                                                                                                                                                                                                                                                                                                                                                                                                                                                                                                                                                                                                                                                                                                                                                                                                                                                                                                                                                                                                                                                                                                                                                                                                                                                                                                                                                                                                                                                                                                                                                                                                                                                                                                                                                                                                                                                                                                                                                                                                                                                                                                                                                                                                                                                                                                                                                                                                                                                                                                                                                                                                                                                                                                                                                                                                                                                                                                                                                                                                                                                                                                                                                                                                                                                                                                                                                                                                                                                                                                                                                                                                                                                                                                                                                                                                                                                                                                                                                                                                                                                                                                                                                                                                                                                                                                                                                                                                                                                                                                                                                                                                                                                                                                                                                                                                                                                                                                                                                                                                                                                                                                                                                                                                                                                                                                                                                                                                                                                                                                                                                  | see above                                                                                            | LESP Tamaulipas                                                                            | Instituto de Diagnostico y Referencia Epidemiologicos (INDRE)                                                                                                                                                                                                                                                                                                                                                                                                                                                                                                                                                                                                                                                                                                                          | Abril Rodriguez-Maldonado; Ariadna Medina-Benitez; Claudia Wong-Arambula; Ernesto Ramirez-Gonzalez.; Gisela Barrera-Badillo; Irma Lopez-Martinez; Joaquin Quiroz-Mercado; Lucia Hernandez-Rivas; Natividad Cruz-Ortiz; Sergio Rangel-Guerrero; Tatiana Nunez-Garcia; Vanessa Rivero-Arredondo |
| EPI_ISL_1365656, EPI_ISL_1366682, EPI_ISL_1366683, EPI_ISL_1366684, EPI_ISL_1366685, EPI_ISL_1366686, EPI_ISL_1399279, EPI_ISL_1424018, EPI_ISL_1424046, EPI_ISL_1424047, EPI_ISL_1424048, EPI_ISL_1424049                                                                                                                                                                                                                                                                                                                                                                                                                                                                                                                                                                                                                                                                                                                                                                                                                                                                                                                                                                                                                                                                                                                                                                                                                                                                                                                                                                                                                                                                                                                                                                                                                                                                                                                                                                                                                                                                                                                                                                                                                                                                                                                                                                                                                                                                                                                                                                                                                                                                                                                                                                                                                                                                                                                                                                                                                                                                                                                                                                                                                                                                                                                                                                                                                                                                                                                                                                                                                                                                                                                                                                                                                                                                                                                                                                                                                                                                                                                                                                                                                                                                                                                                                                                                                                                                                                                                                                                                                                                                                                                                                                                                                                                                                                                                                                                                                                                                                                                                                                                                                                                                                                                                                                                                                                                                                                                                                                                                                                                                                                                                                                                                                                                                                                                                                                                                                                                                                                                                                                                                                                                                                                                                                                                                                                                                                                                                                                                                                                                                                                                                                                                                                                                                                                                                                                                                                                                                                                                                                                                                                                                                                                                                                                                                                                                                                                                                                                                                                                                                                                                                                                                                                                                                                                                                                                                                                                                                                                                                                                                                                                                                                                                                                                                                                                                                                                                                                                                                                                                                                                                                                                                                                                                                                                                                                                                                                                                                                                                                                                                                                                                                                                                                                                                                                                                                                                                                                                                                                                                                                                                                                                                                                                                                                                                                                                                                                                                                                                                                                                                                                                                                                                                                                                                                                                                                                                                                                                                                                                                                                                                                                                                                                                                                                                                                                                                                                                                                                                                                                                                                                                                                                                                                                                                                                                                                                                                                                                                                                                                                                                                                                                                             | see above                                                                                            | LESP Veracruz                                                                              | Instituto de Diagnostico y Referencia Epidemiologicos (INDRE)                                                                                                                                                                                                                                                                                                                                                                                                                                                                                                                                                                                                                                                                                                                          | Abril Rodriguez-Maldonado; Ariadna Medina-Benitez; Claudia Wong-Arambula; Ernesto Ramirez-Gonzalez.; Gisela Barrera-Badillo; Irma Lopez-Martinez; Joaquin Quiroz-Mercado; Lucia Hernandez-Rivas; Natividad Cruz-Ortiz; Sergio Rangel-Guerrero; Tatiana Nunez-Garcia; Vanessa Rivero-Arredondo |
| EPI_ISL_1340658, EPI_ISL_1340661, EPI_ISL_1359066, EPI_ISL_1359067, EPI_ISL_1366666, EPI_ISL_1424007, EPI_ISL_1424014                                                                                                                                                                                                                                                                                                                                                                                                                                                                                                                                                                                                                                                                                                                                                                                                                                                                                                                                                                                                                                                                                                                                                                                                                                                                                                                                                                                                                                                                                                                                                                                                                                                                                                                                                                                                                                                                                                                                                                                                                                                                                                                                                                                                                                                                                                                                                                                                                                                                                                                                                                                                                                                                                                                                                                                                                                                                                                                                                                                                                                                                                                                                                                                                                                                                                                                                                                                                                                                                                                                                                                                                                                                                                                                                                                                                                                                                                                                                                                                                                                                                                                                                                                                                                                                                                                                                                                                                                                                                                                                                                                                                                                                                                                                                                                                                                                                                                                                                                                                                                                                                                                                                                                                                                                                                                                                                                                                                                                                                                                                                                                                                                                                                                                                                                                                                                                                                                                                                                                                                                                                                                                                                                                                                                                                                                                                                                                                                                                                                                                                                                                                                                                                                                                                                                                                                                                                                                                                                                                                                                                                                                                                                                                                                                                                                                                                                                                                                                                                                                                                                                                                                                                                                                                                                                                                                                                                                                                                                                                                                                                                                                                                                                                                                                                                                                                                                                                                                                                                                                                                                                                                                                                                                                                                                                                                                                                                                                                                                                                                                                                                                                                                                                                                                                                                                                                                                                                                                                                                                                                                                                                                                                                                                                                                                                                                                                                                                                                                                                                                                                                                                                                                                                                                                                                                                                                                                                                                                                                                                                                                                                                                                                                                                                                                                                                                                                                                                                                                                                                                                                                                                                                                                                                                                                                                                                                                                                                                                                                                                                                                                                                                                                                                                                  | see above                                                                                            | LESP Yucatan                                                                               | Instituto de Diagnostico y Referencia Epidemiologicos (INDRE)                                                                                                                                                                                                                                                                                                                                                                                                                                                                                                                                                                                                                                                                                                                          | Abril Rodriguez-Maldonado; Ariadna Medina-Benitez; Claudia Wong-Arambula; Ernesto Ramirez-Gonzalez.; Gisela Barrera-Badillo; Irma Lopez-Martinez; Joaquin Quiroz-Mercado; Lucia Hernandez-Rivas; Natividad Cruz-Ortiz; Sergio Rangel-Guerrero; Tatiana Nunez-Garcia; Vanessa Rivero-Arredondo |
| EPI_ISL_1340660, EPI_ISL_1359068, EPI_ISL_1359069                                                                                                                                                                                                                                                                                                                                                                                                                                                                                                                                                                                                                                                                                                                                                                                                                                                                                                                                                                                                                                                                                                                                                                                                                                                                                                                                                                                                                                                                                                                                                                                                                                                                                                                                                                                                                                                                                                                                                                                                                                                                                                                                                                                                                                                                                                                                                                                                                                                                                                                                                                                                                                                                                                                                                                                                                                                                                                                                                                                                                                                                                                                                                                                                                                                                                                                                                                                                                                                                                                                                                                                                                                                                                                                                                                                                                                                                                                                                                                                                                                                                                                                                                                                                                                                                                                                                                                                                                                                                                                                                                                                                                                                                                                                                                                                                                                                                                                                                                                                                                                                                                                                                                                                                                                                                                                                                                                                                                                                                                                                                                                                                                                                                                                                                                                                                                                                                                                                                                                                                                                                                                                                                                                                                                                                                                                                                                                                                                                                                                                                                                                                                                                                                                                                                                                                                                                                                                                                                                                                                                                                                                                                                                                                                                                                                                                                                                                                                                                                                                                                                                                                                                                                                                                                                                                                                                                                                                                                                                                                                                                                                                                                                                                                                                                                                                                                                                                                                                                                                                                                                                                                                                                                                                                                                                                                                                                                                                                                                                                                                                                                                                                                                                                                                                                                                                                                                                                                                                                                                                                                                                                                                                                                                                                                                                                                                                                                                                                                                                                                                                                                                                                                                                                                                                                                                                                                                                                                                                                                                                                                                                                                                                                                                                                                                                                                                                                                                                                                                                                                                                                                                                                                                                                                                                                                                                                                                                                                                                                                                                                                                                                                                                                                                                                                                                      | LESP Zacatecas                                                                                       | Instituto de Diagnostico y Referencia Epidemiologicos (INDRE)                              | Abril Rodriguez-Maldonado; Ariadna Medina-Benitez; Claudia Wong-Arambula; Ernesto Ramirez-Gonzalez.; Gisela Barrera-Badillo; Irma Lopez-Martinez; Joaquin Quiroz-Mercado; Lucia Hernandez-Rivas; Natividad Cruz-Ortiz; Sergio Rangel-Guerrero; Tatiana Nunez-Garcia; Vanessa Rivero-Arredondo                                                                                                                                                                                                                                                                                                                                                                                                                                                                                          |                                                                                                                                                                                                                                                                                               |
| EPI_ISL_1335757                                                                                                                                                                                                                                                                                                                                                                                                                                                                                                                                                                                                                                                                                                                                                                                                                                                                                                                                                                                                                                                                                                                                                                                                                                                                                                                                                                                                                                                                                                                                                                                                                                                                                                                                                                                                                                                                                                                                                                                                                                                                                                                                                                                                                                                                                                                                                                                                                                                                                                                                                                                                                                                                                                                                                                                                                                                                                                                                                                                                                                                                                                                                                                                                                                                                                                                                                                                                                                                                                                                                                                                                                                                                                                                                                                                                                                                                                                                                                                                                                                                                                                                                                                                                                                                                                                                                                                                                                                                                                                                                                                                                                                                                                                                                                                                                                                                                                                                                                                                                                                                                                                                                                                                                                                                                                                                                                                                                                                                                                                                                                                                                                                                                                                                                                                                                                                                                                                                                                                                                                                                                                                                                                                                                                                                                                                                                                                                                                                                                                                                                                                                                                                                                                                                                                                                                                                                                                                                                                                                                                                                                                                                                                                                                                                                                                                                                                                                                                                                                                                                                                                                                                                                                                                                                                                                                                                                                                                                                                                                                                                                                                                                                                                                                                                                                                                                                                                                                                                                                                                                                                                                                                                                                                                                                                                                                                                                                                                                                                                                                                                                                                                                                                                                                                                                                                                                                                                                                                                                                                                                                                                                                                                                                                                                                                                                                                                                                                                                                                                                                                                                                                                                                                                                                                                                                                                                                                                                                                                                                                                                                                                                                                                                                                                                                                                                                                                                                                                                                                                                                                                                                                                                                                                                                                                                                                                                                                                                                                                                                                                                                                                                                                                                                                                                                                                                        | LESP Zacatecas                                                                                       | Instituto de diagnóstico y Referencia Epidemiologicos (INDRE)<br>Departamento de Virologia | Abril Rodríguez-Maldonado; Ariadna Medina-Benitez; Claudia Wong-Arambula; Ernesto Ramirez-Gonzalez.; Gisela Barrera-Badillo; Irma Lopez-Martinez; Joaquin Quiroz-Mercado; Lucia Hernandez-Rivas; Natividad Cruz-Ortiz; Sergio Rangel-Guerrero; Tatiana Nunez-Garcia; Vanessa Rivero-Arredondo                                                                                                                                                                                                                                                                                                                                                                                                                                                                                          |                                                                                                                                                                                                                                                                                               |
| EPI_ISL_435573, EPI_ISL_578719, EPI_ISL_578947                                                                                                                                                                                                                                                                                                                                                                                                                                                                                                                                                                                                                                                                                                                                                                                                                                                                                                                                                                                                                                                                                                                                                                                                                                                                                                                                                                                                                                                                                                                                                                                                                                                                                                                                                                                                                                                                                                                                                                                                                                                                                                                                                                                                                                                                                                                                                                                                                                                                                                                                                                                                                                                                                                                                                                                                                                                                                                                                                                                                                                                                                                                                                                                                                                                                                                                                                                                                                                                                                                                                                                                                                                                                                                                                                                                                                                                                                                                                                                                                                                                                                                                                                                                                                                                                                                                                                                                                                                                                                                                                                                                                                                                                                                                                                                                                                                                                                                                                                                                                                                                                                                                                                                                                                                                                                                                                                                                                                                                                                                                                                                                                                                                                                                                                                                                                                                                                                                                                                                                                                                                                                                                                                                                                                                                                                                                                                                                                                                                                                                                                                                                                                                                                                                                                                                                                                                                                                                                                                                                                                                                                                                                                                                                                                                                                                                                                                                                                                                                                                                                                                                                                                                                                                                                                                                                                                                                                                                                                                                                                                                                                                                                                                                                                                                                                                                                                                                                                                                                                                                                                                                                                                                                                                                                                                                                                                                                                                                                                                                                                                                                                                                                                                                                                                                                                                                                                                                                                                                                                                                                                                                                                                                                                                                                                                                                                                                                                                                                                                                                                                                                                                                                                                                                                                                                                                                                                                                                                                                                                                                                                                                                                                                                                                                                                                                                                                                                                                                                                                                                                                                                                                                                                                                                                                                                                                                                                                                                                                                                                                                                                                                                                                                                                                                                                                         | LSUHS Emerging Viral Threat Laboratory                                                               | Microbial Genome Sequencing Center                                                         | Abida Siddiqui; Adam Greer; Andrew D. Yurochko; Byeong-Jae Lee; Camille F. Abshire; Chan-ki Min; Christopher G. Kevill; Daniel J. Snyder; Edna Ondari; Jason M. Bodily; Jeremy P. Kamit; John A. Vanchiere; Katarzyna Zwolinska; Maarten Van Diest; Malgorzata Bienkowska-Haba; Martin J. Sapp; Md Maksudul Alam; Monica Gestal-Carteile; Paul M. Weinberger; Rona S. Scott; Vaughn S. Cooper                                                                                                                                                                                                                                                                                                                                                                                          |                                                                                                                                                                                                                                                                                               |
| EPI_ISL_468743, EPI_ISL_468744                                                                                                                                                                                                                                                                                                                                                                                                                                                                                                                                                                                                                                                                                                                                                                                                                                                                                                                                                                                                                                                                                                                                                                                                                                                                                                                                                                                                                                                                                                                                                                                                                                                                                                                                                                                                                                                                                                                                                                                                                                                                                                                                                                                                                                                                                                                                                                                                                                                                                                                                                                                                                                                                                                                                                                                                                                                                                                                                                                                                                                                                                                                                                                                                                                                                                                                                                                                                                                                                                                                                                                                                                                                                                                                                                                                                                                                                                                                                                                                                                                                                                                                                                                                                                                                                                                                                                                                                                                                                                                                                                                                                                                                                                                                                                                                                                                                                                                                                                                                                                                                                                                                                                                                                                                                                                                                                                                                                                                                                                                                                                                                                                                                                                                                                                                                                                                                                                                                                                                                                                                                                                                                                                                                                                                                                                                                                                                                                                                                                                                                                                                                                                                                                                                                                                                                                                                                                                                                                                                                                                                                                                                                                                                                                                                                                                                                                                                                                                                                                                                                                                                                                                                                                                                                                                                                                                                                                                                                                                                                                                                                                                                                                                                                                                                                                                                                                                                                                                                                                                                                                                                                                                                                                                                                                                                                                                                                                                                                                                                                                                                                                                                                                                                                                                                                                                                                                                                                                                                                                                                                                                                                                                                                                                                                                                                                                                                                                                                                                                                                                                                                                                                                                                                                                                                                                                                                                                                                                                                                                                                                                                                                                                                                                                                                                                                                                                                                                                                                                                                                                                                                                                                                                                                                                                                                                                                                                                                                                                                                                                                                                                                                                                                                                                                                                                                         | Lab voor klinische biologie                                                                          | Onderzoeksgroep Virologie                                                                  | Bruno Verhasselt; Hans Nauwynck; Laurens Lambrechts; Linos Vandekerckhove; Marthe Pauwels; Nick Vereecke; Sebastiaan Theuns                                                                                                                                                                                                                                                                                                                                                                                                                                                                                                                                                                                                                                                            |                                                                                                                                                                                                                                                                                               |
| EPI_ISL_456210                                                                                                                                                                                                                                                                                                                                                                                                                                                                                                                                                                                                                                                                                                                                                                                                                                                                                                                                                                                                                                                                                                                                                                                                                                                                                                                                                                                                                                                                                                                                                                                                                                                                                                                                                                                                                                                                                                                                                                                                                                                                                                                                                                                                                                                                                                                                                                                                                                                                                                                                                                                                                                                                                                                                                                                                                                                                                                                                                                                                                                                                                                                                                                                                                                                                                                                                                                                                                                                                                                                                                                                                                                                                                                                                                                                                                                                                                                                                                                                                                                                                                                                                                                                                                                                                                                                                                                                                                                                                                                                                                                                                                                                                                                                                                                                                                                                                                                                                                                                                                                                                                                                                                                                                                                                                                                                                                                                                                                                                                                                                                                                                                                                                                                                                                                                                                                                                                                                                                                                                                                                                                                                                                                                                                                                                                                                                                                                                                                                                                                                                                                                                                                                                                                                                                                                                                                                                                                                                                                                                                                                                                                                                                                                                                                                                                                                                                                                                                                                                                                                                                                                                                                                                                                                                                                                                                                                                                                                                                                                                                                                                                                                                                                                                                                                                                                                                                                                                                                                                                                                                                                                                                                                                                                                                                                                                                                                                                                                                                                                                                                                                                                                                                                                                                                                                                                                                                                                                                                                                                                                                                                                                                                                                                                                                                                                                                                                                                                                                                                                                                                                                                                                                                                                                                                                                                                                                                                                                                                                                                                                                                                                                                                                                                                                                                                                                                                                                                                                                                                                                                                                                                                                                                                                                                                                                                                                                                                                                                                                                                                                                                                                                                                                                                                                                                                                         | LabPLUS                                                                                              | Institute of Environmental Science and Research (ESR)                                      | Anja Werno; Antje van der Linden; Arlo Upton; Chris Mansell; David Hammer; Dragana Drinkovic; Erasmus Smit; Gary McAuliffe; Hana Sofia Andersson; James Ussher; Jill Sherwood; Joep de Ligt; Josh Freeman; Julia Howard; Juliet Elvy; Lauren Jelly; Mary DeAlmeida; Matt Blakiston; Matt Storey; Matthew Rogers; Max Bloomfield; Michael Addidle; Michelle Balm; Sally Roberts; Sarah Jefferies; Sharmini Muttaiyah; Susan Morpeth; Susan Taylor; Timothy Blackmore; Vani Sathyendran; Veronica Playle; Virginia Hope; Xiaoyun Ren                                                                                                                                                                                                                                                     |                                                                                                                                                                                                                                                                                               |
| EPI_ISL_547977                                                                                                                                                                                                                                                                                                                                                                                                                                                                                                                                                                                                                                                                                                                                                                                                                                                                                                                                                                                                                                                                                                                                                                                                                                                                                                                                                                                                                                                                                                                                                                                                                                                                                                                                                                                                                                                                                                                                                                                                                                                                                                                                                                                                                                                                                                                                                                                                                                                                                                                                                                                                                                                                                                                                                                                                                                                                                                                                                                                                                                                                                                                                                                                                                                                                                                                                                                                                                                                                                                                                                                                                                                                                                                                                                                                                                                                                                                                                                                                                                                                                                                                                                                                                                                                                                                                                                                                                                                                                                                                                                                                                                                                                                                                                                                                                                                                                                                                                                                                                                                                                                                                                                                                                                                                                                                                                                                                                                                                                                                                                                                                                                                                                                                                                                                                                                                                                                                                                                                                                                                                                                                                                                                                                                                                                                                                                                                                                                                                                                                                                                                                                                                                                                                                                                                                                                                                                                                                                                                                                                                                                                                                                                                                                                                                                                                                                                                                                                                                                                                                                                                                                                                                                                                                                                                                                                                                                                                                                                                                                                                                                                                                                                                                                                                                                                                                                                                                                                                                                                                                                                                                                                                                                                                                                                                                                                                                                                                                                                                                                                                                                                                                                                                                                                                                                                                                                                                                                                                                                                                                                                                                                                                                                                                                                                                                                                                                                                                                                                                                                                                                                                                                                                                                                                                                                                                                                                                                                                                                                                                                                                                                                                                                                                                                                                                                                                                                                                                                                                                                                                                                                                                                                                                                                                                                                                                                                                                                                                                                                                                                                                                                                                                                                                                                                                                                         | LabTests                                                                                             | Institute of Environmental Science and Research (ESR)                                      | Anja Werno; Antje van der Linden; Arlo Upton; Chris Mansell; David Hammer; Dragana Drinkovic; Erasmus Smit; Gary McAuliffe; Hana Sofia Andersson; Hermes Perez; James Ussher; Jill Sherwood; Jing Wang; Joep de Ligt; Josh Freeman; Julia Howard; Juliet Elvy; Lauren Jelly; Mary DeAlmeida; Matt Blakiston; Matt Storey; Matthew Rogers; Max Bloomfield; Michael Addidle; Michelle Balm; Sally Roberts; Sarah Jefferies; Sharmini Muttaiyah; Susan Morpeth; Susan Taylor; Timothy Blackmore; Vani Sathyendran; Veronica Playle; Virginia Hope; Xiaoyun Ren                                                                                                                                                                                                                            |                                                                                                                                                                                                                                                                                               |
| EPI_ISL_560637                                                                                                                                                                                                                                                                                                                                                                                                                                                                                                                                                                                                                                                                                                                                                                                                                                                                                                                                                                                                                                                                                                                                                                                                                                                                                                                                                                                                                                                                                                                                                                                                                                                                                                                                                                                                                                                                                                                                                                                                                                                                                                                                                                                                                                                                                                                                                                                                                                                                                                                                                                                                                                                                                                                                                                                                                                                                                                                                                                                                                                                                                                                                                                                                                                                                                                                                                                                                                                                                                                                                                                                                                                                                                                                                                                                                                                                                                                                                                                                                                                                                                                                                                                                                                                                                                                                                                                                                                                                                                                                                                                                                                                                                                                                                                                                                                                                                                                                                                                                                                                                                                                                                                                                                                                                                                                                                                                                                                                                                                                                                                                                                                                                                                                                                                                                                                                                                                                                                                                                                                                                                                                                                                                                                                                                                                                                                                                                                                                                                                                                                                                                                                                                                                                                                                                                                                                                                                                                                                                                                                                                                                                                                                                                                                                                                                                                                                                                                                                                                                                                                                                                                                                                                                                                                                                                                                                                                                                                                                                                                                                                                                                                                                                                                                                                                                                                                                                                                                                                                                                                                                                                                                                                                                                                                                                                                                                                                                                                                                                                                                                                                                                                                                                                                                                                                                                                                                                                                                                                                                                                                                                                                                                                                                                                                                                                                                                                                                                                                                                                                                                                                                                                                                                                                                                                                                                                                                                                                                                                                                                                                                                                                                                                                                                                                                                                                                                                                                                                                                                                                                                                                                                                                                                                                                                                                                                                                                                                                                                                                                                                                                                                                                                                                                                                                                                                         | Labo Analyses Med                                                                                    | National Reference Center for Viruses of Respiratory Infections, Institut Pasteur, Paris   | Etienne Simon-Lorière; Fabiana Gamarbo; Maud Vanpeene; Sylvie Behillili; Sylvie van der Werf; Vincent Enouf                                                                                                                                                                                                                                                                                                                                                                                                                                                                                                                                                                                                                                                                            |                                                                                                                                                                                                                                                                                               |
| EPI_ISL_476705                                                                                                                                                                                                                                                                                                                                                                                                                                                                                                                                                                                                                                                                                                                                                                                                                                                                                                                                                                                                                                                                                                                                                                                                                                                                                                                                                                                                                                                                                                                                                                                                                                                                                                                                                                                                                                                                                                                                                                                                                                                                                                                                                                                                                                                                                                                                                                                                                                                                                                                                                                                                                                                                                                                                                                                                                                                                                                                                                                                                                                                                                                                                                                                                                                                                                                                                                                                                                                                                                                                                                                                                                                                                                                                                                                                                                                                                                                                                                                                                                                                                                                                                                                                                                                                                                                                                                                                                                                                                                                                                                                                                                                                                                                                                                                                                                                                                                                                                                                                                                                                                                                                                                                                                                                                                                                                                                                                                                                                                                                                                                                                                                                                                                                                                                                                                                                                                                                                                                                                                                                                                                                                                                                                                                                                                                                                                                                                                                                                                                                                                                                                                                                                                                                                                                                                                                                                                                                                                                                                                                                                                                                                                                                                                                                                                                                                                                                                                                                                                                                                                                                                                                                                                                                                                                                                                                                                                                                                                                                                                                                                                                                                                                                                                                                                                                                                                                                                                                                                                                                                                                                                                                                                                                                                                                                                                                                                                                                                                                                                                                                                                                                                                                                                                                                                                                                                                                                                                                                                                                                                                                                                                                                                                                                                                                                                                                                                                                                                                                                                                                                                                                                                                                                                                                                                                                                                                                                                                                                                                                                                                                                                                                                                                                                                                                                                                                                                                                                                                                                                                                                                                                                                                                                                                                                                                                                                                                                                                                                                                                                                                                                                                                                                                                                                                                                                         | Labor Kneißler GmbH & Co. KG                                                                         | Heinrich Pette Institute, Leibniz Institute for Experimental Virology                      | Adam Grundhoff; Manja Czech-Sioli; Matthias Ottinger; Melanie M. Brinkmann; Nicole Fischer; Thomas Günther                                                                                                                                                                                                                                                                                                                                                                                                                                                                                                                                                                                                                                                                             |                                                                                                                                                                                                                                                                                               |
| EPI_ISL_429718, EPI_ISL_434495                                                                                                                                                                                                                                                                                                                                                                                                                                                                                                                                                                                                                                                                                                                                                                                                                                                                                                                                                                                                                                                                                                                                                                                                                                                                                                                                                                                                                                                                                                                                                                                                                                                                                                                                                                                                                                                                                                                                                                                                                                                                                                                                                                                                                                                                                                                                                                                                                                                                                                                                                                                                                                                                                                                                                                                                                                                                                                                                                                                                                                                                                                                                                                                                                                                                                                                                                                                                                                                                                                                                                                                                                                                                                                                                                                                                                                                                                                                                                                                                                                                                                                                                                                                                                                                                                                                                                                                                                                                                                                                                                                                                                                                                                                                                                                                                                                                                                                                                                                                                                                                                                                                                                                                                                                                                                                                                                                                                                                                                                                                                                                                                                                                                                                                                                                                                                                                                                                                                                                                                                                                                                                                                                                                                                                                                                                                                                                                                                                                                                                                                                                                                                                                                                                                                                                                                                                                                                                                                                                                                                                                                                                                                                                                                                                                                                                                                                                                                                                                                                                                                                                                                                                                                                                                                                                                                                                                                                                                                                                                                                                                                                                                                                                                                                                                                                                                                                                                                                                                                                                                                                                                                                                                                                                                                                                                                                                                                                                                                                                                                                                                                                                                                                                                                                                                                                                                                                                                                                                                                                                                                                                                                                                                                                                                                                                                                                                                                                                                                                                                                                                                                                                                                                                                                                                                                                                                                                                                                                                                                                                                                                                                                                                                                                                                                                                                                                                                                                                                                                                                                                                                                                                                                                                                                                                                                                                                                                                                                                                                                                                                                                                                                                                                                                                                                                                         | Laboratoire National de Sante, Microbiology, Virology                                                | Laboratoire National de Sante, Microbiology, Epidemiology and Microbial Genomics           | Anke Wienecke-Baldacchino; Ardashes Latsuzbaia; Catherine Ragimbeau; Guillaume Fournier; Jessica Tapp; Joel Mossong; Tamir Abdelrahman; Trung Nguyen Nguyen                                                                                                                                                                                                                                                                                                                                                                                                                                                                                                                                                                                                                            |                                                                                                                                                                                                                                                                                               |
| EPI_ISL_419564                                                                                                                                                                                                                                                                                                                                                                                                                                                                                                                                                                                                                                                                                                                                                                                                                                                                                                                                                                                                                                                                                                                                                                                                                                                                                                                                                                                                                                                                                                                                                                                                                                                                                                                                                                                                                                                                                                                                                                                                                                                                                                                                                                                                                                                                                                                                                                                                                                                                                                                                                                                                                                                                                                                                                                                                                                                                                                                                                                                                                                                                                                                                                                                                                                                                                                                                                                                                                                                                                                                                                                                                                                                                                                                                                                                                                                                                                                                                                                                                                                                                                                                                                                                                                                                                                                                                                                                                                                                                                                                                                                                                                                                                                                                                                                                                                                                                                                                                                                                                                                                                                                                                                                                                                                                                                                                                                                                                                                                                                                                                                                                                                                                                                                                                                                                                                                                                                                                                                                                                                                                                                                                                                                                                                                                                                                                                                                                                                                                                                                                                                                                                                                                                                                                                                                                                                                                                                                                                                                                                                                                                                                                                                                                                                                                                                                                                                                                                                                                                                                                                                                                                                                                                                                                                                                                                                                                                                                                                                                                                                                                                                                                                                                                                                                                                                                                                                                                                                                                                                                                                                                                                                                                                                                                                                                                                                                                                                                                                                                                                                                                                                                                                                                                                                                                                                                                                                                                                                                                                                                                                                                                                                                                                                                                                                                                                                                                                                                                                                                                                                                                                                                                                                                                                                                                                                                                                                                                                                                                                                                                                                                                                                                                                                                                                                                                                                                                                                                                                                                                                                                                                                                                                                                                                                                                                                                                                                                                                                                                                                                                                                                                                                                                                                                                                                                                         | Laboratoire National de Santé, Microbiology, Virology                                                | Laboratoire National de Santé, Microbiology, Epidemiology and Microbial Genomics           | Anke Wienecke-Baldacchino; Ardashes Latsuzbaia; Catherine Ragimbeau; Guillaume Fournier; Jessica Tapp; Joel Mossong; Tamir Abdelrahman; Trung Nguyen Nguyen                                                                                                                                                                                                                                                                                                                                                                                                                                                                                                                                                                                                                            |                                                                                                                                                                                                                                                                                               |
| EPI_ISL_660474                                                                                                                                                                                                                                                                                                                                                                                                                                                                                                                                                                                                                                                                                                                                                                                                                                                                                                                                                                                                                                                                                                                                                                                                                                                                                                                                                                                                                                                                                                                                                                                                                                                                                                                                                                                                                                                                                                                                                                                                                                                                                                                                                                                                                                                                                                                                                                                                                                                                                                                                                                                                                                                                                                                                                                                                                                                                                                                                                                                                                                                                                                                                                                                                                                                                                                                                                                                                                                                                                                                                                                                                                                                                                                                                                                                                                                                                                                                                                                                                                                                                                                                                                                                                                                                                                                                                                                                                                                                                                                                                                                                                                                                                                                                                                                                                                                                                                                                                                                                                                                                                                                                                                                                                                                                                                                                                                                                                                                                                                                                                                                                                                                                                                                                                                                                                                                                                                                                                                                                                                                                                                                                                                                                                                                                                                                                                                                                                                                                                                                                                                                                                                                                                                                                                                                                                                                                                                                                                                                                                                                                                                                                                                                                                                                                                                                                                                                                                                                                                                                                                                                                                                                                                                                                                                                                                                                                                                                                                                                                                                                                                                                                                                                                                                                                                                                                                                                                                                                                                                                                                                                                                                                                                                                                                                                                                                                                                                                                                                                                                                                                                                                                                                                                                                                                                                                                                                                                                                                                                                                                                                                                                                                                                                                                                                                                                                                                                                                                                                                                                                                                                                                                                                                                                                                                                                                                                                                                                                                                                                                                                                                                                                                                                                                                                                                                                                                                                                                                                                                                                                                                                                                                                                                                                                                                                                                                                                                                                                                                                                                                                                                                                                                                                                                                                                                                         | Laboratoire de Microbiologie CHU Sourou Sanou                                                        | Centre Muraz                                                                               | Abdoul-Salam Ouedraogo; Arsène Zongo; Essia Belarbi; Fabian Leendertz; Grit Schubert; Halidou Tinto; Lassana Sangaré; Soumeiya Ouangraoua; Yacouba Sawadogo; Zekiba Tamagda                                                                                                                                                                                                                                                                                                                                                                                                                                                                                                                                                                                                            |                                                                                                                                                                                                                                                                                               |
| EPI_ISL_414623                                                                                                                                                                                                                                                                                                                                                                                                                                                                                                                                                                                                                                                                                                                                                                                                                                                                                                                                                                                                                                                                                                                                                                                                                                                                                                                                                                                                                                                                                                                                                                                                                                                                                                                                                                                                                                                                                                                                                                                                                                                                                                                                                                                                                                                                                                                                                                                                                                                                                                                                                                                                                                                                                                                                                                                                                                                                                                                                                                                                                                                                                                                                                                                                                                                                                                                                                                                                                                                                                                                                                                                                                                                                                                                                                                                                                                                                                                                                                                                                                                                                                                                                                                                                                                                                                                                                                                                                                                                                                                                                                                                                                                                                                                                                                                                                                                                                                                                                                                                                                                                                                                                                                                                                                                                                                                                                                                                                                                                                                                                                                                                                                                                                                                                                                                                                                                                                                                                                                                                                                                                                                                                                                                                                                                                                                                                                                                                                                                                                                                                                                                                                                                                                                                                                                                                                                                                                                                                                                                                                                                                                                                                                                                                                                                                                                                                                                                                                                                                                                                                                                                                                                                                                                                                                                                                                                                                                                                                                                                                                                                                                                                                                                                                                                                                                                                                                                                                                                                                                                                                                                                                                                                                                                                                                                                                                                                                                                                                                                                                                                                                                                                                                                                                                                                                                                                                                                                                                                                                                                                                                                                                                                                                                                                                                                                                                                                                                                                                                                                                                                                                                                                                                                                                                                                                                                                                                                                                                                                                                                                                                                                                                                                                                                                                                                                                                                                                                                                                                                                                                                                                                                                                                                                                                                                                                                                                                                                                                                                                                                                                                                                                                                                                                                                                                                                                         | Laboratoire de Virologie Institut de Virologie - INSERM U 1109 Hôpitaux Universitaires de Strasbourg | National Reference Center for Viruses of Respiratory Infections, Institut Pasteur, Paris   | Angela Brisebarre; Flora Donati Vincent Enouf; Marion Barbet; Maud Vanpeene; Méline Bizard; Méline Albert; Samira Fafi-Kremer; Sylvie Behillili; Sylvie van der Werf                                                                                                                                                                                                                                                                                                                                                                                                                                                                                                                                                                                                                   |                                                                                                                                                                                                                                                                                               |
| EPI_ISL_463942                                                                                                                                                                                                                                                                                                                                                                                                                                                                                                                                                                                                                                                                                                                                                                                                                                                                                                                                                                                                                                                                                                                                                                                                                                                                                                                                                                                                                                                                                                                                                                                                                                                                                                                                                                                                                                                                                                                                                                                                                                                                                                                                                                                                                                                                                                                                                                                                                                                                                                                                                                                                                                                                                                                                                                                                                                                                                                                                                                                                                                                                                                                                                                                                                                                                                                                                                                                                                                                                                                                                                                                                                                                                                                                                                                                                                                                                                                                                                                                                                                                                                                                                                                                                                                                                                                                                                                                                                                                                                                                                                                                                                                                                                                                                                                                                                                                                                                                                                                                                                                                                                                                                                                                                                                                                                                                                                                                                                                                                                                                                                                                                                                                                                                                                                                                                                                                                                                                                                                                                                                                                                                                                                                                                                                                                                                                                                                                                                                                                                                                                                                                                                                                                                                                                                                                                                                                                                                                                                                                                                                                                                                                                                                                                                                                                                                                                                                                                                                                                                                                                                                                                                                                                                                                                                                                                                                                                                                                                                                                                                                                                                                                                                                                                                                                                                                                                                                                                                                                                                                                                                                                                                                                                                                                                                                                                                                                                                                                                                                                                                                                                                                                                                                                                                                                                                                                                                                                                                                                                                                                                                                                                                                                                                                                                                                                                                                                                                                                                                                                                                                                                                                                                                                                                                                                                                                                                                                                                                                                                                                                                                                                                                                                                                                                                                                                                                                                                                                                                                                                                                                                                                                                                                                                                                                                                                                                                                                                                                                                                                                                                                                                                                                                                                                                                                                                         | Laboratoire de microbiologie, Hopital de Verdun                                                      | Smith Laboratory, Centre de Recherche CHU Sainte-Justine                                   | Ivan Pavlov; Marieke Rozendaal; Martin Smith                                                                                                                                                                                                                                                                                                                                                                                                                                                                                                                                                                                                                                                                                                                                           |                                                                                                                                                                                                                                                                                               |
| EPI_ISL_1340620, EPI_ISL_1340621, EPI_ISL_1340623, EPI_ISL_1359063                                                                                                                                                                                                                                                                                                                                                                                                                                                                                                                                                                                                                                                                                                                                                                                                                                                                                                                                                                                                                                                                                                                                                                                                                                                                                                                                                                                                                                                                                                                                                                                                                                                                                                                                                                                                                                                                                                                                                                                                                                                                                                                                                                                                                                                                                                                                                                                                                                                                                                                                                                                                                                                                                                                                                                                                                                                                                                                                                                                                                                                                                                                                                                                                                                                                                                                                                                                                                                                                                                                                                                                                                                                                                                                                                                                                                                                                                                                                                                                                                                                                                                                                                                                                                                                                                                                                                                                                                                                                                                                                                                                                                                                                                                                                                                                                                                                                                                                                                                                                                                                                                                                                                                                                                                                                                                                                                                                                                                                                                                                                                                                                                                                                                                                                                                                                                                                                                                                                                                                                                                                                                                                                                                                                                                                                                                                                                                                                                                                                                                                                                                                                                                                                                                                                                                                                                                                                                                                                                                                                                                                                                                                                                                                                                                                                                                                                                                                                                                                                                                                                                                                                                                                                                                                                                                                                                                                                                                                                                                                                                                                                                                                                                                                                                                                                                                                                                                                                                                                                                                                                                                                                                                                                                                                                                                                                                                                                                                                                                                                                                                                                                                                                                                                                                                                                                                                                                                                                                                                                                                                                                                                                                                                                                                                                                                                                                                                                                                                                                                                                                                                                                                                                                                                                                                                                                                                                                                                                                                                                                                                                                                                                                                                                                                                                                                                                                                                                                                                                                                                                                                                                                                                                                                                                                                                                                                                                                                                                                                                                                                                                                                                                                                                                                                                                     | Laboratorio BIOMEDICA                                                                                | Instituto de Diagnostico y Referencia Epidemiologicos (INDRE)                              | Abril Rodriguez-Maldonado; Ariadna Medina-Benitez; Claudia Wong-Arambula; Ernesto Ramirez-Gonzalez.; Gisela Barrera-Badillo; Irma Lopez-Martinez; Joaquin Quiroz-Mercado; Lucia Hernandez-Rivas; Natividad Cruz-Ortiz; Sergio Rangel-Guerrero; Tatiana Nunez-Garcia; Vanessa Rivero-Arredondo                                                                                                                                                                                                                                                                                                                                                                                                                                                                                          |                                                                                                                                                                                                                                                                                               |
| EPI_ISL_424667                                                                                                                                                                                                                                                                                                                                                                                                                                                                                                                                                                                                                                                                                                                                                                                                                                                                                                                                                                                                                                                                                                                                                                                                                                                                                                                                                                                                                                                                                                                                                                                                                                                                                                                                                                                                                                                                                                                                                                                                                                                                                                                                                                                                                                                                                                                                                                                                                                                                                                                                                                                                                                                                                                                                                                                                                                                                                                                                                                                                                                                                                                                                                                                                                                                                                                                                                                                                                                                                                                                                                                                                                                                                                                                                                                                                                                                                                                                                                                                                                                                                                                                                                                                                                                                                                                                                                                                                                                                                                                                                                                                                                                                                                                                                                                                                                                                                                                                                                                                                                                                                                                                                                                                                                                                                                                                                                                                                                                                                                                                                                                                                                                                                                                                                                                                                                                                                                                                                                                                                                                                                                                                                                                                                                                                                                                                                                                                                                                                                                                                                                                                                                                                                                                                                                                                                                                                                                                                                                                                                                                                                                                                                                                                                                                                                                                                                                                                                                                                                                                                                                                                                                                                                                                                                                                                                                                                                                                                                                                                                                                                                                                                                                                                                                                                                                                                                                                                                                                                                                                                                                                                                                                                                                                                                                                                                                                                                                                                                                                                                                                                                                                                                                                                                                                                                                                                                                                                                                                                                                                                                                                                                                                                                                                                                                                                                                                                                                                                                                                                                                                                                                                                                                                                                                                                                                                                                                                                                                                                                                                                                                                                                                                                                                                                                                                                                                                                                                                                                                                                                                                                                                                                                                                                                                                                                                                                                                                                                                                                                                                                                                                                                                                                                                                                                                                                         | Laboratorio Estatal de Salud Publica del Estado de México                                            | Instituto de Diagnóstico y Referencia Epidemiológicos                                      | Adnan Araiza Rodríguez; Alejandro Sánchez; Alfredo Ponce de León Garduño; Blanca Taboada; Carlos F. Arias.; Carolina González Torres; Celia Boukadida; Cesar Raúl González Bonilla; Concepción Grajales Muñoz; Edgar Mendieta Condado; Eduardo Becerril Vargas; Fabiola Garcés Ayala; Fernando Ledesma Barrientos; Francisco Javier Gaytán Cervantes; Francisco Pulido; Gisela Barrera Badillo; Gloria Vázquez; Guillermo M. Ruiz-Palacios; Irma López Martínez; Joel Armando Vázquez Pérez; José Arturo Martínez Orozco; José Ernesto Ramírez González; José Esteban Muñoz Medina; Lucia Hernández Rivas; Luis Alberto García Andrade; Mario Mujica Sánchez; Pavel Isa; Pilar Ramos Cervantes; Ricardo Grande; Santiago Avila Rios; Victor Hugo Borja Aburto; Violeta Ibarra Gonzalez |                                                                                                                                                                                                                                                                                               |
| EPI_ISL_424672                                                                                                                                                                                                                                                                                                                                                                                                                                                                                                                                                                                                                                                                                                                                                                                                                                                                                                                                                                                                                                                                                                                                                                                                                                                                                                                                                                                                                                                                                                                                                                                                                                                                                                                                                                                                                                                                                                                                                                                                                                                                                                                                                                                                                                                                                                                                                                                                                                                                                                                                                                                                                                                                                                                                                                                                                                                                                                                                                                                                                                                                                                                                                                                                                                                                                                                                                                                                                                                                                                                                                                                                                                                                                                                                                                                                                                                                                                                                                                                                                                                                                                                                                                                                                                                                                                                                                                                                                                                                                                                                                                                                                                                                                                                                                                                                                                                                                                                                                                                                                                                                                                                                                                                                                                                                                                                                                                                                                                                                                                                                                                                                                                                                                                                                                                                                                                                                                                                                                                                                                                                                                                                                                                                                                                                                                                                                                                                                                                                                                                                                                                                                                                                                                                                                                                                                                                                                                                                                                                                                                                                                                                                                                                                                                                                                                                                                                                                                                                                                                                                                                                                                                                                                                                                                                                                                                                                                                                                                                                                                                                                                                                                                                                                                                                                                                                                                                                                                                                                                                                                                                                                                                                                                                                                                                                                                                                                                                                                                                                                                                                                                                                                                                                                                                                                                                                                                                                                                                                                                                                                                                                                                                                                                                                                                                                                                                                                                                                                                                                                                                                                                                                                                                                                                                                                                                                                                                                                                                                                                                                                                                                                                                                                                                                                                                                                                                                                                                                                                                                                                                                                                                                                                                                                                                                                                                                                                                                                                                                                                                                                                                                                                                                                                                                                                                                                         | Laboratorio Estatal de Salud Publica del Estado de Puebla                                            | Instituto de Diagnostico y Referencia Epidemiologicos                                      | Adnan Araiza Rodríguez; Alejandro Sánchez; Alfredo Ponce de León Garduño; Blanca Taboada; Carlos F. Arias; Carolina González Torres; Celia Boukadida; Cesar Raúl González Bonilla; Concepción Grajales Muñoz; Edgar Mendieta Condado; Eduardo Becerril Vargas; Fabiola Garcés Ayala; Fernando Ledesma Barrientos; Francisco Javier Gaytán Cervantes; Francisco Pulido; Gisela Barrera Badillo; Gloria Vázquez; Guillermo M. Ruiz-Palacios; Irma López Martínez; Joel Armando Vázquez Pérez; José Arturo Martínez Orozco; José Ernesto Ramírez González; José Esteban Muñoz Medina; Lucia Hernández Rivas; Luis Alberto García Andrade; Mario Mujica Sánchez; Pavel Isa; Pilar Ramos Cervantes; Ricardo Grande; Santiago Avila Rios; Victor Hugo Borja Aburto; Violeta Ibarra Gonzalez  |                                                                                                                                                                                                                                                                                               |
| EPI_ISL_424670                                                                                                                                                                                                                                                                                                                                                                                                                                                                                                                                                                                                                                                                                                                                                                                                                                                                                                                                                                                                                                                                                                                                                                                                                                                                                                                                                                                                                                                                                                                                                                                                                                                                                                                                                                                                                                                                                                                                                                                                                                                                                                                                                                                                                                                                                                                                                                                                                                                                                                                                                                                                                                                                                                                                                                                                                                                                                                                                                                                                                                                                                                                                                                                                                                                                                                                                                                                                                                                                                                                                                                                                                                                                                                                                                                                                                                                                                                                                                                                                                                                                                                                                                                                                                                                                                                                                                                                                                                                                                                                                                                                                                                                                                                                                                                                                                                                                                                                                                                                                                                                                                                                                                                                                                                                                                                                                                                                                                                                                                                                                                                                                                                                                                                                                                                                                                                                                                                                                                                                                                                                                                                                                                                                                                                                                                                                                                                                                                                                                                                                                                                                                                                                                                                                                                                                                                                                                                                                                                                                                                                                                                                                                                                                                                                                                                                                                                                                                                                                                                                                                                                                                                                                                                                                                                                                                                                                                                                                                                                                                                                                                                                                                                                                                                                                                                                                                                                                                                                                                                                                                                                                                                                                                                                                                                                                                                                                                                                                                                                                                                                                                                                                                                                                                                                                                                                                                                                                                                                                                                                                                                                                                                                                                                                                                                                                                                                                                                                                                                                                                                                                                                                                                                                                                                                                                                                                                                                                                                                                                                                                                                                                                                                                                                                                                                                                                                                                                                                                                                                                                                                                                                                                                                                                                                                                                                                                                                                                                                                                                                                                                                                                                                                                                                                                                                                                         | Laboratorio Estatal de Salud Publica del Estado de Queretaro                                         | Instituto de Diagnóstico y Referencia Epidemiologicos                                      | Adnan Araiza Rodríguez; Alejandro Sánchez; Alfredo Ponce de León Garduño; Blanca Taboada; Carlos F. Arias; Carolina González Torres; Celia Boukadida; Cesar Raúl González Bonilla; Concepción Grajales Muñoz; Edgar Mendieta Condado; Eduardo Becerril Vargas; Fabiola Garcés Ayala; Fernando Ledesma Barrientos; Francisco Javier Gaytán Cervantes; Francisco Pulido; Gisela Barrera Badillo; Gloria Vázquez; Guillermo M. Ruiz-Palacios; Irma López Martínez; Joel Armando Vázquez Pérez; José Arturo Martínez Orozco; José Ernesto Ramírez González; José Esteban Muñoz Medina; Lucia Hernández Rivas; Luis Alberto García Andrade; Mario Mujica Sánchez; Pavel Isa; Pilar Ramos Cervantes; Ricardo Grande; Santiago Avila Rios; Victor Hugo Borja Aburto; Violeta Ibarra Gonzalez  |                                                                                                                                                                                                                                                                                               |
| EPI_ISL_779185, EPI_ISL_779186, EPI_ISL_779187, EPI_ISL_779188, EPI_ISL_779189, EPI_ISL_779190, EPI_ISL_779191, EPI_ISL_779192, EPI_ISL_779193, EPI_ISL_779194, EPI_ISL_779195, EPI_ISL_779196, EPI_ISL_779197, EPI_ISL_779198, EPI_ISL_779199, EPI_ISL_779200, EPI_ISL_779201, EPI_ISL_779202, EPI_ISL_779203, EPI_ISL_779204, EPI_ISL_779205, EPI_ISL_779206, EPI_ISL_779207, EPI_ISL_779208, EPI_ISL_779209, EPI_ISL_779210, EPI_ISL_779211, EPI_ISL_779212, EPI_ISL_779213, EPI_ISL_779214, EPI_ISL_779215, EPI_ISL_779216, EPI_ISL_779217, EPI_ISL_779218, EPI_ISL_779219, EPI_ISL_779220, EPI_ISL_779221, EPI_ISL_779222, EPI_ISL_779223, EPI_ISL_779224, EPI_ISL_779225, EPI_ISL_779226, EPI_ISL_779227, EPI_ISL_779228, EPI_ISL_779229, EPI_ISL_779230, EPI_ISL_779231, EPI_ISL_779232, EPI_ISL_779233, EPI_ISL_779234, EPI_ISL_779235, EPI_ISL_779236, EPI_ISL_779237, EPI_ISL_779238, EPI_ISL_779239, EPI_ISL_779240, EPI_ISL_779241, EPI_ISL_779242, EPI_ISL_779243, EPI_ISL_779244, EPI_ISL_779245, EPI_ISL_779246, EPI_ISL_779247, EPI_ISL_779248, EPI_ISL_779249, EPI_ISL_779250, EPI_ISL_779251, EPI_ISL_779252, EPI_ISL_779253, EPI_ISL_779254, EPI_ISL_779255, EPI_ISL_779256, EPI_ISL_779257, EPI_ISL_779258, EPI_ISL_779259, EPI_ISL_779260, EPI_ISL_779261, EPI_ISL_779262, EPI_ISL_779263, EPI_ISL_779264, EPI_ISL_779265, EPI_ISL_779266, EPI_ISL_779267, EPI_ISL_779268, EPI_ISL_779269, EPI_ISL_779270, EPI_ISL_779271, EPI_ISL_779272, EPI_ISL_779273, EPI_ISL_779274, EPI_ISL_779275, EPI_ISL_779276, EPI_ISL_779277, EPI_ISL_779278, EPI_ISL_779279, EPI_ISL_779280, EPI_ISL_779281, EPI_ISL_779282, EPI_ISL_779283, EPI_ISL_779284, EPI_ISL_779285, EPI_ISL_779286, EPI_ISL_779287, EPI_ISL_779288, EPI_ISL_779289, EPI_ISL_779290, EPI_ISL_779291, EPI_ISL_779292, EPI_ISL_779293, EPI_ISL_779294, EPI_ISL_779295, EPI_ISL_779296, EPI_ISL_779297, EPI_ISL_779298, EPI_ISL_779299, EPI_ISL_779300, EPI_ISL_779301, EPI_ISL_779302, EPI_ISL_779303, EPI_ISL_779304, EPI_ISL_779305, EPI_ISL_779306, EPI_ISL_779307, EPI_ISL_779308, EPI_ISL_779309, EPI_ISL_779310, EPI_ISL_779311, EPI_ISL_779312, EPI_ISL_779313, EPI_ISL_779314, EPI_ISL_779315, EPI_ISL_779316, EPI_ISL_779317, EPI_ISL_779318, EPI_ISL_779319, EPI_ISL_779320, EPI_ISL_779321, EPI_ISL_779322, EPI_ISL_779323, EPI_ISL_779324, EPI_ISL_779325, EPI_ISL_779326, EPI_ISL_779327, EPI_ISL_779328, EPI_ISL_779329, EPI_ISL_779330, EPI_ISL_779331, EPI_ISL_779332, EPI_ISL_779333, EPI_ISL_779334, EPI_ISL_779335, EPI_ISL_779336, EPI_ISL_779337, EPI_ISL_779338, EPI_ISL_779339, EPI_ISL_779340, EPI_ISL_779341, EPI_ISL_779342, EPI_ISL_779343, EPI_ISL_779344, EPI_ISL_779345, EPI_ISL_779346, EPI_ISL_779347, EPI_ISL_779348, EPI_ISL_779349, EPI_ISL_779350, EPI_ISL_779351, EPI_ISL_779352, EPI_ISL_779353, EPI_ISL_779354, EPI_ISL_779355, EPI_ISL_779356, EPI_ISL_779357, EPI_ISL_779358, EPI_ISL_779359, EPI_ISL_779360, EPI_ISL_779361, EPI_ISL_779362, EPI_ISL_779363, EPI_ISL_779364, EPI_ISL_779365, EPI_ISL_779366, EPI_ISL_779367, EPI_ISL_779368, EPI_ISL_779369, EPI_ISL_779370, EPI_ISL_779371, EPI_ISL_779372, EPI_ISL_779373, EPI_ISL_779374, EPI_ISL_779375, EPI_ISL_779376, EPI_ISL_779377, EPI_ISL_779378, EPI_ISL_779379, EPI_ISL_779380, EPI_ISL_779381, EPI_ISL_779382, EPI_ISL_779383, EPI_ISL_779384, EPI_ISL_779385, EPI_ISL_779386, EPI_ISL_779387, EPI_ISL_779388, EPI_ISL_779389, EPI_ISL_779390, EPI_ISL_779391, EPI_ISL_779392, EPI_ISL_779393, EPI_ISL_779394, EPI_ISL_779395, EPI_ISL_779396, EPI_ISL_779397, EPI_ISL_779398, EPI_ISL_779399, EPI_ISL_779400, EPI_ISL_779401, EPI_ISL_779402, EPI_ISL_779403, EPI_ISL_779404, EPI_ISL_779405, EPI_ISL_779406, EPI_ISL_779407, EPI_ISL_779408, EPI_ISL_779409, EPI_ISL_779410, EPI_ISL_779411, EPI_ISL_779412, EPI_ISL_779413, EPI_ISL_779414, EPI_ISL_779415, EPI_ISL_779416, EPI_ISL_779417, EPI_ISL_779418, EPI_ISL_779419, EPI_ISL_779420, EPI_ISL_779421, EPI_ISL_779422, EPI_ISL_779423, EPI_ISL_779424, EPI_ISL_779425, EPI_ISL_779426, EPI_ISL_779427, EPI_ISL_779428, EPI_ISL_779429, EPI_ISL_779430, EPI_ISL_779431, EPI_ISL_779432, EPI_ISL_779433, EPI_ISL_779434, EPI_ISL_779435, EPI_ISL_779436, EPI_ISL_779437, EPI_ISL_779438, EPI_ISL_779439, EPI_ISL_779440, EPI_ISL_779441, EPI_ISL_779442, EPI_ISL_779443, EPI_ISL_779444, EPI_ISL_779445, EPI_ISL_779446, EPI_ISL_779447, EPI_ISL_779448, EPI_ISL_779449, EPI_ISL_779450, EPI_ISL_779451, EPI_ISL_779452, EPI_ISL_779453, EPI_ISL_779454, EPI_ISL_779455, EPI_ISL_779456, EPI_ISL_779457, EPI_ISL_779458, EPI_ISL_779459, EPI_ISL_779460, EPI_ISL_779461, EPI_ISL_779462, EPI_ISL_779463, EPI_ISL_779464, EPI_ISL_779465, EPI_ISL_779466, EPI_ISL_779467, EPI_ISL_779468, EPI_ISL_779469, EPI_ISL_779470, EPI_ISL_779471, EPI_ISL_779472, EPI_ISL_779473, EPI_ISL_779474, EPI_ISL_779475, EPI_ISL_779476, EPI_ISL_779477, EPI_ISL_779478, EPI_ISL_779479, EPI_ISL_779480, EPI_ISL_779481, EPI_ISL_779482, EPI_ISL_779483, EPI_ISL_779484, EPI_ISL_779485, EPI_ISL_779486, EPI_ISL_779487, EPI_ISL_779488, EPI_ISL_779489, EPI_ISL_779490, EPI_ISL_779491, EPI_ISL_779492, EPI_ISL_779493, EPI_ISL_779494, EPI_ISL_779495, EPI_ISL_779496, EPI_ISL_779497, EPI_ISL_779498, EPI_ISL_779499, EPI_ISL_779500, EPI_ISL_779501, EPI_ISL_779502, EPI_ISL_779503, EPI_ISL_779504, EPI_ISL_779505, EPI_ISL_779506, EPI_ISL_779507, EPI_ISL_779508, EPI_ISL_779509, EPI_ISL_779510, EPI_ISL_779511, EPI_ISL_779512, EPI_ISL_779513, EPI_ISL_779514, EPI_ISL_779515, EPI_ISL_779516, EPI_ISL_779517, EPI_ISL_779518, EPI_ISL_779519, EPI_ISL_779520, EPI_ISL_779521, EPI_ISL_779522, EPI_ISL_779523, EPI_ISL_779524, EPI_ISL_779525, EPI_ISL_779526, EPI_ISL_779527, EPI_ISL_779528, EPI_ISL_779529, EPI_ISL_779530, EPI_ISL_779531, EPI_ISL_779532, EPI_ISL_779533, EPI_ISL_779534, EPI_ISL_779535, EPI_ISL_779536, EPI_ISL_779537, EPI_ISL_779538, EPI_ISL_779539, EPI_ISL_779540, EPI_ISL_779541, EPI_ISL_779542, EPI_ISL_779543, EPI_ISL_779544, EPI_ISL_779545, EPI_ISL_779546, EPI_ISL_779547, EPI_ISL_779548, EPI_ISL_779549, EPI_ISL_779550, EPI_ISL_779551, EPI_ISL_779552, EPI_ISL_779553, EPI_ISL_779554, EPI_ISL_779555, EPI_ISL_779556, EPI_ISL_779557, EPI_ISL_779558, EPI_ISL_779559, EPI_ISL_779560, EPI_ISL_779561, EPI_ISL_779562, EPI_ISL_779563, EPI_ISL_779564, EPI_ISL_779565, EPI_ISL_779566, EPI_ISL_779567, EPI_ISL_779568, EPI_ISL_779569, EPI_ISL_779570, EPI_ISL_779571, EPI_ISL_779572, EPI_ISL_779573, EPI_ISL_779574, EPI_ISL_779575, EPI_ISL_779576, EPI_ISL_779577, EPI_ISL_779578, EPI_ISL_779579, EPI_ISL_779580, EPI_ISL_779581, EPI_ISL_779582, EPI_ISL_779583, EPI_ISL_779584, EPI_ISL_779585, EPI_ISL_779586, EPI_ISL_779587, EPI_ISL_779588, EPI_ISL_779589, EPI_ISL_779590, EPI_ISL_779591, EPI_ISL_779592, EPI_ISL_779593, EPI_ISL_779594, EPI_ISL_779595, EPI_ISL_779596, EPI_ISL_779597, EPI_ISL_779598, EPI_ISL_779599, EPI_ISL_779600, EPI_ISL_779601, EPI_ISL_779602, EPI_ISL_779603, EPI_ISL_779604, EPI_ISL_779605, EPI_ISL_779606, EPI_ISL_779607, EPI_ISL_779608, EPI_ISL_779609, EPI_ISL_779610, EPI_ISL_779611, EPI_ISL_779612, EPI_ISL_779613, EPI_ISL_779614, EPI_ISL_779615, EPI_ISL_779616, EPI_ISL_779617, EPI_ISL_779618, EPI_ISL_779619, EPI_ISL_779620, EPI_ISL_779621, EPI_ISL_779622, EPI_ISL_779623, EPI_ISL_779624, EPI_ISL_779625, EPI_ISL_779626, EPI_ISL_779627, EPI_ISL_779628, EPI_ISL_779629, EPI_ISL_779630, EPI_ISL_779631, EPI_ISL_779632, EPI_ISL_779633, EPI_ISL_779634, EPI_ISL_779635, EPI_ISL_779636, EPI_ISL_779637, EPI_ISL_779638, EPI_ISL_779639, EPI_ISL_779640, EPI_ISL_779641, EPI_ISL_779642, EPI_ISL_779643, EPI_ISL_779644, EPI_ISL_779645, EPI_ISL_779646, EPI_ISL_779647, EPI_ISL_779648, EPI_ISL_779649, EPI_ISL_779650, EPI_ISL_779651, EPI_ISL_779652, EPI_ISL_779653, EPI_ISL_779654, EPI_ISL_779655, EPI_ISL_779656, EPI_ISL_779657, EPI_ISL_779658, EPI_ISL_779659, EPI_ISL_779660, EPI_ISL_779661, EPI_ISL_779662, EPI_ISL_779663, EPI_ISL_779664, EPI_ISL_779665, EPI_ISL_779666, EPI_ISL_779667, EPI_ISL_779668, EPI_ISL_779669, EPI_ISL_779670, EPI_ISL_779671, EPI_ISL_779672, EPI_ISL_779673, EPI_ISL_779674, EPI_ISL_779675, EPI_ISL_779676, EPI_ISL_779677, EPI_ISL_779678, EPI_ISL_779679, EPI_ISL_779680, EPI_ISL_779681, EPI_ISL_779682, EPI_ISL_779683, EPI_ISL_779684, EPI_ISL_779685, EPI_ISL_779686, EPI_ISL_779687, EPI_ISL_779688, EPI_ISL_779689, EPI_ISL_779690, EPI_ISL_779691, EPI_ISL_779692, EPI_ISL_779693, EPI_ISL_779694, EPI_ISL_779695, EPI_ISL_779696, EPI_ISL_779697, EPI_ISL_779698, EPI_ISL_779699, EPI_ISL_779700, EPI_ISL_779701, EPI_ISL_779702, EPI_ISL_779703, EPI_ISL_779704, EPI_ISL_779705, EPI_ISL_779706, EPI_ISL_779707, EPI_ISL_779708, EPI_ISL_779709, EPI_ISL_779710, EPI_ISL_779711, EPI_ISL_779712, EPI_ISL_779713, EPI_ISL_779714, EPI_ISL_779715, EPI_ISL_779716, EPI_ISL_779717, EPI_ISL_779718, EPI_ISL_779719, EPI_ISL_779720, EPI_ISL_779721, EPI_ISL_779722, EPI_ISL_779723, EPI_ISL_779724, EPI_ISL_779725, EPI_ISL_779726, EPI_ISL_779727, EPI_ISL_779728, EPI_ISL_779729, EPI_ISL_779730, EPI_ISL_779731, EPI_ISL_779732, EPI_ISL_779733, EPI_ISL_779734, EPI_ISL_779735, EPI_ISL_779736, EPI_ISL_779737, EPI_ISL_779738, EPI_ISL_779739, EPI_ISL_779740, EPI_ISL_779741, EPI_ISL_779742, EPI_ISL_779743, EPI_ISL_779744, EPI_ISL_779745, EPI_ISL_779746, EPI_ISL_779747, EPI_ISL_779748, EPI_ISL_779749, EPI_ISL_779750, EPI_ISL_779751, EPI_ISL_779752, EPI_ISL_779753, EPI_ISL_779754, EPI_ISL_779755, EPI_ISL_779756, EPI_ISL_779757, EPI_ISL_779758, EPI_ISL_779759, EPI_ISL_779760, EPI_ISL_779761, EPI_ISL_779762, EPI_ISL_779763, EPI_ISL_779764, EPI_ISL_779765, EPI_ISL_779766, EPI_ISL_779767, EPI_ISL_779768, EPI_ISL_779769, EPI_ISL_779770, EPI_ISL_779771, EPI_ISL_779772, EPI_ISL_779773, EPI_ISL_779774, EPI_ISL_779775, EPI_ISL_779776, EPI_ISL_779777, EPI_ISL_779778, EPI_ISL_779779, EPI_ISL_779780, EPI_ISL_779781, EPI_ISL_779782, EPI_ISL_779783, EPI_ISL_779784, EPI_ISL_779785, EPI_ISL_779786, EPI_ISL_779787, EPI_ISL_779788, EPI_ISL_779789, EPI_ISL_779790, EPI_ISL_779791, EPI_ISL_779792, EPI_ISL_779793, EPI_ISL_779794, EPI_ISL_779795, EPI_ISL_779796, EPI_ISL_779797, EPI_ISL_779798, EPI_ISL_779799, EPI_ISL_779800, EPI_ISL_779801, EPI_ISL_779802, EPI_ISL_779803, EPI_ISL_779804, EPI_ISL_779805, EPI_ISL_779806, EPI_ISL_779807, EPI_ISL_779808, EPI_ISL_779809, EPI_ISL_779810, EPI_ISL_779811, EPI_ISL_779812, EPI_ISL_779813, EPI_ISL_779814, EPI_ISL_779815, EPI_ISL_779816, EPI_ISL_779817, EPI_ISL_779818, EPI_ISL_779819, EPI_ISL_779820, EPI_ISL_779821, EPI_ISL_779822, EPI_ISL_779823, EPI_ISL_779824, EPI_ISL_779825, EPI_ISL_779826, EPI_ISL_779827, EPI_ISL_779828, EPI_ISL_779829, EPI_ISL_779830, EPI_ISL_779831, EPI_ISL_779832, EPI_ISL_779833, EPI_ISL_779834, EPI_ISL_779835, EPI_ISL_779836, EPI_ISL_779837, EPI_ISL_779838, EPI_ISL_779839, EPI_ISL_779840, EPI_ISL_779841, EPI_ISL_779842, EPI_ISL_779843, EPI_ISL_779844, EPI_ISL_779845, EPI_ISL_779846, EPI_ISL_779847, EPI_ISL_779848, EPI_ISL_779849, EPI_ISL_779850, EPI_ISL_779851, EPI_ISL_779852, EPI_ISL_779853, EPI_ISL_779854, EPI_ISL_779855, EPI_ISL_779856, EPI_ISL_779857, EPI_ISL_779858, EPI_ISL_779859, EPI_ISL_779860, EPI_ISL_779861, EPI_ISL_779862, EPI_ISL_779863, EPI_ISL_779864, EPI_ISL_779865, EPI_ISL_779866, EPI_ISL_779867, EPI_ISL_779868, EPI_ISL_779869, EPI_ISL_779870, EPI_ISL_779871, EPI_ISL_779872, EPI_ISL_779873, EPI_ISL_779874, EPI_ISL_779875, EPI_ISL_779876, EPI_ISL_779877, EPI_ISL_779878, EPI_ISL_779879, EPI_ISL_779880, EPI_ISL_779881, EPI_ISL_779882, EPI_ISL_779883, EPI_ISL_779884, EPI_ISL_779885, EPI_ISL_779886, EPI_ISL_779887, EPI_ISL_779888, EPI_ISL_779889, EPI_ISL_779890, EPI_ISL_779891, EPI_ISL_779892, EPI_IS |                                                                                                      |                                                                                            |                                                                                                                                                                                                                                                                                                                                                                                                                                                                                                                                                                                                                                                                                                                                                                                        |                                                                                                                                                                                                                                                                                               |

|                                                                                                                                                                                                                                                                                                                                                                                |                                                                                                             |                                                                                                                                                                                                 |                                                                                                                                                                                                                                                                                                                                                                                                                                                                                                                                                                                                                                                                                                                                                             |  |
|--------------------------------------------------------------------------------------------------------------------------------------------------------------------------------------------------------------------------------------------------------------------------------------------------------------------------------------------------------------------------------|-------------------------------------------------------------------------------------------------------------|-------------------------------------------------------------------------------------------------------------------------------------------------------------------------------------------------|-------------------------------------------------------------------------------------------------------------------------------------------------------------------------------------------------------------------------------------------------------------------------------------------------------------------------------------------------------------------------------------------------------------------------------------------------------------------------------------------------------------------------------------------------------------------------------------------------------------------------------------------------------------------------------------------------------------------------------------------------------------|--|
| EPI_ISL_648319                                                                                                                                                                                                                                                                                                                                                                 | Laboratorio de Investigaciones de Baney                                                                     | University Hospital Basel, Clinical Bacteriology                                                                                                                                                | Adrian Egli; Alfredo Mari; Bonifacio Manguire Nlavo; Carlos Cortes; Claudia Daubenberger; Diosdado Ojama Nseng Ada; Elizabeth Nyakarungu; Guillermo Garcia; Helena Seth-Smith; Madlen Stange; Maximilian Mpina; Mitoha Ondo O Ayekaba; Philip Wonder Phiri; Salome Hosch; Tim Rolloff; Tobias Schindler                                                                                                                                                                                                                                                                                                                                                                                                                                                     |  |
| EPI_ISL_491461                                                                                                                                                                                                                                                                                                                                                                 | Laboratorio de Referencia Nacional de Virus Respiratorio. Instituto Nacional de Salud Perú                  | Laboratorio de Referencia Nacional de Biotecnología y Biología Molecular. Instituto Nacional de Salud Perú                                                                                      | Carlos Padilla Rojas; Henri Bailon Calderon; Johanna Balbuena Torrez; Karolyn Vega Chozo; Marco Galarza Perez; Maribel Huaringa Nuñez; Nancy Rojas Serrano; Omar Caceres Rey; Priscila Lope Pari                                                                                                                                                                                                                                                                                                                                                                                                                                                                                                                                                            |  |
| EPI_ISL_514264                                                                                                                                                                                                                                                                                                                                                                 | Laboratorio de Referencia Nacional de Virus Respiratorio. Instituto Nacional de Salud. Perú                 | Laboratorio de Referencia Nacional de Biotecnología y Biología Molecular. Instituto Nacional de Salud. Perú                                                                                     | Carlos Padilla Rojas; Henri Bailon Calderon; Johanna Balbuena Torrez; Karolyn Vega Chozo; Marco Galarza Perez; Maribel Huaringa Nuñez; Nancy Rojas Serrano; Omar Caceres Rey; Priscila Lope Pari                                                                                                                                                                                                                                                                                                                                                                                                                                                                                                                                                            |  |
| EPI_ISL_482468                                                                                                                                                                                                                                                                                                                                                                 | Laboratorio de Referencia Nacional de Virus Respiratorios. Instituto Nacional de Salud Peru                 | Laboratorio de Referencia Nacional de Biotecnología y Biología Molecular. Instituto Nacional de Salud Peru                                                                                      | Carlos Padilla Rojas; Henri Bailon Calderon; Johanna Balbuena Torres; Karolyn Vega Chozo; Maribel Huaringa Nuñez; Nancy Rojas Serrano; Omar Caceres Rey; Priscila Lope Pari                                                                                                                                                                                                                                                                                                                                                                                                                                                                                                                                                                                 |  |
| EPI_ISL_430814                                                                                                                                                                                                                                                                                                                                                                 | Laboratorio de Virología del Hospital de Niños Dr. Ricardo Gutierrez                                        | Área de Secuenciación del Laboratorio de Virología del Hospital de Niños Dr. Ricardo Gutierrez on behalf of "Proyecto Argentino Interinstitucional de genómica de SARS-CoV-2" (PAIS Consortium) | AS; E; Goya; Gravis; LE; Lusso; MI; MS; Mstchenko; Nabaes Jodar; Natale; S; Valinotto; Viegas, M.                                                                                                                                                                                                                                                                                                                                                                                                                                                                                                                                                                                                                                                           |  |
| EPI_ISL_1340619, EPI_ISL_1340634, EPI_ISL_1340654                                                                                                                                                                                                                                                                                                                              | Laboratorios BIMODI                                                                                         | Instituto de Diagnostico y Referencia Epidemiologicos (INDRE)                                                                                                                                   | Abril Rodriguez-Maldonado; Ariadna Medina-Benitez; Claudia Wong-Arambula; Ernesto Ramirez-Gonzalez.; Gisela Barrera-Badillo; Irma Lopez-Martinez; Joaquin Quiroz-Mercado; Lucia Hernandez-Rivas; Natividad Cruz-Ortiz; Sergio Rangel-Guerrero; Tatiana Nunez-Garcia; Vanessa Rivero-Arredondo                                                                                                                                                                                                                                                                                                                                                                                                                                                               |  |
| EPI_ISL_1340613                                                                                                                                                                                                                                                                                                                                                                | Laboratorios DIAGNOMOL                                                                                      | Instituto de Diagnostico y Referencia Epidemiologicos (INDRE)                                                                                                                                   | Abril Rodriguez-Maldonado; Ariadna Medina-Benitez; Claudia Wong-Arambula; Ernesto Ramirez-Gonzalez.; Gisela Barrera-Badillo; Irma Lopez-Martinez; Joaquin Quiroz-Mercado; Lucia Hernandez-Rivas; Natividad Cruz-Ortiz; Sergio Rangel-Guerrero; Tatiana Nunez-Garcia; Vanessa Rivero-Arredondo                                                                                                                                                                                                                                                                                                                                                                                                                                                               |  |
| EPI_ISL_1359062                                                                                                                                                                                                                                                                                                                                                                | Laboratorios LISTER                                                                                         | Instituto de Diagnostico y Referencia Epidemiologicos (INDRE)                                                                                                                                   | Abril Rodriguez-Maldonado; Ariadna Medina-Benitez; Claudia Wong-Arambula; Ernesto Ramirez-Gonzalez.; Gisela Barrera-Badillo; Irma Lopez-Martinez; Joaquin Quiroz-Mercado; Lucia Hernandez-Rivas; Natividad Cruz-Ortiz; Sergio Rangel-Guerrero; Tatiana Nunez-Garcia; Vanessa Rivero-Arredondo                                                                                                                                                                                                                                                                                                                                                                                                                                                               |  |
| EPI_ISL_961466, EPI_ISL_1334380, EPI_ISL_1334382, EPI_ISL_1334385                                                                                                                                                                                                                                                                                                              | Laboratorios Lister                                                                                         | Instituto de Diagnostico y Referencia Epidemiologicos (INDRE)                                                                                                                                   | Abril Rodriguez-Maldonado; Ariadna Medina-Benitez; Claudia Wong-Arambula; Ernesto Ramirez-Gonzalez.; Fabiola Garces-Ayala; Gisela Barrera-Badillo; Irma Lopez-Martinez; Joaquin Quiroz-Mercado; Lucia Hernandez-Rivas; Natividad Cruz-Ortiz; Sergio Rangel-Guerrero; Tatiana Nunez-Garcia; Vanessa Rivero-Arredondo                                                                                                                                                                                                                                                                                                                                                                                                                                         |  |
| EPI_ISL_435045                                                                                                                                                                                                                                                                                                                                                                 | Laboratory of Applied Genetics                                                                              | RSE "National Center for Biotechnology"                                                                                                                                                         | Alexandr Shevtsov; Asylulan Amirgazin; Ilyas Akhmetollayev; Ruslan Kalendar; Viktoriya Lutsay; Yerlan Ramanculov                                                                                                                                                                                                                                                                                                                                                                                                                                                                                                                                                                                                                                            |  |
| EPI_ISL_434468                                                                                                                                                                                                                                                                                                                                                                 | Laboratory of Microbiology, Medical School, National and Kapodistrian University of Athens                  | Laboratory of Biology, Department of Medicine, Democritus University of Thrace                                                                                                                  | Bampali, M.; Dovrolis, N.; Froukala, E.; Gatzidou, E.; Kassela K.; N. and Karakasiotis, I.; Spanakis; Stavropoulou, A.; Tsakris, A.; Velezta, S.                                                                                                                                                                                                                                                                                                                                                                                                                                                                                                                                                                                                            |  |
| EPI_ISL_451646                                                                                                                                                                                                                                                                                                                                                                 | Laboratory of Molecular Biology, Diagnostyka sp. z o.o.                                                     | Laboratory of Recombinant Vaccines                                                                                                                                                              | Anna Piotrowska-Mietelska; Boguslaw Szewczyk; Krystyna Bienkowska-Szewczyk; Lukasz Rabalski; Maciej Kosinski                                                                                                                                                                                                                                                                                                                                                                                                                                                                                                                                                                                                                                                |  |
| EPI_ISL_639639                                                                                                                                                                                                                                                                                                                                                                 | Latvijas Infektoloģijas centrs                                                                              | Latvian Biomedical Research and Study Centre                                                                                                                                                    | Ivars Silamķēlis; Jelena Storoženko; Jānis Kloviņš; Kaspars Megnis; Monta Ustinova; Oksana Savicka; Tatjana Kolupajeva; Uga Dumpis; Vita Rovite; Nīkita Zrelovs                                                                                                                                                                                                                                                                                                                                                                                                                                                                                                                                                                                             |  |
| EPI_ISL_498552                                                                                                                                                                                                                                                                                                                                                                 | Lebanese American University                                                                                | Lebanese American University                                                                                                                                                                    | Abdallah, J.; Abi Habib, W.; El Shesheny, R.; Goldstein: J. and Kayali, G.; Mokhbat, J.; R.J.; Webby                                                                                                                                                                                                                                                                                                                                                                                                                                                                                                                                                                                                                                                        |  |
| EPI_ISL_538890, EPI_ISL_538900, EPI_ISL_538963, EPI_ISL_538976, EPI_ISL_539123, EPI_ISL_539172                                                                                                                                                                                                                                                                                 | Leeds Teaching Hospitals NHS Trust and Public Health England, National Infection Service (Leeds laboratory) | Wellcome Sanger Institute for the COVID-19 Genomics UK (COG-UK) consortium                                                                                                                      | Antony Hale and Alex Alderton; Cordelia Langford; David K. Jackson; Dominic Kwiatkowski; Ewan Harrison; Holli Carden; Ian Johnston; John Sillitoe on behalf of the Wellcome Sanger Institute COVID-19 Surveillance Team; Katherine L. Harper; Louissa Macfarlane-Smith; Roberto Amato; Sonia Goncalves                                                                                                                                                                                                                                                                                                                                                                                                                                                      |  |
| EPI_ISL_551318, EPI_ISL_554172, EPI_ISL_554694, EPI_ISL_556143, EPI_ISL_558199, EPI_ISL_558906, EPI_ISL_558933, EPI_ISL_558971, EPI_ISL_559053, EPI_ISL_559410, EPI_ISL_559423, EPI_ISL_559586, EPI_ISL_559611, EPI_ISL_559630, EPI_ISL_559631, EPI_ISL_567654, EPI_ISL_567792, EPI_ISL_568172, EPI_ISL_575413, EPI_ISL_580650, EPI_ISL_581444, EPI_ISL_589424, EPI_ISL_590306 | see above                                                                                                   | Lighthouse Lab in Alderley Park                                                                                                                                                                 | Cordelia Langford; David K. Jackson; Dominic Kwiatkowski; Ewan Harrison; Ian Johnston; Jacquelyn Wynn; John Sillitoe on behalf of the Wellcome Sanger Institute COVID-19 Surveillance Team; John Sillitoe on behalf of the Wellcome Sanger Institute COVID-19 Surveillance Team (http://www.sanger.ac.uk/covid-team); Mairead Hyland; Roberto Amato; Sonia Goncalves; The Lighthouse Lab in Alderley Park and Alex Alderton                                                                                                                                                                                                                                                                                                                                 |  |
| EPI_ISL_552051                                                                                                                                                                                                                                                                                                                                                                 | Lighthouse Lab in Cambridge                                                                                 | Wellcome Sanger Institute for the COVID-19 Genomics UK (COG-UK) consortium                                                                                                                      | Cordelia Langford; David K. Jackson; Dominic Kwiatkowski; Ewan Harrison; Ian Johnston; John Sillitoe on behalf of the Wellcome Sanger Institute COVID-19 Surveillance Team; Rob Howes; Roberto Amato; Sonia Goncalves; The Lighthouse Lab in Cambridge and Alex Alderton                                                                                                                                                                                                                                                                                                                                                                                                                                                                                    |  |
| EPI_ISL_531685, EPI_ISL_531901, EPI_ISL_532239, EPI_ISL_533364, EPI_ISL_536972, EPI_ISL_540217, EPI_ISL_540362, EPI_ISL_549707, EPI_ISL_567431, EPI_ISL_581030, EPI_ISL_590273, EPI_ISL_590323, EPI_ISL_590381, EPI_ISL_590540, EPI_ISL_602019                                                                                                                                 | see above                                                                                                   | Lighthouse Lab in Glasgow                                                                                                                                                                       | Anna Dominiczak and Alex Alderton; Carol Clugston; Cordelia Langford; David Gray; David K. Jackson; Dominic Kwiatkowski; Ewan Harrison; Harper VanSteenhouse; Ian Johnston; John Sillitoe; John Sillitoe on behalf of the Wellcome Sanger Institute COVID-19 Surveillance Team; John Sillitoe on behalf of the Wellcome Sanger Institute COVID-19 Surveillance Team (http://www.sanger.ac.uk/covid-team); Roberto Amato; Sonia Goncalves; Yumi Kasai                                                                                                                                                                                                                                                                                                        |  |
| EPI_ISL_549868, EPI_ISL_551028, EPI_ISL_551955, EPI_ISL_552340, EPI_ISL_553185, EPI_ISL_554217, EPI_ISL_554221, EPI_ISL_557456, EPI_ISL_557984, EPI_ISL_558361                                                                                                                                                                                                                 | see above                                                                                                   | Lighthouse Lab in Milton Keynes                                                                                                                                                                 | Cordelia Langford; David K. Jackson; Dominic Kwiatkowski; Ewan Harrison; Ian Johnston; John Sillitoe on behalf of the Wellcome Sanger Institute COVID-19 Surveillance Team (http://www.sanger.ac.uk/covid-team); Roberto Amato; Sonia Goncalves; The Lighthouse Lab in Milton Keynes and Alex Alderton                                                                                                                                                                                                                                                                                                                                                                                                                                                      |  |
| EPI_ISL_484371                                                                                                                                                                                                                                                                                                                                                                 | Lincolnshire Hospitals and DeepSeq Nottingham                                                               | COVID-19 Genomics UK (COG-UK) Consortium                                                                                                                                                        | Christopher Moore; Fei Sang; Joseph Chappell; Johnny Debebe; Jonathan Ball; Matthew Carlisle; Matthew Loose; Nadine Holmes; Nichola Duckworth; Patrick McClure; Sarah Walsh; Tim Sloan; Victoria Wright                                                                                                                                                                                                                                                                                                                                                                                                                                                                                                                                                     |  |
| EPI_ISL_1008713                                                                                                                                                                                                                                                                                                                                                                | Lister Laboratorio de Referencia S.A. de C.V.                                                               | Instituto de diagnóstico y Referencia Epidemiologicos (INDRE) Departamento de Virologia                                                                                                         | Abril Rodriguez-Maldonado; Claudia Wong-Arambula; Ernesto Ramirez-Gonzalez.; Fabiola Garces-Ayala; Gisela Barrera-Badillo; Irma Lopez-Martinez; Lucia Hernandez-Rivas; Natividad Cruz-Ortiz; Tatiana Nunez-Garcia                                                                                                                                                                                                                                                                                                                                                                                                                                                                                                                                           |  |
| EPI_ISL_603082, EPI_ISL_636843                                                                                                                                                                                                                                                                                                                                                 | Lithuanian University of Health Sciences Hospital, Department of Laboratory Medicine                        | Lithuanian University of Health Sciences, Molecular cardiology lab.                                                                                                                             | Arnolds Pautienius; Astra Vitkauskiene; Dovydas Gecys; Ingrida Olendraitė; Kamile Tamauskaite; Laura Pareckaite; Lukas Zemaitis; Vaiva Lesauskaite                                                                                                                                                                                                                                                                                                                                                                                                                                                                                                                                                                                                          |  |
| EPI_ISL_439681, EPI_ISL_439812, EPI_ISL_472119, EPI_ISL_499705, EPI_ISL_499711, EPI_ISL_500040, EPI_ISL_517076, EPI_ISL_517236, EPI_ISL_517498                                                                                                                                                                                                                                 | see above                                                                                                   | Liverpool Clinical Laboratories                                                                                                                                                                 | A Alrezaihi; Alessandro Gerada; Alistair Darby; Angela Cowell; Anita Lucaci; Anu Chawla; Cassie Olateji; Catherine Hartley; Charlotte Nelson; Ecaterina Vamos; Elaine O'Toole; Elaine O,ÀToole; Eleanor G Bentley; Ghada T Shawli; Isabel Garcia-Dorival; Isabel Garcv'aa-Dorival; James Johnson; James P Stewart; Jenifer Manson; Joanne Watts; Jones Benjamin; Jordan J Clark; Julian Hiscox; L Luu; Lucille Rainbow; M Almsaud; Margaret Hughes; Mark Whitehead; Matthew Gemmell; Miren Iturriza-Gomara; Muhannad Alruwaili; N.P Randle; Neil Swainston; PKF Gilmore; Parul Sharma; Rebekah Penrice-Randal; Rebekah Penrice-Randal-†; Richard Eccles; Richard Gregory; Sam Haldenby; Steve Paterson; Stuart D Armstrong; Trevor Ian Robinson; Ximeng Han |  |
| EPI_ISL_477277                                                                                                                                                                                                                                                                                                                                                                 | M Health Fairview                                                                                           | Minnesota Department of Health, Public Health Laboratory                                                                                                                                        | Jacob Garfin; Kelly Pung; Matt Plumb; and Xiong Wang                                                                                                                                                                                                                                                                                                                                                                                                                                                                                                                                                                                                                                                                                                        |  |
| EPI_ISL_568998, EPI_ISL_569036, EPI_ISL_569295                                                                                                                                                                                                                                                                                                                                 | MEPHI, Aix Marseille University                                                                             | MEPHI, Aix Marseille University                                                                                                                                                                 | Anthony LEVASSEUR                                                                                                                                                                                                                                                                                                                                                                                                                                                                                                                                                                                                                                                                                                                                           |  |
| EPI_ISL_471163, EPI_ISL_561164                                                                                                                                                                                                                                                                                                                                                 | MRCG at LSHTM Genomics lab                                                                                  | MRCG at LSHTM Genomics lab                                                                                                                                                                      | Abdoulie Kanteh; Abdul Karim sesay; Bakary Sanyang; Jarra Manneh; Mariama Kujabi; Sesay et al                                                                                                                                                                                                                                                                                                                                                                                                                                                                                                                                                                                                                                                               |  |
| EPI_ISL_428855                                                                                                                                                                                                                                                                                                                                                                 | MRCG at LSHTM Geomics lab                                                                                   | MRCG at LSHTM Genomics lab                                                                                                                                                                      | Sesay et al                                                                                                                                                                                                                                                                                                                                                                                                                                                                                                                                                                                                                                                                                                                                                 |  |
| EPI_ISL_450014, EPI_ISL_450047, EPI_ISL_450092, EPI_ISL_450108                                                                                                                                                                                                                                                                                                                 | MSHS Clinical Microbiology Laboratories                                                                     | MSHS Pathogen Surveillance Program                                                                                                                                                              | Adolfo Garcia-Sastre; Ajay Obla; Alberto Paniz-mondolfi; Ana S. Gonzalez-Reiche; Bremy Alburquerque; Emilia Sordillo; Florian Krammer; Gopi Patel; Harm van Bakel; Jayeeta Dutta; Jose Polanco; Juan Soto; Judith Aberg; Lisa Miorin; Matthew Hernandez; Melissa Gitman; Melissa Smith; Mitchell Sullivan; Randy Albrecht; Robert Sebra; Shelcie Fabre; Shwetha Sridhar Hara; Viviana Simon; Wen-chun Liu; Ying-Chih Wang; Zenab Khan                                                                                                                                                                                                                                                                                                                       |  |
| EPI_ISL_631528                                                                                                                                                                                                                                                                                                                                                                 | Maimonides Medical Center                                                                                   | New York City Public Health Laboratory                                                                                                                                                          | Jade Wang; et al.                                                                                                                                                                                                                                                                                                                                                                                                                                                                                                                                                                                                                                                                                                                                           |  |
| EPI_ISL_428348                                                                                                                                                                                                                                                                                                                                                                 | Maison de Santé du Val d'Ormois                                                                             | National Reference Center for Viruses of Respiratory Infections, Institut Pasteur, Paris                                                                                                        | Angela Brisebarre; Etienne Simon-Lorière; Flora Donati; Marion Barbet; Maud Vanpeene; Mélanie Albert; Méline Bizard; Sylvie Behillili; Sylvie van der Werf; Vincent Enouf                                                                                                                                                                                                                                                                                                                                                                                                                                                                                                                                                                                   |  |
| EPI_ISL_460202, EPI_ISL_460207                                                                                                                                                                                                                                                                                                                                                 | Massachusetts General Hospital                                                                              | Infectious Disease Program, Broad Institute of Harvard and MIT                                                                                                                                  | A.E.; Adams, G.; Anahtar, M.; B.L.; B.W.; Bauer, M.; Birren; Branda, J.; Carter, A.; Cerrato, F.; Chaluvadi, S.; Chapman; Cusick, C.; D.J.; DeRuff, K.; Flowers, K.; Gallagher, G.; Gladden-Young, A.; Gnirke, A.; Harris, J.; J.E.; K.J.; LaRocque, R.; Lagerborg, K.; Lemieux; Lin; Loreth, C.; MacInnis; Neumann, A.; Normandin, E.; P.C.; Park; Pierce, V.; Reilly, S.; Rosenberg, E.; Rudy, M.; Ryan, E.; S.B.; Sabeti; Shaw, B.; Siddie; Slater, D.; Smole, S.; Tomkins-Tinch, C.; Turbett, S.                                                                                                                                                                                                                                                        |  |
| EPI_ISL_515832                                                                                                                                                                                                                                                                                                                                                                 | Medical Disagnostics Services (MDS)                                                                         | KRISP, KZN Research Innovation and Sequencing Platform                                                                                                                                          | ChimukangaraB; Giandhari J; Khan S; Lessells R; Mdlatose K; Pillay S; Tegally H; Wilkinson E; York D; de Oliveira T                                                                                                                                                                                                                                                                                                                                                                                                                                                                                                                                                                                                                                         |  |
| EPI_ISL_435281                                                                                                                                                                                                                                                                                                                                                                 | Medistra Hospital Jakarta                                                                                   | Eijkman Institute for Molecular Biology, Ministry of Research and Technology/National Agency for Research and Innovation                                                                        | Amin Soebandrio; David H Muljono; Edison Johar; Frilasita A Yudhaputri; Hidayat Trimarsanto; Khin Saw Myint; Safarina G Malik                                                                                                                                                                                                                                                                                                                                                                                                                                                                                                                                                                                                                               |  |
| EPI_ISL_516269                                                                                                                                                                                                                                                                                                                                                                 | Michigan Department of Health and Human Services, Bureau of Laboratories                                    | Michigan Department of Health and Human Services, Bureau of Laboratories                                                                                                                        | Blankenship HM; Riner D; Soehnlén MK                                                                                                                                                                                                                                                                                                                                                                                                                                                                                                                                                                                                                                                                                                                        |  |
| EPI_ISL_480333                                                                                                                                                                                                                                                                                                                                                                 | Microbial Genomics Laboratory, Institut Pasteur de Montevideo                                               | Microbial Genomics Laboratory, Institut Pasteur de Montevideo                                                                                                                                   | Cecilia Salazar; Gonzalo Moratorio; Gregorio Iraola; Ignacio Ferrés; Marianoel Pereira; Pilar Moreno                                                                                                                                                                                                                                                                                                                                                                                                                                                                                                                                                                                                                                                        |  |
| EPI_ISL_480772                                                                                                                                                                                                                                                                                                                                                                 | Microbiological Diagnostic Unit - Public Health Laboratory (MDU-PHL)                                        | MDU-PHL                                                                                                                                                                                         | Sait, M.; Schultz M.; Seemann T.; Sherry, N.                                                                                                                                                                                                                                                                                                                                                                                                                                                                                                                                                                                                                                                                                                                |  |
| EPI_ISL_447274                                                                                                                                                                                                                                                                                                                                                                 | Microbiology laboratory, Assuta Ashdod University-Affiliated Hospital                                       | Stern Lab                                                                                                                                                                                       | Stern Lab                                                                                                                                                                                                                                                                                                                                                                                                                                                                                                                                                                                                                                                                                                                                                   |  |
| EPI_ISL_613700                                                                                                                                                                                                                                                                                                                                                                 | Microbiology, Department of Pathology, St. Bernard's Hospital, Gibraltar Health Authority                   | Respiratory Virus Unit, Microbiology Services Colindale, Public Health England                                                                                                                  | Charlotte Giltborn-Jones (Gibraltar); Dr Nicholas Cortes (Gibraltar); PHE Covid Sequencing Team                                                                                                                                                                                                                                                                                                                                                                                                                                                                                                                                                                                                                                                             |  |



|                                                                                                                                             |                                                                                                                                                                                                                     |                                                                                                                            |                                                                                                                                                                                                                                                                                                                                                                                                                                                                                                                                                                                                                                                                                                                                      |
|---------------------------------------------------------------------------------------------------------------------------------------------|---------------------------------------------------------------------------------------------------------------------------------------------------------------------------------------------------------------------|----------------------------------------------------------------------------------------------------------------------------|--------------------------------------------------------------------------------------------------------------------------------------------------------------------------------------------------------------------------------------------------------------------------------------------------------------------------------------------------------------------------------------------------------------------------------------------------------------------------------------------------------------------------------------------------------------------------------------------------------------------------------------------------------------------------------------------------------------------------------------|
| EPI_ISL_429873,<br>EPI_ISL_437310                                                                                                           | Ministry of Health Turkey                                                                                                                                                                                           | Ministry of Health Turkey                                                                                                  | Ayşe Başak Altaş; Fatma Bayrakdar; Gülay Korukluoğlu; Selçuk Kılıç; Süleyman Yalçın; Tülin Demir; Yasemin Coşgun                                                                                                                                                                                                                                                                                                                                                                                                                                                                                                                                                                                                                     |
| EPI_ISL_417474,<br>EPI_ISL_419395,<br>EPI_ISL_450780,<br>EPI_ISL_483013                                                                     | Minnesota Department of Health, Public Health Laboratory                                                                                                                                                            | Minnesota Department of Health, Public Health Laboratory                                                                   | Jacob Garfin; Jake Garfin and Xiong Wang; Matt Plumb; and Xiong Wang                                                                                                                                                                                                                                                                                                                                                                                                                                                                                                                                                                                                                                                                 |
| EPI_ISL_435135                                                                                                                              | Mohammed Bin Rashid University of Medicine and Health Sciences                                                                                                                                                      | Al Jalila Genomics Center                                                                                                  | Abdumajeed Alkhaja; Abiola Catherine Senok; Ahmad Abou Tayoun; Alawi Alsheikh-Ali; Divinlal Harilal; Hamda Khansaheb; Hanan Al Suwaidi; Mohammed Uddin; Norbert Nowotny; Qutayba Hamid; Rabih Halwani; Rifat Hamoudi; Rupa Murthy Varghese; Sathishkumar Ramaswamy; Tom Loney; Zulfia Omar Deesi                                                                                                                                                                                                                                                                                                                                                                                                                                     |
| EPI_ISL_467486,<br>EPI_ISL_467494,<br>EPI_ISL_487336,<br>EPI_ISL_487338                                                                     | Molecular Diagnostics Services (MDS)                                                                                                                                                                                | KRISP, KZN Research Innovation and Sequencing Platform                                                                     | Chimukangara B; Giandhari J; Khan S; Lessells R; Mdlalose K; Pillay S; Tegally H; Wilkinson E; York D; de Oliveira T                                                                                                                                                                                                                                                                                                                                                                                                                                                                                                                                                                                                                 |
| EPI_ISL_451307                                                                                                                              | Molecular Virology Unit, Fondazione IRCCS Policlinico San Matteo , Pavia                                                                                                                                            | Laboratory of Virology, INMI Lazzaro Spallanzani IRCCS                                                                     | Antonino Di Caro; Antonio Piralla; Barbara Bartolini; Cesare E.M. Gruber; Fausto Baldanti; Maria R. Capobianchi; Martina Rueca                                                                                                                                                                                                                                                                                                                                                                                                                                                                                                                                                                                                       |
| EPI_ISL_486821,<br>EPI_ISL_486822,<br>EPI_ISL_486829                                                                                        | Molecular diagnostic laboratory of Federal Budget Institution of Science "Central Research Institute of Epidemiology" of The Federal Service on Customers' Rights Protection and Human Well-being Surveillance      | Group of Genomics and Postgenomic Technologies of Central Research Institute of Epidemiology                               | Akimkin VG; Bulanenko VP; Kaptelova VV; Korneenko EV; Samoilov AE; Shipulina OY; Speranskaya AS; Tivanova EV; Valdokhina AV                                                                                                                                                                                                                                                                                                                                                                                                                                                                                                                                                                                                          |
| EPI_ISL_614351                                                                                                                              | Molecular diagnostic unit for viral haemorrhagic fevers and emerging viruses, Bouaké CHU Laboratory                                                                                                                 | Project group Epidemiology of Highly Pathogenic Microorganisms, Robert Koch-Institute                                      | Adjaratou Traoré; Bamba Fatoumata Touré; Chantal Akoua-Koffi; Coulibaly Mbegnan; Diané Bamourou; Essia Belarbi; Etilé Anoh; Fabian Leendertz; Grit Schubert; Kra Ouffoué; Monemo Pacome; Safiatou Karidioula; Soundélé Maité                                                                                                                                                                                                                                                                                                                                                                                                                                                                                                         |
| EPI_ISL_467493, EPI_ISL_482726, EPI_ISL_487314, EPI_ISL_495527, EPI_ISL_495543, EPI_ISL_509368, EPI_ISL_602659, EPI_ISL_602894<br>see above | NHLS-IALCH                                                                                                                                                                                                          | KRISP, KZN Research Innovation and Sequencing Platform                                                                     | Chimukangara B; Giandhari J; Khan S; Lessells R; Mdlalose K; Pillay S; Tegally H; Wilkinson E; York D; de Oliveira T                                                                                                                                                                                                                                                                                                                                                                                                                                                                                                                                                                                                                 |
| EPI_ISL_459102, EPI_ISL_469965, EPI_ISL_489620, EPI_ISL_489693, EPI_ISL_501634, EPI_ISL_524527, EPI_ISL_532876, EPI_ISL_533016<br>see above | NHSGGC West of Scotland Specialist Virology Centre / MRC-University of Glasgow Centre for Virus Research                                                                                                            | Wellcome Sanger Institute for the COVID-19 Genomics UK (COG-UK) consortium                                                 | Alasdair MacLean; Alice Broos; Ana da Silva Filipe; Antonia Ho; Cordelia Langford; Daniel Mair; David K. Jackson; David L Robertson; Dominic Kwiatkowski; Elihu Aranday-Cortes; Emma Thomson and Alex Alderton; Ewan Harrison; Ian Johnston; James Shepherd; Jenna Nichols; John Sillitoe; John Allan; John Sillitoe on behalf of the Wellcome Sanger Institute COVID-19 Surveillance Team (http://www.sanger.ac.uk/covid-team); Joseph Hughes; Kathy Li; Kathy Smollett; Kirstyn Brunker; Kyriaki Nomiku; Lily Tong; Marc Niebel; Natasha Jesudason; Natasha Johnson; Patawee Asamaphan; Rajiv Shah; Richard Orton; Roberto Amato; Rory Gunson; Sarah McDonald; Sonia Goncalves; Sreenu Vattipally; Stephen Carmichael; Yasmin Parr |
| EPI_ISL_452211,<br>EPI_ISL_452214,<br>EPI_ISL_454529,<br>EPI_ISL_454563,<br>EPI_ISL_454569                                                  | NIV Influenza                                                                                                                                                                                                       | NIV Influenza                                                                                                              | Potdar V                                                                                                                                                                                                                                                                                                                                                                                                                                                                                                                                                                                                                                                                                                                             |
| EPI_ISL_452117                                                                                                                              | NJ Public Health and Environmental Laboratories                                                                                                                                                                     | Pathogen Discovery, Respiratory Viruses Branch, Division of Viral Diseases, Centers for Disease Control and Prevention     | Alison S. Laufer Halpin; Anna Montmayeur; Anna Uehara; Christopher A. Elkins; Clinton R. Paden; Haibin Wang; Jing Zhang; Krista Queen; Mary S. Keckler; Rachel Marine; Suxiang Tong; Yan Li; Ying Tao; Zachary Weiner                                                                                                                                                                                                                                                                                                                                                                                                                                                                                                                |
| EPI_ISL_488505,<br>EPI_ISL_488766,<br>EPI_ISL_488826,<br>EPI_ISL_492923                                                                     | NU-OMICS DNA Sequencing research facility, Northumbria University                                                                                                                                                   | Wellcome Sanger Institute for the COVID-19 Genomics UK (COG-UK) consortium                                                 | Andrew Nelson; Brendan Payne; Chris Duncan; Clive Graham; Cordelia Langford; Darren Smith and Alex Alderton; David K. Jackson; Debra Padgett; Dominic Kwiatkowski; Edward Barton; Emma Swindells; Ewan Harrison; Garren Scott; Gary Black; Gary Eltringham; Greg Young; Ian Johnston; Jane Greenaway; Jennifer Collins; John Allan; John Sillitoe on behalf of the Wellcome Sanger Institute COVID-19 Surveillance Team (http://www.sanger.ac.uk/covid-team); Joshua Loh; Lynn Dover; Matthew Bashton; Paul Baker; Roberto Amato; Sarah Essex; Sheila Waugh; Shirelle Burton-Fanning; Sonia Goncalves; Steve Liggett; Wen Yew; Yusri Taha                                                                                            |
| EPI_ISL_436048                                                                                                                              | NYC Department of Health and Mental Hygiene                                                                                                                                                                         | Pathogen Discovery, Respiratory Viruses Branch, Division of Viral Diseases, Centers for Disease Control and Prevention     | Anna Uehara; Bettina Bankamp; Christy Harrison; Clinton R. Paden; Haibin Wang; Jasmine Padilla; Jennifer Rakeman; Jing Zhang; Justin Lee; Krista Queen; Suxiang Tong; Yan Li; Ying Tao; Zachary Weiner                                                                                                                                                                                                                                                                                                                                                                                                                                                                                                                               |
| EPI_ISL_418200                                                                                                                              | NYU Langone Health                                                                                                                                                                                                  | Department of Pathology and Medicine, New York University School of Medicine                                               | Adriana Heguy; Amy Rapkiewicz; Antonio Serrano; Christian Marier; Dacia Dimartino; Emily Huang; Gael Westby; George Jour; Guomiao Shen; Jared Pinnell; John Cadley; John Chen; Margaret Black; Marie Samanovic-Golden; Mark J. Mulligan; Matija Snuderl; Matthew T. Maurano; Megan Hogan; Nick Vulpescu; Paolo Cotzia; Paul Zappile; Peter Meyn; Xiaojun Feng                                                                                                                                                                                                                                                                                                                                                                        |
| EPI_ISL_480042                                                                                                                              | Nagoya City Public Health Research Institute                                                                                                                                                                        | Pathogen Genomics Center, National Institute of Infectious Diseases                                                        | Hajime Kamiya; Kentaro Itokawa; Makoto Kuroda; Masanori Hashino; Motoi Suzuki; Rina Tanaka; Shinichiro Shibata; Takuya Miki; Tsuyoshi Sekizuka                                                                                                                                                                                                                                                                                                                                                                                                                                                                                                                                                                                       |
| EPI_ISL_435061,<br>EPI_ISL_435065                                                                                                           | National Centre for Disease control (NCDC), CSIR-Institute of Genomics and Integrative Biology (CSIR-IGIB)                                                                                                          | NCDC/CSIR-IGIB                                                                                                             | Aarti Tewari; Anurag Agrawal; Bharathram Uppili; Bibhash Nandi; Debasish Dash; Dharendra Kumar; Hema Gogia; Hemlata Lall; Himanshu Vashisht; Mahesh Dhar; Manju Bala; Meena Datta; Mitali Mukerji; Mohammed Faruq; Nidhi Saini; Nishu Tyagi; Partha Rakshit; Pooja Sharma; Poonam Gupta; Pramod Kumar; Prateek Singh; Preeti Madan; Priyanka Singh; Rajesh Pandey; Sandhya Kabra; Saruchi Wadhwa; Satyabrata Bag; Smriti Singh; Sujet Singh; Uma Sharma; Varun Jaiswal; Vivekanand A                                                                                                                                                                                                                                                 |
| EPI_ISL_420104                                                                                                                              | National Centre for Infectious Diseases                                                                                                                                                                             | Programme in Emerging Infectious Diseases, Duke-NUS Medical School                                                         | Barnaby E Young; Danielle E Anderson; David CB Lye; Gavin JD Smith; Jayanthi Jayakumar; Martin Linster; Yan Zhuang; Yee Sin Leo; Yvonne CF Su                                                                                                                                                                                                                                                                                                                                                                                                                                                                                                                                                                                        |
| EPI_ISL_416036                                                                                                                              | National Influenza Center - Instituto Adolfo Lutz                                                                                                                                                                   | Instituto Adolfo Lutz, Interdisciplinary Procedures Center, Strategic Laboratory                                           | Adriana Bugno; Adriano Abbud; Carlos Henrique Camargo; Claudia Regina Gonçalves; Claudio Tavares Sacchi; Daniela Bernardes Borges da Silva; Erica Valessa Ramos Gomes; Fabiana Cristina Pereira dos Santos; Maria do Carmo Sampaio Tavares Timenetsky; Simone Guadagnucci Morillo; Terezinha Maria de Paiva                                                                                                                                                                                                                                                                                                                                                                                                                          |
| EPI_ISL_498791                                                                                                                              | National Institute of Laboratory Medicine and Referral Center                                                                                                                                                       | Genomic Research Lab, BCSIR                                                                                                | A. K. M. Shamsuzzaman; Abu Sayeed Mohammad Mahmud; Asish Kumar Ghosh; Barna Goswami; Eshrar Osman; Iffat Jahan; Mahmuda Yeasmin; Md. Ahasan Habib; Md. Maruf Ahmed Molla; Md. Murshed Hasan Sarkar; Md. Saddam Hossain; Md. Salim Khan; Mohammad Samir Uzzaman; Salek Ahmed Sajib; Shahina Akter; Sheikh Md. Selim Al Din; Tanjina Akhter Banu; Tasnim Nafisa; Utpal Chandra Ray                                                                                                                                                                                                                                                                                                                                                     |
| EPI_ISL_541683,<br>EPI_ISL_541725                                                                                                           | National Institute of Virology, NIV Influenza                                                                                                                                                                       | National Institute of Virology, NIV Influenza                                                                              | Potdar V                                                                                                                                                                                                                                                                                                                                                                                                                                                                                                                                                                                                                                                                                                                             |
| EPI_ISL_512640                                                                                                                              | National Laboratory for Influenza/Virology reference laboratory, Public Health Center of the Ministry of Health of Ukraine                                                                                          | Respiratory Virus Unit, Microbiology Services Colindale, Public Health England                                             | Dr. Iryna Demchyshyna; PHE Covid Sequencing Team                                                                                                                                                                                                                                                                                                                                                                                                                                                                                                                                                                                                                                                                                     |
| EPI_ISL_644791                                                                                                                              | National Microbiology Reference Laboratory                                                                                                                                                                          | Quadram Institute Bioscience                                                                                               | Agnes Juru; Alexander Goredema; Ana-Victoria Gutierrez; Andrew J. Page; Andrew Tarupiva; Barbra Murwira; Beuty Makamure; Charles Nyaguye; David Baker; Gaetan Thilliez; Gemma Kay; Gibson Mhlanga; Hlanai Gumbo; Isaac Phiri; Justin O'Grady; Leonardo de Oliveira Martins; Muchaneta Mugabe; Portia Manangazira; Robert Kingsley; Sekesai Zinyowera; Tapfumaneni Mashe; Tatenda Takawira; Thanh Le Viet                                                                                                                                                                                                                                                                                                                             |
| EPI_ISL_435689,<br>EPI_ISL_443210,<br>EPI_ISL_574516                                                                                        | National Public Health Laboratory, National Centre for Infectious Diseases                                                                                                                                          | National Public Health Laboratory, National Centre for Infectious Diseases                                                 | Chavatte Jean-Marc; Cui Lin; Lin Cui; Lin Raymond Tzer Pin; Mak Tze Minn; Octavia Sophie; Raymond Tzer Pin Lin; Sophie Octavia; Tze Minn Mak; Zhenyang Zhou                                                                                                                                                                                                                                                                                                                                                                                                                                                                                                                                                                          |
| EPI_ISL_480297                                                                                                                              | National Reference Laboratory "Influenza and acute respiratory diseases"                                                                                                                                            | NRL-HIV                                                                                                                    | Ivailo Alexiev; Ivan Ivanov; Ivva Philipova                                                                                                                                                                                                                                                                                                                                                                                                                                                                                                                                                                                                                                                                                          |
| EPI_ISL_435677                                                                                                                              | National Virology Reference Laboratory                                                                                                                                                                              | National Public Health Laboratory, National Centre for Infectious Diseases                                                 | Chavatte Jean-Marc; Cui Lin; Lin Raymond Tzer Pin; Mak Tze Minn; Octavia Sophie; Taib Surita; Zaini Zainun                                                                                                                                                                                                                                                                                                                                                                                                                                                                                                                                                                                                                           |
| EPI_ISL_578309                                                                                                                              | National Virus Reference Laboratory                                                                                                                                                                                 | National Virus Reference Laboratory                                                                                        | Cillian F De Gascun; Gabriel Gonzalez; Jonathan Dean; Michael Carr; Suzie Coughlan                                                                                                                                                                                                                                                                                                                                                                                                                                                                                                                                                                                                                                                   |
| EPI_ISL_475232                                                                                                                              | Nebraska Public Health Laboratory                                                                                                                                                                                   | UNMC COVID-19 Response Team                                                                                                | UNMC COVID-19 Response Team                                                                                                                                                                                                                                                                                                                                                                                                                                                                                                                                                                                                                                                                                                          |
| EPI_ISL_515296,<br>EPI_ISL_515459                                                                                                           | Nevada State Public Health Laboratory                                                                                                                                                                               | Nevada State Public Health Laboratory                                                                                      | Andrew Gorzalski; Chris Laverdure; Cyprian Rossetto; David Jackson; Heather Kerwin; Joel R. Sevinsky; Natalie Crawford; Paul Hartley; Richard Tillett; Stephanie Van Hooser; Subhash C. Verma; and Mark Pandori                                                                                                                                                                                                                                                                                                                                                                                                                                                                                                                      |
| EPI_ISL_542086,<br>EPI_ISL_732747                                                                                                           | New Mexico Department of Health Scientific Laboratory                                                                                                                                                               | New Mexico Department of Health Scientific Laboratory                                                                      | Anastacia Griego-Fisher; D'Eldra Malone; Ellie Johnson                                                                                                                                                                                                                                                                                                                                                                                                                                                                                                                                                                                                                                                                               |
| EPI_ISL_527884                                                                                                                              | Nigeria Centre for Disease Control (NCDC)                                                                                                                                                                           | African Centre of Excellence for Genomics of Infectious Diseases (ACEGID), Redeemer's University, Ede, Osun State, Nigeria | Oluniyi P.E. et al                                                                                                                                                                                                                                                                                                                                                                                                                                                                                                                                                                                                                                                                                                                   |
| EPI_ISL_534241                                                                                                                              | Norra Alvsborgs länssjukhus                                                                                                                                                                                         | The Public Health Agency of Sweden                                                                                         | Anna Risberg; Anna-Malin Linde; Karin Tegmark-Wisell; Maria Lind Karlberg; Mattias Haukland; Mia Brytting; Olov Svartstrom; Oskar Karlsson Lindsjö; Petra Edquist; Reza Advani; Sandra Broddesson                                                                                                                                                                                                                                                                                                                                                                                                                                                                                                                                    |
| EPI_ISL_573313                                                                                                                              | Northumbria University / South Tees Hospitals NHS Foundation Trust / North Cumbria Integrated Care NHS Foundation Trust / North Tees and Hartlepool NHS Foundation Trust / Newcastle Hospitals NHS Foundation Trust | COVID-19 Genomics UK (COG-UK) Consortium                                                                                   | Andrew Nelson; Brendan Payne; Clive Graham; Darren L Smith; Debra Padgett; Edward Barton; Emma Swindells; Garren Scott; Gary Black; Gary Eltringham; Giles S Holt; Greg R Young; Jane Greenaway; Jennifer Collins; John Allan; Joshua Loh; Lynn Dover; Matthew Bashton; Mohammad A Tariq; Paul Baker; Sarah Essex; Steve Liggett; Wen C Yew; Yusri Taha                                                                                                                                                                                                                                                                                                                                                                              |
| EPI_ISL_626365,<br>EPI_ISL_626395                                                                                                           | Northwestern Memorial Hospital                                                                                                                                                                                      | Ozer Lab                                                                                                                   | Alan R. Hauser; Chad J. Achenbach; Chao Qi; Egon A. Ozer; Hannah H. Nam; Judd F. Hultquist; Lacy M. Simons; Lawrence J. Jennings; Michael G. Ison; Ramon Lorenzo-Redondo; Scott C. Roberts                                                                                                                                                                                                                                                                                                                                                                                                                                                                                                                                           |
| EPI_ISL_509203,<br>EPI_ISL_525885                                                                                                           | OHSU Lab Services Molecular Microbiology Lab                                                                                                                                                                        | Oregon SARS-CoV-2 Genome Sequencing Center                                                                                 | Alec J. Hirsch; Andrew C. Adey; Benjamin N. Bimber; Brendan L. O'Connell; Brian J. O'Roak; Daniel N. Streblow; Guang Fan; Ruth V. Nichols; Sally B. Grindstaff; William B. Messer                                                                                                                                                                                                                                                                                                                                                                                                                                                                                                                                                    |
| EPI_ISL_480119                                                                                                                              | Oita Prefectural Institute of Public Health and Environmental Science                                                                                                                                               | Pathogen Genomics Center, National Institute of Infectious Diseases                                                        | Hajime Kamiya; Kentaro Itokawa; Makoto Kuroda; Mari Sasaki; Masanori Hashino; Motoi Suzuki; Rina Tanaka; Tsuyoshi Sekizuka                                                                                                                                                                                                                                                                                                                                                                                                                                                                                                                                                                                                           |
| EPI_ISL_457974,<br>EPI_ISL_457988,<br>EPI_ISL_457989                                                                                        | Oman-NIC                                                                                                                                                                                                            | Oman-NIC                                                                                                                   | Abdulla Balkhair; Ahlam Al-Amri; Aisha Al-Amri; Aisha Al-Busaidi; Amina Al Jardani; Fahad Zadjali; Fatma BaAlawi; Hamida AL Barwani; Hanan Al-Kindi; Intisar Al-Shukri; Khulood Al-Mammary; Mohammed Al-Tobi; Samiha Al Kharusi; Samira Al-Maruqi; Zeyana AL-Dahmani                                                                                                                                                                                                                                                                                                                                                                                                                                                                 |
| EPI_ISL_491155                                                                                                                              | Oman-National Influenza Center                                                                                                                                                                                      | Biotechnology & OMICs Laboratory                                                                                           | Abdul Latif Khan; Adil Al-Wahaib; Adil Khan; Ahlam Al-Amri; Ahmed Al-Harrasi; Ahmed Al-Rawahi; Aisha Al-Amri; Aisha Al-Busaidi; Amina Al-Jardani; Hanan Al-Kindi; Intisar Al-Shukri; Sajjad Asaf; Samiha Al-Kharusi; Samira Al-Mahruqi; Seif Al-Abri.                                                                                                                                                                                                                                                                                                                                                                                                                                                                                |
| EPI_ISL_569735,                                                                                                                             | Omsk Research Institute of Natural Focal                                                                                                                                                                            | WHO National Influenza Centre Russian Federation                                                                           | Aleksei Vasilenko; Andrey Komissarov; Artem Fadeev; Daria Nashatyreva; Ekaterina Gradoboeva; Ekaterina Savkina; Elena Poleshchuk; Valery Yakimenko                                                                                                                                                                                                                                                                                                                                                                                                                                                                                                                                                                                   |

|                                                                                                                                                                                                                                                                                                                                                                                                                                                                                                                                                                                                                                                  |                                                                                                                                                                                            |                                                                                                                                                                               |                                                                                                                                                                                                                                                                                                                                                                                                                                                             |
|--------------------------------------------------------------------------------------------------------------------------------------------------------------------------------------------------------------------------------------------------------------------------------------------------------------------------------------------------------------------------------------------------------------------------------------------------------------------------------------------------------------------------------------------------------------------------------------------------------------------------------------------------|--------------------------------------------------------------------------------------------------------------------------------------------------------------------------------------------|-------------------------------------------------------------------------------------------------------------------------------------------------------------------------------|-------------------------------------------------------------------------------------------------------------------------------------------------------------------------------------------------------------------------------------------------------------------------------------------------------------------------------------------------------------------------------------------------------------------------------------------------------------|
| EPI_ISL_569738, EPI_ISL_569742                                                                                                                                                                                                                                                                                                                                                                                                                                                                                                                                                                                                                   | Infections                                                                                                                                                                                 |                                                                                                                                                                               |                                                                                                                                                                                                                                                                                                                                                                                                                                                             |
| EPI_ISL_486123, EPI_ISL_486139                                                                                                                                                                                                                                                                                                                                                                                                                                                                                                                                                                                                                   | Orange County Public Health Laboratory                                                                                                                                                     | Chan-Zuckerberg Biohub                                                                                                                                                        | CZB Cliahub Consortium                                                                                                                                                                                                                                                                                                                                                                                                                                      |
| EPI_ISL_475129                                                                                                                                                                                                                                                                                                                                                                                                                                                                                                                                                                                                                                   | Orebro klinisk mikrobiologi                                                                                                                                                                | The Public Health Agency of Sweden                                                                                                                                            | Anna Risberg; Anna-Malin Linde; Karin Tegmark-Wiseli; Maria Lind Karlberg; Mattias Haukland; Olov Svartstrom; Oskar Karlsson Lindsjo; Petra Edquist; Reza Advani; Sandra Broddesson; Shamam Muradrasoli                                                                                                                                                                                                                                                     |
| EPI_ISL_549128                                                                                                                                                                                                                                                                                                                                                                                                                                                                                                                                                                                                                                   | Ostfold Hospital Trust - Kalnes, Centre for Laboratory Medicine, Section for gene technology and infection serology                                                                        | Norwegian Institute of Public Health, Department of Virology                                                                                                                  | Hilde Elshaug; Hilde Synnøve Vollan; Kamilla Heddeland Instefjord; Karoline Bragstad; Kathrine Stene-Johansen; Olav Hungnes; Rasmus Riis Kopperud                                                                                                                                                                                                                                                                                                           |
| EPI_ISL_478763, EPI_ISL_478960, EPI_ISL_534986, EPI_ISL_549450, EPI_ISL_560053, EPI_ISL_572850, EPI_ISL_573009, EPI_ISL_576573                                                                                                                                                                                                                                                                                                                                                                                                                                                                                                                   |                                                                                                                                                                                            |                                                                                                                                                                               |                                                                                                                                                                                                                                                                                                                                                                                                                                                             |
| see above                                                                                                                                                                                                                                                                                                                                                                                                                                                                                                                                                                                                                                        | Oxford Viroemics, NDM, University of Oxford; Oxford University Hospitals; Basingstoke and North Hampshire Hospital                                                                         | COVID-19 Genomics UK (COG-UK) Consortium                                                                                                                                      | Alex Mobbs; Amy Trebes; Anita Justice; Catrin Moore; Christophe Fraser; David Bonsall; David Buck; Emma Wise; George Macintyre; Jessica Lynch; John Todd; Mariateresa de Cesare; Matilde Mori; Monique Andersson; Nathan Moore; Nick Cortes; Robert Shaw; Stephen Kidd; Tanya Golubchik; Timothy Peto                                                                                                                                                       |
| EPI_ISL_439979, EPI_ISL_440218, EPI_ISL_440738, EPI_ISL_442694, EPI_ISL_442736, EPI_ISL_443943, EPI_ISL_488328, EPI_ISL_488341, EPI_ISL_488359, EPI_ISL_492575                                                                                                                                                                                                                                                                                                                                                                                                                                                                                   |                                                                                                                                                                                            |                                                                                                                                                                               |                                                                                                                                                                                                                                                                                                                                                                                                                                                             |
| see above                                                                                                                                                                                                                                                                                                                                                                                                                                                                                                                                                                                                                                        | PHE South West Regional Laboratory, National Infection Service                                                                                                                             | Wellcome Sanger Institute for the COVID-19 Genomics UK (COG-UK) consortium                                                                                                    | Alex Alderton; Barry Vipond; Cordelia Langford; David K. Jackson; Dominic Kwiatkowski; Dr Peter Muir; Ewan Harrison; Hannah Pymont; Ian Johnston; John Sillitoe on behalf of the Wellcome Sanger Institute COVID-19 Surveillance Team (http://www.sanger.ac.uk/covid-team); Rich Hopes; Roberto Amato; Sonia Goncalves; Stephanie Hutchings; and Alex Alderton                                                                                              |
| EPI_ISL_605826                                                                                                                                                                                                                                                                                                                                                                                                                                                                                                                                                                                                                                   | PathWest Laboratory Medicine WA                                                                                                                                                            | PathWest Laboratory Medicine WA Microbial Surveillance Unit                                                                                                                   | PathWest Laboratory Medicine WA Microbial Surveillance Unit                                                                                                                                                                                                                                                                                                                                                                                                 |
| EPI_ISL_513182, EPI_ISL_513235, EPI_ISL_678029, EPI_ISL_678037, EPI_ISL_678134, EPI_ISL_678195, EPI_ISL_751237                                                                                                                                                                                                                                                                                                                                                                                                                                                                                                                                   |                                                                                                                                                                                            |                                                                                                                                                                               |                                                                                                                                                                                                                                                                                                                                                                                                                                                             |
| see above                                                                                                                                                                                                                                                                                                                                                                                                                                                                                                                                                                                                                                        | Pathogen Genomics Lab King Abdullah University of Science and Technology(KAUST)                                                                                                            | Pathogen Genomics Lab King Abdullah University of Science and Technology(KAUST)                                                                                               | Abbas Al Mutairi; Abdulaziz Alahmadi; Afrah Alsomali; Amanda Ooi; Amit Kumar Subudhi; Anwar Hashem; Arnab Pain; Asim Khogeer; Awad A-Omari; Fadwa Alofi; Fathia Ben Rached; Jumana Taha; Kahled Alghithami; Luke Esau; Naif Almontashiri; Nashwa Al-khotani; Olga Douvropoulou; Raece Naehm; Rahul P Salunke; Raushan Nugmanova; Samer Salih; Sara Mfarrej; Sharif Hala                                                                                     |
| EPI_ISL_747242                                                                                                                                                                                                                                                                                                                                                                                                                                                                                                                                                                                                                                   | Pathogen Lab (BSL3), Biomedical Innovation Department, Applied and Experimental Biology Division, Scientific Research Center and High Education from Enseñada (CICESE)                     | Pathogen Laboratory (BSL3), Biomedical Innovation Department, Experimental and Applied Biology Division, Scientific Research Center and High Education from Enseñada (CICESE) | Cervantes-Luevano K; Galindo C and Licea-Navarro A; Martinez M; Saavedra A                                                                                                                                                                                                                                                                                                                                                                                  |
| EPI_ISL_574487                                                                                                                                                                                                                                                                                                                                                                                                                                                                                                                                                                                                                                   | Programme in Emerging Infectious Diseases, Duke-NUS Medical School                                                                                                                         | National Public Health Laboratory, National Centre for Infectious Diseases                                                                                                    | Adrian Eng Zheng Kang; Danielle E Anderson; Lin Cui; Raymond Tzer Pin Lin; Sophie Octavia; Tze Minn Mak; Zhenyang Zhou                                                                                                                                                                                                                                                                                                                                      |
| EPI_ISL_482296, EPI_ISL_482362, EPI_ISL_482451, EPI_ISL_482455                                                                                                                                                                                                                                                                                                                                                                                                                                                                                                                                                                                   | Providence St. Joseph Health Molecular Genomics Laboratory                                                                                                                                 | Providence St. Joseph Health Molecular Genomics Laboratory                                                                                                                    | Alexa K Dowdell; Brian D Piening; Carlo B Bifulco; Fred L Robinson; Mary Campbell                                                                                                                                                                                                                                                                                                                                                                           |
| EPI_ISL_448293                                                                                                                                                                                                                                                                                                                                                                                                                                                                                                                                                                                                                                   | Quadram Institute Bioscience                                                                                                                                                               | COVID-19 Genomics UK (COG-UK) Consortium                                                                                                                                      | Alexander J Trotter; Alison E. Mather; Alp Aydin; Ana P. Tedim; Anastasia Kolyva; Andrew Bell; Andrew J. Page; Claire Stuart; Dave J. Baker; Gemma L. Kay; John Wain; Justin O'Grady; Leonardo de Oliveira Martins; Lizzie Meadows; Maria Diaz; Mark Webber; Muhammed Yasir; Nabil-Fareed Alikhan; Ngozi Elumogo; Nicholas M. Thomson; Rachael Stanley; Rachel Gilroy; Reenesha Prakash; Samir Dervisevic; Samuel Bloomfield; Steven Rudder; Thanh Le-Viet  |
| EPI_ISL_425480, EPI_ISL_432900, EPI_ISL_432921, EPI_ISL_441892, EPI_ISL_448406, EPI_ISL_448414, EPI_ISL_453638, EPI_ISL_461931, EPI_ISL_472404                                                                                                                                                                                                                                                                                                                                                                                                                                                                                                   |                                                                                                                                                                                            |                                                                                                                                                                               |                                                                                                                                                                                                                                                                                                                                                                                                                                                             |
| see above                                                                                                                                                                                                                                                                                                                                                                                                                                                                                                                                                                                                                                        | Queens Medical Centre, Clinical Microbiology Department / DeepSeq Nottingham                                                                                                               | COVID-19 Genomics UK (COG-UK) Consortium                                                                                                                                      | Christopher Moore; Fel Sang; Gemma Clark; Hannah Howson-Wells; Johnny Debebe; Jonathan Ball; Joseph Chappell; Manjinder Khakh; Matthew Carlisle; Matthew Loose; Michelle M Lister; Nadine Holmes; Patrick McClure; Theodoros Tsoleridis; Vicki M Fleming; Victoria Wright; Wendy Smith                                                                                                                                                                      |
| EPI_ISL_467902, EPI_ISL_467906, EPI_ISL_467925, EPI_ISL_494543, EPI_ISL_498728, EPI_ISL_571017, EPI_ISL_571160, EPI_ISL_571354, EPI_ISL_571913, EPI_ISL_571981, EPI_ISL_572139, EPI_ISL_572150, EPI_ISL_572166, EPI_ISL_603938, EPI_ISL_604242, EPI_ISL_604284, EPI_ISL_604297, EPI_ISL_604337, EPI_ISL_604380, EPI_ISL_604546, EPI_ISL_604615, EPI_ISL_604709, EPI_ISL_604762, EPI_ISL_604962, EPI_ISL_604974                                                                                                                                                                                                                                   |                                                                                                                                                                                            |                                                                                                                                                                               |                                                                                                                                                                                                                                                                                                                                                                                                                                                             |
| see above                                                                                                                                                                                                                                                                                                                                                                                                                                                                                                                                                                                                                                        | Quest Diagnostics                                                                                                                                                                          | Quest Diagnostics                                                                                                                                                             | Anderson; Anderson, B.; B.P.; D.F.; Gerasimova, A.; Grover, D.; Hua, M.; K.E.; Kagan; Lacbawan, F.; Liu Y.; Livingston; Owen, R.; R.M.; R.M. and Owen, R.; Rosenthal; S.H.; Shalhout                                                                                                                                                                                                                                                                        |
| EPI_ISL_455751                                                                                                                                                                                                                                                                                                                                                                                                                                                                                                                                                                                                                                   | REGIONAL VRDL/ICMR-RMRC BBSR                                                                                                                                                               | Immunogenomics lab, Institute of Life Sciences, Bhubaneswar                                                                                                                   | Ajay Parida; Arup Ghosh; Atimukta Jha; COVID-19 team of ILS & RMRC; DBT's PAN-INDIA 1000 SARS-CoV2 RNA genome sequencing consortium; Debduitta Bhattacharya; Ghulam Hussain Syed; Jaya Singh Khastri; Jyotirmayee Turuk; Manasi Priyadarshini; Orissa COVID-19 study group; Punit Prasad; Rajeeb Swain; Rupesh Dash; Sanghamitra Pati; Shanti Senapati; Shuchi Smita; Soma Chattopadhyay; Sunil Raghav; Swati Madhulika; Tushar K. Beuria; Viplov K. Biswas |
| EPI_ISL_426435                                                                                                                                                                                                                                                                                                                                                                                                                                                                                                                                                                                                                                   | RI State Health Laboratories                                                                                                                                                               | Pathogen Discovery, Respiratory Viruses Branch, Division of Viral Diseases, Centers for Disease Control and Prevention                                                        | Alison S. Laufer Halpin; Anna Uehara; Christopher A. Elkins; Clinton R. Paden; Halbin Wang; Jing Zhang; Krista Queen; Mary S. Keckler; Rachel Marine; Suxiang Tong; Yan Li; Ying Tao                                                                                                                                                                                                                                                                        |
| EPI_ISL_759965                                                                                                                                                                                                                                                                                                                                                                                                                                                                                                                                                                                                                                   | RSUD Dr. Soetomo                                                                                                                                                                           | Institute of Tropical Disease, Universitas Airlangga                                                                                                                          | Aldise M Nastri; Gatot Soegiarto; Jezzy R Dewantari; Joni Wahyuhadi; Kazufumi Shimizu; Krisnoadi Rahardjo; Laksmi Wulandari; Maria I Lusida; Resti Yudhawati; Rima R Prasetya; Soetjipto; Yasuko Mori                                                                                                                                                                                                                                                       |
| EPI_ISL_441379, EPI_ISL_585236                                                                                                                                                                                                                                                                                                                                                                                                                                                                                                                                                                                                                   | Regional Virus Laboratory, Belfast Health and Social Care Trust                                                                                                                            | COVID-19 Genomics UK (COG-UK) Consortium                                                                                                                                      | Alison Watt; Ciara Cox; Conall McCaughey; David Simpson; Derek Fairley; James McKenna; Mairead Connor; Susan Feeney; Tanya Curran; Zoltan Molnar                                                                                                                                                                                                                                                                                                            |
| EPI_ISL_459389, EPI_ISL_469864, EPI_ISL_489248, EPI_ISL_489327                                                                                                                                                                                                                                                                                                                                                                                                                                                                                                                                                                                   | Regional Virus Laboratory, Belfast Health and Social Care Trust                                                                                                                            | Wellcome Sanger Institute for the COVID-19 Genomics UK (COG-UK) consortium                                                                                                    | Alison Watt; Ciara Cox; Conall McCaughey; Cordelia Langford; David K. Jackson; David Simpson; Derek Fairley; Dominic Kwiatkowski; Ewan Harrison; Ian Johnston; James McKenna; John Sillitoe on behalf of the Wellcome Sanger Institute COVID-19 Surveillance Team (http://www.sanger.ac.uk/covid-team); Mairead Connor; Roberto Amato; Sonia Goncalves; Susan Feeney; Tanya Curran; Zoltan Molnar; and Alex Alderton                                        |
| EPI_ISL_686598                                                                                                                                                                                                                                                                                                                                                                                                                                                                                                                                                                                                                                   | Respiratory Virus Unit, Microbiology Services Colindale, Public Health England                                                                                                             | COVID-19 Genomics UK (COG-UK) Consortium                                                                                                                                      | PHE Covid Sequencing Team                                                                                                                                                                                                                                                                                                                                                                                                                                   |
| EPI_ISL_412116, EPI_ISL_415144, EPI_ISL_417215, EPI_ISL_417246, EPI_ISL_417296, EPI_ISL_418668, EPI_ISL_421783, EPI_ISL_421807, EPI_ISL_421953, EPI_ISL_423383, EPI_ISL_459960, EPI_ISL_464302, EPI_ISL_464416, EPI_ISL_464549, EPI_ISL_464563, EPI_ISL_464741, EPI_ISL_464771, EPI_ISL_464779, EPI_ISL_464839, EPI_ISL_464954, EPI_ISL_465436, EPI_ISL_465991, EPI_ISL_466076, EPI_ISL_466120, EPI_ISL_466615, EPI_ISL_566064                                                                                                                                                                                                                   |                                                                                                                                                                                            |                                                                                                                                                                               |                                                                                                                                                                                                                                                                                                                                                                                                                                                             |
| see above                                                                                                                                                                                                                                                                                                                                                                                                                                                                                                                                                                                                                                        | Respiratory Virus Unit, Microbiology Services Colindale, Public Health England                                                                                                             | Respiratory Virus Unit, Microbiology Services Colindale, Public Health England                                                                                                | Angie Lackenby; Joanna Ellis; Jonathan Hubb; Kirstin Edwards; Leena Bhaw; Maria Zambon; Monica Galiano; Omolola Akinbami; PHE Covid Sequencing Team; Richard Myers; Shahjahan Miah; Steven Platt; Tiina Talts; Tina Talts                                                                                                                                                                                                                                   |
| EPI_ISL_511332                                                                                                                                                                                                                                                                                                                                                                                                                                                                                                                                                                                                                                   | SYNLAB                                                                                                                                                                                     | Instituto Nacional de Saude (INSA)                                                                                                                                            | Borges et al                                                                                                                                                                                                                                                                                                                                                                                                                                                |
| EPI_ISL_511214, EPI_ISL_511217                                                                                                                                                                                                                                                                                                                                                                                                                                                                                                                                                                                                                   | SYNLAB                                                                                                                                                                                     | Instituto Nacional de Saude (INSA) and Instituto Gulbenkian de Ciencia (IGC)                                                                                                  | Borges et al                                                                                                                                                                                                                                                                                                                                                                                                                                                |
| EPI_ISL_479933                                                                                                                                                                                                                                                                                                                                                                                                                                                                                                                                                                                                                                   | Saitama Prefectural Institute of Public Health                                                                                                                                             | Pathogen Genomics Center, National Institute of Infectious Diseases                                                                                                           | Hajime Kamiya; Hayato Ehara; Kentaro Itokawa; Makoto Kuroda; Masanori Hashino; Motoi Suzuki; Rina Tanaka; Tsuyoshi Sekizuka                                                                                                                                                                                                                                                                                                                                 |
| EPI_ISL_467961, EPI_ISL_494714, EPI_ISL_494727, EPI_ISL_636125, EPI_ISL_878212, EPI_ISL_878226, EPI_ISL_878300, EPI_ISL_878367, EPI_ISL_878375, EPI_ISL_878390, EPI_ISL_878400, EPI_ISL_878401, EPI_ISL_878404, EPI_ISL_878407, EPI_ISL_878437, EPI_ISL_879950, EPI_ISL_879977                                                                                                                                                                                                                                                                                                                                                                   |                                                                                                                                                                                            |                                                                                                                                                                               |                                                                                                                                                                                                                                                                                                                                                                                                                                                             |
| see above                                                                                                                                                                                                                                                                                                                                                                                                                                                                                                                                                                                                                                        | San Diego County Public Health Laboratory                                                                                                                                                  | Andersen lab at Scripps Research                                                                                                                                              | Brett Austin; Jovan Shephard; SEARCH Alliance San Diego with Tracy Basler                                                                                                                                                                                                                                                                                                                                                                                   |
| EPI_ISL_486300                                                                                                                                                                                                                                                                                                                                                                                                                                                                                                                                                                                                                                   | San Joaquin County Public Health Lab                                                                                                                                                       | Chan-Zuckerberg Biohub                                                                                                                                                        | CZB Cliahub Consortium                                                                                                                                                                                                                                                                                                                                                                                                                                      |
| EPI_ISL_542282, EPI_ISL_542285, EPI_ISL_542321                                                                                                                                                                                                                                                                                                                                                                                                                                                                                                                                                                                                   | San Matteo Hospital Pavia                                                                                                                                                                  | Dep. Of Oncology and Hemato-Oncology University of Milan                                                                                                                      | Antonio Piralla; Carlo Federico Perno; Chiara Vismara; Claudia Alteri; Elisa Matarazzo; Fausto Baldanti; Federica Giardina; Federica Novazzi; Luna Colagrossi; Maria Antonello; Massimo Puoti; Monica Tallarita; Oscar Massimiliano Epis; Roberto Fumagalli; Silvia Renica; Stefano Gaiarsa; Valentino Costabile; Valeria Cento                                                                                                                             |
| EPI_ISL_435583                                                                                                                                                                                                                                                                                                                                                                                                                                                                                                                                                                                                                                   | Santa Clara County Public Health Department                                                                                                                                                | Chiu Laboratory, University of California, San Francisco                                                                                                                      | Brandon Bonin; Debra A. Wadford; Elsa Villarino; Scot Federman; Wei Gu; Xianding Deng; and Charles Y. Chiu                                                                                                                                                                                                                                                                                                                                                  |
| EPI_ISL_479800                                                                                                                                                                                                                                                                                                                                                                                                                                                                                                                                                                                                                                   | Sapporo City Institute of Public Health                                                                                                                                                    | Pathogen Genomics Center, National Institute of Infectious Diseases                                                                                                           | Asami Ohnishi; Hajime Kamiya; Kentaro Itokawa; Makoto Kuroda; Masanori Hashino; Motoi Suzuki; Rina Tanaka; Tsuyoshi Sekizuka                                                                                                                                                                                                                                                                                                                                |
| EPI_ISL_676592                                                                                                                                                                                                                                                                                                                                                                                                                                                                                                                                                                                                                                   | Scientific Veterinary Institute Novi Sad                                                                                                                                                   | Veterinary Specialized Institute "Kraljevo", Serbia                                                                                                                           | Afonso, C.; Banovic Djeri, B.; Jankovic, M.; Jovanovic, T.; Knezevic, A.; Petrovic, T.; Sekler, M.; Tesovic, B.; Vidanovic, D.; Volkening, J.                                                                                                                                                                                                                                                                                                               |
| EPI_ISL_437561, EPI_ISL_437575                                                                                                                                                                                                                                                                                                                                                                                                                                                                                                                                                                                                                   | Scripps Medical Laboratory                                                                                                                                                                 | Andersen lab at Scripps Research                                                                                                                                              | Ellen Stefanski; Ian Mchardy; SEARCH Alliance San Diego with Michael Quigley                                                                                                                                                                                                                                                                                                                                                                                |
| EPI_ISL_430128                                                                                                                                                                                                                                                                                                                                                                                                                                                                                                                                                                                                                                   | Seattle Flu Study                                                                                                                                                                          | Seattle Flu Study                                                                                                                                                             | Chu et al                                                                                                                                                                                                                                                                                                                                                                                                                                                   |
| EPI_ISL_471542                                                                                                                                                                                                                                                                                                                                                                                                                                                                                                                                                                                                                                   | Secretaria de Saude de Mogi das Cruzes                                                                                                                                                     | Instituto Adolfo Lutz, Interdisciplinary Procedures Center, Strategic Laboratory                                                                                              | Claudia Regina Gonçalves; Claudio Tavares Sacchi; Erica Valessa Ramos Gomes                                                                                                                                                                                                                                                                                                                                                                                 |
| EPI_ISL_469284                                                                                                                                                                                                                                                                                                                                                                                                                                                                                                                                                                                                                                   | Service de Virologie Hôpital Saint-Louis                                                                                                                                                   | Laboratory Cell Biology of Viral Infection-INSERM unit 944                                                                                                                    | Ali Amara; Constance Delaunerie; Laurent Meertens; Lucie Bonnet-Madin; Maud SALMONA; Séverine Mercier-Delarue                                                                                                                                                                                                                                                                                                                                               |
| EPI_ISL_538151                                                                                                                                                                                                                                                                                                                                                                                                                                                                                                                                                                                                                                   | Servicio de Microbiología y Parasitología clínica. UCEIMP. Hospital Universitario Virgen del Rocío/IBIS/CSIC/US                                                                            | SeqCOVID-SPAIN consortium/IBV(CSIC)                                                                                                                                           | Guillermo Martín Gutiérrez; Javier Aznar Martín and SeqCOVID-SPAIN consortium; Lidia Gálvez Benítez; Verónica González Galán; Ángel Rodríguez Villodres                                                                                                                                                                                                                                                                                                     |
| EPI_ISL_660288                                                                                                                                                                                                                                                                                                                                                                                                                                                                                                                                                                                                                                   | Servicio de Microbiología, Laboratori Clínic Metropolitana Nord. Hospital Universitari Germans Trias i Pujol. Institut d'Investigació en Ciències de la Salut Germans Trias i Pujol (IGTP) | SeqCOVID-SPAIN consortium/IBV(CSIC)                                                                                                                                           | Adrián Antuori; Anabel Fernández; Anna Not; Antoni E. Bordoy; Elisa Martíro; Nona Romaní and SeqCOVID-SPAIN consortium                                                                                                                                                                                                                                                                                                                                      |
| EPI_ISL_636113, EPI_ISL_636114, EPI_ISL_636115, EPI_ISL_636116, EPI_ISL_636117, EPI_ISL_636118, EPI_ISL_636119, EPI_ISL_636120, EPI_ISL_730127, EPI_ISL_730128, EPI_ISL_730129, EPI_ISL_730130, EPI_ISL_730131, EPI_ISL_730132, EPI_ISL_730133, EPI_ISL_730134, EPI_ISL_730135, EPI_ISL_730136, EPI_ISL_962662, EPI_ISL_962663, EPI_ISL_1081416, EPI_ISL_1081506, EPI_ISL_1081544, EPI_ISL_1185929, EPI_ISL_1185931, EPI_ISL_1185934, EPI_ISL_1185935, EPI_ISL_1185936, EPI_ISL_1295671, EPI_ISL_1295676, EPI_ISL_1295691, EPI_ISL_1295730, EPI_ISL_1295760, EPI_ISL_1295779, EPI_ISL_1295837, EPI_ISL_1295843, EPI_ISL_1366325, EPI_ISL_1794925 |                                                                                                                                                                                            |                                                                                                                                                                               |                                                                                                                                                                                                                                                                                                                                                                                                                                                             |
| see above                                                                                                                                                                                                                                                                                                                                                                                                                                                                                                                                                                                                                                        | Sharp HealthCare Laboratory                                                                                                                                                                | Andersen lab at Scripps Research                                                                                                                                              | Art Mendoza; Cathy Woerle; Jacquelyn Berumen; Liam McGinnis; Omid Bakhtar; SEARCH Alliance San Diego with Aaron Harding                                                                                                                                                                                                                                                                                                                                     |
| EPI_ISL_582662                                                                                                                                                                                                                                                                                                                                                                                                                                                                                                                                                                                                                                   | Sheikh Khalifa Medical City                                                                                                                                                                | Molecular/Surveillance lab Sheikh Khalifa Medical City                                                                                                                        | Amirtharaj Francis; Hala Imambaccus; Hiba Saud; Sahar Almarzooqi; Sajeed Abdul; Stefan Weber                                                                                                                                                                                                                                                                                                                                                                |

|                                                                                                                                                                |                                                                                                  |                                                                                                                                    |                                                                                                                                                                                                                                                                                                                                                                                                                                                                                                                                                                                                                                                                                                                                                                                            |
|----------------------------------------------------------------------------------------------------------------------------------------------------------------|--------------------------------------------------------------------------------------------------|------------------------------------------------------------------------------------------------------------------------------------|--------------------------------------------------------------------------------------------------------------------------------------------------------------------------------------------------------------------------------------------------------------------------------------------------------------------------------------------------------------------------------------------------------------------------------------------------------------------------------------------------------------------------------------------------------------------------------------------------------------------------------------------------------------------------------------------------------------------------------------------------------------------------------------------|
| EPI_ISL_696265                                                                                                                                                 | Sonora Quest Laboratories, Laboratory Sciences of Arizona                                        | TGen North                                                                                                                         | Ashlyn Pfeiffer; Chris French; Darrin Lemmer; Dave Engelthaler; Hayley Yaglom; Jolene Bowers; Megan Folkerts; The Arizona COVID Genomics Union (ACGU)                                                                                                                                                                                                                                                                                                                                                                                                                                                                                                                                                                                                                                      |
| EPI_ISL_469241                                                                                                                                                 | Special Infectious Agents Unit                                                                   | Special Infectious Agents Unit                                                                                                     | A.M.; Al-Sobahi; Azhar; E.I.; El-Kafrawy; Farraj; Hassan; N.A.; S.A.; T.L.; Tolah; Uthman                                                                                                                                                                                                                                                                                                                                                                                                                                                                                                                                                                                                                                                                                                  |
| EPI_ISL_752646                                                                                                                                                 | State Laboratories Division, Hawaii State Department of Health                                   | State Laboratories Division, Hawaii State Department of Health                                                                     | Drew Kuwazaki; Edward Desmond; Pamela O'Brien; Razvan Sultana; Sabrina Diemert                                                                                                                                                                                                                                                                                                                                                                                                                                                                                                                                                                                                                                                                                                             |
| EPI_ISL_447587                                                                                                                                                 | Tamil Nadu Veterinary and Animal Sciences University                                             | CSIR-Centre for Cellular and Molecular Biology                                                                                     | Archana Bharadwaj Siva; Dhiviya Vedagiri; Divya Gupta; Divya Tej Sowpatti; G Dhinakar Raj; G Ravi Kumar; K Kaveri; Karthik Bharadwaj Tallapaka; Krishnan Harinivas Harshan; Kumarasamy Thangaraj; Lamuk Zaveri; Namami Gaur; P Padmapriya; Payel Mukherjee; Priya Singh; Purushotham Vodnala; R Kiruba; Rakesh K Mishra; S Magesh; S Sivasubramanian; S Vennila; Sakshi Shambhavi; Santosh Kumar Kuncha; Shagufta Khan; Sofia Banu; Tulasi Nagabandi; Vishal Sah                                                                                                                                                                                                                                                                                                                           |
| EPI_ISL_452112                                                                                                                                                 | Texas DSHS Lab Services                                                                          | Pathogen Discovery, Respiratory Viruses Branch, Division of Viral Diseases, Centers for Disease Control and Prevention             | Alison S. Laufer Halpin; Anna Montmayeur; Anna Uehara; Christopher A. Elkins; Clinton R. Paden; Haibin Wang; Jing Zhang; Krista Queen; Mary S. Keckler; Rachel Marine; Suxiang Tong; Yan Li; Ying Tao; Zachary Weiner                                                                                                                                                                                                                                                                                                                                                                                                                                                                                                                                                                      |
| EPI_ISL_672172, EPI_ISL_672264                                                                                                                                 | The Ashley Laboratory, Stanford University                                                       | Chan-Zuckerberg Biohub                                                                                                             | CZB Cliahub Consortium                                                                                                                                                                                                                                                                                                                                                                                                                                                                                                                                                                                                                                                                                                                                                                     |
| EPI_ISL_577633, EPI_ISL_626573                                                                                                                                 | The National Institute of Public Health                                                          | State Veterinary Institute Prague                                                                                                  | A; D; H; J; Jirincova; L; Nagy; Novakova; Trnka; Vecerova                                                                                                                                                                                                                                                                                                                                                                                                                                                                                                                                                                                                                                                                                                                                  |
| EPI_ISL_491093                                                                                                                                                 | The National Institute of Public Health                                                          | The National Institute of Public Health and State Veterinary Institute Prague                                                      | A; D; H; J; Jirincova; L; Nagy; Novakova; Trnka; Vecerova                                                                                                                                                                                                                                                                                                                                                                                                                                                                                                                                                                                                                                                                                                                                  |
| EPI_ISL_417551, EPI_ISL_417648, EPI_ISL_417682, EPI_ISL_417686, EPI_ISL_417755, EPI_ISL_417757                                                                 | The National University Hospital of Iceland                                                      | deCODE genetics                                                                                                                    | Agnar Helgason; Alma Moller; Arna B Agustsdottir; Arnaldur Gylfason; Asgeir Sigurdsson; Aslaug Jonasdottir; Berglind Eiriksdoottir; Bjarni Thorbjornsson; Brynjar O Jenson; Daniel F Gudbjartsson; Droplaug N Magnusdottir; Elisabet E Gardarsdottir; Emil A Thorarensen; Gardar Sveinbjornsson; Gisli Masson; Gudmundur Georgsson; Gudmundur L Norddahl; Gudrun Sigmundsdottir; Hakon Jonsson; Hilma Holm; Ingileif Jonsdottir; Jona Saemundsdottir; Kamilla S Josefsdottir; Kari Stefansson; Karl G Kristinnson; Kjartan R Gudmundsson; Kristin E Sveinsdottir; Louise le Roux; Maney Sveinsdottir; Olafia S Gretarsdottir; Olafur T Magnussun; Pali Melsted; Patrick Sulem; Run Fridriksdottir; Thora R Gunnarsdottir; Thordur Kristjansson; Thorolfur Gudnason; Unnur Thorsteinsdottir |
| EPI_ISL_479894                                                                                                                                                 | Tokyo Metropolitan Institute of Public Health                                                    | Pathogen Genomics Center, National Institute of Infectious Diseases                                                                | Hajime Kamiya; Kenji Sadamasu; Kentaro Itokawa; Makoto Kuroda; Mami Nagashima; Masanori Hashino; Motoi Suzuki; Rina Tanaka; Takashi Chiba; Tsuyoshi Sekizuka                                                                                                                                                                                                                                                                                                                                                                                                                                                                                                                                                                                                                               |
| EPI_ISL_463970, EPI_ISL_586299, EPI_ISL_586325, EPI_ISL_755867                                                                                                 | Toronto Invasive Bacterial Diseases Network                                                      | McMaster University                                                                                                                | Ahmed Draia; Allison McGeer; Andrew G. McArthur; Angel Li; Emily Panousis; Hooman Derakhshani; Jalees Nasir; Kuganya Nirmalarajah; Michael Surette; Patryk Aftanas; Samira Mubareka                                                                                                                                                                                                                                                                                                                                                                                                                                                                                                                                                                                                        |
| EPI_ISL_483194, EPI_ISL_483253, EPI_ISL_483275, EPI_ISL_483339, EPI_ISL_483466, EPI_ISL_483525                                                                 | UC San Diego Center for Advanced Laboratory Medicine                                             | Andersen lab at Scripps Research                                                                                                   | Ji H Shin; SEARCH Alliance San Diego with David Pride                                                                                                                                                                                                                                                                                                                                                                                                                                                                                                                                                                                                                                                                                                                                      |
| EPI_ISL_537525                                                                                                                                                 | UCLA Pathology Clinical Microbiology Lab                                                         | Kruglyak Lab                                                                                                                       | Guo et al.                                                                                                                                                                                                                                                                                                                                                                                                                                                                                                                                                                                                                                                                                                                                                                                 |
| EPI_ISL_454329                                                                                                                                                 | ULSM - Matosinhos                                                                                | Instituto Nacional de Saude (INSA)                                                                                                 | Borges et al                                                                                                                                                                                                                                                                                                                                                                                                                                                                                                                                                                                                                                                                                                                                                                               |
| EPI_ISL_424890                                                                                                                                                 | UT-Unifed State Labs: Public Health Utah DOH                                                     | Pathogen Discovery, Respiratory Viruses Branch, Division of Viral Diseases, Centers for Disease Control and Prevention             | Alison S. Laufer Halpin; Anna Uehara; Christopher A. Elkins; Clinton R. Paden; Haibin Wang; Jing Zhang; Krista Queen; Mary S. Keckler; Rachel Marine; Suxiang Tong; Yan Li; Ying Tao                                                                                                                                                                                                                                                                                                                                                                                                                                                                                                                                                                                                       |
| EPI_ISL_416655, EPI_ISL_418895, EPI_ISL_418954, EPI_ISL_426073, EPI_ISL_477685, EPI_ISL_570029, EPI_ISL_570081, EPI_ISL_570199, EPI_ISL_570200, EPI_ISL_570345 | UW Virology Lab                                                                                  | UW Virology Lab                                                                                                                    | Alexander Greninger; Amin Addetia; Hong Xie; Keith Jerome; Keith R Jerome; Lasata Shrestha; Meeli-Li Huang; Pavitra Roychoudhury; Truong Nguyen; Victoria M Rachleff                                                                                                                                                                                                                                                                                                                                                                                                                                                                                                                                                                                                                       |
| EPI_ISL_734524, EPI_ISL_734812                                                                                                                                 | UZ Leuven, National Reference Laboratory for Coronaviruses, Laboratory Medicine, Leuven, Belgium | KU Leuven, Rega Institute, Clinical and Epidemiological Virology                                                                   | Bert Vanmechelen; Joan Marti-Carerras; Piet Maes; Tony Wawina-Bokalanga                                                                                                                                                                                                                                                                                                                                                                                                                                                                                                                                                                                                                                                                                                                    |
| EPI_ISL_615094                                                                                                                                                 | Umea klinisk mikrobiologi                                                                        | The Public Health Agency of Sweden                                                                                                 | Anna Risberg; Anna-Malin Linde; Karin Tegmark-Wisell; Maria Lind Karlberg; Mattias Haukland; Mia Brytting; Olov Svartstrom; Oskar Karlsson Lindsjo; Petra Edquist; Reza Advani; Sandra Broddesson                                                                                                                                                                                                                                                                                                                                                                                                                                                                                                                                                                                          |
| EPI_ISL_1008714                                                                                                                                                | Unidad de Patología Clínica                                                                      | Instituto de diagnóstico y Referencia Epidemiologicos (INDRE) Departamento de Virologia                                            | Abriel Rodriguez-Maldonado; Claudia Wong-Arambula; Ernesto Ramirez-Gonzalez.; Fabiola Garces-Ayala; Gisela Barrera-Badillo; Irma Lopez-Martinez; Lucia Hernandez-Rivas; Natividad Cruz-Ortiz; Tatiana Nunez-Garcia                                                                                                                                                                                                                                                                                                                                                                                                                                                                                                                                                                         |
| EPI_ISL_569991                                                                                                                                                 | Unity Health Toronto                                                                             | Ontario Institute for Cancer Research                                                                                              | Bernard Lam; Felicia Vincelli; Ilinca Lungu; Jared T. Simpson; Jeremy Johns; Karel Boissinot; Larissa M. Matukas; Le Luu; Mark Downing; Paul Krzyzanowski; Philip Zuzarte; Ramzi Fattouh; Richard de Borja; Samira Mubareka; TIBDN; Trina Otterman; Wai Sum Siu; Yan Chen; Zhi Cui                                                                                                                                                                                                                                                                                                                                                                                                                                                                                                         |
| EPI_ISL_437955                                                                                                                                                 | Universitaetsklinik für Innere Medizin II Innsbruck                                              | Berghaler laboratory, CeMM Research Center for Molecular Medicine of the Austrian Academy of Sciences                              | Alexander Lercher; Alexandra Popa; Andreas Berghaler; Benedikt Agerer; Christoph Bock; Dorothee von Laer; Elisabeth Puchhammer-Stoeckl; Guenter Weiss; Henrique Colaco; Jakob-Wendelin Genger; Jan Laine; Judith Aberle; Lukas Endler; Manfred Nairz; Mark Smyth; Martin Senekowitsch; Michael Schuster; Stephan Aberle; Thomas Penz; Wegene Borena                                                                                                                                                                                                                                                                                                                                                                                                                                        |
| EPI_ISL_665192                                                                                                                                                 | University College London Hospital                                                               | COVID-19 Genomics UK (COG-UK) Consortium                                                                                           | Catherine Houlihan; Dan Frampton; Judith Heaney; Matthew Byott; Moira Spyer and Eleni Nastouli; Stuart Kirk                                                                                                                                                                                                                                                                                                                                                                                                                                                                                                                                                                                                                                                                                |
| EPI_ISL_775977, EPI_ISL_775992, EPI_ISL_776113                                                                                                                 | University Medical Center Hamburg Eppendorf                                                      | Heinrich Pette Institute, Leibniz Institute for Experimental Virology                                                              | Adam Grundhoff; Alexis Robitaille; Johannes Knobloch; Martin Aepfelbacher; Nicole Fischer; Thomas Günther                                                                                                                                                                                                                                                                                                                                                                                                                                                                                                                                                                                                                                                                                  |
| EPI_ISL_447936                                                                                                                                                 | University of Birmingham                                                                         | COVID-19 Genomics UK (COG-UK) Consortium                                                                                           | Alex Richter; Andrew Bosworth; Andrew D Beggs; Celina M Whalley; Charlotte Poxon; Claire McMurray; Husam Osman; Joanne Stockton; Josh Quick; Kasun Wanigasooriya; Mike Kidd; Nicholas Loman; Oliver Pickles; Radoslaw Poplawski; Samuel Nicholls; Will Rowe                                                                                                                                                                                                                                                                                                                                                                                                                                                                                                                                |
| EPI_ISL_447888, EPI_ISL_548452                                                                                                                                 | University of California, Davis                                                                  | Chan-Zuckerberg Biohub                                                                                                             | CZB Cliahub Consortium                                                                                                                                                                                                                                                                                                                                                                                                                                                                                                                                                                                                                                                                                                                                                                     |
| EPI_ISL_583304, EPI_ISL_590748                                                                                                                                 | University of Michigan Clinical Microbiology Laboratory                                          | Lauring Lab, University of Michigan, Department of Microbiology and Immunology                                                     | Valesano                                                                                                                                                                                                                                                                                                                                                                                                                                                                                                                                                                                                                                                                                                                                                                                   |
| EPI_ISL_417514, EPI_ISL_421315, EPI_ISL_427455, EPI_ISL_428300, EPI_ISL_436572, EPI_ISL_484840, EPI_ISL_484886, EPI_ISL_509835                                 | University of Wisconsin-Madison AIDS Vaccine Research Laboratories                               | University of Wisconsin-Madison AIDS Vaccine Research Laboratories                                                                 | Gage Moreno; Katarina Braun; et al. AIDS Vaccine Research Laboratories                                                                                                                                                                                                                                                                                                                                                                                                                                                                                                                                                                                                                                                                                                                     |
| EPI_ISL_450828                                                                                                                                                 | Uppsala Narakut Aleris                                                                           | The Public Health Agency of Sweden                                                                                                 | Anna Risberg; Anna-Malin Linde; Annika Nilsson; Karin Tegmark-Wisell; Maria Lind Karlberg; Mia Brytting; Olov Svartstrom; Oskar Karlsson Lindsjo; Theresa Enkirch                                                                                                                                                                                                                                                                                                                                                                                                                                                                                                                                                                                                                          |
| EPI_ISL_654953                                                                                                                                                 | Uppsala klinisk mikrobiologi                                                                     | The Public Health Agency of Sweden                                                                                                 | Anna Risberg; Anna-Malin Linde; Karin Tegmark-Wisell; Maria Lind Karlberg; Mattias Haukland; Mia Brytting; Olov Svartstrom; Oskar Karlsson Lindsjo; Petra Edquist; Reza Advani; Sandra Broddesson                                                                                                                                                                                                                                                                                                                                                                                                                                                                                                                                                                                          |
| EPI_ISL_417977, EPI_ISL_430035, EPI_ISL_498632, EPI_ISL_524382, EPI_ISL_648561, EPI_ISL_648573                                                                 | Utah Public Health Laboratory                                                                    | Utah Public Health Laboratory                                                                                                      | David R. Hillyard; E. Susan Slechta; Erin L. Young; Erin Young; Heidi Butz; Jeffrey B. Stevenson; Kelly Oakeson; Melanie A. Mallory; Michael T. Pyne; Salika M. Shakir; Tara Gallagher                                                                                                                                                                                                                                                                                                                                                                                                                                                                                                                                                                                                     |
| EPI_ISL_549173                                                                                                                                                 | Vestfold Hospital, Toensberg Department of Microbiology                                          | Norwegian Institute of Public Health, Department of Virology                                                                       | Hilde Elshaug; Hilde Synnøve Vollan; Kamilla Heddeland Instefjord; Karoline Bragstad; Kathrine Stene-Johansen; Olav Hungnes; Rasmus Riis Kopperud                                                                                                                                                                                                                                                                                                                                                                                                                                                                                                                                                                                                                                          |
| EPI_ISL_426677, EPI_ISL_426682, EPI_ISL_426784, EPI_ISL_456454, EPI_ISL_456589                                                                                 | Victorian Infectious Diseases Reference Laboratory (VIDRL)                                       | Microbiological Diagnostic Unit Public Health Laboratory and Victorian Infectious Diseases Reference Laboratory, Doherty Institute | Caly L.; Druce J.; Sait, M.; Schultz M.; Seemann T.; Sherry, N.                                                                                                                                                                                                                                                                                                                                                                                                                                                                                                                                                                                                                                                                                                                            |
| EPI_ISL_480662, EPI_ISL_521953                                                                                                                                 | Victorian Infectious Diseases Reference Laboratory (VIDRL)                                       | VIDRL and MDU-PHL                                                                                                                  | Caly L.; Druce J.; Sait, M.; Schultz M.; Seemann T.; Sherry, N.                                                                                                                                                                                                                                                                                                                                                                                                                                                                                                                                                                                                                                                                                                                            |
| EPI_ISL_419753, EPI_ISL_419754, EPI_ISL_419771                                                                                                                 | Victorian Infectious Diseases Reference Laboratory (VIDRL)                                       | Victorian Infectious Diseases Reference Laboratory and Microbiological Diagnostic Unit Public Health Laboratory, Doherty Institute | Caly L.; Druce J.; Sait, M.; Schultz M.; Seemann T.; Sherry, N.                                                                                                                                                                                                                                                                                                                                                                                                                                                                                                                                                                                                                                                                                                                            |
| EPI_ISL_560401                                                                                                                                                 | Vilnius University Hospital Santaros Klinikos, Vilnius University                                | Institute of Biotechnology, Life Sciences Center, Vilnius University and Thermo Fisher Scientific                                  | Albertas Timinskas; Alma Gedvilaitė; Aurelija Zvirbliene; Daniel Naumovas; Justinas Siliaks; Laimonas Griskevicius; Ligita Jancioriene; Mindaugas Paulauskas                                                                                                                                                                                                                                                                                                                                                                                                                                                                                                                                                                                                                               |
| EPI_ISL_451722, EPI_ISL_486535, EPI_ISL_489977, EPI_ISL_511985, EPI_ISL_535645, EPI_ISL_541472                                                                 | Viollier AG                                                                                      | Department of Biosystems Science and Engineering, ETH Zürich                                                                       | Christian Beisel; Christiane Beckmann; Christoph Noppen; Elodie Burcklen; Ina Nissen; Ivan Topolsky; Maurice Redondo; Natascha Santacroce; Niko Beerenwinkel; Noemie Santamaria de Souza; Olivier Kobel; Pedro Ferreira; Philipp Jablonski; Sarah Nadeau; Sophie Seidel; Susana Posada-Céspedes; Tanja Stadler; Tobias Schär                                                                                                                                                                                                                                                                                                                                                                                                                                                               |
| EPI_ISL_434710, EPI_ISL_435156, EPI_ISL_437357                                                                                                                 | Viral Respiratory Lab, National Institute for Biomedical Research (INRB)                         | Pathogen Sequencing Lab, National Institute for Biomedical Research (INRB)                                                         | Adrienne Amuri Aziza; Allison Black; Amuri Aziza; Andrew Rambaut; Catherine Pratt; Eddy Kinganda-Lusamaki; Edith Nkwembe; Francisca Muyembe Mawete; Ian Goodfellow; James Hadfield; Jean-Jacques Muyembe Tarmfum; Josh Quick; Kristian Andersen; Matthias Pauthner; Michael Wiley; Nick Loman; Placide Mbala-Kingebeni; Steve Ahuka-Mundeke; Trevor Bedford                                                                                                                                                                                                                                                                                                                                                                                                                                |
| EPI_ISL_485853, EPI_ISL_522817,                                                                                                                                | Virginia DCLS                                                                                    | Virginia DCLS                                                                                                                      | Virginia DCLS                                                                                                                                                                                                                                                                                                                                                                                                                                                                                                                                                                                                                                                                                                                                                                              |

|                                                                                                                                                                                |                                                                                                                                                                                                   |                                                                                                                                 |                                                                                                                                                                                                                                                                                                                                                                                                                                                                                                                                   |
|--------------------------------------------------------------------------------------------------------------------------------------------------------------------------------|---------------------------------------------------------------------------------------------------------------------------------------------------------------------------------------------------|---------------------------------------------------------------------------------------------------------------------------------|-----------------------------------------------------------------------------------------------------------------------------------------------------------------------------------------------------------------------------------------------------------------------------------------------------------------------------------------------------------------------------------------------------------------------------------------------------------------------------------------------------------------------------------|
| EPI_ISL_526901<br>EPI_ISL_487893,<br>EPI_ISL_488974                                                                                                                            | Virology Department, Royal Infirmary of Edinburgh, NHS Lothian / School of Biological Sciences, University of Edinburgh                                                                           | Wellcome Sanger Institute for the COVID-19 Genomics UK (COG-UK) consortium                                                      | Colquhoun R; Cordelia Langford; David K. Jackson; Dewar R; Dominic Kwiatkowski; Ewan Harrison; Hill V; Ian Johnston; Jackson B; John Sillitoe on behalf of the Wellcome Sanger Institute COVID-19 Surveillance Team ( <a href="http://www.sanger.ac.uk/covid-team">http://www.sanger.ac.uk/covid-team</a> ); McCrone JT; McHugh M; O'Toole A; Rambaut A; Roberto Amato; Rooke S; Scher E; Sonia Goncalves; Templeton K and Alex Alderton; Yu X                                                                                    |
| EPI_ISL_425866, EPI_ISL_425870, EPI_ISL_425937, EPI_ISL_433117, EPI_ISL_439237, EPI_ISL_453122, EPI_ISL_473936                                                                 | see above                                                                                                                                                                                         | COVID-19 Genomics UK (COG-UK) Consortium                                                                                        | Balcaza C; Colquhoun R; Dewar R; Gallagher M; Hill V; Jackson B; McCrone JT; McHugh M; O'Toole A; O'Toole A; O,ÄöToole vÄ; Rambaut A; Rooke S; Scher E; Templeton K; Williams TC; Yu X                                                                                                                                                                                                                                                                                                                                            |
| EPI_ISL_420171,<br>EPI_ISL_420289                                                                                                                                              | Virology Department, Sheffield Teaching Hospitals NHS Foundation Trust                                                                                                                            | Department of Infection, Immunity and Cardiovascular Disease, The Florey Institute, The Medical School, University of Sheffield | Adri Angyal; Alex Keeley; Benjamin Lindsey; Cariad Evans; Danielle Groves; Dave Partridge; Luke Green; Matthew Parker; Matthew Wyles; Mehmet Yavuz; Mohammad Raza; Paul Parsons; Rachel Tucker; Rebecca Brown; Thushan de Silva                                                                                                                                                                                                                                                                                                   |
| EPI_ISL_537248                                                                                                                                                                 | Virology Department, Sheffield Teaching Hospitals NHS Foundation Trust / Department of Infection, Immunity and Cardiovascular Disease, The Medical School, University of Sheffield                | Wellcome Sanger Institute for the COVID-19 Genomics UK (COG-UK) consortium                                                      | Adri Angyal; Alex Keeley; Benjamin Lindsey; Cariad Evans and Alex Alderton; Cordelia Langford; Danielle Groves; Dave Partridge; David K. Jackson; Dominic Kwiatkowski; Ewan Harrison; Ian Johnston; John Sillitoe on behalf of the Wellcome Sanger Institute COVID-19 Surveillance Team; Luke Green; Matthew Parker; Matthew Wyles; Mehmet Yavuz; Mohammad Raza; Paul Parsons; Rachel Tucker; Rebecca Brown; Roberto Amato; Sonia Goncalves; Thushan de Silva                                                                     |
| EPI_ISL_432720                                                                                                                                                                 | Virology Department, Sheffield Teaching Hospitals NHS Foundation Trust / Virology Department, Sheffield Teaching Hospitals NHS Foundation Trust                                                   | COVID-19 Genomics UK (COG-UK) Consortium                                                                                        | Adri Angyal; Alex Keeley; Benjamin Lindsey; Cariad Evans; Danielle Groves; Dave Partridge; Luke Green; Matthew Parker; Matthew Wyles; Mehmet Yavuz; Mohammad Raza; Paul Parsons; Rachel Tucker; Rebecca Brown; Thushan de Silva                                                                                                                                                                                                                                                                                                   |
| EPI_ISL_462000,<br>EPI_ISL_475466,<br>EPI_ISL_490581                                                                                                                           | Virology Department, Sheffield Teaching Hospitals NHS Foundation Trust/Department of Infection, Immunity and Cardiovascular Disease, The Medical School, University of Sheffield                  | COVID-19 Genomics UK (COG-UK) Consortium                                                                                        | Adri Angyal; Alex Keeley; Benjamin Lindsey; Cariad Evans; Danielle Groves; Dave Partridge; Katie Johnson; Laura Carrilero; Luke Green; Matthew Parker; Matthew Wyles; Mehmet Yavuz; Mohammad Raza; Nikki Smith; Paul Parsons; Rachel Tucker; Rebecca Brown; Thushan de Silva                                                                                                                                                                                                                                                      |
| EPI_ISL_448864                                                                                                                                                                 | Virology Laboratory, Castle Hill Hospital, Hull University Teaching Hospitals NHS Trust/Department of Infection, Immunity and Cardiovascular Disease, The Medical School, University of Sheffield | COVID-19 Genomics UK (COG-UK) Consortium                                                                                        | Adri Angyal; Alex Keeley; Benjamin Lindsey; Cariad Evans; Danielle Groves; Dave Partridge; Katie Johnson; Laura Carrilero; Luke Green; Matthew Parker; Matthew Wyles; Mehmet Yavuz; Mohammad Raza; Nikki Smith; Paul Parsons; Rachel Tucker; Rebecca Brown; Thushan de Silva                                                                                                                                                                                                                                                      |
| EPI_ISL_707943                                                                                                                                                                 | Virology, Universitätsklinikum des Saarlandes                                                                                                                                                     | Epigenetics, Saarland University                                                                                                | Jörn Walter; Kathrin Kattler; Markus Vogelgesang; Sascha Tierling; Sigrun Smola; Stefan Lohse                                                                                                                                                                                                                                                                                                                                                                                                                                     |
| EPI_ISL_427322,<br>EPI_ISL_430084,<br>EPI_ISL_524011,<br>EPI_ISL_733289                                                                                                        | WHO National Influenza Centre Russian Federation                                                                                                                                                  | WHO National Influenza Centre Russian Federation                                                                                | Andrey Komissarov; Anna Ivanova; Artem Fadeev; Daria Danilenko; Dmitry Bazhenov; Dmitry Lioznov; Elena Nabieva; Georgii Bazykin; Ksenia Safina; Kseniya Komissarova; Mariia Sergeeva                                                                                                                                                                                                                                                                                                                                              |
| EPI_ISL_525612                                                                                                                                                                 | Wadsworth Center, New York State Department of Health                                                                                                                                             | Wadsworth Center, New York State Department of Health                                                                           | Daryl M. Lamson; Erica Lasek-Nesselquist; Jonathan Pitnick; Kirsten St. George; Matthew D. Shudt; Navjot Singh; Sara Griesemer                                                                                                                                                                                                                                                                                                                                                                                                    |
| EPI_ISL_676821,<br>EPI_ISL_676923,<br>EPI_ISL_676946                                                                                                                           | Wadsworth Center, New York State Department of Health                                                                                                                                             | Wadsworth Center, New York State Department of Health                                                                           | Alexis Russel; Daryl M. Lamson; Erasmus Schneider; Erica Lasek-Nesselquist; John Kelly; Jonathan Pitnick; Kirsten St. George; Navjot Singh; Sara Griesemer                                                                                                                                                                                                                                                                                                                                                                        |
| EPI_ISL_456190                                                                                                                                                                 | Waikato Hospital                                                                                                                                                                                  | Institute of Environmental Science and Research (ESR)                                                                           | Anja Werno; Antje van der Linden; Arlo Upton; Chris Mansell; David Hammer; Dragana Drinkovic; Erasmus Smit; Gary McAuliffe; Hana Sofia Andersson; James Ussher; Jill Sherwood; Joep de Lig; Josh Freeman; Julia Howard; Juliet Elvy; Lauren Jelly; Mary DeAlmeida; Matt Blakiston; Matt Storey; Matthew Rogers; Max Bloomfield; Michael Addidle; Michelle Balm; Sally Roberts; Sarah Jefferies; Sharmini Muttaiyah; Susan Morpeth; Susan Taylor; Timothy Blackmore; Vani Sathyendran; Veronica Playle; Virginia Hope; Xiaoyun Ren |
| EPI_ISL_415920, EPI_ISL_420985, EPI_ISL_421004, EPI_ISL_421005, EPI_ISL_422024, EPI_ISL_422099, EPI_ISL_422151, EPI_ISL_432425, EPI_ISL_445448, EPI_ISL_445688, EPI_ISL_446423 | see above                                                                                                                                                                                         | Wales Specialist Virology Centre                                                                                                | Alec Birchley; Alexander Adams; Amy Gaskin; Bree Gatica-Wilcox; Catherine Moore; Jason Coombes; Joanne Watkins; Johnathan Evans; Laura Gifford; Lauren Gilbert; Lee Graham; Malorie Perry; Matt Bull; Matthew Bull; Nicole Pacchiarini; Sally Corden; Sara Kumziene-Summerhayes; Sara Rey; Sarah Taylor; Simon Cottrell; Simon Cottrell Sara Rey; Sophie Jones; Tom Connor                                                                                                                                                        |
| EPI_ISL_472747,<br>EPI_ISL_472967,<br>EPI_ISL_474318,<br>EPI_ISL_627207                                                                                                        | Wales Specialist Virology Centre Sequencing lab; Pathogen Genomics Unit                                                                                                                           | COVID-19 Genomics UK (COG-UK) Consortium                                                                                        | Alec Birchley; Alexander Adams; Amy Gaskin; Angela Marchbank; Bree Gatica-Wilcox; Catherine Moore; Jason Coombes; Joanne Watkins; Joel Southgate; Johnathan Evans; Laura Gifford; Lauren Gilbert; Lee Graham; Malorie Perry; Matthew Bull; Nicole Pacchiarini; Sally Corden; Sara Kumziene-Summerhayes; Sara Rey; Sarah Taylor; Simon Cottrell; Sophie Jones; Tom Connor                                                                                                                                                          |
| EPI_ISL_417137, EPI_ISL_434164, EPI_ISL_434241, EPI_ISL_449910, EPI_ISL_463350, EPI_ISL_463530, EPI_ISL_463605, EPI_ISL_495676, EPI_ISL_495757, EPI_ISL_496205, EPI_ISL_497205 | see above                                                                                                                                                                                         | Washington State Department of Health                                                                                           | Amanda Adler; Barry R. Lutz; Benjamin Pelle; Brian Hiatt; Caitlin R. Wolf; Chris D. Frazar; Chu et al; Chu et al; Deborah A. Nickerson; Elisabeth Brandstetter; Geoff; Geoff Melly; Helen Y. Chu; Janet A. Englund; Jay Shendure; Jover Lee; Kairsten Fay; Kirsten Lacombe; Lea M. Starita; Mark J. Rieder; Matthew Richardson; Matthew Thompson; Melissa Truong; Michael Boeckh; Michael Famulare; Misja Ilcisin; Peter D. Han; Philip Dykema; Romesh Gautom; Scott Lindquist; Thomas R. Sibley; Trevor Bedford                  |
| EPI_ISL_425752, EPI_ISL_425759, EPI_ISL_425762, EPI_ISL_425768, EPI_ISL_425772, EPI_ISL_425797, EPI_ISL_433327, EPI_ISL_477940                                                 | see above                                                                                                                                                                                         | West of Scotland Specialist Virology Centre, NHSGGC / MRC-University of Glasgow                                                 | Alasdair MacLean; Alice Broos; Ana da Silva Filipe; Antonia Ho; Daniel Mair; David L Robertson; Elihu Aranday-Cortes; Emma Thomson; James Shepherd; Jenna Nichols; Joseph Hughes; Kathy Li; Kathy Smollett; Kirstyn Bruncker; Kyriaki Nomikou; Lily Tong; Marc Niebel; Natasha Jesudason; Natasha Johnson; Patawee Asamaphan; Rajiv Shah; Richard Orton; Rory Gunson; Rory Gunson; Sarah McDonald; Sreenu Vattipally; Stephen Carmichael; Yasmin Parr                                                                             |
| EPI_ISL_422425                                                                                                                                                                 | Zhejiang Provincial Center for Disease Control and Prevention                                                                                                                                     | Zhejiang Provincial Center for Disease Control and Prevention                                                                   | Yanjun Zhang; Yi Sun                                                                                                                                                                                                                                                                                                                                                                                                                                                                                                              |
| EPI_ISL_437612                                                                                                                                                                 | unknown                                                                                                                                                                                           | Faculty of Medicine                                                                                                             | Buathong, R.; Bunprakob, S.; Ghai, S.; Joyjinda, Y.; Mungaomklang, A.; Petcharat, S.; Pilpat; Prasithsirikul, W.; Rodpan, A.; Sirichan, N.; T. and Hemachudha, T.; Wacharapluesadee, S.                                                                                                                                                                                                                                                                                                                                           |
| EPI_ISL_507017,<br>EPI_ISL_507034                                                                                                                                              | unknown                                                                                                                                                                                           | Infectious Diseases Research, King Abdullah International Medical Research Center (KAIMRC)                                      | Alghoribi; M.F.                                                                                                                                                                                                                                                                                                                                                                                                                                                                                                                   |
