# Supplementary material for: Genetic Analysis of SARS-CoV-2 Variants in Mexico during the First Year of the COVID-19 Pandemic
Source: MDPI journal article supplement (doi:10.3390/v13112161), 2021-10-26
Supplement: s1 [file s1]

**Table S5. List of variants that appears one or two times throughout the year in Mexico.**

[illegible]

[illegible]

[illegible]

[illegible]
