# Supplementary material for: Genetic Analysis of SARS-CoV-2 Variants in Mexico during the First Year of the COVID-19 Pandemic
Source: MDPI journal article supplement (doi:10.3390/v13112161), 2021-10-26
Supplement: s1 [file s1]

**Table S4. List of nucleotide and amino acid changes of the 3915 Mexican sequences compared to the reference strain Wuhan-Hu-1.**

| Genomic position | Ancestral nucleotide | Mutated nucleotide | ORF           | ORF position | gene        | Gene position | Type of Substitution | Amino acid replacement | Number of sequences |
|------------------|----------------------|--------------------|---------------|--------------|-------------|---------------|----------------------|------------------------|---------------------|
| 745              | c                    | t                  | ORF1ab        | 480          | nsp1        | 480           | S                    |                        | 72                  |
| 745              | c                    | a                  | ORF1ab        | 480          | nsp1        | 480           | NS                   | N160K                  | 1                   |
| 806              | g                    | a                  | ORF1ab        | 541          | nsp2        | 1             | NS                   | A1T                    | 62                  |
| 936              | c                    | t                  | ORF1ab        | 671          | nsp2        | 131           | NS                   | T44I                   | 94                  |
| 1059             | c                    | t                  | ORF1ab        | 794          | nsp2        | 254           | NS                   | T85I                   | 368                 |
| 1191             | c                    | a                  | ORF1ab        | 926          | nsp2        | 386           | NS                   | P129Q                  | 8                   |
| 1191             | c                    | t                  | ORF1ab        | 926          | nsp2        | 386           | NS                   | P129L                  | 41                  |
| 1288             | c                    | t                  | ORF1ab        | 1023         | nsp2        | 483           | S                    |                        | 50                  |
| 1738             | g                    | t                  | ORF1ab        | 1473         | nsp2        | 933           | S                    |                        | 428                 |
| 2395             | c                    | t                  | ORF1ab        | 2130         | nsp2        | 1590          | S                    |                        | 61                  |
| 2516             | g                    | t                  | ORF1ab        | 2251         | nsp2        | 1711          | NS                   | V571L                  | 51                  |
| 2597             | t                    | c                  | ORF1ab        | 2332         | nsp2        | 1792          | S                    |                        | 57                  |
| <b>3037</b>      | <b>c</b>             | <b>t</b>           | <b>ORF1ab</b> | <b>2772</b>  | <b>nsp3</b> | <b>318</b>    | <b>S</b>             |                        | <b>3886</b>         |
| 3037             | c                    | g                  | ORF1ab        | 2772         | nsp3        | 318           | NS                   | F106L                  | 1                   |
| <b>3140</b>      | <b>c</b>             | <b>t</b>           | <b>ORF1ab</b> | <b>2875</b>  | <b>nsp3</b> | <b>421</b>    | <b>NS</b>            | <b>P141S</b>           | <b>1534</b>         |
| 3692             | g                    | t                  | ORF1ab        | 3427         | nsp3        | 973           | NS                   | V325F                  | 83                  |
| 3745             | t                    | c                  | ORF1ab        | 3480         | nsp3        | 1026          | S                    |                        | 94                  |
| 3871             | g                    | t                  | ORF1ab        | 3606         | nsp3        | 1152          | NS                   | K384N                  | 104                 |
| 4582             | c                    | t                  | ORF1ab        | 4317         | nsp3        | 1863          | S                    |                        | 256                 |
| 5140             | c                    | a                  | ORF1ab        | 4875         | nsp3        | 2421          | NS                   | D807E                  | 44                  |
| 5140             | c                    | t                  | ORF1ab        | 4875         | nsp3        | 2421          | S                    |                        | 5                   |
| 5183             | c                    | t                  | ORF1ab        | 4918         | nsp3        | 2464          | NS                   | P822S                  | 69                  |
| 5999             | a                    | g                  | ORF1ab        | 5734         | nsp3        | 3280          | NS                   | I1094V                 | 55                  |
| 6285             | c                    | t                  | ORF1ab        | 6020         | nsp3        | 3566          | NS                   | T1189I                 | 63                  |
| 6404             | g                    | t                  | ORF1ab        | 6139         | nsp3        | 3685          | NS                   | V1229F                 | 49                  |
| 6985             | a                    | t                  | ORF1ab        | 6720         | nsp3        | 4266          | S                    |                        | 60                  |
| 8655             | c                    | t                  | ORF1ab        | 8390         | nsp4        | 101           | NS                   | S34F                   | 40                  |
| 8947             | c                    | t                  | ORF1ab        | 8682         | nsp4        | 393           | S                    |                        | 61                  |
| 9319             | c                    | t                  | ORF1ab        | 9054         | nsp4        | 765           | S                    |                        | 67                  |
| 9738             | g                    | c                  | ORF1ab        | 9473         | nsp4        | 1184          | NS                   | S395T                  | 60                  |
| <b>10029</b>     | <b>c</b>             | <b>t</b>           | <b>ORF1ab</b> | <b>9764</b>  | <b>nsp4</b> | <b>1475</b>   | <b>NS</b>            | <b>T492I</b>           | <b>1635</b>         |
| 10319            | c                    | t                  | ORF1ab        | 10054        | nsp5        | 265           | NS                   | L89F                   | 138                 |
| 10323            | a                    | g                  | ORF1ab        | 10058        | nsp5        | 269           | NS                   | K90R                   | 109                 |
| <b>10954</b>     | <b>c</b>             | <b>t</b>           | <b>ORF1ab</b> | <b>10689</b> | <b>nsp5</b> | <b>900</b>    | <b>S</b>             |                        | <b>1532</b>         |

|              |          |          |               |              |              |            |           |              |             |
|--------------|----------|----------|---------------|--------------|--------------|------------|-----------|--------------|-------------|
| 11083        | g        | t        | ORF1ab        | 10818        | nsp6         | 111        | NS        | L37F         | 81          |
| 11083        | g        | a        | ORF1ab        | 10818        | nsp6         | 111        | S         |              | 2           |
| <b>11117</b> | <b>a</b> | <b>g</b> | <b>ORF1ab</b> | <b>10852</b> | <b>nsp6</b>  | <b>145</b> | <b>NS</b> | <b>I49V</b>  | <b>1530</b> |
| 11365        | g        | t        | ORF1ab        | 11100        | nsp6         | 393        | S         |              | 72          |
| 11365        | g        | a        | ORF1ab        | 11100        | nsp6         | 393        | S         |              | 1           |
| 11417        | g        | t        | ORF1ab        | 11152        | nsp6         | 445        | NS        | V149F        | 40          |
| 11575        | c        | t        | ORF1ab        | 11310        | nsp6         | 603        | S         |              | 75          |
| 11824        | c        | a        | ORF1ab        | 11559        | nsp6         | 852        | S         |              | 82          |
| 11824        | c        | t        | ORF1ab        | 11559        | nsp6         | 852        | S         |              | 45          |
| 11866        | c        | t        | ORF1ab        | 11601        | nsp7         | 25         | S         |              | 40          |
| 11916        | c        | t        | ORF1ab        | 11651        | nsp7         | 75         | NS        | Syn          | 57          |
| 12100        | c        | t        | ORF1ab        | 11835        | nsp8         | 9          | S         |              | 60          |
| 12412        | c        | t        | ORF1ab        | 12147        | nsp8         | 321        | S         |              | 74          |
| <b>12789</b> | <b>c</b> | <b>t</b> | <b>ORF1ab</b> | <b>12524</b> | <b>nsp9</b>  | <b>104</b> | <b>NS</b> | <b>T35I</b>  | <b>1495</b> |
| 12878        | a        | g        | ORF1ab        | 12613        | nsp9         | 193        | NS        | I65V         | 59          |
| 13119        | c        | t        | ORF1ab        | 12854        | nsp10        | 95         | NS        | A32V         | 71          |
| 13498        | a        | g        | ORF1ab        | 31           | nsp12        | 31         | NS        | T11A         | 62          |
| 13713        | g        | a        | ORF1ab        | 246          | nsp12        | 246        | S         |              | 60          |
| 14313        | t        | c        | ORF1ab        | 846          | nsp12        | 846        | S         |              | 72          |
| <b>14408</b> | <b>c</b> | <b>t</b> | <b>ORF1ab</b> | <b>941</b>   | <b>nsp12</b> | <b>941</b> | <b>NS</b> | <b>P314L</b> | <b>3890</b> |
| 15921        | g        | t        | ORF1ab        | 2454         | nsp12        | 2454       | S         |              | 65          |
| 16394        | c        | t        | ORF1ab        | 2927         | nsp13        | 158        | NS        | P53L         | 63          |
| 17014        | g        | t        | ORF1ab        | 3547         | nsp13        | 778        | NS        | D260Y        | 131         |
| 18424        | a        | g        | ORF1ab        | 4957         | nsp14        | 385        | NS        | N129D        | 122         |
| 18693        | c        | t        | ORF1ab        | 5226         | nsp14        | 654        | S         |              | 52          |
| 19011        | c        | t        | ORF1ab        | 5544         | nsp14        | 972        | S         |              | 5           |
| 19011        | c        | a        | ORF1ab        | 5544         | nsp14        | 972        | NS        | D324E        | 35          |
| <b>19839</b> | <b>t</b> | <b>c</b> | <b>ORF1ab</b> | <b>6372</b>  | <b>nsp15</b> | <b>219</b> | <b>S</b>  |              | <b>2087</b> |
| 19974        | a        | g        | ORF1ab        | 6507         | nsp15        | 354        | S         |              | 420         |
| 19974        | a        | t        | ORF1ab        | 6507         | nsp15        | 354        | S         |              | 1           |
| 20268        | a        | g        | ORF1ab        | 6801         | nsp15        | 648        | S         |              | 918         |
| 21304        | c        | t        | ORF1ab        | 7837         | nsp16        | 646        | NS        | R216C        | 114         |
| 21304        | c        | a        | ORF1ab        | 7837         | nsp16        | 646        | NS        | R216S        | 6           |
| <b>21306</b> | <b>c</b> | <b>t</b> | <b>ORF1ab</b> | <b>7839</b>  | <b>nsp16</b> | <b>648</b> | <b>S</b>  |              | <b>1369</b> |
| 21575        | c        | t        | S             | 13           |              |            | NS        | L5F          | 80          |
| 21600        | g        | t        | S             | 38           |              |            | NS        | S13I         | 118         |
| 21974        | g        | t        | S             | 412          |              |            | NS        | D138Y        | 57          |
| 21974        | g        | c        | S             | 412          |              |            | NS        | D138H        | 4           |

|              |          |          |          |             |           |              |             |
|--------------|----------|----------|----------|-------------|-----------|--------------|-------------|
| 22018        | g        | t        | S        | 456         | NS        | W152C        | 117         |
| 22331        | g        | a        | S        | 769         | NS        | G257S        | 53          |
| 22917        | t        | g        | S        | 1355        | NS        | L452R        | 131         |
| <b>22995</b> | <b>c</b> | <b>a</b> | <b>S</b> | <b>1433</b> | <b>NS</b> | <b>T478K</b> | <b>1495</b> |
| 22995        | c        | t        | S        | 1433        | NS        | T478I        | 1           |
| <b>23403</b> | <b>a</b> | <b>g</b> | <b>S</b> | <b>1841</b> | <b>NS</b> | <b>D614G</b> | <b>3859</b> |
| 23587        | g        | t        | S        | 2025        | NS        | Q675H        | 14          |
| 23587        | g        | c        | S        | 2025        | NS        | Q675H        | 44          |
| 23593        | g        | t        | S        | 2031        | NS        | Q677H        | 41          |
| 23593        | g        | c        | S        | 2031        | NS        | Q677H        | 21          |
| 23593        | g        | a        | S        | 2031        | S         |              | 1           |
| <b>23604</b> | <b>c</b> | <b>a</b> | <b>S</b> | <b>2042</b> | <b>NS</b> | <b>P681H</b> | <b>1627</b> |
| 23604        | c        | g        | S        | 2042        | NS        | P681R        | 24          |
| <b>23756</b> | <b>a</b> | <b>g</b> | <b>S</b> | <b>2194</b> | <b>NS</b> | <b>T732A</b> | <b>1981</b> |
| 23756        | a        | t        | S        | 2194        | NS        | T732S        | 14          |
| 24076        | t        | c        | S        | 2514        | S         |              | 175         |
| 24349        | t        | c        | S        | 2787        | S         |              | 59          |
| 24904        | c        | t        | S        | 3342        | S         |              | 41          |
| 25123        | t        | c        | S        | 3561        | S         |              | 46          |
| 25563        | g        | t        | ORF3a    | 171         | NS        | Q57H         | 396         |
| 25563        | g        | c        | ORF3a    | 171         | NS        | Q57H         | 6           |
| 25577        | t        | c        | ORF3a    | 185         | NS        | I62T         | 53          |
| 25613        | c        | t        | ORF3a    | 221         | NS        | S74F         | 61          |
| 25782        | c        | t        | ORF3a    | 390         | S         |              | 54          |
| 25844        | c        | t        | ORF3a    | 452         | NS        | T151I        | 122         |
| 25906        | g        | t        | ORF3a    | 514         | NS        | G172C        | 76          |
| 25906        | g        | c        | ORF3a    | 514         | NS        | G172R        | 1           |
| 25907        | g        | t        | ORF3a    | 515         | NS        | G172V        | 125         |
| 25907        | g        | c        | ORF3a    | 515         | NS        | G172A        | 1           |
| 25912        | g        | t        | ORF3a    | 520         | NS        | G174C        | 138         |
| 26681        | c        | t        | M        | 159         | S         |              | 164         |
| 27756        | a        | g        | ORF7a    | 363         | S         |              | 48          |
| 27756        | a        | g        | ORF7b    | 1           | NS        | M1V          | 48          |
| 27904        | t        | c        | ORF8     | 11          | NS        | L4P          | 321         |
| 27904        | t        | g        | ORF8     | 11          | NS        | L4R          | 1           |
| 27921        | a        | g        | ORF8     | 28          | NS        | I10V         | 95          |
| 27921        | a        | t        | ORF8     | 28          | NS        | I10F         | 1           |
| 27964        | c        | t        | ORF8     | 71          | NS        | S24L         | 134         |

|              |          |          |          |            |            |              |             |
|--------------|----------|----------|----------|------------|------------|--------------|-------------|
| 27987        | g        | t        | ORF8     | 94         | NS         | V32L         | 48          |
| 27987        | g        | c        | ORF8     | 94         | NS         | V32L         | 3           |
| 27987        | g        | a        | ORF8     | 94         | NS         | V32I         | 2           |
| 28001        | g        | t        | ORF8     | 108        | S          |              | 106         |
| 28001        | g        | c        | ORF8     | 108        | S          |              | 1           |
| 28087        | c        | t        | ORF8     | 194        | NS         | A65V         | 127         |
| 28253        | c        | t        | ORF8     | 360        | S          |              | 138         |
| 28253        | c        | g        | ORF8     | 360        | NS         | F120L        | 2           |
| 28378        | g        | t        | N        | 105        | S          |              | 66          |
| 28378        | g        | a        | N        | 105        | S          |              | 2           |
| 28378        | g        | c        | N        | 105        | S          |              | 1           |
| 28472        | c        | t        | N        | 199        | NS         | P67S         | 125         |
| 28854        | c        | t        | N        | 581        | NS         | S194L        | 759         |
| 28869        | c        | t        | N        | 596        | NS         | P199L        | 123         |
| <b>28881</b> | <b>g</b> | <b>a</b> | <b>N</b> | <b>608</b> | <b>NS</b>  | <b>R203K</b> | <b>2348</b> |
| 28881        | g        | t        | N        | 608        | NS         | R203M        | 4           |
| <b>28882</b> | <b>g</b> | <b>a</b> | <b>N</b> | <b>609</b> | <b>S</b>   |              | <b>2348</b> |
| <b>28883</b> | <b>g</b> | <b>c</b> | <b>N</b> | <b>610</b> | <b>NS</b>  | <b>G204R</b> | <b>2346</b> |
| 28887        | c        | t        | N        | 614        | NS         | T205I        | 160         |
| 28975        | g        | t        | N        | 702        | NS         | M234I        | 109         |
| 28975        | g        | a        | N        | 702        | NS         | M234I        | 1           |
| <b>29197</b> | <b>c</b> | <b>t</b> | <b>N</b> | <b>924</b> | <b>S</b>   |              | <b>1531</b> |
| 29227        | g        | t        | N        | 954        | S          |              | 90          |
| 29317        | t        | c        | N        | 1044       | S          |              | 61          |
| 29362        | c        | t        | N        | 1089       | S          |              | 96          |
| 29402        | g        | t        | N        | 1129       | NS         | D377Y        | 41          |
| 29422        | g        | t        | N        | 1149       | S          |              | 44          |
| 29422        | g        | a        | N        | 1149       | S          |              | 1           |
| 29527        | g        | t        | N        | 1254       | NS         | Q418H        | 198         |
| 29527        | g        | a        | N        | 1254       | S          |              | 4           |
| 29710        | t        | c        | 3UTR     | 36         | Non-coding |              | 40          |
| 29710        | t        | a        | 3UTR     | 36         | Non-coding |              | 1           |
| 29751        | g        | t        | 3UTR     | 77         | Non-coding |              | 39          |
| 29751        | g        | c        | 3UTR     | 77         | Non-coding |              | 15          |
| 29751        | g        | a        | 3UTR     | 77         | Non-coding |              | 1           |
