# Supplementary material for: Genetic Analysis of SARS-CoV-2 Variants in Mexico during the First Year of the COVID-19 Pandemic
Source: MDPI journal article supplement (doi:10.3390/v13112161), 2021-10-26
Supplement: s1 [file s1]

**Table S6. Probational density in each federal state of Mexico**

| State | Poblation  | Persons/km2 | Region id |
|-------|------------|-------------|-----------|
| AGU   | 1,425,607  | 254         | CN        |
| QUE   | 2,368,467  | 203         | CN        |
| GUA   | 6,166,934  | 201         | CN        |
| SLP   | 2,822,255  | 46          | CN        |
| ZAC   | 1,622,138  | 22          | CN        |
| CMX   | 9,209,944  | 6163        | CS        |
| MEX   | 16,992,418 | 760         | CS        |
| MOR   | 1,971,520  | 404         | CS        |
| TLA   | 1,342,977  | 336         | CS        |
| PUE   | 6,583,278  | 192         | CS        |
| HID   | 3,082,841  | 148         | CS        |
| NLE   | 5,784,442  | 90          | NE        |
| TAM   | 3,527,735  | 44          | NE        |
| COA   | 3,146,771  | 21          | NE        |
| BCN   | 3,769,020  | 53          | NW        |
| SIN   | 3,026,943  | 53          | NW        |
| SON   | 2,944,840  | 16          | NW        |
| CHH   | 3,741,869  | 15          | NW        |
| DUR   | 1,832,650  | 15          | NW        |
| BCS   | 798,477    | 11          | NW        |
| VER   | 8,062,579  | 112         | S         |
| TAB   | 2,402,598  | 97          | S         |
| CHP   | 5,217,908  | 76          | S         |
| YUC   | 2,320,898  | 59          | S         |
| GRO   | 3,540,685  | 56          | S         |
| OAX   | 4,131,148  | 44          | S         |
| ROO   | 1,857,985  | 42          | S         |
| CAM   | 928,363    | 16          | S         |
| JAL   | 8,348,151  | 148         | WE        |
| COL   | 731,391    | 130         | WE        |
| MIC   | 4,748,846  | 81          | WE        |
| NAY   | 1,235,456  | 44          | WE        |
