# Supplementary material for: Genetic Analysis of SARS-CoV-2 Variants in Mexico during the First Year of the COVID-19 Pandemic
Source: Viruses. 2021 Oct 26;13(11):2161. doi: 10.3390/v13112161 (PMC8622467; doi:10.3390/v13112161)
Supplement: Supplementary file 1 [file viruses-13-02161-s001.zip]

Archive with 7 entries (7 files):
- Supplementary_Figures.pdf
- SupplementaryTable_S1.pdf
- SupplementaryTable_S2.pdf
- SupplementaryTable_S3.pdf
- SupplementaryTable_S4.pdf
- SupplementaryTable_S5.pdf
- SupplementaryTable_S6.pdf
